# Supplementary material for: Molecular basis of wax-based color change and UV reflection in dragonflies
Source: eLife. 2019 Jan 15;8:e43045. doi: 10.7554/eLife.43045 (PMC6353593; doi:10.7554/eLife.43045)
Supplement: Figure 2—source data 1. [file elife-43045-fig2-data1.xlsx]

## Sheet: OalbistylumImmature-OCEAN
	Male	Male	Male	Male	Male	Male	Male	Male	Female	Female	Female	Female	Female	Female	Female	Female
wavelength	IM1D5	IM2D5	IM3D5	IM4D5	IM1V5	IM2V5	IM3V5	IM4V5	IF1D5	IF2D5	IF3D5	IF4D5	IF1V5	IF2V5	IF3V5	IF4V5	male D5	male V5	female D5	female V5	male D5SD	male V5SD	female D5SD	femalseV5SD
300	0.879	5.589	5.263	1.053	8.533	6.279	17.59	7.718	0.688	2.658	2.493	0.968	4.197	8.91	11.896	6.388	3.196	10.03	1.70175	7.84775	2.5794	5.12543	1.01761	3.3154
301	0.611	5.783	5.309	1.271	8.923	6.181	18.931	7.752	0.635	2.265	2.373	0.798	3.83	8.578	11.326	6.468	3.2435	10.4467	1.51775	7.5505	2.67931	5.76665	0.928641	3.17931
302	0.742	6.007	5.377	1.36	8.686	6.452	18.48	7.713	0.734	2.325	2.543	0.977	4.3	8.567	11.249	6.625	3.3715	10.3328	1.64475	7.68525	2.7036	5.50796	0.921041	2.94742
303	0.838	5.997	4.942	1.316	8.697	6.556	17.705	7.139	0.787	2.543	2.603	0.695	4.041	8.348	11.44	5.86	3.27325	10.0243	1.657	7.42225	2.57972	5.19965	1.05866	3.20795
304	0.537	6.273	5.267	1.267	7.919	5.95	18.037	7.155	0.324	2.424	2.663	0.919	4.264	8.724	11.427	6.435	3.336	9.76525	1.5825	7.7125	2.85598	5.57375	1.14013	3.0738
305	0.731	6.678	5.623	1.054	8.919	6.226	18.313	7.318	0.651	2.563	2.693	1.054	4.019	8.759	11.101	6.326	3.5215	10.194	1.74025	7.55125	3.06894	5.5245	1.03956	3.05709
306	0.662	6.971	5.288	1.139	8.846	6.25	17.852	7.528	0.704	2.517	2.427	0.873	4.013	8.775	11.202	6.123	3.515	10.119	1.63025	7.52825	3.10228	5.26315	0.975107	3.12957
307	1.03	7.007	5.46	1.47	8.58	6.227	18.322	7.723	0.565	2.75	2.657	1.048	3.803	8.796	11.803	6.137	3.74175	10.213	1.755	7.63475	2.9512	5.49275	1.11349	3.44714
308	0.534	6.193	5.269	0.885	8.54	6.167	17.695	7.702	0.593	2.651	2.515	0.572	4.151	8.781	11.474	6.531	3.22025	10.026	1.58275	7.73425	2.92711	5.20623	1.15635	3.12884
309	0.575	6.814	5.275	1.293	8.868	6.362	17.417	7.525	0.591	2.395	2.102	0.763	4.097	8.241	11.201	6.193	3.48925	10.043	1.46275	7.433	3.03091	5.02151	0.917847	3.0286
310	0.656	7.442	5.314	1.329	8.403	6.449	18.083	7.404	0.587	2.124	2.541	0.89	3.705	8.413	11.277	6.591	3.68525	10.0847	1.5355	7.4965	3.24008	5.39152	0.944049	3.17949
311	0.64	7.278	5.082	1.105	8.596	5.875	17.598	7.018	0.63	2.301	2.673	0.923	4.237	8.586	11.321	6.057	3.52625	9.77175	1.63175	7.55025	3.19838	5.33543	1.0063	3.08214
312	0.963	7.641	5.482	1.23	8.942	5.875	18.2	7.549	0.631	2.783	2.571	0.641	4.216	9.164	10.952	6.045	3.829	10.1415	1.6565	7.59425	3.27783	5.51671	1.18155	3.03048
313	0.795	7.37	5.537	1.1	9.121	6.244	17.869	7.645	0.532	2.427	2.584	0.825	3.879	8.64	10.9	6.414	3.7005	10.2198	1.592	7.45825	3.26815	5.23304	1.06351	3.00797
314	0.789	8.081	5.339	1.233	8.734	6.284	17.723	7.871	0.546	2.441	2.631	0.682	3.943	8.482	11.175	6.349	3.8605	10.153	1.575	7.48725	3.48025	5.14766	1.11376	3.0793
315	0.675	7.869	5.751	1.132	8.762	5.882	18.042	7.672	0.622	2.429	2.533	0.645	3.784	8.524	11.597	6.303	3.85675	10.0895	1.55725	7.552	3.52298	5.43298	1.06754	3.31987
316	0.559	8.158	5.754	1.668	8.94	6.004	18.077	7.042	0.589	2.333	2.343	0.828	3.989	8.55	11.231	6.253	4.03475	10.0158	1.52325	7.50575	3.5421	5.50994	0.945847	3.10402
317	0.695	8.006	5.678	1.151	8.986	5.573	17.517	7.143	0.498	2.5	2.49	0.733	4.159	8.815	11.112	6.122	3.8825	9.80475	1.55525	7.552	3.55192	5.32734	1.08937	3.04555
318	0.517	8.2	5.911	1.358	8.817	6.163	18.49	7.907	0.619	2.307	2.554	0.972	3.95	8.579	11.522	6.337	3.9965	10.3442	1.613	7.597	3.66985	5.54102	0.960214	3.22791
319	0.628	8.522	5.586	1.204	8.727	5.735	18.707	7.561	0.694	2.566	2.404	0.798	3.661	8.857	11.369	6.344	3.985	10.1825	1.6155	7.55775	3.74838	5.81487	1.00708	3.31016
320	0.885	8.716	5.366	1.389	9.284	5.761	18.167	7.79	0.524	2.468	2.567	0.953	4.114	8.639	11.643	6.087	4.089	10.2505	1.628	7.62075	3.67856	5.47159	1.04271	3.25909
321	0.769	9.131	5.679	1.128	8.917	6.092	18.248	7.164	1.027	2.57	2.537	0.509	4.063	8.741	10.883	6.271	4.17675	10.1053	1.66075	7.4895	3.98786	5.55198	1.05241	2.96129
322	0.88	8.394	5.509	1.422	9.214	5.673	17.922	7.15	0.583	2.408	2.353	0.629	3.866	8.587	11.061	6.042	4.05125	9.98975	1.49325	7.389	3.55689	5.48394	1.02493	3.11687
323	0.786	8.985	5.875	1.327	8.871	5.861	18.855	7.562	0.64	2.471	2.504	0.553	4.075	8.591	11.454	5.986	4.24325	10.2873	1.542	7.5265	3.89888	5.84325	1.09243	3.20647
324	0.765	9.269	5.578	1.132	8.82	5.844	18.258	7.032	0.465	2.43	2.496	0.545	3.88	8.82	11.072	5.9	4.186	9.9885	1.484	7.418	4.03339	5.64706	1.13124	3.1696
325	0.589	9.707	5.813	1.357	9.363	5.813	18.179	7.952	0.781	2.432	2.532	0.946	4.017	8.641	11.273	5.978	4.3665	10.3267	1.67275	7.47725	4.24028	5.43446	0.937755	3.16139
326	0.703	9.421	5.675	1.047	9.141	6.006	17.975	7.273	0.879	2.556	2.723	0.758	3.992	8.984	11.328	6.047	4.2115	10.0987	1.729	7.58775	4.14746	5.40642	1.05472	3.22709
327	0.285	9.5	5.291	1.028	9.153	5.977	17.629	7.347	0.652	2.338	2.524	0.384	3.731	8.242	11.183	5.977	4.026	10.0265	1.4745	7.28325	4.26411	5.23256	1.11247	3.18601
328	0.63	9.823	5.6	1.498	9.277	5.951	18.419	7.354	0.457	2.3	2.654	0.783	3.874	8.37	11.676	6.167	4.38775	10.2502	1.5485	7.52175	4.22228	5.6139	1.08999	3.32259
329	0.748	9.356	5.79	1.098	9.358	5.708	17.261	7.227	0.527	2.54	2.661	0.678	3.852	8.632	11.205	6.061	4.248	9.8885	1.6015	7.4375	4.10861	5.13794	1.15625	3.18179
330	0.571	10.496	5.902	1.186	9.694	5.684	17.639	7.565	0.478	2.646	2.799	0.791	3.781	8.673	11.055	6.502	4.53875	10.1455	1.6785	7.50275	4.63074	5.25739	1.21387	3.10059
331	0.743	9.913	6.111	1.438	9.237	5.862	18.098	7.314	0.678	2.207	2.717	0.899	3.617	8.594	11.876	5.959	4.55125	10.1278	1.62525	7.5115	4.29637	5.49036	0.992484	3.54956
332	0.882	10.093	5.862	1.12	9.073	5.682	17.641	7.646	0.837	2.399	2.321	0.677	3.974	8.972	11.204	5.834	4.48925	10.0105	1.5585	7.496	4.3837	5.27353	0.928341	3.21945
333	0.644	10.496	6.619	1.606	9.273	6.092	18.194	7.588	0.637	2.432	2.421	1.011	3.892	8.928	10.85	6.203	4.84125	10.2867	1.62525	7.46825	4.59058	5.42929	0.937729	3.05273
334	0.723	10.242	6.269	1.099	9.099	5.945	17.568	7.551	0.491	2.461	2.371	0.592	3.658	8.32	11.368	5.79	4.58325	10.0408	1.47875	7.284	4.54257	5.18075	1.08365	3.32326
335	0.644	10.094	5.955	0.971	9.522	5.955	17.612	7.279	0.54	2.369	2.645	0.662	3.625	8.464	10.936	5.829	4.416	10.092	1.554	7.2135	4.4983	5.22504	1.1073	3.17359
336	0.611	10.42	5.963	1.083	9.107	5.625	18.099	7.524	0.665	2.432	2.34	0.506	4.169	8.507	11.182	5.934	4.51925	10.0888	1.48575	7.448	4.61828	5.52663	1.04222	3.06095
337	0.415	11.151	6.176	1.432	9.133	5.511	18.585	7.174	0.683	2.364	2.525	0.767	3.881	8.764	11.024	6.132	4.7935	10.1007	1.58475	7.45025	4.92612	5.84667	0.995518	3.10778
338	0.393	10.683	5.893	1.543	9.273	5.334	17.752	7.494	0.729	2.3	2.122	0.749	3.759	8.355	11.204	5.716	4.628	9.96325	1.475	7.2585	4.6803	5.43655	0.853	3.23497
339	0.781	10.515	6.009	1.592	8.918	5.603	18.101	7.165	0.492	2.548	2.704	0.676	3.343	8.606	11.058	5.979	4.72425	9.94675	1.605	7.2465	4.49235	5.60227	1.18306	3.32764
340	0.489	10.819	6.129	1.173	9.194	5.769	18.324	7.348	0.906	2.396	2.057	0.829	3.807	8.378	10.473	6.301	4.6525	10.1588	1.547	7.23975	4.81828	5.62057	0.797351	2.85275
341	0.622	10.841	6.746	1.46	9.258	5.635	19.095	7.333	0.563	2.388	2.692	0.778	3.389	8.382	10.757	5.937	4.91725	10.3302	1.60525	7.11625	4.79016	6.0277	1.09001	3.16966
342	0.42	10.77	5.734	0.845	9.055	5.393	18.665	6.628	0.745	2.388	2.48	0.422	3.794	8.097	11.942	5.491	4.44225	9.93525	1.50875	7.331	4.85893	6.01535	1.07715	3.54702
343	0.751	11.269	6.516	1.209	9.44	5.047	18.863	7.709	0.306	2.716	2.439	1.029	3.676	8.49	10.929	5.814	4.93625	10.2647	1.6225	7.22725	4.96682	6.01018	1.14715	3.15733
344	0.933	10.742	5.958	1.276	9.091	5.371	17.858	6.882	0.352	2.543	2.827	0.42	3.9	8.712	11.039	5.589	4.72725	9.8005	1.5355	7.31	4.61878	5.58465	1.33267	3.18648
345	0.48	11.179	6.386	1.355	9.086	6.165	18.852	7.334	0.968	2.292	2.772	0.965	3.913	8.358	10.966	6.335	4.85	10.3592	1.74925	7.393	4.9574	5.78768	0.924841	2.99596
346	0.741	10.649	6.257	1.255	9.07	5.087	18.62	7.173	0.342	2.593	2.497	0.661	3.582	8.192	10.922	5.732	4.7255	9.9875	1.52325	7.107	4.6674	5.98047	1.18763	3.16479
347	0.727	11.323	6.104	1.266	8.947	5.618	18.745	7.439	0.603	2.319	2.347	0.624	3.544	7.946	11.157	5.913	4.855	10.1873	1.47325	7.14	4.94356	5.86527	0.992857	3.22607
348	0.275	10.802	5.821	1.293	8.936	5.104	18.004	7.376	0.563	2.361	1.99	0.385	3.303	8.236	10.528	5.156	4.54775	9.855	1.32475	6.80575	4.81617	5.65592	0.996622	3.20893
349	0.434	11.608	6.643	1.224	8.931	5.507	19.371	7.063	0.623	2.436	2.422	0.699	3.413	7.993	10.862	6.381	4.97725	10.218	1.545	7.16225	5.21119	6.26049	1.02124	3.11157
350	0.63	11.425	6.414	1.457	8.89	5.65	18.657	7.338	0.528	2.248	2.19	0.8	3.508	8.189	10.766	5.686	4.9815	10.1338	1.4415	7.03725	4.99761	5.83418	0.904931	3.13643
351	0.244	11.308	6.149	1.637	8.795	5.235	18.447	6.91	0.341	2.55	2.443	0.666	3.533	7.955	11.025	5.445	4.8345	9.84675	1.5	6.9895	4.99769	5.91504	1.15911	3.24296
352	0.708	11.105	6.169	1.013	9.481	5.028	18.122	7.127	0.504	2.625	2.639	0.847	3.897	8.434	10.882	5.23	4.74875	9.9395	1.65375	7.11075	4.92282	5.75026	1.13825	3.15377
353	0.479	11.538	6.347	1.12	8.996	5.44	18.24	7.573	0.456	2.464	2.59	0.729	3.489	7.954	10.489	6.027	4.871	10.0623	1.55975	6.98975	5.16356	5.64429	1.12361	2.96404
354	0.56	11.923	6.965	1.741	9.467	5.188	18.497	7.534	0.395	2.284	2.356	1.244	3.618	8.533	11.162	6.219	5.29725	10.1715	1.56975	7.383	5.2208	5.81956	0.93354	3.22146
355	0.652	11.975	6.235	0.901	9.349	5.51	18.421	6.906	0.671	2.4	2.358	0.653	3.684	8.365	10.931	6.005	4.94075	10.0465	1.5205	7.24625	5.35004	5.80406	0.991486	3.1123
356	0.526	11.984	6.378	1.32	9.503	5.057	18.087	7.183	0.478	2.521	2.299	0.857	3.542	8.298	10.985	5.863	5.052	9.9575	1.53875	7.172	5.29853	5.71571	1.02189	3.19881
357	0.559	12.019	7.129	1.404	9.12	5.221	17.145	7.855	0.639	2.515	2.413	0.899	3.769	8.167	10.784	5.962	5.27775	9.83525	1.6165	7.1705	5.35861	5.13669	0.985229	3.0045
358	0.718	12.527	7.034	0.871	9.19	5.56	18.054	7.804	0.934	2.407	2.46	0.988	3.502	8.525	11.464	5.845	5.2875	10.152	1.69725	7.334	5.65233	5.47621	0.850709	3.43398
359	0.775	12.824	6.599	1.443	9.779	5.204	17.915	7.831	0.629	2.855	2.584	0.859	3.815	8.655	11.239	5.95	5.41025	10.1822	1.73175	7.41475	5.58574	5.48542	1.14975	3.22835
360	0.741	11.708	6.998	1.194	9.042	5.091	18.126	7.032	0.301	2.224	2.515	0.597	3.696	8.406	11.226	6.169	5.16025	9.82275	1.40925	7.37425	5.21253	5.76574	1.12168	3.20846
361	0.551	12.74	6.903	1.534	9.228	5.436	18.526	7.504	0.686	2.646	2.069	0.834	3.675	8.502	10.92	5.953	5.432	10.1735	1.55875	7.2625	5.61514	5.78009	0.953838	3.13574
362	0.745	11.888	6.65	1.429	9.068	5.09	18.292	6.864	0.629	2.5	2.579	0.558	3.582	8.257	11.062	5.665	5.178	9.8285	1.5665	7.1415	5.19286	5.87227	1.12436	3.23856
363	0.867	12.935	6.747	1.167	9.37	5.276	18.059	7.034	0.758	2.789	3.114	0.304	3.64	8.693	11.754	5.462	5.429	9.93475	1.74125	7.38725	5.68781	5.66982	1.41594	3.58339
364	0.541	12.628	6.633	1.814	9.076	5.021	18.522	7.893	0.717	2.502	2.651	1.209	4.069	8.4	10.916	5.844	5.404	10.128	1.76975	7.30725	5.48433	5.84929	0.954902	2.99135
365	0.773	13.07	7.233	1.634	9.561	5.14	18.431	8.237	0.445	2.604	2.495	1.021	3.56	8.53	12.056	6.144	5.6775	10.3423	1.64125	7.5725	5.70008	5.70186	1.07572	3.61291
366	0.59	12.569	6.705	1.529	9.331	5.428	18.972	7.478	0.891	2.561	2.239	0.823	3.826	8.004	10.739	5.444	5.34825	10.3023	1.6285	7.00325	5.51385	5.99563	0.900926	3.02674
367	0.579	13.305	6.594	1.292	9.102	5.101	18.389	7.718	0.458	2.518	2.289	1.074	3.457	7.715	10.866	6.007	5.4425	10.0775	1.58475	7.01125	5.88855	5.78404	0.982744	3.10889
368	0.575	12.873	6.852	1.425	9.018	5.699	19.844	7.395	0.639	2.457	2.509	1.018	3.85	7.973	11.031	5.902	5.43125	10.489	1.65575	7.189	5.68716	6.38218	0.967909	3.0649
369	0.886	12.606	6.286	1.372	9.497	4.949	19.083	7.206	0.861	2.984	2.548	0.712	3.798	8.571	11.568	5.07	5.2875	10.1837	1.77625	7.25175	5.45472	6.21659	1.15824	3.51468
370	0.65	13.301	6.65	1.519	9.609	5.045	18.782	7.82	0.514	2.945	2.585	0.646	3.844	8.544	11.06	5.184	5.53	10.314	1.6725	7.158	5.81794	5.94941	1.27119	3.26731
371	0.448	13.395	6.947	1.389	9.585	5.041	19.416	7.374	0.627	2.635	2.424	0.481	3.494	8.73	11.449	5.843	5.54475	10.354	1.54175	7.379	5.96769	6.3198	1.14536	3.45652
372	0.966	13.824	6.939	1.65	9.629	5.182	19.343	7.968	0.683	2.729	2.575	0.728	3.747	7.964	11.071	5.998	5.84475	10.5305	1.67875	7.195	5.95158	6.15483	1.12572	3.10571
373	1.017	13.989	7.326	1.72	10.037	5.105	19.524	7.612	0.622	2.463	2.721	0.824	3.762	8.82	11.712	6.502	6.013	10.5695	1.6575	7.699	6.02025	6.30011	1.08733	3.38101
374	0.229	13.618	7.591	1.422	9.539	4.96	18.809	7.253	0.6	2.474	2.46	1.12	3.544	8.309	11.256	5.884	5.715	10.1402	1.6635	7.24825	6.17799	6.07399	0.951796	3.30504
375	0.797	13.947	6.894	1.573	10.094	4.861	18.101	8.149	0.219	2.922	2.684	0.672	3.62	8.248	11.604	5.727	5.80275	10.3012	1.62425	7.29975	6.06817	5.6305	1.37704	3.43705
376	0.524	13.941	7.006	1.412	9.26	4.879	18.338	7.024	0.308	2.393	2.124	0.483	3.788	7.844	10.973	5.469	5.72075	9.87525	1.327	7.0185	6.1859	5.91858	1.08355	3.11751
377	0.75	14.529	7.142	1.72	10.039	5.124	19.53	7.966	0.478	2.624	2.638	0.667	3.812	8.317	11.275	5.878	6.03525	10.6647	1.60175	7.3205	6.32255	6.24413	1.19099	3.21566
378	0.964	14.526	7.797	1.559	9.941	5.607	19.099	7.482	0.675	2.726	2.644	0.841	3.698	8.055	11.276	5.73	6.2115	10.5323	1.7215	7.18975	6.3463	5.98055	1.11512	3.25419
379	0.619	14.37	7.435	1.708	10.124	5.192	18.63	7.814	0.895	2.706	2.612	1.139	4.002	8.656	11.362	5.71	6.033	10.44	1.838	7.4325	6.31105	5.81989	0.954	3.24927
380	0.775	14.898	7.76	1.832	9.468	5.375	18.977	7.708	0.466	2.789	2.816	0.985	3.884	8.108	11.318	5.738	6.31625	10.382	1.764	7.262	6.49474	5.9702	1.21778	3.20938
381	0.281	14.419	7.96	2.277	9.949	5.436	19.485	8.401	0.571	2.877	2.498	1.271	4.309	8.546	11.212	6.195	6.23425	10.8178	1.80425	7.5655	6.35267	6.07398	1.07041	2.9856
382	0.526	14.825	7.421	1.594	9.791	6.093	19.589	7.97	0.716	2.853	2.784	1.063	4.296	8.42	11.19	6.217	6.0915	10.8607	1.854	7.53075	6.56363	6.01151	1.12304	2.96482
383	0.632	14.967	8.037	2.074	10.663	5.375	18.977	8.209	0.508	2.716	2.904	1.106	3.951	8.579	11.402	6.187	6.4275	10.806	1.8085	7.52975	6.53336	5.8602	1.18441	3.19925
384	0.499	14.92	7.54	1.717	9.996	5.31	19.345	7.487	0.426	2.662	2.703	0.761	4.085	8.554	11.16	6.389	6.169	10.5345	1.638	7.547	6.59365	6.17785	1.21393	3.02182
385	0.842	15.272	7.775	2.122	10.094	5.044	19.777	7.775	0.423	2.72	2.375	0.957	3.918	9.1	10.964	6.018	6.50275	10.6725	1.61875	7.5	6.57656	6.41098	1.10339	3.1404
386	0.71	14.681	7.891	1.943	10.161	4.556	20.56	7.942	0.624	2.731	2.731	0.842	4.328	8.3	11.647	5.518	6.30625	10.8048	1.732	7.44825	6.40322	6.8998	1.15697	3.25662
387	0.872	15.396	7.843	1.555	10.27	5.588	19.481	7.912	0.757	2.815	2.855	0.666	4.582	8.988	11.525	6.237	6.4165	10.8127	1.77325	7.833	6.75875	6.08675	1.22667	3.05947
388	0.591	15.365	7.624	2.154	9.929	5.52	19.169	8.549	0.547	2.522	2.495	0.959	4.144	8.616	11.216	6.833	6.4335	10.7918	1.63075	7.70225	6.67428	5.88059	1.02746	2.97759
389	0.45	15.104	8.137	2.043	9.931	5.832	19.487	8.067	0.478	2.343	2.752	1.118	4.387	8.364	11.592	7.072	6.4335	10.8293	1.67275	7.85375	6.66229	6.01016	1.0566	2.99245
390	0.767	15.549	7.4	2.033	10.463	5.225	19.9	7.953	0.672	2.931	2.89	1.32	4.55	8.518	11.545	6.384	6.43725	10.8852	1.95325	7.74925	6.72062	6.37915	1.13668	3.00543
391	1.014	15.048	8.225	2.701	10.751	5.558	20	7.827	0.824	3.029	3.097	0.831	4.863	8.871	11.738	6.234	6.747	11.034	1.94525	7.9265	6.33321	6.34404	1.29097	3.03695
392	0.74	15.086	8.269	2.008	10.844	5.231	20.098	7.847	0.599	2.798	3.014	0.894	4.79	8.839	11.624	6.429	6.52575	11.005	1.82625	7.9205	6.58791	6.48127	1.25569	2.97681
393	1.054	15.84	8.024	2.141	11.108	5.796	19.687	8.616	0.683	3.216	2.527	1.288	4.505	9.135	11.419	6.527	6.76475	11.3018	1.9285	7.8965	6.7808	5.99657	1.15143	3.01771
394	0.515	15.651	7.718	2.269	10.861	5.646	19.743	7.879	0.767	2.781	2.656	1.072	4.855	8.872	11.848	6.557	6.53825	11.0322	1.819	8.033	6.80539	6.18765	1.04733	3.02965
395	0.518	15.964	7.892	2.18	10.828	5.514	19.532	8.378	1.064	2.938	2.994	0.595	5.797	9.051	11.766	5.982	6.6385	11.063	1.89775	8.149	6.97316	6.04924	1.24849	2.83573
396	0.882	16.369	8.372	2.648	11.309	5.796	19.428	8.426	0.935	3.182	2.713	1.127	4.983	8.994	11.667	6.673	7.06775	11.2398	1.98925	8.07925	6.97644	5.90491	1.12567	2.90247
397	0.747	16.074	8.405	2.609	11.332	6.006	19.926	8.212	1.273	3.166	2.935	1.296	5.515	9.402	11.617	6.829	6.95875	11.369	2.1675	8.34075	6.89651	6.10879	1.024	2.71602
398	0.656	15.657	8.186	2.349	11.241	5.633	20.082	8.067	0.98	2.991	3.056	0.868	4.942	8.972	11.228	6.858	6.712	11.2558	1.97375	8	6.77979	6.31628	1.2133	2.70926
399	1.115	16.495	8.038	2.441	11.966	5.458	19.512	8.771	0.75	3.237	3.438	1.36	5.321	9.334	11.442	7.01	7.02225	11.4268	2.19625	8.27675	6.99162	6.00947	1.34363	2.67567
400	0.703	17.062	8.686	2.591	12.268	5.876	20.237	8.923	0.389	2.884	3.264	1.058	5.419	9.595	11.775	6.697	7.2605	11.826	1.89875	8.3715	7.369	6.1852	1.39294	2.86368
401	0.863	16.936	8.858	2.741	12.32	5.99	21.292	8.64	1.338	3.027	2.956	1.434	5.352	9.844	11.768	7.243	7.3495	12.0605	2.18875	8.55175	7.24545	6.67929	0.928217	2.82639
402	0.614	16.888	8.998	3.199	11.486	6.344	20.578	8.944	0.776	2.973	3.182	1.545	5.922	9.337	11.835	6.926	7.42475	11.838	2.119	8.505	7.21737	6.1933	1.1536	2.64236
403	1.064	16.319	8.311	2.871	11.598	5.636	20.046	8.525	0.971	3.138	3.206	1.248	5.954	10.097	11.379	7.312	7.14125	11.4512	2.14075	8.6855	6.85	6.22552	1.19646	2.48964
404	1.031	17.537	9.53	3.286	12.422	5.984	20.529	8.44	1.033	3.132	3.449	1.764	5.967	10.123	11.722	7.506	7.846	11.8438	2.3445	8.8295	7.39345	6.36894	1.13975	2.58104
405	0.888	16.162	8.571	2.685	11.869	5.439	20.516	8.158	0.771	3.007	3.789	1.033	5.652	9.63	11.922	7.487	7.0765	11.4955	2.15	8.67275	6.8887	6.5658	1.47988	2.70831
406	0.925	16.856	8.428	2.952	12.64	5.53	20.661	8.268	1.044	3.326	3.284	1.138	6.35	9.88	11.674	7.183	7.29025	11.7748	2.198	8.77175	7.12121	6.60829	1.27894	2.45223
407	0.996	16.819	8.821	3.459	13.09	5.582	21.34	8.949	1.202	3.515	4.027	1.281	6.783	9.875	11.981	7.723	7.52375	12.2402	2.50625	9.0905	7.00519	6.79932	1.47564	2.32128
408	0.911	17.088	8.609	2.658	12.655	5.69	20.569	8.572	0.717	3.701	3.801	1.067	5.925	10.164	11.601	7.524	7.3165	11.8715	2.3215	8.8035	7.30034	6.46421	1.65732	2.55603
409	1.045	17.487	8.901	3.553	13.203	5.311	21.04	8.901	0.792	3.454	3.802	1.517	6.722	10.487	11.588	7.198	7.7465	12.1137	2.39125	8.99875	7.27337	6.76914	1.46533	2.40454
410	0.895	17.893	9.393	3.575	13.256	5.571	20.974	9.298	0.877	3.48	4.245	1.654	6.69	10.874	11.408	7.378	7.939	12.2748	2.564	9.0875	7.5246	6.59396	1.56406	2.39769
411	0.899	16.781	9.213	3.383	13.318	5.581	19.992	8.276	0.9	3.816	4.213	1.376	7.016	10.401	12.198	7.683	7.569	11.7918	2.57625	9.3245	7.06105	6.33791	1.67992	2.41105
412	0.913	18.189	8.362	3.439	13.281	5.919	20.65	9.113	0.792	3.422	4.509	1.372	6.978	10.033	11.991	6.746	7.72575	12.2407	2.52375	8.937	7.63051	6.36514	1.73911	2.5276
413	1.014	17.947	9.043	3.842	13.553	6.186	21.533	8.747	1.06	3.608	4.309	1.734	7.386	11.063	11.555	8.333	7.9615	12.5048	2.67775	9.58425	7.44128	6.74921	1.53124	2.03867
414	1.264	18.157	9.514	3.33	14.065	5.728	21.051	9.257	1.232	3.821	4.951	1.269	7.164	10.705	11.463	7.869	8.06625	12.5252	2.81825	9.30025	7.58555	6.63183	1.8682	2.10261
415	1.263	18.171	8.9	4.038	14.647	6.057	20.602	9.188	0.997	4.035	4.651	1.607	7.437	11.227	11.72	7.581	8.093	12.6235	2.8225	9.49125	7.42315	6.3946	1.79104	2.29849
416	0.953	17.424	9.696	3.874	14.145	5.969	20.921	8.691	1.053	4.08	4.461	1.403	7.569	11.383	11.907	7.267	7.98675	12.4315	2.74925	9.5315	7.26571	6.60209	1.76924	2.45292
417	1.202	18.166	8.893	4.171	14.297	6.246	20.326	8.723	1.112	3.526	4.614	1.927	8.224	10.902	11.617	7.643	8.108	12.398	2.79475	9.5965	7.41558	6.26663	1.57364	1.95675
418	0.952	17.806	9.355	4.473	15.281	6.516	21.462	9.161	1.335	3.856	4.919	1.613	7.699	11.171	11.996	8.495	8.1465	13.105	2.93075	9.84025	7.30347	6.67194	1.74089	2.06662
419	1.19	17.577	9.666	3.895	15.368	6.24	19.841	9.095	1.212	3.927	4.422	1.815	8.104	10.838	11.024	8.646	8.082	12.636	2.844	9.653	7.25017	6.13252	1.569	1.49413
420	1.042	19.071	9.668	4.721	14.97	6.25	20.582	9.535	1.173	4.329	5.082	1.945	7.633	11.655	11.843	8.421	8.6255	12.8343	3.13225	9.888	7.80918	6.29355	1.86922	2.1742
421	0.788	18.853	10.541	4.805	15.114	6.485	21.355	9.079	1.203	3.87	5.362	2.156	8.504	11.413	12.046	9.207	8.74675	13.0083	3.14775	10.2925	7.83655	6.63562	1.84302	1.70366
422	1.332	18.674	9.623	4.414	15.58	6.428	21.777	8.792	1.224	4.564	5.785	2.124	8.088	12.25	12.5	8.146	8.51075	13.1442	3.42425	10.246	7.59049	6.9404	2.11376	2.46059
423	1.621	18.734	10.123	5.118	15.311	6.406	21.274	9.115	0.666	4.448	5.293	1.905	8.056	11.722	12.471	8.835	8.899	13.0265	3.078	10.271	7.42722	6.64257	2.15846	2.15358
424	1.344	18.387	9.848	5.123	15.454	6.338	21.195	9.545	1.011	4.446	5.718	1.803	8.235	12.023	12.237	8.558	8.6755	13.133	3.2445	10.2632	7.34981	6.56832	2.20819	2.16133
425	1.386	17.892	9.347	4.654	15.161	6.414	21.646	9.21	1.48	4.874	5.749	1.74	9.087	11.396	12.184	7.939	8.31975	13.1078	3.46075	10.1515	7.16933	6.76058	2.16931	1.97553
426	1.217	19.451	9.785	5.855	16.005	6.697	22.819	10.106	1.782	4.479	5.546	2.908	9.187	11.497	12.248	9.184	9.077	13.9068	3.67875	10.529	7.75203	7.07712	1.66521	1.58135
427	1.5	18.069	9.339	5.14	15.308	6.474	22.837	9.437	1.183	4.41	5.434	2.021	9.255	12.012	11.967	8.103	8.512	13.514	3.262	10.3343	7.13112	7.2185	1.99147	1.96842
428	1.71	19.241	9.659	5.558	15.927	6.918	22.403	10.291	1.448	4.551	5.978	1.821	8.762	11.532	12.168	8.796	9.042	13.8848	3.4495	10.3145	7.53429	6.7868	2.18057	1.79201
429	1.419	18.446	9.67	5.93	15.583	6.714	22.514	10.071	1.399	4.352	5.203	2.281	9.283	11.245	11.799	8.63	8.86625	13.7205	3.30875	10.2393	7.22267	6.90904	1.76824	1.52189
430	1.587	18.857	10.167	6.019	15.713	6.731	21.617	10.132	1.097	4.735	5.869	2.172	9.778	11.178	11.658	8.387	9.1575	13.5482	3.46825	10.2503	7.35441	6.53035	2.21144	1.47617
431	1.279	20.181	10.367	6.344	15.281	7.493	23.034	11.291	1.179	4.594	5.336	2.73	9.702	10.73	11.151	8.971	9.54275	14.2748	3.45975	10.1385	8.00777	6.64911	1.87449	0.988031
432	0.914	18.29	10.497	5.447	15.69	6.914	22.543	10.769	1.336	3.926	5.425	2.451	9.646	10.475	10.91	8.967	8.787	13.979	3.2845	9.9995	7.44694	6.74507	1.77807	0.86528
433	1.73	18.9	10.586	6.21	15.752	7.022	22.401	11.607	1.278	4.878	5.549	2.292	9.251	10.829	12.187	8.314	9.3565	14.1955	3.49925	10.1452	7.31788	6.52974	2.04074	1.71167
434	1.294	17.842	10.431	6.039	15.488	7.348	23.48	11.782	1.551	4.606	5.479	2.238	10.296	10.716	11.665	8.995	8.9015	14.5245	3.4685	10.418	7.03183	6.83503	1.87323	1.1081
435	1.498	18.691	11.751	6.13	16.18	7.425	22.184	11.751	1.279	4.224	5.452	2.313	10.03	10.553	11.015	9.114	9.5175	14.385	3.317	10.178	7.41461	6.30941	1.8746	0.815515
436	1.425	19.349	10.596	6.482	16.44	7.821	22.459	13.107	1.428	4.342	5.734	2.655	10.014	10.027	11.352	9.28	9.463	14.9567	3.53975	10.1682	7.58315	6.13254	1.88862	0.86294
437	1.204	18.662	12.219	7.406	16.618	7.875	22.538	14.367	1.649	4.8	5.746	2.987	10.984	10.545	11.767	10.047	9.87275	15.3495	3.7955	10.8358	7.39342	6.05852	1.83254	0.729353
438	1.245	19.452	11.909	6.484	16.808	8.06	21.7	13.33	1.944	4.669	5.568	2.299	11.685	10.133	11.067	9.61	9.7725	14.9745	3.62	10.6237	7.78438	5.74772	1.77474	0.929381
439	1.491	19.615	11.159	6.931	16.73	7.225	21.327	14.075	1.648	4.277	5.93	3.051	11.086	10.332	11.267	9.232	9.799	14.8392	3.7265	10.4793	7.64748	5.89425	1.81979	0.924844
440	1.022	19.562	10.766	6.077	16.67	7.603	20.061	13.485	1.118	4.572	5.947	2.553	11.163	9.645	11.355	9.073	9.35675	14.4548	3.5475	10.309	7.88158	5.29856	2.13687	1.12428
441	1.12	18.464	12.049	6.846	17.089	7.817	19.811	15.391	1.544	4.424	5.25	2.749	11.431	9.949	11.582	9.838	9.61975	15.027	3.49175	10.7	7.39508	5.13988	1.66393	0.934404
442	1.403	19.255	12.282	7.237	16.706	7.845	18.938	15.267	1.4	4.639	6.024	3.328	11.215	10.43	11.167	9.614	10.0442	14.689	3.84775	10.6065	7.58062	4.80613	1.9684	0.752915
443	1.351	18.735	12.463	7.008	16.794	8.399	18.762	16.499	1.232	4.514	5.865	3.3	12.574	9.97	11.356	9.872	9.88925	15.1135	3.72775	10.943	7.44031	4.58766	1.96619	1.28121
444	1.609	19.517	12.95	8.3	16.621	8.668	19.543	16.181	1.446	4.005	5.82	3.625	12.145	9.534	10.305	9.693	10.594	15.2532	3.724	10.4192	7.55344	4.63677	1.79548	1.19755
445	1.113	18.907	13.572	8.159	16.628	9.376	19.555	16.421	1.379	4.124	5.646	3.16	12.347	9.198	10.867	10.567	10.4377	15.495	3.57725	10.7448	7.6091	4.32307	1.78746	1.29179
446	1.191	18.902	13.81	8.023	16.641	9.389	19.548	16.99	1.504	4.687	5.374	3.477	12.969	8.916	10.687	10.308	10.4815	15.642	3.7605	10.72	7.62324	4.36547	1.69646	1.68159
447	1.367	19.16	13.477	8.329	16.684	9.689	19.743	18.941	1.504	4.806	6.052	3.691	12.973	8.755	11.053	9.713	10.5833	16.2643	4.01325	10.6235	7.57089	4.57081	1.9309	1.82802
448	1.369	17.602	13.417	7.779	16.826	9.847	20.384	18.759	1.253	4.595	5.386	3.545	13.687	8.733	10.878	10.217	10.0418	16.454	3.69475	10.8788	7.04477	4.63856	1.794	2.07593
449	1.828	17.215	14.023	8.595	16.135	9.43	20.604	19.352	1.716	4.925	5.62	3.536	12.997	8.763	10.802	9.774	10.4153	16.3803	3.94925	10.584	6.74059	5.00125	1.72256	1.81128
450	1.363	18.02	13.997	8.673	16.558	9.298	20.37	21.27	1.666	4.514	5.757	3.999	13.184	8.438	10.256	10.497	10.5132	16.874	3.984	10.5938	7.20188	5.44801	1.71248	1.95619
451	1.141	18.658	14.138	8.906	16.117	9.593	19.741	20.613	1.717	4.39	5.547	3.33	13.898	8.193	10.571	10.386	10.7107	16.516	3.746	10.762	7.52201	5.0091	1.6277	2.35316
452	1.428	19.008	14.21	8.638	16.782	9.491	19.515	20.288	1.709	4.38	5.679	3.519	14.161	8.295	9.883	10.104	10.821	16.519	3.82175	10.6107	7.561	4.92082	1.66497	2.50023
453	1.204	17.795	13.651	9.074	16.067	9.751	19.014	19.854	1.938	4.602	5.658	4.171	13.724	8.215	9.964	10.238	10.431	16.1715	4.09225	10.5352	7.10811	4.578	1.56614	2.30697
454	1.433	18.519	13.443	8.999	16.683	10.316	19.259	20.329	1.873	4.661	5.451	3.786	14.499	8.152	10.623	10.453	10.5985	16.6468	3.94275	10.9318	7.24316	4.48934	1.5383	2.63165
455	1.616	18.894	15.044	8.663	15.927	9.543	18.867	20.682	1.543	4.979	5.919	4.648	13.918	8.64	10.701	9.818	11.0542	16.2548	4.27225	10.7692	7.5758	4.88465	1.89748	2.26258
456	1.289	18.8	14.08	8.907	16.855	9.52	19.787	21.147	1.388	4.705	5.301	4.187	13.643	7.944	9.942	10.8	10.769	16.8272	3.89525	10.5823	7.50105	5.19028	1.73236	2.36544
457	1.477	18.205	14.65	9.203	17.164	10.161	19.289	20.6	1.84	5.27	5.346	4.236	13.595	8.97	10.707	10.388	10.8837	16.8035	4.173	10.915	7.28233	4.64915	1.63566	1.93962
458	1.591	19.037	14.127	9.579	15.898	9.531	19.4	20.126	1.608	4.658	6.018	4.451	14.017	8.404	10.271	10.305	11.0835	16.2387	4.18375	10.7492	7.41377	4.83785	1.8525	2.35262
459	1.892	18.4	15.186	9.249	16.793	9.715	18.057	20.658	1.947	4.758	6.155	3.803	14.24	8.6	10.797	9.47	11.1817	16.3057	4.16575	10.7767	7.26113	4.67919	1.76657	2.47927
460	1.765	18.771	15.106	9.645	16.653	10.024	19.291	20.922	1.7	4.782	5.936	5.035	14.473	8.09	10.272	10.875	11.3218	16.7225	4.36325	10.9275	7.39267	4.79957	1.84328	2.64918
461	1.549	18.837	14.703	9.64	16.899	9.684	19.39	21.203	1.61	5.016	5.895	4.179	14.592	7.891	10.504	10.745	11.1822	16.794	4.175	10.933	7.44242	5.05772	1.84796	2.76052
462	1.799	18.256	14.834	9.382	16.673	10.11	18.94	21.17	2.155	4.764	6.175	3.951	15.112	8.583	10.408	10.331	11.0677	16.7233	4.26125	11.1085	7.17884	4.77581	1.67807	2.79889
463	1.949	19.161	15.481	10.506	17.205	11.513	19.305	21.546	1.844	4.964	6.03	5.51	14.676	8.367	10.837	11.102	11.7743	17.3922	4.587	11.2455	7.44867	4.30166	1.87975	2.59753
464	1.729	18.491	14.65	9.893	17.024	10.629	18.272	21.616	2.06	4.804	6.104	4.419	15.031	8.166	11.004	10.888	11.1907	16.8852	4.34675	11.2722	7.22193	4.59938	1.68636	2.82823
465	1.814	19.094	14.899	9.834	17.283	10.685	18.203	21.25	1.944	5.222	6.007	3.839	14.705	8.249	10.582	10.586	11.4103	16.8553	4.253	11.0305	7.4338	4.44917	1.78123	2.68561
466	1.898	19.504	15.599	10.348	17.251	10.953	19.953	22.804	1.776	5.014	6.003	4.9	14.531	8.281	10.845	10.621	11.8373	17.7402	4.42325	11.0695	7.61438	5.06109	1.83301	2.58259
467	1.696	19.606	14.805	10.826	16.946	10.884	19.606	21.959	1.936	5.223	6.138	5.05	15.736	8.365	10.525	11.458	11.7332	17.3488	4.58675	11.521	7.59354	4.77161	1.83051	3.09422
468	2.168	19.368	15.701	9.91	17.313	10.756	18.691	22.151	1.917	5.627	6.494	4.513	15.262	8.318	10.82	10.399	11.7867	17.2278	4.63775	11.1997	7.50198	4.77041	1.98682	2.92072
469	2.025	18.781	15.375	10.771	17.224	10.808	19.113	22.629	2.081	5.008	6.416	5.432	15.145	8.309	11.061	10.974	11.738	17.4435	4.73425	11.3723	7.25968	4.95832	1.86457	2.82091
470	1.96	18.957	15.181	9.801	17.412	10.446	19.381	21.868	2.134	5.512	6.486	4.808	16.038	8.479	10.677	11.422	11.4748	17.2767	4.735	11.654	7.3723	4.90527	1.8655	3.17849
471	1.731	19.883	15.866	10.895	17.811	11.225	19.112	23.331	2.548	4.955	5.977	5.099	15.693	8.277	9.975	11.335	12.0938	17.8697	4.64475	11.32	7.82572	5.01746	1.469	3.17239
472	2.065	19.831	15.914	10.838	17.266	11.154	18.848	21.816	2.199	5.473	6.599	5.41	15.517	8.757	10.677	10.926	12.162	17.271	4.92025	11.4693	7.67232	4.49302	1.89462	2.86725
473	2.171	19.872	15.484	10.491	17.349	10.844	19.082	21.688	2.138	5.413	6.278	5.061	15.491	8.518	10.581	10.625	12.0045	17.2407	4.7225	11.3038	7.5937	4.62235	1.79728	2.95953
474	2.279	20.144	15.958	11.328	17.819	10.852	19.159	22.164	2.139	5.41	6.568	5.319	16.099	8.455	10.283	11.033	12.4273	17.4985	4.859	11.4675	7.66398	4.78897	1.90038	3.27199
475	2.038	19.739	15.484	10.667	17.399	11.001	18.417	22.215	2.505	5.806	6.516	5.212	15.973	8.736	10.729	11.032	11.982	17.258	5.00975	11.6175	7.5949	4.65779	1.75285	3.0771
476	2.315	19.629	15.368	11.471	17.464	10.654	18.17	22.067	2.361	5.319	6.545	5.371	15.715	8.102	10.085	10.581	12.1958	17.0887	4.899	11.1208	7.38175	4.74338	1.78418	3.24469
477	2.374	20.226	15.65	11.496	17.496	10.91	19.082	21.452	2.359	5.783	6.37	5.652	16.201	8.279	10.302	11.25	12.4365	17.235	5.041	11.508	7.59696	4.51915	1.81505	3.3651
478	2.342	19.759	15.573	11.131	17.551	10.643	18.937	21.813	2.609	5.687	6.713	5.662	16.64	8.672	10.708	10.951	12.2012	17.236	5.16775	11.7428	7.4574	4.74023	1.77472	3.42102
479	2.57	19.872	15.867	11.135	17.806	10.884	18.918	21.768	2.774	5.928	6.716	5.486	16.489	8.579	10.722	11.022	12.361	17.344	5.226	11.703	7.44029	4.6186	1.712	3.37102
480	2.651	19.727	15.388	11.844	18.15	10.611	18.637	22.217	2.598	6.014	6.878	5.75	16.862	8.557	11.315	10.966	12.4025	17.4037	5.31	11.925	7.25638	4.87807	1.87108	3.51232
481	2.368	20.437	16.005	12.062	18.005	11.171	18.996	22.232	2.734	6.12	6.837	5.946	16.512	8.445	10.661	10.829	12.718	17.601	5.40925	11.6118	7.70152	4.65118	1.82471	3.44274
482	2.742	20.369	16.864	12.274	18.142	11.039	18.66	22.377	2.625	6.015	6.966	5.339	16.599	8.622	11.281	10.927	13.0623	17.5545	5.23625	11.8573	7.63699	4.73552	1.86437	3.37384
483	2.849	20.38	15.99	11.73	18.514	10.773	18.965	21.664	2.747	6.242	7.021	5.78	16.747	8.785	11.217	11.153	12.7372	17.479	5.4475	11.9755	7.4785	4.68203	1.87175	3.37631
484	2.665	21.208	16.334	12.234	17.766	11.052	19.267	21.765	2.901	6.098	6.85	5.852	16.504	8.731	10.547	10.998	13.1102	17.4625	5.42525	11.695	7.87056	4.58092	1.73556	3.35239
485	2.812	20.778	16.454	12.705	18.293	10.726	19.528	22.392	2.744	6.112	6.676	6.612	16.819	8.418	10.767	11.175	13.1872	17.7347	5.536	11.7948	7.6631	4.97795	1.87833	3.56305
486	3.022	20.963	16.014	12.419	18.169	10.533	18.636	21.7	3.144	6.554	7.126	5.731	16.804	9.031	11.078	10.636	13.1045	17.2595	5.63875	11.8872	7.57953	4.74994	1.75897	3.39377
487	2.938	21.067	16.197	12.479	18.2	10.783	18.998	22.063	2.694	6.166	7.127	6.41	16.986	8.965	10.448	11.203	13.1702	17.511	5.59925	11.9005	7.67456	4.78444	1.97931	3.51548
488	2.792	20.916	15.775	12.45	17.801	10.586	18.137	21.06	2.725	6.089	6.981	6.169	16.926	8.774	10.946	10.94	12.9832	16.896	5.491	11.8965	7.63475	4.45399	1.88752	3.50543
489	3.07	21.088	16.122	12.071	18.285	10.47	18.229	22.052	2.887	6.307	6.962	6.354	17.002	8.751	10.541	10.291	13.0877	17.259	5.6275	11.6462	7.62889	4.86679	1.85119	3.65718
490	2.835	21.825	15.732	12.802	18.112	11.07	19.427	21.941	2.894	6.251	7.314	6.06	16.54	8.219	10.355	11.054	13.2985	17.6375	5.62975	11.542	7.92369	4.6576	1.90544	3.54351
491	2.986	21.484	16.553	12.386	18.099	10.227	17.898	21.368	2.998	6.049	7.009	6.276	16.787	9.123	11.002	11.307	13.3523	16.898	5.583	12.0548	7.84778	4.72319	1.77136	3.29933
492	2.928	21.471	16.464	13.094	18.379	11.376	19.073	21.909	3.163	6.049	7.083	6.612	17.457	8.532	10.04	10.695	13.4893	17.6842	5.72675	11.681	7.83696	4.47414	1.76066	3.95573
493	3.383	21.668	16.409	13.219	18.647	11.576	18.62	21.999	3.499	6.368	7.508	6.538	17.866	8.706	10.454	11.023	13.6697	17.7105	5.97825	12.0122	7.6919	4.38663	1.72743	4.02511
494	3.507	21.736	17.273	13.499	18.318	10.922	18.162	21.43	3.443	6.822	7.538	7.056	17.505	8.925	11.037	11.367	14.0038	17.208	6.21475	12.2085	7.76557	4.45276	1.87172	3.693
495	3.287	22.097	16.884	14.015	18.082	11.687	19.303	20.925	3.326	6.389	7.323	6.835	17.311	8.609	10.619	10.635	14.0708	17.4992	5.96825	11.7935	7.92943	4.04603	1.80232	3.79936
496	3.64	21.004	16.073	13.062	18.627	10.415	17.745	22.167	3.405	6.492	7.619	6.56	17.578	8.858	10.722	10.502	13.4447	17.2385	6.019	11.915	7.31049	4.93406	1.81745	3.86586
497	3.609	22.531	17.432	13.766	18.342	10.76	18.261	21.197	3.615	6.594	7.482	7.417	18.502	8.608	10.689	11.111	14.3345	17.14	6.277	12.2275	8.00285	4.46711	1.82011	4.32372
498	3.813	22.707	17.231	13.717	19.183	11.276	17.965	21.818	3.562	6.579	7.745	7.734	17.737	8.562	10.8	10.612	14.367	17.5605	6.405	11.9278	7.94916	4.48766	1.97271	4.00328
499	3.905	22.837	16.813	14.46	19.227	11.404	19.122	22.307	3.417	6.777	7.657	7.99	18.013	8.716	10.784	11.218	14.5038	18.015	6.46025	12.1827	7.89749	4.64833	2.09237	4.03722
500	3.847	22.769	17.372	13.63	18.67	10.391	17.962	20.869	3.764	6.667	8.069	7.369	18.237	8.948	10.793	10.723	14.4045	16.973	6.46725	12.1752	7.97562	4.55922	1.89087	4.13036
501	3.787	23.415	17.136	14.243	18.703	11.007	18.523	22.103	3.704	7.101	8.208	7.532	18.726	8.869	10.843	10.589	14.6452	17.584	6.63625	12.2568	8.18893	4.68374	2.00722	4.40107
502	3.956	22.862	17.68	15.049	18.672	11.295	18.306	22.156	3.808	6.831	7.875	7.589	18.839	8.767	10.882	10.845	14.8867	17.6073	6.52575	12.3332	7.97735	4.55183	1.86461	4.44837
503	4.183	22.28	17.258	14.546	19.994	11.483	18.48	23	4.235	6.985	8.166	8.403	18.972	9.106	10.898	10.546	14.5668	18.2392	6.94725	12.3805	7.62801	4.88019	1.91157	4.46219
504	4.27	23.104	17.311	15.335	19.093	10.837	19.339	21.724	4.092	6.701	7.815	8.213	19.642	8.704	10.491	10.53	15.005	17.7482	6.70525	12.3418	7.87952	4.75783	1.85598	4.9408
505	4.339	23.253	18.018	14.949	19.536	10.832	18.541	21.394	4.16	7.235	8.144	8.214	18.893	8.528	10.655	10.724	15.1397	17.5757	6.93825	12.2	7.975	4.64871	1.90509	4.57695
506	4.211	23.109	16.721	15.291	19.836	11.111	18.893	22.295	3.918	6.959	8.311	8.541	18.948	8.466	10.66	10.695	14.833	18.0338	6.93225	12.1922	7.85479	4.83284	2.12724	4.62294
507	4.448	24.602	18.03	16.742	19.851	11.856	18.561	23.049	4.563	7.232	8.42	8.655	18.892	8.646	10.536	11.193	15.9555	18.3293	7.2175	12.3167	8.40846	4.70986	1.87608	4.5145
508	4.678	23.775	17.034	15.477	19.765	10.843	18.553	22.085	4.092	7.391	8.317	7.843	18.811	9.154	10.916	10.672	15.241	17.8115	6.91075	12.3882	7.90942	4.8713	1.91682	4.35221
509	4.43	23.636	17.424	15.739	19.901	10.928	18.731	20.777	4.33	7.483	8.378	9.299	20.107	8.631	11.098	10.928	15.3072	17.5843	7.3725	12.691	8.00728	4.51596	2.15959	5.07039
510	4.723	23.913	17.983	15.82	19.69	10.875	19.181	22.503	4.322	7.5	8.434	8.866	19.796	8.602	10.694	10.74	15.6098	18.0622	7.2805	12.458	8.02375	5.00926	2.05307	4.9926
511	4.971	24.714	17.851	16.107	20.099	11.251	19.07	21.639	4.901	7.299	8.575	9.169	19.779	8.451	10.699	10.313	15.9108	18.0147	7.486	12.3105	8.18491	4.6311	1.8917	5.07481
512	4.876	23.977	17.38	16.539	19.625	11.082	18.109	21.51	4.747	7.408	8.307	8.858	19.794	8.685	10.817	11.194	15.693	17.5815	7.33	12.6225	7.94132	4.55085	1.82275	4.90696
513	5.133	24.458	18.325	16.177	19.796	11.385	18.931	22.071	4.457	7.771	8.903	9.512	20.213	8.947	10.486	10.907	16.0232	18.0457	7.66075	12.6382	8.06359	4.63376	2.25436	5.11962
514	4.977	24.551	18.05	16.469	20.297	11.207	18.534	21.103	4.853	7.35	8.458	9.555	20.19	8.879	10.93	10.273	16.0117	17.7852	7.554	12.568	8.14551	4.5148	2.01314	5.15279
515	5.233	24.734	18.704	16.202	20.608	11.215	17.822	20.9	4.905	7.417	8.747	9.451	20.55	8.952	10.931	10.621	16.2183	17.6362	7.63	12.7635	8.15216	4.50001	2.00289	5.26325
516	5.569	24.487	18.383	16.874	20.556	11.384	18.453	20.803	5.275	8.188	9.069	9.858	20.346	9.175	11.052	11.086	16.3282	17.799	8.0975	12.9147	7.89191	4.40473	2.00149	5.034
517	5.946	25.284	18.473	16.787	20.366	11.455	18.369	21.758	5.449	8.011	9.007	9.701	21.059	8.945	10.465	11.06	16.6225	17.987	8.042	12.8823	8.00959	4.5714	1.86263	5.52343
518	5.861	25.213	18.705	17.015	20.722	10.842	18.153	21.415	5.503	7.899	9.071	10.574	21.12	9.408	11.1	10.591	16.6985	17.783	8.26175	13.0548	8.0431	4.83541	2.14038	5.42335
519	5.9	25.586	18.819	17.42	20.138	11.63	18.722	21.194	5.761	7.851	9.001	9.678	21.061	8.728	10.786	11.012	16.9312	17.921	8.07275	12.8968	8.17304	4.31455	1.71579	5.53898
520	5.97	25.741	19.048	17.582	20.275	11.685	18.034	21.747	5.352	8.146	9.144	10.546	21.613	9.059	11.009	11.232	17.0853	17.9352	8.297	13.2282	8.21726	4.43769	2.1963	5.67441
521	5.769	25.169	19.419	17.923	20.473	11.103	17.732	21.135	5.492	8.38	9.209	10.018	21.23	8.971	10.691	10.927	17.07	17.6107	8.27475	12.9548	8.15581	4.58179	1.97201	5.58529
522	6.427	25.759	18.676	18.088	20.507	11.774	18.816	21.756	5.523	8.406	9.235	11.214	21.034	9.235	10.951	11.536	17.2375	18.2132	8.5945	13.189	8.00574	4.45868	2.36232	5.32038
523	6.571	26.208	18.897	18.244	20.45	11.205	17.645	21.538	5.779	8.249	9.638	11.287	21.102	9.01	11.126	11.055	17.48	17.7095	8.73825	13.0732	8.11944	4.63611	2.33111	5.44169
524	6.477	25.845	19.224	18.03	20.848	11.844	18.451	21.123	6.002	8.639	9.695	10.786	21.519	9.36	11.481	10.975	17.394	18.0665	8.7805	13.3338	8.04889	4.31842	2.04926	5.53129
525	6.995	25.538	19.072	18.051	20.869	11.394	18.051	21.154	6.022	8.245	9.462	11.462	22.022	9.247	11.076	11.448	17.414	17.867	8.79775	13.4482	7.69653	4.53688	2.27668	5.79621
526	6.635	25.989	19.161	18.298	21.343	11.024	18.283	21.66	6.286	8.947	9.557	11.455	21.939	9.011	11.004	11.276	17.5207	18.0775	9.06125	13.3075	8.0313	4.94274	2.13626	5.84225
527	7.252	26.654	19.895	18.728	21.184	11.953	18.808	22.052	5.896	8.728	9.592	11.329	22.354	9.359	10.748	11.585	18.1322	18.4992	8.88625	13.5115	8.05113	4.57452	2.26802	5.96605
528	7.272	26.101	20.122	18.564	20.882	11.416	18.445	21.934	6.378	8.882	10.01	11.806	22.334	9.272	10.831	10.959	18.0147	18.1693	9.269	13.349	7.86419	4.73338	2.27252	6.03889
529	7.2	26.899	19.442	19.038	20.828	11.037	18.179	21.144	6.312	8.791	9.586	11.265	22.238	8.684	10.715	11.09	18.1448	17.797	8.9885	13.1818	8.14259	4.69868	2.06092	6.12932
530	7.232	26.317	18.721	18.398	21.345	11.412	18.112	21.641	6.569	8.991	10.211	11.877	21.949	9.068	11.222	10.032	17.667	18.1275	9.412	13.0678	7.86039	4.75378	2.23417	5.98602
531	7.797	26.357	19.805	19.281	21.288	11.382	18.158	22.052	6.705	8.531	9.65	11.962	21.981	9.119	10.712	10.577	18.31	18.22	9.212	13.0972	7.71266	4.86	2.19872	5.96625
532	7.679	27.03	19.522	19.151	20.499	10.641	17.835	21.172	6.488	9.448	9.804	12.329	22.478	9.047	10.961	10.864	18.3455	17.5368	9.51725	13.3375	7.9839	4.81769	2.3923	6.15692
533	7.883	27.417	20.226	19.745	21.44	11.888	18.802	22.019	6.848	9.24	9.834	11.999	22.423	9.027	10.608	11.518	18.8178	18.5373	9.48025	13.394	8.0903	4.6487	2.11784	6.10668
534	7.697	27.329	19.892	19.061	20.519	11.643	18.61	22.202	6.534	8.925	9.592	12.292	22.726	9.054	10.808	10.632	18.4948	18.2435	9.33575	13.305	8.10161	4.63855	2.36809	6.32999
535	7.885	27.506	20.282	19.072	21.025	11.334	18.31	21.558	7.042	9.268	10.035	12.08	22.848	9.019	10.523	10.87	18.6863	18.0568	9.60625	13.315	8.10659	4.70208	2.08111	6.40591
536	8.298	27.299	20.375	19.792	21.129	12.017	18.625	21.18	7.17	9.237	10.263	12.301	22.354	9.266	11.029	11.165	18.941	18.2377	9.74275	13.4535	7.87211	4.31524	2.13621	5.99637
537	8.441	28.339	19.781	20.282	21.147	11.301	19.028	21.238	7.305	9.748	10.082	12.461	23.017	9.09	10.845	11.442	19.2108	18.1785	9.899	13.5985	8.18098	4.69731	2.10942	6.35786
538	8.42	27.332	20.443	19.915	20.921	11.986	18.09	21.04	7.236	9.325	10.383	12.055	22.718	9.458	10.939	11.321	19.0275	18.0093	9.74975	13.609	7.83741	4.24067	2.0178	6.12559
539	8.361	28.089	20.567	20.119	21.722	11.627	18.776	22.004	7.186	9.751	10.104	12.915	23.561	9.523	11.448	11.124	19.284	18.5323	9.989	13.914	8.14828	4.8294	2.34437	6.48616
540	8.474	28.247	19.709	19.808	21.476	11.43	17.933	20.447	7.318	9.324	10.453	12.547	23.25	9.312	11.181	10.672	19.0595	17.8215	9.9105	13.6037	8.11265	4.5134	2.18407	6.47905
541	8.539	26.496	19.882	18.776	21.383	10.879	18.401	20.573	7.639	9.618	10.394	12.419	22.587	9.448	10.879	10.464	18.4232	17.809	10.0175	13.3445	7.4189	4.78848	1.97702	6.19092
542	8.42	29.597	21.318	20.525	20.891	12.307	19.081	21.522	7.668	9.052	9.661	13.548	23.497	8.967	10.67	10.822	19.965	18.4502	9.98225	13.489	8.72175	4.22415	2.51919	6.72478
543	8.653	29.427	21.8	21.022	20.969	11.82	18.65	20.736	7.468	9.771	10.324	13.027	23.273	9.575	10.939	10.838	20.2255	18.0437	10.1475	13.6562	8.59659	4.27816	2.28358	6.44113
544	8.749	28.375	20.327	20.048	21.526	11.661	18.191	21.466	7.561	9.516	10.952	13.379	22.999	9.26	10.769	10.603	19.3748	18.211	10.352	13.4078	8.06786	4.63635	2.45026	6.42976
545	8.442	28.665	21.256	20.664	21.449	12.09	17.859	20.644	7.625	9.474	10.422	13.493	23.748	9.284	10.778	10.371	19.7568	18.0105	10.2535	13.5453	8.37559	4.23611	2.45217	6.83101
546	8.712	28.527	20.432	20.627	21.403	11.675	18.233	21.035	7.472	9.548	10.231	13.349	23.342	9.065	10.254	10.625	19.5745	18.0865	10.15	13.3215	8.16464	4.50265	2.43408	6.71339
547	8.831	28.649	20.571	20.918	20.821	11.683	17.872	20.397	7.931	9.557	9.674	13.784	22.641	9.077	10.457	11.51	19.7422	17.6932	10.2365	13.4212	8.17424	4.213	2.49521	6.22672
548	9.045	28.387	20.519	20.344	21.498	11.89	17.981	21.925	8.035	9.717	10.645	14.077	24.19	8.975	10.436	11.714	19.5738	18.3235	10.6185	13.8287	7.95853	4.6388	2.54618	6.99755
549	8.573	29.51	20.777	21.256	20.394	11.586	18.69	22.003	8.006	9.667	10.397	13.635	23.028	8.755	10.34	10.973	20.029	18.1683	10.4262	13.274	8.62543	4.59193	2.36157	6.56924
550	9.205	29.709	21.213	21.384	22.091	11.728	18.628	21.536	7.834	9.98	10.443	13.381	23.131	9.077	10.698	11.785	20.3777	18.4958	10.4095	13.6728	8.43826	4.76056	2.2839	6.40292
551	9.305	28.724	20.575	20.981	21.47	11.91	17.791	20.704	7.656	9.998	10.221	13.569	23.179	9.406	10.802	10.675	19.8963	17.9688	10.361	13.5155	7.99461	4.33899	2.43308	6.47309
552	9.295	29.382	21.972	20.399	21.551	12.075	18.203	20.472	8.035	10.226	10.958	13.941	23.645	8.984	10.914	10.355	20.262	18.0752	10.79	13.4745	8.29442	4.23653	2.4403	6.82864
553	9.596	29.861	21.069	20.89	21.703	11.615	18.138	21.533	8.372	9.875	10.768	13.939	22.898	9.027	11.169	11.276	20.354	18.2473	10.7385	13.5925	8.30494	4.71653	2.3516	6.28956
554	9.277	29.453	21.285	21.105	20.985	12.199	18.784	21.087	8.513	9.766	10.265	13.836	23.977	8.746	10.818	11.245	20.28	18.2637	10.595	13.6965	8.30463	4.18042	2.2829	6.94002
555	9.776	30.115	21.395	21.251	21.72	12.172	18.68	21.377	8.027	10.146	10.604	13.538	23.775	9.318	10.484	11.543	20.6343	18.4872	10.5787	13.78	8.34157	4.42421	2.26984	6.72501
556	9.425	29.647	21.07	21.726	20.973	11.466	19.068	21.744	7.975	10.033	10.492	13.716	23.541	9.03	10.791	10.916	20.467	18.3128	10.554	13.5695	8.3296	4.70102	2.3752	6.70321
557	9.531	29.698	21.863	21.987	21.479	12.899	18.211	21.211	8.333	10.198	10.855	13.94	23.433	9.257	10.876	11.135	20.7697	18.45	10.8315	13.6752	8.34066	3.98617	2.33146	6.55803
558	9.754	29.871	22.43	21.883	21.33	12.185	18.991	21.601	8.159	9.988	10.809	14.371	23.134	8.826	10.5	10.651	20.9845	18.5267	10.8317	13.2778	8.32648	4.3872	2.60655	6.62267
559	9.463	29.068	21.317	21.625	20.751	11.891	18.512	21.146	8.506	10.307	10.813	13.584	23.755	9.452	10.296	10.368	20.3682	18.075	10.8025	13.4678	8.10534	4.28271	2.10209	6.87076
560	9.922	29.449	21.053	21.78	20.951	12.015	19.235	21.347	8.174	10.375	10.744	13.643	23.977	9.3	10.607	10.474	20.551	18.387	10.734	13.5895	8.03974	4.34577	2.24684	6.94986
561	10.001	31.098	21.726	22.367	21.773	12.717	19.006	21.102	8.198	10.407	10.699	14.969	23.487	9.772	11.147	11.92	21.298	18.6495	11.0683	14.0815	8.66003	4.12685	2.83006	6.33295
562	10.195	29.973	21.945	22.749	21.928	12.153	18.692	21.636	8.702	10.854	10.99	14.789	24.326	9.776	10.99	10.852	21.2155	18.6023	11.3338	13.986	8.18594	4.54111	2.53069	6.91466
563	10.162	30.03	21.534	22.123	21.339	12.248	18.573	20.76	8.324	10.804	10.835	14.334	23.502	9.407	10.67	11.474	20.9623	18.23	11.0742	13.7632	8.17606	4.16208	2.47118	6.548
564	10.227	30.365	22.198	22.282	21.614	12.149	18.333	21.341	8.538	10.61	10.693	15.023	24.061	9.439	11.025	11.712	21.268	18.3592	11.216	14.0592	8.29763	4.39894	2.72676	6.73543
565	9.691	30.192	21.284	21.735	21.116	11.61	17.915	20.634	8.691	10.446	10.844	14.162	23.899	9.364	10.752	11.343	20.7255	17.8188	11.0358	13.8395	8.42033	4.37246	2.28443	6.75744
566	11.15	30.813	21.81	21.082	21.898	11.517	18.6	20.602	8.705	10.789	11.006	13.834	23.459	9.83	11.47	10.74	21.2137	18.1543	11.0835	13.8748	8.03736	4.62814	2.10675	6.42462
567	10.705	30.146	22.044	22.536	21.662	11.563	18.091	20.978	8.677	11.119	11.099	14.647	23.943	9.574	11.18	11.661	21.3577	18.0735	11.3855	14.0895	8.01194	4.60798	2.45808	6.62933
568	10.536	30.428	22.105	22.155	21.484	12.303	18.569	20.411	8.616	10.346	11.108	14.77	24.08	9.333	11.068	11.826	21.306	18.1918	11.21	14.0767	8.17645	4.10624	2.59225	6.74998
569	10.656	30.684	22.202	22.105	21.523	12.05	18.634	19.964	8.931	10.426	10.847	13.883	23.433	9.596	10.526	11.19	21.4118	18.0427	11.0218	13.6862	8.22123	4.16597	2.07713	6.53064
570	10.731	31.005	22.235	21.924	21.503	11.829	18.717	21.106	9.148	10.622	10.771	14.152	23.715	9.576	10.821	11.06	21.4737	18.2888	11.1732	13.793	8.3073	4.47884	2.11662	6.64658
571	10.618	31.023	22.187	21.995	21.521	11.782	19.305	21.05	8.712	10.893	10.795	15.239	23.916	9.558	10.736	11.83	21.4558	18.4145	11.4097	14.01	8.36291	4.52325	2.74384	6.66885
572	11.161	30.701	22.172	22.123	22.063	12.138	18.611	21.201	8.926	10.972	11.22	14.63	24.318	9.274	10.913	10.811	21.5393	18.5033	11.437	13.829	8.00806	4.4899	2.36387	7.03275
573	11.106	30.584	21.637	22.512	21.557	12.609	18.023	21.366	9.161	10.822	11.057	14.934	24.074	9.533	10.695	10.986	21.4597	18.3887	11.4935	13.822	7.99147	4.18095	2.44397	6.86343
574	10.64	31.005	22.052	22.826	22.114	12.421	18.729	21.278	8.827	11.072	11.219	15.406	23.646	9.513	11.199	11.163	21.6307	18.6355	11.631	13.8803	8.37216	4.38602	2.7444	6.55783
575	11.17	31.372	22.331	22.855	22.31	12.403	18.62	21.586	8.821	11.189	11.229	14.941	24.216	9.759	10.896	11.372	21.932	18.7297	11.545	14.0608	8.28544	4.50985	2.52848	6.8039
576	11.173	30.977	22.415	23.044	21.722	12.057	18.102	20.778	9.304	11.075	11.183	15.284	23.662	9.848	11.007	11.286	21.9022	18.1647	11.7115	13.9507	8.14523	4.35093	2.53267	6.50404
577	11.064	30.477	22.205	23.387	21.881	12.144	18.815	20.479	8.923	11.074	11.398	14.523	23.404	9.033	10.816	11.476	21.7832	18.3298	11.4795	13.6822	8.02566	4.31005	2.30721	6.5628
578	11.513	31.614	22.188	22.749	21.702	12.574	18.526	21.393	9.217	10.755	11.532	14.942	24.042	9.663	11.005	11.904	22.016	18.5488	11.6115	14.1535	8.22601	4.23206	2.41976	6.65633
579	11.228	30.969	22.097	22.174	22.031	11.939	18.164	20.873	9.184	11.344	11.18	14.71	24.488	9.501	11.189	11.056	21.617	18.2518	11.6045	14.0585	8.0815	4.5097	2.29136	6.9951
580	11.141	31.144	21.991	22.555	21.823	12.476	19.185	20.235	9.33	11.256	11.189	15.063	23.845	9.668	11.036	10.596	21.7077	18.4297	11.7095	13.7862	8.19547	4.11463	2.40725	6.73003
581	11.556	31.59	22.809	23.447	21.896	12.004	18.434	20.972	9.422	11.144	11.173	15.6	23.633	9.785	10.943	11.428	22.3505	18.3265	11.8348	13.9473	8.23209	4.4619	2.6403	6.49385
582	11.248	30.606	22.033	22.954	21.158	12.383	17.958	20.128	8.94	11.104	11.479	14.756	24.271	9.285	10.902	11.477	21.7103	17.9067	11.5697	13.9838	7.96334	3.91659	2.4009	6.92066
583	11.197	31.354	22.71	22.57	21.573	11.863	18.943	20.631	9.433	10.71	11.121	15.255	23.986	9.431	10.939	11.519	21.9577	18.2525	11.6298	13.9688	8.26688	4.39642	2.52144	6.7359
584	11.558	30.834	22.31	22.869	21.948	12.374	18.988	21.286	9.686	11.299	11.529	14.765	23.578	9.786	11.242	11.753	21.8927	18.649	11.8197	14.0897	7.9137	4.37141	2.12784	6.38016
585	11.624	31.316	22.74	22.709	21.801	12.384	18.591	20.96	8.888	11.005	11.062	14.706	24.276	9.539	10.625	11.223	22.0972	18.434	11.4153	13.9157	8.0718	4.25615	2.41586	6.94192
586	11.438	31.675	23.674	23.004	21.653	12.757	19.136	21.382	9.447	11.639	11.467	16.095	23.331	9.881	10.731	11.354	22.4478	18.732	12.162	13.8243	8.33006	4.13999	2.80454	6.36652
587	11.397	30.636	22.684	23.043	21.406	12.232	18.107	20.45	9.281	11.072	11.819	15.216	23.385	9.539	11.081	11.483	21.94	18.0487	11.847	13.872	7.9277	4.11805	2.48569	6.39711
588	11.243	31.488	22.983	22.952	21.69	12.32	18.418	21.388	9.406	11.413	11.403	14.837	23.677	9.558	10.59	11.366	22.1665	18.454	11.7647	13.7978	8.31659	4.34769	2.25514	6.62767
589	11.691	31.586	22.189	23.399	22.022	12.436	18.763	20.996	9.41	11.72	11.538	15.987	24.089	9.794	10.714	11.924	22.2163	18.5542	12.1638	14.1302	8.16441	4.29977	2.75614	6.69622
590	11.413	31.258	22.447	23.397	21.334	12.158	17.933	21.046	9.786	11.784	11.28	15.333	23.771	9.446	10.881	11.986	22.1287	18.1178	12.0457	14.021	8.16252	4.26113	2.34999	6.58265
591	12.39	32.559	23.451	23.11	22.09	12.763	18.68	21.143	9.409	12.005	12.236	16.295	23.718	9.729	11.41	11.942	22.8775	18.669	12.4863	14.1997	8.24827	4.19145	2.84431	6.41521
592	11.936	32.012	23.198	23.697	21.997	12.137	18.861	20.14	9.397	11.58	11.272	15.491	24.421	10.013	11.263	12.09	22.7108	18.2838	11.935	14.4467	8.24254	4.29533	2.55944	6.70409
593	11.769	32.354	24.043	23.59	21.472	12.357	17.888	21.747	9.603	11.721	11.568	15.873	24.038	9.425	10.688	12.311	22.939	18.366	12.1912	14.1155	8.46667	4.37474	2.63716	6.71964
594	12.052	31.909	22.973	23.474	21.653	12.629	18.482	20.657	9.46	11.575	11.613	15.54	24.283	9.783	10.65	11.064	22.602	18.3552	12.047	13.945	8.14086	4.04059	2.53671	6.91264
595	11.463	32.312	22.557	23.495	22.13	12.584	18.337	20.932	9.608	11.842	11.302	15.804	23.689	9.424	10.837	11.396	22.4567	18.4958	12.139	13.8365	8.5455	4.24724	2.62215	6.62055
596	12.098	32.481	23.295	22.885	21.719	13.1	18.671	20.833	9.481	11.723	11.992	15.688	23.929	9.448	11.032	11.443	22.6898	18.5808	12.221	13.963	8.33583	3.87161	2.57087	6.69944
597	12.4	32.832	23.345	24.485	21.558	13.399	18.229	20.605	9.626	11.896	11.381	15.632	23.555	9.905	10.798	11.688	23.2655	18.4477	12.1337	13.9865	8.3879	3.64532	2.52651	6.4204
598	12.028	32.38	22.493	23.908	21.576	11.985	18.343	20.55	9.66	11.847	11.522	15.84	23.716	9.433	10.902	11.332	22.7022	18.1135	12.2172	13.8458	8.34857	4.30258	2.60028	6.6302
599	11.97	32.896	23.154	24.122	22.093	12.272	18.954	20.546	10.094	11.504	11.389	15.222	24.131	9.571	10.77	11.632	23.0355	18.4663	12.0522	14.026	8.58039	4.32378	2.20775	6.78947
600	11.871	32.312	22.906	24.266	21.424	13	19.141	21.344	9.67	11.899	11.603	16.516	23.459	9.544	10.645	11.422	22.8387	18.7272	12.422	13.7675	8.40784	3.962	2.90279	6.50678
601	12.238	31.719	22.91	24.128	21.582	12.928	18.482	20.549	9.964	12.086	11.102	16.569	24.585	9.592	11.14	11.355	22.7488	18.3852	12.4303	14.168	8.0181	3.8597	2.8922	6.98893
602	12.35	32.149	23.704	24.565	22.123	12.337	18.859	21.212	9.528	11.836	11.895	15.998	23.455	9.57	11.013	12.044	23.192	18.6328	12.3142	14.0205	8.16342	4.41671	2.69182	6.37098
603	12.466	31.779	23.352	22.633	22.04	12.861	18.107	20.171	9.73	12.072	11.419	15.323	23.361	9.679	10.89	11.485	22.5575	18.2948	12.136	13.8537	7.90593	3.96266	2.34265	6.38256
604	12.375	32.772	23.943	23.912	21.796	12.557	19.061	21.323	9.816	12.25	11.807	16.331	23.594	10.046	11.076	11.683	23.2505	18.6842	12.551	14.0998	8.36366	4.25563	2.7333	6.36546
605	12.499	32.029	23.483	23.559	22.136	12.429	18.957	20.899	9.868	11.599	11.75	15.41	23.973	9.476	10.518	11.42	22.8925	18.6052	12.1567	13.8468	8.00611	4.32039	2.33085	6.7974
606	12.544	33.032	23.566	24.532	21.888	13.133	18.687	21.157	9.855	11.782	12.106	16.339	23.726	9.62	10.877	12.013	23.4185	18.7162	12.5205	14.059	8.40507	3.96614	2.7327	6.51835
607	12.374	32.586	23.698	23.45	21.343	12.583	19.168	21.054	9.791	11.955	11.803	16.061	23.934	9.578	10.833	11.748	23.027	18.537	12.4025	14.0232	8.27627	4.08482	2.63086	6.66678
608	12.584	32.924	23.197	24.409	21.63	12.673	18.702	21.065	9.409	11.782	11.546	15.496	24.029	9.782	11.188	11.752	23.2785	18.5175	12.0583	14.1878	8.34052	4.09755	2.5282	6.61292
609	12.42	31.881	23.105	23.256	21.429	12.604	19.277	21.032	9.817	12.116	11.08	15.6	23.753	10.073	11.119	11.847	22.6655	18.5855	12.1532	14.198	7.96738	4.09583	2.4827	6.41148
610	12.386	31.473	23.918	24.469	21.943	12.984	18.764	20.217	10.015	11.606	11.634	16.715	23.234	9.52	10.835	12.158	23.0615	18.477	12.4925	13.9368	7.90431	3.88571	2.91493	6.29103
611	12.807	32.317	23.157	23.916	22.063	11.89	18.547	20.867	10.083	11.995	11.787	15.681	23.47	9.728	10.833	11.95	23.0493	18.3418	12.3865	13.9952	7.99078	4.54209	2.35744	6.38131
612	12.384	32.523	23.879	24.66	21.654	13.125	18.602	20.315	9.623	11.903	11.742	15.879	24.004	9.335	11.016	12.1	23.3615	18.424	12.2867	14.1137	8.29443	3.74699	2.61048	6.69091
613	12.588	32.249	24.142	24.232	21.353	12.555	18.56	20.844	10.164	11.94	12.09	16.049	23.814	9.751	10.784	11.678	23.3027	18.328	12.5608	14.0068	8.09133	4.03577	2.48457	6.58541
614	12.69	32.163	23.184	24.035	21.623	13.066	18.748	21.62	9.959	12.333	11.958	15.907	23.579	9.459	11.018	12.2	23.018	18.7643	12.5392	14.064	7.98667	4.03312	2.4752	6.44189
615	12.214	33.471	23.556	25.073	21.375	12.598	18.805	20.398	10.425	11.94	11.439	16.337	23.192	9.784	10.834	11.77	23.5785	18.294	12.5353	13.895	8.74161	3.94229	2.61168	6.25086
616	13.009	33.939	23.716	24.236	22.079	12.729	19.132	21.546	9.842	12.323	11.909	16.091	23.261	9.71	10.988	11.339	23.725	18.8715	12.5412	13.8245	8.55219	4.29104	2.60346	6.32983
617	12.902	33.466	22.974	24.276	20.952	13.08	18.839	20.447	9.881	12.022	12.155	16.771	23.459	9.591	10.566	11.901	23.4045	18.3295	12.7073	13.8792	8.41588	3.61378	2.90266	6.45631
618	12.612	33.104	23.364	24.067	21.002	12.737	18.716	21.116	9.832	12.051	11.639	15.765	23.641	9.017	10.702	11.957	23.2867	18.3927	12.3218	13.8293	8.38537	3.92922	2.4896	6.65115
619	12.666	33.595	24.034	24.973	21.654	12.487	18.722	21.416	10.268	12.138	12.034	16.043	23.516	9.705	10.525	11.917	23.817	18.5697	12.6207	13.9157	8.58948	4.26758	2.43752	6.46497
620	12.842	33.297	23.637	25.004	21.873	13.178	19.337	20.75	10.083	12.947	11.622	16.649	23.026	10.308	11.06	12.21	23.695	18.7845	12.8253	14.151	8.40045	3.87901	2.80497	5.96814
621	12.578	33.421	24.025	24.551	21.685	11.502	18.669	20.542	10.383	12.156	11.945	16.718	23.811	9.817	11.159	11.997	23.6438	18.0995	12.8005	14.196	8.54427	4.57067	2.72876	6.47258
622	12.977	33.128	24.03	24.107	21.357	12.054	18.981	20.89	10.128	12.269	12.203	15.825	23.912	9.623	10.903	11.869	23.5605	18.3205	12.6062	14.0767	8.24756	4.30225	2.36491	6.62105
623	13.024	34.198	24.227	24.709	21.525	12.813	18.854	20.64	10.048	12.527	11.564	16.633	23.223	9.331	10.982	12.471	24.0395	18.458	12.693	14.0018	8.66063	3.92388	2.81791	6.27985
624	12.622	32.721	23.723	24.031	21.697	13.289	19.123	20.528	10.569	12.226	11.714	16.762	23.8	9.829	10.583	12.039	23.2743	18.6593	12.8178	14.0628	8.23581	3.73161	2.71922	6.55599
625	12.813	34.373	23.81	24.197	21.329	13.34	19.265	21.111	10.495	12.603	11.81	16.566	23.313	9.71	10.855	11.804	23.7982	18.7613	12.8685	13.9205	8.80644	3.73088	2.6138	6.31992
626	12.77	32.862	23.63	23.928	21.194	12.655	19.092	20.757	10.234	12.665	11.805	15.999	23.433	9.981	10.783	11.949	23.2975	18.4245	12.6758	14.0365	8.22225	3.95151	2.43341	6.31623
627	13.195	33.705	23.787	24.841	22.055	12.754	18.302	20.44	10.459	12.578	12.328	16.256	23.499	9.939	10.96	12.227	23.882	18.3878	12.9052	14.1562	8.39905	4.0582	2.42569	6.29842
628	13.157	33.189	23.739	24.531	21.589	12.832	18.448	20.729	10.218	12.663	11.45	16.074	23.781	9.344	10.732	11.358	23.654	18.3995	12.6013	13.8038	8.20324	3.94119	2.52118	6.70453
629	13.505	33.611	24.76	24.572	21.797	13.001	19.305	20.956	10.779	12.588	11.951	17.089	23.958	9.866	11.41	12.231	24.112	18.7647	13.1017	14.3662	8.23349	3.97948	2.76173	6.46923
630	13.322	33.202	24.043	25.34	21.876	12.876	19.298	20.927	10.742	12.851	12.36	16.498	24.438	10.026	11.526	12.211	23.9768	18.7443	13.1128	14.5502	8.175	4.05443	2.43006	6.65469
631	13.68	33.641	23.958	25.133	21.025	12.347	18.772	20.573	10.918	12.678	11.831	16.139	23.888	9.37	10.887	12.159	24.103	18.1792	12.8915	14.076	8.17913	4.00811	2.28117	6.63994
632	13.587	34.17	24.228	24.933	21.538	13.596	18.771	21.374	10.789	12.913	11.971	16.293	23.901	9.731	10.894	12.137	24.2295	18.8197	12.9915	14.1657	8.41767	3.70599	2.36633	6.5641
633	13.388	32.865	24.424	25.134	21.401	13.127	18.933	20.606	10.684	12.845	12.143	16.299	23.631	9.535	11.353	12.149	23.9527	18.5168	12.9927	14.167	8.01373	3.73749	2.38086	6.40348
634	13.35	32.858	24.021	24.945	21.599	13.162	18.834	21.122	10.771	13.125	12.05	17.048	24.447	9.803	11.024	12.144	23.7935	18.6792	13.2485	14.3545	8.01269	3.87109	2.7096	6.79591
635	13.548	33.155	23.779	25.481	21.83	12.985	19.114	20.611	11.215	12.976	12.098	16.766	23.944	9.811	10.846	12.039	23.9907	18.635	13.2637	14.16	8.06846	3.92702	2.44301	6.58589
636	14.055	34.272	24.225	25	21.778	12.753	19.636	20.443	10.655	13.114	12.241	16.472	24.03	9.703	10.595	12.595	24.388	18.6525	13.1205	14.2308	8.26368	4.03096	2.45525	6.6438
637	14.065	33.434	24.448	25.877	21.695	12.891	18.638	20.479	10.939	13.388	11.904	16.749	24.124	9.911	11.077	12.002	24.456	18.4258	13.245	14.2785	7.97071	3.89796	2.54391	6.61919
638	13.941	34.229	24.732	24.764	21.861	13.046	18.865	20.959	11.336	12.962	12.29	16.659	24.093	9.62	11.173	12.022	24.4165	18.6827	13.3117	14.227	8.29139	3.96185	2.32909	6.6521
639	13.604	33.668	24.654	25.307	21.522	13.203	18.904	20.64	10.918	13.317	11.903	17.073	24.038	9.748	10.865	12.231	24.3083	18.5672	13.3027	14.2205	8.23211	3.73789	2.69946	6.62329
640	14.518	33.999	24.368	25.189	22.098	13.577	18.924	20.937	11.525	13.313	12.129	17.136	23.912	9.548	11.406	12.144	24.5185	18.884	13.5257	14.2525	7.9658	3.77317	2.5188	6.53163
641	14.047	33.344	25.311	25.422	22.15	13.436	19.19	20.784	11.841	14.037	12.086	16.56	23.859	9.816	11.06	12.416	24.531	18.89	13.631	14.2878	7.93695	3.83193	2.18594	6.46857
642	14.022	33.201	24.304	25.29	21.807	13.513	19.513	20.707	11.273	13.702	11.753	17.094	24.559	10.084	11.633	11.937	24.2043	18.885	13.4555	14.5532	7.86995	3.70183	2.64331	6.71967
643	14.19	33.681	23.683	25.526	21.554	13.114	19.067	20.421	11.653	13.604	12.471	16.359	24.617	10.043	11.318	12.135	24.27	18.539	13.5217	14.5282	8.00199	3.75684	2.0537	6.7807
644	14.682	34.522	24.947	26.282	21.576	13.418	19.59	21.218	12.124	13.314	11.875	17.18	24.373	9.621	11.15	12.294	25.1082	18.9505	13.6233	14.3595	8.13898	3.78824	2.45291	6.76488
645	14.267	33.937	24.474	25.655	21.169	12.682	19.136	20.802	12.356	13.734	12.003	16.241	24.984	9.739	11.279	12.164	24.5832	18.4472	13.5835	14.5415	8.06387	3.94399	1.92265	7.0334
646	14.601	34.268	24.442	25.534	21.282	13.231	19.537	20.645	11.881	13.292	11.984	17.5	24.251	10.012	10.877	12.237	24.7112	18.6737	13.6643	14.3443	8.04773	3.69944	2.63659	6.66769
647	14.81	33.998	24.931	25.401	21.676	13.268	19.092	20.373	12.469	13.641	11.82	16.999	24.311	9.745	11.23	12.149	24.785	18.6023	13.7323	14.3588	7.84816	3.70934	2.30452	6.70835
648	14.662	34.317	25.201	25.201	21.622	13.56	18.626	20.823	11.923	13.512	11.722	16.609	24.556	9.392	10.765	12.723	24.8453	18.6578	13.4415	14.359	8.03463	3.6269	2.25836	6.93405
649	14.627	33.968	24.147	25.803	21.777	13.548	19.427	20.785	11.818	13.933	12.053	16.496	24.62	9.806	11.236	11.643	24.6363	18.8843	13.575	14.3263	7.93447	3.6856	2.16517	6.90757
650	15.221	33.728	24.618	25.407	21.739	13.633	19.635	21.164	12.546	13.693	12.195	16.708	24.585	9.756	11.062	12.235	24.7435	19.0428	13.7855	14.4095	7.56869	3.71419	2.05066	6.85882
651	15.315	35.526	24.63	27.304	21.903	13.785	19.731	21.342	12.677	14.168	12.647	17.406	24.423	10.196	11.055	13.054	25.6938	19.1902	14.2245	14.682	8.32899	3.71924	2.23669	6.60345
652	14.978	34.312	24.553	26.046	21.843	13.515	19.534	20.535	13.297	13.987	12.096	17.418	25.206	9.992	11.208	12.924	24.9723	18.8568	14.1995	14.8325	7.92558	3.68452	2.2835	7.01948
653	15.523	34.426	23.978	26.335	21.448	13.81	19.957	20.864	12.972	14.34	12.118	17.04	24.847	9.824	11.635	12.063	25.0655	19.0198	14.1175	14.5922	7.77759	3.52692	2.15257	6.90504
654	15.259	34.824	25.475	26.972	21.147	14.125	19.993	21.154	12.669	14.383	11.826	17.807	24.169	9.939	11.31	12.477	25.6325	19.1047	14.1713	14.4738	8.03974	3.36438	2.64704	6.5462
655	15.221	34.735	24.559	26.024	22.173	13.5	19.455	20.384	13.459	14.376	11.976	17.076	24.789	10.167	10.964	12.02	25.1348	18.878	14.2218	14.485	7.99103	3.75858	2.14443	6.91113
656	15.53	34.998	24.439	26.304	21.802	13.215	19.523	20.708	12.976	14.488	11.69	16.835	25.129	9.795	11.015	12.393	25.3178	18.812	13.9972	14.583	7.98441	3.84564	2.21058	7.11032
657	15.655	34.033	24.938	26.937	21.472	13.393	20.39	21.173	13.19	14.5	12.39	17.674	25.171	9.586	11.256	12.81	25.3908	19.107	14.4385	14.7058	7.5734	3.83656	2.32575	7.09995
658	15.654	35.094	25.514	26.703	21.812	14.507	19.857	21.454	12.934	14.548	12.336	17.802	24.876	9.695	10.968	12.944	25.7413	19.4075	14.405	14.6208	7.96248	3.37573	2.44981	6.96628
659	15.66	34.485	24.777	27.035	21.348	14.141	19.771	20.9	13.672	14.318	12.291	16.467	25.358	9.629	11.22	11.731	25.4892	19.04	14.187	14.4845	7.75531	3.33272	1.73931	7.30405
660	16.19	33.908	24.899	26.065	21.803	13.624	19.236	21.062	13.816	14.871	12.263	17.039	25.676	10.221	11.195	12.948	25.2655	18.9312	14.4973	15.01	7.2533	3.69896	2.00467	7.19963
661	16.033	34.54	25.922	27.663	22.046	13.995	20.303	22.113	14.144	15.219	12.249	17.873	25.516	10.389	11.382	12.806	26.0395	19.6142	14.8712	15.0232	7.63846	3.83873	2.3478	7.06515
662	16.096	35.29	24.601	26.586	22.108	13.573	19.613	20.954	13.737	14.866	11.791	16.763	25	10.253	11.6	11.995	25.6432	19.062	14.2893	14.712	7.87792	3.79871	2.08153	6.89909
663	15.709	33.808	24.213	26.691	21.548	13.48	19.658	20.395	14.138	14.922	12.37	16.343	25.497	9.776	11.057	12.19	25.1052	18.7703	14.4432	14.63	7.46856	3.61158	1.65628	7.31147
664	16.49	34.02	24.877	26.937	21.79	14.167	19.53	21.335	14.453	15.496	12.344	17.3	25.225	10.228	11.35	12.651	25.581	19.2055	14.8983	14.8635	7.21566	3.49791	2.06947	6.97826
665	16.085	34.525	24.794	26.874	21.077	14.409	19.12	20.426	14.552	14.784	12.32	17.022	26.283	10.101	10.997	12.139	25.5695	18.758	14.6695	14.88	7.58199	3.01136	1.92192	7.64761
666	16.171	34.052	25.038	27.193	21.656	13.802	19.035	20.489	14.95	14.831	12.364	17.017	25.67	10.398	11.376	12.314	25.6135	18.7455	14.7905	14.9395	7.37553	3.46568	1.90371	7.19631
667	16.753	34.357	24.461	26.956	21.867	14.225	19.861	21.066	15.028	15.225	12.053	17.298	25.834	10.143	10.769	12.29	25.6318	19.2548	14.901	14.759	7.25917	3.45304	2.15853	7.43817
668	16.934	33.95	24.872	27.201	21.291	13.429	19.716	20.966	15.458	14.9	12.364	16.924	25.959	10.126	11.325	12.847	25.7392	18.8505	14.9115	15.0642	7.01992	3.67755	1.90076	7.34802
669	16.32	35.711	24.348	27.197	21.145	14.177	19.289	20.998	15.163	15.005	12.471	16.474	25.353	9.65	11.007	12.347	25.894	18.9023	14.7782	14.5892	8.00256	3.26086	1.67316	7.25981
670	16.677	34.435	25.751	27.369	21.422	14.22	20.566	21.058	15.463	15.391	12.311	17.244	25.682	10.344	11.381	12.427	26.058	19.3165	15.1022	14.9585	7.30275	3.41572	2.04871	7.1994
671	16.645	35.164	25.057	27.145	21.576	14.775	20.53	21.267	15.21	15.346	12.561	18.038	26.172	10.051	11.085	13.09	26.0027	19.537	15.2888	15.0995	7.6091	3.20485	2.2367	7.4887
672	17.241	34.958	24.576	26.942	21.519	14.707	19.686	20.745	15.936	15.921	12.211	17.232	25.982	9.996	11.054	12.218	25.9293	19.1642	15.325	14.8125	7.29979	3.06501	2.16504	7.50143
673	17.265	34.422	24.924	27.281	21.492	14.283	20.104	20.907	15.905	15.61	12.009	17.015	25.006	10.231	11.338	11.998	25.973	19.1965	15.1348	14.6433	7.07168	3.32471	2.16985	6.94686
674	17.032	35.563	24.327	27.858	21.463	14.018	19.922	20.207	15.664	15.552	12.524	16.997	25.991	10.063	11.288	12.591	26.195	18.9025	15.1843	14.9832	7.70227	3.32443	1.89107	7.41074
675	16.612	34.79	24.532	26.744	21.465	14.362	20.125	21.285	16.728	15.514	12.209	16.806	25.762	10.046	11.353	12.881	25.6695	19.3092	15.3143	15.0105	7.47597	3.3512	2.15302	7.2607
676	16.707	35.9	24.322	27.966	21.735	13.929	20.786	20.948	16.358	15.884	12.036	16.855	26.637	10.1	11.457	12.511	26.2238	19.3495	15.2833	15.1762	7.97601	3.63736	2.20083	7.70397
677	17.121	35.74	24.856	28.287	21.702	14.511	19.738	20.887	16.052	15.763	12.361	17.241	25.887	10.273	11.62	12.608	26.501	19.2095	15.3543	15.097	7.72958	3.23428	2.0955	7.25671
678	17.795	34.355	23.996	28.136	21.602	14.068	20.448	20.842	16.607	16.102	12.193	17.348	25.661	10.42	11.273	12.276	26.0705	19.24	15.5625	14.9075	6.96866	3.48111	2.30388	7.20902
679	17.053	34.366	24.91	27.738	21.661	14.805	21.254	20.425	17.335	15.844	12.079	17.399	26.179	9.787	10.745	12.968	26.0167	19.5362	15.6643	14.9198	7.17046	3.19582	2.4958	7.62351
680	17.131	35.634	25.419	27.701	21.207	14.909	20.265	20.854	16.442	16.05	12.077	17.707	25.67	10.256	11.11	13.179	26.4712	19.3087	15.569	15.0538	7.61174	2.95879	2.43301	7.18311
681	16.905	35.45	24.935	27.73	21.24	14.809	20.733	20.937	16.865	15.784	12.055	16.883	25.883	10.065	11.243	12.903	26.255	19.4297	15.3968	15.0235	7.65699	3.08753	2.28633	7.33267
682	16.821	36.26	24.814	28.095	20.856	14.877	20.433	21.122	17.053	15.65	11.848	17.767	26.281	9.819	11.489	12.901	26.4975	19.322	15.5795	15.1225	8.04834	2.97688	2.63852	7.5449
683	17.677	34.817	25.097	27.583	21.646	14.654	20.33	20.571	17.414	16.141	12.627	17.028	25.946	10.439	11.125	13.04	26.2935	19.3002	15.8025	15.1375	7.0708	3.14989	2.18305	7.28924
684	17.678	35.237	25.95	28.028	21.434	15.128	21.063	21.625	17.425	16.093	12.231	17.525	26.253	9.884	11.234	12.657	26.7233	19.8125	15.8185	15.007	7.22497	3.1317	2.47915	7.58234
685	17.655	34.812	25.466	27.712	20.646	14.77	20.48	21.488	17.732	16.035	12.175	17.358	26.123	10.114	11.604	12.809	26.4112	19.346	15.825	15.1625	7.06706	3.08242	2.5399	7.38967
686	17.286	35.703	25.386	28.226	21.148	14.239	21.001	21.213	17.555	15.92	12.594	17.697	26.055	10.419	11.453	12.5	26.6502	19.4002	15.9415	15.1068	7.6097	3.44198	2.37286	7.34811
687	18.142	34.605	26.23	27.928	21.511	14.021	20.736	20.622	17.816	16.42	12.27	17.226	26.501	10.011	11.281	12.285	26.7263	19.2225	15.933	15.0195	6.76891	3.49009	2.50814	7.71068
688	16.501	34.952	25.358	28.317	20.926	14.874	20.774	20.735	17.686	16.018	12.391	17.718	25.774	10.215	11.146	12.573	26.282	19.3272	15.9533	14.927	7.65576	2.96998	2.50404	7.29606
689	18.264	35.121	25.475	29.077	21.409	14.609	20.953	21.753	17.782	16.618	12.497	17.25	26.698	10.278	11.412	13.188	26.9843	19.681	16.0367	15.394	7.04526	3.39717	2.40732	7.63057
690	18.714	34.887	24.98	27.769	21.518	14.314	20.612	21.061	17.832	16.546	12.572	17.063	26.064	9.656	11.5	12.402	26.5875	19.3762	16.0033	14.9055	6.70457	3.39504	2.34773	7.52627
691	17.763	34.976	24.565	27.138	20.792	13.797	20.903	20.368	18.311	16.038	12.537	17.696	26.512	10.216	10.936	12.886	26.1105	18.965	16.1455	15.1375	7.11154	3.45304	2.59013	7.66643
692	18.178	35.263	24.822	29.271	21.382	14.93	21.268	21.897	18.208	16.495	12.513	17.286	26.61	10.503	10.992	13.081	26.8835	19.8693	16.1255	15.2965	7.20999	3.30418	2.508	7.62474
693	18.118	35.919	26.364	29.051	20.821	16.101	21.535	21.071	18.498	16.291	12.187	17.576	26.537	10.285	11.361	13.616	27.363	19.882	16.138	15.4498	7.36031	2.53797	2.78515	7.52069
694	18.114	35.046	25.521	27.685	21.549	15.389	20.91	21.759	18.422	16.998	12.473	17.412	26.048	10.001	11.079	12.7	26.5915	19.9017	16.3263	14.957	6.9687	3.03009	2.63754	7.47675
695	18.438	34.836	24.478	28.633	22.369	14.554	21.232	21.976	18.666	17.055	12.645	17.221	25.88	10.266	11.585	12.963	26.5963	20.0328	16.3968	15.1735	6.90618	3.68281	2.6037	7.2221
696	18.453	35.869	25.166	28.055	20.962	15.461	20.781	20.948	18.556	16.307	12.237	17.02	26.013	10.286	11.209	13.57	26.8858	19.538	16.03	15.2695	7.21422	2.71924	2.69718	7.29461
697	18.94	35.38	24.782	28.868	21.642	14.33	21.381	20.925	18.984	16.654	12.003	18.125	26.484	10.288	11.691	13.708	26.9925	19.5695	16.4415	15.5428	6.9185	3.50554	3.11148	7.428
698	18.933	35.518	25.842	28.862	21.19	15.941	21.775	22.083	18.935	16.701	11.9	16.619	26.588	10.217	11.574	13.127	27.2888	20.2473	16.0388	15.3765	6.88252	2.89463	2.96045	7.5683
699	18.991	36.42	25.453	28.59	22.099	15.255	22.018	20.888	19.279	16.291	12.683	17.303	24.986	10.444	11.484	13.612	27.3635	20.065	16.389	15.1315	7.24047	3.25396	2.76475	6.70067
700	18.665	35.756	25.199	28.316	21.592	15.825	21.221	21.888	18.273	17.287	12.571	17.093	25.735	10.28	11.379	13.782	26.984	20.1315	16.306	15.294	7.09728	2.88394	2.54303	7.11262
701	19.19	36.58	25.138	27.882	21.361	15.781	22.012	21.757	19.177	16.514	12.079	16.652	25.933	10.747	11.812	13.271	27.1975	20.2278	16.1055	15.4407	7.23099	2.97657	2.95027	7.07093
702	19.236	36.411	25.909	28.771	21.846	16.204	22.746	21.347	18.457	16.828	12.12	17.431	26.671	10.465	11.434	13.471	27.5818	20.5358	16.209	15.5102	7.11383	2.94529	2.80772	7.54522
703	18.642	35.112	24.442	28.649	21.667	15.615	21.622	21.405	18.627	16.048	12.151	16.959	26.283	10.121	11.358	13.403	26.7112	20.0772	15.9462	15.2912	6.94238	2.97703	2.74629	7.45176
704	19.318	36.855	24.423	28.245	22.412	15.682	21.722	20.426	20.105	17.173	12.512	16.604	26.367	10.793	12.045	12.607	27.2103	20.0605	16.5985	15.453	7.39703	3.03287	3.12651	7.3154
705	19.582	35.461	25.226	27.999	21.38	16.223	21.087	21.638	19.351	16.899	12.529	16.795	25.839	10.455	12.363	12.591	27.067	20.082	16.3935	15.312	6.60157	2.5825	2.83419	7.08305
706	19.518	37.304	25.573	29.135	22.165	15.884	21.647	22.328	18.484	17.66	12.42	17.2	26.266	11.034	12.476	13.569	27.8825	20.506	16.441	15.8362	7.43039	3.09498	2.73278	7.03024
707	19.674	35.802	26.554	29.181	22.389	15.758	22.11	21.773	18.855	17.321	13.019	17.621	25.906	10.944	12.364	12.75	27.8027	20.5075	16.704	15.491	6.67142	3.17633	2.54477	6.98662
708	19.944	36.687	26.514	29.096	21.618	16.028	22.752	20.815	19.374	17.406	12.385	17.164	26.783	10.572	11.98	13.045	28.0602	20.3032	16.5823	15.595	6.92238	2.95886	2.96804	7.52712
709	19.72	36.171	26.914	28.559	22.309	16.261	22.342	21.104	19.556	16.65	12.717	17.815	26.128	10.468	12.491	13.108	27.841	20.504	16.6845	15.5488	6.75066	2.88671	2.90206	7.1424
710	19.616	35.135	25.923	28.288	22.159	15.811	21.734	20.991	19.023	17.33	12.415	16.644	25.678	11.335	12.273	12.613	27.2405	20.1737	16.353	15.4748	6.41065	2.94828	2.80927	6.8236
711	19.697	36.893	25.737	28.254	22.005	16.372	22.086	21.565	19.002	17.417	12.305	16.644	26.007	10.875	12.263	13.265	27.6453	20.507	16.342	15.6025	7.1346	2.76615	2.86472	7.00521
712	19.622	36.788	25.166	29.215	21.954	16.358	22.855	21.231	19.365	17.077	12.529	17.639	26.494	10.927	12.071	13.452	27.6977	20.5995	16.6525	15.736	7.22408	2.90466	2.91629	7.24592
713	20.141	35.58	24.886	28.176	22.098	16.568	21.824	22.006	19.348	17.983	12.977	17.253	25.812	11.006	12.746	12.591	27.1958	20.624	16.8903	15.5388	6.49002	2.7064	2.74953	6.89382
714	20.07	36.017	24.908	29.025	22.564	16.145	22.654	20.308	19.029	17.387	12.297	16.651	25.21	10.731	12.239	12.695	27.505	20.4177	16.341	15.2188	6.75249	3.04826	2.87341	6.7135
715	20.616	36.471	26.249	29.417	22.793	17.253	22.525	21.994	19.052	17.48	12.689	17.877	25.24	10.337	12.732	13.344	28.1883	21.1412	16.7745	15.4132	6.61346	2.61334	2.80426	6.67843
716	19.314	35.886	25.413	27.74	21.235	15.965	22.783	21.527	18.803	17.51	12.275	17.245	25.116	10.691	12.788	12.869	27.0882	20.3775	16.4582	15.366	6.85737	3.01735	2.87069	6.57772
717	20.021	35.738	24.419	28.453	22.725	15.449	22.876	21.666	18.793	17.612	12.441	16.516	25.257	11.259	12.736	12.672	27.1578	20.679	16.3405	15.481	6.67663	3.52798	2.76094	6.55289
718	20.138	36.046	25.926	29.205	22.189	17.716	22.387	22.199	19.687	16.889	12.726	17.622	26.142	11.109	12.756	13.517	27.8287	21.1227	16.731	15.881	6.63791	2.27299	2.921	6.9141
719	20.049	36.703	26.403	28.806	22.28	17.008	22.098	22.265	18.669	17.241	12.384	16.603	24.691	10.442	12.293	12.988	27.9902	20.9127	16.2242	15.1035	6.8838	2.60447	2.70195	6.48136
720	20.234	36.485	25.527	28.727	22.277	16.412	22.788	21.794	19.361	17.56	12.736	17.309	25.288	10.969	13.597	14.133	27.7433	20.8178	16.7415	15.9967	6.79918	2.96507	2.8224	6.3466
721	19.843	35.813	25.704	28.497	21.771	17.326	22.912	21.132	18.423	17.574	12.853	16.683	24.617	10.816	13.1	14.063	27.4643	20.7853	16.3833	15.649	6.632	2.42084	2.45839	6.13177
722	20.618	36.096	26.54	29.43	22.006	17.744	23.067	21.901	18.843	17.623	12.477	17.643	25.426	11.026	13.022	14.068	28.171	21.1795	16.6465	15.8855	6.43166	2.35011	2.8376	6.48431
723	20.299	36.658	24.67	29.023	22.814	16.314	22.805	21.587	18.071	17.563	12.925	17.881	25.293	10.928	12.799	13.803	27.6625	20.88	16.61	15.7058	6.97486	3.09807	2.46559	6.50159
724	20.166	35.755	25.28	28.763	22.013	17.168	22.891	21.473	19.112	17.301	12.933	16.795	24.339	11.273	12.933	13.685	27.491	20.8862	16.5352	15.5575	6.54359	2.54678	2.59934	5.94042
725	19.595	35.976	25.806	29.229	21.683	16.449	23.492	21.67	18.698	16.91	12.843	16.942	25.338	11.022	12.953	13.051	27.6515	20.8235	16.3483	15.591	6.83371	3.03932	2.48168	6.56482
726	19.864	35.749	25.953	27.947	22.41	16.713	23.226	21.535	17.745	17.508	12.304	16.385	23.958	10.786	12.715	13.835	27.3783	20.971	15.9855	15.3235	6.5546	2.92144	2.525	5.89246
727	19.818	36.778	24.894	27.821	21.98	17.188	23.793	22.342	19.527	17.39	12.439	16.162	24.457	10.841	13.207	13.735	27.3278	21.3257	16.3795	15.56	7.11501	2.86758	2.97224	6.06335
728	20.048	35.81	25.057	28.28	22.524	16.268	22.891	21.481	18.526	17.572	12.572	16.646	24.446	11.278	13.275	13.145	27.2988	20.791	16.329	15.536	6.60815	3.07392	2.61963	6.00965
729	20.117	35.004	26.098	27.239	22.801	17.018	22.228	21.434	17.837	17.672	12.385	16.547	24.807	11.242	12.814	13.148	27.1145	20.8703	16.1103	15.5027	6.11713	2.62862	2.54879	6.25826
730	20.169	36.706	25.818	28.497	21.965	17.312	22.619	21.007	17.995	17.638	12.342	16.667	25.708	10.998	12.81	12.525	27.7975	20.7258	16.1605	15.5102	6.87903	2.37016	2.60678	6.84489
731	20.57	36.713	26.198	28.808	22.369	17.44	23.262	21.757	18.845	17.147	12.259	16.713	24.537	11.145	12.323	13.25	28.0722	21.207	16.241	15.3138	6.70822	2.58625	2.80955	6.20888
732	20.032	35.22	25.695	28.452	21.323	17.179	22.225	21.462	17.867	18.024	12.637	16.835	24.011	11.092	12.972	13.561	27.3498	20.5472	16.3407	15.409	6.30987	2.28024	2.52486	5.83052
733	19.104	36.991	26.469	28.604	22.18	18.106	23.38	21.271	18.76	16.943	12.62	16.775	24.733	10.727	12.589	13.435	27.792	21.2342	16.2745	15.371	7.36009	2.25728	2.59682	6.34301
734	19.051	36.066	25.349	27.135	22.226	17.054	22.315	21.458	18.242	16.913	12.92	16.1	24.749	11.223	12.889	12.699	26.9003	20.7632	16.0438	15.39	7.02574	2.50258	2.26192	6.28361
735	19.327	35.236	25.101	28.446	22.077	16.549	22.409	21.806	18.544	17.395	12.508	16.7	24.683	11.219	12.712	12.827	27.0275	20.7103	16.2868	15.3603	6.64331	2.7851	2.63142	6.25817
736	20.126	36.304	26.682	29.144	21.874	17.543	23.712	22.417	17.753	17.181	12.22	17.441	24.64	10.425	13.244	12.897	28.064	21.3865	16.1487	15.3015	6.68296	2.67582	2.62958	6.35093
737	20.263	37.609	26.526	27.895	22.599	16.737	22.516	20.772	18.101	18.04	12.768	15.915	24.768	11.016	13.482	13.474	28.0732	20.656	16.206	15.685	7.17301	2.74511	2.50726	6.16555
738	19.831	37.429	25.552	28.707	22.038	16.701	23.294	21.601	17.682	18.079	13.031	16.008	24.864	10.581	13.145	14.11	27.8798	20.9085	16.2	15.675	7.35013	2.89534	2.29539	6.30441
739	19.658	37.368	25.983	28.682	21.84	17.656	23.362	21.922	17.878	17.524	12.508	16.371	24.117	10.798	12.557	14.007	27.9228	21.195	16.0702	15.3697	7.34525	2.46069	2.46045	5.97729
740	19.669	36.729	25.842	27.838	22.703	17.081	23.302	21.903	17.676	17.717	13.402	15.915	23.377	11.483	12.664	13.167	27.5195	21.2473	16.1775	15.1728	7.05598	2.83601	2.03207	5.51485
741	20.007	36.199	25.846	27.989	22.115	17.351	23.341	20.991	17.391	17.549	12.004	16.241	24.149	11.058	13.316	13.504	27.5103	20.9495	15.7962	15.5068	6.70304	2.58383	2.5945	5.86772
742	19.555	36.291	26.563	28.171	22.139	16.316	23.268	20.908	17.761	16.678	12.394	16.239	23.834	11.086	12.917	13.463	27.645	20.6578	15.768	15.325	6.87141	3.05073	2.33851	5.76303
743	19.936	37.235	25.529	28.395	22.259	17.734	24.591	21.913	18.406	17.564	12.533	16.528	24.246	11.982	13.686	14.412	27.7737	21.6242	16.2578	16.0815	7.21966	2.85318	2.59923	5.53747
744	19.821	36.873	26.387	27.813	21.525	17.248	23.64	21.342	17.399	17.124	12.177	15.742	23.705	10.506	12.905	13.867	27.7235	20.9387	15.6105	15.2458	7.02275	2.67237	2.40109	5.8139
745	19.269	37.398	25.996	28.609	21.842	17.102	23.331	21.826	17.818	17.186	12.563	16.205	24.48	10.684	13.258	12.8	27.818	21.0252	15.943	15.3055	7.50127	2.70904	2.34902	6.21824
746	19.946	36.742	26.245	29.437	21.945	16.64	23.972	22.105	17.784	17.116	12.794	16.18	23.376	10.863	12.794	13.772	28.0925	21.1655	15.9685	15.2012	6.98571	3.1542	2.21623	5.58225
747	20.538	37.242	27.639	28.509	22.701	18.662	23.885	22.579	17.287	17.439	12.755	16.948	24.61	10.967	13.505	13.275	28.482	21.9567	16.1073	15.5892	6.84485	2.2741	2.24424	6.12206
748	19.004	36.75	26.445	27.972	21.663	17.148	23.773	21.865	17.267	16.972	12.364	15.322	23.069	10.501	13.093	12.459	27.5428	21.1122	15.4813	14.7805	7.28178	2.80861	2.24751	5.63472
749	19.718	37.672	25.75	28.696	21.93	17.279	23.506	22.384	16.897	17.628	13.308	16.41	23.782	11.009	13.796	13.268	27.959	21.2748	16.0607	15.4637	7.47617	2.74495	1.90221	5.6757
750	19.6	37.274	25.673	28.449	22.466	18.346	24.757	21.399	17.367	18.132	12.507	15.737	24.112	10.95	13.338	13.711	27.749	21.742	15.9358	15.5277	7.34692	2.66238	2.49452	5.85209
751	19.576	38.297	26.328	28.407	21.609	17.561	24.333	22.366	17.483	17.613	12.202	16.859	23.286	11.211	13.475	13.543	28.152	21.4672	16.0393	15.3788	7.74297	2.846	2.57925	5.38173
752	19.875	37.535	25.436	28.588	21.734	17.952	23.073	22.622	17.165	17.551	12.315	16.263	23.321	11.171	14.013	14.378	27.8585	21.3453	15.8235	15.7208	7.38854	2.32956	2.40046	5.26572
753	19.067	36.338	26.644	28.43	21.489	17.971	23.866	22.336	16.93	17.549	12.416	16.383	23.169	10.464	13.157	13.435	27.6198	21.4155	15.8195	15.0563	7.0891	2.49815	2.31846	5.57199
754	19.157	36.775	25.815	27.517	21.491	16.816	24.517	22.296	17.803	17.637	12.482	16.066	23.258	10.474	13.061	12.893	27.316	21.28	15.997	14.9215	7.26488	3.23946	2.47057	5.68195
755	19.516	35.992	24.352	26.917	21.753	17.475	23.309	21.561	17.121	17.952	12.204	16.122	22.954	10.949	13.005	13.191	26.6943	21.0245	15.8498	15.0248	6.91643	2.49242	2.54304	5.3829
756	19.69	37.393	25.715	27.75	22.087	17.871	24.27	21.94	17.333	17.183	12.26	15.453	23.011	10.878	13.459	14.067	27.637	21.542	15.5572	15.3537	7.3494	2.66919	2.3579	5.28872
757	19.485	37.102	26.266	28.563	22.661	18.11	23.38	21.996	17.395	17.926	11.405	16.667	22.795	10.635	13.641	13.516	27.854	21.5367	15.8483	15.1467	7.27072	2.35337	3.00679	5.28451
758	19.315	37.085	26.274	28.614	22.214	17.891	24.23	21.919	16.559	18.43	12.858	17.387	22.838	10.956	13.611	14.366	27.822	21.5635	16.3085	15.4428	7.33021	2.655	2.42436	5.14248
759	19.863	37.636	28.364	28.667	21.899	18.303	24.727	22.667	17.044	17.466	12.671	17.212	23.362	10.731	13.946	15.394	28.6325	21.899	16.0983	15.8582	7.25811	2.67822	2.29141	5.36865
760	19.758	37.183	26.086	27.955	21.563	17.159	24.035	20.989	17.25	17.896	12.903	15.44	23.814	10.829	13.748	12.726	27.7455	20.9365	15.8722	15.2792	7.20334	2.84403	2.23585	5.81694
761	19.544	37.063	26.671	28.142	21.191	17.535	23.85	22.226	16.815	17.439	11.83	16.309	23.28	10.758	13.323	13.795	27.855	21.2005	15.5983	15.289	7.19593	2.67753	2.55432	5.49191
762	19.492	37.411	27.149	27.858	22.07	17.473	24.684	22.404	16.365	17.433	12.219	16.795	23.066	10.852	13.335	13.652	27.9775	21.6578	15.703	15.2263	7.34156	3.02198	2.36374	5.37435
763	19.455	37.477	26.033	28.439	22.082	17.829	24.09	21.006	17.007	17.588	11.829	15.885	22.864	10.914	13.424	13.325	27.851	21.2518	15.5772	15.1318	7.45662	2.61538	2.59688	5.28387
764	19.245	37.089	25.915	28.701	22.087	17.277	23.693	21.909	17.137	17.614	13.082	15.962	22.271	11.252	12.982	14.523	27.7375	21.2415	15.9488	15.257	7.3897	2.7621	2.03334	4.86315
765	19.519	35.831	26.364	28.307	21.824	17.649	24.075	21.912	16.258	18.136	12.164	15.799	22.883	11.082	13.747	14.608	27.5053	21.365	15.5892	15.58	6.70929	2.68717	2.4973	5.09478
766	20	35.793	26.893	27.508	22.01	18.77	24.078	22.071	16.933	18.193	12.365	15.34	23.589	10.985	13.178	13.56	27.5485	21.7323	15.7078	15.328	6.46485	2.19616	2.51575	5.62299
767	19.586	36.728	27.037	29.074	21.979	18.101	25.033	22.832	16.952	17.498	12.388	16.886	22.617	10.766	12.814	14.028	28.1062	21.9862	15.931	15.0563	7.04767	2.89213	2.37787	5.21716
768	20.432	37.889	27.591	28.368	22.051	19.301	24.352	22.215	16.292	18.169	13.351	15.997	23.25	11.005	13.87	13.277	28.57	21.9797	15.9522	15.3505	7.16636	2.07072	1.98309	5.40915
769	18.731	36.83	25.943	28.657	21.617	17.538	24.322	20.516	16.965	17.871	12.446	16.181	22.549	10.89	13.265	13.6	27.5403	20.9982	15.8657	15.076	7.47665	2.8069	2.38212	5.12597
770	19.539	36.976	24.64	28.361	22.101	18.438	24.103	21.589	15.974	17.254	12.855	15.857	22.576	10.784	13.624	13.879	27.379	21.5577	15.485	15.2157	7.34925	2.34572	1.86402	5.10341
771	19.514	38.883	25.797	27.818	21.599	19.013	24.906	22.028	16.35	17.859	12.078	15.313	22.528	10.509	13.325	12.127	28.003	21.8865	15.4	14.6222	8.06925	2.41365	2.44897	5.39533
772	18.638	36.113	25.252	28.11	22.141	17.72	23.806	21.789	15.684	17.232	11.87	15.602	21.341	11.286	13.751	13.988	27.0282	21.364	15.097	15.0915	7.24003	2.5837	2.27826	4.34176
773	19.351	37.311	26.509	28.018	21.922	19.17	25.583	23.457	15.823	17.978	12.181	16.049	21.515	11.353	14.251	14.163	27.7972	22.533	15.5077	15.3205	7.38374	2.69811	2.41949	4.34344
774	18.832	36.912	26.176	28.016	21.291	18.303	25.324	22.018	16.297	18.108	11.896	15.849	23.192	11.194	14.113	13.633	27.484	21.734	15.5375	15.533	7.43277	2.8831	2.61673	5.26351
775	19.045	36.981	25.532	27.322	21.629	16.886	23.134	20.162	15.831	18.154	12.53	14.319	22.417	10.423	13.398	13.576	27.22	20.4528	15.2085	14.9535	7.41547	2.66951	2.38251	5.18158
776	19.58	37.056	26.235	29.193	22.188	18.998	24.322	21.851	16.822	17.326	12.309	15.936	22.354	10.829	13.215	13.883	28.016	21.8397	15.5982	15.0702	7.24442	2.18773	2.26686	5.02967
777	19.348	36.522	27.13	27.339	21.544	18.122	24.626	22.052	15.273	17.795	12.447	14.539	22.278	10.628	13.401	14.33	27.5847	21.586	15.0135	15.1593	7.02343	2.67456	2.20727	4.9996
778	18.549	36.981	26.073	27.562	21.585	18.49	24.792	21.572	15.596	17.188	11.875	15.582	22.018	10.357	13.371	13.193	27.2913	21.6098	15.0602	14.7348	7.56914	2.57304	2.25332	5.04801
779	19.274	37.674	26.579	29.326	21.589	18.98	24.402	20.335	16.257	18.593	12.781	15.519	22.051	11.464	14.03	14.306	28.2133	21.3265	15.7875	15.4627	7.60099	2.31061	2.3946	4.57478
780	18.801	37.172	27.168	28.967	21.092	19.863	24.037	22.49	15.701	17.138	11.815	16.589	22.558	10.984	13.41	14.538	28.027	21.8705	15.3107	15.3725	7.53595	1.79941	2.40453	5.01458
781	18.843	37.776	25.353	28.721	22.538	17.53	24.701	21.188	16.344	18.201	12.302	15.212	21.704	10.466	13.702	13.872	27.6733	21.4893	15.5147	14.936	7.88501	3.01007	2.47097	4.77639
782	17.959	36.848	25.471	27.899	21.881	19.167	25.036	21.739	15.753	17.248	12.431	16.014	23.438	10.986	13.807	13.623	27.0443	21.9558	15.3615	15.4635	7.78591	2.40261	2.05959	5.47029
783	19.312	38.099	26.801	27.642	21.485	18.026	26.216	21.316	15.034	18.429	12.509	15.759	22.19	11.101	14.419	14.223	27.9635	21.7608	15.4328	15.4833	7.7251	3.37004	2.43525	4.72248
784	19.128	36.85	25.923	28.146	22.12	17.37	24.943	22.042	16.341	17.88	12.038	15.034	21.983	10.577	13.569	13.376	27.5117	21.6188	15.3232	14.8763	7.31247	3.13756	2.47987	4.93116
785	18.9	39.032	27.005	27.685	21.298	19.667	25.34	21.483	16.326	17.583	12.036	15.242	22.149	10.602	14.175	13.729	28.1555	21.947	15.2967	15.1638	8.27662	2.40467	2.37499	4.92068
786	19.006	36.762	27.383	27.95	21.333	18.873	24.773	22.088	16.126	17.891	12.412	14.448	21.892	11.103	13.43	13.502	27.7752	21.7668	15.2192	14.9817	7.25364	2.42917	2.34065	4.73969
787	18.896	37.963	25.982	28.577	21.909	19.496	25.563	22.205	15.588	17.329	12.726	15.414	21.716	11.159	14.196	13.773	27.8545	22.2933	15.2643	15.211	7.88384	2.49475	1.90028	4.53989
788	18.552	38.051	27.03	27.997	21.817	18.794	24.787	22.003	15.373	17.747	12.541	15.739	21.883	10.932	14.009	12.606	27.9075	21.8502	15.35	14.8575	7.98319	2.44878	2.14382	4.84962
789	18.432	37.932	26.856	27.944	20.665	19.394	25.068	21.259	15.768	18.234	11.61	15.235	22.086	10.32	13.173	13.447	27.791	21.5965	15.2118	14.7565	7.986	2.44158	2.73353	5.08679
790	18.488	36.139	24.595	26.216	21.552	17.954	24.208	21.042	16.319	17.759	12.71	14.363	21.493	10.877	13.765	12.046	26.3595	21.189	15.2878	14.5452	7.31968	2.56469	2.21137	4.78129
791	19.308	37.033	26.558	25.857	21.369	19.081	24.961	21.573	14.964	18.523	12.61	15.771	22.002	10.942	15.064	13.045	27.189	21.746	15.467	15.2633	7.33	2.42284	2.43906	4.79737
792	18.806	35.793	25.785	26.099	21.095	17.896	24.49	21.625	15.77	17.562	11.692	14.521	22.058	10.398	13.209	12.873	26.6208	21.2765	14.8863	14.6345	6.98024	2.70239	2.46829	5.10527
793	18.885	35.68	25.87	27.017	22.199	17.88	24.328	20.886	15.277	18.32	11.948	15.427	20.948	11.202	14.106	14.478	26.863	21.3232	15.243	15.1835	6.88955	2.69831	2.60512	4.1126
794	18.408	36.977	26.688	27.13	21.078	19.936	25.402	22.83	15.036	17.798	11.06	14.871	21.765	9.865	13.221	14.469	27.3007	22.3115	14.6913	14.83	7.59639	2.37939	2.76821	5.01546
795	18.608	37.34	25.479	26.797	21.495	17.812	25.479	21.446	14.278	18.402	11.211	15.096	21.075	10.619	13.402	13.618	27.056	21.558	14.7467	14.6785	7.73915	3.13173	2.95545	4.47768
796	17.892	36.827	26.672	27.732	20.948	18.964	26.387	22.308	15.37	17.892	11.315	16.639	21.311	10.461	12.532	14.152	27.2807	22.1517	15.304	14.614	7.74282	3.13967	2.85169	4.71329
797	18.503	38.121	27.548	28.981	20.981	19.082	26.453	22.241	14.746	17.471	11.613	15.08	21.058	11.148	14.09	14.49	28.2882	22.1893	14.7275	15.1965	8.0304	3.12501	2.40496	4.18215
798	18.72	37.017	27.072	27.539	20.748	18.742	25.202	23.162	14.693	18.194	11.98	13.09	21.227	11.374	14.139	14.28	27.587	21.9635	14.4893	15.255	7.47922	2.81542	2.7093	4.20012
799	18.327	38.016	25.316	27.317	21.727	19.396	24.296	21.192	15.184	18.758	12.335	14.986	21.828	10.796	13.981	13.761	27.244	21.6528	15.3158	15.0915	8.15008	2.02464	2.63692	4.72
800	18.286	36.657	25.583	27.62	21.813	18.456	26.262	22.317	14.847	17.529	12.409	15.104	21.725	10.345	14.368	14.043	27.0365	22.212	14.9722	15.1203	7.56259	3.19793	2.09287	4.76627
801	18.357	37.468	26.423	27.358	20.851	19.116	25.743	22.727	13.683	18.194	12.12	14.953	20.289	10.493	13.097	13.594	27.4015	22.1092	14.7375	14.3683	7.83362	2.83599	2.57922	4.17486
802	18.219	37.241	25.772	28.481	20.521	18.493	24.164	22.387	14.353	17.671	11.836	15.15	19.711	9.616	13.644	12.907	27.4282	21.3912	14.7525	13.9695	7.85179	2.43836	2.40425	4.20922
803	17.322	38.588	26.462	26.548	21.011	20.225	25.725	23.17	14.746	16.448	11.011	14.292	20.108	10.027	13.852	14.162	27.23	22.5328	14.1242	14.5372	8.72215	2.46563	2.27353	4.16277
804	18.392	36.491	27.106	25.36	20.374	18.507	24.618	22.741	14.201	17.723	11.582	13.619	20.875	11.164	13.871	14.361	26.8373	21.56	14.2812	15.0678	7.45591	2.67541	2.55451	4.11886
805	18.821	37.047	25.208	27.348	20.962	18.567	25.819	21.363	14.969	18.182	12.816	15.247	19.92	10.954	14.012	13.718	27.106	21.6777	15.3035	14.651	7.55261	3.02424	2.20518	3.77311
806	18.35	36.177	27.557	27.646	22.061	19.071	26.396	23.001	15.022	18.95	13.014	13.488	21.237	10.788	14.298	15.141	27.4325	22.6323	15.1185	15.366	7.28055	3.01721	2.69426	4.34427
807	18.308	37.41	26.299	27.867	21.289	18.369	26.927	21.371	13.663	18.053	11.78	15.412	20.174	11.127	13.852	14.695	27.471	21.989	14.727	14.962	7.8374	3.57585	2.66761	3.79366
808	18.91	38.417	25.078	27.123	22.332	18.453	26.189	23.877	13.918	18.881	12.094	14.851	20.76	11.253	14.211	15.073	27.382	22.7127	14.936	15.3243	8.14292	3.25219	2.86842	3.97597
809	18.171	37.546	27.537	28.137	20.784	18.635	26.384	23.432	14.122	17.765	12.366	14.483	19.594	11.118	14.659	14.022	27.8477	22.3087	14.684	14.8483	7.91361	3.35115	2.25255	3.51925
810	17.9	36.898	25.379	27.168	21.233	17.256	25.103	21.432	13.942	17.428	12.651	13.171	20.343	10.852	14.656	12.299	26.8362	21.256	14.298	14.5375	7.81727	3.20577	2.15301	4.17579
811	17.609	37.372	26.091	25.905	21.545	19.266	24.513	23.352	13.647	18.017	11.254	15.413	20.139	10.525	14.14	13.695	26.7443	22.169	14.5828	14.6248	8.11445	2.28842	2.85421	4.01308
812	17.917	36.649	25.25	26.113	19.976	17.53	25.023	21.344	12.693	16.564	12.327	15.168	19.994	10.091	13.151	13.442	26.4823	20.9682	14.188	14.1695	7.71105	3.12987	2.02518	4.16836
813	16.656	39.105	26.888	26.647	21.049	19.817	25.685	21.837	14.014	17.602	11.745	14.43	19.902	10.769	13.972	13.564	27.324	22.097	14.4477	14.5518	9.18779	2.53233	2.41127	3.84041
814	17.326	38.38	26.326	25.94	22.276	19.527	27.146	22.179	14.057	18.08	11.923	15.477	20.063	11.078	14.76	14.031	26.993	22.782	14.8843	14.983	8.65387	3.17591	2.58312	3.74217
815	18.052	38.967	26.557	27.764	20.51	19.169	26.509	21.68	14.403	18.052	11.62	14.534	20.597	9.709	14.078	14.051	27.835	21.967	14.6522	14.6088	8.58811	3.19707	2.63495	4.48923
816	17.347	36.421	25.841	25.987	20.264	18.479	24.866	19.893	14.039	17.9	11.759	14.334	19.158	10.777	14.093	14.237	26.399	20.8755	14.508	14.5663	7.80727	2.76927	2.53725	3.45326
817	16.839	36.551	25.024	26.369	21.072	19.26	25.648	21.037	13.422	17.083	11.297	14.697	19.879	11.054	13.855	14.265	26.1958	21.7542	14.1247	14.7632	8.08668	2.73023	2.41997	3.69696
818	17.323	38.405	26.908	26.223	21.388	18.102	25.049	21.673	12.314	17.886	11.038	14.237	19.437	10.944	14.29	13.699	27.2147	21.553	13.8688	14.5925	8.6438	2.83861	2.98353	3.54357
819	16.667	35.908	24.797	25.703	21.326	18.979	24.32	21.221	13.083	17.886	11.226	14.163	20.402	9.35	13.133	13.257	25.7688	21.4615	14.0895	14.0355	7.88659	2.19165	2.80663	4.61544
820	16.206	38.94	26.884	27.078	21.227	19.494	25.571	23.092	14.125	17.604	11.63	14.876	19.949	10.613	14.903	14.341	27.277	22.346	14.5587	14.9515	9.28775	2.60405	2.45899	3.83721
821	17.662	37.168	26.647	25.467	19.79	19.912	26.106	21.681	13.81	17.09	11.531	14.454	20.176	9.72	14.295	14.405	26.736	21.8722	14.2212	14.649	8.01628	2.95181	2.28695	4.28282
822	18.01	37.746	27.489	27.084	20.522	19.909	26.983	22.638	13.338	17.912	11.387	14.047	20.296	10.897	13.964	13.492	27.5823	22.513	14.171	14.6623	8.06612	3.20112	2.73587	3.99054
823	17.386	36.635	25.436	25.336	20.532	18.915	25.485	21.802	12.871	17.515	11.807	15.132	19.439	10.769	13.656	13.39	26.1982	21.6835	14.3313	14.3135	7.91425	2.79619	2.53519	3.65693
824	16.487	36.93	25.785	25.127	19.583	17.579	26.14	20.567	12.275	16.39	10.166	13.83	19.566	10.427	13.522	12.614	26.0822	20.9672	13.1653	14.0323	8.3814	3.66578	2.62227	3.91118
825	17.158	36.488	24.848	24.494	21.033	17.257	25.101	20.951	13.167	18.119	12.388	13.816	20.155	11.659	14.574	14.221	25.747	21.0855	14.3725	15.1522	7.98996	3.20429	2.56498	3.57919
826	16.797	36.901	27.217	27.574	21.484	19.725	25.127	21.254	13.671	16.927	12.272	13.507	18.912	10.742	14.225	13.507	27.1223	21.8975	14.0942	14.3465	8.21478	2.29016	1.98906	3.3939
827	17.427	36.429	25.654	26.219	22.219	17.188	25.603	21.755	12.213	18.313	11.716	14.418	20.233	10.141	14.44	13.648	26.4323	21.6912	14.165	14.6155	7.78205	3.45753	3.00432	4.18507
828	16.772	34.792	26.406	28.073	19.887	18.75	25.833	21.51	12.116	17.037	12.496	14.531	20.239	11.203	13.921	14.74	26.5108	21.495	14.045	15.0258	7.43581	3.10586	2.25896	3.79005
829	17.411	35.762	25.633	25.581	20.589	19.432	26.46	21.24	12.304	16.485	11.552	13.23	19.598	9.897	13.671	13.902	26.0968	21.9302	13.3927	14.267	7.51311	3.11102	2.17273	4.0002
830	15.761	38.24	26.606	26.05	20.72	20.384	26.302	22.964	12.546	17.357	10.326	14.618	17.746	10.122	13.621	14.416	26.6642	22.5925	13.7118	13.9763	9.18803	2.72532	2.99619	3.12974
831	16.367	37.929	26.519	25.726	20.739	19.546	24.511	23.191	13.204	17.011	10.573	14.844	20.601	10.2	14.605	14.844	26.6352	21.9967	13.908	15.0625	8.82848	2.26096	2.71554	4.26521
832	17.554	38.428	26.504	25.637	21.32	18.916	24.878	20.976	12.842	17.346	11.783	13.333	19.331	10.574	15.169	14.472	27.0308	21.5225	13.826	14.8865	8.60089	2.47608	2.43417	3.58715
833	16.707	38.821	26.872	25.81	19.76	18.056	26.394	21.614	13.129	17.77	11.664	13.542	18.022	10.772	14.271	13.648	27.0525	21.456	14.0263	14.1782	9.07567	3.59839	2.62269	2.98143
834	16.965	36.158	25.937	25.629	20.953	19.158	26.554	20.339	12.33	18.385	12.268	14.022	19.296	10.679	14.397	14.997	26.1723	21.751	14.2513	14.8422	7.8494	3.2875	2.87315	3.53038
835	15.958	37.586	23.24	23.24	20.31	17.681	24.51	22.605	12.318	16.734	11.64	13.552	19.55	10.054	13.495	14.24	25.006	21.2765	13.561	14.3347	9.06201	2.94857	2.25856	3.92589
836	15.765	38.22	27.505	24.574	20.681	19.456	26.013	21.962	12.597	16.046	10.639	14.072	19.423	10.744	13.518	13.38	26.516	22.028	13.3385	14.2663	9.26134	2.84688	2.28806	3.66713
837	15.836	37.878	26.883	25.069	19.863	18.857	25.399	22.485	12.647	16.348	11.331	15.228	19.701	9.966	14.539	14.294	26.4165	21.651	13.8885	14.625	9.04335	2.92953	2.30402	3.98284
838	15.521	38.681	24.116	25.172	20.938	19.894	25.33	24.433	11.627	17.708	12.465	15.409	18.471	9.896	14.306	15.145	25.8725	22.6487	14.3022	14.4545	9.57057	2.63868	2.79025	3.53134
839	16.454	37.09	25.766	23.851	20.851	19.475	27.954	23.249	12.57	17.305	12.057	15.208	19.013	10.674	14.184	14.661	25.7903	22.8822	14.285	14.633	8.53642	3.72346	2.44114	3.4186
840	16.421	37.37	24.767	24.548	20.605	19.89	25.425	21.918	11.103	18.143	12.131	14.795	17.808	10.408	13.994	14.247	25.7765	21.9595	14.043	14.1143	8.64991	2.45825	3.14509	3.02281
841	16.058	36.298	25.746	24.972	20.56	19.116	27.735	22.044	11.641	17.76	10.564	14.309	18.367	9.642	13.719	14.199	25.7685	22.3637	13.5685	13.9817	8.28249	3.77509	3.20725	3.56745
842	15.52	37.425	27.769	26.623	19.612	20.895	27.714	22.259	11.183	16.332	10.511	13.966	18.114	10.088	13.228	16.421	26.8343	22.62	12.998	14.4627	8.96465	3.56384	2.67905	3.55103
843	16.404	37.052	25.392	25.504	20.365	19.002	27.298	22.926	11.072	17.56	10.971	12.164	18.904	10.655	13.039	13.061	26.088	22.3977	12.9417	13.9147	8.46197	3.64941	3.12586	3.51257
844	16.814	39.859	26.085	24.512	20.911	20.824	25.759	23.915	12.513	17.98	11.692	13.937	19.694	11.056	14.306	15.347	26.8175	22.8522	14.0305	15.1007	9.59171	2.41253	2.79158	3.56605
845	15.566	38.289	26.934	25.343	18.902	19.693	27.372	22.216	12.238	17.13	12.648	13.933	17.418	9.208	14.593	14.591	26.533	22.0457	13.9872	13.9525	9.31049	3.82172	2.2161	3.4321
846	15.549	36.996	24.682	26.284	20.056	18.553	24.572	22.087	11.091	16.946	11.67	14.522	17.869	11.041	13.557	14.467	25.8777	21.317	13.5572	14.2335	8.79192	2.60881	2.71161	2.82377
847	15.725	37.841	25.845	25.136	21.446	18.92	25.845	22.301	11.214	17.163	11.339	14.831	18.275	10.003	14.012	14.667	26.1367	22.128	13.6367	14.2393	9.06423	2.8637	2.88733	3.38958
848	13.409	38.708	26.493	26.982	20.37	19.598	26.221	21.716	11.813	15.398	10.425	13.626	17.523	9.568	12.826	15.309	26.398	21.9763	12.8155	13.8065	10.3376	2.96208	2.16377	3.41546
849	15.458	38.729	24.606	24.606	19.87	18.36	25.53	21.89	11.645	16.211	12.175	12.548	18.34	10.705	13.03	14.775	25.8498	21.4125	13.1448	14.2125	9.60828	3.10263	2.07747	3.21732
850	16.273	36.803	26.288	25.969	18.776	20.074	25.332	22.836	11.299	16.516	11.822	13.755	18.432	9.666	14.325	14.923	26.3332	21.7545	13.348	14.3365	8.38568	2.92482	2.36142	3.60235
851	16.193	35.101	24.877	24.932	18.962	19.683	25.752	20.776	11.746	17.315	10.48	12.794	18.247	10.165	13.88	14.543	25.2757	21.2932	13.0837	14.2088	7.73109	3.06462	2.97526	3.31055
852	16.082	37.307	25.918	26.184	20.79	19.319	25.599	21.288	11.022	16.323	11.168	13.411	18.347	9.759	13.711	14.103	26.3727	21.749	12.981	13.98	8.67371	2.69936	2.48183	3.5107
853	14.201	37.185	25.411	24.37	20.726	18.675	26.177	22.234	11.076	15.701	11.305	13.143	17.217	9.386	14.096	12.979	25.2918	21.953	12.8063	13.4195	9.40422	3.17133	2.14013	3.23222
854	14.56	37.62	27.949	25.877	20.295	18.969	26.886	22.104	10.721	16.861	10.165	13.709	17.677	10.92	12.809	13.974	26.5015	22.0635	12.864	13.845	9.46407	3.46226	3.08583	2.84779
855	15.268	36.645	26.493	25.95	19.515	18.784	25.299	21.878	11.645	16.346	9.74	13.192	18.732	9.606	14.156	14.332	26.089	21.369	12.7308	14.2065	8.73128	2.93391	2.79322	3.72662
856	15.328	36.589	26.61	24.974	19.731	18.955	26.98	23.02	10.37	16.605	10.992	13.675	17.522	9.58	13.916	15.206	25.8753	22.1715	12.9105	14.056	8.70596	3.65803	2.85006	3.33616
857	14.978	37.163	26.268	24.38	20.334	19.957	25.944	22.06	10.597	17.298	11.464	12.891	19.11	9.451	14.023	14.509	25.6972	22.0738	13.0625	14.2733	9.09994	2.73778	2.97785	3.94827
858	15.379	36.392	25.928	24.691	19.812	19.072	25.567	21.701	11.641	16.823	11.451	12.835	18.238	10.141	14.204	13.711	25.5975	21.538	13.1875	14.0735	8.59981	2.90515	2.49988	3.31442
859	14.918	36.322	28.01	24.131	20.717	20.302	25.038	21.511	11.441	17.03	10.996	14.811	17.629	10.124	13.242	14.207	25.8453	21.892	13.5695	13.8005	8.88429	2.15648	2.86762	3.09037
860	14.079	37.398	26.27	25.508	21.304	20.122	28.201	22.764	11.575	17.305	11.358	13.364	17.979	10.181	14.785	15.396	25.8137	23.0978	13.4005	14.5852	9.52542	3.56965	2.75383	3.24613
861	14.617	36.396	25.821	22.485	20.053	19.61	26.643	21.407	11.272	17.037	12.032	13.09	18.124	10.275	14.286	15.041	24.8298	21.9282	13.3577	14.4315	9.02882	3.23478	2.56363	3.23026
862	14.504	37.59	25.85	24.459	20.843	21.421	28.373	23.841	11.281	17.79	11.318	14.882	17.703	10.09	14.006	15.396	25.6008	23.6195	13.8177	14.2988	9.45596	3.42477	3.14087	3.19333
863	14.064	37.838	25.676	25.572	19.941	20.114	26.611	23.441	10.944	16.177	10.862	14.345	17.955	10.333	13.272	15.073	25.7875	22.5267	13.082	14.1582	9.70762	3.16356	2.62511	3.1974
864	14.586	36.662	26.882	26.062	21.386	20.993	26.472	22.427	10.735	16.426	11.399	14.235	17.813	9.921	13.995	14.747	26.048	22.8195	13.1987	14.119	9.03198	2.50904	2.633	3.24954
865	13.715	36.842	26.763	25.72	19.476	21.351	25.67	21.599	10.852	15.679	10.769	15.144	16.59	10.573	13.355	15.144	25.76	22.024	13.111	13.9155	9.46749	2.60891	2.66557	2.59157
866	14.835	37.936	26.62	24.177	20.827	20.09	27.019	22.134	11.156	15.924	11.535	12.961	17.863	10.125	14.226	14.955	25.892	22.5175	12.894	14.2922	9.50064	3.11775	2.16433	3.19165
867	14.177	37.286	26.013	23.816	19.956	19.668	26.794	22.645	11.17	16.577	11.904	14.056	17.236	10.641	14.872	14.446	25.323	22.2657	13.4267	14.2988	9.48848	3.30314	2.43117	2.72989
868	14.369	40.644	25.956	23.742	20.135	19.869	27.062	24.296	10.408	16.495	10.76	13.129	17.39	9.955	14.143	14.99	26.1777	22.8405	12.698	14.1195	10.8735	3.46839	2.80493	3.09826
869	13.37	38.119	26.744	24.014	19.844	20.273	28.008	22.295	9.791	15.81	10.995	14.004	16.841	9.466	13.663	14.408	25.5617	22.605	12.65	13.5945	10.1672	3.75721	2.75268	3.0687
870	14.014	38.153	26.908	25.301	20.025	18.775	27.46	20.833	9.801	17.565	10.744	12.55	16.688	9.654	14.201	15.562	26.094	21.7732	12.665	14.0262	9.87653	3.88455	3.46006	3.0871
871	13.92	39.289	26.95	24.63	19.264	21.076	27.246	24.087	9.865	16.576	11.264	14.906	17.849	10.624	14.784	15.745	26.1973	22.9183	13.1527	14.7505	10.4107	3.50442	3.11818	3.03419
872	14.842	37.143	26.489	23.293	20.843	20.194	25.666	23.971	10.131	16.821	11.171	13.898	16.689	10.788	15.289	13.22	25.4417	22.6685	13.0053	13.9965	9.21932	2.59082	2.99904	2.57018
873	15.923	36.341	25.74	23.669	20.323	18.294	27.515	22.535	10.741	16.746	11.554	11.982	18.147	10.51	14.657	14.546	25.4183	22.1668	12.7557	14.465	8.41882	3.96388	2.7095	3.1221
874	14.393	37.974	26.796	26.397	19.202	20.11	28.593	24.501	10.274	16.688	10.434	14.621	17.23	9.742	13.953	16.417	26.39	23.1015	13.0042	14.3355	9.63123	4.33091	3.17513	3.36439
875	15.076	38.837	25.989	25.061	19.925	21.69	27.553	24.231	10.492	16.941	11.75	13.825	17.348	11.968	15.449	14.802	26.2407	23.3498	13.252	14.8918	9.7429	3.31298	2.81725	2.22861
876	14.081	37.828	27.489	23.726	20.28	20.581	27.537	23.487	10.441	16.573	10.903	13.244	16.986	10.125	14.299	15.15	25.781	22.9712	12.7903	14.14	9.81768	3.36988	2.80451	2.90203
877	14.53	38.473	26.753	24.784	19.536	22.43	26.849	24.015	10.159	15.873	11.264	14.361	16.984	9.432	14.621	15.37	26.135	23.2075	12.9142	14.1018	9.81681	3.05489	2.65594	3.26558
878	13.636	39.4	26.642	24.437	18.919	20.966	27.627	23.64	9.88	16.339	10.534	13.79	16.677	10.842	14.711	15.807	26.0287	22.788	12.6357	14.5092	10.5717	3.76079	3.00321	2.57376
879	13.721	38.785	26.729	25.047	19.475	22.009	27.056	22.991	10.933	16.642	11.537	13.505	16.871	10.593	15.137	15.234	26.0705	22.8828	13.1543	14.4588	10.2575	3.15193	2.57144	2.69716
880	14.746	38.447	26.118	23.482	19.44	21.459	27.294	23.294	9.194	16.822	11.676	12.753	15.822	10.232	13.903	15.671	25.6983	22.8717	12.6113	13.907	9.79065	3.34202	3.1782	2.60029
881	14.19	37.866	26.74	22.802	19.192	21.978	27.885	23.993	10.205	16.807	11.021	13.69	16.998	10.381	13.87	15.797	25.3995	23.262	12.9307	14.2615	9.82532	3.65696	2.98209	2.89008
882	14.682	37.44	26.309	24.945	21.108	21.117	27.057	23.493	9.783	17.309	11.654	13.726	16.892	10.397	15.396	14.65	25.844	23.1937	13.118	14.3338	9.31096	2.80936	3.22489	2.78514
883	14.227	38.619	27.304	26.474	20.442	21.101	28.353	25.688	9.285	16.464	11.906	12.931	16.975	11.464	15.47	15.509	26.656	23.896	12.6465	14.8545	9.96739	3.77793	2.97222	2.36638
884	14.496	38.067	26.281	24.823	20.647	21.491	27.78	25.115	10.45	16.528	11.5	14.244	17.408	11.019	14.737	15.244	25.9168	23.7583	13.1805	14.602	9.65041	3.30835	2.74569	2.65468
885	14.217	37.913	24.917	23.639	20.613	19.761	26.898	23.391	10.722	16.823	11.986	11.716	17.214	10.911	14.566	14.191	25.1715	22.6657	12.8118	14.2205	9.74269	3.21918	2.72884	2.58419
886	13.653	37.976	26.997	23.925	19.68	21.835	28.103	24.826	9.424	16.779	11.528	14.011	17.068	10.428	14.679	16.182	25.6378	23.611	12.9355	14.5892	10.0108	3.66339	3.17495	2.94421
887	13.857	36.697	26.764	22.901	20.899	19.945	27.946	22.901	9.764	17.365	12.721	13.283	17.17	10.828	15.346	15.372	25.0547	22.9228	13.2832	14.679	9.4603	3.5682	3.12847	2.70558
888	14.665	37.557	26.286	25.303	21.248	20.537	27.95	24.168	10.248	16.851	11.496	13.729	16.928	10.759	14.91	14.977	25.9528	23.4757	13.081	14.3935	9.35602	3.37131	2.8966	2.59747
889	13.932	38.467	28.555	23.79	19.957	21.502	28.708	25.734	9.677	16.647	11.026	13.725	16.646	10.336	15.599	14.868	26.186	23.9753	12.7687	14.3623	10.2035	3.9898	3.08498	2.78158
890	13.988	37.495	27.941	24.321	20.9	20.847	27.398	23.959	9.913	17.291	11.481	13.826	17.202	10.801	15.089	14.586	25.9362	23.276	13.1278	14.4195	9.71242	3.10928	3.20763	2.66532
891	14.384	37.909	27.237	24.183	20.532	21.38	28.135	24.111	9.136	17.022	12.159	13.187	17.444	11.035	15.76	16.134	25.9282	23.5395	12.876	15.0932	9.68791	3.42314	3.25514	2.80019
892	14.414	37.983	28.356	24.947	20.266	21.539	28.426	24.526	10.169	16.466	11.422	13.844	16.738	10.439	14.545	16.058	26.425	23.6892	12.9753	14.445	9.72565	3.62763	2.78255	2.82357
893	14.222	37.664	26.283	24.441	20.628	22.467	29.342	24.638	9.141	17.596	11.702	14.441	16.963	10.826	14.884	15.855	25.6525	24.2688	13.22	14.632	9.60551	3.75835	3.63239	2.67572
894	14.38	38.93	27.002	24.311	20.922	20.389	27.65	23.793	9.66	17.034	11.87	14.003	16.466	11.129	14.956	15.592	26.1557	23.1885	13.1418	14.5358	10.099	3.32889	3.14279	2.35401
895	13.748	38.577	26.81	23.627	20.247	21.036	26.03	24.032	9.595	16.684	12.087	14.388	16.108	10.083	14.74	16.542	25.6905	22.8362	13.1885	14.3683	10.2339	2.68173	3.04324	2.95824
896	13.905	38.686	28.093	24.808	20.089	22.198	28.247	25.023	9.782	16.414	11.688	15.229	16.49	10.093	15.072	17.286	26.373	23.8892	13.2782	14.7353	10.2057	3.53919	3.07631	3.22745
897	13.488	37.634	27.98	24.702	19.87	22.318	28.069	23.927	9.394	15.908	11.774	13.29	16.833	10.307	15.108	16.061	25.951	23.546	12.5915	14.5773	9.95817	3.44595	2.73126	2.93295
898	13.885	36.776	27.667	23.695	20.782	21.425	27.667	25.624	9.403	16.946	11.894	14.983	16.846	10.511	15.526	16.657	25.5057	23.8745	13.3065	14.885	9.48701	3.317	3.33112	2.97368
899	13.748	38.915	27.542	25.569	20.031	22.582	27.843	25.295	9.328	16.959	11.734	14.525	17.012	10.797	15.136	16.525	26.4435	23.9378	13.1365	14.8675	10.3067	3.37609	3.31718	2.82768
900	13.408	38.16	27.467	24.213	20.873	21.973	26.827	24.32	9.604	16.37	12.226	14.08	16.699	10.223	14.692	15.387	25.812	23.4982	13.07	14.2503	10.192	2.64412	2.86564	2.81084
901	13.441	37.638	28.425	25.538	20.452	21.732	27.769	25.302	9.369	16.165	11.63	14.121	16.472	10.384	15.351	17.27	26.2605	23.8137	12.8213	14.8693	9.98322	3.34135	2.95562	3.09203
902	13.386	37.833	28.12	25.28	20.216	22.79	28.12	25.106	9.814	16.479	11.405	14.271	16.319	11.372	15.512	17.161	26.1547	24.058	12.9923	15.091	10.0673	3.36486	2.96722	2.56912
903	13.248	38.334	26.932	23.86	19.618	22.036	27.772	24.844	9.379	16.487	12.014	14.162	16.104	10.734	15.361	16.275	25.5935	23.5675	13.0105	14.6185	10.3203	3.52379	3.03276	2.61988
904	13.975	38.602	28.297	24.526	20.129	21.643	27.528	25.174	9.572	16.623	11.618	14.293	16.701	10.286	15.644	16.815	26.35	23.6185	13.0265	14.8615	10.1714	3.35574	3.07984	3.09556
905	13.798	38.245	28.568	24.457	20.689	22.771	28.661	24.619	9.012	17.333	11.963	13.903	17.753	11.038	15.946	16.882	26.267	24.185	13.0527	15.4047	10.1245	3.38843	3.49088	3.00322
906	12.812	38.38	28.995	24.037	19.805	21.403	27.778	24.878	9.9	16.538	11.952	14.542	16.688	10.361	15.778	16.622	26.056	23.466	13.233	14.8622	10.6458	3.57053	2.90897	3.0293
907	14.011	38.331	28.666	22.985	20.472	23.25	28.798	25.363	10.007	16.453	12.071	15.478	16.841	10.787	15.574	16.887	25.9982	24.4707	13.5023	15.0222	10.1978	3.51195	2.99309	2.8883
908	13.066	38.297	28.27	25.069	20.027	23.576	27.971	24.109	9.729	16.506	11.379	14.082	16.613	10.643	15.636	16.94	26.1755	23.9207	12.924	14.958	10.3987	3.25167	2.98701	2.92952
909	13.77	37.445	27.602	24.335	20.021	22.597	27.895	25.047	9.822	16.049	11.65	14.974	16.503	10.997	15.383	17.047	25.788	23.89	13.1238	14.9825	9.75909	3.36748	2.88987	2.74583
910	13.776	37.063	28.054	23.385	20.103	22.851	28.198	24.661	9.419	16.827	12.112	14.768	16.493	10.752	15.361	16.824	25.5695	23.9533	13.2815	14.8575	9.69763	3.39402	3.21802	2.80776
911	13.983	37.79	27.143	24.34	20.501	22.471	28.566	24.705	9.291	16.515	12.438	14.709	16.791	10.374	15.905	16.822	25.814	24.0607	13.2383	14.973	9.78666	3.45984	3.11563	3.09534
912	13.619	38.355	28.245	23.731	20.282	22.347	29.188	24.554	9.983	16.848	12.236	14.544	15.811	10.66	16.143	16.289	25.9875	24.0928	13.4028	14.7258	10.2652	3.81854	2.95681	2.71787
913	13.576	38.372	28.788	24.289	20.954	22.633	28.36	25.01	9.434	16.248	12.171	15.018	16.27	11.117	15.583	16.985	26.2563	24.2393	13.2178	14.9887	10.2934	3.21183	3.04608	2.64387
914	13.38	39.393	28.501	25.428	19.821	23.616	29.053	26.157	9.325	15.896	11.661	15.186	16.325	11.013	15.61	18.2	26.6755	24.6617	13.017	15.287	10.6988	3.91771	3.08019	3.05147
915	13.458	38.151	27.955	23.68	19.647	21.377	28.207	24.357	9.525	15.969	11.843	13.6	16.536	10.799	15.832	16.87	25.811	23.397	12.7343	15.0093	10.2308	3.75058	2.72683	2.83998
916	13.679	38.689	28.772	23.813	19.99	22.641	29.675	24.697	9.528	16.238	12.117	14.05	16.089	10.53	15.894	16.798	26.2383	24.2508	12.9832	14.8277	10.4093	4.09743	2.8531	2.89138
917	13.664	38.549	28.304	23.461	20.559	22.072	27.995	25.468	9.35	17.162	12.343	14.316	16.265	10.594	15.878	16.477	25.9945	24.0235	13.2928	14.8035	10.3507	3.35015	3.28965	2.81727
918	13.423	37.781	27.052	24.188	19.574	22.726	27.629	24.572	9.317	15.814	11.941	14.44	15.905	10.522	15.851	16.67	25.611	23.6253	12.878	14.737	10.0126	3.3738	2.86465	2.83478
919	13.637	38.075	27.875	24.423	20.038	22.43	27.895	24.344	8.942	15.952	12.195	14.362	16.235	10.955	15.497	17.341	26.0025	23.6767	12.8628	15.007	10.0772	3.31832	3.03367	2.80561
920	12.889	38.626	29.176	25.589	19.474	24.32	28.934	25.952	9.798	16.169	12.085	15.253	16.44	10.605	15.607	17.268	26.57	24.67	13.3262	14.98	10.65	3.95585	2.9316	2.99446
921	13.328	38.195	27.911	23.327	19.928	22.373	27.383	24.909	8.919	15.528	12.241	14.077	15.53	10.831	15.295	17.039	25.6902	23.6482	12.6913	14.6738	10.3233	3.21478	2.8519	2.67583
922	12.442	39.006	28.547	23.978	19.373	22.867	29.051	25.948	8.897	16.306	11.805	14.651	16.748	10.968	15.762	17.208	25.9933	24.3098	12.9148	15.1715	11.0083	4.14794	3.26032	2.86652
923	13.136	38.447	28.359	24.131	19.409	22.645	28.254	26.183	9.162	15.866	11.693	14.399	16.267	10.748	15.787	17.288	26.0183	24.1228	12.78	15.0225	10.4796	3.90363	2.96738	2.91759
924	13.079	38.872	29.362	24.17	19.792	23.234	28.021	25.085	9.541	15.428	12.198	14.489	15.943	10.196	15.815	17	26.3708	24.033	12.914	14.7385	10.7509	3.44651	2.62619	3.07454
925	13.122	38.161	27.277	22.593	19.871	22.203	28.101	24.761	9.145	16.392	11.92	14.007	16.114	10.117	15.931	17.975	25.2883	23.734	12.866	15.0343	10.4074	3.53045	3.08087	3.40575
926	12.775	37.265	29.103	24.574	19.75	22.803	29.058	25.717	8.873	16.631	12.193	15.381	16.835	10.719	15.412	17.803	25.9292	24.332	13.2695	15.1923	10.2216	3.98271	3.47593	3.13969
927	13.412	37.823	28.995	23.178	19.569	23.314	27.795	25.102	8.968	16.419	12.083	14.599	15.391	10.449	15.624	17.859	25.852	23.945	13.0173	14.8308	10.2484	3.45006	3.23229	3.12587
928	13.491	38.152	28.211	24.398	20.012	23.064	28.327	25.637	9.098	16.549	11.617	14.105	15.692	10.943	15.68	17.871	26.063	24.26	12.8422	15.0465	10.1913	3.55493	3.20703	2.92315
929	13.137	37.978	27.629	23.394	19.13	23.273	28.616	24.91	8.633	16.009	12.189	14.44	15.898	10.047	15.606	17.665	25.5345	23.9823	12.8178	14.804	10.2877	3.93191	3.20017	3.29921
930	12.412	38.182	27.587	23.784	20.25	22.154	28.575	25.834	9	15.739	11.724	14.72	16.012	10.189	15.467	17.288	25.4913	24.2033	12.7957	14.739	10.6369	3.72376	3.05078	3.12785
931	12.184	37.995	26.849	23.49	19.76	21.693	28.073	24.219	8.699	15.66	11.762	13.125	15.62	10.024	15.609	17.5	25.1295	23.4363	12.3115	14.6883	10.6263	3.59007	2.89979	3.23404
932	12.66	38.62	28.77	24.124	19.461	23.233	30.607	25.487	8.812	16.262	11.418	13.773	15.697	10.561	15.807	18.03	26.0435	24.697	12.5663	15.0237	10.7766	4.65873	3.18997	3.16335
933	12.702	38.836	28.006	23.755	19.379	22.504	28.588	24.541	8.305	15.678	11.884	13.654	15.614	10.898	15.064	16.681	25.8247	23.753	12.3803	14.5643	10.8096	3.85962	3.12791	2.53468
934	11.925	37.383	28.489	22.946	19.063	22.559	29.23	24.944	8.949	15.226	10.935	13.535	15.624	9.841	15.577	18.047	25.1858	23.949	12.1612	14.7722	10.6544	4.26943	2.77501	3.48398
935	11.999	37.241	26.044	22.955	19.085	22.85	28.291	24.008	8.422	16.21	11.297	13.514	15.919	10.958	15.735	17.199	24.5598	23.5585	12.3607	14.9528	10.3821	3.7909	3.30616	2.74161
936	11.419	38.048	26.116	22.737	19.488	23.613	27.284	24.906	8.199	16.588	10.891	13.1	15.99	10.127	15.48	17.689	24.58	23.8227	12.1945	14.8215	10.9598	3.26536	3.54899	3.26904
937	11.683	37.453	28.172	22.808	20.036	23.134	26.726	24.58	8.443	15.829	10.442	13.2	15.505	9.927	14.528	17.118	25.029	23.619	11.9785	14.2695	10.7592	2.80773	3.22382	3.0857
938	11.755	36.043	26.38	22.444	19.373	21.217	27.198	24.233	7.568	15.581	10.962	14.519	13.87	11.444	15.064	16.922	24.1555	23.0053	12.1575	14.325	10.0493	3.43888	3.64188	2.29476
939	11.899	36.323	27.227	21.984	18.989	21.289	26.785	24.321	6.353	16.422	11.94	11.434	14.74	10.269	15.77	16.425	24.3582	22.846	11.5372	14.301	10.2022	3.41526	4.11947	2.77603
940	10.434	37.087	25.405	19.775	16.667	22.801	26.46	20.901	7.586	13.911	9.982	11.189	14.2	7.995	13.911	17.452	23.1752	21.7072	10.667	13.3895	11.1417	4.07591	2.63045	3.93842
941	11.166	37.103	28.428	23.16	19.318	22.696	27.653	26.336	7.258	15.86	11.215	14.64	13.508	9.486	14.13	18.668	24.9642	24.0008	12.2432	13.948	10.8473	3.76045	3.86158	3.76008
942	10.872	36	26.809	19.83	18.513	19.66	24.851	21.872	5.495	15.179	8.718	10.723	13.819	8.872	13.231	15.574	23.3777	21.224	10.0288	12.874	10.647	2.7911	4.05298	2.8476
943	10.308	36.255	26.383	21.362	18.403	21.191	27.234	21.957	7.812	14.517	9.822	13.021	15.086	9.012	15.273	15.404	23.577	22.1962	11.293	13.6937	10.7947	3.68942	3.03652	3.12389
944	9.746	36.27	27.802	20.445	18.083	20.701	26.689	25.577	7.812	14.293	9.421	12.233	14.349	10.828	14.672	15.398	23.5658	22.7625	10.9398	13.8117	11.2556	4.06146	2.88711	2.03696
945	10.568	37.73	28.548	21.369	18.244	21.87	27.546	25.292	8.817	14.038	9.937	12.855	14.086	9.569	13.985	17.028	24.5537	23.238	11.4118	13.667	11.4791	4.06568	2.44184	3.07499
946	10.4	34.972	26.511	21.273	17.777	20.064	27.317	25.544	8.084	15.01	10.041	11.684	13.865	9.682	13.934	15.552	23.289	22.6755	11.2048	13.2583	10.2805	4.49396	2.93275	2.50836
947	9.555	36.214	26.866	21.603	16.558	20.66	27.887	23.016	6.677	15.808	9.205	13.59	12.937	9.555	14.207	16.732	23.5595	22.0303	11.32	13.3577	11.1209	4.72921	4.13625	2.98578
948	10.665	37.9	25.614	19.136	17.084	22.189	28.295	21.519	7.866	14.488	9.769	13.105	14.258	9.58	13.969	16.232	23.3287	22.2717	11.307	13.5098	11.4818	4.61034	3.03081	2.80621
949	11.251	36.552	25.751	20.601	18.812	19.528	24.607	23.033	6.441	15.572	11.341	13.305	13.54	8.686	14.266	15.236	23.5388	21.495	11.6647	12.932	10.5492	2.77594	3.88799	2.91468
950	11.106	34.618	26.437	22.515	18.872	22.853	28.871	23.056	6.866	14.187	10.629	13.185	15.141	9.284	15.011	16.836	23.669	23.413	11.2167	14.068	9.77587	4.1171	3.2645	3.29591
951	11.411	38.841	29.247	21.586	19.419	22.452	28.381	26.249	7.368	15.643	10.498	14.724	13.979	9.71	15.187	16.456	25.2712	24.1253	12.0583	13.833	11.628	3.98205	3.84662	2.92882
952	11.411	37.548	29.479	20.839	18.548	20.013	27.764	24.079	7.801	13.548	10.202	14.676	13.783	8.468	15.161	17.726	24.8193	22.601	11.5568	13.7845	11.2451	4.16195	3.14302	3.90279
953	11.17	36.713	28.438	23.193	19.339	21.737	25.932	24.883	7.651	17.287	11.132	12.121	13.657	10.144	14.932	17.075	24.8785	22.9727	12.0478	13.952	10.7003	3.00763	3.98435	2.9041
954	10.874	39.036	26.521	21.183	18.63	21.24	28.129	24.914	7.033	14.969	10.475	13.49	14.89	9.387	15.187	16.246	24.4035	23.2282	11.4917	13.9275	11.7191	4.16158	3.51181	3.08244
955	12.065	38.303	27.584	21.436	18.339	22.252	28.346	24.483	6.921	15.477	10.72	13.166	14.131	9.204	14.719	15.941	24.847	23.355	11.571	13.4988	11.0086	4.18566	3.65821	2.96076
956	10.683	38.854	29.406	22.293	18.362	22.505	29.193	25.053	7.711	15.495	11.263	13.641	13.777	9.249	16.212	18.418	25.309	23.7782	12.0275	14.414	11.8781	4.54245	3.35875	3.93056
957	11.14	39.483	28.383	22.757	18.777	23.72	29.346	25.798	7.945	15.372	11.174	14.394	14.334	10.81	15.306	17.182	25.4408	24.4103	12.2212	14.408	11.7977	4.41578	3.36804	2.67411
958	12.212	37.989	26.399	21.248	19.682	22.09	28.182	24.269	6.695	14.972	11.627	12.333	14.717	9.938	15.037	17.385	24.462	23.5557	11.4068	14.2692	10.7568	3.60857	3.45534	3.1229
959	10.505	38.019	26.306	20.839	19.676	22.743	28.209	24.109	8.529	15.17	10.854	13.714	14.844	9.521	15.011	17.277	23.9172	23.6842	12.0667	14.1633	11.4591	3.54052	2.96255	3.28776
960	11.104	38.846	29.34	22.551	18.205	21.775	27.983	25.218	7.875	15.327	11.761	13.676	14.277	9.822	15.233	17.459	25.4602	23.2952	12.1597	14.1977	11.6733	4.23847	3.20669	3.20733
961	10.271	38.907	29.121	23.753	19.772	22.755	28.931	24.323	7.729	15.283	10.025	13.682	13.912	9.133	15.252	17.91	25.513	23.9453	11.6798	14.0518	11.942	3.82244	3.43215	3.67606
962	11.869	38.095	28.43	21.971	20.055	21.264	29.09	24.234	8.385	15.551	10.225	14.097	14.612	9.495	16.007	17.256	25.0913	23.6608	12.0645	14.3425	11.0274	4.0229	3.32712	3.40734
963	10.98	38.213	28.11	22.404	18.987	23.62	29.841	24.977	7.987	15.833	11.253	14.172	13.472	10.98	14.559	16.885	24.9267	24.3563	12.3113	13.974	11.3656	4.46612	3.44887	2.45168
964	11.46	39.027	26.533	21.666	18.685	23.304	29.34	25.129	6.661	15.073	11.638	12.915	14.587	9.298	14.776	16.285	24.6715	24.1145	11.5717	13.7365	11.4473	4.4148	3.56758	3.055
965	11.214	39.981	28.043	21.536	18.133	23.081	29.494	23.455	6.599	15.3	11.154	12.734	13.587	9.484	15.807	16.526	25.1935	23.5407	11.4467	13.851	12.0498	4.6513	3.65563	3.1687
966	10.839	37.448	27.749	20.974	19.17	22.367	28.445	25.708	8.464	15.049	11.466	12.575	15.149	10.451	16.005	16.195	24.2525	23.9225	11.8885	14.45	11.2104	4.02686	2.73043	2.70454
967	11.278	38.277	27.637	21.563	18.316	22.411	27.401	23.07	7.151	14.947	12.211	12.853	13.974	10.617	16.18	17.232	24.6888	22.7995	11.7905	14.5008	11.2982	3.7193	3.30627	2.9235
968	11.86	37.99	27.432	23.098	19.347	21.807	30.244	23.559	7.53	15.693	10.961	13.186	14.88	9.733	15.334	17.243	25.095	23.7392	11.8425	14.2975	10.815	4.66797	3.46439	3.21062
969	10.94	37.884	28.617	21.112	19.59	24.231	28.617	24.503	7.704	15.973	11.392	14.15	14.46	10.066	15.702	16.049	24.6382	24.2353	12.3048	14.0693	11.4216	3.69007	3.59912	2.75463
970	11.045	38.785	28.318	21.636	18.478	22.523	28.084	25.093	7.249	14.866	11.224	13.551	13.872	9.851	15.373	16.682	24.946	23.5445	11.7225	13.9445	11.6488	4.07095	3.34094	2.96066
971	12.241	40.296	27.096	21.491	19.292	22.881	28.115	25.475	6.813	14.911	10.381	13.386	13.473	10.921	16.682	17.091	25.281	23.9408	11.3727	14.5417	11.7353	3.7644	3.57525	2.90582
972	11.005	36.908	27.669	21.634	18.092	23.305	28.319	25.07	6.933	15.49	11.244	12.117	14.116	10.317	14.952	16.806	24.304	23.6965	11.446	14.0478	10.8655	4.27464	3.52194	2.72939
973	11.138	39.312	27.961	21.769	17.547	23.391	28.6	25.995	7.978	14.983	11.077	11.302	14.803	9.399	14.342	16.953	25.045	23.8833	11.335	13.8742	11.7783	4.72926	2.86618	3.19311
974	11.797	37.777	26.755	21.997	19.276	22.421	29.11	26.802	7.605	15.658	11.006	13.095	14.326	9.76	15.78	18.135	24.5815	24.4023	11.841	14.5003	10.7853	4.40172	3.40504	3.52843
975	10.834	39.049	28.53	21.614	19.015	23.295	28.146	24.976	7.097	16.014	11.276	14.409	13.363	10.739	16.551	18.06	25.0068	23.858	12.199	14.6782	11.86	3.80388	3.9294	3.27572
976	10.428	39.049	29.881	22.349	18.42	22.944	28.94	24.777	7.161	15.08	11.021	12.389	14.001	9.71	15.111	18.583	25.4268	23.7703	11.4127	14.3513	12.1084	4.36072	3.29811	3.65827
977	11.252	38.927	28.098	22.195	19.39	22.683	28.341	26.146	7.157	15.861	11.348	12.488	13.217	10.235	16.847	17.22	25.118	24.14	11.7135	14.3797	11.5525	3.93098	3.59151	3.30077
978	10.48	37.172	27.357	21.769	17.979	21.623	28.96	25.024	8.042	14.559	10.919	13.848	13.553	11.076	15.532	17.638	24.1945	23.3965	11.842	14.4498	11.1413	4.69382	2.98318	2.80015
979	10.721	38.852	28.66	20.331	18.681	22.607	28.35	24.677	8.029	14.815	10.591	11.743	14.3	8.739	15.107	17.693	24.641	23.5787	11.2945	13.9597	11.9784	4.03746	2.81386	3.76941
980	11.939	37.432	28.359	21.468	19.492	21.468	29.45	22.707	7.519	15.699	10.389	12.791	14.276	9.763	15.798	17.848	24.7995	23.2792	11.5995	14.4213	10.7818	4.32163	3.48049	3.4331
981	9.895	38.534	28.029	20.645	18.119	22.725	28.445	24.233	7.727	15.4	10.125	13.885	13.496	9.109	14.744	17.005	24.2757	23.3805	11.7843	13.5885	12.0744	4.26181	3.49767	3.32075
982	10.407	37.168	27.249	21.115	17.815	21.984	28.016	23.978	6.946	15.713	10.544	13.395	12.689	8.994	15.989	17.025	23.9847	22.9483	11.6495	13.6742	11.2108	4.24352	3.7817	3.6268
983	11.3	36.966	27.842	21.168	19.332	22.054	27.737	23.045	6.655	15.229	11.787	12.982	13.451	10.083	15.925	16.058	24.319	23.042	11.6632	13.8793	10.8287	3.50158	3.63096	2.80041
984	10.989	35.957	28.723	22.606	18.533	23.085	29.628	25.106	7.498	14.95	10.851	14.521	14.392	10.3	14.812	18.936	24.5688	24.088	11.955	14.61	10.5706	4.60405	3.49466	3.52981
985	10.707	35.684	27.137	19.338	18.055	21.1	28.579	24.252	7.045	14.766	11.861	12.607	13.174	9.867	14.906	16.72	23.2165	22.9965	11.5697	13.6668	10.6824	4.50021	3.25833	2.9177
986	10.471	38.772	26.549	19.272	18.261	22.342	28.482	24.446	7.303	15.217	11.558	11.711	13.077	9.674	15.652	17.908	23.766	23.3827	11.4473	14.0777	11.9705	4.26022	3.23871	3.53759
987	9.727	40.662	26.956	21.645	17.391	22.159	30.04	24.557	7.804	15.66	10.391	12.736	14.732	10.059	16.175	17.476	24.7475	23.5368	11.6477	14.6105	12.8243	5.25996	3.34845	3.23469
988	9.65	37.601	28.331	20.568	18.453	24.102	28.273	23.117	7.478	14.696	9.613	12.283	13.341	9.576	15.028	17.034	24.0375	23.4863	11.0175	13.7447	11.8524	4.03163	3.1429	3.16267
989	11.818	38.242	27.823	20.547	18.479	23.225	28.231	25.146	7.683	15.243	9.785	12.515	13.707	9.146	15.055	17.404	24.6075	23.7703	11.3065	13.828	11.1997	4.08598	3.2864	3.47511
990	9.708	39.453	27.094	20.44	18.544	21.212	27.094	23.827	6.575	14.031	11.225	12.953	13.816	9.86	14.259	19.311	24.1737	22.6692	11.196	14.3115	12.4523	3.65422	3.29033	3.87553
991	10.945	37.576	27.284	20.828	19.528	21.62	29.05	24.665	7.877	16.142	10.827	12.85	13.315	10.866	16.063	16.809	24.1583	23.7157	11.924	14.2632	11.1876	4.1346	3.47518	2.71787
992	10.535	37.64	28.82	20.807	17.925	23.23	27.888	25.28	7.206	13.719	10.574	12.484	13.01	10.063	15.055	16.832	24.4505	23.5808	10.9958	13.74	11.5466	4.22494	2.83849	2.90648
993	11.061	39.204	28.115	19.504	17.288	23.288	28.376	24.005	6.683	15.69	10.406	12.329	12.995	9.136	16.346	18.591	24.471	23.2392	11.277	14.267	12.0394	4.56042	3.76142	4.12166
994	10.593	37.042	28.571	20.291	17.614	22.63	28.887	24.716	7.55	15.057	10.227	15.107	13.459	9.131	16.315	18.205	24.1242	23.4618	11.9853	14.2775	11.32	4.68666	3.73916	3.94686
995	10.05	37.587	29.651	20	19.145	23.429	29.46	24	6.17	15.822	11.545	14.413	13.453	10.008	15.656	17.714	24.322	24.0085	11.9875	14.2077	11.9266	4.23117	4.26714	3.2964
996	10.213	36.492	27.017	21.639	18.585	21.511	27.017	25.352	6.704	15.404	10.339	12.228	13.664	9.167	14.86	17.606	23.8402	23.1163	11.1688	13.8243	10.9652	3.80015	3.63693	3.51616
997	10.494	39.426	28.525	21.214	17.736	22.977	30.091	25.587	6.142	15.828	10.408	14.426	12.457	9.41	14.484	18.995	24.9147	24.0978	11.701	13.8365	12.1828	5.15961	4.36013	4.02187
998	10.043	37.922	27.193	19.973	17.043	21.457	26.046	23.684	6.898	14.957	10.304	12.483	12.951	8.739	15.087	17.409	23.7828	22.0575	11.1605	13.5465	11.7593	3.83229	3.41882	3.68595
999	11.048	36.457	27.291	18.947	18.354	22.64	28.386	23.119	6.557	15.097	10.035	11.833	12.059	9.639	15.537	18.331	23.4358	23.1247	10.8805	13.8915	10.9243	4.10998	3.56341	3.82355
1000	10.032	37.607	27.436	21.633	17.249	22.708	26.074	23.926	7.3	14.889	10.077	13.61	12.763	9.124	14.662	16.117	24.177	22.4892	11.469	13.1665	11.5114	3.76044	3.44473	3.02471
