# Supplementary material for: Molecular basis of wax-based color change and UV reflection in dragonflies
Source: eLife. 2019 Jan 15;8:e43045. doi: 10.7554/eLife.43045 (PMC6353593; doi:10.7554/eLife.43045)
Supplement: Figure 2—source data 2. [file elife-43045-fig2-data2.xlsx]

## Sheet: OalbistylumImmature-CRAIC
	Male	Male	Male	Male	Male	Male	Male	Male	Male	Male	Male	Male	Male	Male	Male	Male	Male	Male	Male	Male	Male	Male	Male	Male	Male	Male	Male	Male	Male	Male	Male	Male	Male	Male	Male	Male	Male	Male	Male	Male	Female	Female	Female	Female	Female	Female	Female	Female	Female
wavelength	M5D1-1	M5D1-2	M5D1-3	M5D1-4	M5D1-5	M5D2-1	M5D2-2	M5D2-3	M5D2-4	M5D2-5	M5D3-1	M5D3-2	M5D3-3	M5D3-4	M5D3-5	M5D4-1	M5D4-2	M5D4-3	M5D4-4	M5D4-5	M5V1-1	M5V1-2	M5V1-3	M5V1-4	M5V1-5	M5V2-1	M5V2-2	M5V2-3	M5V2-4	M5V2-5	M5V3-1	M5V3-2	M5V3-3	M5V3-4	M5V3-5	M5V4-1	M5V4-2	M5V4-3	M5V4-4	M5V4-5	F5D1-1	F5D1-2	F5D1-3	F5D2-1	F5D2-2	F5D2-3	F5D2-4	F5D2-5	F5D3-1
380	15.533	17.9825	16.439	19.6798	15.4935	17.9473	16.1679	19.0163	16.8925	13.7124	16.5887	17.7909	17.3991	16.5244	18.9216	14.7276	14.5424	14.7984	14.7909	15.8991	19.9146	22.5087	23.0494	23.5058	20.3918	20.3632	18.2043	18.995	19.4154	16.0798	20.5802	18.6916	23.4097	22.2816	20.963	15.5885	14.8895	15.3809	15.3194	15.6669	12.2171	12.7451	14.1604	14.9083	14.8303	26.4638	17.6017	15.0067	17.8489
381	15.1026	17.519	15.7594	19.049	15.0899	17.7126	15.9242	18.7515	16.5833	13.308	16.2814	17.4514	17.1328	16.0738	18.7471	14.3956	14.1048	14.3612	14.5289	15.6534	19.4966	21.9509	22.4961	23.0332	19.7065	20.2367	18.0381	18.642	19.1257	15.8527	20.2755	18.3879	23.0433	21.9007	20.7021	15.2621	14.7233	14.9525	15.0598	15.4633	11.7621	12.5865	13.8504	14.6017	14.6171	26.3285	17.3659	14.7494	17.3796
382	14.5712	17.1456	15.174	18.5871	14.603	17.7178	15.782	18.5958	16.3027	13.0242	15.9433	17.2071	16.8797	15.7326	18.6499	14.0775	13.797	14.1532	14.3147	15.415	19.1454	21.4872	22.0731	22.5978	19.285	20.0025	17.987	18.533	18.9244	15.4991	20.0226	18.1557	22.8582	21.5623	20.5641	14.8712	14.4764	14.6054	14.7869	15.2915	11.8742	12.5474	13.8893	14.2182	14.3837	25.9965	17.1867	14.5372	16.9808
383	14.0417	16.6272	14.7027	17.9995	13.9921	17.4849	15.5312	18.3446	16.0973	12.7964	15.5772	17.0247	16.6604	15.415	18.4393	13.8663	13.5967	13.8234	13.9566	14.9704	18.5868	20.8645	21.5629	21.9317	18.9548	19.7059	17.7752	18.2338	18.7682	15.2213	19.6483	17.9478	22.6099	21.3321	20.3011	14.462	14.2266	14.3717	14.5128	14.9816	11.788	12.3684	13.6756	13.882	14.0616	25.8427	16.902	14.2576	16.5423
384	13.3917	16.0858	13.9897	17.2905	13.2826	17.0399	15.2649	18.0168	15.6944	12.4782	15.0974	16.6724	16.3049	15.0233	18.1492	13.4168	13.1733	13.3729	13.4684	14.5729	17.7478	20.314	20.7989	21.4008	18.3023	19.3992	17.3248	18.0231	18.525	14.8205	19.3879	17.4998	22.1013	21.1537	19.9906	14.0212	13.8472	13.9642	14.1997	14.4678	11.5378	12.0075	13.4296	13.6717	13.6378	25.7496	16.5053	13.9065	15.9631
385	12.7833	15.594	13.4231	16.7626	12.7387	16.7557	14.8841	17.7946	15.3062	11.949	14.7327	16.1913	15.8649	14.6043	17.5598	13.0275	12.6596	12.8043	13.0525	14.2172	17.1973	19.9317	20.4109	20.8574	17.754	19.077	16.8869	17.7173	18.1876	14.3465	18.9924	16.9986	21.7189	20.631	19.5295	13.5567	13.4373	13.5807	13.6662	14.0303	11.2091	11.658	12.9123	13.3148	13.3288	25.5058	16.1773	13.6193	15.4684
386	12.3064	15.2735	12.9561	16.343	12.3265	16.5457	14.5759	17.6015	15.1046	11.728	14.3832	15.8355	15.5379	14.3012	17.1985	12.7738	12.2018	12.5267	12.7668	13.9369	16.7787	19.5443	19.9406	20.4438	17.3441	18.7491	16.6469	17.3462	17.8392	14.0999	18.7331	16.7585	21.5284	20.3717	19.2462	13.2649	13.1012	13.1371	13.2727	13.7674	10.7832	11.3944	12.5589	12.9009	13.0933	25.2082	15.9404	13.3835	15.1701
387	11.9603	15.008	12.5657	16.0571	11.9972	16.3872	14.4159	17.4172	14.9945	11.5869	14.1796	15.6407	15.4508	14.1484	17.2419	12.5933	12.0495	12.4553	12.65	13.8093	16.422	19.2206	19.5689	20.2529	17.1384	18.6361	16.5622	17.2392	17.8061	13.871	18.6759	16.7073	21.4304	20.3712	19.2232	13.1684	12.856	13.0009	13.1464	13.6143	10.6962	11.2191	12.449	12.709	12.8266	25.1627	15.5289	13.2357	14.8285
388	11.9594	14.9723	12.4237	15.9163	11.8224	16.1682	14.173	17.2585	14.8037	11.236	13.9078	15.4215	15.3403	13.8334	17.1247	12.3744	11.8723	12.2266	12.3988	13.5576	16.3477	19.0077	19.6082	20.213	17.0272	18.5169	16.4327	17.0104	17.679	13.5939	18.5988	16.54	21.2889	20.1689	18.9791	12.9243	12.5599	12.7427	12.9065	13.3103	10.6478	11.1129	12.3787	12.6224	12.7654	25.1778	15.3707	13.2253	14.6419
389	11.8617	14.911	12.3006	15.6218	11.6065	16.032	14.1034	17.2865	14.735	11.0233	13.777	15.3418	15.2039	13.6843	16.9221	12.2364	11.7672	12.0486	12.2866	13.4291	16.1735	18.9219	19.5807	20.18	16.9984	18.3955	16.4138	16.9181	17.5518	13.6649	18.3913	16.48	21.2574	20.0912	18.92	12.7484	12.4933	12.6135	12.8987	13.2327	10.5108	10.9071	12.1067	12.5578	12.7921	25.2499	15.3451	13.0636	14.557
390	11.6724	14.8429	12.187	15.3817	11.4959	15.8819	13.9077	17.1555	14.6162	10.9079	13.5972	15.1141	14.9756	13.4716	16.7869	12.0127	11.5878	11.8553	12.0989	13.2811	15.9922	18.9261	19.5194	20.1424	16.9112	18.2597	16.3198	16.8517	17.3474	13.6645	18.232	16.398	21.1686	20.0479	18.8409	12.4909	12.3297	12.4845	12.7379	13.0576	10.2669	10.7503	11.8869	12.4397	12.7224	25.3632	15.3246	12.9481	14.5187
391	11.4904	14.822	12.0768	15.4196	11.3929	15.8437	13.68	17.0022	14.4573	10.7915	13.405	14.9185	14.7584	13.264	16.7673	11.8494	11.4655	11.6896	11.884	13.177	15.9037	18.8978	19.565	20.0691	16.8547	18.1552	16.1706	16.7925	17.1527	13.4965	18.1768	16.2774	21.0148	19.896	18.7558	12.3973	12.0816	12.318	12.6222	12.8984	10.1452	10.7116	11.7479	12.3862	12.6906	25.377	15.1809	12.875	14.4534
392	11.4032	14.9129	11.9396	15.3585	11.219	15.9576	13.7689	16.9231	14.5147	10.776	13.4145	15.0288	14.8182	13.304	16.8459	11.9007	11.397	11.7657	11.9568	13.2273	15.8444	18.8926	19.4928	20.0028	16.8298	18.2124	16.2514	16.8422	17.2194	13.5408	18.2266	16.4035	21.1311	20.0126	18.8873	12.5558	12.1322	12.3609	12.7044	12.9434	10.2072	10.6824	11.7183	12.3385	12.5585	25.4925	15.0588	12.9067	14.2692
393	11.2885	14.9316	11.8542	15.0801	10.9775	15.8961	13.8304	16.9899	14.5067	10.7092	13.4777	15.0796	14.925	13.2352	16.9268	11.9633	11.368	11.81	11.9258	13.2353	15.6946	18.7881	19.2423	19.8516	16.5971	18.222	16.2628	16.9005	17.1862	13.5066	18.1532	16.3914	21.0889	20.0905	18.9209	12.507	12.07	12.2834	12.6366	12.8034	10.2435	10.6128	11.731	12.1842	12.4128	25.4168	14.8786	12.7801	14.1498
394	11.191	14.8776	11.6536	14.9053	10.8512	15.8368	13.6986	17.0377	14.486	10.6617	13.4538	15.0527	14.8808	13.189	16.8678	11.9447	11.2674	11.7618	11.9064	13.2069	15.4998	18.8192	19.2312	19.7425	16.4855	18.2837	16.2483	16.9596	17.1904	13.3641	18.0199	16.3034	20.9733	20.1423	18.9773	12.3237	11.987	12.0462	12.4432	12.6739	10.1888	10.4957	11.5394	12.0209	12.335	25.4652	14.7205	12.6524	14.1752
395	11.0483	14.8364	11.5776	14.8227	10.9	15.8716	13.6543	17.1333	14.4125	10.635	13.3903	14.9055	14.8117	13.1529	16.8642	11.8326	11.2529	11.7213	11.9954	13.1825	15.5271	18.8649	19.2811	19.9949	16.6219	18.3063	16.2203	17.0814	17.1002	13.3147	18.0061	16.3252	21.012	20.1095	19.0868	12.1836	11.9082	12.0359	12.4694	12.7224	10.146	10.5481	11.5234	12.1155	12.3847	25.4321	14.7097	12.753	14.2149
396	10.9702	14.843	11.5413	14.8999	10.7513	15.8006	13.6331	17.1536	14.3635	10.4435	13.1943	14.7529	14.8039	13.0144	16.8399	11.761	11.1831	11.6838	11.9494	13.0381	15.4344	18.9467	19.3342	20.0739	16.6545	18.1739	16.1725	16.9424	16.9883	13.2598	17.9535	16.2387	21.0584	20.0595	18.975	12.0441	11.8304	11.929	12.4141	12.6715	10.1674	10.724	11.5529	12.0601	12.4857	25.5353	14.6526	12.8391	14.2114
397	10.9901	14.8996	11.4715	14.9496	10.6039	15.7705	13.5501	17.0552	14.2815	10.3148	13.0221	14.6992	14.6671	12.8079	16.8049	11.677	11.0648	11.5763	11.7108	13.0096	15.3573	19.1241	19.4559	20.1835	16.667	18.1238	16.1073	16.7681	16.9109	13.1818	17.8797	16.176	21.0045	20.0924	18.9014	11.9808	11.7803	11.8579	12.2808	12.5376	10.1865	10.8235	11.4971	12.0955	12.5503	25.7616	14.6527	12.9157	14.27
398	10.9172	14.9698	11.468	14.8734	10.4878	15.7811	13.4835	17.018	14.2968	10.2595	13.0117	14.654	14.6012	12.7269	16.7613	11.6323	10.9395	11.4816	11.594	13.0664	15.373	19.1427	19.5406	20.2499	16.7107	18.1661	16.0812	16.7674	16.9163	13.1828	17.9087	16.2184	21.0988	20.1777	18.9163	11.9727	11.6117	11.7881	12.1634	12.4793	10.1988	10.7376	11.5047	12.0832	12.5397	25.8703	14.6461	12.9653	14.3123
399	10.7189	14.9617	11.3653	14.7639	10.356	15.837	13.4021	17.0561	14.2725	10.3473	13.0417	14.6293	14.6122	12.7366	16.7764	11.755	10.9303	11.546	11.5992	13.1679	15.3138	19.1789	19.5211	20.4261	16.7188	18.235	16.1806	16.8444	16.957	13.3219	17.7952	16.2931	21.2188	20.3518	18.9795	11.9196	11.5419	11.7634	12.209	12.3461	10.1132	10.663	11.5444	12.1587	12.4893	25.9699	14.6519	13.0995	14.2123
400	10.6393	14.917	11.3278	14.603	10.2373	15.8192	13.4137	17.0513	14.2341	10.2999	12.9872	14.6388	14.5651	12.7091	16.7444	11.7041	10.8307	11.4436	11.6102	13.17	15.2278	19.1681	19.5343	20.4679	16.7207	18.2736	16.2626	16.8316	16.9018	13.2741	17.7203	16.2466	21.2249	20.3347	18.9596	11.8961	11.491	11.7091	12.204	12.3094	10.0533	10.6589	11.4574	12.1903	12.4811	26.0594	14.6582	13.0706	14.2015
401	10.4601	14.7711	11.179	14.3565	10.1134	15.6726	13.3273	16.9693	14.0983	10.1191	12.8268	14.4891	14.4417	12.4819	16.6446	11.5999	10.6693	11.3764	11.5164	13.0405	15.0179	19.2435	19.4097	20.4954	16.5822	18.3174	16.257	16.7651	16.8165	13.1169	17.5586	16.0707	21.1504	20.3196	18.8525	11.7906	11.3461	11.5938	12.0672	12.176	9.9886	10.7814	11.3591	12.1442	12.4844	26.0612	14.5509	13.0783	14.1074
402	10.3746	14.6704	11.0452	14.1727	9.9829	15.6976	13.1996	16.9952	14.0347	9.9817	12.8333	14.3882	14.3553	12.3685	16.6453	11.5434	10.6778	11.4004	11.5697	13.066	14.8901	19.2852	19.4929	20.523	16.6113	18.4111	16.2371	16.7651	16.7592	13.093	17.5361	16.09	21.1749	20.3001	18.8622	11.7414	11.3285	11.5253	11.8918	12.1887	9.9412	10.7194	11.2422	12.1362	12.4836	26.2166	14.508	13.1037	14.1866
403	10.1528	14.6876	10.8046	13.9823	9.8198	15.5946	13.0967	16.9653	13.9661	9.9569	12.807	14.2985	14.2549	12.1811	16.5759	11.4299	10.6189	11.3328	11.5203	13.0808	14.7726	19.3351	19.5445	20.5265	16.6184	18.3286	16.2266	16.7249	16.6875	13.028	17.4057	16.1216	21.1355	20.3603	18.8875	11.6752	11.2315	11.3977	11.794	12.068	9.8861	10.6305	11.2018	12.1162	12.4855	26.3303	14.3676	13.1992	14.1283
404	10.0442	14.6657	10.6054	13.8975	9.5853	15.5467	12.9664	16.9059	13.8706	9.8957	12.7125	14.244	14.2151	12.0402	16.5368	11.3801	10.5527	11.3214	11.4406	13.0888	14.5919	19.4739	19.5912	20.5167	16.5918	18.2981	16.2158	16.7137	16.6306	13.0242	17.3246	16.1296	21.1277	20.3561	18.841	11.6248	10.9797	11.3317	11.7331	11.9427	9.9125	10.7106	11.1279	12.0765	12.5072	26.4075	14.2966	13.3348	14.0288
405	9.9988	14.7668	10.5204	13.7922	9.4203	15.5918	12.988	16.9318	13.8811	9.9083	12.6788	14.1769	14.2168	12.0209	16.5714	11.3916	10.5261	11.3156	11.4571	13.1306	14.538	19.543	19.6749	20.598	16.6025	18.4058	16.3041	16.7764	16.6406	13.0524	17.3618	16.2412	21.2589	20.4699	18.9128	11.6123	10.8994	11.2811	11.7581	11.9704	9.9356	10.7471	11.117	12.1943	12.5856	26.6224	14.3618	13.3964	14.0618
406	9.8591	14.6359	10.4209	13.6868	9.2138	15.6163	12.937	16.8555	13.891	9.8004	12.6155	14.0791	14.1859	11.959	16.5289	11.3934	10.516	11.328	11.4624	13.143	14.3939	19.5811	19.6972	20.6379	16.5865	18.4498	16.3093	16.7266	16.638	13.028	17.3171	16.2414	21.3001	20.5075	18.9571	11.5692	10.8303	11.0862	11.6582	11.9709	10.076	10.8181	11.0892	12.2841	12.648	26.6557	14.2922	13.4152	14.063
407	9.6648	14.5002	10.2543	13.4135	9.0551	15.5583	12.8254	16.8109	13.8678	9.7239	12.5276	13.9689	14.076	11.8869	16.4458	11.3065	10.4485	11.3369	11.3936	13.1985	14.2646	19.5911	19.6449	20.714	16.5406	18.438	16.3253	16.6692	16.6817	12.9864	17.1896	16.1878	21.3077	20.4334	18.98	11.4588	10.7897	10.9137	11.5755	11.8295	10.0027	10.8027	10.93	12.2879	12.6932	26.7675	14.1606	13.5596	14.0745
408	9.6188	14.4523	10.1429	13.3136	8.9525	15.4991	12.8054	16.7562	13.7939	9.6766	12.4416	13.9132	14.0043	11.7532	16.3707	11.2395	10.3511	11.2913	11.3693	13.205	14.2025	19.6765	19.7554	20.8464	16.5275	18.4906	16.333	16.6459	16.6353	13.0026	17.0684	16.166	21.3301	20.4754	19.0111	11.3728	10.6959	10.8382	11.4921	11.6636	9.9567	10.8928	11.0221	12.2911	12.7821	26.9239	14.0769	13.806	14.1467
409	9.4217	14.3019	9.9966	13.1248	8.6914	15.4288	12.7006	16.709	13.679	9.6111	12.4022	13.8691	13.9449	11.6103	16.3148	11.1721	10.271	11.2581	11.3317	13.2199	14.0324	19.7658	19.7217	20.8853	16.4177	18.526	16.363	16.6541	16.5542	12.9476	17.0094	16.1232	21.338	20.5377	18.9755	11.3365	10.5374	10.7209	11.3457	11.5586	10.0017	10.8528	10.9909	12.2749	12.7426	26.9588	13.9489	13.8645	14.0967
410	9.2882	14.2777	9.923	12.9965	8.56	15.4206	12.7073	16.7297	13.6608	9.6	12.436	13.8447	13.9839	11.5343	16.3014	11.2084	10.2714	11.2784	11.3863	13.3327	13.9248	19.8741	19.7627	20.9906	16.4649	18.5351	16.4304	16.6524	16.522	13.0434	17.0489	16.2067	21.3641	20.6157	18.9563	11.366	10.484	10.6901	11.3442	11.5482	10.0344	10.9154	10.9911	12.3144	12.7752	27.0161	13.9252	14.0081	14.1712
411	9.202	14.177	9.8588	12.8856	8.445	15.2974	12.6525	16.7168	13.6043	9.569	12.3731	13.7838	13.8961	11.4601	16.28	11.2047	10.2597	11.3055	11.3741	13.4027	13.7923	19.9469	19.739	21.0362	16.4046	18.5939	16.4479	16.6179	16.4487	13.0526	17.018	16.28	21.4429	20.6792	19.0017	11.35	10.3868	10.5982	11.2879	11.4949	10.0664	11.0058	11.0384	12.385	12.8917	27.1557	13.8822	14.1821	14.1645
412	9.1165	14.0812	9.7299	12.7539	8.3203	15.235	12.6025	16.6486	13.5279	9.4757	12.2834	13.6918	13.7902	11.3733	16.2623	11.2264	10.2568	11.3603	11.3756	13.4166	13.6768	19.9836	19.7595	21.1024	16.352	18.6132	16.4548	16.5206	16.3699	13.0175	16.9409	16.2499	21.4666	20.7225	18.9794	11.3144	10.3067	10.563	11.2266	11.394	10.0632	11.0681	10.9428	12.4187	12.9444	27.2784	13.8096	14.3376	14.1976
413	9.0624	14.0345	9.6857	12.7054	8.2137	15.2767	12.548	16.6313	13.4623	9.4703	12.2056	13.6566	13.6861	11.263	16.2457	11.2697	10.2384	11.3718	11.4198	13.5183	13.6337	20.0417	19.8483	21.2125	16.3811	18.6835	16.5089	16.5199	16.3749	13.037	16.8986	16.2268	21.5197	20.7992	18.9747	11.3114	10.2073	10.4892	11.1902	11.3695	10.1357	11.1656	10.9668	12.4967	13.0253	27.4393	13.771	14.5408	14.3042
414	9.0032	13.9813	9.6142	12.6232	8.1294	15.2303	12.5048	16.6678	13.4488	9.4995	12.1585	13.6109	13.666	11.2386	16.1536	11.3322	10.2947	11.464	11.4682	13.6517	13.512	20.1257	19.981	21.3576	16.3804	18.8113	16.5896	16.4876	16.3396	13.0897	16.9226	16.3358	21.5765	20.8538	19.0155	11.2769	10.1521	10.4115	11.1004	11.3603	10.1466	11.2156	10.9635	12.5795	13.1161	27.6338	13.7073	14.7261	14.3539
415	8.9548	14.0084	9.5959	12.5437	8.0139	15.1532	12.4413	16.6383	13.3598	9.5047	12.141	13.4855	13.5968	11.1491	16.0696	11.343	10.3049	11.5013	11.485	13.7507	13.4163	20.252	20.0654	21.5608	16.4688	18.8853	16.6394	16.3943	16.287	13.1146	16.9409	16.3484	21.6025	20.905	18.9992	11.2362	10.0729	10.3304	11.0595	11.3054	10.1592	11.2234	10.9462	12.6895	13.2222	27.7755	13.6254	14.9616	14.4559
416	8.9359	13.9939	9.5601	12.4706	7.9353	15.0407	12.3521	16.5254	13.3372	9.455	12.0839	13.3327	13.4692	10.9565	15.9698	11.2663	10.2361	11.4993	11.4972	13.7698	13.4276	20.3413	20.1659	21.7042	16.524	18.8376	16.568	16.3165	16.1889	13.0918	16.8179	16.2391	21.5714	20.8638	18.9054	11.1978	9.9473	10.2598	10.9812	11.2112	10.2123	11.339	10.9776	12.6951	13.3131	27.8513	13.5783	15.2275	14.5865
417	8.8827	13.9064	9.4675	12.3379	7.8347	14.9718	12.257	16.378	13.3041	9.3516	11.9811	13.2149	13.3542	10.8422	15.8736	11.2431	10.1839	11.5035	11.5055	13.8062	13.3382	20.4289	20.1856	21.7853	16.596	18.7629	16.4754	16.319	16.1134	13.098	16.64	16.1314	21.4844	20.79	18.8137	11.1836	9.8241	10.1585	10.8969	11.1453	10.2975	11.4816	11.0311	12.7081	13.3071	27.8857	13.445	15.3653	14.6597
418	8.8167	13.8585	9.4142	12.2721	7.8108	14.9399	12.2037	16.3437	13.2305	9.3694	11.919	13.1988	13.3038	10.8146	15.8422	11.28	10.1656	11.4981	11.5405	13.8747	13.2602	20.4616	20.2135	21.8056	16.5722	18.8377	16.5168	16.3022	16.0486	13.1027	16.5769	16.1214	21.4724	20.8238	18.78	11.1578	9.7874	10.0858	10.8715	11.0876	10.3691	11.5958	11.0438	12.7137	13.3157	27.9093	13.3874	15.514	14.7055
419	8.7496	13.8258	9.3162	12.1701	7.6983	14.9125	12.1038	16.2609	13.11	9.33	11.8483	13.1437	13.2262	10.7466	15.738	11.2832	10.1366	11.5369	11.4966	13.9927	13.1181	20.5296	20.2402	21.9228	16.5598	18.8806	16.5203	16.2678	15.9899	13.054	16.4837	16.0888	21.4528	20.7918	18.759	11.1255	9.7132	9.9301	10.7863	11.0001	10.3347	11.5929	10.9546	12.757	13.4014	27.9147	13.2703	15.717	14.7244
420	8.661	13.7316	9.2222	12.0687	7.5249	14.8198	11.995	16.1167	12.9965	9.2793	11.8104	12.9856	13.115	10.5657	15.5963	11.2458	10.0567	11.528	11.4837	14.0355	12.9733	20.5598	20.2294	21.9892	16.5384	18.823	16.467	16.1807	15.8302	13.0119	16.3395	16.0432	21.3996	20.7078	18.6737	11.0914	9.5953	9.8136	10.706	10.8983	10.3128	11.6142	10.8993	12.8018	13.4574	27.9202	13.1353	15.8772	14.7434
421	8.5986	13.698	9.1828	11.9595	7.4472	14.7179	11.9096	16.0022	12.882	9.2293	11.7406	12.8534	12.9628	10.4409	15.5083	11.2543	10.0305	11.5563	11.5152	14.0437	12.8991	20.6226	20.2585	22.0939	16.5355	18.8118	16.427	16.0803	15.6913	13.0065	16.232	16.0079	21.3866	20.713	18.6087	11.0708	9.4834	9.7538	10.595	10.8272	10.3781	11.6891	10.9223	12.8731	13.4913	27.9694	13.1111	16.034	14.8258
422	8.5008	13.664	9.1472	11.8428	7.3595	14.6471	11.8517	15.953	12.8596	9.1909	11.7057	12.7795	12.9153	10.397	15.4635	11.2725	10.0558	11.5999	11.5402	14.1307	12.8599	20.6696	20.2526	22.1891	16.5029	18.8784	16.4425	16.0385	15.6805	12.9956	16.1979	16.0413	21.3212	20.708	18.5454	11.0614	9.4185	9.7404	10.588	10.8147	10.4024	11.7731	10.9319	12.938	13.5522	28.0293	13.0171	16.266	14.9296
423	8.495	13.6005	9.153	11.7869	7.3119	14.5666	11.7351	15.9229	12.8032	9.1369	11.6412	12.7164	12.8014	10.2873	15.4193	11.2538	10.04	11.6087	11.5766	14.1967	12.8118	20.6428	20.2494	22.2074	16.5803	18.864	16.3896	15.922	15.6386	12.9919	16.1389	16.011	21.2446	20.6859	18.4868	11.0466	9.3545	9.682	10.5723	10.7741	10.3535	11.8266	10.8922	12.99	13.6533	27.9848	12.8109	16.5226	15.0099
424	8.4985	13.5603	9.0866	11.685	7.2097	14.4437	11.6177	15.8377	12.7098	9.0917	11.5406	12.573	12.6992	10.1669	15.2994	11.1942	9.9653	11.5327	11.5932	14.2126	12.6973	20.5441	20.2087	22.2008	16.5619	18.8142	16.2936	15.7951	15.5548	12.9608	15.9971	15.902	21.0684	20.6414	18.3482	11.0071	9.2229	9.5534	10.4621	10.7277	10.3753	11.9044	10.89	13.0772	13.7146	27.9423	12.7292	16.7095	15.0394
425	8.3857	13.4456	8.9297	11.5152	7.0519	14.3679	11.4885	15.7194	12.5882	9.0554	11.4241	12.4127	12.6173	10.0759	15.1722	11.1968	9.8922	11.5343	11.5607	14.3042	12.5539	20.4469	20.113	22.2114	16.415	18.7293	16.2172	15.7415	15.4466	12.8381	15.8853	15.8485	20.9467	20.5558	18.2284	10.9677	9.0799	9.4407	10.3524	10.6141	10.4307	12.0045	10.8769	13.0938	13.7073	27.9072	12.6168	16.8305	14.9966
426	8.286	13.2268	8.8221	11.3509	6.9118	14.2727	11.3857	15.5617	12.4689	9.0578	11.3456	12.3241	12.5371	9.9465	15.0297	11.1122	9.8713	11.5348	11.5133	14.3039	12.4141	20.3725	20.0623	22.2074	16.2847	18.6565	16.1663	15.6208	15.2781	12.7714	15.7316	15.7659	20.885	20.4156	18.0859	10.8964	9.0019	9.3097	10.2603	10.4743	10.363	12.0145	10.8023	13.0702	13.7417	27.7748	12.4797	16.9956	14.9504
427	8.2223	13.156	8.7646	11.1853	6.7898	14.0817	11.2551	15.3974	12.3695	9.0434	11.2681	12.1912	12.3548	9.7399	14.8742	11.0973	9.755	11.5085	11.4539	14.2362	12.3368	20.2921	20.0349	22.1733	16.1567	18.5821	16.0964	15.4487	15.04	12.736	15.4574	15.5629	20.8162	20.2416	17.924	10.7957	8.8413	9.1609	10.0927	10.3951	10.3587	12.1036	10.8127	13.1061	13.7661	27.6203	12.3771	17.174	14.9335
428	8.1958	13.1914	8.7103	11.1041	6.7184	13.9588	11.1472	15.2561	12.2753	9.0045	11.1842	12.0327	12.2197	9.6187	14.754	11.0754	9.7005	11.498	11.4773	14.2431	12.2225	20.2283	20.0122	22.2374	16.1255	18.5	16.0526	15.3138	14.889	12.7046	15.2837	15.43	20.713	20.1397	17.8097	10.7577	8.7309	9.0643	10.0051	10.3168	10.4369	12.1701	10.8025	13.1927	13.8381	27.576	12.3364	17.3555	14.97
429	8.1448	13.1646	8.6446	10.9966	6.6233	13.9168	11.0999	15.1569	12.2757	8.9745	11.1493	11.9803	12.1626	9.5616	14.6813	11.1031	9.7427	11.5144	11.5388	14.3499	12.078	20.1238	19.9552	22.1702	16.0936	18.4331	15.9846	15.2798	14.8173	12.7043	15.2583	15.3475	20.6832	20.1253	17.7673	10.728	8.7247	9.0342	9.9998	10.2232	10.5215	12.2116	10.849	13.1848	13.8566	27.5794	12.1872	17.5464	14.9811
430	8.0421	13.0234	8.4968	10.8662	6.5017	13.7594	10.9364	15.0204	12.1761	8.9061	11.0139	11.8399	12.0115	9.413	14.5306	11.0522	9.6668	11.448	11.5246	14.3311	11.9061	19.9776	19.7845	22.1153	16.0244	18.3157	15.8755	15.1845	14.6722	12.605	15.1097	15.2076	20.5185	20.0267	17.6002	10.636	8.6281	8.9197	9.8749	10.1027	10.5327	12.3078	10.8728	13.1854	13.8482	27.4839	12.0396	17.6903	14.9304
431	7.8731	12.8132	8.3493	10.6972	6.339	13.5736	10.7833	14.8331	11.9851	8.838	10.902	11.6941	11.821	9.2543	14.3206	10.942	9.5654	11.4311	11.4018	14.2642	11.7468	19.8183	19.6686	22.0617	15.8873	18.209	15.758	15.0648	14.4383	12.5132	14.9289	15.1115	20.3843	19.8902	17.46	10.5262	8.4595	8.7826	9.6926	10.0134	10.4988	12.372	10.8594	13.12	13.8289	27.3117	11.858	17.7714	14.8411
432	7.7154	12.6251	8.2437	10.5172	6.1913	13.457	10.6962	14.7145	11.8775	8.7921	10.8149	11.577	11.7053	9.1265	14.1583	10.9276	9.5301	11.4218	11.3342	14.2196	11.5956	19.6284	19.5001	21.9705	15.7095	18.0984	15.6941	14.9455	14.2789	12.473	14.8052	15.0124	20.321	19.7316	17.3247	10.4477	8.3243	8.684	9.5944	9.8774	10.4376	12.3598	10.6995	13.1064	13.7969	27.1212	11.721	17.8503	14.7733
433	7.6451	12.4766	8.1677	10.4103	6.0764	13.3788	10.6622	14.6305	11.855	8.8004	10.7519	11.4924	11.5842	9.0283	14.0579	10.9434	9.4977	11.384	11.335	14.2288	11.4744	19.4835	19.3931	21.8818	15.6156	17.9905	15.6145	14.876	14.1654	12.4285	14.6882	14.9787	20.2591	19.6244	17.235	10.4035	8.262	8.5951	9.5423	9.7966	10.4146	12.3504	10.6874	13.0859	13.7701	27.0169	11.581	17.8862	14.7074
434	7.5524	12.3901	8.0549	10.2897	5.9735	13.2541	10.568	14.5519	11.796	8.7554	10.6797	11.3593	11.5046	8.9251	13.9766	10.9209	9.4639	11.3603	11.3806	14.2167	11.3707	19.3691	19.3003	21.8549	15.4725	17.8957	15.5966	14.757	14.0789	12.3807	14.5996	14.8885	20.0859	19.5095	17.1115	10.4073	8.1955	8.5534	9.5099	9.7373	10.4615	12.3854	10.7054	13.1014	13.7777	26.9121	11.4476	17.9443	14.6502
435	7.4555	12.2898	7.9341	10.1201	5.8412	13.1468	10.4162	14.4729	11.6924	8.6757	10.5793	11.1903	11.3895	8.7825	13.8572	10.8411	9.3972	11.2744	11.3129	14.1767	11.1884	19.2499	19.2464	21.7694	15.3667	17.8113	15.5118	14.5963	13.9529	12.2891	14.4813	14.7347	19.9589	19.3704	16.9459	10.3449	8.0994	8.4577	9.4325	9.6294	10.4724	12.3966	10.7373	13.0862	13.7818	26.8945	11.293	18.0705	14.5959
436	7.3638	12.1698	7.8285	9.9481	5.702	13.0267	10.2736	14.3348	11.5748	8.5998	10.4925	11.028	11.2912	8.638	13.6793	10.7954	9.3056	11.177	11.2328	14.1419	11.0041	19.0726	19.1011	21.6802	15.2366	17.6943	15.3725	14.4659	13.7984	12.1712	14.2994	14.6006	19.795	19.2085	16.7831	10.2313	7.9684	8.3408	9.3042	9.523	10.5012	12.4847	10.7439	13.0667	13.7824	26.8374	11.2061	18.1956	14.5433
437	7.2623	12.0445	7.7166	9.7369	5.5583	12.9142	10.1578	14.1915	11.5037	8.5707	10.4008	10.9212	11.1904	8.531	13.5487	10.7387	9.2542	11.1494	11.2107	14.1287	10.8303	18.8677	18.9249	21.5513	15.0926	17.5903	15.2829	14.3596	13.7067	12.0915	14.1636	14.5117	19.6564	19.0676	16.5697	10.1409	7.8737	8.2662	9.2223	9.452	10.5116	12.5111	10.6936	13.0699	13.7656	26.6237	11.0993	18.2421	14.4464
438	7.1768	11.9662	7.6831	9.615	5.4958	12.8274	10.0614	14.0723	11.4345	8.5252	10.325	10.8126	11.1058	8.4261	13.4032	10.6976	9.2178	11.1523	11.201	14.1081	10.7133	18.8056	18.8498	21.4389	15.0112	17.5201	15.2361	14.3475	13.6592	12.0315	14.045	14.4087	19.5885	18.9453	16.4653	10.0679	7.8026	8.1851	9.188	9.394	10.53	12.5587	10.6359	13.0645	13.7518	26.4729	11.0274	18.2807	14.3501
439	7.1133	11.8526	7.6212	9.5188	5.435	12.7625	10.0241	14.004	11.4031	8.4712	10.2336	10.7167	11.0278	8.3506	13.3263	10.6967	9.1798	11.1273	11.1851	14.1371	10.6231	18.7979	18.7902	21.349	14.9702	17.4343	15.2068	14.2959	13.6091	12.006	13.9594	14.3329	19.5098	18.8606	16.3895	10.0015	7.706	8.1221	9.1399	9.3446	10.5619	12.63	10.6204	13.0508	13.7697	26.395	10.9789	18.3665	14.3153
440	7.0713	11.784	7.5339	9.4351	5.3596	12.7073	9.9713	13.9518	11.3504	8.4553	10.1801	10.6244	10.9571	8.286	13.2402	10.6747	9.1558	11.1448	11.1817	14.1641	10.5467	18.707	18.71	21.2891	14.8941	17.3685	15.1646	14.2183	13.5666	11.9773	13.8877	14.264	19.4496	18.787	16.2999	9.9691	7.6623	8.0673	9.0999	9.2998	10.6159	12.7027	10.703	13.029	13.7542	26.3181	10.8869	18.465	14.2873
441	7.0106	11.749	7.4688	9.3594	5.2761	12.6448	9.9247	13.8678	11.3249	8.4251	10.156	10.5666	10.9138	8.2199	13.183	10.6735	9.1638	11.1429	11.181	14.1688	10.4371	18.6315	18.6052	21.2309	14.8415	17.358	15.1106	14.1602	13.5428	11.9298	13.7883	14.2291	19.4383	18.6998	16.2133	9.9554	7.6361	8.0405	9.0834	9.2996	10.6393	12.7306	10.6937	13.005	13.7463	26.2767	10.8003	18.5295	14.2547
442	6.9173	11.6873	7.4158	9.2489	5.1664	12.6176	9.8611	13.7877	11.3159	8.4198	10.1179	10.4937	10.8867	8.136	13.1239	10.6645	9.134	11.0989	11.188	14.1539	10.3422	18.5436	18.552	21.1036	14.7808	17.3229	15.0512	14.1045	13.5137	11.8841	13.6952	14.1592	19.3732	18.6263	16.1178	9.9412	7.5962	7.9845	9.0423	9.2587	10.6588	12.7876	10.6922	12.9785	13.7711	26.1985	10.7301	18.5873	14.1991
443	6.8759	11.5913	7.3844	9.1859	5.0958	12.6112	9.8121	13.7281	11.2755	8.3992	10.0643	10.463	10.8227	8.0896	13.093	10.6539	9.1055	11.0956	11.1898	14.154	10.2865	18.4554	18.5583	21.1196	14.7634	17.2613	15.0119	14.036	13.46	11.846	13.642	14.0709	19.3118	18.5559	16.0844	9.922	7.5523	7.9381	9.0116	9.2234	10.6975	12.824	10.7409	12.9733	13.7738	26.0918	10.6888	18.6445	14.1747
444	6.8719	11.5336	7.3339	9.1404	5.0548	12.587	9.8007	13.7162	11.215	8.3823	10.0412	10.426	10.7469	8.051	13.0584	10.6468	9.0931	11.1154	11.1962	14.1959	10.2704	18.3899	18.56	21.1972	14.7895	17.2292	14.9948	13.9578	13.4017	11.8368	13.5979	13.9874	19.3072	18.5156	16.0432	9.9036	7.5197	7.9164	8.9687	9.1819	10.7005	12.8549	10.7583	12.9873	13.8033	26.089	10.627	18.709	14.1854
445	6.8399	11.4877	7.2927	9.1162	4.9965	12.5334	9.7757	13.7305	11.1922	8.3498	10.0273	10.3727	10.7092	7.9869	13.0311	10.6609	9.0961	11.126	11.2118	14.22	10.2534	18.4238	18.5853	21.2216	14.7892	17.2407	14.997	13.9413	13.364	11.8107	13.5581	13.9366	19.2896	18.5104	16.0405	9.9092	7.4768	7.8737	8.9438	9.1641	10.7443	12.9277	10.8065	13.0445	13.8375	26.1506	10.5769	18.7983	14.209
446	6.8419	11.5003	7.3325	9.0942	4.9883	12.4457	9.6982	13.6526	11.1986	8.3595	10.0245	10.3421	10.7374	7.9727	13.0093	10.6955	9.1071	11.1351	11.2649	14.2499	10.301	18.4426	18.6372	21.288	14.8191	17.2555	14.9704	13.9847	13.3335	11.7885	13.5109	13.9122	19.3134	18.5163	16.0726	9.9213	7.4431	7.8814	8.9709	9.1776	10.7939	13.0065	10.741	13.0293	13.8639	26.1046	10.4904	18.823	14.1623
447	6.7954	11.4932	7.2808	9.0184	4.924	12.3893	9.6281	13.6197	11.1775	8.3299	9.9637	10.2687	10.7095	7.929	12.9436	10.6622	9.0741	11.1069	11.2602	14.2656	10.2335	18.4338	18.6306	21.27	14.8094	17.2318	14.892	13.991	13.3148	11.747	13.4824	13.8577	19.2908	18.4868	16.0029	9.8925	7.424	7.841	8.9397	9.1465	10.7922	13.0633	10.7141	13.0085	13.8495	26.0828	10.4609	18.878	14.1607
448	6.7278	11.4424	7.2265	8.929	4.8474	12.4221	9.6435	13.6771	11.1255	8.2718	9.8923	10.1738	10.6821	7.851	12.8772	10.636	9.0183	11.0509	11.231	14.2437	10.1547	18.4324	18.5611	21.2151	14.7733	17.1986	14.8473	13.938	13.2786	11.6988	13.495	13.7941	19.2344	18.3893	15.9262	9.8533	7.3638	7.7499	8.8653	9.1097	10.7819	13.0896	10.793	13.0513	13.9073	26.1244	10.5176	18.9626	14.2075
449	6.7145	11.4253	7.1743	8.8972	4.813	12.4399	9.6036	13.6632	11.1458	8.2441	9.8749	10.1283	10.6544	7.8014	12.8359	10.669	9.0004	11.0346	11.2485	14.2694	10.1228	18.4845	18.5379	21.1337	14.7181	17.1801	14.8524	13.9289	13.3092	11.6485	13.4956	13.7717	19.1788	18.3654	15.877	9.8566	7.3306	7.7306	8.8619	9.097	10.814	13.1398	10.7785	13.0932	13.9402	26.0953	10.5047	19.0432	14.2011
450	6.6801	11.4236	7.1511	8.8528	4.797	12.4851	9.604	13.6538	11.1596	8.2262	9.8763	10.1227	10.6143	7.7808	12.763	10.6484	8.994	11.0588	11.2373	14.3027	10.1297	18.4901	18.5389	21.1029	14.725	17.1498	14.8557	13.9374	13.3604	11.6398	13.4999	13.7444	19.1449	18.3655	15.8435	9.8485	7.3221	7.7242	8.8673	9.1065	10.8407	13.1703	10.7641	13.0981	13.9914	26.133	10.4831	19.1277	14.1957
451	6.6365	11.4661	7.1608	8.8037	4.7582	12.5083	9.6042	13.6437	11.1615	8.2288	9.9117	10.1018	10.6074	7.7479	12.776	10.6931	9.0207	11.0779	11.2453	14.3342	10.1241	18.469	18.548	21.1252	14.7452	17.1297	14.824	13.9722	13.391	11.6329	13.515	13.7398	19.1012	18.3667	15.8358	9.8589	7.2882	7.7307	8.8805	9.1184	10.8769	13.26	10.7874	13.1518	14.059	26.2033	10.4815	19.2068	14.2255
452	6.6606	11.5402	7.1715	8.857	4.7533	12.531	9.6551	13.695	11.179	8.2836	9.9652	10.1241	10.6592	7.8028	12.8594	10.7877	9.0863	11.1456	11.34	14.413	10.1955	18.5278	18.6276	21.2386	14.7983	17.1587	14.8681	14.0234	13.4092	11.6624	13.5549	13.7768	19.1613	18.4179	15.9048	9.9092	7.3349	7.7866	8.9596	9.1684	10.976	13.3329	10.8526	13.2511	14.1252	26.3733	10.5205	19.2748	14.3052
453	6.702	11.6135	7.2252	8.8987	4.7878	12.5238	9.6708	13.7202	11.1568	8.2936	9.9845	10.1638	10.6683	7.7935	12.9065	10.8183	9.1182	11.17	11.3949	14.4728	10.2764	18.6755	18.7302	21.407	14.8664	17.174	14.9056	14.0427	13.3756	11.6801	13.6051	13.7924	19.2457	18.509	15.9565	9.9247	7.36	7.7971	8.9783	9.1646	11.0614	13.4138	10.9236	13.3245	14.1814	26.5434	10.5508	19.4608	14.3808
454	6.6767	11.6191	7.2183	8.8723	4.7303	12.5063	9.6531	13.6835	11.1461	8.2725	9.9734	10.143	10.6463	7.7405	12.9088	10.8266	9.1331	11.1858	11.4346	14.4954	10.248	18.7157	18.7807	21.4763	14.8712	17.1439	14.9193	14.0394	13.3398	11.6776	13.6388	13.7526	19.2862	18.5503	15.9819	9.9186	7.3172	7.7659	8.9775	9.1824	11.1546	13.5377	11.0179	13.3355	14.2125	26.6397	10.5164	19.5546	14.4012
455	6.6632	11.6238	7.209	8.8598	4.6544	12.545	9.6689	13.7257	11.2133	8.2814	9.98	10.1208	10.6691	7.7417	12.917	10.8571	9.1565	11.2198	11.4622	14.54	10.2275	18.7313	18.8041	21.4496	14.9039	17.1555	14.9388	14.0838	13.3407	11.6906	13.6575	13.7465	19.348	18.586	16.0328	9.9343	7.2986	7.7706	9.0202	9.2236	11.1958	13.6358	11.0769	13.3477	14.2544	26.6997	10.4988	19.595	14.436
456	6.6313	11.5796	7.1705	8.795	4.6126	12.5572	9.6825	13.7614	11.2401	8.2627	9.9797	10.1029	10.6853	7.7392	12.942	10.8717	9.1471	11.2179	11.5019	14.553	10.1779	18.6933	18.7496	21.4116	14.8975	17.1249	14.9506	14.1192	13.3126	11.677	13.6484	13.7329	19.3579	18.6459	16.0384	9.9412	7.3036	7.7699	9.0374	9.2411	11.1845	13.6928	11.0925	13.3426	14.3069	26.7408	10.452	19.6243	14.4551
457	6.6396	11.6022	7.1922	8.7795	4.6387	12.6254	9.7211	13.8173	11.2669	8.2767	9.9884	10.1236	10.7201	7.7365	12.992	10.91	9.1678	11.2442	11.5655	14.6215	10.2076	18.7621	18.7762	21.4597	14.931	17.1038	14.9946	14.1636	13.3063	11.6695	13.6592	13.7291	19.3838	18.7126	16.0952	9.9797	7.3017	7.7974	9.0664	9.2609	11.2134	13.7925	11.1433	13.4084	14.4165	26.8483	10.4547	19.7609	14.4915
458	6.6444	11.6651	7.2415	8.8307	4.649	12.6711	9.7442	13.9345	11.3283	8.3243	10.0097	10.1455	10.7584	7.7297	13.0336	10.977	9.2084	11.2773	11.6082	14.6931	10.2427	18.8787	18.854	21.5461	14.968	17.1644	15.0355	14.2061	13.3934	11.6758	13.6798	13.7489	19.4912	18.785	16.1725	10.0094	7.3218	7.8082	9.0899	9.3003	11.3025	13.8873	11.2323	13.4704	14.4714	26.9705	10.4858	19.9236	14.5326
459	6.6111	11.7022	7.2136	8.803	4.5612	12.7075	9.7846	14.0194	11.358	8.344	10.002	10.1249	10.7753	7.7147	13.0347	10.9997	9.2199	11.3032	11.6177	14.7236	10.2315	18.9029	18.8615	21.5631	14.9783	17.2064	15.0919	14.237	13.3942	11.6761	13.7315	13.7459	19.5424	18.835	16.1956	10.021	7.3014	7.7981	9.101	9.3183	11.388	13.9628	11.3089	13.4796	14.4729	27.0531	10.5118	19.9614	14.5438
460	6.6285	11.7332	7.2053	8.7939	4.5437	12.7035	9.811	14.0735	11.3817	8.3535	10.0095	10.094	10.7987	7.713	13.0197	10.9998	9.2373	11.3223	11.6581	14.7412	10.2418	18.9374	18.8981	21.6204	15.0065	17.2401	15.1087	14.266	13.416	11.6814	13.8027	13.7393	19.562	18.8623	16.2085	10.052	7.2914	7.7893	9.1199	9.3255	11.4706	14.0413	11.3676	13.5479	14.5374	27.1118	10.5518	20.033	14.589
461	6.5855	11.7221	7.1908	8.772	4.5033	12.743	9.828	14.1281	11.392	8.3568	10.019	10.1056	10.7985	7.699	13.0398	11.0398	9.2466	11.3355	11.7238	14.7816	10.2195	18.9145	18.9244	21.6507	15.0439	17.2628	15.1368	14.2985	13.4397	11.6684	13.8467	13.7411	19.5972	18.9134	16.2515	10.0732	7.2906	7.7938	9.1378	9.3445	11.5202	14.1019	11.4169	13.5665	14.5766	27.112	10.5681	20.0954	14.6172
462	6.5963	11.7519	7.1906	8.7853	4.5026	12.8066	9.8481	14.2179	11.4594	8.3812	10.082	10.1319	10.8371	7.7037	13.0888	11.0975	9.2815	11.3812	11.8244	14.8594	10.2712	18.917	18.9893	21.7223	15.0826	17.3362	15.197	14.3738	13.5488	11.6973	13.9043	13.7892	19.6454	18.9737	16.3047	10.1181	7.3393	7.8282	9.1816	9.3938	11.5606	14.2136	11.4994	13.6418	14.6596	27.1665	10.6101	20.1917	14.6679
463	6.6323	11.8183	7.2338	8.8135	4.5186	12.9082	9.917	14.3096	11.5371	8.428	10.1681	10.1715	10.915	7.7313	13.1713	11.182	9.3435	11.4609	11.8892	14.9733	10.3452	18.9943	19.0604	21.7611	15.1511	17.4182	15.2571	14.4733	13.6734	11.75	14.0063	13.8313	19.7336	19.0718	16.3824	10.1622	7.399	7.8882	9.2659	9.4592	11.6207	14.3064	11.5873	13.7567	14.7499	27.3053	10.6831	20.311	14.7227
464	6.6603	11.8397	7.2773	8.8459	4.5331	12.999	9.9762	14.3468	11.5876	8.4982	10.2269	10.1866	11.0246	7.769	13.2163	11.2518	9.4071	11.5106	11.9525	15.0543	10.4076	19.1257	19.1335	21.7956	15.2008	17.4949	15.3233	14.5329	13.7575	11.806	14.0818	13.8549	19.8069	19.1748	16.503	10.2001	7.4441	7.9272	9.3386	9.5254	11.7286	14.4188	11.6807	13.8115	14.8089	27.4466	10.7348	20.4292	14.7767
465	6.6627	11.8289	7.3147	8.8488	4.5073	13.0524	9.9996	14.3697	11.622	8.523	10.2559	10.199	11.086	7.7593	13.2518	11.2751	9.4308	11.5258	12.0097	15.0878	10.4296	19.1679	19.2225	21.8676	15.2299	17.5599	15.3874	14.5591	13.7738	11.8334	14.1648	13.8926	19.8909	19.2735	16.6265	10.2355	7.4469	7.9641	9.337	9.5627	11.8054	14.5051	11.7501	13.9148	14.8715	27.6168	10.7624	20.5719	14.8311
466	6.6655	11.8389	7.3345	8.8404	4.4807	13.0703	10.027	14.3972	11.6791	8.5354	10.2845	10.2209	11.1075	7.7421	13.3054	11.3379	9.4875	11.5656	12.0562	15.1229	10.442	19.2472	19.2534	21.925	15.2631	17.6147	15.4492	14.5912	13.8	11.8465	14.2562	13.9158	19.931	19.3399	16.6899	10.2914	7.4614	7.9779	9.3832	9.6072	11.8649	14.6243	11.8273	13.9776	14.9226	27.7256	10.8041	20.6851	14.8708
467	6.6714	11.8572	7.3304	8.8336	4.4534	13.082	10.052	14.4219	11.7207	8.5513	10.2948	10.2363	11.1462	7.7353	13.3546	11.3872	9.5204	11.6169	12.1264	15.1696	10.4469	19.38	19.2759	21.9904	15.2839	17.677	15.4937	14.6059	13.8177	11.8592	14.3194	13.8894	19.9257	19.4109	16.7282	10.3312	7.4608	8.0079	9.433	9.6564	11.9555	14.7487	11.8846	14.0547	15.0011	27.8109	10.8565	20.764	14.9404
468	6.6664	11.8099	7.3116	8.8409	4.4237	13.129	10.0898	14.471	11.7531	8.5754	10.3251	10.2551	11.2108	7.7169	13.4002	11.4388	9.5634	11.6678	12.2002	15.218	10.4486	19.4799	19.2955	22.0318	15.3345	17.7623	15.5602	14.6443	13.8694	11.9099	14.3719	13.8923	19.9296	19.4895	16.7703	10.3897	7.4915	8.052	9.4641	9.7138	12.001	14.7927	11.9167	14.111	15.0823	27.8728	10.8971	20.8351	14.9962
469	6.6551	11.8144	7.283	8.8273	4.388	13.1247	10.1157	14.5433	11.7764	8.5966	10.3253	10.2639	11.2117	7.7131	13.4073	11.4756	9.5959	11.6907	12.2412	15.268	10.466	19.4806	19.2988	22.1209	15.3592	17.7963	15.5973	14.6695	13.8662	11.9189	14.3736	13.9111	19.9679	19.5453	16.7791	10.4031	7.4907	8.058	9.4656	9.7741	12.0718	14.8393	11.9742	14.1175	15.1158	27.925	10.9082	20.8931	15.0411
470	6.6854	11.8675	7.2907	8.8218	4.363	13.1498	10.1623	14.6425	11.8187	8.6144	10.3781	10.2776	11.2128	7.7361	13.4491	11.5372	9.6215	11.699	12.3166	15.3467	10.4714	19.5481	19.3522	22.2451	15.4019	17.8151	15.681	14.7101	13.8533	11.9542	14.4243	13.9199	20.0335	19.645	16.8286	10.4314	7.4983	8.1079	9.4991	9.8304	12.1443	14.9212	12.0345	14.1764	15.1794	28.0506	10.8978	20.9738	15.1189
471	6.6973	11.8967	7.2994	8.7908	4.338	13.2045	10.1937	14.7325	11.876	8.6452	10.4284	10.3071	11.1821	7.7415	13.4819	11.5717	9.6537	11.7437	12.3897	15.4366	10.4307	19.6029	19.4233	22.3016	15.4039	17.8301	15.7354	14.7728	13.8559	11.9887	14.4845	13.9539	20.1056	19.7398	16.8887	10.4819	7.528	8.1553	9.5547	9.8726	12.1755	14.9697	12.0841	14.204	15.2384	28.2065	10.8942	20.9936	15.1557
472	6.6758	11.9075	7.3058	8.775	4.3099	13.2627	10.2316	14.7929	11.9159	8.6996	10.4813	10.3184	11.1453	7.752	13.5108	11.6277	9.667	11.7927	12.4652	15.5178	10.4001	19.6709	19.526	22.3872	15.4038	17.8483	15.7702	14.8303	13.8842	12.0088	14.5076	13.9956	20.1635	19.8781	16.9512	10.5291	7.5556	8.171	9.5969	9.9037	12.1999	15.0214	12.1181	14.1908	15.2819	28.3355	10.8431	21.0253	15.199
473	6.6774	11.8953	7.3287	8.7592	4.2857	13.299	10.2651	14.8568	11.9606	8.7466	10.5382	10.3258	11.1318	7.7696	13.5277	11.701	9.7164	11.8384	12.5475	15.5978	10.3887	19.7071	19.6343	22.4476	15.42	17.8707	15.7859	14.8819	13.9291	12.0426	14.5255	14.026	20.2428	19.9733	16.9733	10.5858	7.5778	8.2044	9.6488	9.9557	12.2681	15.1019	12.1805	14.2442	15.3441	28.453	10.8075	21.0835	15.2778
474	6.7094	11.8966	7.3594	8.7693	4.2792	13.3288	10.2757	14.9209	11.971	8.7704	10.5591	10.3306	11.1502	7.7515	13.5408	11.7426	9.7709	11.8533	12.6095	15.6511	10.403	19.8015	19.7692	22.5332	15.4879	17.8695	15.7896	14.9184	13.9564	12.0594	14.5227	14.0353	20.3114	20.02	16.9763	10.6134	7.5986	8.2322	9.6921	10.0035	12.3337	15.1799	12.2502	14.3269	15.4267	28.5997	10.7922	21.1575	15.4074
475	6.7265	11.9153	7.3857	8.7847	4.2905	13.3449	10.2913	14.9486	11.9742	8.7865	10.5925	10.3511	11.1525	7.7444	13.5623	11.7797	9.8003	11.8708	12.6744	15.6936	10.4337	19.9051	19.8772	22.605	15.5404	17.8528	15.8028	14.9428	13.9516	12.0881	14.5411	14.0485	20.3472	20.0781	16.9939	10.6387	7.6125	8.2635	9.7383	10.021	12.3929	15.257	12.3068	14.3783	15.4833	28.7513	10.7707	21.2223	15.4881
476	6.7623	12.0067	7.4189	8.8084	4.2915	13.3305	10.2819	14.9465	11.9637	8.7862	10.617	10.3496	11.1491	7.7377	13.5762	11.8204	9.8145	11.9195	12.7431	15.7297	10.4396	20.029	20.0111	22.6952	15.5885	17.8432	15.8156	14.959	13.908	12.091	14.5131	14.0537	20.3816	20.135	17.0082	10.6555	7.6322	8.2815	9.7758	10.0326	12.4421	15.3368	12.3453	14.3961	15.5498	28.8776	10.7562	21.3096	15.5965
477	6.778	12.0658	7.422	8.8182	4.2592	13.3104	10.2675	14.9021	11.9563	8.7793	10.6465	10.3505	11.1539	7.7098	13.5778	11.876	9.8351	11.9479	12.7987	15.7577	10.4508	20.1076	20.1043	22.7717	15.602	17.8585	15.8389	14.9739	13.8681	12.0817	14.4796	14.0262	20.39	20.1833	17.0358	10.6886	7.6422	8.3047	9.8123	10.0547	12.4889	15.382	12.3814	14.4239	15.5941	28.9488	10.7335	21.3308	15.6576
478	6.8175	12.1011	7.4371	8.8072	4.2407	13.3374	10.2992	14.8792	11.9672	8.8233	10.6932	10.3552	11.1845	7.7064	13.618	11.9317	9.8748	11.959	12.8441	15.8279	10.4631	20.1592	20.1648	22.8433	15.6465	17.901	15.848	14.989	13.8789	12.0815	14.4656	14.0424	20.4328	20.2595	17.0626	10.7549	7.6629	8.3623	9.8414	10.0907	12.5275	15.4505	12.4348	14.4749	15.6518	28.9867	10.7475	21.3754	15.7362
479	6.8233	12.0234	7.4419	8.772	4.2268	13.3675	10.3185	14.8121	11.9593	8.8547	10.6984	10.3453	11.228	7.6691	13.637	11.9658	9.9128	11.9827	12.8992	15.868	10.4614	20.1156	20.1583	22.7857	15.665	17.9183	15.832	14.9768	13.9102	12.0857	14.4483	14.0657	20.4373	20.3251	17.0671	10.7876	7.6817	8.4357	9.8707	10.1405	12.5855	15.5079	12.439	14.5008	15.6921	28.9142	10.7553	21.4157	15.7625
480	6.7862	11.9078	7.4164	8.725	4.1869	13.3674	10.316	14.7382	11.9392	8.8659	10.6922	10.3245	11.2448	7.6179	13.6159	11.9927	9.929	11.9757	12.9539	15.8689	10.4104	20.0268	20.1321	22.6697	15.6411	17.9248	15.8317	14.9566	13.8925	12.0876	14.4326	14.0535	20.3813	20.3662	17.0648	10.7902	7.6824	8.4561	9.8919	10.1825	12.6321	15.5635	12.4542	14.5134	15.7104	28.7938	10.7311	21.3997	15.7585
481	6.78	11.9247	7.4204	8.6932	4.1494	13.3807	10.3236	14.7195	11.9245	8.8826	10.7192	10.2843	11.2862	7.6004	13.6069	12.0416	9.9633	11.9899	13.0091	15.8634	10.3913	20.0106	20.1272	22.6801	15.6761	17.9552	15.8654	14.935	13.8848	12.1101	14.4504	14.0666	20.3703	20.3781	17.1001	10.8526	7.6951	8.4699	9.9385	10.2214	12.6235	15.5639	12.4116	14.559	15.7808	28.8418	10.7205	21.4417	15.7892
482	6.8199	12.0078	7.4404	8.6735	4.1291	13.3607	10.356	14.702	11.9062	8.9143	10.7456	10.2651	11.3201	7.5787	13.5826	12.0973	9.9934	12.0317	13.0582	15.8653	10.3969	20.0647	20.1621	22.7363	15.7076	17.9683	15.8929	14.9319	13.856	12.1168	14.4733	14.0677	20.3829	20.4233	17.1205	10.8911	7.7212	8.5282	9.9736	10.2469	12.6505	15.593	12.4395	14.6032	15.8409	28.871	10.7183	21.4563	15.8387
483	6.8394	12.0516	7.4362	8.6465	4.0953	13.3125	10.3745	14.6849	11.877	8.9486	10.7687	10.2725	11.3039	7.5522	13.5859	12.1623	10.0263	12.0562	13.0973	15.8964	10.3709	20.1098	20.2094	22.7205	15.765	17.9616	15.8692	14.938	13.8279	12.1069	14.4449	14.0106	20.3693	20.4421	17.1032	10.9199	7.7406	8.5902	10.0011	10.3011	12.6929	15.6262	12.5045	14.5925	15.8103	28.7917	10.7023	21.4556	15.8617
484	6.8393	12.0259	7.4447	8.6346	4.0739	13.2659	10.3655	14.6966	11.864	8.9671	10.8068	10.2669	11.2599	7.5099	13.5931	12.2021	10.0485	12.0742	13.1312	15.9316	10.3399	20.2063	20.3077	22.7318	15.8406	17.9385	15.8451	14.9465	13.7536	12.1036	14.4149	13.9693	20.3457	20.4832	17.0837	10.9574	7.7377	8.6025	10.034	10.3381	12.7331	15.6738	12.5244	14.6243	15.8334	28.7728	10.6611	21.5076	15.9528
485	6.8492	12.0083	7.4648	8.6316	4.0682	13.2354	10.3595	14.7373	11.8711	8.9824	10.8551	10.2473	11.2271	7.4786	13.584	12.2731	10.0885	12.0977	13.1905	15.9808	10.3304	20.375	20.4005	22.823	15.926	17.9242	15.8396	14.9518	13.6577	12.1145	14.3998	13.9795	20.3341	20.5599	17.0932	10.9979	7.7478	8.6407	10.0778	10.389	12.7902	15.7328	12.5485	14.6511	15.9093	28.7957	10.5992	21.5567	16.0831
486	6.9083	12.0129	7.4996	8.6287	4.0733	13.2092	10.3637	14.7766	11.8452	9.0138	10.9124	10.2394	11.1716	7.4666	13.571	12.3307	10.1045	12.1192	13.2824	16.0158	10.3432	20.5091	20.536	22.9466	16.004	17.915	15.8216	14.9543	13.6521	12.126	14.3955	13.975	20.2918	20.6151	17.1153	11.0422	7.7682	8.6856	10.1273	10.4333	12.8468	15.804	12.6082	14.7358	15.9797	28.8234	10.5831	21.5984	16.194
487	6.9621	12.0166	7.5411	8.6075	4.0604	13.2083	10.3834	14.7978	11.832	9.0651	10.9414	10.2342	11.1444	7.4373	13.5795	12.3987	10.1144	12.1516	13.373	16.0829	10.3365	20.5868	20.6377	23.0336	16.0359	17.8944	15.8153	14.9149	13.6668	12.1845	14.3766	13.9643	20.2676	20.6513	17.0829	11.0756	7.7968	8.7447	10.1776	10.4794	12.9094	15.886	12.6625	14.8051	16.0116	28.8865	10.5851	21.6763	16.2887
488	6.9986	11.9943	7.5568	8.5525	4.0372	13.2085	10.4015	14.8144	11.8106	9.1143	10.9904	10.2273	11.1648	7.4193	13.5821	12.4663	10.1593	12.1604	13.418	16.135	10.305	20.6248	20.6566	23.0284	16.0245	17.8752	15.8107	14.8933	13.642	12.2172	14.3472	13.9459	20.2635	20.6872	17.0764	11.1331	7.8397	8.8007	10.2003	10.5219	12.9004	15.8896	12.6554	14.8066	16.0246	28.9013	10.5712	21.6834	16.3352
489	7.0133	12.0366	7.5913	8.5368	4.0221	13.1922	10.4025	14.8523	11.812	9.1632	11.0324	10.2056	11.1915	7.3853	13.5868	12.5132	10.2018	12.1698	13.4732	16.1683	10.2705	20.6392	20.6865	23.0016	16.0471	17.8214	15.8185	14.8743	13.6108	12.2685	14.2752	13.9101	20.225	20.7265	17.076	11.1736	7.8668	8.8689	10.2538	10.5504	12.9609	15.8988	12.6534	14.8136	16.0519	28.9182	10.5567	21.707	16.3649
490	7.0299	11.9932	7.5886	8.5098	4.0055	13.1798	10.4039	14.8068	11.7928	9.1806	11.0635	10.1675	11.2085	7.3539	13.5527	12.5433	10.2543	12.1902	13.5467	16.1705	10.2275	20.6365	20.6852	22.8997	16.0658	17.785	15.8207	14.8648	13.578	12.2787	14.2243	13.8666	20.216	20.7145	17.0596	11.1871	7.8748	8.9185	10.291	10.576	12.9782	15.9016	12.6839	14.8348	16.0905	28.8159	10.5171	21.7085	16.4069
491	7.0256	11.8756	7.5679	8.4336	3.9473	13.1183	10.3963	14.7697	11.7703	9.2172	11.083	10.1162	11.2218	7.3091	13.5231	12.5795	10.2803	12.1981	13.6183	16.1794	10.1435	20.5664	20.6477	22.7706	16.0288	17.8026	15.8403	14.8612	13.5742	12.3037	14.1895	13.8279	20.2146	20.723	17.0485	11.2178	7.8841	8.9738	10.3367	10.6365	13.0135	15.8887	12.746	14.8265	16.0893	28.6471	10.4174	21.6583	16.3886
492	7.0144	11.7999	7.5608	8.3493	3.8871	13.072	10.3653	14.7513	11.7705	9.2532	11.1078	10.0699	11.2497	7.2585	13.506	12.6377	10.2975	12.2223	13.674	16.2371	10.0745	20.5077	20.6472	22.6889	16.0272	17.7747	15.8623	14.85	13.5942	12.3465	14.1863	13.8112	20.2012	20.7741	17.0268	11.2846	7.9132	8.9923	10.366	10.7115	13.0548	15.9662	12.7932	14.8448	16.1074	28.6117	10.3715	21.6266	16.4102
493	7.0575	11.7721	7.5869	8.3046	3.8844	13.0551	10.3972	14.6938	11.7787	9.3301	11.1681	10.0619	11.278	7.2389	13.5359	12.7266	10.3551	12.2929	13.7541	16.3045	10.0454	20.5573	20.7075	22.6947	16.0704	17.7796	15.8896	14.8211	13.5876	12.4022	14.2037	13.829	20.2442	20.8278	17.0942	11.3638	7.9536	9.0693	10.4395	10.799	13.107	16.0551	12.8165	14.8846	16.1263	28.6017	10.3515	21.6271	16.4812
494	7.1033	11.7707	7.6189	8.3092	3.8722	13.0254	10.4166	14.6012	11.7773	9.3921	11.2498	10.0806	11.2656	7.2246	13.5488	12.8162	10.4351	12.3508	13.8595	16.3679	10.0418	20.6657	20.7921	22.799	16.1546	17.8002	15.9061	14.8182	13.5713	12.4578	14.1666	13.8636	20.2803	20.9017	17.1122	11.4194	8.0192	9.1655	10.5263	10.8848	13.1619	16.0714	12.8478	14.9344	16.1947	28.5606	10.3082	21.7022	16.6321
495	7.1495	11.7144	7.6568	8.2545	3.8547	13.0137	10.417	14.5313	11.7711	9.4622	11.3078	10.1148	11.2418	7.2187	13.5385	12.9221	10.5198	12.4116	13.9728	16.4481	10.0017	20.712	20.8389	22.8745	16.2019	17.8229	15.9225	14.8249	13.5583	12.5236	14.1089	13.8891	20.3013	20.9704	17.1046	11.4931	8.0882	9.2621	10.5999	10.9622	13.2338	16.1108	12.9175	14.9435	16.2692	28.4655	10.268	21.7141	16.7237
496	7.2049	11.629	7.6827	8.2122	3.8441	13.0113	10.4242	14.4603	11.7941	9.5188	11.3572	10.1256	11.1711	7.2019	13.4994	13.0348	10.582	12.4551	14.0656	16.5045	9.9696	20.7288	20.8829	22.9102	16.2107	17.8482	15.9442	14.7842	13.5051	12.5718	14.0466	13.9299	20.3398	21.0198	17.1286	11.557	8.1266	9.3292	10.6631	11.0045	13.2697	16.17	12.967	14.9412	16.3048	28.4907	10.2449	21.7122	16.7947
497	7.2421	11.5551	7.722	8.2163	3.8434	12.978	10.4174	14.4128	11.7832	9.5579	11.4336	10.1029	11.0968	7.1706	13.4847	13.1186	10.6435	12.4643	14.1596	16.5611	9.9617	20.7747	20.9611	22.9566	16.2503	17.847	15.9183	14.7096	13.4059	12.5953	13.9677	13.9123	20.3627	21.071	17.1408	11.5823	8.1583	9.3974	10.7336	11.0614	13.366	16.246	13.0553	14.9894	16.319	28.5366	10.2073	21.7902	16.881
498	7.257	11.555	7.7317	8.1811	3.8033	12.9472	10.4374	14.391	11.745	9.6103	11.4776	10.0895	11.0502	7.1332	13.4431	13.1862	10.7213	12.4712	14.2439	16.6233	9.9123	20.8318	21.0422	22.9997	16.222	17.8464	15.9323	14.6631	13.3125	12.6246	13.8702	13.8843	20.3413	21.0886	17.14	11.6545	8.1881	9.4834	10.7825	11.1129	13.4842	16.3425	13.1694	15.03	16.33	28.519	10.1196	21.8206	16.9639
499	7.2831	11.5538	7.7133	8.1076	3.7557	12.8874	10.4189	14.3568	11.6921	9.6478	11.5048	10.0587	11.0128	7.062	13.3677	13.2339	10.7444	12.4806	14.2681	16.6358	9.8257	20.8244	21.1145	22.9917	16.2076	17.8202	15.8873	14.6062	13.164	12.6487	13.7479	13.8304	20.305	21.0727	17.0779	11.7041	8.1994	9.5393	10.8188	11.1222	13.5247	16.425	13.2455	15.0441	16.3114	28.4507	10.0339	21.8442	17.0125
500	7.303	11.5146	7.706	8.0674	3.7236	12.8497	10.4113	14.3557	11.6557	9.6978	11.5279	10.033	10.9784	7.0018	13.3304	13.2727	10.7612	12.4851	14.3062	16.6537	9.7869	20.7983	21.1329	22.9629	16.2231	17.8276	15.889	14.5599	13.0519	12.6617	13.6561	13.8057	20.2514	21.0973	17.0387	11.7397	8.2133	9.5989	10.8427	11.1221	13.5519	16.4676	13.2603	15.0373	16.3138	28.388	9.9769	21.8588	17.0268
501	7.3586	11.4419	7.7173	8.0183	3.6825	12.785	10.3875	14.3963	11.6379	9.7905	11.5789	10.0218	10.9666	6.9665	13.3207	13.3481	10.8323	12.5208	14.42	16.6908	9.7187	20.8076	21.1851	22.9713	16.2304	17.8473	15.9126	14.49	12.9657	12.7066	13.6375	13.8187	20.2528	21.142	17.0194	11.8034	8.2459	9.6957	10.9137	11.1767	13.6156	16.512	13.2856	15.0763	16.3583	28.3588	9.91	21.8745	17.088
502	7.3843	11.3657	7.7162	7.9572	3.6474	12.7792	10.3746	14.4638	11.6261	9.8787	11.6232	10.0162	10.9909	6.9397	13.3482	13.4715	10.9088	12.5842	14.5386	16.7749	9.6579	20.7819	21.1972	22.9572	16.2281	17.8693	15.9346	14.4533	12.9186	12.7538	13.6061	13.8581	20.2735	21.1983	17.0276	11.8884	8.2973	9.7884	10.9855	11.2796	13.6707	16.5396	13.3141	15.0992	16.4122	28.2985	9.8382	21.8816	17.1447
503	7.3957	11.3304	7.7122	7.8881	3.6028	12.7314	10.3566	14.4677	11.5858	9.955	11.6409	9.9843	10.9836	6.8792	13.3356	13.545	10.9685	12.5928	14.6354	16.8192	9.5787	20.7455	21.1859	22.9375	16.2438	17.8926	15.93	14.4093	12.8178	12.7849	13.496	13.8521	20.2473	21.2093	16.9986	11.9552	8.3394	9.8663	11.0565	11.3373	13.6971	16.5762	13.3138	15.0736	16.4083	28.189	9.7604	21.8855	17.2266
504	7.444	11.3121	7.7435	7.8541	3.5916	12.6871	10.3289	14.4734	11.5805	10.0345	11.7181	9.9699	10.9869	6.8473	13.3467	13.6407	11.0248	12.6247	14.728	16.8659	9.5108	20.7653	21.224	22.9253	16.2372	17.8925	15.9527	14.3847	12.7337	12.8268	13.403	13.8208	20.2513	21.2304	16.9893	12.0195	8.377	9.9732	11.103	11.3954	13.7284	16.5839	13.3369	15.09	16.3745	28.094	9.688	21.9144	17.3196
505	7.4987	11.2621	7.7498	7.8071	3.5689	12.6759	10.3152	14.4803	11.5652	10.1382	11.8085	9.9469	10.9725	6.8146	13.3687	13.7666	11.1034	12.6719	14.8593	16.9296	9.4331	20.7799	21.2533	22.9143	16.2251	17.8641	16.0099	14.3398	12.6773	12.9036	13.3861	13.8333	20.2913	21.3149	17.044	12.0845	8.4525	10.0895	11.1701	11.4971	13.7491	16.645	13.4371	15.1037	16.3865	28.0269	9.6174	21.9306	17.3796
506	7.5283	11.2236	7.7907	7.7649	3.5246	12.6708	10.316	14.4623	11.5542	10.2322	11.8817	9.9438	10.9501	6.7722	13.3777	13.8818	11.2019	12.7296	14.9894	17.0394	9.3817	20.8484	21.3415	22.9628	16.2626	17.881	16.083	14.3292	12.6284	12.9719	13.3828	13.8713	20.3493	21.3831	17.0822	12.1741	8.5116	10.2236	11.2387	11.593	13.778	16.6534	13.4858	15.1102	16.4023	28.0005	9.5685	21.9538	17.4563
507	7.5622	11.1747	7.8367	7.7124	3.4825	12.6521	10.3215	14.4274	11.5805	10.3342	11.9766	9.954	10.9165	6.7433	13.3977	13.9843	11.2753	12.8087	15.1149	17.1446	9.3307	20.9113	21.3804	22.9638	16.2971	17.9011	16.1267	14.3442	12.615	13.0444	13.4015	13.9149	20.418	21.4011	17.0887	12.2516	8.5709	10.3478	11.334	11.7032	13.8452	16.6952	13.5656	15.1339	16.4515	27.9644	9.5106	21.98	17.5369
508	7.6163	11.1385	7.8814	7.668	3.4604	12.6475	10.3396	14.3868	11.594	10.438	12.072	9.9752	10.9076	6.7406	13.3892	14.1057	11.3772	12.8872	15.2243	17.2328	9.2877	20.9814	21.3933	22.9709	16.3442	17.9227	16.1666	14.3163	12.6567	13.1246	13.3803	13.9244	20.4729	21.4387	17.1081	12.3644	8.6504	10.4745	11.4545	11.8073	13.9222	16.7948	13.6511	15.2107	16.5108	27.8977	9.4779	21.995	17.6278
509	7.6612	11.0819	7.9077	7.6389	3.4385	12.6411	10.3639	14.3005	11.5958	10.5615	12.1474	9.982	10.8774	6.7322	13.3725	14.2456	11.4681	12.9529	15.3533	17.2979	9.2416	20.9736	21.4361	22.9288	16.3393	17.9224	16.1916	14.2522	12.6523	13.2236	13.3367	13.9454	20.5394	21.4986	17.1019	12.474	8.7349	10.6014	11.5576	11.8891	13.9978	16.8839	13.7259	15.2794	16.514	27.8671	9.4446	21.9866	17.7075
510	7.7254	11.04	7.9579	7.6226	3.4256	12.6741	10.4072	14.2105	11.6072	10.6789	12.2414	9.9837	10.8464	6.7069	13.3567	14.3747	11.568	13.0117	15.5053	17.4045	9.2053	21.0105	21.5169	22.9453	16.3821	17.9169	16.2779	14.2333	12.5819	13.3046	13.331	13.9611	20.6228	21.5817	17.1224	12.5665	8.801	10.7286	11.6392	11.9653	14.0905	16.9557	13.8283	15.3223	16.5336	27.929	9.4157	22.0302	17.7629
511	7.7748	11.019	7.9972	7.5878	3.3809	12.6994	10.4294	14.1268	11.6242	10.7886	12.335	9.9831	10.8428	6.6786	13.3688	14.4651	11.6547	13.0741	15.6337	17.4963	9.1397	21.0732	21.6194	23.0422	16.4021	17.9259	16.3356	14.2466	12.5181	13.4039	13.3026	13.984	20.6882	21.6614	17.138	12.6953	8.8875	10.8985	11.7448	12.0264	14.189	17.0333	13.9158	15.3422	16.6213	28.0185	9.393	22.0807	17.8663
512	7.8425	11.0349	8.0424	7.5954	3.3757	12.7035	10.4447	14.1122	11.6399	10.8636	12.4137	9.9941	10.8652	6.6685	13.3798	14.5488	11.7438	13.1261	15.7271	17.5681	9.1175	21.1855	21.7314	23.1399	16.4832	17.9504	16.3917	14.2549	12.5027	13.4669	13.3045	14.0195	20.7491	21.709	17.1705	12.7639	8.9596	11.0397	11.8342	12.0876	14.2561	17.0919	14.0076	15.3865	16.7088	28.0998	9.4152	22.1566	17.9756
513	7.8992	11.0632	8.0825	7.5688	3.3707	12.6958	10.468	14.0756	11.6229	10.9602	12.4887	10.0058	10.8829	6.6423	13.3806	14.6646	11.8305	13.1776	15.8579	17.6607	9.0858	21.2535	21.8572	23.2067	16.5668	17.9846	16.4245	14.2447	12.4697	13.5156	13.2685	14.0224	20.7972	21.7624	17.1806	12.839	9.0316	11.1963	11.9403	12.1964	14.3234	17.1897	14.0775	15.4408	16.7819	28.1015	9.4055	22.2353	18.1485
514	7.9755	11.0674	8.117	7.5465	3.3558	12.7171	10.4988	14.0707	11.6358	11.0801	12.5671	10.0278	10.9026	6.634	13.4001	14.8112	11.9151	13.2349	16.0329	17.7455	9.0411	21.3068	21.9379	23.2147	16.5961	18.0718	16.5005	14.2513	12.432	13.6036	13.206	14.0299	20.8697	21.8624	17.1926	12.9192	9.1219	11.3367	12.0458	12.3251	14.387	17.2391	14.1288	15.5167	16.813	28.0558	9.357	22.2827	18.2503
515	8.0329	11.0505	8.1573	7.5292	3.333	12.7058	10.5089	14.0995	11.6335	11.1435	12.6436	10.0273	10.8974	6.5975	13.4145	14.9302	11.9755	13.2868	16.1442	17.8124	9.011	21.3649	21.9683	23.2443	16.6234	18.1033	16.5344	14.2372	12.4028	13.6728	13.1421	14.0407	20.9155	21.9601	17.1792	12.9917	9.1881	11.4588	12.1083	12.4303	14.4564	17.2721	14.1925	15.572	16.8465	28.0502	9.3267	22.3209	18.3282
516	8.0968	11.0767	8.1875	7.5318	3.3157	12.6866	10.5474	14.1409	11.6385	11.2481	12.7391	10.0534	10.8839	6.5594	13.4534	15.0105	12.0597	13.354	16.2473	17.8915	8.9979	21.4511	22.0183	23.3329	16.6607	18.1364	16.563	14.2179	12.396	13.7346	13.1422	14.0704	20.9566	22.0535	17.1982	13.0705	9.2549	11.6079	12.2051	12.5381	14.502	17.3044	14.264	15.6249	16.9017	28.0898	9.3138	22.3593	18.452
517	8.1721	11.1086	8.2393	7.5173	3.3122	12.7184	10.5929	14.2506	11.6543	11.4013	12.8795	10.0842	10.9146	6.5556	13.5017	15.1395	12.1711	13.437	16.3851	18.0006	8.9805	21.5185	22.0688	23.3737	16.7151	18.2274	16.6301	14.2483	12.414	13.8319	13.1508	14.113	21.054	22.1488	17.2735	13.1736	9.3475	11.7919	12.3302	12.6646	14.5518	17.364	14.3334	15.6677	16.9496	28.0897	9.2716	22.3465	18.5814
518	8.2267	11.1104	8.2977	7.4669	3.3126	12.7273	10.5932	14.3205	11.6621	11.5156	12.9802	10.0912	10.9348	6.546	13.5466	15.3051	12.2934	13.4922	16.5253	18.082	8.9535	21.5599	22.125	23.355	16.7766	18.291	16.653	14.2908	12.4399	13.9076	13.1021	14.1168	21.1491	22.2202	17.2999	13.2971	9.4299	11.9676	12.4492	12.7932	14.5904	17.4112	14.3865	15.6977	16.982	28.0479	9.2236	22.3791	18.6775
519	8.2626	11.0939	8.3201	7.4233	3.2848	12.6589	10.5764	14.3337	11.6163	11.581	13.0218	10.0708	10.8997	6.4974	13.5402	15.3635	12.3588	13.5217	16.6255	18.0946	8.9206	21.5959	22.1628	23.2866	16.7826	18.2684	16.6306	14.2531	12.3708	13.9453	12.9793	14.0802	21.1338	22.2315	17.2789	13.358	9.4717	12.0865	12.4992	12.8565	14.6429	17.4205	14.4244	15.6988	16.9707	27.968	9.1775	22.3615	18.746
520	8.3081	11.0878	8.3444	7.405	3.2645	12.612	10.5727	14.3893	11.5762	11.6648	13.0722	10.0709	10.8502	6.461	13.5363	15.4044	12.4028	13.5382	16.708	18.1147	8.8893	21.5965	22.193	23.272	16.8071	18.2308	16.6102	14.172	12.255	13.9939	12.9042	14.0873	21.1474	22.2463	17.2949	13.3956	9.5363	12.2082	12.5633	12.9183	14.7088	17.4286	14.4793	15.7208	16.9987	27.9969	9.0899	22.3677	18.7678
521	8.3863	11.1117	8.4054	7.4053	3.2496	12.5957	10.5732	14.4194	11.5897	11.7528	13.1549	10.0808	10.83	6.4461	13.5687	15.5228	12.4551	13.5635	16.7883	18.1872	8.8702	21.6561	22.2612	23.3171	16.889	18.2498	16.6499	14.1399	12.1795	14.0357	12.9006	14.1345	21.1971	22.3332	17.3309	13.4795	9.631	12.3565	12.6729	13.0292	14.7478	17.4497	14.5558	15.7666	17.058	28.1031	9.0408	22.4054	18.8464
522	8.4475	11.0951	8.4504	7.4092	3.2436	12.5931	10.573	14.4127	11.5836	11.8437	13.269	10.0803	10.7949	6.4339	13.5674	15.6182	12.5445	13.612	16.867	18.278	8.8719	21.7194	22.3807	23.3981	16.9934	18.2852	16.6868	14.1277	12.1904	14.0663	12.8927	14.1576	21.2365	22.4059	17.3445	13.5745	9.717	12.5156	12.7687	13.1399	14.8128	17.5278	14.6215	15.8191	17.125	28.1429	9.0269	22.4475	18.9519
523	8.4977	11.1126	8.5135	7.3842	3.2278	12.6005	10.5584	14.3413	11.5562	11.9483	13.3699	10.0978	10.7503	6.4133	13.5822	15.724	12.6639	13.6606	16.9709	18.3068	8.8399	21.7934	22.4767	23.4039	17.051	18.319	16.7342	14.1168	12.1851	14.0965	12.8858	14.1664	21.251	22.4564	17.3452	13.666	9.8181	12.6589	12.8449	13.23	14.8743	17.6058	14.6812	15.8536	17.1853	28.0869	9.0428	22.5044	19.0462
524	8.5583	11.1033	8.5502	7.3412	3.227	12.5917	10.5513	14.2685	11.5381	12.0499	13.4432	10.1133	10.7241	6.3859	13.6012	15.827	12.744	13.7126	17.0929	18.3067	8.8172	21.7919	22.5186	23.3719	17.0704	18.3185	16.8021	14.1073	12.1743	14.1567	12.8794	14.1785	21.2767	22.5381	17.3584	13.7424	9.9192	12.8174	12.9295	13.3304	14.9251	17.6382	14.7345	15.8955	17.2544	28.0731	9.0268	22.5451	19.129
525	8.6139	11.1081	8.5988	7.3504	3.2329	12.6199	10.5641	14.231	11.5466	12.1307	13.5089	10.1177	10.7333	6.376	13.6351	15.9103	12.801	13.7328	17.205	18.3647	8.8246	21.7996	22.5586	23.3734	17.0989	18.3578	16.8536	14.0906	12.1668	14.2248	12.8913	14.1957	21.316	22.5992	17.3825	13.8067	9.9749	12.9334	13.0043	13.3905	14.9435	17.6398	14.7901	15.9643	17.3228	28.1284	9.0409	22.5813	19.1781
526	8.672	11.1027	8.6311	7.3513	3.2354	12.6423	10.5948	14.1681	11.5593	12.2423	13.5894	10.135	10.7541	6.3766	13.6826	16.0025	12.8656	13.7635	17.2982	18.4433	8.8182	21.7814	22.6195	23.4272	17.126	18.3755	16.8829	14.0719	12.148	14.2649	12.9052	14.2212	21.3393	22.6831	17.4049	13.8649	10.0655	13.1048	13.0771	13.4776	14.9842	17.6351	14.8088	16.0169	17.3774	28.1774	9.0263	22.5892	19.2272
527	8.7272	11.1278	8.6905	7.348	3.2298	12.6487	10.6477	14.0836	11.5901	12.3378	13.6788	10.1412	10.7767	6.3775	13.7115	16.0924	12.9385	13.7716	17.3731	18.5279	8.8249	21.8228	22.6747	23.4617	17.136	18.398	16.9537	14.0759	12.1561	14.3273	12.9439	14.2465	21.3977	22.7768	17.4325	13.9191	10.1565	13.2512	13.1642	13.5901	15.0097	17.6788	14.8569	16.0448	17.4174	28.2209	9.011	22.5839	19.2411
528	8.813	11.1313	8.7733	7.3648	3.2427	12.674	10.7162	14.0422	11.6145	12.4599	13.7658	10.1833	10.7768	6.3735	13.7576	16.1919	13.0371	13.7997	17.4702	18.5924	8.8394	21.9046	22.7501	23.4791	17.1752	18.4367	17.0481	14.1015	12.1768	14.3805	12.9996	14.2613	21.4311	22.8662	17.4641	13.9947	10.2585	13.3802	13.262	13.7289	15.046	17.7038	14.9175	16.1162	17.4715	28.2467	9.0359	22.6156	19.3108
529	8.8731	11.1736	8.8227	7.3908	3.2566	12.7451	10.8138	14.0419	11.6626	12.5734	13.8762	10.2598	10.8189	6.3817	13.8624	16.3214	13.157	13.8744	17.5709	18.6182	8.8484	21.9569	22.8148	23.5051	17.2084	18.5487	17.1391	14.156	12.2033	14.4561	13.0761	14.3148	21.5123	23.0181	17.5144	14.101	10.3717	13.5404	13.404	13.8623	15.0799	17.7074	14.9527	16.1515	17.5086	28.2433	9.0216	22.6037	19.4138
530	8.9189	11.2165	8.8645	7.3924	3.2672	12.7671	10.872	14.0579	11.6692	12.6774	13.9946	10.2903	10.8764	6.3928	13.914	16.4302	13.249	13.9491	17.6683	18.6776	8.856	22.0678	22.8824	23.5463	17.2523	18.6042	17.1546	14.1986	12.2285	14.5171	13.0785	14.349	21.587	23.1148	17.522	14.1786	10.4596	13.7305	13.5318	13.977	15.1574	17.7398	15.0304	16.2011	17.5712	28.29	9.0325	22.6281	19.5441
531	8.9647	11.2652	8.8916	7.3797	3.2681	12.7678	10.9003	14.0796	11.6593	12.7727	14.0765	10.2908	10.9201	6.3812	13.9192	16.4778	13.3042	13.9619	17.7779	18.7132	8.8608	22.1133	22.9454	23.5509	17.2961	18.6345	17.177	14.2332	12.2319	14.602	13.0614	14.3526	21.6505	23.1446	17.4838	14.2183	10.5415	13.9041	13.6271	14.0857	15.1912	17.797	15.0971	16.2621	17.6617	28.3402	9.0486	22.7043	19.6466
532	9.0051	11.2765	8.9072	7.3585	3.2459	12.7673	10.9298	14.1235	11.7044	12.8568	14.1474	10.3029	10.9486	6.3937	13.9367	16.5631	13.3706	13.9978	17.8712	18.7702	8.8296	22.1056	22.9717	23.5104	17.332	18.722	17.2227	14.2648	12.294	14.6641	13.0884	14.375	21.7183	23.2045	17.4845	14.2783	10.6342	14.079	13.7356	14.2404	15.155	17.7918	15.1478	16.2953	17.7314	28.3777	9.0363	22.7259	19.6787
533	9.0655	11.2792	8.972	7.3816	3.2593	12.8047	11.003	14.2409	11.7687	12.988	14.2652	10.3747	10.9991	6.4286	13.9973	16.675	13.4629	14.0659	18.0049	18.8841	8.8638	22.17	23.0581	23.547	17.3818	18.848	17.2774	14.3353	12.394	14.7475	13.1873	14.4407	21.823	23.3383	17.5466	14.4035	10.7682	14.2964	13.8643	14.4484	15.2058	17.8152	15.1864	16.3738	17.7768	28.4664	9.045	22.7761	19.7199
534	9.1339	11.343	9.0605	7.4343	3.3048	12.8482	11.097	14.391	11.8132	13.1014	14.3659	10.4222	11.0336	6.4751	14.0728	16.7621	13.5643	14.13	18.0769	18.9388	8.8934	22.2611	23.1346	23.6219	17.4459	18.925	17.3461	14.3748	12.4327	14.8407	13.2805	14.507	21.9509	23.5118	17.6039	14.5272	10.8958	14.4939	13.983	14.6196	15.3089	17.8685	15.2674	16.4553	17.8722	28.5441	9.1142	22.8799	19.8327
535	9.2042	11.3998	9.1619	7.4618	3.3197	12.8406	11.1782	14.5244	11.8316	13.2288	14.4911	10.44	11.0842	6.4736	14.1588	16.8528	13.66	14.1687	18.1242	18.9519	8.9255	22.364	23.2576	23.6755	17.5297	18.9592	17.3949	14.384	12.4164	14.906	13.3236	14.5355	22.0448	23.6207	17.6418	14.583	10.9999	14.6844	14.0957	14.731	15.3969	17.9295	15.3386	16.512	17.9838	28.6731	9.178	22.9286	19.9237
536	9.2761	11.4385	9.2393	7.4899	3.3192	12.8028	11.216	14.6493	11.8461	13.3322	14.5895	10.4777	11.0895	6.4537	14.2371	16.9551	13.7602	14.1935	18.211	19.0031	8.9607	22.4655	23.3769	23.7512	17.5928	19.0311	17.4006	14.4294	12.3729	14.9543	13.3491	14.5635	22.1428	23.6558	17.6886	14.6322	11.0876	14.856	14.1774	14.845	15.4332	17.967	15.405	16.5546	18.0487	28.7284	9.2128	22.988	20.0221
537	9.3253	11.5188	9.2874	7.5167	3.3481	12.8138	11.2569	14.7344	11.8793	13.396	14.6743	10.5128	11.1235	6.4676	14.2922	17.0487	13.8454	14.2157	18.3178	19.0416	8.9726	22.5518	23.4708	23.7813	17.6258	19.1074	17.4388	14.5082	12.3893	15.0281	13.3729	14.5854	22.2221	23.7091	17.7368	14.6953	11.1924	14.9884	14.2464	14.9406	15.4705	17.9834	15.4664	16.6176	18.1078	28.7724	9.2551	23.0332	20.1254
538	9.3891	11.5906	9.3001	7.4872	3.3527	12.8035	11.3208	14.788	11.8836	13.497	14.7731	10.5397	11.1503	6.4891	14.3253	17.1349	13.9297	14.2363	18.3976	19.0601	8.9648	22.6037	23.5391	23.7829	17.6985	19.2054	17.444	14.5953	12.3967	15.1182	13.3789	14.5876	22.3123	23.7889	17.7756	14.7358	11.2873	15.1674	14.3418	15.0507	15.4721	17.985	15.4999	16.6857	18.162	28.8074	9.2891	23.0692	20.2029
539	9.4241	11.6567	9.3574	7.4779	3.3583	12.8054	11.3541	14.8202	11.9167	13.5888	14.8401	10.5729	11.1804	6.4843	14.3377	17.1841	13.9782	14.2554	18.4763	19.0812	8.9741	22.5889	23.6009	23.8028	17.7506	19.2712	17.4398	14.6222	12.3863	15.1753	13.3647	14.5772	22.3972	23.8912	17.8095	14.7519	11.3522	15.2785	14.3943	15.1419	15.4133	18	15.4939	16.7402	18.2529	28.843	9.2897	23.0958	20.2688
540	9.4299	11.6963	9.3755	7.492	3.3349	12.8795	11.3658	14.8763	11.9733	13.6692	14.9236	10.5784	11.1947	6.4534	14.4261	17.2667	14.0397	14.3007	18.5418	19.1056	8.9694	22.5793	23.6296	23.8012	17.7859	19.3644	17.5022	14.6504	12.3843	15.2127	13.3678	14.6022	22.5013	23.9516	17.8535	14.8427	11.4593	15.4183	14.4568	15.243	15.4349	18.0096	15.5014	16.7493	18.306	28.9022	9.299	23.0904	20.3748
541	9.4967	11.7193	9.4381	7.5218	3.3438	12.9654	11.3956	14.8984	12.0076	13.7452	15.0058	10.6172	11.2318	6.4714	14.5175	17.3689	14.1375	14.3658	18.6192	19.1299	8.9529	22.6293	23.7007	23.815	17.795	19.4635	17.5827	14.7091	12.4197	15.2642	13.3882	14.6314	22.6223	24.0299	17.9293	14.9163	11.5898	15.5621	14.5852	15.3623	15.4619	18.0289	15.5785	16.7978	18.3362	28.9177	9.3419	23.0556	20.4448
542	9.5457	11.7179	9.4815	7.5359	3.35	13.0236	11.4519	14.8824	12.0361	13.8547	15.111	10.676	11.2849	6.4802	14.5896	17.4694	14.2479	14.3993	18.6974	19.1668	8.9618	22.6649	23.7344	23.8256	17.8134	19.5688	17.6526	14.7606	12.4703	15.3071	13.4121	14.6684	22.7522	24.1071	17.9863	14.973	11.6845	15.698	14.6917	15.438	15.4893	18.0287	15.6016	16.8323	18.3648	28.9061	9.3346	23.0772	20.4502
543	9.6002	11.7695	9.5213	7.5675	3.3447	13.0892	11.5206	14.9028	12.0788	13.9786	15.2196	10.7302	11.3607	6.5199	14.6845	17.5425	14.3484	14.4042	18.7937	19.2383	8.9909	22.689	23.8043	23.8983	17.8661	19.6497	17.7501	14.7968	12.5407	15.3812	13.4502	14.7322	22.8842	24.2518	18.0401	15.0599	11.7835	15.8768	14.8135	15.5083	15.516	18.0465	15.6591	16.899	18.4011	28.957	9.3265	23.1328	20.4801
544	9.6283	11.8451	9.5539	7.604	3.3341	13.1654	11.5873	14.9075	12.116	14.0622	15.3191	10.8025	11.3938	6.5471	14.8105	17.6298	14.4061	14.4491	18.8956	19.3233	9.006	22.772	23.8908	23.9809	17.9032	19.7515	17.8396	14.8351	12.5983	15.4265	13.4774	14.8111	23.0097	24.4247	18.1038	15.1465	11.9045	16.0859	14.942	15.6078	15.5354	18.0803	15.6592	16.9713	18.4435	29.0573	9.3569	23.1795	20.5818
545	9.672	11.9383	9.6508	7.6435	3.3838	13.2495	11.6946	14.9262	12.2184	14.1793	15.4469	10.8976	11.4687	6.61	14.9295	17.7608	14.4948	14.5288	19.0063	19.4083	9.0581	22.9034	23.9987	24.0934	18.0034	19.875	17.9475	14.8932	12.6677	15.5007	13.5163	14.9065	23.1469	24.6066	18.2021	15.2517	12.0483	16.3037	15.0899	15.7736	15.5288	18.1274	15.7267	17.0331	18.502	29.175	9.4054	23.2364	20.6847
546	9.763	12.0265	9.7581	7.6836	3.4398	13.2857	11.786	14.9213	12.2768	14.3213	15.5505	10.9689	11.5734	6.6821	15.017	17.882	14.5768	14.5835	19.115	19.492	9.1187	23.0382	24.155	24.1859	18.111	19.9874	18.0423	14.9405	12.7372	15.597	13.5417	14.9861	23.2551	24.7499	18.2975	15.3546	12.1632	16.5226	15.2128	15.974	15.6324	18.1904	15.8334	17.0842	18.5745	29.271	9.4513	23.297	20.7488
547	9.8049	12.0763	9.7756	7.7029	3.4279	13.3111	11.8435	14.9006	12.3037	14.4007	15.5887	11.0378	11.6082	6.6815	15.0802	17.9605	14.621	14.5993	19.2112	19.4994	9.1555	23.1176	24.1816	24.1948	18.1353	20.044	18.0898	14.977	12.7717	15.6491	13.5163	15.024	23.3066	24.8096	18.3067	15.4019	12.2419	16.6884	15.2974	16.0882	15.6591	18.218	15.8489	17.0995	18.6501	29.3636	9.4664	23.3254	20.7755
548	9.8512	12.0982	9.7814	7.7419	3.4086	13.3432	11.884	14.9312	12.323	14.4546	15.6583	11.0674	11.623	6.6928	15.1206	18.0265	14.685	14.6445	19.2916	19.5317	9.1748	23.1751	24.2243	24.2029	18.148	20.0801	18.1522	14.979	12.7918	15.7039	13.5181	15.0421	23.3981	24.9511	18.3508	15.4515	12.3124	16.8342	15.3854	16.2186	15.662	18.2348	15.8994	17.1621	18.7147	29.4779	9.4767	23.3581	20.8162
549	9.8574	12.1351	9.8064	7.7497	3.4058	13.3515	11.9164	14.9905	12.3371	14.4823	15.7172	11.1043	11.6554	6.6822	15.1558	18.0302	14.7237	14.6511	19.348	19.5254	9.1942	23.2325	24.2902	24.2068	18.1969	20.1268	18.1805	14.9577	12.8049	15.7169	13.5625	15.0785	23.4368	25.0504	18.3891	15.4817	12.3923	16.935	15.4439	16.3256	15.6147	18.2357	15.9464	17.2209	18.7551	29.5227	9.4866	23.4116	20.8454
550	9.8951	12.2026	9.8675	7.7709	3.4302	13.366	12.0257	15.1265	12.3897	14.5436	15.7892	11.1741	11.6867	6.6714	15.2179	18.1	14.7925	14.6712	19.4075	19.5525	9.179	23.269	24.3348	24.2495	18.2599	20.2296	18.2535	15.0079	12.8249	15.7666	13.6302	15.1397	23.5493	25.2801	18.4366	15.533	12.479	17.0975	15.5309	16.5227	15.6025	18.2119	15.9739	17.2873	18.8607	29.5909	9.4894	23.4689	20.9319
551	9.9353	12.2589	9.9415	7.794	3.4526	13.383	12.1114	15.2688	12.3987	14.619	15.8803	11.239	11.7059	6.67	15.2603	18.1563	14.8373	14.6831	19.4746	19.6075	9.1736	23.2931	24.4054	24.3347	18.2963	20.2823	18.3196	15.0338	12.8089	15.8039	13.6609	15.1892	23.6464	25.4381	18.479	15.5596	12.5238	17.2465	15.6223	16.6132	15.6013	18.1771	15.9811	17.3632	18.9195	29.6667	9.5073	23.4977	21.0426
552	9.9967	12.2967	9.9821	7.8349	3.4415	13.4049	12.1915	15.4173	12.4149	14.7267	15.9515	11.2654	11.7562	6.6963	15.3553	18.2558	14.9364	14.7123	19.5905	19.6636	9.2126	23.3626	24.5115	24.423	18.3555	20.3487	18.3546	15.0768	12.7977	15.8727	13.7047	15.2219	23.7669	25.5882	18.5536	15.6277	12.6198	17.416	15.7215	16.7489	15.6331	18.1925	15.9895	17.4269	18.9572	29.7393	9.5471	23.5315	21.1597
553	10.0173	12.335	9.9874	7.8309	3.4243	13.461	12.2468	15.5833	12.4831	14.7974	16.0039	11.2911	11.8041	6.7018	15.4003	18.3176	15.0023	14.7325	19.6882	19.7037	9.2266	23.3852	24.554	24.4431	18.3798	20.4301	18.3749	15.0807	12.8565	15.9245	13.747	15.249	23.859	25.696	18.6117	15.707	12.7118	17.5878	15.776	16.9004	15.6156	18.1865	15.9738	17.4558	18.9831	29.7446	9.5763	23.5033	21.1746
554	10.0371	12.331	10.0251	7.8216	3.4213	13.5165	12.2941	15.6936	12.5305	14.8503	16.0739	11.3167	11.8288	6.7095	15.4323	18.3419	15.0464	14.7559	19.7482	19.7393	9.2256	23.4058	24.5467	24.4437	18.3782	20.4649	18.3947	15.089	12.9155	15.9587	13.8082	15.2682	23.9515	25.7752	18.6748	15.7454	12.7914	17.7562	15.8141	16.9932	15.6063	18.2099	15.9834	17.4692	18.9848	29.7603	9.5967	23.436	21.1431
555	10.063	12.36	10.0726	7.8332	3.4392	13.6043	12.3137	15.7851	12.5813	14.9317	16.1646	11.3639	11.8433	6.7261	15.4963	18.3778	15.071	14.7941	19.7988	19.7276	9.2399	23.4423	24.6061	24.4862	18.4027	20.5155	18.4482	15.1097	12.9018	15.9942	13.8443	15.2619	24.0515	25.8691	18.7179	15.7582	12.8789	17.9023	15.8859	17.045	15.6379	18.2262	15.9909	17.5115	19.0085	29.9585	9.6341	23.4897	21.1751
556	10.1225	12.4502	10.1167	7.864	3.4475	13.6608	12.3201	15.87	12.6079	15.0053	16.2528	11.3968	11.8688	6.7447	15.575	18.4246	15.1224	14.7991	19.8409	19.7332	9.2512	23.5147	24.7222	24.5351	18.4712	20.5823	18.4786	15.1709	12.8915	16.04	13.9002	15.2667	24.1922	25.9751	18.7709	15.7701	12.9677	18.0639	15.9442	17.1005	15.624	18.2143	15.97	17.601	19.1057	30.1725	9.6462	23.5437	21.2897
557	10.1309	12.4701	10.1159	7.8812	3.4384	13.6954	12.3539	15.9751	12.6324	15.0595	16.3148	11.4573	11.9267	6.751	15.6454	18.482	15.1649	14.8116	19.8887	19.7764	9.27	23.5615	24.816	24.5963	18.4791	20.6128	18.5308	15.2457	12.897	16.0854	13.9335	15.272	24.2976	26.0671	18.8079	15.8303	13.0635	18.2265	16.0086	17.1506	15.6371	18.2503	15.9725	17.656	19.1637	30.2843	9.6405	23.5407	21.3395
558	10.1684	12.4895	10.1231	7.8972	3.4313	13.7332	12.4165	16.0649	12.6485	15.1252	16.3913	11.5221	11.9937	6.7838	15.7357	18.5317	15.2081	14.8207	19.9504	19.8116	9.2633	23.5816	24.8903	24.6491	18.4986	20.6888	18.5807	15.323	12.9445	16.1336	13.9769	15.2647	24.4484	26.151	18.8481	15.8751	13.1702	18.3871	16.0962	17.1982	15.6489	18.2761	16.014	17.6959	19.2264	30.3429	9.6693	23.5581	21.3836
559	10.17	12.5367	10.1491	7.9228	3.4392	13.7936	12.4855	16.1013	12.7025	15.2101	16.4496	11.5689	12.0549	6.7977	15.8154	18.5808	15.2531	14.8573	20.0377	19.8661	9.2743	23.5467	24.881	24.6432	18.55	20.7855	18.6349	15.3952	13.0192	16.1797	14.0976	15.3013	24.5991	26.2352	18.8914	15.8914	13.2454	18.5963	16.1649	17.2795	15.6544	18.2729	16.0725	17.7149	19.2663	30.3592	9.6624	23.5742	21.3905
560	10.1867	12.5842	10.1786	7.9347	3.4423	13.8494	12.5432	16.1348	12.7685	15.3186	16.5094	11.6083	12.1003	6.8076	15.8977	18.6468	15.3201	14.906	20.1493	19.9177	9.3017	23.5345	24.9404	24.6486	18.5971	20.9032	18.713	15.4915	13.0597	16.2236	14.2263	15.3879	24.7592	26.3558	18.9608	15.9285	13.329	18.813	16.2506	17.3683	15.6628	18.2749	16.0884	17.7644	19.3012	30.3814	9.6662	23.5144	21.4022
561	10.2344	12.6421	10.2297	7.9702	3.4705	13.8903	12.548	16.1287	12.7738	15.3899	16.5497	11.6423	12.1255	6.828	15.9532	18.7029	15.3502	14.9411	20.1813	19.9103	9.3417	23.564	25.0229	24.7158	18.6764	20.9682	18.7546	15.5439	13.0887	16.3004	14.2806	15.4011	24.8758	26.4413	19.0371	15.9901	13.4001	18.9495	16.3278	17.4155	15.6753	18.2563	16.1115	17.8436	19.3474	30.4306	9.712	23.5515	21.4535
562	10.2748	12.7024	10.2888	7.9923	3.4753	13.9162	12.5609	16.0878	12.8271	15.4562	16.5993	11.7267	12.1472	6.8507	15.9889	18.7742	15.3843	14.9425	20.2141	19.924	9.3728	23.664	25.1445	24.795	18.739	21.0324	18.7815	15.5985	13.0844	16.3394	14.2887	15.4296	24.9716	26.4901	19.065	16.0279	13.4587	19.0709	16.3936	17.4327	15.6747	18.2443	16.1291	17.9584	19.4575	30.4816	9.7924	23.6472	21.5112
563	10.324	12.7564	10.3182	8.0268	3.4839	13.9112	12.601	16.0597	12.8911	15.5219	16.6728	11.7966	12.2245	6.8681	16.0535	18.8213	15.4558	14.9444	20.2584	19.9366	9.397	23.7712	25.2184	24.8366	18.8299	21.1289	18.8306	15.6754	13.1439	16.382	14.2954	15.4277	25.1102	26.5775	19.0795	16.0709	13.5371	19.1855	16.4988	17.5234	15.6883	18.2549	16.1705	18.0258	19.5398	30.5762	9.8328	23.7566	21.5798
564	10.3872	12.8368	10.3396	8.0432	3.4855	13.9133	12.6611	16.0281	12.932	15.6013	16.7459	11.878	12.2877	6.883	16.1565	18.8602	15.5338	14.9584	20.3194	19.9509	9.4093	23.8611	25.2727	24.8965	18.9129	21.2174	18.9085	15.7507	13.1727	16.4432	14.3357	15.457	25.2516	26.6619	19.1524	16.1091	13.6298	19.3383	16.5839	17.6532	15.7244	18.2498	16.2104	18.0427	19.6161	30.6789	9.8397	23.8088	21.7107
565	10.4308	12.9339	10.3718	8.082	3.5007	13.9171	12.6736	15.9806	12.9595	15.6647	16.8406	11.9638	12.3535	6.8829	16.2984	18.9495	15.6088	14.9773	20.3839	20.0086	9.4397	23.9449	25.3293	24.9461	19.0293	21.2845	18.9793	15.8597	13.2117	16.5033	14.3626	15.4894	25.3744	26.8091	19.2428	16.1446	13.6805	19.5203	16.6473	17.809	15.7365	18.2504	16.2581	18.1012	19.6747	30.7836	9.8846	23.8657	21.8527
566	10.4618	12.991	10.4111	8.1239	3.5192	13.9496	12.7102	15.9549	13.0123	15.7567	16.9597	12.0321	12.3973	6.9053	16.3731	19.0493	15.6782	15.0153	20.4638	20.0672	9.4555	23.9811	25.3839	25.0023	19.0925	21.3887	19.0555	15.9477	13.2915	16.5571	14.3918	15.528	25.5109	26.9533	19.3099	16.1969	13.7605	19.6869	16.7507	17.9768	15.7822	18.2977	16.33	18.1786	19.7221	30.9032	9.9163	23.926	21.928
567	10.4945	13.0628	10.4439	8.155	3.5378	13.9979	12.7631	15.9741	13.0462	15.8206	17.0163	12.055	12.398	6.9332	16.4106	19.0768	15.7219	15.0501	20.5095	20.0837	9.4869	24.0486	25.4567	25.1056	19.1497	21.4854	19.0935	15.984	13.3665	16.5748	14.4258	15.5851	25.617	27.1146	19.3629	16.2436	13.829	19.7974	16.8336	18.1379	15.8144	18.3261	16.3973	18.2634	19.7861	31.0052	9.9698	23.9608	22.0127
568	10.5342	13.1299	10.5073	8.177	3.5513	14.0759	12.8529	16.0289	13.0893	15.868	17.0786	12.0932	12.42	6.9752	16.4255	19.1137	15.7483	15.0922	20.5677	20.1077	9.5169	24.1162	25.5125	25.1925	19.2085	21.5846	19.1413	16.0367	13.421	16.5975	14.4464	15.6232	25.7148	27.2319	19.3859	16.2962	13.9147	19.9201	16.9096	18.3262	15.8371	18.3695	16.4575	18.3234	19.8336	31.0476	10.0017	23.9929	22.0501
569	10.6232	13.2181	10.5706	8.2155	3.5753	14.1539	12.9518	16.1041	13.131	15.9372	17.1782	12.1973	12.488	7.0312	16.4943	19.2024	15.807	15.1339	20.6488	20.1773	9.579	24.1953	25.6141	25.3036	19.2749	21.7295	19.2407	16.1269	13.5021	16.6501	14.4734	15.6984	25.8456	27.3832	19.4678	16.3948	14.0284	20.0836	17.0175	18.5048	15.8817	18.3813	16.5166	18.361	19.8672	31.0782	10.037	24.0745	22.1012
570	10.6839	13.2929	10.6215	8.2432	3.5989	14.2349	13.0172	16.2186	13.1962	16.0465	17.2622	12.2753	12.532	7.0705	16.5681	19.2888	15.8674	15.1765	20.7405	20.2611	9.6203	24.2391	25.7273	25.3687	19.3493	21.8739	19.3497	16.1947	13.5666	16.6791	14.4973	15.7825	25.9911	27.572	19.5397	16.4535	14.1315	20.2679	17.1025	18.647	15.9009	18.3917	16.5569	18.3859	19.9289	31.0795	10.0717	24.1542	22.1097
571	10.7596	13.3763	10.6594	8.2858	3.6355	14.319	13.0628	16.3471	13.253	16.119	17.3471	12.2883	12.5983	7.0887	16.6163	19.3449	15.9251	15.2161	20.8066	20.2944	9.6571	24.2704	25.8321	25.4315	19.4044	21.9758	19.4384	16.2253	13.5851	16.7249	14.5244	15.8475	26.0999	27.7298	19.5994	16.4933	14.2166	20.4117	17.1734	18.721	15.8693	18.3843	16.5504	18.4124	20.0107	31.0924	10.115	24.181	22.1645
572	10.7835	13.3801	10.698	8.2936	3.6521	14.3494	13.0967	16.4276	13.2687	16.1427	17.4213	12.3255	12.6336	7.0577	16.6192	19.3811	15.9659	15.2109	20.8599	20.2767	9.6692	24.2846	25.9092	25.4365	19.4456	22.0404	19.4823	16.2673	13.5425	16.7581	14.5532	15.8713	26.1667	27.8549	19.6278	16.5371	14.2534	20.516	17.2281	18.7509	15.8666	18.3757	16.5796	18.447	20.0899	31.1383	10.1292	24.2149	22.2238
573	10.776	13.3215	10.705	8.2791	3.6457	14.3447	13.1452	16.5125	13.2769	16.141	17.4974	12.3396	12.66	7.0638	16.6244	19.4054	16.0011	15.1884	20.8899	20.2575	9.6588	24.27	25.9394	25.4249	19.4674	22.0663	19.4891	16.2721	13.5103	16.7529	14.5491	15.8716	26.1999	27.9131	19.6164	16.5301	14.3037	20.6714	17.2419	18.7398	15.91	18.4062	16.6372	18.4743	20.1461	31.2358	10.1101	24.1965	22.2663
574	10.7696	13.3155	10.7004	8.2648	3.6599	14.3625	13.1656	16.5717	13.2857	16.174	17.5095	12.3539	12.6428	7.0387	16.6284	19.4023	16.0085	15.211	20.8987	20.2458	9.6662	24.28	25.9427	25.3949	19.4928	22.1244	19.5007	16.2345	13.4854	16.7468	14.5322	15.8759	26.2436	27.9713	19.6484	16.5292	14.3507	20.7462	17.2532	18.7493	15.9216	18.37	16.6053	18.5095	20.1737	31.2935	10.1255	24.2074	22.2996
575	10.7742	13.3981	10.7364	8.2987	3.6512	14.4109	13.2152	16.6583	13.3388	16.2477	17.5424	12.3954	12.6651	7.0525	16.6972	19.4778	16.0468	15.2338	20.9474	20.3014	9.6951	24.3114	25.9565	25.3933	19.5588	22.2127	19.5606	16.2717	13.4753	16.8149	14.5473	15.9322	26.4047	28.1113	19.7383	16.5439	14.4686	20.9275	17.2813	18.7867	15.9059	18.353	16.5864	18.5381	20.2434	31.2685	10.1299	24.1821	22.3194
576	10.8151	13.4654	10.7936	8.3641	3.6885	14.4576	13.2914	16.7851	13.3732	16.339	17.6111	12.4755	12.7554	7.0849	16.787	19.5492	16.1401	15.2672	21.0256	20.3746	9.7351	24.3453	25.9956	25.3482	19.6471	22.3316	19.644	16.3473	13.5414	16.9043	14.5701	16.0198	26.6186	28.3244	19.8467	16.5897	14.5792	21.1423	17.343	18.8711	15.9049	18.3327	16.608	18.5522	20.2852	31.1747	10.1785	24.1472	22.3575
577	10.8447	13.5245	10.859	8.3917	3.7416	14.4227	13.3211	16.8848	13.3911	16.3754	17.6443	12.5108	12.8166	7.1265	16.8456	19.6146	16.1933	15.2762	21.0611	20.4266	9.7646	24.3649	26.0756	25.3382	19.6955	22.4006	19.6544	16.3677	13.5777	16.9328	14.5966	16.0645	26.7202	28.4656	19.86	16.5675	14.6597	21.2993	17.4164	18.9081	15.9328	18.3438	16.6359	18.629	20.368	31.1756	10.25	24.2293	22.4915
578	10.9226	13.6171	10.923	8.4299	3.7888	14.3812	13.333	16.8638	13.4019	16.4249	17.6533	12.5347	12.8392	7.133	16.8835	19.6776	16.1917	15.2757	21.0575	20.3972	9.8015	24.366	26.1881	25.4091	19.7543	22.4668	19.6623	16.3925	13.6091	16.9338	14.63	16.073	26.7886	28.5374	19.8866	16.5524	14.6838	21.4032	17.4708	18.9108	15.9464	18.3881	16.657	18.7025	20.4207	31.2065	10.2939	24.3136	22.5985
579	11.007	13.7197	10.9892	8.4877	3.8218	14.4039	13.3667	16.8633	13.4244	16.5078	17.7038	12.5685	12.9043	7.1553	16.9192	19.7212	16.2473	15.3149	21.1029	20.3992	9.8598	24.3885	26.2955	25.5275	19.8051	22.5396	19.6782	16.4407	13.6384	16.9998	14.702	16.0686	26.8928	28.6914	19.9589	16.5781	14.7444	21.5365	17.5534	18.9546	15.9328	18.4187	16.6786	18.7725	20.4647	31.291	10.3072	24.3872	22.6357
580	10.9975	13.7957	11.0018	8.5085	3.8249	14.3743	13.3684	16.8502	13.4389	16.5514	17.7849	12.5602	12.9211	7.1641	16.9374	19.7624	16.2908	15.3432	21.1768	20.4766	9.8632	24.447	26.3732	25.5533	19.8486	22.6355	19.6821	16.5175	13.6598	17.0394	14.7189	16.0655	27.0171	28.8736	19.9609	16.6273	14.7793	21.6542	17.6073	19.0317	15.9503	18.4268	16.6974	18.7832	20.5117	31.3957	10.3123	24.4164	22.6594
581	11.0252	13.8271	11.0185	8.5032	3.8232	14.3534	13.3813	16.8059	13.4579	16.6006	17.8784	12.5611	12.9838	7.1935	17.0058	19.8127	16.3266	15.3854	21.2944	20.5731	9.8354	24.4683	26.4214	25.5924	19.9137	22.7365	19.7278	16.5941	13.7084	17.0444	14.76	16.0946	27.1664	29.0733	19.9856	16.7029	14.8265	21.7525	17.6809	19.1354	15.9601	18.4223	16.702	18.7955	20.5876	31.4673	10.3163	24.4394	22.6629
582	11.0874	13.8616	11.0521	8.5249	3.8587	14.364	13.4159	16.7781	13.5183	16.6685	17.9529	12.6226	13.0314	7.2191	17.0571	19.8378	16.3687	15.3987	21.3398	20.6425	9.8383	24.5106	26.4825	25.6563	19.9744	22.8096	19.8071	16.6059	13.7487	17.0676	14.8181	16.1401	27.3069	29.1748	20.0323	16.7377	14.8963	21.8075	17.7485	19.2571	15.9256	18.3981	16.7072	18.8585	20.6178	31.4699	10.3508	24.42	22.6555
583	11.1389	13.8731	11.0919	8.5623	3.8942	14.4024	13.4352	16.748	13.5842	16.7288	18.0085	12.6978	13.0752	7.2165	17.1161	19.8984	16.4124	15.4412	21.3471	20.6934	9.8795	24.5232	26.5108	25.7035	20.0701	22.8902	19.8543	16.631	13.8188	17.1107	14.8606	16.1816	27.4528	29.2364	20.1101	16.7429	14.9498	21.8936	17.8036	19.3962	15.9304	18.3777	16.7364	18.9183	20.638	31.5028	10.3923	24.4284	22.6611
584	11.1603	13.9028	11.122	8.5932	3.9353	14.4374	13.4277	16.6992	13.6325	16.8042	18.0909	12.747	13.1101	7.2474	17.1703	19.9525	16.4677	15.4603	21.4086	20.6976	9.89	24.4896	26.5373	25.5901	20.1204	22.9715	19.8904	16.6993	13.9295	17.192	14.9309	16.1804	27.574	29.2798	20.1851	16.7659	15.0374	22.0055	17.8478	19.5412	15.9555	18.3676	16.7949	18.9803	20.646	31.5425	10.4368	24.4507	22.6918
585	11.2106	13.9749	11.1643	8.5927	3.99	14.5212	13.4792	16.6474	13.67	16.8998	18.2146	12.829	13.1664	7.3027	17.245	20.0127	16.4911	15.4888	21.482	20.6967	9.9185	24.5136	26.6063	25.5522	20.1674	23.0845	19.9543	16.7295	14.034	17.2507	15.0218	16.2191	27.6556	29.3291	20.2345	16.807	15.1371	22.1049	17.9183	19.6803	15.9903	18.3463	16.7923	19.0678	20.7336	31.5061	10.4969	24.498	22.8051
586	11.2544	14.0303	11.2101	8.6207	3.9913	14.583	13.496	16.644	13.6918	16.9497	18.2811	12.8757	13.2088	7.3451	17.2589	20.0335	16.5219	15.4978	21.5686	20.7248	9.9448	24.5653	26.6367	25.5379	20.2577	23.133	19.9822	16.7472	14.1191	17.2484	15.0761	16.2519	27.7356	29.3444	20.2824	16.8565	15.2156	22.1678	17.9532	19.766	15.9735	18.336	16.8118	19.092	20.76	31.4564	10.5454	24.5047	22.856
587	11.2696	14.0467	11.2215	8.6207	3.9694	14.6799	13.5263	16.6222	13.6884	16.9766	18.2853	12.9458	13.2461	7.3424	17.2796	20.0389	16.5173	15.5164	21.5737	20.7321	9.9675	24.5817	26.6188	25.5364	20.3002	23.2011	20.0393	16.7267	14.1716	17.2837	15.1031	16.2725	27.7914	29.3717	20.3358	16.9076	15.2789	22.2602	18.0142	19.8605	15.9396	18.3561	16.8129	19.0408	20.7734	31.3781	10.5027	24.5161	22.8572
588	11.2334	14.0768	11.2044	8.6337	3.962	14.7196	13.552	16.6127	13.6985	17.0044	18.3387	12.989	13.2611	7.3456	17.2659	20.0679	16.559	15.5044	21.5803	20.7253	9.948	24.5495	26.5721	25.5478	20.333	23.2358	20.0465	16.7115	14.1924	17.2996	15.091	16.2741	27.8115	29.3723	20.3432	16.932	15.3141	22.308	18.0424	19.9194	15.9037	18.3336	16.8322	18.9833	20.8	31.3042	10.4492	24.5518	22.8444
589	11.277	14.1432	11.252	8.6546	4.0006	14.7632	13.5484	16.6593	13.701	17.0556	18.3654	13.0327	13.2232	7.3489	17.2972	20.0822	16.6135	15.4766	21.6134	20.6934	9.9648	24.5248	26.6103	25.5805	20.3566	23.2896	20.0409	16.7651	14.1936	17.3019	15.0992	16.2515	27.8529	29.3699	20.3736	16.9419	15.393	22.367	18.0797	19.9632	15.9132	18.3923	16.9169	19.0324	20.8359	31.1808	10.4735	24.5889	22.8602
590	11.3339	14.2171	11.3073	8.6929	4.0636	14.7819	13.5706	16.7517	13.6797	17.1038	18.4155	13.1159	13.2309	7.3401	17.3573	20.1613	16.6885	15.4669	21.6853	20.7534	9.999	24.5407	26.6975	25.6317	20.3687	23.3306	20.0861	16.8078	14.1838	17.3411	15.1606	16.2576	27.9854	29.4608	20.4071	16.9573	15.4575	22.4586	18.1301	20.0081	15.9303	18.4398	16.9339	19.0634	20.8916	31.1955	10.5054	24.6093	22.8712
591	11.3239	14.3061	11.3474	8.6973	4.0894	14.7892	13.6338	16.8522	13.7198	17.1273	18.4697	13.1879	13.2738	7.3485	17.377	20.1976	16.6997	15.4788	21.7337	20.7604	10.0178	24.5261	26.7269	25.6254	20.3451	23.3608	20.0724	16.8501	14.1675	17.361	15.2181	16.2596	28.0707	29.5188	20.5091	16.9429	15.4804	22.5449	18.1546	20.0729	15.8987	18.4201	16.9233	19.0559	20.9357	31.2192	10.5011	24.5768	22.8431
592	11.3191	14.3513	11.3538	8.6861	4.0634	14.7349	13.6767	16.8899	13.7273	17.1366	18.4453	13.2	13.2747	7.3492	17.3619	20.2149	16.6872	15.492	21.7282	20.7198	10.0067	24.5585	26.7478	25.6625	20.3348	23.4014	20.0858	16.8665	14.1259	17.3583	15.2342	16.2213	28.1433	29.5765	20.6248	16.8953	15.5015	22.6698	18.166	20.0712	15.8355	18.3313	16.9212	19.1274	20.9851	31.3422	10.4987	24.5727	22.8042
593	11.4103	14.3977	11.4228	8.7299	4.0576	14.758	13.7247	16.956	13.7463	17.2137	18.5005	13.2213	13.2471	7.3665	17.3524	20.2562	16.7438	15.5576	21.7556	20.7395	10.0195	24.6085	26.7836	25.7391	20.4164	23.4316	20.1229	16.9047	14.1286	17.4224	15.2251	16.2413	28.2182	29.6892	20.719	16.9055	15.5546	22.8663	18.2047	20.0693	15.8879	18.3287	16.9457	19.2192	20.9971	31.5153	10.5304	24.5635	22.8936
594	11.4674	14.3854	11.4908	8.7746	4.1026	14.7779	13.7512	17.0867	13.8232	17.2676	18.5689	13.3129	13.3258	7.3982	17.3959	20.3412	16.859	15.5817	21.8608	20.8023	10.0579	24.6573	26.9045	25.8777	20.4962	23.5495	20.2187	16.9492	14.1803	17.451	15.2331	16.3001	28.3165	29.8634	20.8005	16.9263	15.6525	23.0471	18.2783	20.158	15.933	18.4084	17.0219	19.2689	20.9801	31.6249	10.5302	24.6192	23.0145
595	11.4887	14.3724	11.4941	8.7861	4.1307	14.7707	13.7529	17.1974	13.8587	17.3616	18.6104	13.3646	13.4296	7.4396	17.4351	20.4205	16.921	15.6085	21.9355	20.904	10.0663	24.6639	26.9883	25.9099	20.4959	23.6947	20.2839	16.9922	14.2416	17.4701	15.2663	16.3503	28.4373	29.9948	20.8906	16.9521	15.7156	23.1844	18.3331	20.2429	15.8977	18.3916	17.0245	19.2538	20.9838	31.6538	10.5448	24.6053	23.0499
596	11.5405	14.3292	11.5519	8.8162	4.1273	14.7889	13.7762	17.2759	13.8838	17.4197	18.6594	13.3558	13.4467	7.4831	17.4574	20.4291	16.9294	15.609	21.9754	20.9555	10.0652	24.6204	27.0582	25.8416	20.5033	23.735	20.3019	17.0047	14.2666	17.466	15.2543	16.37	28.5086	30.0713	20.9506	16.9789	15.7286	23.272	18.3497	20.2488	15.8646	18.2837	16.9822	19.2517	20.9611	31.6581	10.572	24.5947	23.0384
597	11.5816	14.3462	11.6523	8.8746	4.1614	14.8079	13.8533	17.3945	13.9262	17.4962	18.7228	13.368	13.4848	7.5196	17.5099	20.4794	16.9635	15.6401	22.0428	21.0013	10.1113	24.5745	27.0536	25.8263	20.5038	23.7372	20.3075	17.0373	14.3152	17.4863	15.2851	16.372	28.5705	30.1762	20.9611	16.9806	15.7804	23.3873	18.3853	20.2613	15.7893	18.2077	16.925	19.221	20.9792	31.6127	10.6113	24.5904	22.9991
598	11.5294	14.3195	11.6851	8.8476	4.137	14.8355	13.9336	17.4329	13.9629	17.5894	18.7707	13.3949	13.4854	7.5305	17.5752	20.5264	17.0063	15.6485	22.1184	21.0524	10.0925	24.5068	27.0257	25.7778	20.5203	23.841	20.3305	17.0454	14.321	17.5155	15.3151	16.4165	28.6363	30.4018	21.0032	17.0093	15.8432	23.4907	18.5013	20.3155	15.795	18.1985	16.9149	19.1833	20.9514	31.4994	10.5858	24.55	22.9215
599	11.4898	14.3473	11.6719	8.8259	4.1563	14.8327	13.945	17.4469	13.9661	17.61	18.7855	13.4229	13.4683	7.5252	17.5862	20.5732	17.0068	15.6583	22.1713	21.0371	10.0508	24.5116	26.9936	25.7385	20.4857	23.8636	20.3376	17.0376	14.326	17.5208	15.3422	16.4435	28.7358	30.4883	21.0223	17.0234	15.8755	23.5726	18.5662	20.3695	15.8174	18.2625	16.9786	19.168	20.9626	31.4467	10.5992	24.5035	22.941
600	11.5541	14.4509	11.7196	8.8704	4.2059	14.8535	13.9787	17.456	13.9877	17.6689	18.8741	13.4951	13.4467	7.5403	17.668	20.6187	16.9961	15.6868	22.2545	21.0894	10.07	24.5944	27.0593	25.7356	20.5145	23.9075	20.3346	17.0314	14.3363	17.5694	15.3456	16.494	28.7836	30.6256	21.0932	17.0798	15.9256	23.7073	18.6091	20.4313	15.8779	18.3085	17.0011	19.2216	21.0234	31.4538	10.6123	24.579	23.0103
601	11.6625	14.5042	11.7653	8.9329	4.2686	14.869	13.9608	17.4609	13.9945	17.6911	18.929	13.5782	13.4756	7.5607	17.7358	20.6587	17.0023	15.68	22.3038	21.0889	10.144	24.6566	27.176	25.7698	20.5786	23.9305	20.3621	16.9618	14.292	17.5539	15.3558	16.4752	28.8249	30.817	21.1216	17.1215	15.9733	23.8061	18.6333	20.4416	15.9136	18.3711	17.017	19.3018	21.112	31.5412	10.6753	24.6163	23.0586
602	11.6688	14.4869	11.7414	8.9131	4.2598	14.869	13.9238	17.3655	13.9746	17.7246	18.9461	13.6521	13.4602	7.5634	17.8182	20.6624	16.9931	15.6345	22.3091	21.0941	10.1221	24.6784	27.1593	25.7793	20.5977	23.952	20.3592	16.9412	14.2698	17.5437	15.3109	16.4906	28.9171	30.9073	21.1018	17.1125	15.9414	23.8625	18.6003	20.467	15.9199	18.3958	17.0504	19.3331	21.1093	31.5361	10.6691	24.6247	23.0491
603	11.6803	14.5404	11.7523	8.9007	4.2414	14.8876	13.9021	17.2905	13.9461	17.7386	18.9397	13.7039	13.4452	7.5099	17.8901	20.6747	16.9904	15.6051	22.3089	21.0516	10.0983	24.7344	27.0949	25.8277	20.5893	24.0037	20.3232	16.9897	14.2224	17.531	15.2379	16.4732	28.9657	30.9943	21.0854	17.1222	15.969	23.8844	18.5646	20.5171	15.8871	18.3569	17.0172	19.3402	21.0778	31.4719	10.634	24.6313	23.0483
604	11.6331	14.4521	11.721	8.8873	4.1952	14.9401	13.8229	17.234	13.9144	17.7409	18.9098	13.7355	13.4044	7.5131	17.9109	20.6861	16.9776	15.5747	22.2939	20.9859	10.0453	24.6153	26.9911	25.7535	20.5095	24.0146	20.2696	16.9979	14.1456	17.5176	15.1581	16.46	28.9479	31.0473	21.0195	17.1349	15.9886	23.8965	18.5568	20.5911	15.8737	18.3053	17.0003	19.2988	20.9699	31.3405	10.578	24.5279	22.9752
605	11.6126	14.4067	11.7235	8.8857	4.2168	14.9932	13.7896	17.1913	13.8971	17.7469	18.9159	13.7539	13.3778	7.5198	17.9285	20.661	17.0109	15.5549	22.2484	20.9656	10.0262	24.6055	26.8906	25.709	20.4445	24.0466	20.2394	17.0262	14.1146	17.4934	15.1483	16.4605	29.017	31.1181	21.0081	17.141	15.9939	23.9021	18.554	20.664	15.8309	18.273	17.0032	19.2819	20.9568	31.3159	10.5531	24.4414	22.9901
606	11.6219	14.4216	11.7407	8.9163	4.2256	15.1002	13.8515	17.2041	13.943	17.8241	18.9996	13.8311	13.4228	7.565	17.9762	20.6967	17.0647	15.5981	22.2745	21.0186	10.0375	24.6617	26.9359	25.751	20.4413	24.1854	20.2984	17.103	14.17	17.512	15.2162	16.5611	29.1178	31.2084	21.0613	17.1687	16.0345	23.9663	18.6338	20.7419	15.845	18.2618	17.0234	19.2926	21.007	31.4464	10.6035	24.4541	23.097
607	11.6266	14.4699	11.7776	8.9262	4.2202	15.1005	13.8985	17.1266	13.9712	17.857	19.0638	13.8615	13.4388	7.5666	17.9669	20.7422	17.0713	15.5791	22.2894	21.0197	10.0473	24.6553	27.0044	25.7441	20.4406	24.2657	20.3084	17.2032	14.1595	17.4943	15.253	16.5797	29.2548	31.3034	21.0936	17.1575	16.0399	24.0106	18.6794	20.796	15.8897	18.2698	17.0981	19.3191	21.0184	31.5199	10.6207	24.4418	23.1611
608	11.6309	14.4993	11.7686	8.9597	4.2283	15.0528	13.9108	17.0263	13.9312	17.88	19.0877	13.8995	13.4019	7.5179	17.9606	20.7392	17.0384	15.5364	22.3209	20.9637	10.0477	24.6439	26.9686	25.6731	20.4219	24.2768	20.2835	17.2179	14.0734	17.4524	15.2313	16.5387	29.2671	31.2977	21.1091	17.1216	15.9999	23.995	18.6595	20.8103	15.9143	18.2831	17.1776	19.3567	21.0071	31.5326	10.6056	24.4192	23.1543
609	11.6594	14.5204	11.791	8.9765	4.2466	15.0218	13.9357	16.9998	13.9206	17.9589	19.1559	13.9975	13.4557	7.5017	18.0178	20.7726	17.1165	15.5756	22.4083	20.9936	10.0536	24.6299	26.9927	25.6717	20.4274	24.3771	20.3176	17.2654	14.0261	17.5012	15.2327	16.5765	29.2884	31.3538	21.1185	17.162	16.0766	24.0712	18.7108	20.8364	15.9406	18.2941	17.1877	19.3657	20.992	31.5913	10.6729	24.5061	23.1531
610	11.6319	14.4777	11.812	8.9565	4.2274	15.0175	13.9455	17.0163	13.9515	18.0066	19.2283	14.0313	13.4961	7.5057	17.9912	20.8245	17.1546	15.6255	22.463	21.0849	10.0288	24.5243	26.969	25.5767	20.3987	24.5286	20.3393	17.2917	13.996	17.5387	15.288	16.6217	29.3186	31.4845	21.1179	17.1852	16.1431	24.1463	18.7992	20.8865	15.9479	18.2932	17.1865	19.308	20.9515	31.5708	10.6221	24.4712	23.0481
611	11.6094	14.4811	11.7778	8.9081	4.2328	15.0092	13.9107	17.0799	13.9249	18.0591	19.2727	14.0488	13.5589	7.5107	17.9656	20.8746	17.1942	15.6391	22.4778	21.1304	10.0104	24.4514	26.9748	25.4813	20.3587	24.609	20.3635	17.3108	14.0067	17.5476	15.3003	16.6158	29.3413	31.5909	21.1214	17.1865	16.1864	24.1972	18.8165	20.9342	15.9238	18.2617	17.1516	19.2393	20.9328	31.5157	10.5706	24.3442	22.9518
612	11.6379	14.5587	11.8185	8.9505	4.2834	14.9789	13.9183	17.1266	13.9419	18.1331	19.3407	14.0766	13.5981	7.517	18.0065	20.877	17.2446	15.6519	22.5119	21.107	10.0532	24.5509	27.1042	25.5302	20.4463	24.6444	20.4063	17.3108	14.0377	17.5671	15.3237	16.6593	29.3861	31.6555	21.1691	17.2053	16.1995	24.2548	18.7978	20.9694	15.9862	18.2725	17.1339	19.2775	21.0615	31.5871	10.6228	24.3531	23.0513
613	11.7322	14.5951	11.8926	9.0064	4.2952	14.9563	13.943	17.1182	14.0029	18.1681	19.3963	14.0885	13.6294	7.5316	18.0041	20.9128	17.264	15.6674	22.5494	21.1076	10.1034	24.6389	27.2546	25.6299	20.5101	24.6776	20.4158	17.3117	14.0446	17.5849	15.3825	16.6856	29.3991	31.713	21.2044	17.2295	16.2101	24.2795	18.8082	21.0063	16.0317	18.2666	17.1843	19.3104	21.1529	31.69	10.6831	24.4085	23.1615
614	11.7964	14.608	11.9926	9.0628	4.3116	14.9412	13.9715	17.1768	14.0443	18.1532	19.4245	14.0979	13.6466	7.5916	18.0113	20.9569	17.2838	15.7104	22.6164	21.1215	10.1403	24.72	27.3912	25.7259	20.6199	24.7679	20.4416	17.2864	14.0377	17.6217	15.4319	16.7439	29.4625	31.7942	21.2575	17.2512	16.232	24.3291	18.8172	20.9857	16.0748	18.3491	17.2179	19.3819	21.2608	31.7615	10.7412	24.4844	23.2415
615	11.8583	14.6398	12.0656	9.1129	4.316	14.9696	13.9957	17.236	14.0668	18.1654	19.4243	14.1263	13.6809	7.6286	18.0177	20.9715	17.268	15.7195	22.6983	21.1341	10.1802	24.7719	27.4588	25.7695	20.6511	24.83	20.4835	17.3069	14.034	17.6188	15.462	16.7762	29.534	31.8477	21.3215	17.2594	16.266	24.3515	18.8535	20.9671	16.1175	18.4183	17.268	19.4142	21.255	31.6503	10.7782	24.5176	23.2619
616	11.8624	14.6428	12.0699	9.0864	4.328	15.006	14.0671	17.3622	14.0814	18.1949	19.4048	14.1537	13.7145	7.6415	18.0732	20.9941	17.3094	15.739	22.7328	21.119	10.1721	24.7022	27.4755	25.7732	20.6147	24.8565	20.5112	17.3481	14.0685	17.6239	15.5033	16.8164	29.5821	31.8743	21.3191	17.3002	16.3039	24.3617	18.8837	20.982	16.1385	18.4208	17.2901	19.4423	21.1812	31.5394	10.7672	24.5433	23.2899
617	11.8094	14.5633	12.0181	9.0237	4.302	15.0187	14.0654	17.4946	14.0579	18.2209	19.4205	14.1501	13.7006	7.6367	18.0796	21.0102	17.3549	15.6895	22.7062	21.1106	10.138	24.5502	27.3768	25.6001	20.4996	24.9103	20.5197	17.3491	14.1078	17.6099	15.5072	16.8096	29.5712	31.842	21.2759	17.31	16.3418	24.4118	18.8829	21.0662	16.0942	18.3835	17.2359	19.4279	21.1102	31.4106	10.7479	24.5192	23.1726
618	11.7436	14.4576	11.9827	9.0114	4.3043	15.0069	14.0721	17.6079	14.0526	18.2563	19.3913	14.1427	13.6452	7.6652	18.0986	21.024	17.3263	15.6935	22.6985	21.1466	10.1042	24.4972	27.2704	25.4531	20.4475	24.9514	20.4898	17.3412	14.1231	17.6186	15.5174	16.8301	29.5625	31.8639	21.2981	17.2465	16.3461	24.4848	18.8787	21.125	16.0482	18.3315	17.1554	19.3993	21.0766	31.3182	10.7251	24.4789	23.0853
619	11.7047	14.4416	11.9797	9.0309	4.3338	15.0418	14.0997	17.7148	14.0566	18.2919	19.4401	14.171	13.6468	7.6919	18.136	21.0151	17.2979	15.7142	22.7893	21.1849	10.0768	24.5475	27.1785	25.3073	20.3839	25.0325	20.49	17.365	14.1549	17.6341	15.5513	16.8329	29.5652	31.9199	21.2988	17.2344	16.4018	24.5121	18.915	21.1941	16.0018	18.2863	17.1253	19.4461	21.1093	31.2459	10.7179	24.4444	23.0134
620	11.7626	14.5233	12.063	9.0891	4.3831	15.0887	14.1508	17.8041	14.1004	18.3075	19.5291	14.2223	13.6744	7.7653	18.2239	21.0668	17.3775	15.7192	22.8585	21.2598	10.1183	24.6637	27.2141	25.32	20.4368	25.1668	20.5322	17.4046	14.2477	17.6574	15.6274	16.8694	29.572	32.0147	21.3639	17.2966	16.517	24.5386	18.9678	21.2686	16.0006	18.2529	17.1006	19.5165	21.221	31.3903	10.7931	24.5176	23.0373
621	11.9	14.6385	12.1677	9.1787	4.4373	15.1699	14.2162	17.8814	14.1617	18.3504	19.5658	14.2907	13.694	7.8068	18.3567	21.1431	17.4548	15.7423	22.8964	21.2828	10.2183	24.8464	27.3456	25.4483	20.5595	25.2717	20.5808	17.4162	14.3278	17.6942	15.7113	16.9382	29.6309	32.124	21.493	17.3512	16.6012	24.5968	19.0147	21.3898	16.0491	18.3007	17.1911	19.5917	21.3563	31.6523	10.866	24.6168	23.1842
622	11.9594	14.7122	12.2066	9.2551	4.4655	15.2727	14.3316	17.9942	14.2126	18.4013	19.6138	14.3646	13.7566	7.8409	18.5256	21.2359	17.5312	15.8285	23.0024	21.3797	10.2697	24.9472	27.3992	25.4949	20.6323	25.3488	20.6477	17.4195	14.4136	17.7824	15.8224	16.9811	29.7558	32.2139	21.616	17.3622	16.6893	24.7875	19.1062	21.5364	16.1159	18.3663	17.2535	19.6537	21.4443	31.7863	10.9174	24.6699	23.2276
623	11.9276	14.7338	12.198	9.2037	4.4405	15.3046	14.351	18.0209	14.2335	18.4027	19.649	14.414	13.7896	7.825	18.5968	21.2424	17.5658	15.8196	23.0139	21.4154	10.251	24.9458	27.3491	25.412	20.6052	25.3527	20.6543	17.4198	14.5129	17.8027	15.8581	16.9889	29.8128	32.3062	21.6717	17.3468	16.7637	24.9289	19.143	21.6657	16.091	18.3309	17.2789	19.6526	21.4832	31.8606	10.8965	24.6587	23.178
624	11.9619	14.8233	12.2449	9.1872	4.4191	15.3832	14.4135	18.04	14.2704	18.468	19.7431	14.5242	13.86	7.8643	18.6817	21.3285	17.6779	15.8484	23.0941	21.4546	10.2768	24.9983	27.3558	25.3789	20.6314	25.4272	20.7202	17.5115	14.5936	17.8739	15.8659	17.0333	29.921	32.478	21.7493	17.4213	16.855	25.0832	19.2505	21.8248	16.1034	18.3541	17.2999	19.6804	21.5044	32.0057	10.9097	24.6936	23.178
625	12.0268	14.8484	12.2903	9.2027	4.4421	15.4634	14.4747	18.0598	14.3349	18.5468	19.8058	14.6232	13.9384	7.8956	18.7579	21.3941	17.7578	15.8779	23.2131	21.4924	10.2814	25.0325	27.3149	25.3768	20.6381	25.4856	20.7666	17.6164	14.643	17.9315	15.8848	17.0635	30.0198	32.5848	21.8618	17.4424	16.9198	25.2587	19.339	21.9732	16.1232	18.3757	17.3153	19.6623	21.4999	32.0063	10.9134	24.6894	23.21
626	12.0949	14.9168	12.3973	9.2867	4.5075	15.5036	14.5266	18.0211	14.3639	18.5525	19.7966	14.6648	13.935	7.865	18.7998	21.3834	17.7532	15.8943	23.1932	21.4647	10.3288	25.1175	27.377	25.4478	20.7037	25.5036	20.7592	17.6332	14.6145	17.9088	15.893	17.0524	30.063	32.6821	21.876	17.4424	16.9597	25.285	19.3303	21.9889	16.0309	18.3467	17.317	19.7169	21.4916	32.089	10.9721	24.7832	23.2442
627	12.1016	14.9251	12.4088	9.3257	4.5308	15.503	14.5574	17.999	14.3883	18.5353	19.8134	14.6617	13.9383	7.8421	18.801	21.4087	17.7508	15.8892	23.2313	21.4398	10.3249	25.1097	27.4426	25.4406	20.7168	25.5252	20.7828	17.6605	14.6595	17.8815	15.9224	17.0783	30.0813	32.7619	21.8728	17.4224	17.0296	25.3385	19.3828	22.0185	15.9991	18.3365	17.3057	19.7578	21.5099	32.0976	10.9688	24.8185	23.2234
628	12.0825	14.9016	12.3966	9.3277	4.5365	15.5065	14.5771	17.9362	14.4096	18.5364	19.8215	14.6695	13.9407	7.8514	18.7579	21.4577	17.754	15.8812	23.2547	21.4339	10.2792	25.0576	27.4505	25.4105	20.6601	25.561	20.7931	17.7056	14.6689	17.868	15.9475	17.0699	30.1394	32.8123	21.8645	17.4086	17.1046	25.437	19.4128	22.0684	16.0272	18.2334	17.2543	19.8007	21.575	32.1375	10.947	24.8249	23.1297
629	12.1377	14.9909	12.4775	9.3432	4.5775	15.5522	14.6126	17.9262	14.4305	18.5994	19.8873	14.7291	14.0385	7.933	18.7619	21.5484	17.7916	15.9162	23.3166	21.4367	10.3214	25.1169	27.5706	25.4934	20.7212	25.6605	20.8956	17.8372	14.7193	17.9741	15.996	17.0973	30.255	32.978	21.9477	17.4999	17.1881	25.5517	19.491	22.2182	16.0851	18.2548	17.2714	19.8884	21.7608	32.2249	10.9536	24.8214	23.1933
630	12.2167	15.0609	12.5449	9.3819	4.6205	15.5906	14.5647	17.9175	14.4314	18.6376	20.0018	14.8149	14.134	7.9755	18.816	21.6084	17.8835	16.0051	23.4034	21.4835	10.3732	25.1721	27.6809	25.6099	20.8109	25.7886	20.9963	17.9586	14.782	18.0115	16.0443	17.1688	30.3922	33.1733	22.0819	17.5836	17.321	25.7402	19.6185	22.3781	16.1502	18.3051	17.2853	19.9814	21.8308	32.1424	11.0185	24.8864	23.3658
631	12.244	15.0753	12.5747	9.4551	4.666	15.5715	14.5379	17.8358	14.449	18.6689	20.0982	14.8852	14.1901	7.9887	18.8404	21.6984	17.9605	16.0277	23.4459	21.5706	10.4634	25.2497	27.7447	25.6712	20.911	25.8457	21.0315	18.0574	14.8309	18.0323	16.0422	17.2043	30.4914	33.2864	22.1857	17.6167	17.4247	25.903	19.6872	22.439	16.129	18.2583	17.2405	20.1103	21.9201	31.9759	11.0393	24.9042	23.4608
632	12.2759	15.1366	12.6122	9.5265	4.7091	15.5529	14.5542	17.7497	14.4947	18.7333	20.1872	14.8851	14.2058	8.011	18.8885	21.7712	18.032	16.0328	23.5177	21.5987	10.5442	25.3352	27.9006	25.8106	21.0072	25.9441	21.0654	18.1555	14.8943	18.0893	16.0451	17.2226	30.5961	33.4605	22.2429	17.6849	17.5438	26.0035	19.7254	22.5124	16.1123	18.2628	17.2437	20.2337	21.9755	31.9103	11.0222	24.9857	23.5109
633	12.3039	15.1908	12.6194	9.5374	4.7288	15.5293	14.522	17.702	14.5364	18.7742	20.2259	14.898	14.2748	8.0123	18.8801	21.8186	18.0799	16.0444	23.6089	21.6407	10.5541	25.3558	27.9853	25.8594	21.046	26.027	21.0974	18.2457	14.9243	18.1325	16.0135	17.2414	30.7	33.6396	22.2568	17.6839	17.6229	26.126	19.7717	22.6238	16.1262	18.2553	17.2703	20.2945	22.0175	31.9812	10.9988	25.0746	23.5128
634	12.3693	15.2732	12.6678	9.5881	4.7599	15.5443	14.5159	17.6947	14.5589	18.7853	20.2809	14.9291	14.313	7.9972	18.8948	21.873	18.1547	16.0389	23.6202	21.6604	10.5655	25.4172	28.0714	25.8642	21.1122	26.1275	21.1537	18.2943	14.904	18.166	16.0221	17.2547	30.7923	33.8118	22.3394	17.6733	17.7122	26.2628	19.8146	22.6876	16.1407	18.2729	17.3476	20.4037	22.1559	32.1314	11.0139	25.2521	23.5807
635	12.4131	15.3199	12.7076	9.5886	4.7968	15.5205	14.5147	17.763	14.5586	18.7942	20.2876	14.9851	14.3292	8.0457	18.9529	21.9021	18.1903	16.0527	23.6188	21.6769	10.6008	25.4872	28.1484	25.8292	21.1256	26.307	21.2312	18.3084	14.9192	18.1813	16.0877	17.3061	30.853	33.9642	22.454	17.6369	17.8356	26.4158	19.8498	22.7694	16.186	18.3112	17.3802	20.4248	22.2174	32.2333	11.0443	25.3183	23.602
636	12.4682	15.3848	12.7111	9.5954	4.8145	15.514	14.5691	17.8244	14.5532	18.8579	20.2848	15.0525	14.3649	8.0732	18.9888	21.9394	18.245	16.0531	23.6985	21.6841	10.6252	25.5779	28.2641	25.8668	21.2228	26.4541	21.2369	18.3755	14.946	18.2307	16.1603	17.3313	30.8679	34.0458	22.4997	17.5843	17.9438	26.6242	19.8989	22.8535	16.2109	18.3311	17.3967	20.4571	22.33	32.4347	11.1169	25.3985	23.6198
637	12.6483	15.5478	12.8401	9.6986	4.9023	15.503	14.6074	17.8738	14.5971	18.9467	20.3431	15.0992	14.3846	8.09	19.0105	21.9779	18.3207	16.0796	23.8083	21.7384	10.7067	25.7762	28.4931	26.0061	21.4583	26.5926	21.2688	18.4537	14.965	18.2993	16.2087	17.3455	30.9823	34.2006	22.5483	17.6244	18.0377	26.823	20.0143	22.9788	16.2651	18.3862	17.4667	20.5347	22.3814	32.6494	11.2545	25.5532	23.8219
638	12.6916	15.6445	12.9066	9.7572	4.9618	15.5618	14.5657	17.9338	14.6227	19.0012	20.4372	15.1704	14.4558	8.1466	19.0639	22.0627	18.4008	16.0921	23.8906	21.79	10.7375	25.7998	28.5531	26.0264	21.5425	26.7459	21.3641	18.5238	15.038	18.3422	16.229	17.3627	31.0774	34.3309	22.6012	17.7256	18.1963	27.013	20.0547	23.1091	16.191	18.3561	17.3959	20.581	22.3996	32.756	11.2309	25.6047	23.873
639	12.7289	15.7297	12.9661	9.7337	4.975	15.6067	14.558	18.0053	14.6226	18.9537	20.408	15.1942	14.4545	8.1779	19.1069	22.1268	18.427	16.1076	23.9274	21.7799	10.7926	25.8681	28.666	26.0439	21.6258	26.8492	21.3804	18.541	15.0844	18.368	16.2026	17.366	31.13	34.4123	22.6479	17.8069	18.3335	27.1815	20.0772	23.2107	16.0849	18.3268	17.355	20.6856	22.5261	32.898	11.2687	25.6503	23.9041
640	12.8117	15.8547	13.0094	9.807	5.0333	15.6662	14.6072	18.0965	14.6566	18.897	20.3989	15.2269	14.4152	8.1512	19.1671	22.1371	18.4699	16.1119	23.9379	21.7938	10.8523	25.9532	28.7843	26.1211	21.6565	26.9667	21.4079	18.6078	15.1264	18.3747	16.2033	17.4258	31.1167	34.4688	22.6681	17.8641	18.4325	27.3066	20.0933	23.2951	16.0844	18.3921	17.4521	20.7934	22.7149	32.9927	11.3066	25.7269	23.953
641	12.8066	15.9468	12.9872	9.8519	5.0091	15.7502	14.6669	18.2344	14.6798	18.912	20.4389	15.305	14.4163	8.1877	19.1903	22.1861	18.552	16.1323	23.9666	21.7873	10.8703	25.963	28.7881	26.0918	21.6125	27.1251	21.4782	18.7003	15.159	18.4532	16.2703	17.4764	31.1773	34.5992	22.7313	17.9227	18.5245	27.4309	20.1718	23.4072	16.1245	18.4186	17.4554	20.8656	22.8065	33.0329	11.3282	25.7543	23.8893
642	12.8336	16.0474	13.0578	9.9263	5.038	15.8265	14.7481	18.3307	14.7202	18.9424	20.4574	15.3457	14.4175	8.1967	19.2138	22.2323	18.613	16.1744	24.0253	21.8131	10.9635	26.0642	28.8744	26.1719	21.6826	27.2534	21.5717	18.7124	15.2214	18.5188	16.3303	17.5032	31.2601	34.7087	22.8019	17.9868	18.6159	27.6232	20.2218	23.5048	16.1196	18.4556	17.4393	20.9592	22.9569	33.2018	11.3903	25.8919	23.9819
643	12.9044	16.1873	13.1925	10.0267	5.1153	15.9021	14.8341	18.4031	14.7969	18.9578	20.3901	15.4182	14.4391	8.2216	19.2892	22.3107	18.6656	16.1778	24.0855	21.853	11.0314	26.1165	28.9791	26.2705	21.7214	27.4505	21.6299	18.7102	15.2577	18.543	16.4171	17.5666	31.3862	34.8966	22.8679	18.0208	18.707	27.881	20.239	23.6969	16.2083	18.5148	17.5498	21.1141	23.0545	33.3123	11.4372	25.9787	24.0378
644	12.9924	16.2885	13.3135	10.0861	5.1938	15.9547	14.9572	18.5758	14.9323	19.0513	20.427	15.4972	14.4922	8.3112	19.4758	22.362	18.7598	16.2146	24.2462	22.0273	11.0821	26.2073	29.1538	26.2385	21.8568	27.7604	21.7829	18.8088	15.3525	18.674	16.4973	17.6803	31.4842	35.0072	22.9878	18.0817	18.8585	28.0998	20.3363	23.906	16.2545	18.5417	17.631	21.2104	23.1286	33.3672	11.4444	26.056	24.1173
645	13.1152	16.3761	13.3962	10.1153	5.285	16.0453	15.0083	18.672	14.9289	19.1352	20.4636	15.5384	14.5264	8.3735	19.5976	22.4513	18.8928	16.2682	24.3091	22.1635	11.1371	26.3394	29.2701	26.2263	21.9838	27.9652	21.8774	18.8336	15.4203	18.7813	16.5058	17.8459	31.5746	35.1591	23.0827	18.1559	19.0378	28.3358	20.4763	24.1062	16.2614	18.5861	17.7177	21.3341	23.1593	33.3629	11.5264	26.1039	24.2636
646	13.0596	16.2472	13.371	10.0822	5.2706	16.0961	15.035	18.6698	14.9195	19.2178	20.4407	15.5747	14.5427	8.3736	19.6417	22.5149	18.9254	16.2975	24.3119	22.0636	11.0767	26.2615	29.2198	26.1313	21.8997	28.0614	21.8417	18.8487	15.4233	18.7945	16.4619	17.8619	31.4985	35.2341	23.0349	18.1778	19.1488	28.5045	20.5294	24.2197	16.1894	18.5428	17.6459	21.4138	23.1808	33.3088	11.5198	26.0851	24.2583
647	13.0438	16.2042	13.3615	10.1113	5.2768	16.1098	15.0858	18.698	14.9714	19.277	20.4583	15.6159	14.5599	8.4193	19.6692	22.5923	19.0021	16.3035	24.376	22.002	11.1061	26.2331	29.23	26.0638	21.8792	28.2272	21.8765	18.9251	15.5	18.8029	16.4696	17.8873	31.4993	35.1941	23.0428	18.1473	19.3073	28.7064	20.5413	24.413	16.2055	18.5712	17.6072	21.4664	23.2014	33.2206	11.5638	26.1394	24.2416
648	13.0497	16.2277	13.3885	10.072	5.296	16.1049	15.1342	18.7487	14.9667	19.2284	20.4959	15.6504	14.6087	8.4182	19.626	22.5918	19.091	16.3082	24.4408	21.9663	11.0936	26.1991	29.2841	26.0572	21.8717	28.3366	21.973	19.012	15.5339	18.8837	16.5267	17.9171	31.5512	35.3079	23.1029	18.1229	19.4502	28.7956	20.6277	24.5953	16.1276	18.5399	17.604	21.4939	23.2707	33.0831	11.5841	26.2407	24.1692
649	13.135	16.3514	13.4467	10.1231	5.3691	16.1392	15.1118	18.7528	14.9601	19.2383	20.589	15.7265	14.6734	8.4089	19.6675	22.5616	19.1268	16.3382	24.4842	21.9789	11.0945	26.2506	29.4469	26.1412	22.035	28.4351	21.9791	18.9734	15.5265	18.9351	16.5538	17.9471	31.6322	35.4927	23.1044	18.1103	19.5436	28.922	20.7276	24.7027	16.1308	18.4594	17.6075	21.5818	23.3843	33.1304	11.6036	26.3683	24.2835
650	13.2104	16.474	13.5281	10.2133	5.4509	16.1744	15.2478	18.8122	15.0113	19.3183	20.7592	15.7872	14.8	8.4775	19.7237	22.6884	19.2343	16.452	24.5523	22.0555	11.2209	26.3423	29.53	26.2327	22.0855	28.5542	22.0627	19.1055	15.557	19.0134	16.6123	17.9932	31.7495	35.6875	23.213	18.2023	19.7593	29.1638	20.8224	24.8196	16.1374	18.4372	17.5801	21.6787	23.4708	33.1527	11.6791	26.4417	24.3282
651	13.2878	16.5625	13.5704	10.3239	5.4786	16.1439	15.2539	18.8012	15.0089	19.2978	20.8507	15.849	14.8462	8.5142	19.7549	22.7515	19.2416	16.4319	24.5803	22.0419	11.3161	26.4408	29.643	26.2881	22.1599	28.6506	22.0881	19.1952	15.5169	19.0201	16.6223	17.996	31.8069	35.7223	23.2567	18.1509	19.9396	29.3417	20.7922	24.9618	16.054	18.3926	17.5123	21.8585	23.5778	33.3474	11.6935	26.576	24.2921
652	13.3353	16.6697	13.566	10.3395	5.4849	16.1659	15.2493	18.8101	15.0889	19.3325	20.9467	15.9485	14.8496	8.5516	19.8116	22.8226	19.3835	16.4065	24.6559	22.1092	11.3436	26.5693	29.7855	26.3412	22.2853	28.8267	22.1908	19.2291	15.5119	19.1481	16.5861	18.0729	31.9212	35.8836	23.3587	18.1616	20.1239	29.6442	20.9481	25.1963	16.0143	18.372	17.574	21.8284	23.5922	33.4886	11.6748	26.6439	24.3249
653	13.3373	16.7388	13.5717	10.3619	5.5399	16.1645	15.2263	18.7623	15.1389	19.3957	20.965	16.0858	14.8687	8.5937	19.8839	22.9259	19.5577	16.432	24.7577	22.1614	11.3542	26.6651	29.8427	26.2888	22.2809	28.9502	22.2335	19.335	15.6104	19.2307	16.6092	18.1088	32.0156	36.0275	23.4959	18.2698	20.357	29.8256	21.1188	25.4016	16.089	18.3752	17.6819	21.8352	23.6392	33.5314	11.6608	26.6452	24.3363
654	13.4321	16.8588	13.6064	10.4676	5.5936	16.1512	15.2067	18.6153	15.0798	19.4115	20.9855	16.1678	14.9173	8.6058	19.8716	22.9462	19.6454	16.3776	24.8209	22.1701	11.3674	26.7537	29.9553	26.3756	22.3476	29.0086	22.1987	19.365	15.6838	19.2838	16.622	18.0899	32.0377	36.1335	23.5373	18.3225	20.5341	30.0479	21.1403	25.4918	16.1577	18.3906	17.6532	22.0092	23.8177	33.6476	11.693	26.768	24.4091
655	13.5183	17.0448	13.7711	10.5324	5.6669	16.1424	15.1709	18.5328	15.1188	19.398	21.0785	16.1988	14.9323	8.6711	19.887	22.95	19.7029	16.4247	24.8242	22.1993	11.4467	26.806	29.9884	26.4092	22.5096	29.0154	22.1628	19.4244	15.6772	19.3071	16.7035	18.0661	32.0765	36.2489	23.5814	18.2835	20.6637	30.1892	21.1349	25.5462	16.1243	18.3412	17.5701	22.1732	23.8825	33.8674	11.7459	26.9454	24.5236
656	13.4972	17.0738	13.8411	10.5678	5.7524	16.1924	15.2051	18.5578	15.2083	19.4682	21.0871	16.2767	14.9466	8.7258	19.9326	23.0505	19.7273	16.5122	24.8976	22.2697	11.5154	26.7955	30.1156	26.472	22.5742	29.1304	22.2514	19.5278	15.7535	19.3432	16.7224	18.1483	32.2018	36.3556	23.5987	18.3263	20.8419	30.4654	21.2854	25.6867	16.0362	18.2821	17.5503	22.4126	24.0721	34.1394	11.8166	27.1223	24.5899
657	13.5232	17.1291	13.884	10.6434	5.7345	16.2703	15.3784	18.6492	15.2792	19.5569	21.1341	16.371	15.0326	8.789	19.9685	23.1481	19.8222	16.5519	25.0409	22.3307	11.5515	26.7556	30.1292	26.4587	22.6533	29.3327	22.3943	19.5711	15.8644	19.3931	16.8227	18.1979	32.4023	36.5308	23.6873	18.3366	21.068	30.7666	21.4156	25.8825	16.1544	18.358	17.6621	22.5139	24.2517	34.2745	11.8672	27.2435	24.677
658	13.6525	17.2869	13.95	10.7235	5.846	16.2542	15.3505	18.6983	15.3082	19.5604	21.1562	16.4681	15.0988	8.7936	20.0222	23.2021	19.8397	16.5819	25.0875	22.3401	11.6993	26.7945	30.2366	26.4827	22.6769	29.4613	22.5382	19.5403	15.9552	19.4914	16.9565	18.2736	32.4016	36.5824	23.6823	18.3503	21.2363	30.9105	21.504	26.0317	16.1772	18.3305	17.7687	22.6077	24.4346	34.5197	11.9571	27.456	24.7634
659	13.7546	17.4048	13.9891	10.8183	5.8904	16.2923	15.3394	18.7349	15.3517	19.5995	21.1716	16.5184	15.2089	8.8674	20.0463	23.2991	19.9225	16.6301	25.1478	22.475	11.7371	26.844	30.3902	26.516	22.6988	29.5781	22.5704	19.5908	16.0286	19.5987	17.0775	18.3129	32.555	36.6415	23.8092	18.4805	21.3645	31.0856	21.4983	26.1146	16.1903	18.3398	17.7574	22.6669	24.4391	34.6079	12.0277	27.4971	24.6935
660	13.7192	17.4581	14.0041	10.8166	5.958	16.3657	15.3634	18.6884	15.3735	19.6422	21.1795	16.575	15.1892	8.9323	20.1039	23.3312	20.0263	16.6516	25.2397	22.4772	11.7119	26.8616	30.478	26.4896	22.7587	29.5647	22.5489	19.7212	16.1131	19.6629	17.1143	18.3325	32.5943	36.6017	23.9295	18.5055	21.5074	31.3027	21.489	26.1847	16.1643	18.4267	17.8095	22.7737	24.5895	34.738	12.0991	27.4736	24.7377
661	13.6762	17.4884	14.0473	10.8077	5.9162	16.3368	15.3679	18.6164	15.3653	19.6695	21.113	16.5025	15.1183	8.905	20.1796	23.2675	20.0907	16.5778	25.2412	22.4247	11.6673	26.8401	30.4721	26.4583	22.772	29.5704	22.5117	19.7805	16.078	19.6134	17.1154	18.3493	32.6153	36.6638	23.933	18.4978	21.5356	31.5494	21.5305	26.169	16.133	18.4805	17.866	22.7859	24.6183	34.7446	12.0564	27.4886	24.7448
662	13.7493	17.5156	14.1137	10.821	5.9703	16.4158	15.3502	18.6593	15.3331	19.7118	21.2221	16.5216	15.1218	8.9208	20.2542	23.2802	20.1759	16.5953	25.263	22.4425	11.7269	26.9201	30.5279	26.4506	22.7197	29.7241	22.6307	19.8682	16.1076	19.655	17.1857	18.3516	32.7329	36.8765	24.0312	18.517	21.6974	31.7963	21.588	26.2935	15.9949	18.3359	17.822	22.7798	24.71	34.6612	12.0593	27.548	24.7248
663	13.8597	17.7025	14.2183	10.923	6.0724	16.4943	15.3569	18.7299	15.3483	19.7346	21.2883	16.5879	15.1252	8.9839	20.3169	23.3424	20.1933	16.6241	25.336	22.4538	11.8727	27.0479	30.7679	26.4923	22.7802	29.9228	22.7867	19.9784	16.1894	19.7729	17.3213	18.4365	32.8253	37.1951	24.1512	18.5726	21.9241	31.9948	21.6512	26.4653	16.0233	18.2694	17.8287	22.9425	24.9085	34.7198	12.1068	27.708	24.7561
664	13.9925	17.8759	14.3143	11.0446	6.1762	16.7088	15.4872	18.877	15.5001	19.8202	21.337	16.6987	15.2152	9.0343	20.4883	23.5238	20.3299	16.7257	25.4377	22.5837	11.9938	27.1339	31.0053	26.6291	22.9178	30.1511	22.9313	20.174	16.3837	19.902	17.4354	18.6127	32.97	37.367	24.2864	18.6622	22.171	32.2219	21.7319	26.7227	16.1146	18.3507	17.9508	23.1294	25.0848	34.8605	12.2369	27.8329	24.8254
665	14.0245	18.0535	14.446	11.1772	6.2196	16.8375	15.536	18.9863	15.5742	19.9049	21.4455	16.7975	15.277	9.1205	20.6207	23.6539	20.4517	16.8097	25.5724	22.6127	12.1106	27.1937	31.1241	26.7044	22.9837	30.3363	22.9845	20.229	16.4652	19.9515	17.5287	18.7081	33.0555	37.5286	24.4495	18.7228	22.3462	32.5715	21.8593	26.9553	16.1717	18.4602	18.0999	23.1761	25.154	34.8172	12.3087	27.8965	24.8129
666	14.0243	18.0908	14.4748	11.2175	6.259	16.8924	15.6448	19.168	15.6481	19.9519	21.5095	16.942	15.3322	9.1976	20.7347	23.7329	20.5385	16.896	25.7446	22.6397	12.0734	27.1992	31.1175	26.6679	22.9774	30.5296	23.0077	20.3226	16.4926	19.9531	17.62	18.7174	33.0991	37.6459	24.6248	18.8432	22.5411	32.9353	21.972	27.0875	16.2171	18.4674	18.1456	23.1554	25.113	34.7598	12.2426	27.8708	24.7736
667	14.0169	18.1496	14.4014	11.1899	6.1887	16.7808	15.5521	19.1519	15.5236	19.8619	21.4478	16.8824	15.235	9.1156	20.7075	23.6726	20.5608	16.7941	25.7728	22.5578	11.9828	27.2252	31.0786	26.6477	22.9602	30.566	22.9897	20.3391	16.4243	19.9115	17.5832	18.6032	32.9615	37.6542	24.5785	18.7844	22.6047	33.1518	21.9928	27.2891	16.1479	18.3604	18.1249	23.2508	25.1335	34.716	12.1671	27.9061	24.7955
668	14.0265	18.2245	14.3324	11.1381	6.1615	16.7936	15.5282	19.2514	15.4779	19.849	21.5005	16.944	15.2268	9.0602	20.6763	23.7108	20.5828	16.7624	25.7376	22.5214	11.9907	27.3112	31.1673	26.6268	22.9718	30.6812	23.0906	20.3597	16.3751	19.919	17.5282	18.4957	32.8917	37.641	24.58	18.7276	22.7752	33.4451	22.0565	27.4708	16.1905	18.2761	17.9984	23.4255	25.2152	34.8886	12.1389	28.0251	24.8577
669	14.1687	18.3838	14.4719	11.2512	6.2867	16.8437	15.6575	19.4146	15.4732	19.8175	21.5354	17.0741	15.2646	9.127	20.6957	23.7948	20.6527	16.8513	25.7042	22.4923	12.1238	27.4502	31.19	26.7047	23.0674	30.7793	23.1245	20.4207	16.349	19.9691	17.5243	18.424	32.8893	37.7364	24.5714	18.7007	22.9775	33.6772	22.0921	27.4908	16.2168	18.3426	17.9776	23.6461	25.435	35.0903	12.2899	28.3209	25.0187
670	14.1989	18.4396	14.579	11.3215	6.3913	16.789	15.7091	19.4315	15.4756	19.8021	21.4852	17.0734	15.2256	9.0588	20.7266	23.7739	20.5917	16.8214	25.7369	22.4892	12.2054	27.3724	31.1339	26.6807	23.0312	30.9547	23.0902	20.4309	16.3298	19.9355	17.568	18.3558	32.8815	37.8252	24.5804	18.7493	23.1296	33.7496	22.0823	27.5434	16.229	18.4334	18.0839	23.7931	25.5318	35.2291	12.3769	28.4787	25.0111
671	14.1989	18.4594	14.5803	11.355	6.3539	16.8807	15.8188	19.4763	15.5994	19.8852	21.5796	17.1208	15.3613	9.1816	20.8982	23.8178	20.6617	16.9423	25.9243	22.5917	12.2422	27.3118	31.1405	26.5844	22.9581	31.2605	23.1856	20.6272	16.4632	19.9979	17.6897	18.4551	32.923	37.9158	24.7375	18.8212	23.3003	34.0261	22.1312	27.9352	16.1897	18.4119	18.0901	23.8384	25.4885	35.2972	12.4229	28.5107	24.9883
672	14.1798	18.5432	14.5995	11.3175	6.3778	17.0083	15.9734	19.6321	15.6384	19.9455	21.6469	17.1897	15.5225	9.2976	20.9209	23.8954	20.8121	17.0368	26.0521	22.7469	12.3252	27.3877	31.2421	26.4829	22.9901	31.5255	23.2506	20.787	16.7105	20.102	17.7719	18.5714	32.9785	38.182	24.8515	18.8665	23.538	34.4545	22.3058	28.2721	16.188	18.4419	18.1308	23.928	25.4898	35.3593	12.4628	28.5788	25.0261
673	14.1421	18.5279	14.6684	11.3287	6.3405	17.0253	16.0003	19.7044	15.5918	20.0027	21.5848	17.1768	15.5535	9.2967	20.8298	23.9744	20.8995	16.9247	26.0254	22.7823	12.296	27.4656	31.297	26.4383	22.9931	31.6386	23.1549	20.7591	16.7764	20.0406	17.7092	18.4978	32.9999	38.25	24.8887	18.9155	23.6777	34.6895	22.2639	28.3548	16.2172	18.5013	18.0792	24.0009	25.6183	35.5254	12.5064	28.6747	25.0495
674	14.2322	18.6651	14.7948	11.4558	6.4595	17.0852	16.0627	19.78	15.6612	20.0639	21.6548	17.309	15.6241	9.3288	20.8795	24.1008	20.9211	16.9317	26.0801	22.8011	12.3539	27.6789	31.4201	26.5747	23.0981	31.7784	23.1875	20.7645	16.8249	20.0457	17.7558	18.5328	32.9982	38.3449	25.0574	18.992	23.9023	34.8548	22.3319	28.5214	16.3112	18.5374	18.1392	24.1213	25.8443	35.8631	12.6263	28.9012	25.1351
675	14.2499	18.7419	14.7835	11.4582	6.5232	17.1139	16.1032	19.8447	15.7181	20.0603	21.6242	17.3545	15.6684	9.3795	20.9307	24.2083	20.9851	17.0061	26.167	22.7099	12.3673	27.6664	31.468	26.5096	23.0989	31.9297	23.2761	20.7715	16.8302	20.0746	17.8278	18.5411	32.8642	38.4406	25.1562	18.9429	24.109	35.1806	22.5159	28.6541	16.3196	18.5264	18.1638	24.187	25.9302	35.9543	12.6278	28.9836	25.1763
676	14.2708	18.8681	14.7891	11.4536	6.4998	17.0418	16.1402	19.8817	15.7312	20.0208	21.6084	17.3213	15.7144	9.3682	20.9204	24.1976	21.0515	17.0699	26.2145	22.7225	12.374	27.5715	31.5188	26.4363	23.0644	32.1175	23.2792	20.7844	16.844	20.0917	17.7942	18.4954	32.7236	38.545	25.1225	18.9394	24.2162	35.3869	22.5351	28.8035	16.3208	18.5043	18.1749	24.2419	26.0279	35.912	12.6788	29.0674	25.1911
677	14.3066	18.895	14.8214	11.4521	6.4978	16.9936	16.1881	19.8691	15.687	19.9866	21.6133	17.3311	15.7318	9.4268	20.8964	24.1481	21.0826	17.0101	26.2092	22.698	12.3423	27.6226	31.5724	26.4657	23.0532	32.1827	23.2394	20.7882	16.8286	20.1052	17.7775	18.4961	32.6978	38.6134	25.1103	18.9658	24.3292	35.578	22.5354	28.8936	16.319	18.4797	18.1418	24.382	26.114	35.9549	12.7141	29.1517	25.2084
678	14.4082	19.0328	14.8652	11.4599	6.5601	16.9923	16.2796	19.8548	15.742	20.0242	21.6954	17.4119	15.8966	9.4579	20.9457	24.1767	21.1598	17.0145	26.2482	22.7834	12.4416	27.6363	31.6375	26.5611	23.0845	32.2819	23.212	20.816	16.8641	20.1142	17.7952	18.5808	32.7487	38.6502	25.1485	18.9544	24.5828	35.821	22.5813	28.997	16.3056	18.537	18.1334	24.414	26.1355	35.9406	12.7966	29.2153	25.2212
679	14.4452	19.1512	14.9519	11.5169	6.5532	16.986	16.3094	19.8459	15.7872	20.0083	21.8033	17.5257	15.9781	9.4794	21.0758	24.2366	21.2126	17.0418	26.3542	22.7845	12.4438	27.6753	31.6885	26.5716	23.0569	32.3385	23.2139	20.9161	16.8858	20.1724	17.8102	18.6562	32.7114	38.6786	25.2471	18.967	24.8062	36.0589	22.6955	29.1327	16.3256	18.5875	18.1877	24.4003	26.3081	36.0223	12.7828	29.3011	25.2137
680	14.4557	19.2376	15.0046	11.5877	6.4547	17.0348	16.2818	19.899	15.8624	20.1021	21.9007	17.5726	16.0176	9.5653	21.1574	24.362	21.3761	17.1166	26.4222	22.8538	12.4574	27.852	31.8542	26.633	23.1235	32.4859	23.2988	21.0113	16.9426	20.2262	17.8709	18.748	32.7467	38.8506	25.3724	18.9893	25.0059	36.4439	22.791	29.3175	16.318	18.5859	18.2612	24.472	26.4947	36.1742	12.7921	29.4066	25.3247
681	14.6115	19.4	15.0634	11.6954	6.5278	17.0736	16.2477	19.8954	15.8558	20.1822	21.9169	17.6446	16.006	9.5842	21.1706	24.3945	21.4325	17.1189	26.4913	22.8659	12.5328	28.0355	31.9791	26.7027	23.2827	32.5565	23.3708	21.0449	16.9121	20.2225	17.9378	18.7416	32.7665	38.9974	25.4235	18.945	25.104	36.7319	22.783	29.4079	16.3091	18.6438	18.296	24.5969	26.6221	36.3312	12.8709	29.4997	25.3863
682	14.6178	19.4081	15.0547	11.695	6.5889	17.1524	16.1808	19.8391	15.8515	20.2052	21.8756	17.6856	15.9037	9.5811	21.1641	24.4294	21.4022	17.1026	26.5187	22.8513	12.5295	27.9205	31.9875	26.7362	23.3191	32.558	23.465	21.1196	16.8692	20.2312	17.9173	18.7042	32.6885	38.9518	25.4299	18.8668	25.1994	36.9478	22.7618	29.4939	16.336	18.6189	18.2011	24.69	26.6384	36.2865	12.9031	29.6252	25.4041
683	14.6183	19.4449	15.0618	11.7566	6.6331	17.2931	16.211	19.8102	15.964	20.3235	21.9459	17.7736	15.9725	9.6699	21.2765	24.4251	21.3776	17.126	26.5704	22.8722	12.5873	27.8651	31.9675	26.701	23.3525	32.6374	23.5858	21.2332	16.9919	20.2874	18.0501	18.7369	32.6972	38.9661	25.4631	18.9558	25.3038	37.1977	22.9145	29.6011	16.417	18.6222	18.2213	24.8687	26.7286	36.2284	12.9526	29.692	25.3584
684	14.5697	19.5323	15.1348	11.735	6.6693	17.2915	16.2319	19.8044	15.9688	20.3238	21.9999	17.831	15.9867	9.6227	21.2674	24.4507	21.3736	17.1534	26.6165	22.878	12.5696	27.8272	31.8711	26.5612	23.3888	32.6698	23.6229	21.3428	17.0535	20.2553	17.9413	18.8238	32.6482	39.0626	25.4961	18.9593	25.4076	37.4123	22.9357	29.5988	16.4476	18.701	18.2594	25.0305	26.7311	36.2998	13.0246	29.7494	25.3558
685	14.5496	19.5696	15.1821	11.7423	6.7257	17.336	16.2564	19.7824	16.0055	20.3033	22.0184	17.8821	16.0636	9.6336	21.3272	24.4619	21.4427	17.1895	26.7103	22.8749	12.5451	27.8833	31.9672	26.5325	23.3426	32.7331	23.6493	21.5159	17.0671	20.2479	17.9112	18.8233	32.6473	39.0695	25.645	18.9406	25.5249	37.6238	22.9259	29.667	16.4888	18.7238	18.2853	25.098	26.7245	36.382	13.0915	29.9005	25.4754
686	14.6149	19.724	15.2519	11.7512	6.7812	17.3909	16.3	19.7758	16.0501	20.323	22.1089	18.0301	16.1775	9.6706	21.4698	24.5061	21.5999	17.2229	26.7921	23.0054	12.638	27.9895	32.1238	26.6432	23.4449	32.8648	23.6906	21.631	17.228	20.4043	17.9849	18.8989	32.7491	39.2137	25.7769	18.9951	25.7288	37.7985	22.9914	29.6883	16.4601	18.7276	18.2841	25.3034	26.82	36.5622	13.1088	29.9455	25.5177
687	14.6706	19.8213	15.3074	11.8386	6.8261	17.4661	16.3994	19.841	16.1673	20.4349	22.2651	18.2364	16.3131	9.8295	21.6539	24.7014	21.7035	17.3304	26.8577	23.1119	12.7427	27.9736	32.1341	26.7014	23.4726	33.0458	23.7836	21.782	17.3874	20.6072	18.0607	19.049	32.8512	39.425	25.7427	19.0813	25.9519	38.0264	23.1702	29.8396	16.4485	18.7714	18.3167	25.2807	26.8127	36.5103	13.1386	29.9725	25.5035
688	14.6833	19.7883	15.3057	11.8103	6.8047	17.4751	16.3705	19.8857	16.2136	20.506	22.3194	18.3283	16.3602	9.901	21.7072	24.8058	21.739	17.4044	26.8848	23.1722	12.7697	27.8512	32.149	26.6991	23.5046	33.279	23.861	21.8551	17.4413	20.7456	18.1107	19.092	32.8882	39.4659	25.7685	19.1005	26.1025	38.1318	23.3129	30.1069	16.3961	18.7104	18.3322	25.3867	26.874	36.3988	13.1817	29.9289	25.4606
689	14.7829	19.8061	15.3159	11.8732	6.8721	17.5479	16.3706	19.947	16.2644	20.5553	22.3844	18.4711	16.3817	10.0206	21.7636	24.849	21.8199	17.5188	26.9289	23.1967	12.8132	27.8136	32.0965	26.6019	23.4739	33.5637	24.0184	21.9126	17.5477	20.9071	18.1822	19.1662	33.1038	39.5622	25.8166	19.1684	26.2952	38.3616	23.4352	30.3475	16.4639	18.7014	18.3575	25.4941	26.8257	36.3866	13.2055	29.9703	25.4167
690	14.8895	19.8467	15.4329	12.0089	7.0162	17.6866	16.4928	20.0078	16.3914	20.7048	22.5044	18.5825	16.5055	10.1305	21.9261	24.9291	21.9755	17.5421	27.0466	23.3121	12.8627	27.8568	32.134	26.674	23.5315	33.7882	24.1687	22.0066	17.6982	20.9941	18.2637	19.2527	33.2286	39.7102	25.9806	19.3069	26.4629	38.6334	23.5016	30.4812	16.5171	18.7814	18.452	25.518	26.7929	36.306	13.3493	30.0642	25.3824
691	14.9438	19.9415	15.5338	12.015	7.0637	17.812	16.5371	20.0599	16.4257	20.7472	22.4854	18.5691	16.5787	10.1854	21.9418	24.9753	22.0422	17.5074	27.0808	23.3609	12.969	27.9052	32.1902	26.6244	23.7025	33.9463	24.2968	22.1396	17.7957	21.0956	18.338	19.2334	33.3699	39.7634	26.1017	19.3278	26.5231	38.75	23.5316	30.4696	16.5048	18.8413	18.4451	25.5898	26.928	36.3514	13.4704	30.1397	25.375
692	14.8943	20.0152	15.5638	11.9896	7.0828	17.8548	16.4875	20.0385	16.4502	20.6883	22.4761	18.5937	16.5847	10.1695	21.8727	24.9405	22.0956	17.4971	27.0841	23.349	13.0349	28.0117	32.4119	26.607	23.7336	34.0447	24.3482	22.2436	17.7514	21.1676	18.3506	19.2621	33.5096	39.8037	26.1577	19.3124	26.5785	38.6968	23.5855	30.5194	16.5957	18.8452	18.5	25.591	26.9588	36.5462	13.5199	30.1589	25.3542
693	15.0106	20.2493	15.6976	12.2081	7.2005	17.8782	16.491	20.1372	16.5398	20.7054	22.5947	18.5861	16.6336	10.1933	21.8466	25.0367	22.0888	17.5612	27.2566	23.3325	13.104	28.2862	32.6604	26.757	23.8282	34.1693	24.4021	22.4058	17.8178	21.2246	18.3823	19.3649	33.7262	39.8568	26.1953	19.2855	26.7056	38.8688	23.7076	30.6444	16.6363	18.8593	18.5523	25.622	27.0909	36.8393	13.5653	30.234	25.4593
694	15.075	20.4181	15.8489	12.2258	7.2307	17.8718	16.4255	20.1045	16.5601	20.6952	22.5672	18.4832	16.5052	10.1257	21.7918	25.0261	21.9998	17.5044	27.2475	23.2599	13.1192	28.5308	32.8667	27.0338	23.9899	34.3454	24.4282	22.5544	17.7848	21.3075	18.3903	19.3606	33.8493	39.9278	26.1281	19.3299	26.8574	38.9736	23.7139	30.7609	16.5035	18.7864	18.4598	25.601	27.2397	37.0593	13.5461	30.3721	25.6414
695	15.0005	20.5535	15.8004	12.2154	7.1321	17.8692	16.3503	20.0867	16.5536	20.6345	22.4145	18.4681	16.3697	10.0647	21.7559	24.9611	21.9886	17.4119	27.1761	23.1717	13.0745	28.6626	32.9426	27.109	24.0905	34.3175	24.4996	22.6301	17.8078	21.3866	18.3969	19.3934	33.9355	39.9797	26.0378	19.2414	26.8641	39.0706	23.6019	30.8014	16.4688	18.7488	18.3953	25.6236	27.3149	37.1712	13.5757	30.3536	25.6877
696	15.0619	20.6017	15.7649	12.277	7.1696	17.8973	16.4298	20.1847	16.6077	20.6243	22.3741	18.5653	16.3486	10.1443	21.7359	25.004	21.9882	17.4062	27.1486	23.2052	13.0891	28.6826	33.0122	27.1956	24.0833	34.3969	24.6855	22.7139	17.8638	21.4349	18.4035	19.3998	34.1989	39.9996	26.0544	19.2966	26.8572	39.1953	23.7092	30.9516	16.5616	18.7596	18.3585	25.6407	27.3121	37.2257	13.5253	30.2629	25.7459
697	15.1135	20.7022	15.7204	12.2337	7.2682	17.8721	16.5762	20.3043	16.7207	20.6093	22.4365	18.6081	16.4294	10.2665	21.7835	25.1281	22.0849	17.4824	27.1817	23.2917	13.0657	28.718	33.069	27.2452	24.0964	34.5814	24.8595	22.7324	18.06	21.5835	18.5198	19.4718	34.4698	40.1857	26.1754	19.3781	26.9963	39.3698	23.8413	31.1456	16.6119	18.7934	18.4002	25.6764	27.3939	37.4254	13.4773	30.1628	25.803
698	15.1889	20.8237	15.8143	12.2685	7.3709	17.8133	16.6037	20.3607	16.6878	20.6723	22.5145	18.6436	16.4179	10.2682	21.8189	25.2168	22.1172	17.5619	27.1134	23.2813	13.2176	28.9179	33.2611	27.4428	24.2956	34.5928	24.9933	22.7971	18.0619	21.6751	18.5259	19.501	34.6843	40.2669	26.2493	19.4221	27.1015	39.4994	23.7882	31.253	16.5601	18.8056	18.3937	25.708	27.4751	37.478	13.5605	30.2022	25.8957
699	15.2377	20.9782	15.9499	12.4261	7.546	17.8298	16.6911	20.4441	16.6885	20.7411	22.5422	18.698	16.4104	10.2276	21.8672	25.2749	22.1297	17.5666	27.2589	23.243	13.4208	29.1318	33.5751	27.7363	24.4693	34.6368	25.1128	22.8697	18.0936	21.7627	18.5396	19.6105	34.8958	40.2728	26.3956	19.3532	27.0972	39.6845	23.7792	31.3565	16.5015	18.8282	18.3967	25.7703	27.5832	37.3008	13.6378	30.252	26.0356
700	15.3028	21.0904	16.0819	12.5508	7.6496	17.7727	16.6293	20.4825	16.7064	20.7693	22.5529	18.749	16.3712	10.256	21.8853	25.2891	22.1127	17.5283	27.3538	23.2116	13.5093	29.1179	33.6712	27.8581	24.5672	34.7181	25.1953	22.9387	18.0819	21.9199	18.5149	19.5654	35.1074	40.2769	26.4321	19.2815	27.1512	39.7264	23.8051	31.4239	16.5547	18.8293	18.3255	25.7701	27.6136	37.2005	13.6469	30.2883	26.1335
701	15.4539	21.1908	16.2241	12.6363	7.7024	17.8261	16.5796	20.4597	16.765	20.6861	22.5533	18.7189	16.4502	10.3605	21.8143	25.1381	22.129	17.4942	27.3167	23.1369	13.5469	29.0906	33.827	27.9958	24.5987	34.8419	25.3231	22.9025	18.1216	22.1255	18.5415	19.5173	35.3752	40.3181	26.4185	19.2247	27.21	39.7858	23.8366	31.4539	16.5826	18.7825	18.3347	25.7925	27.6238	37.1901	13.6201	30.3455	26.3212
702	15.5578	21.3562	16.1915	12.6977	7.7897	17.8551	16.702	20.5644	16.912	20.7843	22.6041	18.8379	16.591	10.4353	21.8397	25.2396	22.2113	17.573	27.2777	23.2436	13.5882	29.2819	34.0657	28.1439	24.754	35.0169	25.5456	22.9477	18.2591	22.3052	18.6334	19.5316	35.4682	40.5515	26.4832	19.3098	27.3619	39.9378	23.9015	31.69	16.6363	18.9133	18.3088	25.885	27.7678	37.1772	13.6313	30.4485	26.3624
703	15.5925	21.5119	16.3018	12.7851	7.8316	17.9031	16.8283	20.6741	17.0168	20.972	22.7256	18.8953	16.5916	10.4639	21.9144	25.3677	22.3391	17.7424	27.3562	23.3002	13.6914	29.634	34.2477	28.3378	24.9388	35.2516	25.6437	23.1494	18.3638	22.4192	18.7644	19.5251	35.6891	40.6765	26.5841	19.4231	27.5556	40.1412	23.8713	31.7801	16.603	18.9034	18.3343	25.9532	27.6496	37.038	13.6541	30.5927	26.2586
704	15.5731	21.6525	16.3119	12.8315	7.8917	17.9364	16.854	20.8026	16.9981	20.8899	22.8115	18.9656	16.6746	10.5075	21.9247	25.3858	22.3778	17.7675	27.3553	23.3166	13.7446	29.6946	34.4398	28.5037	25.0498	35.4556	25.7691	23.268	18.4999	22.5593	18.8296	19.5287	35.8942	40.8947	26.6348	19.5298	27.5578	40.2689	23.9028	31.8518	16.5805	18.7998	18.3572	25.9118	27.5916	36.939	13.7586	30.5826	26.1555
705	15.5944	21.7181	16.2935	12.8831	7.9644	17.8732	16.7461	20.8553	16.9276	20.8607	22.8212	18.9223	16.6257	10.4428	21.9092	25.3126	22.3499	17.5829	27.3438	23.3318	13.7789	29.694	34.6571	28.6093	25.1315	35.6556	25.9353	23.3001	18.5467	22.6568	18.8342	19.5019	35.9916	40.853	26.649	19.4716	27.4387	40.1364	23.8123	31.8571	16.6368	18.9693	18.5248	25.9614	27.6379	36.9895	13.8467	30.7105	26.2215
706	15.8028	21.9483	16.5854	13.1062	8.1545	17.9238	16.8776	20.998	17.0102	20.9667	22.9056	18.9785	16.6348	10.4826	22.0226	25.2946	22.4464	17.6007	27.3296	23.4003	13.9523	29.8273	34.9581	28.8146	25.2798	35.9461	26.2004	23.5306	18.587	22.7264	18.9236	19.6233	36.2912	41.0563	26.7632	19.4482	27.522	40.2671	23.8068	31.92	16.6747	18.964	18.4355	26.0969	27.7373	37.1552	13.9778	30.8422	26.3753
707	15.8394	21.9693	16.6731	13.1098	8.2007	17.9112	17.0222	21.0702	17.1761	21.0327	22.9357	19.1355	16.7593	10.5739	22.085	25.3793	22.4977	17.659	27.4143	23.4014	13.968	29.886	34.9341	28.9298	25.3567	36.1004	26.3822	23.7002	18.6374	22.968	18.9481	19.7067	36.651	41.281	26.8783	19.5464	27.5963	40.499	23.8424	31.9889	16.5584	18.7561	18.2153	26.0839	27.7369	37.2552	13.964	30.7996	26.3795
708	16.0739	22.0789	16.7631	13.2943	8.4077	17.9537	17.1352	21.1539	17.3173	21.0703	22.9525	19.4087	16.9403	10.77	22.1566	25.4686	22.4932	17.7081	27.4703	23.4743	14.1667	30.128	35.2505	29.175	25.5874	36.196	26.5312	23.8327	18.7188	23.216	19.101	19.852	36.8335	41.3834	27.0335	19.7347	27.5827	40.7439	23.9342	32.0934	16.5788	18.6363	18.1678	26.1164	27.8765	37.3458	14.0921	30.8352	26.5626
709	15.9189	21.9264	16.6291	13.2399	8.3743	17.8593	17.0029	20.9876	17.3021	20.9871	22.894	19.304	16.8899	10.6955	22.1358	25.2643	22.3657	17.6453	27.4803	23.4145	14.2084	30.0289	35.2321	29.1079	25.431	36.216	26.6258	23.8166	18.6746	23.1801	19.102	19.7544	36.8962	41.2635	27.0142	19.6532	27.4651	40.6918	23.8974	31.8688	16.7492	18.7891	18.2108	25.9497	27.7284	37.121	14.0335	30.6443	26.385
710	15.8279	22.0285	16.7256	13.2504	8.3709	17.9578	17.0766	20.9375	17.2345	21.0198	22.8984	19.1755	16.9799	10.7126	22.209	25.2831	22.4495	17.6663	27.4666	23.4131	14.3122	30.075	35.3029	29.0453	25.5023	36.2925	26.7865	24.019	18.6863	23.2529	19.1365	19.7732	37.134	41.2654	27.1034	19.5995	27.4222	40.6736	23.9176	31.7872	16.8789	18.8649	18.2644	26.023	27.6124	37.1308	14.1237	30.5868	26.3904
711	15.7972	22.2124	16.8103	13.3998	8.455	18.1568	17.2741	21.0735	17.4338	21.1574	23.0878	19.274	17.1862	10.9209	22.4277	25.417	22.5968	17.7397	27.4271	23.4304	14.3715	30.259	35.4822	29.1484	25.7218	36.5081	26.9725	24.111	18.8415	23.3259	19.3335	19.7963	37.3667	41.33	27.295	19.7914	27.6604	40.7137	24.065	31.9264	16.8544	18.8086	18.2861	26.1972	27.716	37.2613	14.383	30.7395	26.5148
712	16.0506	22.3559	16.8447	13.6388	8.6018	18.2529	17.2574	21.144	17.4645	21.1811	23.2293	19.3854	17.3713	11.053	22.5115	25.4946	22.6141	17.8285	27.4597	23.4377	14.4829	30.4908	35.5868	29.2198	25.8381	36.7023	27.0567	24.0946	19.0384	23.4463	19.4306	19.8692	37.432	41.3223	27.4934	19.8651	27.7289	40.8219	24.1196	31.9922	16.7445	18.7497	18.3898	26.2017	27.8059	37.2789	14.557	30.6485	26.6862
713	16.2856	22.5195	16.982	13.7236	8.7441	18.3277	17.2767	21.2048	17.5012	21.1683	23.2921	19.5516	17.551	11.1107	22.5004	25.6453	22.6913	17.968	27.5865	23.6359	14.5943	30.6785	35.8397	29.2715	26.0059	36.8307	27.2456	24.2339	19.2557	23.598	19.5969	19.9664	37.5952	41.4168	27.6063	19.9118	27.7284	41.0084	24.2474	32.046	16.714	18.8402	18.435	26.2614	27.7558	37.1557	14.5271	30.5839	26.7364
714	16.3671	22.6113	17.1498	13.7874	8.8296	18.4244	17.2645	21.1099	17.5259	21.1334	23.3563	19.6545	17.6568	11.2345	22.499	25.7415	22.7672	18.0912	27.619	23.6384	14.729	30.6437	36.0316	29.205	26.2131	36.991	27.3968	24.3641	19.3836	23.7729	19.6932	20.0087	37.8079	41.5655	27.7526	19.9556	27.7672	41.0539	24.3918	32.048	16.7558	18.8443	18.3563	26.3947	27.7475	37.1489	14.4509	30.5566	26.9033
715	16.4611	22.7535	17.2321	13.9614	8.9026	18.4305	17.2568	21.0275	17.6738	21.1022	23.3162	19.7517	17.4821	11.3044	22.5461	25.7243	22.7635	18.0955	27.6809	23.5897	14.9229	30.6108	36.1069	29.2585	26.3361	37.0792	27.4219	24.2955	19.3996	23.7544	19.8131	20.0351	37.8123	41.5559	27.7906	19.9232	27.8505	41.154	24.4843	31.9428	16.7315	18.9154	18.4115	26.3884	27.9167	37.1605	14.584	30.5807	27.1192
716	16.4364	22.8095	17.1811	14.0149	9.0882	18.5281	17.2175	21.0588	17.6861	21.0879	23.3793	19.8302	17.4787	11.3628	22.594	25.6079	22.7186	18.032	27.7523	23.6021	15.0881	30.7325	36.0498	29.4547	26.4051	37.2472	27.4311	24.4187	19.484	23.7382	19.7345	20.0821	37.8296	41.3071	27.8664	19.8856	27.7484	40.9827	24.467	31.9126	16.6278	18.9684	18.4465	26.3737	27.8569	37.1087	14.8184	30.3667	27.1555
717	16.5077	23.0307	17.2694	14.1304	9.2799	18.6922	17.3115	21.0011	17.8424	21.237	23.5789	20.0326	17.7146	11.5367	22.7793	25.7403	22.8755	18.1698	27.7993	23.718	15.1311	30.8386	36.1605	29.5054	26.4465	37.4233	27.5843	24.6976	19.7006	23.947	19.9242	20.2687	38.0085	41.3613	28.0463	19.9689	27.8318	40.9234	24.5547	32.0977	16.623	18.981	18.5823	26.3372	27.866	37.0344	14.9582	30.2386	27.1392
718	16.7726	23.211	17.4221	14.303	9.4214	18.8551	17.3972	20.9561	17.988	21.2162	23.6278	20.1323	17.7234	11.6108	22.8231	25.8308	22.8928	18.3109	27.7866	23.8598	15.1544	31.1299	36.1968	29.6273	26.6131	37.4181	27.5463	24.8073	19.6891	24.1034	20.0652	20.3227	38.2037	41.4913	28.1751	19.9905	27.8008	40.9936	24.6235	32.2225	16.708	18.8536	18.58	26.4532	27.9023	36.9136	14.8973	30.3679	27.2121
719	16.8329	23.2534	17.5573	14.396	9.508	18.7989	17.2644	20.8719	17.8616	21.0896	23.4362	20.04	17.5471	11.6081	22.7142	25.7619	22.7884	18.2631	27.6897	23.7882	15.289	31.2387	36.3666	29.7464	26.6251	37.3027	27.5032	24.8637	19.6691	23.9752	20.0337	20.1413	38.1959	41.403	28.086	19.8158	27.7266	40.8915	24.4294	32.1652	16.7041	18.8578	18.5076	26.4432	27.8451	36.8876	14.923	30.4908	27.2636
720	16.9037	23.3491	17.799	14.628	9.861	18.7805	17.3376	20.9263	17.8704	21.1378	23.5491	20.2527	17.5257	11.7402	22.7269	25.7989	22.8167	18.2178	27.7119	23.722	15.4924	31.302	36.3315	29.9514	26.6388	37.3102	27.5456	24.9015	19.8283	23.9575	20.0996	20.1677	38.2632	41.4647	28.07	19.7689	27.9021	40.7421	24.4479	32.2335	16.6814	18.9117	18.6453	26.3954	27.9043	36.928	15.0218	30.5141	27.312
721	17.0215	23.6117	17.9335	14.7694	10.0175	18.7796	17.2698	20.9649	17.9182	21.2046	23.6325	20.3739	17.5866	11.8327	22.8056	25.8663	22.885	18.206	27.6149	23.8412	15.6866	31.3383	36.4955	30.2576	26.7973	37.2844	27.4185	24.8889	19.8391	24.0392	20.2076	20.2636	38.3815	41.5426	28.1586	19.8864	27.8316	40.6884	24.5961	32.1354	16.5008	18.9255	18.6092	26.3129	27.8337	36.9284	15.1423	30.3934	27.1924
722	17.192	23.7169	18.0337	14.9369	10.215	18.7004	17.1589	20.782	17.8327	21.1996	23.4941	20.1915	17.4559	11.8336	22.7316	25.776	22.9542	18.0741	27.5368	23.7157	15.8409	31.4192	36.5429	30.3472	26.9309	37.1984	27.1994	24.7786	19.7337	24.0361	20.0918	20.1592	38.2465	41.3539	28.0638	19.8541	27.7435	40.5622	24.5245	31.9869	16.6323	19.0957	18.7042	26.279	27.7066	36.822	15.2291	30.2764	27.1486
723	17.2763	23.801	18.162	15.1436	10.4344	18.784	17.3101	20.8492	17.8746	21.2347	23.5633	20.4078	17.5595	12.0183	22.8773	25.8711	22.9668	18.237	27.6525	23.8217	16.0541	31.7443	36.6315	30.3365	26.8768	37.2242	27.2513	24.8649	19.7332	24.1679	20.0271	20.3459	38.1834	41.3408	28.2127	19.9603	27.7161	40.6001	24.5072	31.964	16.7499	19.1155	18.95	26.1348	27.6434	36.6881	15.2667	30.245	27.2781
724	17.3107	23.72	18.1418	15.2511	10.4977	18.9109	17.4341	21.1375	17.9286	21.2514	23.5148	20.6106	17.726	12.122	22.894	25.8858	22.9543	18.3371	27.7799	23.7501	16.2039	31.7882	36.6651	30.2769	26.8001	37.1398	27.1872	25.0031	19.8062	24.0187	20.0141	20.3864	38.1878	41.2527	28.1924	20.0054	27.8002	40.5358	24.5126	32.1453	16.8584	18.9783	18.9098	25.9815	27.5829	36.6231	15.2202	30.2673	26.995
725	17.4955	23.8245	18.211	15.492	10.5477	18.9715	17.4879	21.1234	17.9987	21.3065	23.4651	20.6468	17.9199	12.3195	22.9325	25.7579	22.9624	18.4388	27.8292	23.814	16.3591	31.9126	36.5884	30.4195	26.9837	37.3276	27.0361	25.1092	19.9645	24.0838	20.0774	20.3971	38.2559	41.3074	28.24	20.2134	27.8248	40.3369	24.5947	32.1712	16.6969	18.8725	18.5827	25.8199	27.4494	36.5498	15.3255	30.1728	26.9077
726	17.7387	23.9482	18.251	15.6916	10.913	19.0871	17.4797	21.105	18.1239	21.2539	23.5629	20.6972	17.8865	12.3558	22.9838	25.702	22.8865	18.478	27.7667	23.8948	16.5487	32.0264	36.4824	30.6073	27.1638	37.2363	27.0032	25.1986	20.1435	24.1333	20.0666	20.3664	38.1172	41.2702	28.2213	20.2038	27.6984	40.1618	24.5112	32.0549	16.5589	18.7915	18.404	25.7391	27.4979	36.7165	15.5644	30.0206	27.2115
727	17.6756	24.0768	18.4044	15.8033	11.1883	18.9223	17.4776	21.0208	18.115	21.1405	23.4125	20.5564	17.6814	12.2312	22.7822	25.501	22.6957	18.3132	27.4402	23.5779	16.6811	32.0797	36.4796	30.4811	27.0006	36.8719	26.9801	25.1312	20.0325	24.0189	20.0062	20.225	37.9031	40.9268	28.1052	20.0386	27.6046	39.8265	24.3396	31.8148	16.6811	18.7957	18.5763	25.741	27.5456	36.6651	15.7763	29.8785	27.3181
728	17.7106	24.1769	18.6215	15.9119	11.2542	18.8897	17.4562	21.0482	18.2618	20.9732	23.3389	20.4998	17.8236	12.3834	22.8085	25.5152	22.7073	18.2949	27.3616	23.5077	16.6592	32.0157	36.451	30.4621	27.0587	36.8871	27.0131	25.3131	20.0292	23.9594	20.1578	20.3523	37.983	41.1597	28.1501	20.0499	27.5808	39.7005	24.4427	31.8575	16.7211	18.7053	18.4784	25.6865	27.4045	36.4238	15.8222	29.75	27.1861
729	17.8325	24.0941	18.5505	15.9564	11.2079	18.9284	17.6322	21.221	18.3352	20.944	23.404	20.6143	18.0762	12.6069	23.0926	25.6698	22.7399	18.3387	27.3779	23.6235	16.7158	31.9013	36.3626	30.4447	27.0576	36.8741	27.0828	25.4214	20.0667	24.0135	20.3053	20.5317	38.0265	41.2293	28.2728	20.1455	27.6537	39.5959	24.3768	31.9434	16.8525	18.7178	18.4355	25.749	27.0587	36.2889	15.6511	29.6065	27.2318
730	17.8522	24.109	18.6843	16.0514	11.2032	19.1397	17.8989	21.4224	18.414	21.0949	23.4907	20.7261	18.3232	12.7653	23.3242	25.6427	22.9053	18.4743	27.5406	23.7489	16.8185	31.8294	36.5317	30.4602	27.1587	36.7835	27.0814	25.5005	20.1217	24.1092	20.3418	20.6798	38.0131	41.1647	28.4592	20.4099	27.6843	39.4559	24.4005	31.8849	16.961	19.0477	18.6571	25.5583	27.1528	36.3144	15.7278	29.5437	27.176
731	17.9588	24.2745	18.8171	16.2164	11.4094	19.252	17.8581	21.4199	18.2903	21.0329	23.5041	20.7141	18.3106	12.7301	23.2846	25.5448	22.9951	18.4664	27.4636	23.64	17.0165	32.065	36.6812	30.6729	27.3418	36.6879	27.079	25.5359	20.2383	24.0967	20.2041	20.5273	37.9421	41.0094	28.4768	20.3993	27.613	39.2763	24.2595	31.6836	16.671	18.9917	18.673	25.7656	27.3236	36.3581	16.0434	29.5464	27.3095
732	17.9229	24.1987	18.7215	16.1719	11.4615	19.0514	17.7553	21.3329	18.2783	20.9335	23.234	20.5784	18.1849	12.6565	23.0622	25.423	22.8073	18.3231	27.158	23.3877	17.0785	32.0941	36.589	30.4611	27.2154	36.5404	27.1199	25.3601	20.2863	23.8881	20.1328	20.4271	37.924	40.7992	28.2416	20.2119	27.4438	39.1143	24.1925	31.5477	16.7051	18.9682	18.6968	25.8222	27.1864	36.2556	16.0348	29.6268	27.1409
733	17.7039	23.9514	18.5539	16.0835	11.5191	19.0762	17.8699	21.6245	18.3344	20.9998	23.3566	20.6261	18.3201	12.7205	23.0917	25.5774	22.8546	18.3531	27.3884	23.4256	16.9756	31.8802	36.3089	30.3096	27.1054	36.6081	27.3192	25.3964	20.2841	23.9414	20.3188	20.4829	37.9535	40.8548	28.3824	20.3046	27.5946	39.2002	24.3161	31.6362	16.8491	18.8598	18.7175	25.6896	27.1199	36.1555	16.0022	29.5492	26.9919
734	17.8733	23.9984	18.5634	16.2241	11.6196	19.3853	18.1364	21.9894	18.47	21.1885	23.5978	20.6388	18.5084	12.9698	23.3636	25.8827	23.0347	18.5951	27.6128	23.6115	17.068	31.829	36.2231	30.547	27.0916	36.7763	27.5645	25.4555	20.3661	24.1044	20.5857	20.7485	37.9395	40.9406	28.6768	20.3665	27.6804	39.3149	24.5001	31.7703	16.9424	18.7032	18.7527	25.7818	27.1096	36.2556	16.2152	29.368	26.9393
735	17.7584	23.9761	18.5042	16.2859	11.5295	19.4019	18.1814	21.9064	18.5677	21.1429	23.6205	20.6128	18.5522	13.0914	23.3798	25.8467	23.0841	18.6044	27.5283	23.6379	17.0296	31.6482	36.0608	30.3839	26.9587	36.6649	27.5389	25.5108	20.4215	24.087	20.5994	20.9737	37.8532	40.8721	28.6534	20.3211	27.4895	39.2724	24.3731	31.7015	16.737	18.6747	18.5901	25.8312	27.1197	36.1141	16.0818	29.3107	26.8319
736	17.8331	24.2321	18.6037	16.3008	11.6035	19.2633	18.1915	21.8758	18.6063	21.0554	23.4455	20.4832	18.4112	13.0719	23.3027	25.7005	22.954	18.6599	27.6206	23.5688	17.0932	31.5465	36.224	30.3779	26.8856	36.455	27.4172	25.6636	20.3655	23.9758	20.5349	20.9455	37.8888	40.8451	28.5512	20.2904	27.4153	39.2067	24.1737	31.5878	16.8588	18.8946	18.7987	25.6522	26.9861	36.0203	16.0323	29.2437	26.96
737	17.9867	24.4133	19.0347	16.6818	11.8731	19.1663	18.2518	22.181	18.7727	21.1682	23.5049	20.6024	18.4923	13.0364	23.3267	25.5939	22.8672	18.8369	27.6782	23.7613	17.0713	31.8674	36.4351	30.5488	27.1749	36.3961	27.4022	25.8971	20.4975	24.0418	20.7079	20.8446	37.9733	41.0911	28.5528	20.3247	27.6132	39.2215	24.2727	31.8443	16.7538	19.0068	18.8112	25.6488	26.8296	36.2696	16.0102	28.8977	26.949
738	18.3405	24.6929	19.4528	16.9237	12.1576	19.2112	18.2354	22.2687	18.6939	21.0306	23.3902	20.8501	18.5101	13.0812	23.4997	25.635	22.9286	18.89	27.6052	23.7918	17.4311	32.3088	36.6033	30.8275	27.5532	36.3867	27.4157	25.9246	20.6065	24.07	20.7003	20.8685	37.9499	41.2131	28.634	20.3119	27.7407	39.1246	24.4235	31.9517	16.6104	18.9363	18.7322	25.7287	26.8607	36.4925	16.2215	28.863	26.8708
739	18.5464	24.7252	19.4179	17.0171	12.2793	19.3031	18.2254	22.0203	18.6976	20.9492	23.5328	21.0167	18.5166	13.0537	23.4874	25.6121	22.8609	18.854	27.4612	23.6229	17.7005	32.4884	36.5963	30.917	27.7818	36.3995	27.4184	25.8656	20.4607	23.9333	20.6631	20.6643	37.6893	41.0612	28.6285	20.4286	27.5301	38.9653	24.4032	31.8837	16.5543	18.7448	18.4516	25.6971	26.969	36.2771	16.3269	29.0561	26.9921
740	18.5686	24.8177	19.1325	17.1245	12.3934	19.194	18.1083	21.8416	18.4749	20.8501	23.4189	20.9883	18.5508	13.086	23.4274	25.5195	22.687	18.694	27.2481	23.6434	17.8981	32.3643	36.6154	31.1142	27.7216	36.217	27.3986	25.7398	20.2739	23.7747	20.5506	20.5497	37.5545	40.7241	28.335	20.3612	27.3723	38.8494	24.1864	31.7343	16.538	18.6503	18.4758	25.5116	26.8459	36.1403	16.2213	29.0039	27.1331
741	18.9179	25.0331	19.5278	17.3244	12.8165	19.2871	18.2963	22.1116	18.7481	20.9679	23.5384	21.209	18.866	13.3512	23.6	25.5405	22.8537	18.8901	27.465	23.9062	18.3399	32.38	36.8315	31.3661	27.7592	36.2558	27.4894	25.8053	20.5307	23.6824	20.7885	20.7412	37.8688	40.8754	28.5568	20.3566	27.5674	39.0204	24.5143	31.8281	16.7496	18.7245	18.7564	25.5583	26.7002	36.0495	16.173	29.0564	27.1235
742	19.0748	25.1932	19.8855	17.5765	13.0098	19.4599	18.4523	22.3273	18.8786	21.0496	23.7537	21.3498	19.09	13.4133	23.8136	25.8848	23.3165	18.9281	27.6103	24.0432	18.4388	32.4595	36.9853	31.3382	27.9705	36.4104	27.5192	25.9644	20.7305	23.8495	21.1627	20.9589	38.1329	41.0887	28.8475	20.4936	27.8629	39.0515	24.8615	31.6257	16.6641	18.7352	18.8214	25.7054	26.5755	35.9778	16.5067	29.1257	27.2772
743	19.2744	25.5702	20.0615	17.8267	13.1549	20.1088	18.6703	22.7315	19.0536	21.2313	24.0368	21.7854	19.2404	13.783	23.9602	26.1273	23.6852	19.1143	28.113	24.2888	18.6658	32.6692	37.2995	31.5475	28.253	36.6208	27.6377	26.3247	21.1515	24.1784	21.3255	21.1903	38.3038	41.3083	29.0916	21.0328	27.931	39.2831	25.082	31.9291	16.9548	18.9009	18.9494	25.6506	26.7125	35.7843	16.462	29.0528	27.3809
744	19.3207	25.7314	20.1441	18.053	13.2623	20.1676	18.6939	22.7053	19.0371	21.2908	23.9598	21.8606	19.2696	14.0618	23.8953	25.7969	23.358	18.9168	27.9007	24.1192	18.788	32.7042	37.4882	31.7329	28.3695	36.5412	27.8346	26.1917	20.9833	24.1914	21.367	21.1896	38.2584	41.1796	28.9678	20.7122	27.6838	39.0839	24.9976	31.8244	17.1587	18.9333	18.7338	25.7131	26.7768	35.6986	16.3117	29.2639	27.4203
745	19.1798	25.7026	20.2578	18.0801	13.3428	20.0819	18.6112	22.4645	18.8335	21.2791	23.7965	21.7994	19.0067	14.1536	23.7472	25.6626	23.2125	18.7894	27.7033	23.7505	18.941	32.8141	37.6041	31.9116	28.6284	36.428	27.8805	26.1534	21.1033	24.2369	21.0992	21.1794	38.4136	41.2871	28.9504	20.4802	27.5413	39.0684	24.8785	31.7174	17.105	19.063	18.8331	25.5876	26.7856	35.6935	16.3179	29.2623	27.5363
746	19.3035	25.3106	20.1914	18.0501	13.2765	19.8689	18.2483	22.1573	18.7875	20.8393	23.416	21.367	18.7602	13.5513	23.4748	25.6399	23.1436	18.8144	27.5338	23.6793	18.495	32.4717	37.3801	31.7363	28.3545	36.0657	27.7941	25.7531	20.9344	23.9467	20.8504	20.9971	38.2133	41.0258	28.7676	20.4688	27.5049	39.0387	24.7471	31.4479	16.8042	18.9804	18.6654	25.4818	26.71	35.8321	16.7425	29.1553	27.6353
747	19.2788	25.4213	20.1352	18.0802	13.3511	19.8751	18.3383	22.3093	19	20.9488	23.3884	21.5199	18.903	13.6562	23.5659	25.9009	23.2477	18.883	27.4455	23.7985	18.539	32.455	37.3776	31.5264	28.2591	36.1683	27.5215	25.8963	21.1354	23.8431	21.1627	20.9771	38.2593	41.1503	28.9824	20.6465	27.7082	39.1489	24.8249	31.5646	16.7759	19.1326	18.6887	25.2646	26.7373	35.7416	16.6771	28.7867	27.7118
748	19.05	25.6331	20.2252	18.0868	13.412	19.7356	18.4667	22.2233	18.9977	21.1605	23.4313	21.5531	18.9801	13.5986	23.5754	25.9453	23.1425	18.9781	27.4879	23.9072	18.599	32.4503	37.3127	31.4703	28.2872	36.0872	27.5059	25.9747	21.3294	23.8377	21.2752	21.0179	38.3024	41.2467	29.0742	20.5853	27.59	39.1622	24.7704	31.6196	16.9824	18.8718	18.8303	25.3375	26.7127	35.5543	16.5287	28.3839	27.8053
749	19.2216	25.8246	20.4926	18.2906	13.5064	19.7854	18.6696	22.1843	18.9654	21.2324	23.6108	21.5536	18.952	13.6488	23.5121	26.0064	23.1528	19.1353	27.5704	23.8637	18.9373	32.6337	37.3949	31.8202	28.3211	36.1644	27.5635	26.2159	21.1845	23.9484	21.4846	21.1976	38.4116	41.325	29.1476	20.6282	27.6945	39.0027	24.9026	31.5664	17.0307	19.0188	18.9257	25.5035	26.7353	35.6765	16.4847	28.6001	28.0187
750	19.8216	26.3905	21.0387	18.7269	13.8963	19.8336	18.4478	21.9614	18.8568	20.9369	23.6449	21.5197	18.8386	13.6261	23.4161	25.8257	23.0571	19.0766	27.393	23.7469	19.3073	33.1215	37.8518	31.9626	28.6789	36.1314	27.3597	26.2343	21.1372	23.6637	21.4763	21.076	38.3596	41.0734	29.136	20.6132	27.6194	39.0352	24.8703	31.3441	16.7699	18.941	18.7484	25.6607	26.9407	35.7665	16.8015	28.8995	28.1918
[truncated: 38 more columns]
