# Supplementary material for: Molecular basis of wax-based color change and UV reflection in dragonflies
Source: eLife. 2019 Jan 15;8:e43045. doi: 10.7554/eLife.43045 (PMC6353593; doi:10.7554/eLife.43045)
Supplement: Figure 2—source data 3. [file elife-43045-fig2-data3.xlsx]

## Sheet: OalbistylumMature-OCEAN
	Male	Male	Male	Male	Male	Male	Male	Male	Male	Male	Male	Male	Male	Male	Male	Male	Female	Female	Female	Female	Female	Female	Female	Female	Female	Female	Female	Female	Female	Female	Female	Female	Female	Female	Female	Female
wavelength	M1D5	M2D5	M3D5	M4D5	M5D5	M6D5	M7D5	M8D5	M1V5	M2V5	M3V5	M4V5	M5V5	M6V5	M7V5	M8V5	F1D5	F2D5	F3D5	F4D5	F5D5	F6D5	F7D5	F8D5	F9D5	F10D5	F1V5	F2V5	F3V5	F4V5	F5V5	F6V5	F7V5	F8V5	F9V5	F10V5	male D5	male V5	female D5	female V5	male D5SD	male V5SD	female D5SD	femalseV5SD
300	60.291	61.711	52.752	69.799	50.229	42.08	41.508	46.008	23.956	23.555	25.624	21.468	14.494	9.752	16.46	10.862	4.207	5.31	2.166	2.688	1.895	5.203	7.574	3.916	4.751	2.286	13.651	13.243	34.557	18.964	28.225	10.682	17.741	15.643	10.048	14.719	53.0472	18.2714	3.9996	17.7473	10.136	6.20529	1.79519	7.84356
301	60.201	61.789	52.317	69.283	50.35	41.514	41.629	45.484	23.933	23.155	25.494	21.384	14.758	9.88	15.831	11.399	4.142	5.271	2.115	2.599	1.891	5.038	7.769	4.163	4.382	2.186	13.606	13.351	34.52	18.781	28.247	10.578	17.654	15.462	9.942	14.913	52.8209	18.2292	3.9556	17.7054	10.1361	6.02007	1.83563	7.85056
302	59.986	61.518	52.109	69.128	50.092	41.708	41.476	45.508	23.878	23.266	25.193	21.466	14.827	9.92	16.024	10.918	4.101	5.319	2.176	2.586	1.997	5.189	7.235	3.732	4.772	2.552	13.554	13.311	34.503	18.867	28.471	10.482	17.625	15.152	10.017	15.011	52.6906	18.1865	3.9659	17.6993	10.0456	6.03761	1.6905	7.89533
303	59.913	61.305	52.428	68.924	49.878	40.647	41.409	45.652	23.665	23.123	25.293	21.039	14.389	9.71	15.962	11.354	4.185	5.203	2.15	2.554	1.926	4.642	7.618	3.98	4.754	2.524	13.543	13.178	34.227	18.904	28.194	10.785	17.648	15.768	9.864	14.739	52.5195	18.0669	3.9536	17.685	10.1384	5.98583	1.74879	7.77578
304	60.219	61.386	52.461	68.681	49.887	41.467	41.408	45.479	23.563	23.096	25.221	21.248	14.442	9.527	15.745	11.302	4.083	5.271	2.173	2.665	1.862	5.058	7.2	3.887	4.535	2.46	13.438	13.229	34.262	18.502	28.014	10.304	17.321	15.538	9.961	14.657	52.6235	18.018	3.9194	17.5226	10.0081	6.02382	1.67593	7.80194
305	59.958	61.294	51.81	68.597	50.385	41.669	41.689	45.445	23.531	22.976	25.271	21.042	14.683	9.545	15.911	10.951	4.11	5.198	2.154	2.641	1.871	5.114	7.341	4.021	4.7	2.427	13.453	13.176	34.006	18.558	27.994	9.886	17.536	15.673	9.842	14.788	52.6059	17.9887	3.9577	17.4912	9.86256	6.02394	1.71868	7.78944
306	59.407	61.095	51.491	68.556	49.827	41.767	41.142	44.103	23.541	23.095	25.059	20.883	14.593	10.241	16.397	10.811	4.125	5.175	2.099	2.564	1.881	4.98	7.78	3.448	4.622	2.1	13.377	13.191	34.014	18.422	28.034	10.222	17.79	15.347	9.532	14.133	52.1735	18.0775	3.8774	17.4062	10.01	5.86534	1.8548	7.83525
307	59.281	60.902	51.773	68.136	49.508	41.132	40.684	44.488	23.514	22.824	25.189	21.096	14.155	9.619	15.627	10.632	3.946	5.261	2.079	2.56	1.914	4.506	7.55	3.962	4.222	2.396	13.37	13.173	33.838	18.317	27.709	10.151	17.382	15.372	9.646	13.972	51.988	17.832	3.8396	17.293	10.0106	6.09051	1.7299	7.74493
308	59.497	60.646	51.991	67.944	49.995	41.005	41.693	44.66	23.095	22.696	24.834	20.852	14.541	9.394	15.684	10.997	4.022	5.17	2.084	2.421	1.909	4.949	7.41	3.652	4.678	2.574	13.401	13.16	33.795	18.59	27.742	10.589	17.518	15.467	9.732	14.159	52.1789	17.7616	3.8869	17.4153	9.78288	5.8898	1.72952	7.6781
309	59.524	60.476	51.62	67.768	50.133	41.176	41.299	44.723	23.243	22.654	25.058	20.674	14.223	9.55	15.93	10.413	3.988	5.198	2.162	2.491	1.943	4.989	7.332	3.405	4.413	1.804	13.291	13.088	33.813	18.304	27.856	10.333	17.496	15.234	9.325	14.492	52.0899	17.7181	3.7725	17.3232	9.7488	6.01183	1.77112	7.76928
310	59.349	60.215	51.236	67.161	49.642	40.452	40.786	44.994	22.951	22.719	24.868	20.464	14.097	9.795	15.965	10.413	3.988	5.129	2.085	2.358	1.869	4.595	7.306	3.637	4.349	2.044	13.264	13.17	33.713	18.176	27.717	9.875	16.962	15.039	9.589	14.599	51.7294	17.659	3.736	17.2104	9.74754	5.89614	1.72709	7.73912
311	59.172	60.47	51.245	67.488	49.265	39.963	40.562	44.63	23.295	22.656	24.695	20.64	14.18	9.524	16.006	10.587	4.02	5.145	2.125	2.394	1.816	4.758	7.238	3.64	4.274	2.169	13.297	13.119	33.558	18.231	27.642	10.147	16.935	15.162	9.739	13.841	51.5994	17.6979	3.7579	17.1671	9.99898	5.92984	1.70641	7.67737
312	58.88	60.368	50.714	67.147	48.953	40.433	40.229	44.069	23.06	22.478	24.6	20.634	13.699	9.368	15.558	11.108	3.923	5.109	2.097	2.373	1.882	4.792	7.823	3.54	4.197	1.851	13.109	13.127	33.469	17.97	27.567	9.949	17.453	14.968	9.469	14.086	51.3491	17.5631	3.7587	17.1167	9.92537	5.86881	1.8714	7.69626
313	58.38	60.007	50.876	67.285	48.973	40.646	40.83	43.986	23.014	22.619	24.48	20.463	13.773	9.329	15.255	10.528	3.913	5.063	2.129	2.42	1.875	5.063	7.4	3.765	4.55	1.909	13.158	12.98	33.525	18.008	27.467	9.93	17.62	14.924	9.419	14.319	51.3729	17.4326	3.8087	17.135	9.73678	5.95671	1.78588	7.70085
314	58.613	60.213	50.823	66.806	50.155	39.895	40.843	43.604	23.171	22.454	24.54	20.271	13.982	9.476	15.581	10.682	3.905	5.054	2.144	2.417	1.788	4.642	7.548	3.794	4.505	2.274	13.106	13.012	33.387	18.122	27.395	9.48	17.469	15.1	9.787	14.152	51.369	17.5196	3.8071	17.101	9.80896	5.86598	1.75968	7.66908
315	58.578	59.95	50.767	66.569	49.567	40.303	40.602	44.01	22.837	22.247	24.646	20.552	13.679	9.191	15.473	10.817	3.885	5.1	2.102	2.441	1.849	4.58	7.084	3.701	4.353	2.567	13.049	13.124	33.322	18.146	27.36	9.444	16.851	15.178	9.552	14.28	51.2933	17.4303	3.7662	17.0306	9.65658	5.9012	1.61422	7.66653
316	58.493	59.669	50.489	66.912	48.885	40.205	40.247	43.15	22.889	22.371	24.359	20.502	14.529	9.115	15.618	10.36	3.97	5.06	2.052	2.431	1.754	4.722	7.276	3.732	4.14	2.108	13.101	13.038	33.278	18.013	27.348	9.8	17.673	14.421	9.506	13.926	51.0063	17.4679	3.7245	17.0104	9.87785	5.8855	1.71888	7.66328
317	58.346	59.289	50.302	66.417	49.072	39.393	40.077	42.983	22.57	22.257	24.373	20.435	13.898	9.338	15.411	10.278	3.89	4.989	2.114	2.356	1.795	5.111	7.013	3.99	4.44	2.242	13.04	13.029	33.135	17.996	27.34	9.956	16.582	15.047	9.277	13.91	50.7349	17.32	3.794	16.9312	9.87279	5.8559	1.67612	7.61905
318	58.227	59.674	50.779	65.949	49.39	39.305	39.743	43.048	22.656	22.096	24.487	20.364	13.766	9.302	15.393	10.392	3.822	5.008	2.095	2.326	1.792	5.041	7.451	3.782	4.375	2.291	13.12	12.963	33.246	17.83	27.444	9.632	16.844	14.571	9.1	13.88	50.7644	17.307	3.7983	16.863	9.85513	5.86202	1.76539	7.72599
319	57.991	59.041	50.222	66.245	48.665	38.992	39.917	44.592	22.653	22.111	24.44	20.17	13.797	9.642	15.086	10.595	3.847	4.997	2.116	2.271	1.782	5.184	6.959	3.498	4.351	2.23	12.996	12.899	33.058	17.786	27.088	10.21	17.428	14.429	9.314	13.205	50.7081	17.3117	3.7235	16.8413	9.70571	5.75438	1.67918	7.59545
320	58.062	59.222	50.628	65.212	47.368	38.307	39.115	43.255	22.781	22.095	24.328	20.283	13.349	8.746	15.122	10.259	3.774	4.986	2.147	2.454	1.857	5.06	6.683	3.345	4.159	2.263	12.91	12.883	32.974	17.679	27.297	9.584	16.62	14.84	9.432	13.602	50.1461	17.1204	3.6728	16.7821	9.92329	6.02574	1.56923	7.62663
321	57.57	58.79	50.099	65.333	48.562	39.351	39.892	42.958	22.605	22.155	24.111	20.152	13.514	9.178	15.135	10.693	3.798	4.944	2.077	2.271	1.695	4.759	7.195	3.558	4.089	2.202	12.883	12.929	32.893	17.742	27.055	10.008	16.981	14.976	8.911	13.937	50.3194	17.1929	3.6588	16.8315	9.53261	5.79145	1.69929	7.56658
322	57.663	58.098	49.61	64.51	47.905	38.695	39.271	41.617	22.176	22.034	23.934	20.043	13.431	9.167	15.084	10.18	3.792	4.964	2.144	2.288	1.748	4.495	7.203	3.441	4.095	2.2	12.808	12.951	32.88	17.476	26.906	9.858	16.829	14.316	9.149	13.391	49.6711	17.0061	3.637	16.6564	9.64887	5.77864	1.67225	7.5735
323	57.471	58.614	49.794	64.915	48.362	39.745	40.229	42.892	22.192	21.812	24.102	20.09	13.388	9.2	15.278	10.247	3.785	4.975	2.077	2.251	1.631	4.901	6.816	3.466	4.41	2.372	12.841	12.896	32.802	17.505	26.911	9.627	16.938	14.567	9.189	14.291	50.2527	17.0386	3.6684	16.7567	9.30322	5.7637	1.63679	7.53045
324	57.857	58.619	49.966	65.008	47.213	38.392	39.236	43.354	22.249	21.945	23.957	19.778	13.908	8.951	14.937	10.142	3.791	4.904	2.054	2.347	1.728	4.542	7.673	3.487	4.047	2.195	12.805	12.815	32.629	17.635	26.943	9.78	16.796	14.439	9.237	13.067	49.9556	16.9834	3.6768	16.6146	9.73793	5.77872	1.78903	7.53968
325	57.333	58.306	49.995	64.64	48.087	39.226	39.465	42.7	22.349	21.868	23.95	19.892	13.579	9.426	14.851	10.032	3.709	4.961	2.113	2.281	1.772	4.89	7.182	4.011	4.27	2.479	12.718	12.87	32.532	17.481	26.983	9.481	16.628	14.941	9.408	13.318	49.969	16.9934	3.7668	16.636	9.41958	5.74724	1.67491	7.50785
326	57.603	58.653	49.451	64.702	48.48	38.34	38.854	42.568	22.099	21.747	24.06	19.798	13.49	8.587	15.31	10.392	3.78	4.857	2.122	2.249	1.789	5.346	6.684	3.329	4.364	2.182	12.763	12.77	32.537	17.598	27.089	9.5	16.709	14.194	9.29	13.317	49.8314	16.9354	3.6702	16.5767	9.75878	5.80386	1.63571	7.56317
327	56.976	58.39	49.655	64.374	48.425	38.476	39.361	42.261	22.121	21.534	23.747	19.864	13.39	9.268	14.76	10.039	3.729	4.973	2.105	2.211	1.668	4.795	7.213	3.608	4.234	2.174	12.742	12.831	32.39	17.341	26.869	9.59	16.986	14.172	9.027	13.364	49.7398	16.8404	3.671	16.5312	9.51397	5.68948	1.72129	7.50832
328	57.159	57.997	49.157	64.118	48.134	37.825	38.763	41.932	21.906	21.646	23.698	19.71	13.625	8.827	15.032	9.772	3.68	4.813	2.127	2.196	1.729	4.24	6.959	3.631	3.969	2.35	12.657	12.829	32.396	17.251	26.579	9.279	16.698	14.379	8.893	13.738	49.3856	16.777	3.5694	16.4699	9.67536	5.75412	1.58121	7.49255
329	57.209	57.968	49.401	64.263	48.379	39.176	38.905	41.703	22.17	21.492	23.697	19.852	13.409	9.051	14.97	10.133	3.722	4.829	2.143	2.205	1.676	4.884	7.195	3.24	4.268	2.313	12.673	12.713	32.336	17.322	26.646	9.711	16.632	14.736	8.815	13.049	49.6255	16.8468	3.6475	16.4633	9.48574	5.69538	1.70223	7.48003
330	57.181	57.558	48.796	63.733	46.829	37.651	38.738	41.648	21.92	21.63	23.781	19.663	13.41	8.805	14.689	10.353	3.689	4.852	2.107	2.145	1.656	4.635	7.03	3.424	4.291	2.253	12.648	12.71	32.324	17.276	26.305	9.6	16.406	14.495	8.83	13.312	49.0168	16.7814	3.6082	16.3906	9.6373	5.70594	1.66196	7.43006
331	57.098	57.859	48.787	63.624	47.301	38.104	38.779	42.18	21.761	21.59	23.557	19.77	13.3	9.099	15.063	9.993	3.681	4.797	2.099	2.242	1.672	4.743	7.264	3.737	4.186	2.447	12.564	12.647	32.164	17.382	26.57	9.405	16.237	14.209	8.889	13.199	49.2165	16.7666	3.6868	16.3266	9.4882	5.64336	1.68659	7.46891
332	57.008	57.778	49.019	63.563	46.378	38.286	38.221	42.478	21.917	21.272	23.687	19.659	12.954	8.549	14.466	10.188	3.646	4.791	2.056	2.099	1.755	4.381	7.413	3.269	4.161	1.966	12.588	12.604	32.231	17.401	26.59	9.413	17.332	14.346	8.905	13.112	49.0914	16.5865	3.5537	16.4522	9.51378	5.77506	1.75383	7.49269
333	56.849	57.572	48.71	63.258	47.103	37.167	38.428	41.387	21.988	21.405	23.686	19.573	12.969	8.773	14.328	9.68	3.62	4.713	2.12	2.187	1.692	4.691	7.09	3.091	4.133	2.117	12.52	12.608	31.936	17.06	26.616	9.51	16.281	13.983	9.103	13.372	48.8092	16.5503	3.5454	16.2989	9.64745	5.83883	1.67165	7.38801
334	56.943	57.427	48.86	63.383	46.812	37.73	38.475	41.516	21.951	21.32	23.47	19.441	13.267	8.392	14.384	9.667	3.682	4.773	2.091	2.213	1.665	4.921	7.085	3.502	4.092	2.219	12.504	12.715	32.107	17.063	26.547	9.409	16.174	13.929	9.028	12.773	48.8933	16.4865	3.6243	16.2249	9.55802	5.82524	1.67899	7.46172
335	56.319	57.388	48.195	62.985	46.425	37.052	38.878	41.546	21.688	21.396	23.263	19.337	13.113	8.724	14.807	9.651	3.549	4.736	2.115	2.106	1.626	4.481	7.136	3.202	4.203	2.166	12.443	12.585	31.986	17.029	26.417	9.374	16.422	14.623	8.651	13.354	48.5985	16.4974	3.532	16.2884	9.45869	5.6869	1.68122	7.42065
336	56.672	57.195	48.396	62.998	46.572	37.365	37.61	41.796	21.561	21.309	23.489	19.575	12.574	8.338	14.424	9.445	3.616	4.719	2.067	2.145	1.727	4.846	7.025	3.751	4.288	2.606	12.415	12.714	31.799	16.914	26.062	9.335	16.577	14.151	8.951	13.064	48.5755	16.3394	3.679	16.1982	9.59005	5.89128	1.6307	7.31382
337	56.788	57.393	48.512	63.029	46.496	36.903	37.987	41.116	21.678	21.076	23.628	19.292	12.595	8.543	14.028	9.758	3.583	4.736	2.065	2.143	1.639	4.48	7.351	3.385	4.354	2.129	12.411	12.596	31.787	17.074	26.294	9.738	16.953	14.006	9.138	12.809	48.528	16.3248	3.5865	16.2806	9.72783	5.80932	1.73962	7.31358
338	56.233	56.8	48.249	62.567	46.693	37.322	38.046	41.055	21.639	21.071	23.274	19.409	13.274	8.413	14.361	9.69	3.539	4.755	1.997	2.086	1.572	4.525	6.98	3.463	3.826	2.204	12.404	12.539	31.556	16.902	26.184	9.73	16.527	14.106	9.069	12.592	48.3706	16.3914	3.4947	16.1609	9.40688	5.7111	1.64992	7.25717
339	56.329	57.194	48.208	62.594	45.797	36.826	37.579	40.8	21.596	21.132	23.087	19.387	12.939	8.17	14.257	9.763	3.562	4.584	2.014	2.129	1.717	4.315	6.811	3.383	4.391	2.512	12.316	12.399	31.685	16.936	26.271	9.425	16.342	13.607	8.918	12.587	48.1659	16.2914	3.5418	16.0486	9.68695	5.74814	1.55774	7.377
340	56.486	56.519	48.218	62.853	46.586	36.586	37.069	40.17	21.608	20.811	23.231	19.565	12.774	8.263	14.15	9.564	3.454	4.637	2.014	2.102	1.649	4.558	7.141	3.559	4.385	1.932	12.246	12.512	31.442	16.775	26.442	9.116	16.571	14.159	8.503	13.04	48.0609	16.2458	3.5431	16.0806	9.8437	5.78448	1.71551	7.38133
341	55.808	56.332	47.349	62.377	46.168	35.657	37.749	39.735	21.363	20.833	23.551	19.381	12.517	7.961	13.829	9.304	3.492	4.695	1.987	2.027	1.687	4.266	6.423	3.78	4.054	2.646	12.372	12.474	31.361	16.809	25.907	9.003	16.325	14.105	8.799	12.997	47.6469	16.0924	3.5057	16.0152	9.75127	5.93785	1.4689	7.25629
342	55.717	56.133	47.901	62.267	46.024	35.933	37.513	40.507	21.343	20.774	23.142	19.227	12.997	8.27	14.207	9.781	3.435	4.558	2.025	2.076	1.555	5.121	6.704	3.345	4.051	2.199	12.211	12.4	31.461	16.643	25.944	8.942	16.087	13.686	8.875	12.18	47.7494	16.2176	3.5069	15.8429	9.59458	5.64476	1.63378	7.34805
343	55.946	56.293	47.284	61.898	46.073	36.187	36.676	40.611	21.416	20.798	23.26	19.361	12.829	8.06	14.064	9.571	3.485	4.621	2.044	2.121	1.674	4.442	6.638	3.538	3.997	2.025	12.184	12.436	31.348	16.889	25.72	9.233	15.979	14.016	8.831	12.395	47.621	16.1699	3.4585	15.9031	9.6401	5.78552	1.55471	7.24277
344	55.547	56.297	47.688	62.118	46.011	35.646	37.32	40.58	21.2	20.721	23.048	19.039	12.699	8.084	14.427	9.635	3.439	4.565	2.023	2.122	1.744	4.674	6.461	3.158	4.109	2.124	12.233	12.418	31.243	16.746	25.914	9.067	16.108	13.941	8.494	12.99	47.6509	16.1066	3.4419	15.9154	9.63575	5.66561	1.52006	7.27141
345	55.49	55.929	47.836	61.565	45.09	35.637	36.502	40.705	21.171	20.617	23.232	18.923	12.587	8.103	13.964	9.542	3.449	4.55	2.082	2.173	1.588	4.582	6.722	3.219	4.093	1.956	12.176	12.408	31.043	16.698	25.853	8.822	16.453	13.749	8.282	13.055	47.3442	16.0174	3.4414	15.8539	9.60876	5.71666	1.5939	7.27407
346	55.383	55.891	47.375	60.981	45.841	35.772	36.2	39.268	21.149	20.729	22.856	19.216	12.744	8.211	13.667	9.296	3.392	4.62	2.013	1.929	1.567	4.024	6.93	3.118	4.054	2.167	12.177	12.39	30.953	16.609	25.737	8.676	15.972	13.435	8.612	12.54	47.0889	15.9835	3.3814	15.7101	9.62664	5.7056	1.62653	7.24457
347	54.792	55.891	47.571	60.798	45.484	36.977	37.232	39.217	21.039	20.478	22.805	19.035	13.178	8.09	13.811	9.525	3.428	4.466	2.048	2.052	1.55	4.95	6.77	3.576	3.886	2.112	12.031	12.238	31.258	16.545	25.773	8.696	16.426	13.065	8.335	12.192	47.2452	15.9951	3.4838	15.6559	9.17094	5.58329	1.62686	7.3992
348	55.075	55.764	47.009	60.882	45.652	36.191	36.861	40.144	20.848	20.573	23.064	18.972	12.086	7.616	14.055	8.83	3.361	4.569	2.089	1.994	1.615	4.587	6.558	3.101	4.442	2.221	12.047	12.33	31.089	16.493	25.6	8.625	16.028	14.032	8.869	12.922	47.1972	15.7555	3.4537	15.8035	9.2803	5.89761	1.56944	7.20632
349	54.956	56.044	47.62	61.033	46.076	35.293	36.217	40.179	21.05	20.82	22.866	19.04	12.29	8.066	13.81	9.319	3.448	4.548	2.039	1.964	1.673	4.234	6.232	3.33	4.341	2.192	12.031	12.334	30.929	16.613	26.012	8.709	15.95	13.82	8.469	12.995	47.1773	15.9076	3.4001	15.7862	9.58315	5.74698	1.46373	7.2716
350	55.112	55.776	47.1	60.793	45.484	35.712	36.632	40.385	20.985	20.566	22.916	19.051	12.448	8.168	13.828	9.502	3.408	4.523	1.973	2.023	1.559	4.653	6.779	3.308	4.066	2.259	12.035	12.218	30.86	16.567	26.011	8.469	16.236	13.757	8.365	12.504	47.1242	15.933	3.4551	15.7022	9.36503	5.65308	1.6088	7.32437
351	55.243	55.643	47.064	61.173	44.61	35.376	35.891	39.621	21.161	20.618	22.987	18.736	12.121	7.717	13.726	9.364	3.357	4.617	2.006	1.953	1.481	4.928	6.704	3.466	3.637	1.943	11.991	12.355	30.89	16.632	25.742	8.864	16.731	13.444	8.89	12.496	46.8276	15.8037	3.4092	15.8035	9.72462	5.81648	1.6545	7.20193
352	55.161	55.165	47.338	60.967	44.072	35.081	36.62	39.763	20.703	20.321	22.937	19.121	12.625	8.179	14.078	9.27	3.442	4.365	2.074	2.061	1.606	4.569	6.532	3.562	4.499	2.011	12.028	12.156	30.845	16.437	25.585	8.45	16.279	13.972	8.322	12.222	46.7709	15.9042	3.4721	15.6296	9.55282	5.6077	1.56312	7.27275
353	54.401	54.958	46.68	60.724	43.921	34.713	35.71	38.78	21.107	20.426	22.779	18.932	12.254	7.5	13.689	9.163	3.397	4.503	2.042	2.053	1.587	4.431	6.765	3.467	4.135	2.118	11.988	12.159	30.768	16.549	25.569	8.612	15.767	13.115	8.603	12.041	46.2359	15.7313	3.4498	15.5171	9.6907	5.8311	1.58856	7.24053
354	54.39	54.995	46.655	60.586	44.124	34.642	36.12	38.602	20.763	20.402	22.406	18.757	12.273	7.525	13.6	8.896	3.401	4.579	2.062	1.923	1.556	4.614	6.982	3.082	4.157	2.15	11.884	12.161	30.583	16.283	25.29	8.657	16.655	13.831	8.915	12.183	46.2642	15.5777	3.4506	15.6442	9.62728	5.74728	1.6759	7.0968
355	54.085	54.849	47.014	60.27	45.37	36.305	36.166	38.758	20.804	20.233	22.592	18.937	12.313	7.67	13.847	9.154	3.38	4.5	2.123	1.924	1.579	4.455	6.362	3.328	4.167	2.09	11.869	12.171	30.706	16.541	25.637	8.696	15.82	13.439	7.722	12.102	46.6021	15.6937	3.3908	15.4703	9.17276	5.69226	1.51037	7.31825
356	54.666	55.302	46.694	60.326	43.93	35.024	35.45	39.59	20.97	20.4	22.709	18.969	12.047	8.174	13.791	9.441	3.397	4.537	2.03	2.052	1.554	4.484	6.583	3.155	4.117	2.037	11.951	12.2	30.55	16.035	25.554	8.631	16.082	13.696	8.63	12.422	46.3727	15.8126	3.3946	15.5751	9.58704	5.63634	1.56818	7.13947
357	54.904	54.814	46.343	60.021	44.733	34.542	35.71	39.902	20.634	20.312	22.517	18.574	11.911	7.793	13.534	9.304	3.451	4.425	2.075	1.958	1.592	4.734	6.439	3.325	4.559	2.208	11.881	12.116	30.497	16.348	25.543	8.92	15.351	13.43	8.456	12.391	46.3711	15.5724	3.4766	15.4933	9.47578	5.64033	1.55932	7.13307
358	54.602	54.653	46.252	60.087	44.709	34.846	35.759	38.529	20.742	20.227	22.701	18.747	12.151	7.779	13.784	9.296	3.332	4.397	2.096	1.999	1.509	4.573	7.066	3.388	3.989	2.049	11.83	12.063	30.488	16.415	25.402	8.638	15.349	13.564	8.428	12.471	46.1796	15.6784	3.4398	15.4648	9.51608	5.65976	1.67364	7.1402
359	54.663	55.251	46.908	59.928	43.955	34.49	35.199	38.743	20.647	20.306	22.64	18.868	11.803	7.127	13.259	8.137	3.306	4.459	2.031	1.961	1.571	4.939	6.981	3.84	4.456	2.647	11.902	12.044	30.462	16.251	25.435	9.048	15.707	13.893	8.702	12.32	46.1421	15.3484	3.6191	15.5764	9.71941	6.03252	1.66694	7.05958
360	54.611	54.893	46.305	59.742	44.372	34.688	35.02	38.636	20.729	20.529	22.574	18.668	11.69	7.589	13.568	8.984	3.363	4.334	2.057	1.992	1.623	4.778	6.76	3.539	4.01	2.072	11.796	12.087	30.352	16.373	25.512	8.734	15.634	13.065	8.221	12.029	46.0334	15.5414	3.4528	15.3803	9.61815	5.80626	1.60323	7.17687
361	54.354	54.459	46.089	59.491	45.422	35.153	35.735	38.141	20.465	19.939	22.676	18.491	11.692	8.226	14.395	9.129	3.349	4.392	2.141	1.886	1.503	4.951	6.604	3.653	4.111	1.927	11.813	12.065	30.518	16.296	25.499	8.256	15.867	13.627	8.101	12.616	46.1055	15.6266	3.4517	15.4658	9.32275	5.52774	1.62776	7.232
362	54.375	54.413	46.157	59.362	44.187	34.775	35.137	38.8	20.525	20.269	22.474	18.714	11.898	7.664	13.27	8.948	3.363	4.386	2.003	1.961	1.517	4.553	6.949	3.021	4.055	2.498	11.805	12.077	30.373	16.114	25.194	8.573	15.561	13.173	8.272	12.623	45.9007	15.4703	3.4306	15.3765	9.40016	5.72254	1.62765	7.10788
363	53.95	54.655	46.475	59.487	43.826	34.559	34.78	38.502	20.574	19.982	22.657	18.52	11.593	7.668	13.023	8.65	3.374	4.379	2.091	1.951	1.573	4.867	6.877	3.248	4.446	2.092	11.826	12.005	30.197	16.256	25.183	8.493	15.146	13.379	8.424	12.471	45.7792	15.3334	3.4898	15.338	9.54372	5.80169	1.66997	7.06125
364	54.297	54.62	46.6	59.688	44.234	34.32	35.56	38.916	20.458	20.147	22.441	18.658	11.779	7.553	13.306	8.245	3.285	4.455	2.069	1.808	1.445	4.841	6.451	3.143	3.969	2.222	11.719	12.035	30.141	16.164	25.302	8.621	15.875	13.045	8.074	11.975	46.0294	15.3234	3.3688	15.2951	9.48365	5.8374	1.57787	7.13225
365	54.163	54.566	46.284	59.382	43.484	34.381	35.652	39.009	20.389	19.845	22.251	18.531	12.128	7.426	13.202	9.332	3.306	4.276	2.066	1.968	1.546	4.45	6.802	3.025	3.717	2.184	11.656	11.955	30.135	15.99	25.218	8.956	15.652	13.171	8.112	12.235	45.8651	15.388	3.334	15.308	9.3832	5.57198	1.57748	7.06597
366	54.152	54.666	46.073	59.48	43.622	34.091	35.677	38.602	20.47	19.979	22.553	18.725	11.751	7.707	13.615	9.025	3.258	4.342	2.028	1.996	1.571	4.882	7.269	3.784	4.234	2.505	11.759	11.93	30.086	16.067	25.203	8.64	16.162	13.681	7.977	12.469	45.7954	15.4781	3.5869	15.3974	9.49969	5.67159	1.71809	7.07456
367	54.193	54.55	46.295	59.563	43.361	33.583	35.017	38.055	20.684	19.93	22.454	18.636	12.219	7.414	13.007	9.234	3.298	4.349	2.027	1.917	1.566	4.457	6.607	3.045	3.837	2.308	11.566	11.989	29.98	16.02	25.424	8.456	15.686	13.478	8.753	11.676	45.5771	15.4473	3.3411	15.3028	9.76681	5.68576	1.53608	7.06892
368	54.32	54.462	46.246	59.652	43.351	33.834	34.352	38.234	20.289	19.956	22.426	18.857	11.537	7.614	12.974	9.476	3.266	4.352	2.128	1.859	1.484	4.934	7.167	3.276	3.742	2.125	11.677	11.954	30.01	16.229	25.34	9.298	15.753	12.831	8.184	12.049	45.5564	15.3911	3.4333	15.3325	9.83221	5.63786	1.72814	7.03872
369	53.95	54.147	45.872	58.828	42.44	33.299	34.531	37.672	20.299	20.046	22.165	18.589	11.437	7.599	13.447	8.56	3.239	4.324	2.039	1.923	1.653	4.772	6.518	3.156	3.847	2.226	11.555	11.936	29.966	16.086	25.46	8.471	15.772	13.865	8.68	11.977	45.0924	15.2677	3.3697	15.3768	9.72803	5.71391	1.53472	7.05535
370	54.029	53.805	45.93	59.147	43.331	34.11	34.895	37.064	20.282	19.868	22.198	18.437	11.835	7.705	13.202	8.434	3.293	4.242	2.097	1.763	1.403	4.744	6.287	3.304	4.158	2.236	11.604	11.952	29.858	15.967	25.193	8.917	15.075	13.614	8.659	11.92	45.2889	15.2451	3.3527	15.2759	9.60546	5.66089	1.53273	6.94645
371	53.634	53.996	45.658	58.57	43.647	33.874	35.145	37.846	20.264	19.894	22.247	18.414	11.665	7.61	13.355	9.052	3.31	4.299	2.076	1.85	1.536	4.42	6.605	3.165	4.006	2.181	11.6	11.838	29.928	16.091	24.891	8.912	15.564	13.514	8.639	12.259	45.2963	15.3126	3.3448	15.3236	9.36001	5.59174	1.55051	6.9117
372	53.784	53.681	45.648	58.918	43.212	33.82	34.487	37.862	20.335	19.815	22.238	18.472	11.832	7.497	12.827	8.391	3.211	4.295	2.037	1.835	1.482	4.909	6.173	2.688	3.917	2.052	11.422	11.891	29.726	16.128	25.226	8.686	16.146	13.355	8.209	12.242	45.1765	15.1759	3.2599	15.3031	9.53238	5.73927	1.53421	7.00681
373	53.588	53.489	45.585	58.656	42.146	33.64	33.503	37.368	20.126	20.037	22.177	18.478	12.046	7.395	13.267	8.884	3.237	4.218	2.108	1.909	1.426	4.905	6.786	3.437	4.471	2.141	11.459	11.795	29.813	16.072	25.112	8.811	15.531	13.516	7.996	11.491	44.7469	15.3012	3.4638	15.1596	9.70829	5.62517	1.66358	7.05171
374	53.506	53.963	45.343	58.221	42.317	34.392	34.613	37.287	20.02	19.764	22.115	18.57	11.28	7.235	13.019	8.816	3.163	4.362	2.054	1.94	1.467	4.731	6.339	3.375	4.248	2.357	11.524	11.773	29.687	15.848	25.241	8.524	15.848	13.602	8.408	12.7	44.9552	15.1024	3.4036	15.3155	9.37087	5.70063	1.52309	6.9615
375	53.339	53.767	45.534	58.424	42.5	32.99	34.157	37.769	20.113	19.824	21.983	18.466	11.129	7.314	12.831	8.779	3.236	4.286	2.012	1.864	1.473	4.204	6.885	3.731	4.212	2.113	11.534	11.86	29.649	15.987	25.046	7.796	15.683	12.897	8.103	12.285	44.81	15.0549	3.4016	15.084	9.61359	5.7025	1.63394	7.07121
376	53.155	53.646	45.672	58.058	44.265	33.672	34.452	36.777	20.005	19.625	21.941	18.191	11.651	7.558	13.405	8.553	3.177	4.202	2.038	1.689	1.476	4.317	6.974	3.361	4.007	2.441	11.556	11.708	29.665	15.881	25.267	8.237	15.886	12.997	8.588	12.394	44.9621	15.1161	3.3682	15.2179	9.41086	5.5472	1.63541	7.00725
377	53.532	53.556	45.083	58.321	41.609	32.886	33.258	37.195	19.78	19.799	21.885	18.278	11.33	7.261	13.205	8.709	3.171	4.258	2.074	1.851	1.474	4.71	6.792	3.574	4.246	2.474	11.316	11.724	29.506	15.824	25.218	8.855	15.338	14.055	8.707	12.611	44.43	15.0309	3.4624	15.3154	9.84086	5.6084	1.6139	6.85482
378	53.376	53.262	45.922	58.204	42.552	33.079	34.576	36.805	19.838	19.596	22.258	18.261	11.463	7.642	13.307	8.837	3.217	4.23	2.118	1.866	1.485	4.949	6.64	3.401	3.966	1.877	11.383	11.712	29.565	15.723	25.077	8.647	15.278	13.576	8.185	11.572	44.722	15.1502	3.3749	15.0718	9.53876	5.54412	1.63016	6.98181
379	53.687	53.734	45.756	58.576	43.013	34.144	34.682	36.254	20.215	19.781	22.33	18.752	11.408	7.39	13.195	8.4	3.254	4.243	2.14	1.934	1.532	4.491	7.133	3.277	4.103	2.115	11.342	11.825	29.431	16.126	25.27	8.899	15.707	13.457	8.29	12.267	44.9808	15.1839	3.4222	15.2614	9.57211	5.79683	1.67463	6.91511
380	53.459	53.262	45.169	58.142	42.121	32.538	33.89	36.771	20.078	19.634	21.977	18.386	11.054	7.011	12.485	8.483	3.227	4.249	2.105	1.838	1.45	4.66	6.975	3.155	4.146	2.513	11.465	11.8	29.444	15.855	25.052	8.629	15.796	13.681	8.628	12.495	44.419	14.8885	3.4318	15.2845	9.74382	5.80019	1.64761	6.84893
381	53.062	53.297	45.291	57.459	42.315	32.086	33.028	36.266	20.019	19.68	22.11	18.39	11.144	6.703	12.436	8.598	3.142	4.251	2.066	1.797	1.471	4.552	6.941	3.601	4.253	2.58	11.299	11.689	29.306	15.797	25.077	8.761	15.774	13.241	8.761	11.766	44.1005	14.885	3.4654	15.1471	9.82902	5.85906	1.63722	6.85799
382	53.021	52.924	44.887	57.66	42.243	32.145	33.395	36.058	19.979	19.322	22.197	18.5	11.03	7.158	13.199	8.205	3.179	4.193	2.122	1.916	1.629	4.984	7.233	3.571	4.398	2.437	11.262	11.669	29.33	15.935	25.227	8.936	15.794	13.515	8.922	11.541	44.0416	14.9488	3.5662	15.2131	9.76549	5.78384	1.71681	6.86329
383	54.072	53.778	45.706	58.502	41.914	33.006	33.351	36.236	19.958	19.771	22.064	18.237	11.585	7.052	13.203	8.692	3.317	4.186	2.08	1.976	1.618	4.685	6.506	3.208	4.385	2.059	11.306	11.567	29.317	16.014	25.117	9.073	15.71	13.785	8.7	12.23	44.5706	15.0703	3.402	15.2819	10.0468	5.67622	1.55185	6.81067
384	53.215	52.943	44.984	57.359	42.411	32.969	34.276	35.827	19.677	19.479	21.967	18.15	11.55	7.655	13.71	8.534	3.211	4.224	2.134	1.709	1.531	4.582	6.394	3.206	4.075	2.152	11.354	11.728	29.391	15.506	25.037	8.411	16.052	13.893	8.108	12.183	44.248	15.0902	3.3218	15.1663	9.48227	5.47275	1.52828	6.93624
385	53.057	53.018	44.968	57.703	41.465	33.351	34.326	36.838	19.623	19.494	21.95	18.269	11.236	7.389	12.724	8.393	3.163	4.242	2.13	1.965	1.654	4.777	6.963	3.303	4.534	2.377	11.302	11.668	29.351	15.93	24.721	8.188	15.851	13.78	9.136	12.163	44.3408	14.8848	3.5108	15.209	9.37963	5.62365	1.64303	6.80446
386	52.91	52.451	45.072	57.456	42.444	32.287	34.233	36.603	19.613	19.359	21.537	18.111	11.195	7.459	13.102	8.551	3.146	4.202	2.064	1.853	1.409	5.088	6.818	3.396	4.01	2.387	11.236	11.625	28.988	15.746	24.863	9.091	15.464	13.216	8.674	11.648	44.182	14.8659	3.4373	15.0551	9.43005	5.46527	1.65886	6.73792
387	52.165	52.784	44.776	57.196	42.986	32.104	33.248	36.066	19.584	19.319	21.765	18.123	11.202	7.387	12.847	8.565	3.201	4.185	2.133	1.916	1.661	5.014	6.73	3.238	4.108	2.382	11.193	11.551	29.016	15.702	25.142	9.001	15.583	13.099	8.777	11.654	43.9156	14.849	3.4568	15.0718	9.55886	5.52177	1.5886	6.79871
388	53.312	52.601	44.857	57.608	41.827	31.578	32.859	36.792	19.893	19.333	21.966	18.103	11.273	7.225	12.759	8.372	3.264	4.186	2.16	1.796	1.46	4.391	7.015	3.635	4.479	2.587	11.25	11.559	29.041	15.755	24.871	8.371	16.312	13.56	8.564	12.308	43.9292	14.8655	3.4973	15.1591	9.86819	5.65709	1.64473	6.8086
389	52.734	52.677	44.691	57.612	41.248	32.169	32.666	36.144	19.801	19.363	21.877	18.133	11.081	7.195	12.546	8.675	3.155	4.147	2.097	1.883	1.509	4.612	7.071	3.431	4.453	2.451	11.127	11.539	29.095	15.82	25.061	8.338	15.07	13.219	8.444	11.847	43.7426	14.8339	3.4809	14.956	9.81638	5.62238	1.66944	6.8961
390	52.992	52.588	44.567	57.529	41.311	31.852	32.33	35.93	19.746	19.363	21.739	18.135	11.316	7.058	12.921	8.067	3.181	4.257	2.035	1.859	1.448	5.58	6.749	3.683	4.332	2.3	11.178	11.641	28.929	15.649	24.905	9.472	15.518	13.929	8.538	11.671	43.6374	14.7931	3.5424	15.143	9.9501	5.67572	1.72417	6.69201
391	52.854	52.841	44.981	57.52	41.903	31.706	32.91	35.691	19.657	19.035	21.933	18.136	11.049	6.873	12.567	8.445	3.256	4.094	2.112	1.842	1.482	5.028	7.003	3.358	4.436	2.515	11.218	11.49	28.852	15.711	24.943	9.026	15.967	12.975	8.263	11.496	43.8008	14.7119	3.5126	14.9941	9.91074	5.67893	1.68757	6.80081
392	53.051	52.362	45.143	57.496	42.369	31.922	33.269	36.232	19.582	19.272	21.831	18.102	10.861	7.417	13.087	8.362	3.196	4.063	2.157	1.829	1.594	4.899	6.799	3.186	4.112	2.342	11.044	11.507	28.806	15.859	25.122	9.118	15.548	12.92	8.645	11.137	43.9805	14.8143	3.4177	14.9706	9.70511	5.57558	1.60641	6.80012
393	52.771	52.949	44.541	57.2	41.465	32.128	32.614	34.552	19.658	19.172	21.857	18.073	11.218	7.299	12.704	8.024	3.315	4.161	2.129	1.813	1.609	5.119	6.733	3.561	4.399	2.626	11.196	11.563	28.842	15.842	25.034	8.731	14.989	13.324	8.673	11.83	43.5275	14.7506	3.5465	15.0024	9.97166	5.6393	1.61246	6.76152
394	52.525	52.282	44.908	56.48	41.402	31.725	32.52	36.274	19.604	19.051	21.74	17.746	11.402	6.968	12.48	8.931	3.164	4.224	2.142	1.813	1.505	4.784	7.038	3.589	4.061	2.96	11.047	11.407	28.643	15.709	24.736	9.34	15.667	13.569	8.679	12.025	43.5145	14.7402	3.528	15.0822	9.59809	5.48605	1.6357	6.60998
395	52.84	52.467	44.211	57.087	39.752	31.476	32.378	35.303	19.638	18.933	21.753	18.057	10.739	7.025	13.08	8.645	3.161	4.118	2.104	1.906	1.673	5.135	7.139	3.688	4.085	2.695	11.013	11.387	28.842	15.821	24.891	9.796	15.87	13.645	8.766	11.404	43.1893	14.7338	3.5704	15.1435	10.0107	5.5702	1.67385	6.66933
396	52.719	52.32	44.211	57.196	40.71	31.934	33.153	34.784	19.463	19.041	21.649	17.984	11.092	7.069	12.446	7.942	3.285	4.168	2.114	1.811	1.541	4.62	6.662	3.475	4.491	2.674	11.066	11.446	28.711	15.751	24.962	9.351	15.293	13.616	8.81	11.585	43.3784	14.5858	3.4841	15.0591	9.82224	5.63788	1.56414	6.66467
397	52.896	52.007	44.633	56.472	40.872	31.567	32.456	35.712	19.566	19.411	21.722	18.135	10.771	6.989	13.061	8.341	3.185	4.175	2.208	1.869	1.769	5.036	7.314	3.59	4.175	2.449	10.991	11.478	28.704	15.545	24.977	9.21	15.327	13.498	8.53	11.648	43.3269	14.7495	3.577	14.9908	9.72402	5.66921	1.70931	6.709
398	53.242	52.606	44.597	56.743	41.26	31.348	32.27	35.226	19.438	19.317	21.66	18.076	11.141	7.261	13.113	8.495	3.269	4.15	2.187	1.868	1.629	5.358	6.927	3.527	4.617	2.479	11.106	11.338	28.671	15.689	24.974	9.198	15.235	13.251	8.566	11.685	43.4115	14.8126	3.6011	14.9713	10.0115	5.5101	1.69145	6.70472
399	52.837	52.402	44.292	56.557	40.531	31.275	32.337	35.114	19.732	19.11	21.556	17.988	10.602	6.576	12.932	8.073	3.258	4.193	2.154	1.887	1.641	5.13	6.992	3.721	3.955	2.715	11.056	11.388	28.407	15.771	25.048	9.168	15.469	13.835	8.86	11.603	43.1681	14.5711	3.5646	15.0605	9.92731	5.76055	1.63604	6.62234
400	52.481	52.314	44.563	56.61	41.28	31.03	32.184	34.844	19.438	19.297	21.62	17.925	10.545	7.057	12.678	7.785	3.176	4.133	2.186	1.77	1.61	4.929	6.365	4.012	4.186	2.616	10.865	11.357	28.593	15.767	24.974	9.095	15.351	13.663	9.012	11.991	43.1632	14.5431	3.4983	15.0668	9.95596	5.72284	1.5115	6.6404
401	52.573	51.846	44.457	55.806	41.267	31.811	31.879	34.794	19.325	18.963	21.689	17.882	11.212	6.984	12.698	8.193	3.329	4.178	2.214	2.001	1.795	5.222	7.072	3.57	4.168	2.774	10.999	11.339	28.61	15.536	24.65	9.581	15.823	13.215	9.161	11.607	43.0541	14.6182	3.6323	15.0521	9.6747	5.56178	1.62701	6.55626
402	52.238	51.995	44.333	56.854	41.079	31.12	32.077	35.156	19.484	19.044	21.384	17.968	10.984	7.063	12.514	8.601	3.263	4.196	2.163	1.779	1.586	5.175	7.383	3.9	4.662	3.475	10.978	11.284	28.58	15.501	24.765	9.918	15.309	14.309	9.222	12.139	43.1065	14.6303	3.7582	15.2005	9.89614	5.49263	1.75375	6.47711
403	52.524	52.294	44.568	57.064	41.296	31.089	31.545	34.478	19.608	19.148	21.688	18.036	10.944	6.679	13.023	8.619	3.244	4.114	2.167	1.926	1.687	5.616	7.721	3.929	4.294	2.961	10.922	11.359	28.418	15.855	25.063	10.049	16.351	14.314	9.22	11.647	43.1073	14.7181	3.7659	15.3198	10.1831	5.63239	1.8462	6.51802
404	52.861	52.162	44.289	56.71	40.216	30.363	31.33	34.742	19.452	19.073	21.652	17.9	10.91	6.696	12.794	8.407	3.327	4.189	2.127	1.854	1.777	5.912	7.036	3.741	4.244	3.142	10.933	11.237	28.335	15.652	24.963	10.032	15.552	14.175	9.332	11.645	42.8341	14.6105	3.7349	15.1856	10.2985	5.62994	1.71843	6.47142
405	52.184	51.542	44.577	56.538	40.211	30.197	32.099	34.03	19.425	18.863	21.409	17.686	10.721	6.813	13.421	8.25	3.256	4.141	2.258	1.881	1.768	5.219	7.641	3.946	4.569	2.935	10.775	11.226	28.375	15.699	25.018	9.803	15.178	13.21	9.111	12.074	42.6723	14.5735	3.7614	15.0469	10.0939	5.53857	1.78619	6.543
406	52.091	51.538	44.484	56.147	39.513	30.758	30.638	34.423	19.195	18.818	21.48	17.879	10.413	6.43	12.846	8.057	3.342	4.188	2.195	1.823	1.805	5.435	7.232	3.774	3.988	2.816	10.915	11.223	28.35	15.443	24.775	9.911	15.642	13.593	9.277	11.549	42.449	14.3898	3.6598	15.0678	10.1177	5.69217	1.70243	6.47927
407	52.24	51.646	43.67	56.806	40.877	30.791	31.836	34.628	19.539	18.66	21.182	18.095	11.445	6.733	12.751	8.22	3.262	4.055	2.112	1.864	1.739	5.824	7.189	3.614	4.14	2.926	10.689	11.109	28.225	15.617	25.144	10.175	15.098	14.206	9.276	11.558	42.8117	14.5781	3.6725	15.1097	9.99424	5.50815	1.74906	6.50059
408	52.18	51.702	43.743	56.669	40.193	31.277	32.188	33.391	19.237	18.948	21.828	18.145	10.393	6.929	13.623	7.889	3.347	4.141	2.189	1.951	1.84	5.552	7.215	4.284	4.445	3.173	10.774	11.137	28.144	15.44	24.682	10.588	15.592	13.555	9.928	11.61	42.6679	14.624	3.8137	15.145	10.0075	5.70399	1.69805	6.31042
409	51.822	51.524	43.823	56.415	40.807	30.629	31.218	35.354	19.068	18.841	21.305	17.746	10.698	6.676	13.311	8.333	3.38	4.275	2.19	1.918	1.873	5.931	7.084	4.298	4.831	3.303	10.825	11.232	28.279	15.483	24.679	10.609	15.269	14.018	9.763	11.84	42.699	14.4973	3.9083	15.1997	9.89609	5.49898	1.73256	6.31759
410	52.136	52.278	44.112	56.638	40.937	31.068	32.031	35.074	19.519	18.83	21.628	17.925	11.003	6.698	13.339	7.92	3.33	4.061	2.205	1.799	1.796	5.233	7.537	4.015	4.639	3.375	10.688	10.937	28.127	15.469	25.031	10.794	15.575	13.918	9.338	12.059	43.0343	14.6078	3.799	15.1936	9.90338	5.65849	1.7576	6.39257
411	51.827	51.457	43.467	55.968	40.34	31.524	31.07	33.623	19.2	18.697	21.259	17.938	10.758	6.974	13.423	7.819	3.465	4.147	2.234	1.944	2.065	5.382	7.603	4.061	4.362	3.279	10.734	11.029	28.283	15.438	24.795	10.18	15.263	14.215	9.296	11.658	42.4095	14.5085	3.8542	15.0891	9.8855	5.52458	1.72342	6.44707
412	51.537	51.246	43.585	55.957	40.556	31.197	31.595	34.831	19.016	18.619	21.272	18.07	11.083	6.909	13.561	8.764	3.354	4.186	2.212	1.83	1.867	5.649	7.474	3.85	4.477	4.029	10.721	10.926	28.116	15.299	24.78	10.864	15.44	13.58	9.969	11.521	42.563	14.6617	3.8928	15.1216	9.63376	5.32968	1.75851	6.31803
413	51.965	51.144	43.537	55.78	39.736	30.546	31.519	34.251	19.283	18.6	21.369	17.849	10.874	7.578	13.371	7.895	3.363	4.245	2.241	1.981	1.996	6.02	6.961	3.964	4.918	3.752	10.586	11.018	28.074	15.708	24.855	11.026	14.922	13.875	10.153	11.318	42.3098	14.6024	3.9441	15.1535	9.86057	5.39795	1.6791	6.30494
414	51.931	51.722	43.594	55.395	39.988	30.617	31.039	34.455	19.163	18.77	21.369	17.895	10.477	7.247	13.3	7.865	3.483	4.142	2.21	1.952	2.057	5.685	7.225	4.131	4.177	3.537	10.669	11.038	27.972	15.239	24.914	10.83	14.977	13.415	9.756	11.707	42.3426	14.5107	3.8599	15.0517	9.89127	5.51541	1.6589	6.31832
415	51.778	51.422	43.544	55.694	39.979	30.281	31.198	33.533	19.474	18.467	21.328	17.737	10.555	6.886	12.615	8.045	3.361	4.205	2.267	1.898	2.091	6.123	7.609	4.674	4.996	4.432	10.545	11.036	27.839	15.572	24.877	10.934	15.444	13.876	10.33	12.313	42.1786	14.3884	4.1656	15.2766	10.0273	5.55793	1.83809	6.18726
416	52.226	50.991	43.463	55.922	39.543	30.899	31.006	33.24	19.286	18.459	21.343	17.946	10.854	7.012	13.247	8.02	3.513	4.253	2.248	1.995	2.106	5.916	7.357	4.478	4.526	4.575	10.608	11.025	27.882	15.494	24.905	11.767	15.616	14.066	10.399	11.616	42.1612	14.5209	4.0967	15.3378	10.0573	5.47985	1.72113	6.16958
417	51.841	51.086	43.691	55.902	38.929	29.853	30.83	33.944	19.144	18.782	21.453	17.836	10.489	7.044	13.142	8.142	3.56	4.187	2.233	2.016	2.033	6.311	7.308	4.794	5.061	5.127	10.676	10.942	27.911	15.305	24.897	12.23	15.618	14.283	10.971	12.103	42.0095	14.504	4.263	15.4936	10.1571	5.5204	1.81886	6.06135
418	51.901	50.844	43.785	55.996	37.783	30.534	31.17	33.836	19.262	18.579	20.892	17.947	10.82	6.846	13.707	7.92	3.512	4.196	2.265	2.045	2.277	6.201	8.119	4.379	4.66	4.561	10.591	10.889	27.89	15.604	24.957	12.126	16.113	14.213	10.064	11.486	41.9811	14.4966	4.2215	15.3933	10.0606	5.45247	1.89419	6.21183
419	51.888	50.33	43.685	55.489	39.08	29.915	30.46	33.169	19.215	18.621	21.225	17.724	11.283	6.927	13.99	7.456	3.647	4.202	2.319	2.012	2.263	6.2	7.828	4.397	4.803	4.117	10.584	10.929	27.75	15.421	24.733	11.518	15.053	13.894	10.401	11.913	41.752	14.5551	4.1788	15.2196	10.1221	5.50826	1.82423	6.12004
420	51.447	50.737	43.316	54.541	39.703	30.156	30.156	33.201	19.026	18.49	21.367	17.726	10.396	6.407	14.088	7.896	3.708	4.284	2.367	1.984	2.379	6.371	7.937	4.912	4.868	4.515	10.577	10.952	27.804	15.383	24.546	11.39	15.277	14.34	10.928	11.972	41.6571	14.4245	4.3325	15.3169	9.90605	5.60668	1.86759	6.05029
421	51.714	50.645	43.361	54.801	38.388	29.785	30.678	33.516	18.946	18.369	21.19	17.493	10.699	6.547	13.161	7.91	3.694	4.272	2.386	1.941	2.345	6.552	7.477	4.3	4.967	4.981	10.577	10.943	27.819	15.336	24.681	12.353	15.369	13.921	10.685	11.934	41.611	14.2894	4.2915	15.3618	9.97156	5.49044	1.81019	6.04797
422	51.323	50.526	42.953	54.922	39.96	30.283	30.485	32.492	19.195	18.372	21.062	17.646	10.822	6.536	14.218	7.613	3.743	4.401	2.379	1.947	2.355	6.428	7.618	4.921	4.921	5.23	10.535	11.014	27.757	15.112	24.563	12.125	15.129	14.312	11.374	11.528	41.618	14.433	4.3943	15.3449	9.9339	5.53457	1.83833	5.98886
423	51.055	50.554	43.546	55.026	39.477	29.853	30.234	33.226	18.842	18.14	21.26	17.666	10.66	6.925	13.74	7.784	3.8	4.215	2.449	1.98	2.41	6.331	7.901	4.789	5.195	5.195	10.49	10.789	27.641	15.246	24.667	12.344	14.793	14.439	11.377	11.624	41.6214	14.3771	4.4265	15.341	9.96724	5.41837	1.86819	5.98286
424	51.651	51.23	43.71	55.795	39.129	29.78	30.631	32.968	19.131	18.414	21.352	17.687	10.773	6.796	14.122	7.577	3.848	4.352	2.446	1.998	2.525	6.747	8.075	4.422	5.108	4.787	10.442	10.853	27.642	15.365	24.742	12.699	15.729	14.711	11.252	11.778	41.8618	14.4815	4.4308	15.5213	10.2804	5.5444	1.91678	5.96707
425	51.554	50.664	43.346	55.609	39.579	29.831	30.705	32.7	19.086	18.302	21.299	17.939	10.851	6.322	13.761	7.567	3.842	4.314	2.409	1.928	2.424	6.965	7.76	5.191	4.888	5.054	10.432	10.781	27.562	15.354	24.636	13.107	15.118	14.891	11.743	12.016	41.7485	14.3909	4.4775	15.564	10.148	5.63474	1.92638	5.86315
426	51.685	50.703	43.598	55.861	39.25	29.149	29.791	32.589	18.889	18.398	21.433	17.92	11.064	6.262	13.735	7.968	3.795	4.289	2.329	2.125	2.642	6.801	7.578	5.354	5.848	6.033	10.352	10.653	27.618	15.684	24.793	13.695	15.535	15.245	11.819	12.004	41.5782	14.4586	4.6794	15.7398	10.5094	5.56943	1.9348	5.88554
427	51.566	49.991	43.706	55.234	39.15	29.029	29.788	33.061	18.898	18.227	21.055	17.593	11.036	6.628	13.556	7.438	3.88	4.377	2.34	2.086	2.633	7.192	7.708	5.905	5.457	5.756	10.418	10.721	27.368	15.283	24.587	13.154	15.53	15.114	12.648	12.618	41.4406	14.3039	4.7334	15.7441	10.2561	5.47971	1.99552	5.71191
428	51.087	50.686	43.551	55.846	38.106	29.389	29.581	31.508	18.997	18.391	21.365	17.82	10.439	6.545	13.349	8.244	3.961	4.255	2.451	2.102	2.845	7.521	8.149	5.953	5.65	5.751	10.258	10.62	27.371	15.459	24.768	14.037	15.757	15.019	12.107	12.698	41.2193	14.3938	4.8638	15.8094	10.595	5.52474	2.0858	5.76344
429	51.715	50.75	43.211	55.876	38.837	29.092	29.727	32.223	18.716	18.146	21.301	17.883	10.302	6.674	13.586	7.676	3.958	4.315	2.455	2.164	2.58	7.5	8.368	6.086	5.988	6.226	10.267	10.605	27.406	15.599	25.044	13.89	15.449	15.145	12.479	12.549	41.4289	14.2855	4.964	15.8433	10.591	5.53779	2.19014	5.80778
430	51.87	50.868	43.335	55.953	38.314	29.274	29.623	32.484	18.961	18.313	21.337	17.806	10.305	6.34	13.623	7.499	4.061	4.418	2.357	2.186	2.933	7.557	8.212	6.031	6.004	6.704	10.352	10.644	27.214	15.308	24.741	13.908	15.5	15.881	13.01	12.625	41.4651	14.273	5.0463	15.9183	10.6202	5.67788	2.16552	5.65812
431	51.412	50.729	43.401	56.311	38.196	28.755	29.102	31.614	18.881	18.196	21.614	18.327	10.64	6	13.951	7.589	3.923	4.198	2.364	2.125	2.868	7.904	7.998	6.741	5.72	7.143	10.237	10.439	27.346	15.523	25.304	14.629	15.251	16.419	13.42	13.698	41.19	14.3998	5.0984	16.2266	10.8919	5.77236	2.28592	5.71274
432	51.364	51.023	43.562	56.449	38.089	28.445	29.343	31.817	19.072	18.501	21.311	18.245	10.439	6.36	13.516	7.447	4.046	4.28	2.44	2.333	2.992	8.015	8.645	7.065	6.368	7.453	10.071	10.473	27.138	15.893	24.922	15.3	16.073	16.408	14.162	13.155	41.2615	14.3614	5.3637	16.3595	10.9471	5.74004	2.41139	5.57983
433	51.407	50.583	43.393	56.292	38.323	29.339	29.252	31.707	19.089	18.514	21.4	17.843	10.556	6.654	14.007	7.955	4.093	4.195	2.428	2.201	3.118	7.821	9.013	7.203	6.707	7.512	10.081	10.341	27.222	15.675	24.966	15.475	16.383	17.023	14.467	13.894	41.287	14.5022	5.4291	16.5527	10.7343	5.55687	2.48909	5.56463
434	51.632	50.811	43.486	56.693	38.162	27.779	28.658	31.911	18.941	18.126	21.582	17.992	10.513	5.847	13.566	7.648	4.105	4.19	2.375	2.104	2.89	8.141	9.593	7.111	6.986	7.655	10.103	10.233	27.275	15.836	24.96	16.607	15.83	17.146	14.392	13.412	41.1415	14.2769	5.515	16.5794	11.2082	5.7745	2.68629	5.60857
435	51.493	50.736	43.705	57.011	37.618	28.719	28.751	31.828	19.024	18.197	21.665	18.222	9.746	6.105	13.261	7.165	4.156	4.279	2.446	2.049	3.025	8.801	8.391	7.664	6.642	8.093	10.002	10.166	27.169	15.948	25.061	16.772	15.787	17.686	15.741	13.911	41.2326	14.1731	5.5546	16.8243	11.1134	5.93878	2.63722	5.55761
436	51.992	50.515	43.782	57.187	37.478	28.788	28.853	31.874	18.948	18.215	21.67	18.145	10.48	6.314	13.1	7.713	4.103	4.214	2.359	2.274	3.247	9.691	9.281	8.038	7.556	8.038	9.916	10.1	27.224	16.05	25.432	17.12	15.874	18.003	15.697	13.494	41.3086	14.3231	5.8801	16.891	11.1658	5.72245	2.9151	5.68119
437	51.515	50.961	43.113	56.54	36.627	28.648	28.463	32.008	19.124	18.105	21.369	18.4	10.234	6.682	13.129	7.642	4.04	4.139	2.461	2.276	3.218	9.423	9.809	8.885	8.029	8.797	9.725	10.133	27.148	15.78	25.246	17.512	16.09	18.014	16.094	13.789	40.9844	14.3356	6.1077	16.9531	11.1193	5.66677	3.12356	5.63497
438	51.055	50.745	43.489	57.339	36.806	27.382	28.084	31.578	19.204	18.541	21.384	18.125	9.87	5.706	13.108	7.653	4.155	4.109	2.388	2.449	3.189	9.449	9.32	8.704	8.338	8.888	9.888	10.052	27.113	15.938	25.189	18.063	16.673	18.966	16.841	14.532	40.8097	14.1989	6.0989	17.3255	11.5113	5.92636	3.0637	5.5725
439	51.309	51.203	44.061	57.423	37.073	28.998	28.658	30.63	18.831	18.167	21.602	18.049	10.559	5.932	13.078	7.333	4.145	4.198	2.432	2.231	3.469	9.888	9.315	8.468	8.955	9.629	9.632	9.96	27.204	15.89	25.051	19.251	15.963	19.296	17.123	14.593	41.1694	14.1939	6.273	17.3963	11.3927	5.81646	3.22117	5.67327
440	52.468	51.011	44.59	58.069	36.111	28.084	27.706	30.43	19.342	18.537	21.671	18.466	9.488	6.421	13.276	7.782	4.277	4.314	2.424	2.435	3.483	9.273	9.699	9.244	8.48	10.065	9.69	9.986	26.827	16.169	25.5	19.452	16.333	19.958	17.265	14.496	41.0586	14.3729	6.3694	17.5676	12.0423	5.9014	3.22959	5.68104
441	51.923	50.555	44.144	57.477	36.222	28.847	28.67	30.496	19.003	18.765	21.523	18.25	10.099	5.677	12.823	7.11	4.292	4.147	2.378	2.301	3.695	9.849	9.438	9.286	8.464	9.529	9.677	9.92	26.965	16.153	25.606	20.038	15.814	18.722	17.788	15.209	41.0418	14.1563	6.3379	17.5892	11.4945	6.04206	3.21941	5.69398
442	51.193	50.032	43.81	56.545	37.43	29.183	28.095	30.328	19.146	18.535	21.181	18.064	9.77	5.963	13.141	7.819	4.39	4.077	2.554	2.442	3.611	9.61	10.072	10.046	8.988	11.068	9.646	9.88	26.914	16.172	25.067	19.22	15.83	20.613	18.644	15.599	40.827	14.2024	6.6858	17.7585	11.1329	5.80925	3.53435	5.6479
443	51.273	50.481	44.581	57.681	36.132	28.333	26.752	30.412	19.228	18.247	21.624	18.568	10.047	5.99	13.35	7.445	4.465	4.283	2.617	2.344	3.661	9.779	10.102	10.236	9.278	10.475	9.621	9.836	26.901	16.257	25.48	20.754	16.54	20.655	18.796	15.943	40.7056	14.3124	6.724	18.0783	11.8627	5.93726	3.49867	5.74111
444	51.607	50.199	44.81	57.409	35.94	28.036	27.816	30.682	19.498	18.661	21.125	18.372	9.559	5.354	13.258	8.221	4.542	4.343	2.609	2.556	3.704	10.681	9.9	10.721	9.086	11.617	9.619	9.849	26.775	16.434	25.597	21.724	15.393	20.984	20.475	15.975	40.8124	14.256	6.9759	18.2825	11.6776	5.97294	3.71877	5.8958
445	51.157	50.485	45.469	57.834	35.764	26.725	27.835	28.697	19.432	18.212	21.384	18.479	9.431	5.792	12.335	7.014	4.567	4.303	2.708	2.303	3.736	10.865	10.408	11.827	9.661	11.501	9.542	9.818	26.53	16.202	25.438	21.39	16.026	22.383	20.99	16.796	40.4958	14.0099	7.1879	18.5115	12.2493	6.11386	3.96049	5.88948
446	51.153	50.606	45.609	58.53	35.405	26.569	26.843	30.84	19.585	18.837	21.899	18.781	9.43	6.002	12.812	8.462	4.671	4.24	2.779	2.402	3.869	10.818	10.426	11.696	10.153	12.253	9.492	9.671	26.803	16.857	25.803	21.653	16.608	21.722	21.292	17.123	40.6944	14.476	7.3307	18.7024	12.3425	6.03516	4.03612	5.93719
447	51.981	50.272	46.288	59.21	36.366	27.464	26.069	29.247	20.039	18.497	21.937	18.976	9.645	5.535	13.497	7.142	4.796	4.093	2.799	2.653	4.453	12.035	11.209	12.147	10.533	13.213	9.359	9.468	26.834	17.444	25.907	23.261	17.136	22.806	21.834	16.975	40.8621	14.4085	7.7931	19.1024	12.7152	6.33608	4.35497	6.17748
448	51.483	50.24	45.469	59.095	35.039	27.191	26.906	29.96	19.689	18.642	21.616	18.668	9.619	5.552	12.98	7.848	4.751	4.235	2.831	2.412	3.98	11.373	11.59	12.653	10.65	12.86	9.462	9.499	26.822	17.122	26.313	24.064	16.83	23.796	22.397	17.469	40.6729	14.3268	7.7335	19.3774	12.4703	6.12141	4.4056	6.37048
449	51.8	50.724	45.765	58.931	35.665	27.404	26.288	29.765	19.518	18.725	21.782	19.191	9.616	5.776	12.921	7.758	4.754	4.201	2.766	2.595	4.435	12.108	11.21	13.542	10.984	13.604	9.42	9.649	26.56	16.997	25.978	23.264	17.047	23.945	22.862	18.045	40.7927	14.4109	8.0199	19.3767	12.5985	6.16337	4.62464	6.2355
450	50.682	49.65	45.645	58.94	34.74	26.888	26.422	30.236	19.659	18.718	21.957	19.134	9.023	5.315	12.641	7.117	4.869	4.236	2.68	2.789	4.456	11.989	11.454	13.057	11.339	13.534	9.396	9.54	26.465	17.176	25.948	24.466	16.235	23.966	23.187	18.814	40.4004	14.1955	8.0403	19.5193	12.3971	6.47051	4.56023	6.37799
451	51.382	49.571	45.855	58.559	35.805	26.861	26.424	30.233	19.585	18.644	21.579	19.046	9.63	5.931	12.705	8.125	5.034	4.217	2.762	2.634	4.43	12.41	11.679	13.417	11.74	14.414	9.457	9.464	26.736	17.551	25.81	24.509	16.503	24.809	24.095	18.167	40.5862	14.4056	8.2737	19.7101	12.3465	6.03258	4.81651	6.5172
452	51.092	50.046	45.591	58.487	35.289	26.624	26.109	29.532	19.277	18.422	21.616	18.851	10.064	6.029	12.846	7.499	4.966	4.163	2.828	2.645	4.368	13.424	11.036	14.563	11.647	14.7	9.448	9.546	26.665	16.986	26.178	23.764	16.479	24.837	23.619	17.581	40.3462	14.3255	8.434	19.5103	12.5338	5.98465	5.06142	6.48774
453	50.639	49.604	45.078	58.539	34.801	26.888	25.964	28.632	19.148	18.563	21.502	19.123	9.281	5.259	12.331	7.644	5.168	4.237	2.825	2.578	4.49	12.738	11.572	14.557	12.38	14.696	9.357	9.41	26.558	17.053	26.154	23.866	16.485	25.84	24.447	18.475	40.0181	14.1064	8.5241	19.7645	12.5362	6.22915	5.05696	6.64947
454	50.421	49.209	46.053	58.041	35.393	26.882	26.332	29.928	19.37	18.36	21.564	18.726	9.26	6.113	13.374	8.119	5.124	4.399	2.815	2.544	4.36	12.851	11.699	14.295	11.45	14.193	9.393	9.523	26.262	17.012	25.702	24.54	17.688	24.297	23.837	18.129	40.2824	14.3608	8.373	19.6383	12.1682	5.9282	4.90857	6.36192
455	50.564	49.038	45.219	57.721	35.42	27.051	25.629	28.635	19.358	18.359	21.562	18.959	9.448	5.819	12.471	6.857	5.368	4.234	2.862	2.661	4.632	12.564	11.84	14.432	12.001	15.186	9.17	9.387	26.538	17.131	25.962	24.134	17.017	24.123	24.414	18.884	39.9096	14.1041	8.578	19.676	12.2988	6.21528	5.03995	6.49028
456	50.85	49.287	45.773	58.077	34.72	26.751	26.301	29.315	19.111	18.463	21.116	19.203	9.961	5.575	12.484	7.559	5.342	4.332	2.962	2.504	4.715	12.189	12.123	14.369	11.805	15.235	9.237	9.412	26.398	17.16	26.429	24.076	16.729	23.976	23.21	17.915	40.1342	14.184	8.5576	19.4542	12.3588	6.03037	5.00803	6.43838
457	50.758	49.284	45.39	58.215	35.026	26.406	25.783	29.275	18.981	18.46	21.437	18.66	9.334	5.746	12.405	7.681	5.508	4.342	3.033	2.645	5.068	12.976	11.537	15.291	12.268	16.126	9.172	9.525	26.235	17.215	26.234	24.365	16.518	24.677	23.732	17.906	40.0171	14.088	8.8794	19.5579	12.4754	6.02422	5.2544	6.51388
458	50.316	48.91	45.337	57.871	35.103	26.855	25.793	28.559	19.396	18.437	21.499	18.772	9.31	5.746	12.744	7.177	5.472	4.285	3.048	2.587	5.017	13.388	12.047	15.896	11.899	16.187	9.27	9.396	26.158	17.231	26.017	24.786	16.575	25.375	24.349	18.361	39.843	14.1351	8.9826	19.7518	12.3229	6.16349	5.40825	6.61548
459	50.865	49.276	45.303	58.594	35.191	26.187	25.898	29.867	19.243	18.673	21.71	18.863	9.467	5.906	13.781	8.08	5.685	4.411	3.116	2.646	5.203	13.936	12.031	16.639	11.937	16.714	9.338	9.449	26.425	17.343	26.195	25.468	17.241	24.687	24.25	19.277	40.1476	14.4654	9.2318	19.9673	12.4971	5.99811	5.58729	6.5809
460	50.678	49.259	45.647	58.045	33.868	26.4	25.723	28.959	19.228	18.793	21.457	18.807	9.556	5.794	13.304	7.679	5.739	4.335	3.134	2.644	5.31	13.252	11.764	16.356	12.04	15.894	9.243	9.355	26.254	17.274	25.633	25.298	16.997	25.336	24.296	18.912	39.8224	14.3272	9.0468	19.8598	12.5659	6.04376	5.34788	6.60224
461	50.336	49.162	45.307	57.655	34.566	26.554	25.531	28.355	19.161	18.435	21.409	18.988	9.336	5.311	12.667	7.815	5.989	4.391	3.157	2.636	5.217	13.429	12.138	16.628	12.741	17.285	9.379	9.424	25.975	17.11	26.022	26.215	16.751	25.66	25.305	18.777	39.6833	14.1402	9.3611	20.0618	12.4506	6.13193	5.65924	6.797
462	50.267	48.609	45.508	58.023	34.425	26.65	25.332	28.85	19.284	18.438	21.354	18.591	8.811	5.908	12.852	7.115	5.89	4.459	3.185	2.654	5.436	13.825	12.527	17.066	12.55	18.052	9.202	9.482	26.068	17.095	25.656	25.671	16.766	24.807	25.047	18.772	39.708	14.0441	9.5644	19.8566	12.4372	6.13988	5.86152	6.64142
463	50.463	48.595	45.495	57.804	33.617	26.265	25.15	28.52	18.959	18.249	21.136	18.632	9.439	5.997	12.881	7.524	6.061	4.368	3.237	2.716	5.456	14.435	12.406	17.183	12.589	18.351	9.153	9.408	25.916	16.811	25.732	25.397	16.646	25.832	25.116	18.564	39.4886	14.1021	9.6802	19.8575	12.5933	5.89166	5.95493	6.75191
464	50.255	49.091	45.284	57.369	34.49	25.503	25.539	28.654	19.176	18.028	21.286	18.939	9.105	5.494	12.823	7.073	6.209	4.433	3.255	2.969	5.885	14.457	12.814	17.707	12.591	18.473	9.224	9.336	26.055	17.013	25.63	25.431	16.706	25.936	24.75	18.423	39.5231	13.9905	9.8793	19.8504	12.5013	6.16646	5.98857	6.72915
465	50.279	49.297	45.624	58.123	33.589	26.532	25.192	28.281	19.257	18.36	21.408	18.672	9.749	6.037	12.67	7.117	6.426	4.405	3.283	2.679	5.99	14.216	12.79	18.011	12.312	18.682	9.24	9.312	26.106	16.999	25.637	26.085	17.415	25.857	24.832	18.78	39.6146	14.1588	9.8794	20.0263	12.7059	6.02109	6.04782	6.75705
466	49.989	48.871	45.509	57.82	34.037	26.224	24.884	28.158	19.334	18.118	21.638	19.036	9.597	5.701	13.095	7.354	6.493	4.509	3.374	2.771	6.243	13.931	13.054	18.397	13.074	19.318	9.28	9.353	25.905	17.436	26.177	25.546	16.972	25.658	25.227	18.816	39.4365	14.2341	10.1164	20.037	12.6372	6.11695	6.18381	6.73733
467	49.965	48.764	44.997	57.239	33.996	25.615	24.806	28.361	18.99	18.208	20.897	18.637	8.977	5.966	13.178	7.777	6.468	4.466	3.389	2.53	6.139	14.323	12.601	18.759	13.193	19.943	9.239	9.364	25.902	17.043	25.532	25.606	16.58	25.793	25.249	19.327	39.2179	14.0787	10.1811	19.9635	12.5509	5.86521	6.39807	6.73117
468	49.411	48.298	44.696	56.441	34.015	25.217	25.063	27.556	18.87	17.9	20.899	18.578	9.524	5.653	12.911	7.581	6.668	4.487	3.479	2.551	6.055	14.462	12.641	18.754	13.112	19.57	9.289	9.281	25.851	16.641	25.589	26.537	16.56	25.73	25.132	18.915	38.8371	13.9895	10.1779	19.9525	12.371	5.85024	6.32051	6.8416
469	50.235	48.696	45.286	57.277	33.812	26.398	24.995	27.814	18.839	18.433	21.238	18.979	9.245	5.604	12.667	7.155	6.835	4.458	3.549	2.945	6.521	14.317	13.06	18.922	13.198	20.396	9.228	9.285	25.765	17.157	26.055	25.437	17.27	25.222	25.682	18.795	39.3141	14.02	10.4201	19.9896	12.5357	6.11762	6.39761	6.72349
470	49.943	48.384	45.257	56.639	33.811	26.226	25.304	27.458	18.87	18.044	21.061	18.726	9.299	5.74	12.478	7.166	6.93	4.52	3.608	2.612	6.656	14.959	12.919	19.302	12.929	20.45	9.273	9.308	25.772	16.729	25.795	26.351	16.753	25.915	25.426	18.803	39.1277	13.923	10.4885	20.0125	12.357	5.9948	6.50737	6.86151
471	49.895	48.075	44.893	56.8	33.419	26.193	24.863	27.664	18.804	18.21	21.267	18.487	9.328	5.983	13.037	7.429	7.025	4.447	3.553	2.816	6.718	15.006	12.508	19.758	13.232	21.18	9.234	9.304	25.679	16.932	25.568	26.528	16.776	25.322	25.378	18.493	38.9752	14.0681	10.6243	19.9214	12.399	5.90294	6.68116	6.79413
472	50	48.53	44.827	57.198	33.776	25.374	25.052	28.309	19.158	18.436	20.988	18.833	9.067	5.65	12.858	7.39	7.073	4.607	3.638	2.799	6.83	14.71	12.686	19.803	13.411	21.018	9.219	9.305	25.602	16.978	25.981	25.851	16.393	25.846	25.64	18.435	39.1333	14.0475	10.6575	19.925	12.5277	6.06522	6.61846	6.85179
473	49.39	48.013	44.691	56.561	34.035	25.717	24.429	27.95	18.867	18.086	20.906	18.472	9.382	5.637	12.697	7.55	7.157	4.554	3.695	2.806	6.919	14.72	12.979	19.869	12.656	21.025	9.22	9.302	25.563	16.711	25.511	25.298	17.23	25.762	25.373	18.324	38.8482	13.9496	10.638	19.8294	12.3363	5.88728	6.59819	6.69262
474	49.52	48.425	44.94	56.088	33.636	25.483	24.469	27.431	19.022	17.912	20.716	18.446	9.378	5.684	12.842	7.239	7.368	4.515	3.706	2.811	7.275	14.994	12.782	19.533	13.715	21.601	9.155	9.235	25.705	16.997	25.496	26.186	16.565	25.778	25.072	18.906	38.749	13.9049	10.83	19.9095	12.437	5.8906	6.67323	6.79511
475	49.389	47.932	44.844	56.679	33.586	25.251	25.169	27.322	18.871	17.992	21.114	18.498	9.366	5.66	12.653	7.668	7.481	4.559	3.806	2.832	7.271	14.865	12.935	19.747	12.797	21.407	9.128	9.217	25.602	16.819	25.579	26.195	17.221	25.481	25.472	18.078	38.7715	13.9778	10.77	19.8792	12.4213	5.89719	6.6034	6.80468
476	49.445	47.857	44.592	56.186	33.075	26.012	24.703	27.637	18.764	17.893	20.597	18.156	9.621	6.055	12.929	7.553	7.465	4.601	3.833	2.714	7.206	15.136	13.132	20.248	13.356	22.491	9.204	9.231	25.584	16.833	25.195	25.993	16.449	25.928	25.848	18.022	38.6884	13.946	11.0182	19.8287	12.2516	5.65218	6.93325	6.84924
477	49.892	47.806	44.575	56.527	33.11	25.247	24.724	27.613	18.784	18.01	20.853	18.53	9.08	5.854	12.958	7.52	7.667	4.598	3.947	2.794	7.495	15.423	13.06	20.587	13.461	22.645	9.195	9.265	25.584	16.733	25.359	26.809	16.721	25.553	25.255	18.435	38.6868	13.9486	11.1677	19.8909	12.4841	5.85625	6.98062	6.83501
478	49.491	48.154	44.677	56.385	33.811	25.607	24.913	27.578	18.879	17.675	20.852	18.248	9.322	5.76	12.684	7.482	7.796	4.658	3.983	2.793	7.505	15.279	13.31	20.909	13.734	22.612	9.285	9.348	25.824	16.693	25.684	26.726	16.536	26.436	26.284	18.877	38.827	13.8628	11.2579	20.1693	12.3247	5.80828	7.01409	7.02822
479	49.787	47.675	44.482	56.416	34.257	25.672	24.791	27.604	18.625	18.123	20.774	18.567	9.437	5.762	12.928	7.46	7.806	4.616	4.011	2.827	7.548	15.312	13.101	20.943	13.629	22.904	9.27	9.351	25.756	16.853	25.521	26.518	17.239	26.481	25.735	18.689	38.8355	13.9595	11.2697	20.1413	12.2863	5.82761	7.05752	6.90065
480	49.841	48.295	44.772	56.566	33.604	26.173	25.009	28.008	18.827	18.144	21.151	18.5	9.414	5.713	12.95	7.859	7.998	4.682	4.017	2.904	7.848	15.362	13.56	21.506	13.782	22.709	9.268	9.3	25.79	16.865	25.736	26.892	17.183	26.346	25.906	18.316	39.0335	14.0697	11.4368	20.1602	12.2825	5.85955	7.08724	6.9848
481	49.699	48.564	44.718	56.752	34.299	25.173	24.576	27.763	18.823	17.95	20.892	18.584	9.206	5.905	12.924	7.586	8.011	4.684	3.991	2.915	7.899	15.662	13.6	21.824	13.539	23.029	9.205	9.272	25.721	16.877	25.581	26.69	17.051	25.879	25.455	18.587	38.943	13.9837	11.5154	20.0318	12.5433	5.83319	7.20398	6.87193
482	49.122	48.021	44.475	56.202	33.671	25.866	25.255	27.415	18.659	17.972	20.699	18.482	9.332	6.07	12.989	7.073	8.033	4.665	4.099	2.89	7.958	15.65	13.527	21.652	14.221	23.697	9.139	9.251	25.639	16.745	25.64	26.544	16.857	26.694	26.03	19.029	38.7534	13.9095	11.6392	20.1568	12.1495	5.80718	7.30724	7.01011
483	49.036	47.394	44.307	55.212	33.477	26.054	24.39	27.514	18.516	17.615	20.702	18.358	9.503	5.893	12.776	7.442	8.171	4.61	4.099	2.809	8.096	15.959	13.424	21.928	13.693	23.158	9.236	9.294	25.467	16.452	25.344	26.813	16.694	26.049	26.404	18.129	38.423	13.8506	11.5947	19.9882	11.9702	5.70269	7.25263	6.99178
484	48.909	47.653	43.964	55.843	32.95	25.316	24.809	27.65	18.589	17.664	20.448	18.352	9.542	5.693	13.109	7.32	8.057	4.624	4.049	2.812	8.018	15.67	13.588	21.279	13.585	22.771	9.142	9.151	25.441	16.576	25.196	26.67	16.316	25.729	25.114	18.296	38.3867	13.8396	11.4453	19.7631	12.1446	5.72078	7.07882	6.8581
485	48.953	47.799	43.849	55.483	33.869	25.227	24.577	27.114	18.483	17.686	20.733	18.346	8.926	5.517	12.359	7.441	8.254	4.687	4.059	2.803	8.105	15.247	13.575	21.237	13.574	23.193	9.208	9.204	25.345	16.638	25.455	26.232	16.444	25.52	25.803	18.246	38.3589	13.6864	11.4734	19.8095	12.1521	5.86196	7.09978	6.83936
486	48.828	47.675	44.043	55.233	33.257	25.677	24.421	27.388	18.615	17.588	20.405	18.317	9.048	5.705	12.922	7.524	8.23	4.651	4.066	2.836	8.123	15.335	13.762	21.802	13.462	23.016	9.13	9.204	25.219	16.485	25.12	25.954	16.459	25.674	25.563	17.747	38.3152	13.7655	11.5283	19.6555	12.041	5.7299	7.16279	6.79491
487	48.984	47.073	43.604	55.083	32.72	25.379	24.312	26.962	18.516	17.704	20.466	18.017	9.208	5.869	13.301	7.183	8.239	4.594	4.105	2.857	8.033	15.58	13.338	21.116	12.777	23.119	9.121	9.121	25.166	16.435	25.256	25.683	16.889	25.007	24.825	17.713	38.0146	13.783	11.3758	19.5216	12.0864	5.70362	7.06088	6.64158
488	48.721	46.825	43.733	54.895	33.717	24.845	24.786	26.734	18.374	17.573	20.43	18.177	9.069	5.597	12.855	7.232	8.406	4.606	4.117	2.78	8.436	15.84	13.361	21.356	13.606	23.126	8.969	9.127	25.189	16.333	24.998	25.799	16.537	24.977	25.564	17.845	38.032	13.6634	11.5634	19.5338	11.9765	5.75482	7.11832	6.74189
489	48.484	46.963	43.636	54.753	32.931	24.703	24.021	26.309	18.35	17.573	20.753	18.32	9.104	5.424	12.356	6.871	8.358	4.693	4.174	2.802	8.218	15.393	13.344	21.25	13.843	23.46	8.93	9.152	25.261	16.472	25.075	25.766	16.22	25.466	25.752	17.628	37.725	13.5939	11.5535	19.5722	12.1695	5.92427	7.13696	6.83454
490	48.78	46.92	43.449	54.769	33.139	25.099	24.218	26.723	18.15	17.685	20.465	18.347	9.238	6	13.139	7.35	8.479	4.584	4.123	2.797	8.384	15.541	13.718	21.171	13.636	23.006	9.026	9.096	25.111	16.421	25.005	25.839	16.136	25.397	25.067	17.708	37.8871	13.7967	11.5439	19.4806	12.0341	5.64174	7.05957	6.74693
491	48.349	46.661	43.324	54.523	32.513	25.3	24.355	26.883	18.398	17.466	20.317	18.384	9.053	5.58	12.99	6.967	8.445	4.689	4.234	2.787	8.334	15.888	13.704	21.156	13.791	23.138	8.873	9.103	25.104	16.578	25.065	25.491	16.691	25.283	25.212	16.774	37.7385	13.6444	11.6166	19.4174	11.8568	5.79803	7.08961	6.74255
492	48.367	46.743	43.521	54.662	32.612	24.949	23.717	26.721	18.38	17.528	20.35	18.075	9.196	5.675	12.824	7.238	8.572	4.567	4.277	2.751	8.27	15.328	13.619	21.906	13.648	23.879	8.879	8.995	25.126	16.237	25.229	25.781	17.176	25.191	25.781	17.634	37.6615	13.6582	11.6817	19.6029	12.0812	5.69607	7.3086	6.81785
493	48.352	46.602	43.469	54.717	32.893	25.181	24.239	26.659	18.313	17.382	20.109	18.123	9.433	5.924	13.17	7.559	8.83	4.668	4.355	2.846	8.473	15.457	13.726	21.606	13.79	23.497	8.94	9.022	25.067	16.125	25.42	26.195	16.618	25.348	25.015	17.473	37.764	13.7516	11.7248	19.5223	11.9432	5.5048	7.1517	6.836
494	48.568	46.936	43.236	54.673	31.882	24.218	24.09	26.615	18.337	17.493	20.368	18.239	9.045	5.25	12.457	6.955	8.753	4.666	4.358	2.901	8.753	15.793	13.495	21.892	13.806	24.085	8.902	9.067	25.108	16.336	25.092	26.229	16.659	25.582	24.828	17.401	37.5272	13.518	11.8502	19.5204	12.2219	5.86515	7.3001	6.80708
495	48.328	46.406	43.384	54.14	32.482	24.633	23.692	26.22	18.243	17.302	20.171	17.963	9.041	5.753	13.109	7.083	8.911	4.738	4.429	2.771	8.534	16.434	13.676	21.37	13.782	24.229	8.92	9.139	25.001	16.299	25.109	26.385	16.003	24.958	25.649	17.529	37.4106	13.5831	11.8874	19.4992	12.0514	5.63847	7.3003	6.85056
496	47.901	46.745	43.573	53.935	32.844	24.971	23.898	26.658	18.256	17.527	20.263	18.005	9.42	5.709	12.842	7.281	8.945	4.693	4.496	2.93	8.915	15.636	13.568	22.083	13.976	24.293	8.948	9.073	24.996	16.258	24.988	26.054	16.345	25.616	24.665	17.328	37.5656	13.6629	11.9535	19.4271	11.8432	5.62027	7.327	6.77051
497	48.123	47.007	43.42	54.533	32.373	24.644	24.097	26.348	18.352	17.666	20.449	18.334	8.916	5.675	12.495	7.376	9.039	4.725	4.527	2.907	9.298	16.066	14.061	22.776	14.27	25.096	8.988	9.107	24.97	16.48	25.142	26.009	16.535	26.051	25.863	17.296	37.5681	13.6579	12.2765	19.6441	12.0945	5.77076	7.60349	6.9009
498	47.789	46.477	42.859	53.746	32.576	24.251	23.805	26.082	18.041	17.288	20.207	18.007	8.99	5.783	12.551	7.013	9.224	4.645	4.562	2.977	9.003	16.152	14.446	22.078	14.337	25.081	8.996	8.988	25.051	16.43	25.129	26.418	16.52	25.61	25.68	17.631	37.1981	13.485	12.2505	19.6453	11.9288	5.64597	7.51485	6.89852
499	47.859	46.542	43.188	54.097	32.115	24.379	23.675	26.297	17.926	17.33	20.119	17.78	9.331	5.904	12.809	7.259	9.227	4.69	4.665	2.815	9.196	16.026	14.578	22.648	14.311	25.002	8.93	9.048	24.946	16.309	24.804	26.199	16.162	25.622	25.38	17.537	37.269	13.5572	12.3158	19.4937	12.0371	5.48855	7.57763	6.83836
500	47.937	46.434	42.815	54.02	31.932	24.376	23.605	26.808	18.142	17.377	20.377	18.09	9.359	5.745	12.964	6.747	9.213	4.736	4.607	2.882	9.012	16.336	13.938	22.693	13.953	25.305	8.929	9.078	24.895	16.448	24.952	26.679	16.398	26.606	26.144	17.516	37.2409	13.6001	12.2675	19.7645	11.9523	5.70762	7.63235	7.05175
501	48.187	46.683	43.001	53.941	32.478	23.955	23.766	26.014	18.071	17.364	20.381	17.923	9.25	5.688	12.471	7.244	9.261	4.694	4.7	2.997	9.402	16.954	14.399	23.053	14.263	25.658	8.907	9.04	24.809	16.244	24.939	26.972	16.52	26.089	25.321	17.449	37.2531	13.549	12.5381	19.629	12.1176	5.63158	7.76893	6.96055
502	47.495	45.703	42.574	53.459	32.432	24.78	23.356	26.608	17.877	17.351	19.926	18.074	9.241	5.764	12.622	7.327	9.455	4.669	4.653	2.852	9.331	16.361	14.783	23.017	14.592	25.426	8.733	9.03	24.747	16.192	24.872	26.546	16.542	26.111	25.799	17.293	37.0509	13.5227	12.5139	19.5865	11.663	5.517	7.72788	6.98774
503	47.559	45.998	42.317	53.063	31.816	23.648	23.658	25.831	17.947	17.03	19.805	17.815	9.528	5.705	12.573	6.656	9.515	4.644	4.694	2.872	9.471	16.251	14.789	22.955	14.423	26.187	8.803	8.931	24.706	16.124	24.87	26.865	16.232	26.367	25.901	17.423	36.7363	13.3824	12.5801	19.6222	11.8689	5.53865	7.83878	7.07643
504	47.816	46.061	42.876	53.091	31.924	24.629	23.796	25.295	17.942	17.267	20.076	17.952	8.86	5.69	12.589	6.881	9.687	4.694	4.711	2.967	9.484	16.821	14.569	22.549	14.255	26.436	8.883	8.955	24.624	16.184	24.932	27.03	16.246	26.099	25.556	17.837	36.936	13.4071	12.6173	19.6346	11.8482	5.65791	7.82147	6.99818
505	47.362	45.733	42.614	53.606	31.95	24.616	23.749	25.6	18.074	17.184	19.832	17.866	8.974	5.556	12.488	6.84	9.611	4.699	4.69	2.97	9.522	16.963	14.124	22.957	14.616	25.469	8.792	8.887	24.608	16.082	25.194	26.825	16.391	25.983	25.38	17.374	36.9038	13.3518	12.5621	19.5516	11.8035	5.63719	7.70588	7.00723
506	47.438	45.871	42.722	53.12	31.662	23.579	23.828	25.98	17.821	16.912	19.975	18.073	8.974	5.957	12.76	6.495	9.731	4.693	4.751	2.798	9.707	16.359	14.605	22.712	14.416	25.95	8.752	8.853	24.589	16.101	24.787	26.567	16.319	25.847	24.943	17.231	36.775	13.3709	12.5722	19.3989	11.8526	5.60633	7.7368	6.90652
507	47.682	45.832	42.554	52.609	32.08	24.068	23.522	24.781	17.887	17.091	19.884	17.806	8.982	5.657	12.653	6.723	9.802	4.676	4.788	2.843	9.628	16.599	14.477	22.912	14.713	26.538	8.724	8.873	24.486	16.176	24.68	26.446	16.335	25.86	25.404	17.45	36.641	13.3354	12.6976	19.4434	11.8802	5.60346	7.88929	6.90844
508	47.353	46.129	42.394	53.055	31.783	23.373	23.778	25.874	17.848	17.204	19.871	18.185	9.12	5.697	12.34	6.52	9.906	4.583	4.836	3.008	9.907	16.606	14.404	22.547	13.905	26.605	8.709	8.86	24.523	16.065	24.504	26.536	16.496	25.352	25.078	17.498	36.7174	13.3481	12.6307	19.3621	11.8819	5.67093	7.79706	6.82668
509	47.926	45.757	42.509	52.59	32.257	23.711	23.072	25.627	17.916	17.084	19.689	17.77	8.763	5.534	13.065	6.574	10.058	4.675	4.911	2.857	9.818	17.034	15.13	22.968	14.315	26.786	8.793	8.849	24.399	15.862	24.603	26.655	16.268	25.685	25.003	16.756	36.6811	13.2994	12.8552	19.2873	11.8988	5.63935	7.94525	6.901
510	47.191	45.65	42.165	52.258	32.198	23.664	23.323	25.634	17.594	17.095	20.072	17.649	8.932	5.686	13.256	6.774	10.033	4.692	4.946	3.011	10.042	16.789	14.676	22.86	14.429	26.508	8.702	8.85	24.243	16.124	24.827	26.829	16.044	25.292	25.174	16.991	36.5104	13.3822	12.7986	19.3076	11.6705	5.57037	7.8153	6.90905
511	47.074	45.919	41.958	52.429	32.167	23.815	23.253	25.196	17.717	16.78	19.912	17.852	8.981	5.65	12.572	6.669	10.215	4.664	4.962	2.915	10.135	16.23	14.509	22.546	14.385	26.832	8.609	8.804	24.348	15.971	24.804	26.595	15.966	24.977	25.305	16.851	36.4764	13.2666	12.7393	19.223	11.7534	5.57708	7.80434	6.91119
512	47.062	45.629	42.451	52.633	31.88	23.435	22.574	25.304	17.667	17.029	19.714	17.563	8.687	5.53	12.717	6.709	10.28	4.623	5.054	2.845	10.224	16.895	15.063	22.886	14.43	27.34	8.739	8.731	24.559	15.787	24.741	26.47	15.892	25.345	25.067	17.133	36.371	13.202	12.964	19.2464	11.9629	5.57604	8.00256	6.91482
513	46.993	45.643	42.128	52.518	31.061	23.408	23.079	25.456	17.65	16.9	19.884	17.928	8.904	5.051	12.385	6.65	10.316	4.772	5.092	2.926	10.4	16.393	14.73	22.28	14.729	26.923	8.672	8.815	24.396	15.971	24.636	26.43	15.798	24.956	25.294	17.033	36.2858	13.169	12.8561	19.2001	11.8602	5.71893	7.76704	6.86758
514	46.951	45.169	41.872	52.216	31.317	23.46	23.121	25.192	17.716	16.939	19.778	17.945	8.963	5.534	13.083	6.504	10.413	4.76	5.148	3.03	10.593	17.123	14.842	23.213	14.862	27.511	8.689	8.763	24.283	15.946	24.691	26.554	16.663	25.217	25.368	17.051	36.1623	13.3078	13.1495	19.3225	11.7296	5.62693	8.02738	6.87364
515	47.623	45.757	42.46	52.51	31.957	24.516	23.505	25.473	17.528	17.195	19.843	17.594	8.914	5.742	13.14	6.731	10.39	4.7	5.162	3.152	10.853	16.599	14.406	22.648	14.583	27.52	8.678	8.77	24.257	15.976	25.016	26.431	16.752	25.358	25.582	17.328	36.7251	13.3359	13.0013	19.4148	11.6837	5.52687	7.88866	6.90623
516	46.695	45.383	41.897	51.873	30.76	23.583	23.08	25.858	17.699	16.929	19.855	17.905	9.199	5.207	12.823	6.741	10.484	4.67	5.156	2.857	10.615	16.922	15.003	23.381	14.653	27.055	8.684	8.727	24.215	15.813	24.883	26.418	16.211	25.036	25.4	16.474	36.1411	13.2947	13.0796	19.1861	11.5907	5.63481	7.98044	6.91335
517	46.978	44.818	41.592	52.066	31.687	23.402	23.371	25.654	17.629	17.15	19.687	18.046	8.923	5.249	12.874	6.777	10.614	4.709	5.174	3.195	10.632	16.403	15.161	22.84	14.599	28.252	8.705	8.723	24.175	15.94	24.803	27.215	16.265	25.465	25.412	17.074	36.196	13.2919	13.1579	19.3777	11.5338	5.65165	8.06524	7.00462
518	47.104	45.349	42.524	52.375	31.331	23.39	23.158	25.138	17.442	16.728	19.581	17.793	9.221	5.684	12.869	6.981	10.656	4.689	5.229	2.898	10.633	17.2	15.377	23.227	15.155	27.773	8.697	8.803	24.186	15.983	24.852	27.303	15.998	25.342	25.595	16.544	36.2961	13.2874	13.2837	19.3303	11.8588	5.38916	8.11426	7.04731
519	46.91	45.083	41.542	51.862	31.362	23.57	22.695	25.532	17.432	16.559	19.594	17.735	9.212	5.681	12.665	6.715	10.723	4.789	5.239	2.989	10.743	16.785	14.876	23.261	14.648	28.212	8.605	8.696	24.162	15.775	24.532	27.107	16.19	25.941	25.327	17.185	36.0695	13.1991	13.2265	19.352	11.6277	5.41721	8.13015	7.03769
520	47.048	45.088	41.579	51.601	31.112	23.757	23.227	25.321	17.408	16.801	19.414	17.838	9.236	5.625	13.443	6.999	10.74	4.734	5.395	3.051	10.625	17.427	15.699	23.751	15.657	28.531	8.603	8.768	24.235	15.669	24.268	26.856	16.255	25.207	25.61	16.837	36.0916	13.3455	13.561	19.2308	11.5268	5.37501	8.32323	6.94951
521	46.841	44.662	41.583	51.523	31.294	23.281	23.166	25.303	17.266	16.641	19.727	17.704	9.203	5.536	12.923	6.721	10.889	4.762	5.377	3.19	10.995	17.171	15.325	23.512	14.802	28.166	8.71	8.768	24.032	15.838	24.45	26.972	15.844	25.604	25.438	17.189	35.9566	13.2151	13.4189	19.2845	11.5123	5.45142	8.13424	6.96534
522	46.774	45.2	41.526	51.545	31.573	23.14	22.826	25.471	17.452	16.872	19.673	17.732	8.781	5.535	12.985	7.038	10.946	4.749	5.48	3.145	10.911	16.991	15.228	23.633	15.178	28.295	8.652	8.789	24.183	15.85	24.549	26.733	16.255	25.553	25.774	16.903	36.0069	13.2585	13.4556	19.3241	11.6023	5.48075	8.17103	6.9796
523	46.554	44.907	41.373	51.279	31.108	23.152	22.776	25.355	17.409	16.661	19.38	17.6	8.838	5.557	12.714	6.927	11.044	4.763	5.579	2.965	10.942	16.966	15.409	23.09	15.271	28.328	8.657	8.726	24.115	15.661	24.508	26.795	16.231	25.859	25.158	16.484	35.813	13.1358	13.4357	19.2194	11.5261	5.40162	8.11877	6.98751
524	46.642	44.983	41.607	51.315	30.699	23.309	22.364	25.173	17.401	16.8	19.539	17.928	8.815	5.532	13.125	6.616	11.098	4.767	5.572	3.164	11.12	17.642	15.728	23.304	14.926	28.493	8.678	8.846	24.145	15.756	24.56	27.554	16.303	25.599	25.759	16.639	35.7615	13.2195	13.5814	19.3839	11.6607	5.5359	8.18115	7.08152
525	46.637	44.36	41.404	51.4	31.407	23.244	23.013	24.392	17.375	16.701	19.619	17.837	9.169	5.45	12.822	6.607	11.09	4.842	5.588	3.06	11.047	17.403	15.652	23.913	15.67	28.87	8.608	8.813	24.108	15.849	24.683	27.904	16.294	26.183	25.383	16.452	35.7321	13.1975	13.7135	19.4277	11.5638	5.50733	8.34775	7.17782
526	46.445	44.913	41.721	50.961	30.9	22.867	22.885	24.892	17.116	16.808	19.346	17.667	8.835	5.215	13.132	6.879	11.178	4.706	5.639	3.085	11.272	17.373	16.183	24.148	15.909	29.315	8.645	8.697	24.013	15.72	24.507	27.981	16.366	26.194	25.909	16.803	35.698	13.1248	13.8808	19.4835	11.5774	5.46166	8.4853	7.22009
527	45.927	44.389	41.089	50.376	30.474	22.997	22.337	25.178	17.074	16.543	19.415	17.354	9.046	5.326	13.004	6.689	11.206	4.869	5.519	3.018	11.097	17.759	15.83	23.882	15.256	28.628	8.562	8.661	23.767	15.744	24.248	27.313	16.168	26.214	25.257	16.387	35.3459	13.0564	13.7064	19.2321	11.3482	5.39295	8.31309	7.08144
528	46.234	44.331	40.885	50.968	30.596	22.657	22.193	25.197	17.178	16.543	19.373	17.448	8.877	5.145	12.933	6.559	11.234	4.795	5.511	3.074	11.149	18.351	15.892	23.641	15.163	28.596	8.581	8.661	23.88	15.486	24.489	27.757	15.581	25.788	25.414	16.69	35.3826	13.007	13.7406	19.2327	11.5485	5.48503	8.30752	7.16572
529	46.658	44.64	41.425	51.1	30.688	23.249	22.677	25.079	17.338	16.383	19.515	17.4	9.039	5.394	13.172	6.58	11.277	4.779	5.582	3.171	11.363	17.124	15.127	23.156	15.657	28.733	8.521	8.62	23.99	15.79	24.381	27.196	15.909	25.603	25.414	16.104	35.6895	13.1026	13.5969	19.1528	11.5418	5.43495	8.16884	7.08154
530	46.652	44.708	41.002	50.889	30.441	23.084	22.387	25.46	17.375	16.612	19.572	17.868	9.134	5.264	13.21	6.168	11.216	4.715	5.603	3.213	11.27	16.86	15.108	23.25	15.542	28.423	8.408	8.507	23.784	15.885	24.617	26.867	15.682	24.86	25.739	16.056	35.5779	13.1504	13.52	19.0405	11.5183	5.6113	8.1059	7.05327
531	46.096	44.56	40.838	50.513	30.914	22.731	22.585	24.468	16.879	16.596	19.36	17.691	8.905	5.327	12.991	6.68	11.266	4.678	5.592	3.094	11.439	17.188	15.089	23.656	15.908	27.995	8.414	8.593	23.636	15.551	24.205	26.963	15.572	25.33	25.142	16.781	35.3381	13.0536	13.5905	19.0187	11.4681	5.42476	8.11706	6.98191
532	45.878	43.926	40.753	50.195	31.093	23.152	22.054	25.037	17.131	16.479	19.394	17.524	9.095	5.578	13.206	6.378	11.207	4.64	5.669	3.032	11.319	17.41	15.857	23.805	15.7	28.727	8.455	8.614	23.731	15.535	24.139	26.748	15.415	25.663	25.13	16.623	35.261	13.0981	13.7366	19.0053	11.2373	5.40727	8.31729	6.995
533	46.103	44.352	40.908	50.124	31.139	22.64	22.496	24.98	17.157	16.371	19.41	17.74	8.932	5.253	13.098	6.567	11.47	4.704	5.715	3.161	11.38	17.061	15.526	22.822	15.429	28.455	8.524	8.617	23.746	15.522	24.124	26.671	15.468	25.213	24.886	16.63	35.3428	13.066	13.5723	18.9401	11.3255	5.47883	8.05876	6.90069
534	45.978	43.895	40.503	50.089	30.604	22.899	22.256	24.457	16.909	16.305	18.812	17.074	9.046	5.634	13.049	6.498	11.348	4.836	5.733	3.088	11.371	16.881	15.966	23.41	15.351	28.235	8.385	8.641	23.556	15.462	24.446	26.789	15.943	25.133	25.145	16.43	35.0851	12.9159	13.6219	18.993	11.3192	5.19194	8.09034	6.95153
535	45.834	43.671	40.788	49.859	30.309	22.243	22.263	23.754	16.875	16.36	18.968	17.453	9.222	5.663	13.26	6.296	11.417	4.84	5.861	3.105	11.542	17.391	15.556	22.999	15.398	28.356	8.411	8.637	23.634	15.455	23.995	27.257	15.254	25.822	25.005	16.422	34.8401	13.0121	13.6465	18.9892	11.4648	5.27618	8.05029	7.07079
536	45.938	44.375	40.547	50.036	30.832	22.184	22.033	24.656	17.028	16.252	19.295	17.522	8.836	5.06	12.914	6.739	11.41	4.783	5.821	3.034	11.554	17.516	15.852	23.597	15.699	28.064	8.438	8.563	23.64	15.578	24.196	26.751	16.101	25.392	25.422	16.488	35.0751	12.9558	13.733	19.0569	11.4711	5.43073	8.11485	6.97284
537	46.103	43.87	40.711	50.176	30.621	22.418	22.005	24.483	17.099	16.394	19.039	17.536	8.945	5.553	12.985	6.921	11.59	4.802	5.885	3.156	11.409	18.128	16.315	23.767	16.108	29.012	8.426	8.628	23.683	15.522	24.31	27.231	15.805	26.647	26.091	16.593	35.0484	13.059	14.0172	19.2936	11.4756	5.26706	8.35441	7.2515
538	45.644	43.971	40.699	49.968	30.034	21.897	21.967	24.549	16.982	16.723	19.5	17.576	8.932	5.291	12.895	6.628	11.574	4.736	5.808	3.096	11.637	17.894	16.296	23.578	15.585	28.499	8.505	8.541	23.663	15.599	24.093	27.595	15.751	25.308	25.6	16.537	34.8411	13.0659	13.8703	19.1192	11.4986	5.47022	8.21945	7.0906
539	45.621	43.463	40.355	49.8	31.056	22.978	21.912	24.219	16.812	15.968	18.862	17.266	8.863	5.464	12.903	6.408	11.383	4.778	5.827	2.945	11.462	18.258	16.001	23.693	15.494	28.339	8.38	8.599	23.549	15.346	24.26	27.768	15.691	26.081	25.499	15.946	34.9255	12.8182	13.818	19.1119	11.2104	5.25096	8.23909	7.2425
540	45.801	43.466	40.451	49.185	30.363	22.597	21.765	24.016	16.898	16.08	18.797	17.144	8.839	5.643	13.035	6.371	11.425	4.761	5.888	2.915	11.473	17.406	16.165	23.163	15.28	28.312	8.298	8.44	23.434	15.438	24.228	27.379	15.651	26.013	25.489	16.098	34.7055	12.8509	13.6788	19.0468	11.274	5.21899	8.11546	7.20215
541	45.749	43.697	40.533	49.765	30.145	21.884	21.775	24.284	16.95	16.366	19.188	17.326	8.841	5.072	12.899	6.598	11.563	4.649	5.934	2.917	11.996	17.786	15.906	22.651	15.092	28.248	8.247	8.41	23.348	15.099	24.317	26.983	15.692	25.639	25.411	16.207	34.729	12.905	13.6742	18.9353	11.4925	5.41179	8.03625	7.1319
542	45.793	43.574	40.513	49.485	30.013	21.671	21.405	24.061	16.699	16.013	19.007	17.393	8.632	5.01	12.725	6.327	11.418	4.678	5.917	2.897	11.705	17.433	15.931	23.109	15.966	28.228	8.293	8.494	23.236	15.046	24.337	26.87	14.921	25.439	24.955	16.425	34.5644	12.7258	13.7282	18.8016	11.5617	5.41249	8.10689	7.06173
543	45.269	42.803	40.501	49.762	30.011	22.119	22.047	24.404	16.734	16.092	18.851	16.859	8.471	5.454	12.562	6.167	11.587	4.674	5.815	3.016	11.792	17.056	15.859	23.035	15.378	27.639	8.309	8.451	23.233	15.038	24.005	26.708	15.395	25.574	25.612	15.814	34.6145	12.6487	13.5851	18.8139	11.2389	5.29121	7.92984	7.09769
544	45.176	43.244	40.684	49.003	29.94	21.892	21.88	23.797	16.558	16.072	18.655	17.068	8.675	5.349	12.699	6.222	11.63	4.692	5.865	2.748	12.014	17.908	15.973	23.434	15.614	28.591	8.29	8.376	23.237	15.125	23.996	27.372	15.393	25.013	25.025	15.767	34.452	12.6622	13.8469	18.7594	11.292	5.25067	8.24903	7.07839
545	45.567	42.952	40.017	49.641	30.076	21.992	21.558	24.047	16.534	15.808	18.834	17.088	8.916	5.12	13.04	5.912	11.723	4.755	5.927	2.713	11.818	17.892	15.468	23.489	15.33	28.132	8.252	8.44	23.386	14.718	24.074	27.573	15.654	26.267	25.892	16.306	34.4812	12.6565	13.7247	19.0562	11.3791	5.33442	8.13807	7.32255
546	45.525	43.321	40.368	49.085	29.906	21.995	21.641	23.548	16.71	16.015	18.89	17.187	8.926	5.23	12.916	6.286	11.625	4.663	6.016	2.859	11.895	17.232	16.368	22.649	15.103	27.964	8.238	8.354	23.299	15.101	23.911	27.14	16.03	25.932	24.929	15.5	34.4236	12.77	13.6374	18.8434	11.3971	5.30107	7.9643	7.1278
547	45.146	42.592	39.63	48.336	30.495	22.166	21.849	23.671	16.6	15.874	18.897	17.111	8.822	5.404	13.074	6.591	11.636	4.807	6.002	3.018	11.592	18.001	15.757	22.696	15.74	28.478	8.292	8.396	23.199	15.044	23.645	26.77	15.135	25.797	25.13	16.148	34.2356	12.7966	13.7727	18.7556	10.9642	5.1934	8.07816	7.05996
548	45.403	43.269	40.112	48.973	30.534	22.531	21.542	24.461	16.664	16.025	18.716	17.125	8.91	5.025	13.365	6.027	11.777	4.712	6.044	2.928	11.815	17.799	16.103	22.396	15.209	27.332	8.188	8.498	23.196	15.287	24.023	26.601	15.6	25.094	24.864	15.838	34.6031	12.7321	13.6115	18.7189	11.1119	5.35556	7.80963	6.94327
549	45.493	43.021	40.131	48.796	29.84	21.611	21.737	24.044	16.554	16.143	19.01	17.263	8.786	5.133	12.735	6.622	11.611	4.844	5.943	3.282	11.797	17.969	15.934	23.088	16.279	27.859	8.266	8.47	23.032	15.331	24.115	27.157	15.623	25.414	25.581	16.027	34.3341	12.7808	13.8606	18.9016	11.2718	5.30249	7.98151	7.09548
550	45.223	42.964	39.579	48.958	29.321	21.634	21.714	23.658	16.657	16.055	18.972	17.469	8.997	5.166	13.236	6.124	11.629	4.689	6.002	3.102	11.696	17.539	15.242	22.912	15.721	27.961	8.184	8.403	23.246	15.182	24.086	27.256	15.183	25.401	25.341	15.889	34.1314	12.8345	13.6493	18.8171	11.2995	5.38324	7.96165	7.15706
551	45.419	43.136	40.001	48.944	30.02	22.273	21.891	23.017	16.641	16.048	18.973	17.344	8.927	5.667	13.211	6.172	11.813	4.754	6.12	3.043	11.663	18.083	16.046	23.283	15.59	27.906	8.195	8.334	23.054	15.095	23.968	27.165	15.566	25.756	24.549	16.509	34.3376	12.8729	13.8301	18.8191	11.2941	5.26434	8.0314	7.05257
552	44.97	42.883	39.647	48.893	30.328	22.511	22.13	22.808	16.653	16.001	18.987	17.249	8.993	5.499	13.126	6.007	11.746	4.772	6.044	3.183	11.795	17.978	15.989	22.779	15.71	27.742	8.273	8.406	22.99	15.18	23.929	27.038	15.371	25.22	24.884	15.791	34.2713	12.8144	13.7738	18.7082	11.1098	5.30784	7.91279	7.01304
553	44.957	43.288	40.007	48.898	29.351	20.692	20.649	24.014	16.843	15.959	19.243	17.291	8.724	5.039	12.602	6.272	11.742	4.768	6.053	3.282	11.985	17.717	15.732	22.632	15.679	28.076	8.196	8.335	23.07	15.189	24.379	26.673	15.709	25.279	24.692	16.335	33.982	12.7466	13.7666	18.7857	11.5946	5.44432	7.91731	6.98144
554	45.017	42.594	39.563	48.641	30.25	21.576	21.576	24.254	16.399	16.064	18.661	17.378	8.728	5.334	13.087	6.79	11.758	4.796	6.094	2.994	11.6	18.003	16.088	22.425	16.042	27.398	8.211	8.3	22.954	15.171	23.859	27.562	15.654	25.095	25.163	15.423	34.1839	12.8051	13.7198	18.7392	11.0714	5.17467	7.84143	7.12233
555	44.935	42.627	39.564	48.483	29.64	21.303	21.775	23.829	16.527	15.949	18.869	17.186	9.313	4.892	12.889	6.408	11.799	4.755	6.129	2.938	11.763	17.601	16.087	22.859	15.923	27.369	8.191	8.388	23.112	15.254	23.744	27.265	14.75	25.342	25.057	16.082	34.0195	12.7541	13.7223	18.7185	11.1345	5.28368	7.86766	7.10163
556	45.211	42.871	39.435	48.413	29.346	21.765	21.851	22.862	16.473	16.023	18.611	17.449	8.579	5.326	12.66	6.058	11.776	4.832	6.128	3.244	11.921	17.715	16.246	22.657	15.647	27.258	8.232	8.396	22.939	15.271	24.092	26.55	15.802	25.11	24.692	15.579	33.9693	12.6474	13.7424	18.6663	11.2419	5.32145	7.76455	6.92254
557	45.156	42.977	39.216	48.223	29.813	21.228	21.12	22.517	16.678	15.821	18.603	17.145	8.586	5.108	12.878	5.885	11.845	4.752	6.149	3.214	11.872	17.67	16.005	22.278	15.688	26.855	8.191	8.388	23.002	15.13	23.871	27.21	14.977	24.561	24.494	15.274	33.7812	12.588	13.6328	18.5098	11.4178	5.36001	7.64083	6.99481
558	44.413	42.782	38.991	48.035	29.571	21.565	21.225	23.556	16.521	15.996	18.692	17.403	8.845	5.33	12.72	6.654	11.818	4.761	6.176	3.157	11.906	17.837	15.293	22.425	15.846	26.725	8.185	8.402	22.873	14.993	23.707	26.382	14.794	24.658	25.036	15.568	33.7672	12.7701	13.5944	18.4598	11.0424	5.19861	7.63293	6.92808
559	45.006	42.599	39.066	48.233	29.338	21.649	21.324	23.762	16.333	15.728	18.638	17.097	8.855	5.41	13.162	6.317	11.874	4.845	6.187	3.126	11.899	17.519	15.587	23.096	15.791	27.194	8.273	8.347	22.794	15.314	23.805	26.928	15.477	25.557	25.189	15.679	33.8721	12.6925	13.7118	18.7363	11.1032	5.1526	7.78983	7.04368
560	45.045	42.367	39.306	48.249	29.355	21.187	21.282	23.096	16.459	16.01	18.744	17.365	9.104	5.494	13.251	6.157	11.855	4.692	6.154	3.142	11.957	18.194	16.457	22.462	15.878	27.093	8.099	8.314	22.852	15.145	23.864	27.291	15.773	25.326	24.569	15.286	33.7359	12.823	13.7884	18.6519	11.2696	5.22671	7.77894	7.06437
561	44.688	42.917	39.109	47.378	29.058	20.767	20.952	23.749	16.4	15.964	18.562	17.171	8.846	5.462	13.084	6.216	11.801	4.749	6.218	3.286	12.006	17.382	16.281	22.982	16.042	27.061	8.116	8.336	22.809	15.081	23.853	26.968	15.452	25.68	24.605	15.921	33.5772	12.7131	13.7808	18.6821	11.1628	5.18414	7.75556	7.04104
562	44.754	42.081	38.647	47.753	29.158	21.369	21.556	23.185	16.222	15.688	18.408	17.137	8.575	5.451	12.95	5.989	11.891	4.772	6.225	3.179	11.976	18.124	16.687	23.272	15.94	27.144	8.149	8.317	22.797	15.151	23.833	27.645	15.318	25.078	24.981	15.291	33.5629	12.5525	13.921	18.656	10.9868	5.18363	7.87336	7.13397
563	44.64	42.2	39.026	47.723	29.537	21.576	21.184	23.108	16.397	15.691	18.605	17.223	9.516	5.53	13.141	6.444	11.857	4.8	6.17	3.067	11.941	17.861	16.152	23.255	15.931	27.154	8.131	8.299	22.65	15.153	23.719	26.152	15.276	25.765	24.461	15.349	33.6242	12.8184	13.8188	18.4955	11.0199	5.05268	7.85941	6.94765
564	44.321	42.343	39.012	47.853	28.867	20.923	20.975	22.468	16.335	15.789	18.693	17.35	8.681	5.169	12.703	5.64	11.944	4.775	6.236	3.24	12.143	18.07	16.467	22.501	16.055	27.214	8.21	8.291	22.758	15.166	23.9	27.396	15.088	25.374	24.89	15.205	33.3453	12.545	13.8645	18.6278	11.274	5.38269	7.76317	7.13421
565	44.582	42.388	38.966	47.778	29.445	21.409	21.298	23.139	16.246	15.617	18.408	17.174	8.663	5.428	12.847	5.874	11.926	4.792	6.297	2.976	11.932	18.023	16.635	22.961	15.751	27.05	8.171	8.284	22.627	14.955	23.682	27.002	15.264	25.676	24.537	15.634	33.6256	12.5321	13.8343	18.5832	11.0473	5.1996	7.8227	7.04232
566	44.084	42.231	38.637	46.828	29.084	21.546	20.982	23.162	16.405	15.625	18.537	17.306	8.828	5.119	12.738	6.203	12.03	4.758	6.325	3.146	11.981	17.304	16.094	22.895	16.493	27.55	8.244	8.269	22.703	14.798	23.773	27.083	14.787	25.437	24.461	15.485	33.3192	12.5951	13.8576	18.504	10.81	5.23937	7.84661	7.06504
567	44.475	42.304	39.084	47.033	28.858	20.948	21.097	22.751	16.318	15.848	18.733	17.339	8.765	5.615	12.7	6.364	12.056	4.787	6.331	3.115	12.152	17.249	16.402	22.315	15.831	26.729	8.141	8.246	22.754	14.945	23.902	27.626	15.197	26.075	24.195	15.704	33.3188	12.7103	13.6967	18.6785	11.0873	5.16503	7.59602	7.17926
568	44.343	42.064	38.667	46.976	28.897	21.306	20.919	22.92	16.194	15.619	18.306	17.027	9.199	5.389	12.752	6.136	11.995	4.819	6.303	3.276	11.844	17.817	16.067	22.515	16.322	27.442	8.145	8.371	22.59	14.958	24.02	26.516	15.191	26.06	24.953	15.583	33.2615	12.5777	13.84	18.6387	10.947	5.06466	7.7773	7.08585
569	43.924	41.683	38.673	47.002	28.599	20.759	20.974	23.429	16.011	15.514	18.284	17.013	8.645	4.881	12.722	6.079	11.941	4.764	6.337	3.173	11.917	17.461	15.865	22.479	16.235	26.43	8.131	8.165	22.669	14.845	23.62	26.31	15.034	25.01	25.051	15.535	33.1304	12.3936	13.6602	18.437	10.8777	5.20071	7.56838	6.97885
570	44.243	41.813	38.5	47.236	28.567	20.845	21.374	23.317	16.083	15.585	18.468	17.005	8.791	5.419	12.652	6.315	12.024	4.827	6.334	3.108	11.868	17.693	16.531	22.776	15.987	26.814	8.138	8.191	22.552	15.12	23.724	27.09	15.393	25.901	24.24	15.343	33.2369	12.5397	13.7962	18.5692	10.9078	5.07697	7.70852	7.06999
571	44.044	41.51	38.444	46.503	28.986	21.073	20.837	22.984	15.883	15.593	17.99	17.196	8.668	5.04	13.003	6.066	12.022	4.801	6.352	3.194	11.989	17.886	16.737	22.826	15.674	26.979	8.115	8.159	22.336	14.636	23.616	27.091	15.52	25.814	24.124	15.447	33.0476	12.4299	13.846	18.4858	10.7767	5.14295	7.7413	7.05322
572	44.099	41.538	38.408	46.54	29.29	21.157	20.401	23.177	16.057	15.573	18.336	17.048	9.036	5.088	12.484	6.438	12.003	4.892	6.306	3.257	12.03	17.389	16.233	22.486	16.117	26.687	8.182	8.266	22.512	14.866	23.803	26.83	15.339	24.89	24.366	15.131	33.0763	12.5075	13.74	18.4185	10.8091	5.07829	7.59154	6.94843
573	43.439	41.497	38.096	46.767	29.195	20.805	20.796	22.557	15.769	15.632	18.003	16.92	8.814	5.349	12.763	6.488	11.895	4.851	6.414	3.045	11.709	18.076	16.539	22.946	16.02	26.384	8.082	8.267	22.558	14.761	23.476	27.001	15.125	25.995	24.962	15.243	32.894	12.4673	13.7879	18.547	10.8085	4.94604	7.68135	7.15412
574	43.754	41.47	38.147	46.513	29	20.699	20.971	22.715	15.92	15.489	18.319	16.972	9.068	4.932	12.68	6.002	12.03	4.814	6.365	3.184	11.933	17.952	16.219	22.892	16.422	26.403	8.078	8.148	22.425	14.95	23.769	26.667	15.078	25.679	24.842	15.289	32.9086	12.4227	13.8214	18.4925	10.785	5.15131	7.65076	7.08701
575	43.745	41.771	38.384	46.462	28.987	20.829	20.926	22.739	15.895	15.444	18.434	17.13	8.989	5.026	12.498	6.492	11.99	4.751	6.432	3.238	12.145	17.186	16.43	22.276	16.468	26.569	8.027	8.173	22.489	14.721	23.544	26.684	15.472	25.236	24.209	15.095	32.9804	12.4885	13.7485	18.365	10.8094	5.08675	7.55797	6.97209
576	43.844	41.917	38.236	46.504	29.199	21.523	21.039	22.707	15.942	15.556	18.184	17.055	8.916	5.504	13.16	6.075	12.057	4.737	6.502	3.279	12.124	17.756	16.406	22.535	15.83	25.781	8.106	8.177	22.472	14.903	23.713	26.489	15.115	24.995	24.088	15.195	33.1211	12.549	13.7007	18.3253	10.7034	5.03883	7.44047	6.91055
577	44.183	41.517	38.661	46.778	29.384	21.407	20.12	22.868	15.964	15.44	18.413	16.946	8.378	5.233	12.514	6.456	12.064	4.829	6.409	3.207	12.15	17.339	15.911	22.236	16.409	26.282	8.081	8.166	22.376	14.842	23.799	26.611	15.05	25.139	24.35	15.245	33.1148	12.418	13.6836	18.3659	10.9244	5.09411	7.48088	6.97803
578	44.225	41.219	38.425	46.342	28.311	20.839	20.393	22.499	15.836	15.519	18.137	17.181	8.867	5.212	12.883	6.351	12.124	4.794	6.438	3.185	12.119	17.736	16.77	22.53	16.645	25.958	8.156	8.114	22.458	14.806	23.464	27.367	15.797	25.179	24.209	15.098	32.7816	12.4983	13.8299	18.4648	10.9525	5.04553	7.52808	7.01992
579	43.831	40.984	37.968	45.9	29.041	20.906	20.486	22.646	15.851	15.387	18.153	16.783	8.556	5.334	12.733	6.385	12.085	4.759	6.407	3.064	11.967	18.039	16.205	22.56	16.496	26.235	8.051	8.195	22.279	14.647	23.514	26.425	14.834	25.472	24.398	14.95	32.7203	12.3978	13.7817	18.2765	10.6722	4.98763	7.60368	7.00305
580	43.501	41.037	37.886	45.737	28.957	20.342	20.637	22.66	15.762	15.348	17.915	17.064	9.035	5.152	12.833	6.43	11.954	4.781	6.482	3.19	12.124	18.015	16.075	22.232	16.535	25.848	8.025	8.128	22.391	14.609	23.529	27.234	15.276	25.697	24.616	15.374	32.5946	12.4424	13.7236	18.4879	10.6636	4.95455	7.4558	7.13773
581	43.402	41.157	37.972	46.154	28.735	20.184	20.648	21.982	15.674	15.419	18.29	16.874	8.807	5.29	12.818	5.919	12.125	4.845	6.421	3.184	12.212	17.739	16.344	22.692	16.335	26.055	7.996	8.188	22.332	14.666	23.459	26.55	14.794	25.189	24.373	14.763	32.5293	12.3864	13.7952	18.231	10.8702	5.07347	7.5302	7.00524
582	43.258	41.463	38.001	45.842	28.688	20.635	20.531	22.247	15.773	15.349	18.054	16.986	8.877	5.201	12.942	5.901	12.008	4.786	6.454	3.147	12.091	17.732	16.288	22.515	16.212	26.293	8.008	8.155	22.173	14.801	23.623	26.474	15.172	25.511	24.8	15.1	32.5831	12.3854	13.7526	18.3817	10.7436	5.06866	7.55944	7.03518
583	43.386	41.101	37.967	45.847	28.279	20.339	20.807	22.073	15.831	15.316	18.147	17.03	8.993	5.262	13.183	5.981	12.146	4.829	6.506	3.229	12.278	17.783	16.104	22.624	16.57	26.163	8.065	8.112	22.275	14.775	23.374	26.988	15.168	26.063	24.469	15.026	32.4749	12.4679	13.8232	18.4315	10.7681	5.05792	7.52792	7.12336
584	43.308	40.82	37.952	45.91	28.06	20.212	20.666	21.551	15.722	15.307	18.277	16.98	9.06	5.226	12.79	5.973	12.095	4.837	6.478	3.186	12.192	17.731	16.426	22.701	16.317	26.181	8.01	8.096	22.026	14.692	23.47	26.352	15.132	25.405	24.381	14.676	32.3099	12.4169	13.8144	18.224	10.8623	5.05795	7.55201	6.98444
585	42.917	41.019	37.572	45.328	29.128	20.151	20.311	22.073	15.625	15.139	17.866	16.963	8.864	5.29	13.164	6.015	12.066	4.787	6.459	3.111	11.981	17.825	16.528	22.563	16.675	26.032	7.884	8.11	22.195	14.632	23.435	27.012	15.856	25.212	24.593	15.245	32.3124	12.3658	13.8027	18.4174	10.6385	4.97133	7.5573	7.03774
586	42.929	40.9	37.619	45.357	28.24	20.193	20.704	21.958	15.649	15.225	17.804	16.87	8.908	5.226	12.885	6.079	12.093	4.752	6.522	3.073	12.075	17.829	17.182	22.757	16.517	25.962	7.989	8.097	22.211	14.676	23.226	26.24	15.352	24.943	23.707	15.083	32.2375	12.3308	13.8762	18.1524	10.6246	4.95022	7.59335	6.81781
587	42.953	40.934	37.639	45.796	28.728	20.178	20.971	22.787	15.577	15.128	18.049	17.09	8.78	5.016	12.936	5.961	12.117	4.873	6.539	3.064	12.083	17.324	16.339	22.397	16.213	25.178	7.996	8.164	22.106	14.681	23.371	26.139	14.859	25.891	24.275	14.818	32.4982	12.3171	13.6127	18.23	10.535	5.08167	7.31179	6.99919
588	42.736	40.558	37.507	45.246	28.847	20.25	20.713	21.955	15.436	15.161	18.062	16.863	8.881	5.334	12.825	6.051	12.046	4.786	6.43	3.186	11.979	17.805	16.392	22.738	16.906	25.584	7.881	8.068	22.005	14.681	23.3	25.967	14.98	25.644	24.466	14.739	32.2265	12.3266	13.7852	18.1731	10.4893	4.95085	7.49646	6.98691
589	42.96	40.726	37.255	44.956	28.336	20.405	21.018	22.452	15.477	15.117	17.994	16.915	9.081	4.96	12.89	6.165	12.107	4.806	6.481	3.052	12.326	17.467	16.544	22.55	16.514	25.414	8.038	8.078	22.039	14.679	23.17	27.305	15.14	25.624	24.925	15.386	32.2635	12.3249	13.7261	18.4384	10.3566	4.98523	7.41435	7.12986
590	43.414	40.767	37.488	45.379	28.085	20.226	20.84	21.889	15.685	15.289	18.043	16.807	8.981	5.472	12.651	5.911	12.128	4.826	6.524	3.118	12.321	18.125	16.574	22.284	17.021	25.69	7.869	8.05	22.013	14.472	23.457	26.883	14.758	25.283	24.29	14.995	32.261	12.3549	13.8611	18.207	10.6667	4.96046	7.47328	7.07574
591	42.797	40.589	37.303	45.334	27.939	19.432	19.926	22	15.571	15.322	17.827	16.869	9.102	5.119	12.583	6.067	12.175	4.785	6.553	3.21	12.301	17.57	16.828	22.458	16.578	25.353	7.97	8.08	22.004	14.442	23.222	26.635	15.043	25.734	24.732	14.805	31.915	12.3075	13.7811	18.2667	10.7997	4.95666	7.38131	7.09387
592	42.475	40.314	37.145	44.95	28.106	20.322	20.672	21.75	15.617	15.107	17.858	16.699	8.987	4.981	12.68	6.227	12.217	4.761	6.535	3.158	12.28	18.002	16.544	21.686	16.837	25.395	8.054	8.054	21.976	14.547	23.201	26.627	15.276	25.625	23.955	15.137	31.9668	12.2695	13.7415	18.2452	10.4056	4.93799	7.33	6.95758
593	42.919	40.318	37.499	45.012	28.402	20.486	19.855	21.91	15.45	15.105	18.264	16.871	8.735	5.249	12.957	5.77	12.135	4.859	6.607	3.327	12.041	17.713	16.346	21.937	16.316	24.973	7.913	8.092	21.827	14.535	23.281	26.704	15.361	25.582	24.363	14.938	32.0501	12.3001	13.6254	18.2596	10.5747	5.06743	7.19642	7.02264
594	42.782	40.027	37.251	44.86	28.233	20.075	20.267	22.477	15.527	14.926	17.996	16.906	9.079	4.956	12.741	5.916	12.091	4.824	6.579	3.281	12.152	18.039	16.736	22.716	16.547	25.866	7.947	8.083	21.861	14.413	23.053	26.667	14.793	25.634	24.462	15.174	31.9965	12.2559	13.8831	18.2087	10.4087	5.01729	7.51404	7.03724
595	42.48	40.073	37.16	45.014	27.661	19.745	20.087	21.738	15.382	15.039	17.819	16.897	8.903	5.065	12.666	5.943	12.151	4.906	6.574	3.171	12.111	17.653	16.603	22.058	16.274	24.904	7.847	7.967	21.824	14.52	23.091	26.173	15.324	25.709	24.321	14.836	31.7447	12.2142	13.6405	18.1612	10.6013	4.97083	7.22594	6.988
596	42.49	40.244	37.036	44.604	28.318	20.183	20.019	22.094	15.474	15.109	17.743	16.742	8.945	4.993	12.819	5.649	12.146	4.857	6.533	3.163	11.959	17.729	16.652	21.939	16.166	24.955	7.9	8.012	21.756	14.442	23.124	26.748	14.935	25.114	23.781	14.583	31.8735	12.1843	13.6099	18.0395	10.399	5.01951	7.23834	6.96342
597	42.445	40.145	37.204	44.977	27.649	19.971	20.173	21.755	15.527	14.876	17.95	16.826	8.925	4.856	12.716	6.221	12.173	4.85	6.637	3.196	12.012	17.753	16.389	21.641	16.583	25.171	7.856	8.104	21.748	14.408	23.13	26.5	15.19	24.859	24.095	15.095	31.7899	12.2371	13.6405	18.0985	10.5494	4.97646	7.22881	6.88623
598	42.625	40.149	37.032	44.604	28.064	19.998	20.635	22.218	15.309	15.125	17.991	16.919	9.006	5.415	12.616	5.937	12.098	4.784	6.583	3.286	12.032	17.592	17.156	21.79	16.427	24.888	7.898	8.094	21.703	14.57	23.329	26.778	15.285	25.305	23.855	14.579	31.9156	12.2897	13.6636	18.1396	10.3359	4.92222	7.21943	6.97321
599	42.292	40.201	37.306	44.545	28.097	20.056	20.477	22.135	15.344	14.75	17.706	16.802	9.037	5.342	12.799	6.035	12.121	4.791	6.614	3.131	12.001	18.021	16.752	22.338	16.852	25.192	7.798	7.991	21.663	14.573	23.274	27.436	14.907	25.242	23.931	14.946	31.8886	12.2269	13.7813	18.1761	10.3275	4.82965	7.38769	7.09055
600	42.287	40.055	36.897	44.429	27.471	19.795	20.146	21.719	15.537	15.087	17.879	16.812	9.078	5.212	12.546	5.843	12.135	4.834	6.609	3.203	12.196	17.849	16.994	22.174	16.421	24.637	7.822	7.99	21.775	14.442	23.013	26.59	15.442	25.333	24.253	14.948	31.5999	12.2493	13.7052	18.1608	10.4442	4.95815	7.23173	6.97689
601	41.97	40.198	36.924	44.462	27.326	19.745	20.27	21.722	15.333	14.939	17.801	16.925	8.996	5.051	12.81	5.853	12.061	4.821	6.622	3.246	12.097	17.889	16.285	21.791	17.04	25.386	7.838	7.964	21.695	14.504	23.289	26.694	15.229	25.685	23.992	15.088	31.5771	12.2135	13.7238	18.1978	10.4197	4.97197	7.30969	7.02497
602	42.51	40.238	37.124	44.449	28.51	19.771	19.8	21.602	15.449	15.121	17.792	16.98	8.748	5.176	12.742	5.778	12.04	4.929	6.616	3.276	11.992	17.189	16.415	21.376	16.561	24.762	7.829	7.944	21.649	14.645	23.324	26.235	14.399	25.228	24.097	14.446	31.7505	12.2233	13.5156	17.9796	10.5407	5.01414	7.07205	6.99456
603	42.305	40.017	36.778	44.502	27.438	19.701	20.896	21.574	15.441	14.884	17.884	16.712	8.801	4.998	12.123	5.974	12.093	4.867	6.612	3.205	12.077	17.474	16.491	22.129	16.896	25.072	7.861	7.94	21.643	14.505	23.198	26.545	14.742	24.913	23.902	14.558	31.6514	12.1021	13.6916	17.9807	10.3696	4.96399	7.27431	6.94908
604	42.354	39.986	37.351	44.246	27.813	19.626	19.936	21.23	15.46	15.01	17.828	17.053	8.995	5.245	12.529	5.937	12.036	4.761	6.591	3.086	12.143	17.849	17.016	21.56	16.558	24.516	7.75	7.865	21.564	14.611	23.366	26.783	15.37	25.326	24.318	14.808	31.5678	12.2571	13.6116	18.1761	10.5578	4.95265	7.17526	7.05759
605	42.26	39.818	37.117	44.326	27.168	19.933	20.147	21.796	15.368	15.089	17.701	16.909	8.689	4.839	12.857	6.145	12.111	4.88	6.684	2.986	11.888	17.826	16.843	21.515	16.538	23.954	7.795	7.909	21.534	14.314	23.071	27.061	14.703	24.668	24.172	14.446	31.5706	12.1996	13.5225	17.9673	10.3965	4.99177	7.05908	7.03885
606	42.163	39.66	37.026	43.965	27.547	19.868	20.142	21.279	15.266	14.884	17.788	16.903	8.906	5.33	12.302	6.153	12.151	4.777	6.671	3.142	12.01	17.535	16.64	21.81	16.546	24.328	7.845	7.982	21.558	14.453	23.129	25.647	14.707	24.903	24.15	14.484	31.4562	12.1915	13.561	17.8858	10.355	4.84873	7.116	6.84801
607	42.034	39.633	36.658	43.693	27.547	19.223	19.558	21.111	15.291	15.179	17.684	16.83	8.465	4.95	12.427	6.171	12.114	4.768	6.611	3.205	11.952	17.377	16.534	21.645	16.866	24.291	7.818	7.893	21.456	14.235	23.011	26.644	14.248	25.427	24.055	14.575	31.1821	12.1246	13.5363	17.9362	10.4777	4.96858	7.08951	7.06606
608	42.149	39.864	36.916	44.177	27.952	19.183	19.641	21.353	15.239	15.096	17.821	16.853	8.619	4.992	12.349	6.207	12.053	4.852	6.657	3.328	12.129	17.56	16.804	22.178	16.797	24.137	7.811	7.923	21.628	14.343	23.302	27.313	14.84	25.917	23.504	14.888	31.4044	12.147	13.6495	18.1469	10.5642	4.95066	7.1146	7.14274
609	42.037	39.457	36.457	43.968	27.078	19.204	19.836	21.113	15.235	14.876	17.643	16.947	9.23	5.15	12.344	5.466	12.141	4.871	6.647	3.029	12.004	17.443	16.152	22.137	16.475	24.011	7.858	7.912	21.554	14.293	22.922	26.023	14.295	24.806	23.177	14.297	31.1437	12.1114	13.491	17.7137	10.4747	4.96215	7.08409	6.82591
610	41.496	39.217	36.511	43.351	26.885	19.671	19.4	21.289	15.103	14.702	17.19	16.623	9.009	4.943	12.709	6.103	12.123	4.849	6.69	2.998	12.186	17.452	16.507	21.761	16.865	23.633	7.851	7.841	21.415	14.098	22.516	26.438	14.289	25.85	23.81	14.649	30.9775	12.0478	13.5064	17.8757	10.2452	4.76961	7.00821	7.031
611	41.645	39.375	36.686	43.677	27.561	19.072	20.08	21.389	15.09	14.593	17.365	16.626	9.022	4.969	12.814	5.992	12.144	4.775	6.709	3.057	12.2	17.513	16.818	21.613	16.894	24.092	7.755	7.802	21.412	14.14	22.79	26.046	14.329	25.257	23.667	14.366	31.1856	12.0589	13.5815	17.7564	10.2952	4.80311	7.0821	6.94463
612	41.606	39.327	36.572	43.409	27.5	19.635	20.21	20.504	15.227	14.561	17.465	16.534	9.071	5.231	12.326	5.903	12.062	4.769	6.686	3.167	11.96	17.347	17.001	21.064	16.402	23.691	7.758	7.887	21.321	14.145	22.934	26.442	14.682	24.68	23.352	13.862	31.0954	12.0397	13.4149	17.7063	10.2455	4.76687	6.91494	6.90579
613	41.861	39.351	36.198	43.342	27.534	19.315	19.667	20.803	15.036	14.792	17.43	16.812	9.033	5.405	12.642	5.723	12.089	4.852	6.669	3.118	11.945	17.637	16.649	21.183	17.065	24.022	7.856	7.87	21.24	14.172	22.987	26.083	14.485	25.398	23.7	14.431	31.0089	12.1091	13.5229	17.8222	10.3373	4.80576	7.01682	6.93519
614	41.482	39.138	36.468	43.332	27.043	18.963	19.835	20.809	15.084	14.901	17.349	16.828	8.878	4.843	12.58	5.777	12.119	4.809	6.74	3.351	12.371	18.049	16.756	20.984	16.599	23.687	7.802	7.9	21.256	14.323	23.04	26.47	14.234	24.28	22.987	14.07	30.8838	12.03	13.5465	17.6362	10.3305	4.92621	6.89668	6.83038
615	41.912	39.252	36.27	43.649	27.778	19.458	19.477	20.947	15.377	14.878	17.581	16.713	8.785	5.174	12.702	5.777	12.04	4.807	6.67	3.161	12	17.999	16.575	21.818	17.203	23.968	7.705	7.82	21.344	14.246	22.871	26.55	14.868	25.215	24.086	14.697	31.0929	12.1234	13.6241	17.9402	10.3669	4.91462	7.11428	7.00399
616	41.46	39.038	36.5	43.309	27.7	18.995	19.85	20.89	15.191	15.078	17.477	16.785	8.948	4.892	12.761	5.737	12.213	4.849	6.725	3.18	12.101	17.726	17.082	21.763	16.987	23.843	7.744	7.859	21.256	14.319	22.931	25.862	14.269	24.98	23.588	14.31	30.9677	12.1086	13.6469	17.7118	10.2631	4.95838	7.0612	6.87148
617	41.476	39.287	36.426	43.307	27.523	19.251	19.527	21.079	14.998	14.875	17.469	16.725	8.51	5.203	12.542	6.05	12.196	4.841	6.715	3.31	12.016	17.721	16.893	21.873	16.643	23.625	7.747	7.805	21.294	14.389	22.846	26.204	14.317	25.458	23.566	14.402	30.9845	12.0465	13.5833	17.8028	10.2783	4.83362	6.99614	6.96391
618	41.376	39.17	36.103	42.944	27.117	18.753	19.826	20.821	14.958	14.851	17.514	16.727	8.765	4.807	12.536	6.144	12.08	4.838	6.707	3.346	12.197	17.648	16.489	20.903	16.923	23.762	7.773	7.773	21.105	14.305	22.879	26.009	14.264	25.211	24.208	14.6	30.7638	12.0378	13.4893	17.8127	10.2553	4.87559	6.87961	6.96125
619	41.287	38.918	35.843	42.926	27.138	19.224	19.692	21.034	15.031	14.614	17.333	16.825	9.049	5.317	12.462	5.909	12.113	4.895	6.715	3.163	12.088	17.558	16.78	21.204	17.145	23.086	7.754	7.848	21.212	14.279	23.015	26.308	14.39	24.958	22.83	14.464	30.7577	12.0675	13.4747	17.7058	10.1031	4.75679	6.85243	6.85397
620	41.464	39.351	36.038	43.171	27.206	18.804	19.291	20.676	15.075	14.705	17.633	16.795	8.663	4.912	12.733	5.585	12.092	4.809	6.751	3.193	12.142	17.286	17.419	21.291	17.189	23.406	7.678	7.817	21.062	14.2	22.79	25.534	14.805	25.778	23.594	14.372	30.7501	12.0126	13.5578	17.763	10.4134	4.99369	6.93814	6.89893
621	41.822	39.137	36.016	42.908	27.024	18.739	19.079	21.19	15.052	15.018	17.49	16.72	9.049	5.284	12.597	5.928	12.091	4.799	6.737	3.22	12.144	17.186	16.773	20.813	17.004	23.103	7.703	7.871	21.017	14.271	23.171	26.342	14.467	25.146	22.876	14.152	30.7394	12.1423	13.387	17.7016	10.3801	4.80652	6.77491	6.90572
622	41.171	38.649	35.558	42.465	27.57	19.127	19.277	21.009	14.969	14.737	17.166	16.693	8.829	4.885	12.387	5.832	12.114	4.775	6.788	3.054	12.1	17.57	16.813	21.006	17.139	23.099	7.719	7.715	21.132	13.851	22.689	26.132	14.507	24.842	23.57	14.154	30.6033	11.9373	13.4458	17.6311	10.0207	4.83822	6.85899	6.91287
623	41.405	38.963	36.123	43.369	26.588	19.028	19.651	20.989	15.323	14.803	17.644	17.05	9.287	5.134	12.176	5.955	12.167	4.898	6.791	3.348	12.232	17.454	16.731	21.672	16.926	23.437	7.696	7.844	21.099	14.425	23.319	26.043	14.541	25.324	23.969	14.157	30.7645	12.1715	13.5656	17.8417	10.2976	4.88579	6.90206	6.99552
624	40.773	38.588	35.549	42.777	27.135	18.9	19.29	20.828	14.958	14.633	17.141	16.729	8.871	5.338	12.28	5.883	12.146	4.821	6.801	3.173	11.931	17.823	17.39	21.425	17.731	23.262	7.78	7.782	21.08	13.873	22.76	26.611	15.037	25.31	23.272	14.401	30.48	11.9791	13.6503	17.7906	10.0872	4.72291	6.99795	6.94986
625	41.478	38.479	35.851	42.614	26.691	18.884	19.528	20.658	14.907	14.719	17.496	16.633	8.689	5.268	12.422	6.005	12.172	4.798	6.784	3.327	12.284	17.383	17.315	21.434	17.483	22.982	7.749	7.714	21.008	13.877	23.102	25.823	14.855	25.837	23.123	14.125	30.5229	12.0174	13.5962	17.7213	10.1858	4.77961	6.87848	6.95985
626	41.051	38.45	35.487	42.474	27.224	19.099	19.147	20.99	14.95	14.712	17.275	16.725	9.145	4.972	12.393	6.083	12.012	4.886	6.785	3.184	12.24	17.513	17.514	21.538	17.194	23.08	7.611	7.79	20.951	13.992	22.812	26.25	14.702	25.569	23.151	13.969	30.4902	12.0319	13.5946	17.6797	10.0201	4.7646	6.92557	6.97685
627	41.186	38.624	35.455	42.447	26.932	18.902	18.778	20.294	14.838	14.678	17.259	16.733	9.11	5.066	12.652	5.684	12.288	4.948	6.798	3.285	12.039	17.227	16.934	21.606	17.324	23.635	7.706	7.856	20.948	14.321	22.83	26.03	14.575	26.258	24.075	14.333	30.3272	12.0025	13.6084	17.8932	10.2542	4.8112	6.94916	7.06373
628	41.006	38.825	35.23	42.169	27.211	18.616	19.516	20.56	14.75	14.671	17.364	16.912	9.045	5.054	12.548	5.622	12.118	4.895	6.865	3.255	11.958	17.755	17.161	21.337	17.356	22.948	7.694	7.835	21.064	13.877	22.652	26.411	14.608	25.005	23.779	14.357	30.3916	11.9957	13.5648	17.7282	10.0685	4.8632	6.86646	6.95077
629	41.017	38.455	35.584	42.352	26.923	18.707	19.458	20.872	14.762	14.704	17.097	16.856	8.721	5.155	12.772	5.774	12.071	4.857	6.787	3.266	12.272	17.748	17.095	21.223	17.353	23.258	7.676	7.724	20.922	14.037	22.936	26.397	14.516	25.754	23.338	14.206	30.421	11.9801	13.593	17.7506	10.0474	4.80271	6.90123	7.03821
630	41.138	38.297	35.561	42.081	27.092	18.849	19.339	20.784	14.795	14.748	17.184	16.71	9.146	5.265	12.71	5.658	12.133	4.972	6.828	3.302	11.9	17.51	17.4	21.519	17.706	22.926	7.629	7.771	20.914	13.925	22.585	25.776	14.816	25.291	24.108	14.302	30.3926	12.027	13.6196	17.7117	9.9995	4.76065	6.89333	6.93
631	40.744	38.505	35.084	42.128	26.273	18.451	18.901	19.992	14.679	14.703	17.056	16.693	8.608	5.123	12.629	5.567	12.16	4.872	6.886	3.365	11.999	17.6	17.326	20.987	17.499	22.089	7.669	7.678	20.924	13.95	22.79	25.92	14.898	24.995	23.098	13.961	30.0098	11.8823	13.4783	17.5883	10.2213	4.81868	6.68511	6.85611
632	40.55	38.414	34.907	41.838	26.095	17.878	19.581	20.185	14.729	14.529	17.424	17.038	9.03	4.898	12.56	5.749	12.23	4.873	6.859	3.357	12.113	17.717	16.704	20.977	17.706	22.674	7.616	7.756	20.87	13.983	22.642	26.164	14.057	24.97	23.883	14.039	29.931	11.9946	13.521	17.598	10.095	4.88865	6.75564	6.97735
633	40.734	38.209	35.248	41.786	26.453	18.351	19.018	20.086	14.522	14.602	16.954	16.939	8.789	5.579	12.791	5.697	12.179	4.944	6.871	3.254	11.783	17.637	16.784	21.446	17.847	22.167	7.711	7.789	20.773	14.049	22.838	26.109	14.715	25.497	23.116	14.053	29.9856	11.9841	13.4912	17.665	10.1153	4.68978	6.76489	6.91389
634	40.756	38.134	35.094	41.62	26.63	18.201	18.499	19.96	14.836	14.424	17.023	16.745	8.822	5.04	12.393	5.623	12.22	4.939	6.922	3.316	11.983	17.436	17.646	21.77	17.477	22.187	7.616	7.698	20.83	14.08	22.723	26.067	14.51	25.351	22.726	13.398	29.8618	11.8633	13.5896	17.4999	10.1863	4.79399	6.80269	6.92778
635	40.614	38.384	35.195	41.31	26.829	18.439	19.826	20.534	14.696	14.36	17.162	16.791	9.327	5.391	12.589	5.725	12.245	4.927	6.958	3.307	11.998	17.737	17.651	21.196	17.694	22.65	7.599	7.68	20.732	13.946	23.004	25.823	14.426	25.445	23.295	13.537	30.1414	12.0051	13.6363	17.5487	9.81631	4.67492	6.82772	6.98364
636	40.731	38.136	35.26	41.385	26.61	18.989	19.028	20.455	14.917	14.598	17.089	16.845	9.122	5.326	12.869	5.69	12.258	4.964	7.006	3.347	12.158	18.061	17.859	21.42	17.792	22.499	7.659	7.67	20.716	14.174	22.901	26.026	14.403	25.111	23.276	14.007	30.0742	12.057	13.7364	17.5943	9.8765	4.75095	6.85433	6.91002
637	40.666	38.169	35.062	41.667	26.491	18.38	19.2	19.809	14.508	14.51	17.102	16.643	9.058	4.919	12.562	5.198	12.263	4.932	6.863	3.237	12.083	17.996	16.979	20.525	17.671	21.766	7.635	7.62	20.687	13.895	22.54	25.983	13.899	26.006	23.245	13.794	29.9305	11.8125	13.4315	17.5304	10.0714	4.8591	6.61373	7.05138
638	40.328	38.478	35.091	41.691	26.455	18.54	19.362	20.264	14.529	14.5	17.201	17.013	9.285	5.313	12.122	5.986	12.251	4.892	6.97	3.381	12.086	17.408	17.617	21.01	17.83	22.403	7.602	7.676	20.746	13.909	22.723	26.393	14.104	25.573	23.374	14.309	30.0261	11.9936	13.5848	17.6409	9.94982	4.67663	6.74335	7.03541
639	39.931	37.776	34.778	41.225	26.685	17.947	19.02	20.261	14.654	14.441	17.067	16.93	9.476	5.176	12.624	5.881	12.248	5.009	6.953	3.314	12.165	17.597	17.19	21.261	17.766	22.091	7.609	7.643	20.754	14.081	22.755	25.569	14.706	25.669	23.584	13.68	29.7029	12.0311	13.5594	17.605	9.84804	4.6865	6.70545	6.96045
640	40.153	38.139	34.977	41.306	26.026	18.401	19.21	20.257	14.624	14.475	17.182	16.882	9.157	5.11	12.589	5.713	12.33	4.935	6.961	3.497	12.341	17.857	17.498	21.136	18.176	21.605	7.58	7.636	20.485	14.068	22.461	26.416	14.385	26.149	23.064	14.07	29.8086	11.9665	13.6336	17.6314	9.88006	4.76771	6.66286	7.05186
641	39.925	37.67	34.783	41.354	26.912	17.955	18.619	20.545	14.666	14.482	17.042	16.788	9.314	5.054	12.346	5.545	12.343	5.069	7.044	3.29	12.099	18.083	17.314	21.499	17.788	22.251	7.581	7.759	20.711	13.815	22.515	26.654	14.1	25.679	22.816	13.817	29.7204	11.9046	13.678	17.5447	9.87089	4.7628	6.78636	7.04249
642	39.55	37.675	34.473	40.878	26.755	18.194	19.248	20.169	14.358	14.281	16.799	16.552	9.048	5.437	12.728	5.405	12.43	4.996	7.083	3.417	12.048	17.854	17.872	21.403	18.362	22.026	7.606	7.587	20.658	13.958	22.287	25.739	14.699	25.254	23.407	13.857	29.6177	11.826	13.7491	17.5052	9.63212	4.63039	6.7877	6.87676
643	39.972	37.898	34.536	41.154	26.697	18.248	19.189	20.212	14.686	14.386	17.185	16.996	9.349	5.315	12.693	5.455	12.39	5.018	7.043	3.481	12.146	17.817	17.576	21.225	17.856	22.038	7.61	7.65	20.55	14.02	22.397	25.95	14.413	26.019	23.506	13.77	29.7382	12.0081	13.659	17.5885	9.76846	4.77771	6.69683	7.02092
644	39.821	37.713	34.376	41.021	25.778	17.866	18.679	20.378	14.567	14.318	16.858	16.717	8.913	4.977	12.562	5.842	12.415	5.045	7.122	3.403	12.099	18.056	17.141	21.383	17.847	21.847	7.608	7.627	20.583	13.887	22.559	26.431	14.085	25.678	23.314	13.858	29.454	11.8442	13.6358	17.563	9.85594	4.70118	6.68161	7.06173
645	40.203	37.651	34.886	41.063	25.57	18.281	18.489	20.006	14.648	14.541	17.034	16.79	8.83	4.859	12.484	5.659	12.454	5.047	6.989	3.523	12.175	17.951	17.619	20.72	18.179	21.613	7.559	7.615	20.501	14.154	22.644	26.905	14.432	25.898	22.327	13.768	29.5186	11.8556	13.627	17.5803	9.97419	4.8266	6.60551	7.06128
646	40.027	37.438	34.345	40.524	26.027	18.046	18.402	20.123	14.65	14.459	16.853	16.831	9.176	4.81	12.515	5.595	12.399	5.01	7.152	3.364	12.03	18.134	17.65	20.845	18.26	22.042	7.477	7.591	20.491	13.884	22.601	25.957	14.595	26.119	22.83	13.637	29.3665	11.8611	13.6886	17.5182	9.80553	4.79234	6.7198	7.02587
647	40.151	37.37	34.492	41.019	26.703	18.452	19.192	20.023	14.599	14.532	16.836	17.005	9.111	5.421	12.951	5.468	12.565	5.084	7.12	3.555	12.25	17.55	17.868	21.062	18.577	21.723	7.582	7.65	20.567	13.954	22.825	25.856	14.69	25.872	22.875	14.088	29.6753	11.9904	13.7354	17.5959	9.70046	4.73291	6.65314	6.94402
648	39.806	37.484	34.429	41.097	25.905	17.601	18.712	20.377	14.47	14.605	16.876	16.845	9.247	4.901	12.471	5.668	12.459	5.119	7.028	3.604	12.146	18.568	18.126	20.839	18.327	22.073	7.587	7.724	20.463	13.799	22.677	25.152	14.811	25.937	22.765	14.389	29.4264	11.8854	13.8289	17.5304	9.87653	4.75578	6.74649	6.81071
649	39.654	36.997	34.322	40.686	26.364	18.005	18.708	19.801	14.445	14.316	16.775	16.802	9.103	5.094	12.81	5.737	12.587	5.105	7.102	3.482	12.218	17.905	17.768	21.06	18.283	21.282	7.579	7.633	20.391	13.875	22.467	25.773	14.475	26.338	22.968	13.831	29.3171	11.8852	13.6792	17.533	9.70954	4.67613	6.60081	7.00005
650	40.073	37.695	34.111	40.525	26.071	17.773	18.789	19.398	14.593	14.232	17.1	16.977	9.103	5.291	12.895	5.439	12.561	5.155	7.252	3.45	12.262	18.661	17.62	21.02	18.88	21.541	7.62	7.648	20.585	14.134	22.715	26.563	14.384	25.915	22.712	13.985	29.3044	11.9537	13.8402	17.6261	9.91037	4.77673	6.70571	7.02962
651	39.816	37.392	34.329	40.738	26.335	17.863	18.691	19.762	14.425	14.483	17.062	16.927	9.553	5.13	13.026	5.701	12.606	5.077	7.194	3.725	12.332	17.74	17.666	21.177	18.574	21.485	7.591	7.498	20.462	13.97	22.609	25.588	14.441	26.086	22.346	13.219	29.3658	12.0384	13.7576	17.381	9.82178	4.71848	6.59578	6.95802
652	39.645	37.281	34.207	40.586	26.073	17.759	18.638	19.362	14.546	14.272	17.245	16.868	9.445	5.243	13.102	5.335	12.646	5.101	7.215	3.662	12.298	18.029	17.948	21.089	18.018	21.679	7.584	7.572	20.345	13.989	22.933	26.667	14.281	26.2	22.882	13.605	29.1939	12.007	13.7685	17.6058	9.84253	4.79096	6.61212	7.15652
653	39.587	37.09	33.943	40.442	26.277	18.509	18.743	20.083	14.576	14.472	16.877	17.03	9.554	5.361	13.169	5.768	12.7	5.142	7.261	3.611	12.453	18.35	17.674	21.493	19.613	21.922	7.542	7.495	20.325	14.075	22.825	26.535	14.348	26.704	23.582	14.204	29.3343	12.1009	14.0219	17.7635	9.5183	4.66009	6.82086	7.2324
654	39.914	37.162	34.486	40.477	26.35	17.472	18.184	19.939	14.292	14.383	16.79	16.877	9.255	5.298	12.611	5.253	12.684	5.218	7.18	3.567	12.163	18.562	17.665	21.174	18.96	21.131	7.607	7.574	20.389	13.892	22.355	26.059	14.251	25.903	22.979	13.553	29.248	11.8449	13.8304	17.4562	9.89996	4.71799	6.65387	7.00265
655	39.533	37.423	34.188	40.445	26.111	17.891	18.475	19.835	14.364	14.396	16.937	16.965	9.524	5.205	12.997	5.81	12.68	5.214	7.191	3.677	12.443	18.085	17.543	19.915	18.45	21.044	7.622	7.568	20.282	13.915	22.516	25.828	14.379	25.57	22.427	13.293	29.2376	12.0248	13.6242	17.34	9.75318	4.65928	6.38159	6.89534
656	39.69	37.311	34.146	40.523	25.948	17.963	18.79	19.539	14.475	14.41	16.771	16.923	9.609	5.398	13.538	5.368	12.703	5.254	7.324	3.784	12.503	18.089	17.337	20.746	18.97	20.861	7.469	7.561	20.285	14.063	22.621	25.768	14.314	25.906	22.616	13.862	29.2388	12.0615	13.7571	17.4465	9.76172	4.69884	6.44549	6.94222
657	39.063	37.158	34.222	40.189	25.578	17.714	18.536	19.539	14.548	14.609	16.999	16.958	9.294	5.212	13.108	5.443	12.763	5.272	7.308	3.933	12.532	17.886	17.737	21.348	19.405	21.066	7.528	7.461	20.224	14.004	22.778	25.781	14.188	26.492	22.585	14.207	28.9999	12.0214	13.925	17.5248	9.69808	4.78821	6.56706	7.03023
658	39.313	36.634	33.792	40.135	25.574	17.152	18.576	19.598	14.273	14.509	17.22	17	9.703	5.543	12.93	5.609	12.862	5.228	7.337	3.593	12.388	18.641	17.825	20.845	18.77	20.024	7.571	7.581	20.198	13.824	22.427	25.62	14.091	26.468	22.565	13.472	28.8468	12.0984	13.7513	17.3817	9.71427	4.66463	6.45488	7.00602
659	39.525	37.115	33.88	39.939	25.857	18.471	18.793	19.188	14.258	14.216	16.947	16.94	9.599	5.298	13.183	5.031	12.914	5.239	7.319	3.742	12.497	18.533	17.989	21.028	19.65	20.886	7.526	7.575	20.278	13.953	22.633	26.931	14.486	27.112	23.009	13.72	29.096	11.934	13.9797	17.7223	9.571	4.77342	6.62692	7.29684
660	39.708	37.23	34.055	40.054	25.586	17.545	18.635	19.076	14.669	14.475	17.074	17.085	9.359	5.333	13.364	5.676	12.98	5.325	7.438	3.828	12.994	18.595	17.882	20.938	18.948	21.529	7.591	7.611	20.225	14.032	22.812	26.382	14.849	26.853	22.709	13.667	28.9861	12.1294	14.0457	17.6731	9.84834	4.75087	6.57694	7.1381
661	39.24	36.809	34.127	40.144	25.742	17.963	18.89	19.352	14.11	14.497	16.781	16.936	9.622	5.436	13.131	5.651	13.034	5.343	7.41	3.8	12.82	18.562	18.168	21.208	20.009	21.275	7.569	7.577	20.105	13.977	22.614	26.344	14.023	26.449	22.996	13.635	29.0334	12.0205	14.1629	17.5289	9.59189	4.6018	6.69697	7.13339
662	39.472	36.458	33.673	39.706	25.572	17.642	18.651	19.546	14.226	14.191	16.802	16.891	9.763	5.335	13.409	5.574	13.011	5.32	7.47	3.895	12.37	18.566	18.406	20.594	20.028	20.453	7.418	7.48	20.123	13.925	22.81	26.118	14.84	26.712	22.173	13.878	28.84	12.0239	14.0113	17.5477	9.55264	4.62041	6.54428	7.07926
663	39.186	36.795	33.84	40.161	25.945	17.338	18.892	18.937	14.344	14.618	17.154	17.193	9.585	5.076	13.59	5.562	13.149	5.328	7.455	3.932	12.899	18.634	18.131	21.074	19.691	20.627	7.528	7.529	20.012	13.913	22.599	26.984	14.516	26.857	22.392	13.951	28.8867	12.1402	14.092	17.6281	9.71875	4.83251	6.55017	7.20189
664	38.913	36.68	33.623	39.613	25.649	17.688	19.247	19.532	14.199	14.295	16.758	17.029	9.948	5.492	13.149	5.553	13.086	5.4	7.487	3.814	12.705	18.469	18.163	21.572	20.341	20.885	7.517	7.496	20.165	14.022	22.378	26.383	14.052	26.76	22.935	14.034	28.8681	12.0529	14.1922	17.5742	9.37377	4.58972	6.70428	7.15523
665	38.908	36.281	33.477	39.272	26.2	17.875	18.877	18.559	14.226	14.217	16.619	17.081	9.412	5.265	13.105	5.699	13.187	5.418	7.54	3.811	12.63	18.958	18.292	20.598	19.46	20.409	7.568	7.49	20.065	13.997	22.365	26.019	14.238	26.806	22.909	13.353	28.6811	11.953	14.0303	17.481	9.4038	4.62888	6.49059	7.13076
666	39.098	36.549	33.705	39.627	25.904	17.269	18.705	19.926	14.218	14.43	16.865	16.968	9.826	5.476	13.356	5.89	13.199	5.474	7.492	3.861	12.652	18.981	17.977	21.32	20.35	20.974	7.562	7.491	20.024	13.874	22.553	26.512	14.594	27.193	22.233	13.897	28.8479	12.1286	14.228	17.5933	9.48207	4.55915	6.69123	7.17175
667	38.852	36.773	33.453	39.293	25.354	17.705	18.413	19.779	14.283	14.302	16.822	16.845	9.392	5.282	13.279	5.582	13.322	5.436	7.672	3.949	12.587	18.354	18.371	20.465	19.864	20.265	7.451	7.459	20.053	13.786	22.362	26.829	14.892	27.042	22.29	13.61	28.7028	11.9734	14.0285	17.5774	9.41527	4.65972	6.41485	7.21613
668	38.928	36.404	33.854	39.477	25.66	17.535	18.596	19.084	14.51	14.356	16.96	17.046	9.961	5.431	13.546	5.587	13.343	5.475	7.53	4.02	12.727	19.106	17.987	20.747	20.1	20.412	7.535	7.561	20.021	13.977	23.013	26.979	14.17	27.614	23.144	13.333	28.6922	12.1746	14.1447	17.7347	9.52536	4.66746	6.51317	7.44719
669	39.241	36.567	33.806	39.408	25.821	17.358	18.863	19.109	14.372	14.545	16.797	17.166	9.821	5.274	13.705	5.8	13.437	5.482	7.722	4.124	12.894	18.734	18.334	20.629	20.46	20.258	7.613	7.532	19.963	14.017	22.65	26.599	14.665	26.951	22.426	13.442	28.7716	12.185	14.2074	17.5858	9.55718	4.67306	6.46913	7.16972
670	38.813	36.263	33.51	38.93	25.928	16.961	18.641	19.636	14.253	14.411	16.667	17.215	9.652	5.5	13.697	5.367	13.412	5.603	7.568	4.01	12.715	18.795	18.241	21.348	20.808	20.752	7.486	7.519	20.095	14.013	22.582	26.811	14.591	26.829	22.676	13.729	28.5852	12.0953	14.3252	17.6331	9.3807	4.69701	6.66274	7.20834
671	38.772	36.212	33.673	39.306	25.974	17.295	18.612	18.62	14.322	14.702	16.707	16.803	9.641	5.473	14.11	5.41	13.452	5.542	7.673	4.137	12.893	18.426	18.171	21.304	21.096	20.716	7.485	7.475	19.86	14.037	22.575	26.433	14.78	27.038	23.284	13.853	28.558	12.146	14.341	17.682	9.53049	4.68727	6.6249	7.21659
672	39.152	36.385	33.312	39.311	25.265	16.941	18.897	19.481	14.107	14.468	16.964	17.147	9.784	5.308	13.341	5.66	13.504	5.648	7.669	4.161	12.887	18.704	18.836	20.223	20.621	20.052	7.563	7.476	19.904	14.136	22.367	27.144	14.539	26.994	22.533	13.338	28.593	12.0974	14.2305	17.5994	9.51118	4.67936	6.4317	7.2608
673	38.687	36.512	33.344	39.102	25.082	16.772	17.883	19.666	14.282	14.449	16.917	17.22	9.802	5.293	13.57	5.712	13.624	5.461	7.787	4.223	12.909	18.6	18.867	20.838	20.964	20.277	7.507	7.323	20.046	14.131	22.408	26.787	14.584	26.929	22.132	13.602	28.381	12.1556	14.355	17.5449	9.5895	4.69431	6.55474	7.19289
674	38.804	35.652	33.14	39.079	25.311	17.482	18.681	19.215	14.471	14.347	16.909	16.892	10.445	5.234	14.041	6.317	13.578	5.623	7.788	4.128	12.937	18.806	18.147	20.972	20.745	19.765	7.53	7.522	19.937	14.043	22.5	26.684	14.145	27.565	22.236	13.731	28.4205	12.332	14.2489	17.5893	9.29599	4.52645	6.45103	7.26722
675	38.57	36.16	33.067	38.993	26.196	17.348	18.612	18.622	14.235	14.264	16.937	17.439	9.992	5.394	13.948	5.257	13.585	5.7	7.786	4.482	13.165	18.7	18.379	21.334	21.115	20.228	7.488	7.414	19.972	14.148	22.466	27.127	14.134	27.877	22.578	13.132	28.446	12.1833	14.4474	17.6336	9.38114	4.792	6.51006	7.4562
676	38.374	36.15	33.22	38.749	24.97	16.948	18.417	19.026	14.27	14.45	16.747	17.425	10.101	5.453	13.432	5.983	13.608	5.703	7.821	4.152	13.106	19.151	19.242	20.74	21.578	20.158	7.475	7.448	19.971	13.912	22.448	26.797	14.257	27.374	22.16	13.815	28.2318	12.2326	14.5259	17.5657	9.41197	4.58898	6.64142	7.26257
677	38.815	35.797	33.048	38.964	24.559	16.913	18.235	19.229	14.184	14.506	16.926	17.241	9.872	5.344	13.321	5.586	13.784	5.725	7.933	4.452	13.123	19.057	19.276	20.64	20.71	19.921	7.53	7.433	19.81	13.901	22.613	26.465	14.838	27.551	22.171	13.462	28.195	12.1225	14.4621	17.5774	9.48828	4.69618	6.43523	7.23971
678	37.904	35.981	32.777	38.801	25.571	17.152	18.484	18.769	14.053	14.364	16.868	17.068	9.875	5.139	14.006	5.318	13.847	5.745	7.917	4.343	13.139	19.067	18.344	20.797	21.291	19.763	7.518	7.49	19.905	13.803	22.21	26.758	14.563	28.027	22.69	12.979	28.1799	12.0864	14.4253	17.5943	9.26092	4.77176	6.45046	7.40808
679	38.228	36.012	32.659	38.557	26.056	17.397	18.331	18.776	14.141	14.198	16.582	17.062	9.875	4.943	13.58	5.71	13.741	5.861	7.869	4.313	13.034	18.939	18.696	20.672	21.582	19.95	7.459	7.465	19.796	13.903	22.225	27.17	14.102	27.554	22.493	13.541	28.252	12.0114	14.4657	17.5708	9.22905	4.66614	6.50088	7.36923
680	38.233	35.893	32.79	38.318	25.783	17.192	18.373	18.925	13.939	14.27	17.038	17.296	10.168	5.424	13.754	5.328	13.871	5.829	7.94	4.471	13.126	18.878	19.042	21.28	21.531	20	7.527	7.428	19.824	14.108	22.494	26.397	14.109	27.608	22.153	13.66	28.1884	12.1521	14.5968	17.5308	9.20324	4.72605	6.5527	7.24159
681	38.395	36.234	32.99	37.972	24.71	16.714	18.518	18.732	14.241	14.427	16.943	17.15	9.936	5.244	13.804	5.603	13.863	5.881	7.861	4.516	13.402	19.8	19.24	21.086	22.523	19.819	7.565	7.391	19.755	13.971	22.85	27.684	14.301	27.592	22.293	13.398	28.0331	12.1685	14.7991	17.68	9.36703	4.71655	6.71113	7.4709
682	38.205	36.216	32.87	38.958	25.126	17.111	18.135	19.219	14.061	14.454	16.764	17.2	10.166	5.439	14.029	5.619	13.933	5.774	7.992	4.464	13.222	18.493	18.961	20.766	21.363	19.394	7.533	7.369	19.701	14.008	22.964	26.809	14.741	27.927	22.246	13.486	28.23	12.2165	14.4362	17.6784	9.38289	4.64258	6.38829	7.38002
683	38.041	35.747	32.942	38.552	24.919	16.987	18.374	18.335	14.205	14.578	16.857	17.355	10.523	5.643	14.188	5.734	14.026	5.838	8.055	4.667	13.342	19.009	18.65	21.368	21.602	19.387	7.558	7.377	19.65	14.034	22.653	27.094	13.791	28.171	22.955	13.323	27.9871	12.3854	14.5944	17.6606	9.36144	4.6172	6.44444	7.53603
684	38.36	35.838	32.891	38.873	25.466	16.581	18.98	18.663	14.162	14.293	16.957	17.323	10.014	5.088	13.845	5.631	14.072	5.895	8.014	4.709	13.512	19.222	18.935	20.632	21.56	19.448	7.493	7.471	19.767	14.038	22.493	27.464	14.165	27.567	22.403	13.258	28.2065	12.1641	14.5999	17.6119	9.38023	4.75561	6.38515	7.42692
685	37.932	35.563	32.491	38.265	25.173	16.755	18.724	19.295	13.839	14.308	16.693	17.132	9.872	5.346	13.988	5.717	14.122	5.926	7.949	4.331	13.104	19.003	18.835	21.831	22.159	20.457	7.596	7.455	19.631	13.792	22.532	27.702	14.494	28.289	22.399	14.302	28.0247	12.1119	14.7717	17.8192	9.08406	4.61678	6.73424	7.49319
686	38.16	35.92	32.885	38.288	25.308	16.465	17.972	18.356	14.246	14.537	17.09	17.522	10.13	5.404	13.74	5.61	14.121	5.969	8.152	4.681	13.422	18.826	19.267	20.944	21.823	19.693	7.596	7.458	19.724	14.123	22.904	27.412	14.332	28.09	22.442	13.562	27.9192	12.2849	14.6898	17.7643	9.48289	4.75238	6.44628	7.48442
687	38.358	35.888	32.92	38.121	25.544	16.906	18.379	18.409	14.312	14.763	16.781	17.5	10.265	5.299	13.746	4.972	14.155	6.029	8.077	4.952	13.774	18.853	18.453	21.006	22.358	20.425	7.538	7.429	19.57	14.157	22.757	26.686	14.573	29.221	22.674	13.827	28.0656	12.2047	14.8082	17.8432	9.33331	4.8713	6.47757	7.55115
688	38.376	35.836	32.752	38.416	25.518	16.879	18.89	18.638	14.185	14.604	16.634	17.168	10.808	5.549	14.516	5.737	14.372	5.995	8.089	4.797	13.622	18.855	18.988	21.285	22.477	19.465	7.658	7.372	19.776	14.121	22.611	27.396	14.447	28.502	22.866	13.592	28.1631	12.4001	14.7945	17.8341	9.2613	4.58333	6.50583	7.55283
689	37.865	35.298	32.521	37.647	25.078	16.95	18.569	18.475	14.162	14.489	16.711	17.288	10.345	5.167	13.906	5.225	14.307	6.067	8.184	4.789	13.453	19.088	19.264	21.003	22.006	19.34	7.466	7.432	19.712	14.093	22.765	27.188	13.915	28.267	22.756	13.524	27.8004	12.1616	14.7501	17.7118	9.05597	4.77761	6.42581	7.54166
690	38.075	35.891	32.69	38.161	25.266	16.84	18.462	19.066	14.095	14.566	16.982	17.555	10.097	5.521	13.935	5.814	14.272	5.985	8.129	4.879	13.682	19.238	19.12	21.182	22.157	19.272	7.452	7.338	19.648	14.162	22.635	27.166	14.476	28.068	22.464	13.079	28.0564	12.3206	14.7916	17.6488	9.19472	4.68186	6.45818	7.4876
691	37.548	35.342	32.57	37.745	25.012	16.784	18.267	18.383	14.273	14.512	16.818	17.635	10.246	5.348	14.317	5.376	14.491	6.062	8.081	4.833	13.599	19.279	18.887	20.896	22.476	18.957	7.55	7.338	19.498	14.06	22.527	26.856	13.966	28.744	21.757	13.306	27.7064	12.3156	14.7561	17.5602	9.11964	4.81393	6.43329	7.49438
692	38.08	35.429	32.891	38.302	25.451	16.539	18.391	18.401	14.217	14.558	16.821	17.616	10.701	5.505	13.91	6.078	14.509	6.077	8.16	4.982	13.413	19.338	18.967	20.997	22.43	20.05	7.567	7.435	19.612	14.137	22.981	27.688	14.061	28.583	22.18	13.542	27.9355	12.4258	14.8923	17.7786	9.32847	4.5885	6.5033	7.60867
693	37.929	35.37	32.312	37.946	24.394	16.222	18.558	18.557	14.011	14.671	16.878	17.56	9.928	5.131	14.12	5.437	14.339	6.078	8.168	4.928	13.556	19.107	19.375	20.876	22.802	19.376	7.505	7.305	19.657	14.055	22.765	27.741	14.463	28.287	22.364	13.187	27.661	12.217	14.8605	17.7329	9.25469	4.84847	6.50305	7.60305
694	38.057	35.556	32.571	38.121	25.956	17.116	18.734	17.99	14.387	14.782	16.969	17.576	10.608	5.542	13.881	5.308	14.607	6.095	8.081	4.992	13.888	19.418	18.92	21.152	22.306	19.36	7.555	7.391	19.44	14.236	22.789	27.411	14.066	28.769	22.081	13.588	28.0126	12.3816	14.8819	17.7326	9.18276	4.7812	6.4438	7.57367
695	37.436	35.133	32.333	37.45	24.867	16.789	18.034	18.872	14.094	14.624	16.782	17.572	10.859	5.537	14.478	5.798	14.556	6.151	8.244	5.089	13.765	18.997	19.011	20.735	23.213	19.483	7.608	7.349	19.621	14.186	22.571	27.363	13.889	28.76	22.257	12.791	27.6142	12.468	14.9244	17.6395	8.9837	4.6462	6.46655	7.62893
696	37.39	35.541	32.577	37.563	25.396	16.535	18.133	18.341	14.074	14.575	16.775	17.492	10.396	6.113	14.45	5.675	14.623	6.088	8.269	5.028	13.584	19.256	19.044	21.558	22.646	19.315	7.507	7.32	19.56	14.071	22.954	27.188	13.835	28.852	22.565	13.418	27.6845	12.4437	14.9411	17.727	9.14583	4.56003	6.50503	7.65361
697	37.489	35.504	32.165	37.568	24.847	16.177	17.939	18.731	13.794	14.631	16.841	17.228	10.317	5.937	14.083	5.889	14.555	6.204	8.281	5.22	13.505	19.171	19.751	21.399	22.593	18.927	7.516	7.266	19.506	14.12	22.533	26.845	14.127	28.975	22.39	13.863	27.5525	12.34	14.9606	17.7141	9.18466	4.4922	6.45129	7.54437
698	37.6	35.361	32.148	37.633	25.521	16.697	19.437	18.464	14.046	14.781	16.527	17.392	10.033	5.274	14.098	5.256	14.667	6.153	8.28	5.128	13.768	19.735	19.423	21.677	24.012	19.481	7.497	7.282	19.543	14.269	22.435	27.915	13.784	28.723	22.216	13.401	27.8576	12.1759	15.2324	17.7065	8.89901	4.78437	6.74812	7.67599
699	37.296	34.95	32.325	37.549	24.993	16.157	18.667	17.724	14.086	14.544	16.552	17.655	10.144	5.307	13.961	5.339	14.637	6.065	8.302	5.287	13.924	18.75	19.255	21.299	22.889	18.756	7.49	7.278	19.382	14.112	22.524	27.684	14.119	28.639	21.99	13.601	27.4576	12.1985	14.9164	17.6819	9.13591	4.77588	6.39834	7.59535
700	37.775	35.279	32.388	37.689	25.566	16.364	18.893	18.202	14.222	14.573	16.836	17.66	10.605	5.362	14.829	5.241	14.713	6.135	8.329	5.166	13.602	18.981	19.321	20.342	22.593	19.008	7.611	7.339	19.345	14.095	22.808	26.879	14.132	28.303	21.523	13.144	27.7695	12.416	14.819	17.5179	9.11435	4.85934	6.30944	7.41905
701	37.545	34.943	32.29	37.181	25.691	17.061	18.457	17.997	14.374	14.664	17.051	17.572	10.585	5.519	14.681	5.737	14.67	6.168	8.325	5.232	13.851	19.301	20.421	21.414	23.02	19.179	7.548	7.284	19.368	14.389	22.601	27.964	14.358	29.543	22.252	13.815	27.6456	12.5229	15.1581	17.9122	8.92128	4.74378	6.58249	7.75643
702	37.185	34.973	32.127	37.286	25.086	16.517	18.468	18.099	13.915	14.382	16.678	17.581	10.598	5.589	14.092	5.455	14.761	6.183	8.383	5.211	13.563	19.152	19.095	20.753	22.826	18.723	7.526	7.334	19.338	14.208	22.385	27.436	13.875	28.623	21.692	13.387	27.4676	12.2862	14.865	17.5804	8.96996	4.65981	6.33772	7.5345
703	37.359	35.02	32.114	37.523	25.074	17.054	18.377	18.706	14.181	14.649	16.789	17.526	10.464	5.388	13.732	5.373	14.637	6.199	8.321	5.26	13.765	19.36	19.675	20.246	22.88	18.363	7.578	7.207	19.404	14.204	22.514	27.355	14.314	28.232	22.186	13.507	27.6534	12.2628	14.8706	17.6501	8.87114	4.74624	6.32643	7.4844
704	37.574	35.044	31.637	37.495	25.612	16.43	18.026	17.973	14.171	14.543	17.129	17.856	10.642	5.22	14.483	5.503	14.601	6.187	8.342	5.33	13.907	19.182	19.005	20.657	23.555	19.639	7.395	7.166	19.407	14.121	22.624	28.028	14.028	28.877	21.762	13.599	27.4739	12.4434	15.0405	17.7007	9.11856	4.87553	6.47288	7.71378
705	37.45	34.709	31.996	36.704	24.339	15.78	18.251	17.811	13.928	14.389	16.484	17.528	10.543	5.359	14.511	5.522	14.752	6.166	8.337	5.26	13.781	19.28	19.56	20.657	22.864	18.879	7.5	7.267	19.43	13.922	22.402	27.931	14.469	28.799	21.875	13.604	27.13	12.283	14.9536	17.7199	9.11495	4.68957	6.38428	7.63593
706	37.282	34.808	31.911	37.401	24.904	16.066	18.388	18.058	14.029	14.939	16.514	17.87	10.301	4.754	13.921	5.25	14.871	6.16	8.372	5.49	13.851	19.232	19.521	20.88	22.629	18.942	7.518	7.281	19.333	14.358	22.633	27.805	14.673	29.229	21.842	13.274	27.3523	12.1973	14.9948	17.7946	9.07164	4.95581	6.3291	7.68293
707	37.19	34.611	31.86	37.078	25.358	15.91	17.959	18.027	13.818	14.576	16.697	17.505	10.369	5.583	14.343	5.893	14.688	6.109	8.354	5.351	13.62	19.226	19.828	20.838	22.91	18.707	7.411	7.27	19.373	13.744	22.481	27.348	14.148	28.863	21.159	13.279	27.2491	12.348	14.9631	17.5076	9.05847	4.59755	6.41068	7.5822
708	36.807	34.4	32.174	37.347	25.052	16.577	18.288	18.072	13.698	14.719	16.6	17.535	10.407	5.466	14.824	5.419	14.714	6.089	8.345	5.357	13.612	19.345	19.56	21	22.831	18.369	7.559	7.256	19.264	14.036	22.456	27.584	14.102	28.194	21.378	12.513	27.3396	12.3335	14.9222	17.4342	8.87924	4.7464	6.38555	7.53434
709	37.238	34.494	31.696	36.908	25.373	16.211	18.767	17.994	13.821	14.656	16.927	17.418	11.042	5.293	14.11	5.282	14.711	6.191	8.328	5.446	13.589	19.092	19.499	20.424	23.166	18.438	7.389	7.281	19.276	14.041	22.567	27.593	13.622	28.857	21.624	13.562	27.3351	12.3186	14.8884	17.5812	8.84985	4.76105	6.32676	7.64338
710	37.49	34.321	31.873	37.27	25.028	16.634	18.673	17.456	14.012	14.647	16.936	17.81	11.024	5.484	14.693	5.234	14.602	6.103	8.535	5.313	13.581	18.617	20.283	20.508	23.006	18.76	7.458	7.234	19.213	14.301	22.361	27.273	14.7	28.838	21.287	13.266	27.3431	12.48	14.9308	17.5931	8.97364	4.83696	6.38122	7.50639
711	37.233	34.657	31.951	36.943	24.899	15.885	18.488	17.867	14.07	14.813	16.888	17.697	10.287	5.416	13.968	5.325	14.867	6.148	8.469	5.593	13.922	19.469	19.595	20.883	22.752	17.996	7.534	7.291	19.335	14.13	22.74	27.408	13.494	28.811	21.9	13.074	27.2404	12.308	14.9694	17.5717	9.02442	4.81811	6.28436	7.65056
712	37.344	34.562	32.113	36.792	24.637	15.964	17.905	17.687	14.15	14.702	16.611	17.799	10.335	5.279	13.911	5.24	14.569	6.127	8.53	5.643	13.89	19.218	19.88	20.766	23.209	18.084	7.434	7.297	19.35	14.281	22.539	27.528	14.311	29.003	21.391	12.841	27.1255	12.2534	14.9916	17.5975	9.1254	4.8343	6.33608	7.63328
713	37.31	34.558	31.284	36.675	24.371	16.143	18.73	17.951	13.884	14.575	16.844	17.754	10.828	5.357	14.267	5.324	14.757	6.102	8.453	5.626	13.616	18.521	20.346	21.013	23.159	18.458	7.554	7.156	19.299	14.04	22.842	26.933	14.271	28.949	21.572	13.681	27.1277	12.3541	15.0051	17.6297	8.86655	4.79525	6.39048	7.53622
714	36.644	34.675	31.217	36.378	24.502	16.216	17.554	17.881	13.74	14.627	16.617	17.742	9.994	5.011	13.966	5.875	14.638	6.111	8.411	5.516	13.664	18.97	18.822	20.456	22.467	17.064	7.484	7.141	19.149	13.795	22.13	26.243	14.184	27.975	21.672	13.643	26.8834	12.1965	14.6119	17.3416	8.88378	4.75331	6.0822	7.26257
715	37.128	34.464	31.581	36.804	25.103	16.134	18.081	18.472	13.996	14.403	16.919	17.906	10.121	5.643	13.66	5.618	14.603	6.107	8.466	5.436	13.499	18.668	19.665	20.334	22.718	18.709	7.277	7.181	19.225	14.23	22.466	26.303	13.608	28.929	21.959	12.741	27.2209	12.2832	14.8205	17.3919	8.85555	4.71505	6.25681	7.56452
716	36.532	34.489	31.568	36.3	23.967	15.744	18.061	17.659	13.551	14.695	16.637	17.604	10.739	5.434	14.028	5.726	14.706	6.122	8.355	5.514	13.495	19.028	18.401	20.196	22.598	17.947	7.602	7.186	19.142	13.982	22.566	26.241	13.493	28.274	21.573	13.219	26.79	12.3018	14.6362	17.3278	8.92032	4.62949	6.10275	7.36543
717	36.724	34.531	31.348	36.413	24.989	17.224	18.34	17.498	13.85	14.39	16.526	18.047	10.705	5.519	13.907	5.617	14.736	6.139	8.393	5.608	13.515	19.253	18.987	20.138	22.754	18.215	7.488	7.188	19.172	14.054	22.591	26.712	13.937	28.292	21.031	12.431	27.1334	12.3201	14.7738	17.2896	8.64818	4.68166	6.1733	7.44543
718	37.207	34.353	31.468	36.376	24.468	15.612	17.8	18.068	13.738	14.854	16.842	17.527	10.408	5.441	13.631	5.539	14.513	6.147	8.398	5.707	13.703	19.488	20.096	19.783	23.181	18.061	7.407	7.217	19.114	13.966	22.663	27.17	14.188	29.263	21.707	13.39	26.919	12.2475	14.9077	17.6085	8.99673	4.69997	6.2844	7.64983
719	36.926	34.442	31.674	36.663	25.03	15.979	17.685	17.587	13.831	14.861	16.979	18.057	10.564	5.534	14.258	5.348	14.57	6.112	8.445	5.859	13.931	18.515	19.609	20.698	22.287	17.458	7.565	7.068	19.118	14.245	22.623	26.081	13.851	29.207	21.375	13.652	26.9982	12.429	14.7484	17.4785	9.02256	4.85154	6.06836	7.45959
720	36.619	34.329	31.423	36.063	25.004	16.603	18.741	18.109	13.802	14.578	16.572	18.011	11.13	5.625	14.177	5.92	14.534	6.175	8.486	5.352	13.269	19.744	19.713	20.664	22.187	18.435	7.352	7.291	19.147	14.182	22.758	26.949	14.247	29.144	21.914	13.995	27.1114	12.4769	14.8559	17.6979	8.51204	4.60144	6.29509	7.56747
721	37.09	34.32	31.277	36.62	24.924	16.185	18.514	17.786	13.803	14.635	16.991	17.626	10.795	5.512	14.144	5.457	14.559	6.138	8.461	5.596	13.57	18.822	19.586	20	21.96	18.04	7.241	7.267	19.137	14.119	22.83	26.82	14.554	28.049	21.02	12.696	27.0895	12.3704	14.6732	17.3733	8.81839	4.73003	6.04816	7.41329
722	36.397	33.949	31.305	36.233	24.538	15.413	17.432	18.03	14.015	14.75	16.602	17.686	10.45	5.364	13.918	5.886	14.531	6.096	8.373	5.666	13.563	19.289	19.458	19.617	21.677	17.187	7.398	7.108	18.989	14.199	22.844	27.148	13.941	27.824	20.76	12.762	26.6621	12.3339	14.5457	17.2973	8.87845	4.65585	5.95813	7.42905
723	36.784	34.351	31.291	36.677	24.626	16.121	18.505	17.589	13.799	14.583	16.875	18.047	10.717	5.452	13.956	5.617	14.493	6.125	8.298	5.69	13.528	18.25	19.241	19.559	23.047	17.289	7.367	7.154	18.955	14.352	22.828	25.927	14.244	28.278	21.286	13.637	26.993	12.3808	14.552	17.4028	8.83613	4.75352	6.05624	7.28068
724	36.918	34.141	31.491	35.883	24.341	15.595	17.399	16.922	13.891	14.999	16.698	17.776	10.52	5.106	13.667	5.309	14.44	6.075	8.433	5.778	13.261	19.176	19.267	20.629	22.401	17.815	7.424	7.161	18.95	13.931	22.906	25.99	14.332	28.742	21.689	13.113	26.5862	12.2457	14.7275	17.4238	9.08655	4.85189	6.15045	7.43655
725	36.768	34.205	31.502	36.387	24.44	15.536	18.13	17.577	13.887	14.401	16.961	17.629	9.733	5.081	13.832	5.525	14.509	6.119	8.398	5.664	13.656	18.681	19.899	20.801	23.118	17.458	7.373	7.155	18.949	14.241	22.711	26.354	14.089	29.141	21.926	12.924	26.8181	12.1311	14.8303	17.4863	8.95139	4.83704	6.27627	7.56835
726	36.704	34.288	31.099	36.252	24.953	15.619	18.591	17.405	13.798	14.483	16.93	17.912	10.532	5.227	13.737	5.322	14.455	6.105	8.386	5.716	13.775	18.735	19.049	19.931	22.511	17.499	7.29	7.218	19.05	14.038	22.683	26.114	13.705	27.985	20.89	12.802	26.8639	12.2426	14.6162	17.1775	8.83199	4.83773	6.02497	7.32027
727	36.76	34.3	31.608	36.014	24.828	15.881	17.708	17.385	13.834	14.791	17.005	17.876	10.493	5.403	14.272	5.298	14.337	6.034	8.435	5.786	13.662	18.841	19.51	20.613	22.483	17.434	7.508	7.117	18.955	14.358	22.617	26.041	14.185	27.93	20.447	13.262	26.8105	12.3715	14.7135	17.242	8.92737	4.86234	6.1311	7.18426
728	35.727	33.611	31.065	35.614	24.818	16.017	18.128	17.658	13.881	14.723	16.676	17.73	10.306	5.184	13.612	5.227	14.453	6.033	8.333	5.799	13.501	19.341	19.756	20.073	22.433	17.646	7.488	7.145	18.988	13.828	22.122	27.332	14.222	28.409	20.667	13.008	26.5798	12.1674	14.7368	17.3209	8.4562	4.82887	6.15375	7.45977
729	36.448	33.7	30.926	36.003	24.904	15.517	18.897	17.85	13.587	14.712	16.613	17.714	10.509	5.362	13.658	5.383	14.292	6.128	8.399	5.585	13.219	19.234	19.076	19.866	23.056	18.018	7.406	7.231	18.873	14.042	22.262	26.237	13.595	28.228	21.814	13.636	26.7806	12.1922	14.6873	17.3324	8.58463	4.72572	6.19901	7.33178
730	35.919	33.55	31.148	35.782	24.533	16.205	18.011	17.625	13.616	14.89	16.865	18.013	10.679	5.23	13.917	5.518	14.299	6.086	8.466	5.562	13.018	18.728	19.755	20.53	22.423	17.715	7.439	7.051	18.879	13.996	22.25	26.83	14.223	28.12	20.645	13.006	26.5966	12.341	14.6582	17.2439	8.50873	4.8274	6.18278	7.35716
731	36.245	34.038	30.841	36.05	24.403	15.727	18.485	17.428	14.096	14.739	17.175	18.017	10.195	5.284	13.403	5.516	14.214	5.993	8.449	5.677	13.47	18.895	19.331	19.957	22.516	17.398	7.454	7.081	18.982	14.079	22.654	26.456	14.029	28.508	21.179	13.42	26.6521	12.3031	14.59	17.3842	8.69026	4.87733	6.08257	7.40437
732	36.64	33.851	30.781	35.629	24.586	15.497	17.872	17.172	13.638	14.351	16.762	18.144	10.5	5.625	13.274	5.458	14.324	6.037	8.343	5.622	13.397	18.639	20.131	19.03	21.999	17.497	7.184	7.177	18.792	14.016	22.464	25.732	13.732	27.309	20.58	12.681	26.5035	12.219	14.5019	16.9667	8.82129	4.71416	6.00162	7.14515
733	36.418	34.022	31.042	35.577	24.729	15.411	17.705	17.549	13.867	14.876	16.451	18.06	10.264	5.271	14.109	5.899	14.204	5.962	8.442	5.872	13.377	18.712	20.132	20.204	22.31	17.67	7.311	7.137	18.803	14.081	22.364	25.736	14.073	27.855	20.484	13.557	26.5566	12.3496	14.6885	17.1401	8.79544	4.74006	6.12893	7.13529
734	36.292	33.64	30.649	35.953	24.598	15.857	17.543	17.428	14.005	14.68	16.452	18.04	10.907	5.879	13.923	5.563	14.176	5.998	8.439	5.878	13.22	18.176	19.332	19.773	22.582	17.113	7.465	7.104	18.834	14.143	22.545	26.064	13.738	27.821	20.085	13.155	26.495	12.4311	14.4687	17.0954	8.72481	4.62619	5.98056	7.18966
735	36.328	33.549	30.556	35.857	23.989	15.506	17.67	17.476	14.072	14.561	16.532	17.757	10.176	5.817	13.735	5.266	14.114	6.065	8.372	5.524	12.915	18.203	19.834	19.533	21.852	16.716	7.378	7.089	18.793	13.919	22.535	26.132	13.939	27.734	20.543	12.823	26.3664	12.2395	14.3128	17.0885	8.75634	4.69024	5.94454	7.2423
736	35.957	33.737	31.005	35.841	24.206	14.744	18.595	17.808	13.787	14.757	16.676	18.124	10.06	5.533	13.408	5.653	14.238	5.959	8.391	5.795	13.134	18.642	18.888	19.707	22.893	17.515	7.408	7.035	18.794	14.026	22.608	25.578	13.822	28.978	20.448	13.284	26.4866	12.2498	14.5162	17.1981	8.70847	4.74366	6.06478	7.35814
737	36.145	33.563	30.487	35.429	24.256	15.174	18.022	16.804	13.624	14.733	16.956	17.99	10.411	5.491	13.655	5.491	14.179	6.053	8.387	5.819	13.213	18.647	19.475	20.4	22.806	17.74	7.35	7.132	18.733	14.042	22.963	26.175	14.209	28.702	21.162	13.284	26.235	12.2939	14.6719	17.3752	8.76011	4.77876	6.16252	7.42698
738	36.419	33.386	31.021	35.91	24.593	15.542	18.747	16.65	14.017	15.03	16.835	18.215	10.533	5.492	13.69	5.324	14.21	5.919	8.403	5.774	13.097	18.854	19.356	19.213	22.22	16.627	7.356	7.037	18.769	14.148	22.533	25.623	14.131	27.678	20.395	13.197	26.5335	12.392	14.3673	17.0867	8.74747	4.86906	5.94137	7.12325
739	36.355	33.664	31.228	35.812	24.056	15.822	19.035	16.611	14.214	14.736	16.786	18.094	10.978	5.634	13.917	5.482	14.186	5.971	8.38	5.898	13.117	18.971	19.945	19.435	22.5	16.59	7.417	6.993	18.844	14.2	22.215	26.219	13.69	27.372	20.235	12.911	26.5729	12.4801	14.4993	17.0096	8.70944	4.75568	6.04211	7.1579
740	36.122	33.409	30.532	35.346	24.231	15.939	18.081	17.212	13.912	14.999	16.855	18.057	10.079	5.522	13.814	5.573	14.085	5.886	8.371	5.631	13.314	18.782	19.548	19.546	21.232	16.569	7.304	7.024	18.676	13.985	22.343	25.138	14.212	27.34	20.871	13.214	26.359	12.3514	14.2964	17.0107	8.52305	4.81325	5.87338	7.02545
741	36.251	33.643	30.457	35.637	24.446	15.289	18.541	17.333	13.911	14.738	16.827	17.791	10.532	5.355	13.558	5.647	14.088	5.852	8.528	5.853	13.006	18.47	19.566	20.176	22.674	17.609	7.358	7.014	18.725	14.296	22.708	24.874	14.288	27.498	21.192	13.491	26.4496	12.2949	14.5822	17.1444	8.63971	4.72664	6.12536	7.03007
742	36.019	33.035	30.741	35.067	24.117	15.203	18.574	17.291	14.066	14.657	16.948	17.801	10.276	5.397	13.452	5.712	14.053	5.834	8.544	5.665	12.975	19.033	19.691	19.24	22.522	17.703	7.348	6.856	18.736	14.14	22.658	25.462	14.369	28.221	20.449	13.696	26.2559	12.2886	14.526	17.1935	8.49494	4.73611	6.10758	7.19679
743	35.921	33.424	30.063	35.218	24.011	14.423	17.646	16.91	13.373	14.814	16.74	17.821	10.402	5.665	12.876	4.989	13.916	5.901	8.452	5.461	13.141	19.584	19.756	19.163	22.666	17.131	7.337	6.865	18.734	13.74	22.433	26.707	14.08	27.798	21.142	13.137	25.952	12.085	14.5171	17.1973	8.82694	4.76153	6.1755	7.38077
744	35.927	33.317	30.813	35.068	24.36	15.436	17.782	16.67	14.082	14.631	16.767	17.915	10.187	5.823	13.484	5.964	13.87	5.969	8.444	5.752	12.984	18.899	20.171	19.626	22.319	16.757	7.255	7.049	18.578	14.082	22.483	25.937	14.211	27.847	20.378	12.891	26.1716	12.3566	14.4791	17.0711	8.66944	4.59858	6.07993	7.21577
745	36.041	33.666	30.437	35.663	24.092	15.342	17.354	16.678	13.878	15.092	16.966	18.415	9.846	5.07	13.51	5.623	13.881	5.886	8.444	5.907	13.287	19.059	19.631	19.253	22.023	16.658	7.262	6.977	18.665	14.469	22.567	26.036	13.559	28.108	20.691	13.274	26.1591	12.3	14.4029	17.1608	8.87479	4.98271	5.93887	7.2998
746	35.558	33.338	30.178	35.434	23.487	14.853	18.458	17.249	14.021	15.1	16.883	18.431	9.891	5.298	13.194	5.809	13.975	5.992	8.388	5.859	13.077	18.603	19.212	18.496	21.444	16.661	7.316	7.03	18.73	14.464	22.764	25.745	14.086	27.727	20.244	13.078	26.0694	12.3284	14.1707	17.1184	8.5828	4.8866	5.71081	7.16185
747	35.935	33.132	30.377	35.233	24.39	14.863	18.027	17.358	13.824	14.703	16.678	17.752	10.385	5.555	12.792	5.657	13.913	5.852	8.432	5.68	12.797	18.972	19.613	18.397	23.23	17.912	7.253	6.97	18.687	13.993	22.766	25.851	13.715	28.656	20.985	13.798	26.1644	12.1682	14.4798	17.2674	8.60762	4.63501	6.16283	7.38731
748	35.92	33.584	30.85	35.005	23.45	14.733	18.052	16.829	13.824	14.864	16.657	18.133	9.722	4.794	13.124	5.208	13.99	5.878	8.266	5.682	12.691	18.175	18.867	19.006	21.238	16.685	7.281	7.068	18.713	14.141	22.701	25.481	14.383	27.232	20.284	12.833	26.0529	12.0407	14.0478	17.0117	8.79317	5.00468	5.73005	7.05794
749	35.938	33.468	30.65	34.955	24.833	15.301	17.671	16.962	13.886	15.086	16.667	18.273	10.149	5.444	13.79	5.612	13.836	5.877	8.387	6.105	13.163	18.695	19.622	18.358	21.924	17.261	7.25	7.117	18.658	14.427	22.428	25.939	14.023	27.702	20.863	13.22	26.2222	12.3634	14.3228	17.1627	8.64244	4.83401	5.82687	7.1788
750	35.618	33.231	30.402	34.827	23.219	14.966	16.729	16.781	13.914	15.021	16.61	18.009	9.846	5.017	13.168	5.846	13.875	5.791	8.376	5.999	12.96	19.026	19.227	19.23	22.42	16.847	7.344	6.923	18.728	14.059	22.256	24.671	14.04	27.553	21.027	12.997	25.7216	12.1789	14.3751	16.9598	8.79847	4.81859	5.9783	7.03358
751	35.597	33.3	30.291	35.044	24.294	15.12	18.103	16.804	13.963	14.66	16.969	18.413	10.377	5.389	13.219	5.742	13.814	5.77	8.44	5.742	13.114	18.208	20.392	18.831	22.944	17.845	7.34	6.855	18.627	14.187	22.116	25.861	14.15	27.689	21.102	13.435	26.0691	12.3415	14.51	17.1362	8.56717	4.82259	6.16209	7.17414
752	35.569	33.189	30.162	34.805	23.835	14.936	18.339	17.029	13.685	14.712	16.724	18.477	10.312	5.88	13.628	5.414	13.916	5.824	8.434	5.556	12.925	18.305	20.608	18.707	22.314	16.875	7.228	7.043	18.63	13.689	22.538	25.005	14.081	27.172	20.725	13.25	25.983	12.354	14.3464	16.9361	8.48835	4.77776	6.06295	7.01499
753	36.011	33.398	30.286	35.382	23.818	15.464	17.583	17.096	14.037	15.052	17.075	18.589	10.473	5.429	14.011	5.322	13.737	5.688	8.528	6.003	13.164	19.194	19.909	19.557	22.108	16.297	7.312	6.902	18.635	14.234	22.109	24.678	13.982	27.547	20.395	12.516	26.1298	12.4985	14.4185	16.831	8.67758	4.99709	6.01656	7.01505
754	35.505	33.338	30.364	34.805	23.544	14.455	17.684	16.33	14.118	15.284	16.973	18.205	9.936	5.171	12.743	4.727	13.781	5.835	8.386	5.799	12.983	19.333	19.514	19.255	22.191	16.413	7.156	7.059	18.551	14.03	22.722	24.972	14.047	28.157	21.005	12.253	25.7531	12.1446	14.349	16.9952	8.80146	5.10854	6.00629	7.26499
755	35.196	33.498	30.006	34.554	22.879	14.765	17.587	16.807	13.85	14.902	16.944	18.105	10.108	5.874	13.847	5.503	13.724	5.806	8.531	5.794	12.783	18.325	19.624	19.565	22.72	17.16	7.166	7.022	18.423	14.198	22.402	25.325	14.28	28.261	20.739	12.947	25.6615	12.3916	14.4032	17.0763	8.62177	4.76687	6.07042	7.22025
756	35.425	32.957	30.051	34.904	23.811	15.31	17.003	16.814	13.694	14.861	16.866	18.042	10.519	5.764	13.112	5.975	13.799	5.727	8.37	5.539	12.511	19.126	19.362	19.063	21.966	16.683	7.28	6.832	18.491	14.074	22.679	24.505	13.965	27.443	19.431	12.812	25.7844	12.3541	14.2146	16.7512	8.59358	4.61138	6.00779	6.97874
757	35.324	33.354	30.528	34.884	23.946	14.95	17.267	16.14	14.162	14.852	16.984	18.344	9.882	5.158	12.887	5.016	13.826	5.84	8.409	6.104	12.985	18.213	18.882	18.733	22.126	16.32	7.267	6.931	18.624	14.051	22.696	24.601	13.903	28.384	20.636	13.692	25.7991	12.1606	14.1438	17.0785	8.78253	5.05046	5.73919	7.15665
758	35.535	33.125	29.655	34.745	23.25	14.689	17.642	17.399	13.831	14.938	16.927	18.488	9.916	5.237	12.758	5.519	13.778	5.762	8.343	5.864	12.9	18.475	19.839	18.578	22.705	16.584	7.235	7.01	18.512	14.24	22.639	24.924	14.532	27.068	20.02	12.3	25.755	12.2017	14.2828	16.848	8.53874	4.93801	6.00048	6.9768
759	35.521	32.983	29.717	34.629	23.675	14.333	17.459	16.751	13.702	14.625	16.626	18.237	9.799	5.649	12.797	5.668	13.822	5.665	8.451	5.909	12.617	19.462	20.224	18.61	22.535	16.071	7.305	6.887	18.343	14.348	22.145	24.98	14.185	27.67	20.23	12.654	25.6335	12.1379	14.3366	16.8747	8.67369	4.71842	6.08731	7.04108
760	35.768	33.211	30.012	35.257	24.137	15.379	17.974	16.186	13.967	15.225	16.785	18.309	10.017	4.98	12.517	5.441	13.656	5.821	8.328	5.886	12.958	18.891	19.279	18.517	20.896	16.257	7.316	6.98	18.541	14.065	22.471	25.095	13.81	26.745	20.083	12.351	25.9905	12.1551	14.0489	16.7457	8.67021	4.97533	5.68552	6.96214
761	35.677	33.255	29.812	34.799	24.468	14.829	17.395	16.657	13.899	15.069	17.19	18.561	10.684	6.255	13.726	6.184	13.653	5.792	8.504	5.906	12.758	18.234	19.081	18.689	22.027	16.282	7.132	6.89	18.476	14.319	22.243	24.246	13.804	27.225	20.024	13.39	25.8615	12.696	14.0926	16.7749	8.67307	4.63949	5.77386	6.87495
762	35.647	32.891	30.024	34.684	24.023	14.674	18.352	16.445	13.956	15.039	17.146	18.823	10.9	5.69	13.027	5.508	13.579	5.792	8.298	5.962	12.812	18.871	19.062	18.485	22.564	16.637	7.39	6.882	18.378	14.518	22.686	24.18	14.192	27.265	20.715	12.819	25.8425	12.5111	14.2062	16.9025	8.56849	4.90238	5.92001	6.92106
763	35.225	33.24	29.779	34.658	23.826	14.551	17.159	16.026	13.978	14.933	17.002	18.211	10.493	5.295	13.217	5.642	13.474	5.811	8.342	5.863	12.661	18.198	19.724	18.418	21.305	16.69	7.212	6.998	18.374	14.545	22.394	24.884	13.703	27.445	20.024	13.275	25.558	12.3464	14.0486	16.8854	8.77209	4.84451	5.75263	6.97511
764	35.281	32.945	30.086	34.586	23.507	14.212	17.726	16.277	13.631	14.725	16.746	18.228	10.467	5.205	12.771	4.865	13.616	5.754	8.403	5.826	12.764	18.425	19.008	18.873	22.033	17.065	7.241	7.049	18.305	14.085	22.235	24.889	13.14	27.541	21.035	13.282	25.5775	12.0798	14.1767	16.8802	8.7139	4.9479	5.86733	7.07166
765	35.457	32.932	29.867	34.675	23.406	14.492	17.574	17.067	14.079	15.155	17.136	18.288	10.337	5.656	12.951	5.144	13.579	5.643	8.442	6.087	12.642	17.873	19.929	18.536	21.956	16.597	7.273	6.925	18.536	14.164	22.619	23.865	14.579	26.96	19.621	12.677	25.6838	12.3433	14.1284	16.7219	8.59282	4.93055	5.8307	6.7911
766	35.442	32.879	30.226	34.656	23.159	15.085	17.408	15.827	14.241	15.113	16.86	18.504	9.886	5.573	13.273	5.476	13.551	5.83	8.429	6.04	12.697	18.471	19.147	18.514	21.765	15.601	7.287	6.924	18.321	14.354	22.624	24.642	13.611	26.578	19.654	12.751	25.5853	12.3657	14.0045	16.6746	8.72109	4.92113	5.70343	6.84679
767	36.239	34.067	30.462	35.514	23.693	14.672	17.356	15.725	14.668	16.382	17.759	19.106	10.05	5.348	12.997	5.276	14.185	5.89	8.43	6.062	13.48	18.896	19.354	18.211	22.482	16.341	7.764	6.48	18.243	14.974	23.294	24.791	13.567	26.222	19.103	12.643	25.966	12.6982	14.3331	16.7081	9.21389	5.34975	5.83854	6.84205
768	35.171	32.439	29.776	34.484	22.799	14.797	17.591	16.425	13.908	15.159	17.197	18.5	10.796	5.348	12.988	5.126	13.601	5.689	8.367	6.211	12.64	18.835	18.669	18.564	20.914	15.851	7.194	6.903	18.42	14.126	22.305	23.839	13.332	27.921	19.611	12.262	25.4353	12.3778	13.9341	16.5913	8.51384	5.00947	5.58444	7.02073
769	34.363	32.608	29.653	34.188	23.187	14.502	17.572	16.205	13.933	15.048	17.23	18.371	10.22	5.514	12.987	5.495	13.559	5.568	8.472	5.979	12.687	18.968	20.039	18.501	21.464	16.583	7.187	6.912	18.301	14.311	22.177	24.808	14.221	26.825	20.004	13.293	25.2848	12.3497	14.182	16.8039	8.42607	4.9065	5.88193	6.84257
770	34.901	32.505	28.993	33.576	24.101	14.91	17.322	16.516	13.517	14.374	16.792	18.671	10.564	5.677	13.246	5.087	13.515	5.644	8.516	6.047	12.308	18.312	19.66	18.341	22.814	17.06	7.138	6.892	18.375	14.222	22.098	24.61	13.877	27.692	20.072	12.317	25.353	12.241	14.2217	16.7293	8.24964	4.87446	5.98403	7.05256
771	34.848	32.414	29.728	34.128	23.808	14.289	17.511	16.248	13.456	14.657	16.578	18.207	10.346	5.618	12.847	5.093	13.638	5.638	8.426	5.929	12.502	18.402	20.054	18.776	21.37	16.05	7.098	6.904	18.418	14.18	22.296	24.558	13.689	26.424	19.397	12.015	25.3717	12.1002	14.0785	16.4979	8.49662	4.78799	5.82909	6.85535
772	35.136	32.7	30.118	34.769	24.239	14.413	18.047	15.665	14.331	15.576	17.348	18.818	9.615	5.811	13.271	5.479	13.441	5.594	8.455	6.392	12.678	17.999	20.494	18.382	21.215	15.684	7.122	6.891	18.427	14.665	22.856	23.831	14.478	26.949	19.855	12.693	25.6359	12.5311	14.0334	16.7767	8.68966	5.05939	5.71155	6.82932
773	35.036	33.219	29.67	34.102	23.722	14.775	17.764	16.185	13.707	15.011	17.229	18.25	9.597	5.394	12.89	5.798	13.577	5.616	8.384	6.137	12.326	18.198	19.039	18.988	22.107	15.569	7.2	6.908	18.355	14.23	22.405	24.294	13.545	26.888	19.543	12.359	25.5591	12.2345	13.9941	16.5727	8.50777	4.87875	5.7996	6.87753
774	34.414	32.324	29.472	34.048	24.465	14.212	18.646	16.23	14.012	14.78	16.994	18.603	10.102	5.516	13.043	5.787	13.421	5.436	8.308	5.913	12.2	19.208	18.863	18.529	20.936	15.486	7.106	6.733	18.204	14.169	22.611	25.162	14.025	25.908	19.278	12.375	25.4764	12.3546	13.83	16.5571	8.24853	4.8498	5.73514	6.86124
775	34.732	33.035	29.514	33.658	22.592	14.125	18.143	15.874	13.994	15.262	17.027	18.433	9.222	5.551	13.089	5.291	13.43	5.721	8.391	6.342	12.708	17.938	19.288	18.217	21.879	16.125	7.181	6.788	18.335	14.165	22.378	23.769	13.475	27.291	20.036	12.281	25.2091	12.2336	14.0039	16.5699	8.52414	5.01907	5.66166	6.93803
776	35.138	32.779	29.927	33.883	23.204	14.344	17.548	16.004	13.88	15.224	17.498	18.33	9.978	5.699	13.677	5.647	13.531	5.501	8.414	6.301	12.372	18.256	19.909	19.096	21.85	16.915	7.217	6.804	18.131	14.27	22.925	24.767	13.417	26.67	20.106	13.22	25.3534	12.4916	14.2145	16.7527	8.60824	4.91726	5.90894	6.94022
777	34.812	32.498	29.541	33.927	23.231	14.085	18.054	17.229	14.07	15.331	17.074	18.531	9.642	5.371	13.374	5.196	13.52	5.604	8.31	6.288	12.271	18.604	19.652	17.952	21.946	15.42	7.098	6.797	18.171	14.375	22.827	23.61	13.658	26.475	19.275	12.053	25.4221	12.3236	13.9567	16.4339	8.30046	5.07977	5.76831	6.79417
778	34.962	32.681	29.816	34.152	23.336	14.588	17.849	16.779	14.095	15.071	17.677	18.822	10.291	5.421	12.583	6.089	13.383	5.601	8.499	6.169	12.502	18.326	18.949	18.439	22.33	15.61	7.167	6.798	18.241	13.987	22.309	23.716	14.016	27.611	19.854	13.087	25.5204	12.5061	13.9808	16.6786	8.39154	4.95728	5.77006	6.90087
779	34.504	32.161	29.138	33.255	23.887	14.359	17.793	16.953	13.642	14.548	17.137	18.103	10.348	5.673	12.807	5.844	13.413	5.481	8.361	5.843	11.94	19.062	20.869	19.334	21.617	16.48	7.044	6.797	18.312	14.048	22.38	23.661	14.478	27.372	19.453	13.056	25.2563	12.2628	14.24	16.6601	8.08449	4.684	6.14951	6.84209
780	35.12	31.914	29.487	33.477	23.487	14.155	17.057	16.055	13.435	15.03	16.774	18.676	10.449	5.537	12.48	5.289	13.248	5.493	8.338	6.025	12.259	18.148	19.683	17.99	21.531	15.718	7.144	6.744	18.154	13.979	22.12	23.39	14.272	27.656	19.617	12.416	25.094	12.2088	13.8433	16.5492	8.49493	4.89454	5.73942	6.88519
781	34.661	32.5	29.388	33.907	24.045	14.832	16.765	16.623	13.889	14.928	17.011	18.307	10.35	5.846	13.535	5.557	13.312	5.49	8.297	5.848	12.266	17.779	20.456	17.692	21.178	16.322	7.162	6.805	18.261	14.107	22.279	23.714	13.501	26.514	18.317	12.428	25.3401	12.4279	13.864	16.3088	8.36266	4.78133	5.78505	6.70198
782	34.921	32.213	29.275	34.223	23.847	15.148	17.627	15.971	13.711	15.555	17.399	18.507	10.328	5.784	13.128	5.054	13.422	5.602	8.252	6.158	12.315	18.41	19.913	18.261	21.515	15.104	7.095	6.874	18.057	14.335	22.81	24.108	13.922	26.518	19.743	12.385	25.4031	12.4333	13.8952	16.5847	8.33896	5.02149	5.75797	6.83381
783	35.063	31.958	29.14	33.668	23.109	14.049	17.475	16.303	13.823	15.385	17.219	18.667	9.933	6.001	12.509	5.354	13.363	5.585	8.382	6.032	11.946	18.228	18.602	17.58	21.549	14.95	7.141	6.7	18.233	14.173	22.418	23.535	13.47	26.467	18.919	11.907	25.0956	12.3614	13.6217	16.2963	8.43159	4.92968	5.56594	6.76278
784	35.028	32.395	29.239	34.061	23.262	13.652	17.51	16.097	14.22	15.665	17.539	18.579	9.933	5.405	12.451	5.501	13.33	5.65	8.409	6.326	12.455	19.516	19.446	18.553	21.58	15.797	6.98	6.883	18.041	14.092	22.504	23.889	13.855	25.984	19.734	11.713	25.1555	12.4116	14.1062	16.3675	8.63784	5.08746	5.81278	6.76656
785	34.758	32.217	29.557	33.782	23.296	15.009	18.137	16.471	13.757	15.242	17.07	18.63	10.924	5.976	12.698	5.303	13.225	5.447	8.443	6.288	12.177	19.347	20.454	17.404	20.288	15.664	7.042	6.67	18.053	14.136	22.671	23.002	14.083	25.485	18.921	13.401	25.4034	12.45	13.8737	16.3464	8.16316	4.84654	5.69027	6.46565
786	34.549	31.969	29.642	33.654	23.262	14.184	17.872	16.106	13.832	15.107	17.065	18.501	10.757	5.863	12.27	4.986	13.234	5.374	8.446	6.526	12.076	19.421	19.12	18.216	21.501	16.043	6.948	6.712	18.186	14.409	22.604	23.24	13.874	26.377	19.631	13.113	25.1547	12.2976	13.9957	16.5094	8.33167	4.9091	5.76598	6.6889
787	34.591	32.367	29.417	33.824	22.709	13.899	17.244	16.062	13.825	15.216	17.496	18.445	9.988	5.277	12.179	5.594	13.308	5.509	8.527	6.392	12.084	17.966	20.015	16.908	21.122	15.182	7.059	6.812	18.208	14.267	22.573	24.191	14.202	27.113	18.786	12.643	25.0141	12.2525	13.7013	16.5854	8.55366	5.00319	5.5345	6.87081
788	34.595	32.525	29.159	33.525	22.924	13.408	17.157	16.422	14.167	15.53	16.785	18.527	9.848	5.695	11.936	5.609	13.31	5.478	8.363	6.174	11.749	18.728	19.421	18.69	21.042	15.604	6.999	6.676	17.971	14.193	22.478	23.085	13.155	26.555	18.993	12.291	24.9644	12.2621	13.8559	16.2396	8.55596	4.88932	5.74342	6.7405
789	34.417	31.696	29.588	33.8	23.034	14.102	17.427	16.646	14.054	15.32	17.05	18.643	9.854	5.049	12.039	5.875	13.258	5.683	8.311	6.391	11.843	17.649	19.41	18.182	21.575	15.54	6.956	6.954	18.174	14.125	22.145	22.712	14.217	25.848	20.202	12.846	25.0887	12.2355	13.7842	16.4179	8.29556	4.99812	5.6174	6.50383
790	34.478	32.035	29.292	33.731	22.602	13.913	17.047	15.641	13.943	15.535	17.252	18.693	9.782	5.223	13.058	6.155	13.144	5.483	8.425	6.145	12.367	18.533	19.704	17.156	20.273	14.941	7.038	6.829	17.868	14.234	22.847	24.144	14.167	26.996	19.474	13.292	24.8424	12.4551	13.6171	16.6889	8.56312	4.97314	5.48264	6.85701
791	34.531	31.963	28.951	32.931	22.965	13.542	16.836	15.808	13.644	15.26	16.881	18.691	9.327	5.523	12.016	5.637	13.261	5.373	8.444	6.244	11.756	18.445	20.781	17.494	21.122	15.745	7.048	6.775	18.029	14.355	22.628	22.993	14.681	25.701	19.784	13.481	24.6909	12.1224	13.8665	16.5475	8.48226	4.94814	5.79817	6.48425
792	34.103	31.899	29.057	33.167	22.823	14.117	16.896	15.108	13.771	15.47	17.36	18.838	9.346	5.263	12.445	5.105	13.231	5.405	8.41	6.33	11.771	18.94	19.695	17.687	20.696	15.882	6.992	6.671	18.113	14.565	22.258	24.162	14.323	26.452	19.1	12.35	24.6463	12.1997	13.8047	16.4986	8.44583	5.21695	5.65625	6.77399
793	34.079	31.916	28.87	33.006	22.588	13.063	16.873	16.47	13.747	14.932	17.058	18.717	9.55	4.948	11.752	6.225	12.994	5.407	8.242	6.31	11.854	17.737	19.756	17.692	20.412	15.738	6.933	6.767	17.892	13.97	22.539	23.459	14.427	25.614	18.88	13.81	24.6081	12.1161	13.6142	16.4291	8.41107	4.94812	5.52893	6.49536
794	34.019	32.064	29.025	33.518	22.958	13.426	16.713	15.807	14.041	15.318	17.166	18.858	9.507	5.461	11.934	5.417	13.16	5.357	8.407	6.051	11.633	18.064	19.454	17.277	20.393	15.236	6.957	6.717	17.946	14.294	22.699	22.567	14.229	25.497	17.539	12.304	24.6912	12.2128	13.5032	16.0749	8.54024	5.08283	5.50161	6.42868
795	34.734	31.756	29.417	32.963	23.724	14.174	17.534	15.092	13.691	15.407	17.443	18.661	9.853	5.558	12.759	5.198	13.158	5.547	8.231	6.291	11.975	17.545	19.602	17.812	21.155	15.352	6.967	6.904	17.85	14.481	22.142	22.655	14.111	26.157	19.096	13.185	24.9243	12.3212	13.6668	16.3548	8.41773	5.07921	5.57141	6.45548
796	34.197	31.997	28.779	33.091	23.573	13.412	17.328	15.804	14.279	15.737	17.36	19.235	9.726	4.812	12.49	6.14	12.973	5.493	8.272	6.32	11.958	18.327	19.353	17.582	20.449	14.985	6.885	6.76	17.868	14.659	22.514	23.708	13.531	25.156	18.393	12.767	24.7726	12.4724	13.5712	16.2241	8.38892	5.20805	5.48042	6.5081
797	34.37	32.201	29.435	33.236	22.672	12.824	17.684	15.71	14.073	15.639	17.287	19.157	9.517	5.623	11.221	5.119	13.126	5.16	8.33	6.489	11.805	17.674	19.569	17.165	20.858	15.481	6.981	6.466	17.769	14.427	23.035	23.261	13.592	25.638	18.767	12.276	24.7665	12.2045	13.5657	16.2212	8.62073	5.22585	5.51926	6.66484
798	34.443	31.964	29.286	32.886	23.045	13.733	16.767	16.553	14.069	15.703	17.42	19.276	9.05	5.075	11.745	5.844	12.977	5.245	8.218	6.67	11.722	18.507	19.725	18.348	20.926	15.133	6.938	6.728	17.952	14.715	22.732	22.293	14.718	26.22	18.93	13.525	24.8346	12.2728	13.7471	16.4751	8.34873	5.26896	5.68286	6.47232
799	33.93	32.217	28.801	32.946	22.142	13.781	16.387	15.849	13.892	15.316	17.819	18.759	9.574	4.877	12.465	5.444	12.993	5.533	8.332	6.37	11.989	18.682	19.701	17.569	20.028	14.669	6.934	6.565	17.841	14.726	22.576	22.424	13.894	25.856	18.895	12.155	24.5066	12.2683	13.5866	16.1866	8.44671	5.25581	5.4704	6.54156
800	33.835	32.567	28.967	33.643	22.433	13.719	17.22	14.723	13.773	15.794	17.668	18.806	9.621	5.602	12.759	5.431	13.096	5.182	8.342	6.386	11.797	18.068	19.203	18.067	21.214	14.555	7.049	6.621	17.724	14.413	22.496	23.199	13.502	25.204	18.545	12.475	24.6384	12.4317	13.591	16.1228	8.65782	5.13832	5.61991	6.47479
801	34.196	31.895	29.439	32.802	22.327	13.239	18.151	15.412	14.536	15.574	17.451	18.713	10.087	5.674	12.057	5.247	12.952	5.463	8.155	6.462	11.471	17.402	20.334	17.215	20.141	13.361	6.938	6.768	17.739	14.341	22.667	22.398	13.49	25.654	18.172	12.94	24.6826	12.4174	13.2956	16.1107	8.41921	5.09724	5.4421	6.42882
802	34.005	31.254	28.668	33.269	22.38	13.56	17.141	15.261	13.721	15.113	17.545	19.006	9.531	5.082	11.954	5.938	12.742	5.474	8.189	6.33	11.769	19.212	19.123	17.864	20.682	14.962	6.976	6.599	17.629	14.229	22.784	22.654	13.498	25.472	18.09	12.736	24.4422	12.2363	13.6347	16.0667	8.39978	5.1094	5.62168	6.47093
803	34.091	31.656	28.388	32.535	22.754	12.879	16.667	14.505	13.28	15.167	17.351	18.749	9.984	4.789	11.742	5.24	12.691	5.305	8.45	6.25	11.09	18.283	19.381	17.851	20.996	14.502	6.902	6.472	17.66	14.095	22.581	22.59	14.103	26.995	18.346	12.842	24.1844	12.0377	13.4799	16.2586	8.63075	5.17778	5.62998	6.71628
804	34.412	31.651	28.726	32.917	22.252	13.303	16.322	15.807	13.853	15.699	16.977	19.047	8.705	5.114	11.725	5.412	12.953	5.305	8.318	6.566	11.379	18.091	19.902	17.263	20.699	14.694	6.762	6.698	17.824	14.808	22.418	21.954	13.679	24.74	17.494	11.98	24.4237	12.0665	13.517	15.8357	8.54331	5.25443	5.54137	6.26413
805	34.431	31.588	28.739	33.019	23.079	14.294	17.296	15.297	14.215	15.575	17.509	19.148	9.667	5.976	11.181	4.947	12.981	5.263	8.173	6.345	11.853	17.473	19.71	17.211	20.216	15.053	7.069	6.671	17.535	14.571	22.507	22.709	14.659	24.592	18.378	11.581	24.7179	12.2773	13.4278	16.0272	8.29631	5.21895	5.43636	6.31874
806	33.792	31.956	28.076	32.704	22.533	13.89	17.043	14.947	13.745	14.869	17.601	18.618	8.562	6.089	11.824	5.778	12.717	5.161	8.097	6.361	11.354	17.698	19.971	17.549	20.987	15.157	6.812	6.436	17.728	13.847	21.936	21.496	14.315	25.471	18.774	11.48	24.3676	12.1357	13.5052	15.8295	8.32547	4.9541	5.67262	6.40596
807	34.431	31.749	28.988	32.694	22.781	13.118	18.174	14.918	13.895	15.203	17.558	19.229	9.466	5.646	12.247	5.898	12.697	5.334	8.245	6.599	11.715	18.459	19.592	16.181	20.124	15.122	6.765	6.56	17.695	14.47	22.492	22.064	13.761	24.007	18.123	12.798	24.6066	12.3927	13.4068	15.8735	8.47436	5.0689	5.38585	6.16672
808	34.116	31.885	29.055	32.887	22.929	13.73	17.565	15.378	14.528	15.829	17.492	19.148	8.783	4.947	11.729	5.638	12.782	5.038	8.254	6.741	11.508	17.456	19.151	17.403	21.581	14.698	6.844	6.622	17.986	14.674	22.687	21.579	13.432	25.278	17.854	12.624	24.6931	12.2618	13.4612	15.958	8.34577	5.37723	5.5661	6.33172
809	33.147	31.706	28.941	32.786	22.805	12.735	16.41	15.018	13.747	15.783	17.677	18.566	8.64	5.273	12.595	5.332	12.622	4.992	8.267	6.469	11.668	17.446	18.775	16.732	20.054	13.833	6.837	6.61	17.811	14.483	22.509	21.948	14.801	25.008	17.487	12.534	24.1935	12.2016	13.0858	16.0028	8.54376	5.26087	5.25489	6.25624
810	33.974	31.656	28.949	32.623	22.692	13.805	17.112	14.23	13.551	15.676	17.349	19.351	10.296	5.781	11.102	5.764	12.654	5.077	7.996	6.456	11.556	18.51	20.048	16.336	19.786	15.542	6.78	6.489	17.613	14.251	21.922	22.566	14.363	23.939	19.603	11.42	24.3801	12.3587	13.3961	15.8946	8.48809	5.05416	5.52719	6.31458
811	33.677	31.461	28.374	32.171	22.454	13.252	16.551	16.027	13.779	15.533	17.811	18.848	8.883	4.745	12.211	4.79	12.719	5.076	8.122	6.359	11.217	16.969	20.28	15.739	19.569	14.243	6.778	6.554	17.601	14.076	21.91	21.89	14.29	24.357	17.864	12.328	24.2459	12.075	13.0293	15.7648	8.2088	5.48562	5.32173	6.14027
812	33.196	31.433	28.063	32.748	22.509	13.012	16.41	14.841	13.655	15.405	17.081	19.031	9.759	5.78	11.647	5.266	12.926	5.201	8.011	5.787	11.207	17.631	20.086	16.252	19.307	13.323	6.943	6.385	17.709	14.602	22.245	22.266	15.119	25.323	17.606	12.22	24.0265	12.203	12.9731	16.0418	8.4287	5.04886	5.40648	6.3435
813	33.323	31.079	28.236	32.024	22.773	13.189	16.442	14.762	13.774	15.42	17.311	19.051	9.467	5.686	12.309	6.64	12.573	5.212	8.122	6.272	10.906	17.909	19.414	17.625	19.943	14.29	6.882	6.562	17.556	13.995	22.102	21.098	14.397	25.087	18.164	12.734	23.9785	12.4573	13.2266	15.8577	8.28253	4.87269	5.47991	6.16594
814	33.778	32.272	28.927	32.797	22.841	13.793	17.123	15.445	13.743	15.755	17.715	19.279	9.402	5.541	12.172	4.876	12.511	5.161	8.1	6.657	11.84	17.987	19.691	17.641	20.901	14.893	6.809	6.454	17.623	14.345	22.86	22.484	13.395	26.079	18.536	13.071	24.622	12.3104	13.5382	16.1656	8.35473	5.36206	5.59334	6.60962
815	33.511	31.409	28.001	32.799	22.495	14.286	18.084	15.409	13.792	15.458	17.245	18.764	9.962	6.106	12.27	5.285	12.638	5.227	8.048	6.374	10.999	18.711	19.51	17.966	20.181	16.001	6.775	6.538	17.462	14.625	22.364	21.006	14.043	26.107	18.871	13.069	24.4992	12.3602	13.5655	16.086	7.94822	4.94902	5.67658	6.38539
816	33.156	30.932	27.784	32.404	20.93	13.025	16.459	15.665	13.442	15.331	17.336	18.962	9.059	5.861	11.664	6.417	12.408	4.992	8.212	6.361	10.885	19.095	19.396	16.422	20.128	14.409	6.723	6.585	17.379	14.335	22.528	20.917	14.74	24.792	18.498	12.332	23.7944	12.259	13.2308	15.8829	8.21764	4.8873	5.5576	6.18793
817	33.54	31.231	28.472	32.568	22.388	12.641	16.57	16.159	13.841	15.661	18.048	18.538	8.803	4.995	10.691	6.153	12.593	5.078	7.948	6.347	11.33	17.239	19.096	18.147	19.808	13.962	6.657	6.565	17.288	14.128	21.89	20.897	13.728	24.856	17.476	11.661	24.1961	12.0913	13.1548	15.5146	8.32133	5.22687	5.41761	6.1679
818	34.025	31.68	28.33	32.626	23.317	13.493	16.525	15.568	13.623	15.377	17.63	19.207	9.309	5.822	12.401	6.015	12.359	4.956	8.327	6.693	11.167	17.98	18.762	16.008	20.158	14.032	6.804	6.675	17.496	14.549	23.161	20.924	13.88	24.572	18.182	12.549	24.4455	12.423	13.0442	15.8792	8.35712	5.0375	5.26438	6.19937
819	33.603	30.808	28.49	32.265	23.02	13.299	17.884	14.626	14.185	15.57	17.417	19.205	10.18	6.175	12.076	5.914	12.354	5.002	8.218	6.351	10.954	18.394	18.736	16.64	20.247	14.625	6.815	6.645	17.454	14.424	22.417	22.345	13.036	24.147	19.207	12.057	24.2494	12.5903	13.1521	15.8547	8.1704	4.93205	5.43469	6.31308
820	34.131	31.391	28.811	32.851	22.703	13.177	17.569	15.39	14.182	15.902	17.902	18.689	8.63	5.506	11.537	5.428	12.456	5.024	8.084	6.448	11.522	17.021	19.736	16.045	20.672	15.313	6.83	6.44	17.658	14.482	22.336	21.139	14.446	24.268	17.443	11.984	24.5029	12.222	13.2321	15.7026	8.37544	5.2929	5.45362	6.10274
821	33.849	31.862	28.12	32.689	22.063	13.331	17.309	13.323	13.86	15.814	17.588	19.402	9.571	5.407	10.845	5.682	12.335	5.142	8.223	6.53	11.492	17.728	19.251	16.414	19.013	13.553	6.594	6.547	17.375	14.98	22.891	20.666	13.824	23.059	17.993	11.612	24.0682	12.2711	12.9681	15.5541	8.68165	5.26515	5.14977	6.01686
822	33.894	30.883	27.819	32.272	21.994	13.551	16.76	15.322	13.799	15.495	17.391	18.806	9.72	6.044	10.903	5.545	12.612	4.974	8.148	6.589	10.962	17.268	20.453	16.232	19.946	13.588	6.871	6.735	17.534	15.101	21.904	20.651	13.558	24.531	19.277	12.383	24.0619	12.2129	13.0772	15.8545	8.18691	4.98593	5.43758	6.06612
823	33.587	31.167	28.345	32.608	22.184	12.516	16.521	14.568	13.924	16.114	17.711	19.2	9.512	5.038	11.421	5.492	12.543	5.086	7.983	6.486	11.184	17.096	20.154	17.923	19.925	14.053	6.834	6.548	17.297	14.455	22.104	21.32	14.071	25.187	17.889	12.322	23.937	12.3015	13.2433	15.8027	8.58819	5.36795	5.52173	6.2166
824	33.532	31.323	28.633	32.441	22.97	14.155	17.062	15.039	14.31	16.329	17.176	19.446	9.795	5.561	10.9	6.422	12.233	5.039	8.006	6.43	11.159	17.26	17.462	17.297	19.839	14.353	6.736	6.513	17.074	14.683	22.481	20.787	13.689	24.456	17.33	12.345	24.3944	12.4924	12.9078	15.6094	8.12735	5.11325	5.16934	6.0926
825	33.932	31.641	28.253	32.08	22.487	13.772	17.271	15.306	14.075	15.81	17.525	18.897	9.765	5.216	11.132	5.752	12.314	5.141	7.876	6.612	11.386	17.725	20.168	16.014	19.406	13.322	6.84	6.597	17.039	14.878	22.622	20.864	14.597	23.916	18.881	11.399	24.3427	12.2715	12.9964	15.7633	8.1699	5.17045	5.33158	6.10747
826	34.312	31.113	28.12	32.218	22.301	13.535	17.789	14.474	14.112	15.957	18.044	19.378	9.378	4.866	11.569	5.128	12.227	4.849	8.243	6.413	11.216	17.904	19.57	16.004	19.568	13.948	6.878	6.199	17.592	15.003	22.861	20.894	13.83	23.304	17.409	12.577	24.2327	12.304	12.9942	15.6547	8.30432	5.54878	5.33866	6.00362
827	32.92	31.042	27.944	32.518	21.944	13.101	17.393	14.37	13.514	15.573	17.915	19.232	9.428	5.332	11.183	5.092	12.276	5.156	8.043	6.452	10.576	17.804	18.877	16.122	19.182	14.197	6.598	6.568	17.35	14.353	22.621	20.067	13.904	24.201	18.254	12.891	23.904	12.1586	12.8685	15.6807	8.25139	5.36672	5.18778	6.0337
828	33.091	30.113	28.025	31.91	22.082	13.029	16.974	15.015	13.926	15.834	17.783	19.061	8.729	4.914	10.702	5.896	12.314	4.994	8.032	6.559	10.498	17.713	19.697	16.996	20.768	14.296	6.777	6.374	17.022	14.68	22.268	21.672	14.679	24.264	18.069	12.842	23.7799	12.1056	13.1867	15.8647	8.04037	5.3649	5.59461	6.11082
829	33.621	30.438	28.523	33.224	23.012	11.829	16.968	14.074	13.896	15.846	18.117	19.336	8.436	5.107	10.019	5.781	12.405	5.016	7.943	6.589	11.332	17.076	18.829	15.915	18.689	14.32	6.708	6.413	16.876	14.676	22.463	20.893	14.669	21.741	16.644	11.546	23.9611	12.0673	12.8114	15.2629	8.75559	5.50845	5.01547	5.73522
830	33.493	30.493	27.973	31.913	21.604	13.001	15.944	14.208	14.258	15.567	17.899	19.11	8.829	5.821	11.611	5.642	12.223	5.093	8.177	6.656	10.965	16.572	19.409	16.443	19.802	13.579	6.512	6.666	17.377	14.968	22.299	20.564	14.119	24.823	18.564	12.907	23.5786	12.3421	12.8919	15.8799	8.42409	5.22421	5.19559	6.12821
831	33.87	31.406	28.454	32.112	20.431	12.761	17.004	14.802	14.227	15.752	17.334	19.134	9.661	5.679	11.195	4.991	12.081	4.879	7.958	6.418	10.4	18.666	19.674	16.283	20.886	14.854	6.618	6.354	17.353	14.771	22.298	20.359	13.694	24.338	17.085	12.622	23.855	12.2466	13.2099	15.5492	8.53849	5.25216	5.72431	6.04124
832	33.443	31.105	28.037	32.053	22.163	13.278	17.171	15.259	14.05	15.904	17.814	19.063	8.719	6.156	11.98	5.713	12.152	4.764	8.154	7	11.578	17.555	18.985	16.401	19.619	14.533	6.448	6.408	16.979	14.9	22.434	20.048	14.636	24.152	18.339	11.765	24.0636	12.4249	13.0741	15.6109	8.1253	5.15658	5.21001	6.08647
833	33.479	31.527	27.724	31.979	20.829	13.039	16.316	15.141	13.916	15.674	17.647	19.018	8.893	5.517	11.033	5.669	12.456	4.84	8.034	6.33	10.578	17.846	20.527	16.03	18.743	15.137	6.529	6.467	17.202	14.188	22.729	21.049	14.008	25.134	17.422	12.531	23.7542	12.1709	13.0521	15.7259	8.37753	5.22051	5.46443	6.29621
834	33.24	30.681	28.1	32.161	22.032	12.777	17.404	15.436	14.429	16.223	17.832	19.477	8.685	5.366	11.435	4.981	12.194	4.997	7.979	6.771	10.625	16.684	19.744	15.941	19.628	14.572	6.617	6.498	17.024	15.187	22.773	21.038	14.986	23.209	17.381	11.201	23.9789	12.3035	12.9135	15.5914	8.10731	5.57417	5.25335	6.03286
835	33.138	30.22	28.06	32.508	22.114	12.181	17.047	14.095	13.797	15.636	17.56	18.833	9.094	5.235	11.242	5.168	12.258	4.943	8.139	6.309	10.557	15.536	19.475	16.336	18.781	13.643	6.651	6.46	17.093	14.083	22.101	21.488	14.956	23.21	17.931	11.127	23.6704	12.0706	12.5977	15.51	8.45062	5.2844	5.07208	6.04403
836	32.837	30.997	28.177	32.299	22.356	13.48	16.283	14.416	13.878	15.782	17.825	19.148	9.209	5.906	11.445	4.349	12.08	5.002	8.053	6.484	10.984	18.719	18.907	15.225	19.264	14.367	6.625	6.63	17.175	14.103	22.107	20.654	15.062	24.089	17.048	11.901	23.8556	12.1928	12.9085	15.5394	8.26337	5.42915	5.26395	5.97878
837	33.34	30.37	27.443	31.508	21.846	12.986	17.01	13.705	13.635	15.597	17.701	18.56	9.063	5.411	11.6	5.683	12.008	4.87	7.883	6.213	10.379	18.418	20.129	15.835	19.9	14.123	6.563	6.44	17.047	14.745	21.938	20.556	14.219	23.324	17.725	12.34	23.526	12.1562	12.9758	15.4897	8.23784	5.1138	5.61028	5.86628
838	32.92	30.243	27.466	31.384	21.429	12.534	16.038	13.561	13.963	16.137	17.393	19.237	8.929	5.357	10.748	5.181	12.053	4.782	7.96	6.795	10.878	16.725	18.759	14.639	19.447	13.276	6.517	6.433	17.122	15.226	22.107	20.95	14.362	23.394	15.68	11.087	23.1969	12.1181	12.5314	15.2878	8.3697	5.39764	5.01122	5.97804
839	33.254	30.723	27.411	32.387	20.505	12.997	15.791	15.439	13.609	15.796	17.71	19.036	9.596	5.387	10.943	6.763	11.99	4.946	7.845	6.525	10.848	17.542	20.071	15.491	19.745	14.218	6.545	6.539	16.951	14.498	21.811	20.378	14.099	23.855	18.073	11.527	23.5634	12.355	12.9221	15.4276	8.32592	5.01646	5.40339	5.97538
840	33.442	30.386	27.772	31.701	22.166	13.179	18.008	14.904	14.034	16.237	18.1	19.819	10.496	6.405	10.932	5.182	12.177	4.896	7.977	6.876	10.329	16.294	19.194	15.612	20.072	13.633	6.676	6.503	17.023	14.901	22.405	20.548	14.505	23.381	16.906	11.763	23.9447	12.6506	12.706	15.4611	7.9511	5.32167	5.1834	5.90363
841	33.127	30.116	27.701	31.481	20.889	12.65	16.342	15.09	13.879	15.295	18.199	18.968	8.718	4.068	10.974	5.809	12.115	4.887	7.887	6.296	10.106	17.258	18.412	15.786	19.669	13.808	6.566	6.267	16.808	14.21	21.728	20.51	13.746	22.726	17.548	11.794	23.4245	11.9888	12.6224	15.1903	8.14384	5.53478	5.21696	5.81749
842	33.163	30.974	28.127	31.336	21.953	13.076	17.071	15.009	14.563	15.842	18.26	19.34	9.73	6.623	11.267	6.104	12.14	4.92	7.996	6.642	10.754	16.685	19.091	16.17	20.268	15.387	6.728	6.635	16.681	14.762	21.855	18.9	14.727	24.553	16.952	12.258	23.8386	12.7161	13.0053	15.4051	8.06767	5.06607	5.33109	5.81669
843	33.163	30.534	27.817	31.936	20.976	12.876	16.096	14.899	14.102	16.132	18.126	18.995	8.896	5.019	9.657	4.624	12.149	4.7	7.942	6.675	10.655	17.871	18.867	15.304	19.03	14.146	6.527	6.385	16.8	14.737	23.099	20.256	14.938	21.527	17.258	11.577	23.5371	11.9439	12.7339	15.3104	8.28664	5.68442	5.17607	5.78308
844	33.053	30.839	28.32	32.134	21.616	12.99	16.638	13.843	13.708	15.597	18.036	19.049	9.683	4.944	10.058	5.648	11.942	4.558	8.064	6.557	10.733	17.526	19.03	16.928	19.803	14.489	6.667	6.195	16.911	14.504	22.147	20.547	13.64	23.808	17.728	13.142	23.6791	12.0904	12.963	15.5289	8.42612	5.36106	5.41768	5.96509
845	32.865	30.895	27.622	32.095	21.213	13.07	16.153	15.599	14.582	16.102	18.756	19.535	8.747	5.697	10.891	5.284	11.975	4.899	8.049	6.742	11.04	16.282	18.117	14.596	18.162	13.603	6.622	6.504	16.944	14.713	22.713	19.652	13.534	23.934	15.993	11.397	23.689	12.4493	12.3465	15.2006	8.13623	5.61812	4.67184	5.98978
846	32.89	30.237	27.014	31.662	22.338	12.487	16.511	13.97	14.406	15.173	17.951	19.164	9.018	5.342	11.342	4.777	12.059	4.698	7.912	5.942	10.189	17.905	18.585	15.272	19.657	13.665	6.652	6.339	17.089	14.018	23.001	19.971	14.543	23.054	16.222	12.422	23.3886	12.1466	12.5884	15.3311	8.2352	5.45433	5.3426	5.87723
847	33.484	30.399	28.137	31.701	22.169	12.863	17.585	14.058	14.418	16.069	17.822	18.986	8.348	4.687	10.777	4.928	11.998	4.745	7.871	6.532	10.642	17.388	18.998	15.688	19.638	14.384	6.648	6.235	16.557	14.971	22.594	21.15	13.775	23.406	16.486	12.5	23.7995	12.0044	12.7884	15.4322	8.23211	5.64964	5.27928	5.99304
848	32.972	30.983	27.362	31.121	21.308	12.84	15.146	15.022	14.104	16.289	18.467	19.079	8.158	5.095	12.048	5.588	11.976	4.813	8.082	6.207	10.789	17.595	20.444	14.574	18.208	13.638	6.516	6.353	16.826	14.861	22.438	18.344	14.259	23.642	18.82	12.235	23.3442	12.3535	12.6326	15.4294	8.26888	5.57178	5.25442	5.89006
849	33.235	30.121	27.824	32.296	21.482	11.829	16.044	14.358	14.107	15.732	18.116	19.503	9.007	4.929	10.027	5.519	11.847	4.669	8.045	6.487	10.575	17.877	20.014	16.471	20.447	14.483	6.507	6.185	17.053	15.162	22.06	19.551	14.451	23.358	17.749	13.348	23.3986	12.1175	13.0915	15.5424	8.56942	5.56533	5.63904	5.79399
850	33.031	30.79	27.904	31.682	21.038	11.894	17.016	13.974	14.133	15.954	18.18	19.347	8.044	5.053	10.107	5.131	12.161	4.828	7.941	6.976	11.022	16.631	20.12	15.833	18.732	13.514	6.754	6.602	16.698	14.779	21.784	19.774	15.099	23.696	17.572	11.993	23.4161	11.9936	12.7758	15.4751	8.48373	5.69501	5.14028	5.76675
851	33.005	30.803	27.767	32.418	20.444	12.321	15.666	16.395	14.481	16.256	18.777	19.234	8.43	5.461	11.263	6.458	11.844	4.891	8.142	6.498	10.736	17.457	18.897	16.004	19.075	14.27	6.628	6.617	16.966	14.93	22.479	21.193	13.915	22.724	17.847	12.247	23.6024	12.545	12.7814	15.5546	8.34518	5.4368	5.16181	5.88756
852	33.599	30.07	27.503	31.4	21.44	12.037	15.539	14.176	13.759	15.182	18	18.618	8.903	5.235	10.437	5.259	11.706	4.736	7.901	6.441	10.251	17.231	19.032	16.458	20.243	14.602	6.51	6.535	16.626	14.478	21.537	20.544	12.568	22.92	17.529	11.996	23.2205	11.9241	12.8601	15.1243	8.52662	5.29436	5.45304	5.81213
853	32.471	30.678	28.07	31.578	20.758	12.207	16.231	13.796	14.183	16.322	18.541	19.434	8.786	5.332	11.234	5.917	12.154	4.909	8.235	7.088	10.509	17.359	18.468	15.527	18.373	13.9	6.645	6.347	16.981	14.694	22.027	19.489	14.481	23.401	17.227	12.311	23.2236	12.4686	12.6522	15.3603	8.44805	5.50479	4.87393	5.77318
854	32.471	30.493	27.97	31.453	21.884	13.732	16.806	16.073	14.146	16.132	18.418	19.435	9.255	7.117	11.059	5.886	11.957	4.763	8.099	6.708	10.578	17.175	18.006	15.767	19.957	13.601	6.695	6.292	17.095	14.67	22.065	19.72	12.65	23.26	17.578	13.352	23.8603	12.681	12.6611	15.3377	7.64917	5.12813	5.12261	5.80674
855	32.856	30.124	27.336	31.429	20.781	12.193	16.874	13.681	14.121	15.704	17.437	19.255	8.926	5.557	10.239	4.584	11.791	4.536	7.93	6.739	10.719	18.127	20.367	14.161	18.73	13.812	6.553	6.452	16.861	14.962	21.809	19.266	14.419	23.3	15.87	11.789	23.1593	11.9779	12.6912	15.1281	8.312	5.47031	5.35054	5.70163
856	33.129	30.773	28.174	32.001	21.246	12.033	16.525	14.731	14.48	16.143	18.299	19.52	8.984	5.082	11.016	5.453	11.796	4.718	7.958	6.626	11.131	16.427	17.361	15.703	19.173	14.546	6.497	6.33	16.796	14.708	22.262	19.678	13.681	23.028	16.754	13.074	23.5765	12.3721	12.5439	15.2808	8.46674	5.59619	4.89976	5.75024
857	33.565	31.31	28.12	31.828	21.309	12.291	15.564	14.523	14.499	16.754	19.03	19.938	8.283	5.377	10.955	5.602	11.91	4.76	8.005	7.119	10.713	17.556	18.277	15.827	19.411	13.023	6.719	6.617	16.661	15.719	22.462	19.922	13.901	23.066	17.672	11.71	23.5637	12.5548	12.6601	15.4449	8.67654	5.83735	5.05958	5.81459
858	33.491	30.384	27.616	31.422	21.167	12.333	16.133	15.155	14.405	16.149	18.797	20.167	8.833	5.5	10.4	5.802	11.794	4.53	8.094	6.63	10.33	17.478	19.811	15.965	18.124	12.85	6.721	6.407	16.955	14.927	22.278	19.931	15.339	22.195	16.496	11.929	23.4626	12.5066	12.5606	15.3178	8.28902	5.69585	5.2127	5.63752
859	32.128	30.667	27.115	31.577	21.862	13.766	17.765	13.717	13.953	16.368	18.571	19.249	8.817	5.31	10.423	5.515	11.755	4.765	8.183	6.51	10.535	16.281	19.199	16.211	19.333	14.947	6.612	6.485	16.935	15.068	22.349	19.461	13.605	22.386	17.123	12.07	23.5746	12.2758	12.7719	15.2094	7.83856	5.57342	5.20305	5.67327
860	32.588	30.666	27.959	31.711	21.122	12.627	16.956	14.31	14.748	16.718	18.548	20.133	8.724	5.871	10.43	5.71	11.764	4.79	8.223	6.459	11.024	18.87	18.338	14.31	18.84	13.452	6.477	6.675	16.904	15.098	22.321	19.555	14.08	22.272	16.095	11.736	23.4924	12.6102	12.607	15.1213	8.215	5.68431	5.11939	5.63088
861	32.248	30.274	27.336	30.932	20.947	12.762	15.437	13.61	14.028	15.892	18.566	19.286	9.088	5.64	10.087	5.58	11.865	4.59	7.996	6.214	10.218	17.651	20.063	15.398	18.66	14.626	6.454	6.414	16.954	14.839	21.961	18.765	15.476	22.939	17.117	12.101	22.9432	12.2709	12.7281	15.302	8.23348	5.45994	5.39603	5.66134
862	33.016	30.316	28.03	31.124	20.169	12.089	15.738	14.399	14.108	16.118	18.576	19.605	8.146	4.725	10.199	5.836	11.783	4.719	7.93	6.533	10.78	16.548	19.882	17.465	20.66	14.653	6.541	6.388	16.762	14.854	22.623	20.014	14.687	24.514	18.264	13.368	23.1101	12.1641	13.0953	15.8015	8.44161	5.74808	5.61461	6.05167
863	33.278	30.153	27.226	31.202	21.571	11.795	15.771	14.31	14.285	15.848	18.946	20.001	8.048	5.148	10.394	5.172	11.838	4.999	8.007	6.265	10.33	17.066	20.213	14.438	18.357	13.579	6.657	6.511	16.832	14.648	21.921	20.554	14.276	23.376	18.254	11.619	23.1632	12.2303	12.5092	15.4648	8.42691	5.89959	5.16437	5.91079
864	32.629	30.903	27.45	30.705	21.417	13.237	14.911	14.324	14.041	16.168	17.697	19.818	8.535	5.572	9.952	4.707	11.717	4.703	7.869	6.395	10.222	18.417	19.576	15.246	19.117	14.499	6.676	6.569	16.425	14.7	22.339	20.027	14.531	21.698	15.654	11.952	23.197	12.0612	12.7761	15.0571	8.21637	5.67944	5.42579	5.54168
865	33.408	31.288	27.989	31.718	21.091	11.94	17.173	13.16	15.126	16.823	19.305	19.83	8.743	4.92	10.467	6.045	11.83	4.722	8.165	7.069	10.429	16.426	18.88	15.366	18.446	13.381	6.601	6.562	16.715	15.569	22.584	19.475	13.965	22.553	17.625	12.457	23.4709	12.6574	12.4714	15.4106	8.72504	5.88939	4.87599	5.69933
866	33.392	30.174	27.812	31.256	21.701	12.659	16.244	14.738	14.495	16.57	18.802	19.401	8.661	5.425	10.216	6.561	11.811	4.736	7.943	6.254	10.119	18.638	20.975	14.517	19.636	14.079	6.59	6.464	17.033	14.903	22.021	19.043	14.454	22.87	16.807	12.294	23.497	12.5164	12.8708	15.2479	8.20565	5.51833	5.69417	5.63306
867	32.533	29.908	27.533	31.409	19.66	12.362	16.703	13.978	14.258	16.135	18.436	19.23	8.651	4.75	10.066	5.763	11.827	4.497	8.139	6.581	9.992	18.462	19.113	14.401	20.376	15.374	6.718	6.306	17.113	14.44	22.5	18.794	14.877	23.129	17.019	11.38	23.0108	12.1611	12.8762	15.2276	8.23952	5.63285	5.54387	5.79615
868	32.968	30.432	27.383	31.133	20.299	12.854	16.099	14.982	14.389	16.344	18.647	19.741	8.209	4.932	9.99	5.489	11.881	4.809	8.017	6.54	10.204	17.357	19.528	15.013	19.075	12.916	6.623	6.775	16.704	14.916	22.391	18.63	15.498	23.502	17.144	13.016	23.2688	12.2176	12.534	15.5199	8.11984	5.844	5.19739	5.64605
869	33.491	30.833	27.546	31.597	20.443	12.079	15.824	14.366	14.419	16.367	19.363	20.357	8.989	5.618	9.613	5.383	11.903	4.724	7.874	6.723	10.625	16.319	19.485	15.51	18.81	14.388	6.648	6.572	16.689	15.224	22.569	18.636	14.267	22.585	17.585	12.449	23.2724	12.5136	12.6361	15.3224	8.59606	5.92987	5.1071	5.62159
870	32.711	30.416	27.638	31.383	20.475	12.889	16.189	14.366	14.255	16.289	19.074	19.906	8.634	6.414	10.453	5.107	11.975	4.853	8.136	6.893	10.289	16.72	19.091	15.706	18.736	14.225	6.887	6.573	16.547	15.04	22.745	19.026	14.058	22.489	17.122	12.94	23.2584	12.5165	12.6624	15.3427	8.19491	5.68623	5.02495	5.57742
871	33.164	30.33	27.919	30.766	20.18	11.891	15.647	14.842	14.518	16.678	18.745	19.584	7.948	4.998	10.183	6.729	11.63	4.779	8.194	6.724	10.152	17.783	18.939	14.597	18.329	13.375	6.546	6.7	16.563	14.835	22.173	19.927	14.362	22.391	16.215	11.856	23.0924	12.4229	12.4502	15.1568	8.39606	5.68629	5.01413	5.62442
872	32.752	30.893	28.386	30.993	21.207	12.825	16.734	14.253	14.601	16.887	19.281	20.056	8.571	5.317	10.009	5.275	11.75	4.617	8.302	6.779	10.436	16.23	18.468	15.496	19.664	14.286	6.581	6.433	16.736	15.042	22.864	18.689	13.752	22.286	17.042	12.303	23.5054	12.4996	12.6028	15.1728	8.20081	6.00206	5.05778	5.66204
873	32.674	30.495	27.735	31.538	19.735	12.118	15.449	13.947	14.857	16.741	19.421	19.889	8.202	5.211	10.422	5.592	11.782	4.502	8.322	6.877	10.239	18.724	19.324	14.72	17.926	14.132	6.716	6.438	16.951	15.184	22.81	19.301	15.102	21.23	16.389	12.725	22.9614	12.5419	12.6548	15.2846	8.56171	5.97215	5.17224	5.48114
874	32.797	30.11	27.778	31.96	22.32	12.512	16.787	13.891	14.944	16.66	19.253	20.373	9.462	5.564	10.311	5.241	12.044	4.894	8.077	6.963	10.139	15.89	18.758	14.941	17.676	13.607	6.692	6.652	16.911	14.737	22.249	19.847	14.804	22.884	16.992	12.077	23.5194	12.726	12.2989	15.3845	8.27666	5.91945	4.69136	5.69311
875	32.638	30.331	27.661	30.987	20.562	11.855	16.804	13.891	14.301	16.183	18.701	19.669	8.31	5.102	9.441	6.116	11.748	4.567	7.932	6.66	10.298	16.511	18.115	15.284	18.634	14.071	6.556	6.593	16.627	14.453	22.498	19.247	14.961	22.176	16.816	13.178	23.0911	12.2279	12.382	15.3105	8.31182	5.71292	4.92884	5.54108
876	32.454	30.318	27.548	31.037	20.745	12.985	16.521	13.099	14.111	16.57	18.799	19.596	9.105	5.1	9.919	5.463	11.743	4.541	8.242	6.396	10.398	18.167	19.577	14.86	18.781	14.267	6.672	6.409	16.863	14.572	22.036	19.093	15.382	23.361	16.244	13.114	23.0884	12.3329	12.6972	15.3746	8.22487	5.74996	5.3091	5.64532
877	32.362	29.494	27.49	30.699	21.085	11.754	16.328	14.032	14.76	16.79	19.175	19.433	8.967	4.847	10.997	6.642	11.652	4.512	8.223	6.735	9.707	16.317	19.615	15.888	20.335	14.502	6.737	6.372	16.686	14.766	21.798	19.238	16.058	22.43	17.209	13.116	22.9055	12.7014	12.7486	15.441	8.14391	5.64972	5.42939	5.50352
878	33.035	30.686	27.93	30.834	20.333	13.159	16.642	15.099	14.631	16.814	19.079	20.032	8.514	6.103	10.033	5.415	11.8	4.726	8.021	6.688	10.035	16.394	19.297	15.902	19.651	13.575	6.526	6.382	16.671	15.52	23.122	19.981	14.161	21.913	16.807	13.187	23.4647	12.5776	12.6089	15.427	8.02258	5.80899	5.22762	5.70712
879	32.285	30.212	27.629	31.428	20.66	12.916	15.897	14.299	15.16	16.199	18.991	19.709	8.124	5.406	10.725	5.37	11.62	4.655	8.308	6.484	10.106	18.222	19.957	15.535	19.318	12.93	6.647	6.419	16.851	15.305	22.406	18.882	14.824	21.705	16.589	12.651	23.1657	12.4605	12.7135	15.2279	8.13973	5.83475	5.43229	5.47068
880	32.986	29.905	27.534	30.772	20.747	11.285	17.13	14.739	14.753	16.643	19.182	19.755	7.841	5.064	9.867	5.406	11.628	4.76	8.201	6.774	9.7	16.371	19.514	14.995	19.171	12.831	6.658	6.622	16.722	14.89	22.394	18.907	15.114	22.646	16.794	12.527	23.1373	12.3139	12.3945	15.3274	8.22216	6.01789	5.10645	5.57205
881	32.822	30.002	28.117	31.561	20.849	12.188	17.235	15.17	14.959	16.948	19.543	20.283	8.517	5.592	9.808	5.622	11.735	4.633	8.251	7.131	10.181	17.087	19.607	14.422	19.269	13.351	6.69	6.668	16.743	15.298	22.277	19.816	14.49	22.004	16.533	11.835	23.493	12.659	12.5667	15.2354	8.0985	6.02313	5.12593	5.5666
882	32.413	29.908	27.822	31.256	21.659	13.029	17.316	14.918	14.873	16.97	19.134	20.092	9.47	5.184	10.479	5.361	11.796	4.617	8.176	6.657	9.905	17.979	20.606	15.348	19.482	13.296	6.755	6.589	16.669	14.921	22.459	19.36	14.69	23.081	17.341	12.433	23.5401	12.6954	12.7862	15.4298	7.78506	5.91257	5.52378	5.6939
883	32.75	29.77	27.73	31.057	20.738	12.145	16.277	14.31	14.474	16.815	18.925	19.546	8.317	5.536	10.273	6.239	11.798	4.725	8.357	6.822	10.086	17.175	19.095	16.036	19.466	13.339	6.877	6.68	16.593	15.268	22.739	18.143	15.574	22.193	17.092	12.254	23.0971	12.5156	12.6899	15.3413	8.20949	5.65174	5.19504	5.48135
884	32.364	29.648	27.576	31.006	21.116	13.386	17.397	14.479	14.784	17.086	19.477	19.926	9.084	5.71	9.987	5.775	11.949	4.777	8.28	6.865	9.806	17.353	20.14	14.777	19.767	13.363	6.74	6.737	16.853	15.626	22.912	19.018	14.51	21.569	16.08	12.282	23.3715	12.7286	12.7077	15.2327	7.70706	5.8428	5.3437	5.48208
885	31.992	29.809	27.26	31.493	20.819	12.318	15.8	14.696	14.442	16.758	19.241	20.105	8.707	5.583	10.371	6.556	11.796	4.481	8.313	6.489	10.158	17.322	19.685	14.544	19.049	13.265	6.787	6.646	16.857	14.469	22.377	20.151	14.995	22.358	16.685	12.681	23.0234	12.7204	12.5102	15.4006	8.08129	5.69318	5.23318	5.60435
886	32.275	29.572	27.824	30.736	21.779	13.382	16.496	14.689	14.759	16.491	19.152	20.449	8.423	5.682	10.341	5.998	11.912	4.743	8.21	6.65	10.008	17.435	19.226	15.395	19.851	14.141	6.796	6.656	16.85	15.285	22.15	19.895	15.822	22.332	17.583	13.634	23.3441	12.6619	12.7571	15.7003	7.71601	5.83465	5.30615	5.51345
887	32.267	30.264	27.663	30.862	21.001	12.684	16.757	14.785	15.024	17.091	19.66	19.928	8.587	5.324	10.329	5.342	11.918	4.794	8.355	6.555	10.268	17.347	20.134	15.129	19.362	14.006	6.828	6.615	16.82	15.25	22.392	19.173	14.23	21.871	18.239	13.17	23.2854	12.6606	12.7868	15.4588	7.91403	6.05261	5.31709	5.49807
888	32.55	29.903	27.342	30.534	20.118	12.279	16.175	13.053	14.946	16.932	19.513	20.226	8.619	5.714	10.295	5.038	11.974	4.473	8.384	6.573	10.051	17.864	18.549	15.508	18.243	14.053	6.822	6.668	16.742	15.008	22.53	18.902	16.062	21.305	16.412	13.074	22.7442	12.6604	12.5672	15.3525	8.30416	6.04682	5.08306	5.33963
889	32.638	29.824	27.216	30.849	19.995	11.399	16.024	14.001	15.045	16.905	19.397	20.402	8.292	5.256	10.021	6.552	11.925	4.808	8.564	6.879	10.352	18.05	19.144	14.479	19.555	13.628	6.97	6.708	16.836	15.111	22.96	18.493	14.597	22.731	16.629	12.628	22.7432	12.7338	12.7384	15.3663	8.38001	5.94211	5.16976	5.56829
890	32.77	30.126	27.597	30.401	21.616	12.879	17.316	14.134	15.138	17.247	19.379	20.369	8.533	5.885	10.163	5.365	12.046	4.792	8.524	6.91	10.143	18.561	19.527	14.784	19.913	13.773	6.979	6.695	16.811	15.736	22.854	18.397	15.134	22.995	17.168	13.484	23.3549	12.7599	12.8973	15.6253	7.89572	6.02447	5.35991	5.5516
891	32.744	30.038	27.271	30.809	19.987	12.458	16.917	14.936	15.04	17.183	19.676	20.555	8.425	5.579	10.755	5.873	11.905	4.625	8.543	6.598	10.263	17.988	19.91	14.824	19.133	14.169	6.928	6.77	16.974	15.343	22.556	18.675	16.027	22.084	16.534	12.787	23.145	12.8857	12.7958	15.4678	7.98011	6.03605	5.31455	5.41401
892	32.699	29.724	27.191	30.608	21.272	13.259	16.678	14.221	14.954	17.054	19.495	19.951	8.208	6.009	9.689	6.111	11.949	4.628	8.521	6.706	10.091	17.233	19.649	15.43	19.322	14.286	6.86	6.597	16.721	15.452	22.747	18.898	15.478	22.39	16.896	12.935	23.2065	12.6839	12.7815	15.4974	7.83125	5.858	5.25473	5.53245
893	32.121	29.865	27.349	30.866	20.467	12.198	16.601	14.059	15.292	17.028	19.597	20.13	8.084	5.334	10.316	5.28	11.838	4.672	8.573	6.707	10.316	17.227	19.736	15.177	19.394	14.079	6.812	6.694	16.857	15.583	22.202	19.073	15.581	21.48	17.439	13.925	22.9408	12.6326	12.7719	15.5646	8.06286	6.14692	5.23469	5.31794
894	32.429	30.284	27.933	30.74	21.235	12.737	15.906	14.64	15.118	17.117	20.174	20.333	8.276	5.935	10.557	5.671	12.144	4.831	8.564	6.766	10.304	16.593	19.676	15.252	18.926	13.362	7.143	6.781	16.88	15.544	22.929	18.812	15.073	21.525	16.498	12.352	23.238	12.8976	12.6418	15.3537	8.05703	6.07693	5.05294	5.38621
895	32.484	29.696	26.945	30.561	20.69	13.124	16.069	14.452	14.974	16.964	19.672	20.391	8.6	5.48	10.862	6.117	11.943	4.752	8.516	6.71	9.897	17.382	20.431	15.084	19.325	13.78	7.004	6.752	16.701	15.448	22.578	18.533	16.66	22.367	16.843	13.304	23.0026	12.8825	12.782	15.619	7.85123	5.93415	5.34737	5.42051
896	32.394	30.137	27.593	30.8	20.341	12.11	16.689	13.677	15.392	17.511	19.841	20.273	8.609	5.184	9.726	5.515	12.103	4.715	8.687	7.098	10.171	16.79	19.276	15.304	19.613	13.713	7.076	6.763	16.811	15.627	22.813	19.026	15.27	22.594	17.62	12.787	22.9676	12.7564	12.747	15.6387	8.22471	6.23821	5.09406	5.54764
897	32.433	30.129	27.541	31.074	20.579	13.008	16.497	14.47	15.32	17.455	20.094	20.681	8.592	5.66	9.835	6.182	12.043	4.731	8.74	6.676	10.405	17.197	20.302	15.242	20.024	13.947	7.183	6.732	16.825	15.576	22.882	19.095	15.05	21.917	17.394	12.293	23.2164	12.9774	12.9307	15.4947	7.98204	6.14534	5.37807	5.48211
898	32.541	29.965	27.534	30.965	20.762	12.421	17.419	14.164	15.227	17.139	20.024	20.871	8.934	5.698	9.869	6.121	12.039	4.745	8.677	7.11	10.132	17.844	20.132	15.82	20.108	13.734	7.056	6.896	16.73	15.788	22.794	18.749	16.117	22.117	16.882	13.077	23.2214	12.9854	13.0341	15.6206	8.01155	6.09864	5.4161	5.40046
899	32.319	29.547	27.419	30.92	20.616	12.181	17.382	13.996	15.629	17.442	19.81	20.449	8.606	5.543	10.111	6.334	12.107	4.816	8.773	7.242	10.119	16.762	19.737	15.277	19.511	13.853	7.062	6.885	16.864	15.905	22.821	19.139	15.858	23.033	17.722	13.506	23.0475	12.9905	12.8197	15.8795	7.99385	6.04982	5.10575	5.56406
900	32.282	30.366	27.902	30.881	21.3	13.103	17.006	14.171	15.514	17.588	19.93	20.635	8.893	5.957	11.626	6.101	12.187	4.84	8.715	6.88	10.522	17.744	20.399	14.925	19.084	13.551	7.212	6.898	16.73	15.446	23.06	18.668	16.375	22.009	16.705	13.093	23.3764	13.2805	12.8847	15.6196	7.92951	5.96435	5.2424	5.39162
901	32.791	29.925	27.173	30.604	21.272	13.064	16.351	14.337	15.457	17.799	19.649	20.542	8.682	5.788	9.974	6.628	12.097	4.814	8.833	6.938	10.321	17.347	19.562	15.648	19.339	13.403	7.198	6.876	16.793	15.708	22.65	19.286	15.403	22.437	16.728	13.96	23.1896	13.0649	12.8302	15.7039	7.92585	5.98261	5.14393	5.39612
902	32.124	30.075	27.688	30.865	20.629	12.918	16.891	13.952	15.416	17.519	19.724	20.791	8.711	5.427	10.088	5.793	12.172	4.909	8.834	7.029	10.123	17.688	19.54	15.966	19.571	13.69	7.26	6.96	16.897	15.644	22.858	18.732	15.92	23.193	17.395	13.69	23.1427	12.9336	12.9522	15.8549	7.95909	6.19102	5.21337	5.50105
903	32.634	29.931	27.318	30.531	20.697	12.98	16.937	15.006	15.536	17.207	20.022	20.699	8.81	6.005	10.69	6.063	12.098	4.768	8.774	7.106	10.261	17.863	20.388	14.945	19.802	14.003	7.308	6.877	16.858	15.867	22.819	18.523	16.177	22.417	16.78	13.58	23.2542	13.129	13.0008	15.7206	7.76498	6.00624	5.35379	5.36751
904	31.939	29.446	27.493	30.69	21.068	12.724	16.837	14.425	15.329	17.668	19.918	20.609	8.196	5.578	9.809	6.315	12.057	4.829	8.886	6.877	10.131	18.346	19.947	15.223	19.363	13.822	7.24	6.93	16.819	15.613	22.853	19.521	15.405	21.783	17.15	13.248	23.0777	12.9277	12.9481	15.6562	7.76046	6.164	5.3043	5.38202
905	32.398	29.002	27.418	30.556	20.438	12.179	16.806	14.037	15.316	17.437	19.965	20.623	7.826	5.664	10.176	6.096	12.121	4.844	8.867	7.18	9.978	17.843	19.982	14.945	18.678	13.528	7.2	7.037	16.866	15.832	22.644	19.255	15.201	22.151	17.489	13.33	22.8543	12.8879	12.7966	15.7005	7.95655	6.18522	5.11501	5.37705
906	32.086	29.842	27.515	30.689	20.907	13.37	17.075	14.729	15.455	17.397	20.088	20.947	8.862	6.03	10.101	6.497	12.069	4.832	8.829	6.957	10.234	17.096	19.898	15.02	19.894	13.986	7.321	7.021	16.784	15.757	22.684	19.014	15.669	22.02	16.999	13.07	23.2766	13.1721	12.8815	15.6339	7.64287	6.03461	5.22757	5.32263
907	32.335	29.574	27.298	30.857	20.162	12.255	17.035	14.657	15.547	17.678	20.116	20.859	8.45	5.606	10.223	5.928	12.072	4.849	8.984	7.023	10.25	17.713	20.052	15.503	19.566	13.738	7.245	7.032	16.79	15.81	22.909	19.228	15.684	22.227	17.064	13.073	23.0216	13.0509	12.975	15.7062	7.92156	6.25471	5.25541	5.41193
908	32.298	29.567	27.313	30.505	20.25	12.567	16.599	14.531	15.551	17.755	20.26	20.741	8.51	5.647	9.928	6.531	12.169	4.858	9.005	7.146	10.214	17.557	20.464	16.014	19.254	13.907	7.261	6.98	16.795	15.767	22.871	18.529	15.935	23.183	17.247	13.95	22.9537	13.1154	13.0588	15.8518	7.87033	6.17777	5.27506	5.46871
909	31.981	29.677	27.276	30.51	20.276	12.407	16.361	13.934	15.236	17.44	20.086	20.713	8.805	6.126	10.196	6.12	12.042	4.833	9.004	7.093	10.13	17.664	20.865	15.131	19.308	13.776	7.253	6.97	16.901	15.78	22.973	18.893	15.869	21.687	17.331	13.527	22.8027	13.0903	12.9846	15.7184	7.97777	6.02846	5.3256	5.32663
910	32.266	29.482	27.724	30.489	20.554	12.77	17.006	14.261	15.507	17.577	20.068	20.867	8.587	5.984	9.96	5.959	12.054	4.786	8.939	6.986	10.09	17.506	20.564	15.882	19.753	14.001	7.208	6.902	16.615	15.986	23.063	17.919	16.256	22.21	17.955	13.59	23.069	13.0636	13.0561	15.7704	7.83009	6.17095	5.39434	5.39292
911	31.967	29.079	27.238	30.427	20.513	12.034	17.047	14.151	15.447	17.552	20.016	20.832	8.555	5.928	10.091	6.224	12.134	4.872	9.164	7.142	10.159	17.701	19.976	15.411	18.956	14.13	7.446	7.074	16.835	15.808	22.779	18.89	15.464	22.759	17.231	13.577	22.807	13.0806	12.9645	15.7863	7.84097	6.11051	5.13411	5.38296
912	32.23	29.609	27.356	30.435	20.436	13.164	16.277	14.039	15.584	17.683	20.255	20.709	8.538	5.93	10.162	6.562	12.173	4.909	9.055	7.255	10.313	17.47	20.871	15.413	19.478	14.023	7.441	7.025	16.811	15.899	23.06	19.025	16.437	22.219	17.836	13.97	22.9432	13.1779	13.096	15.9723	7.85511	6.09232	5.29792	5.37298
913	31.991	29.792	27.463	30.879	20.7	12.572	16.28	14.464	15.599	17.698	20.329	20.78	8.631	5.93	10.522	6.454	12.178	4.779	9	7.201	10.322	18.331	20.992	14.934	19.275	13.868	7.355	6.913	16.625	15.874	22.774	19.137	15.982	21.822	17.052	13.972	23.0176	13.2429	13.088	15.7506	7.93742	6.10223	5.38665	5.29085
914	31.962	29.33	27.388	30.424	20.727	12.782	16.405	14.174	15.497	17.433	20.001	20.843	8.521	5.73	10.174	5.849	12.117	4.822	9.094	7.148	10.2	17.703	19.748	15.312	19.838	13.199	7.32	7.01	16.683	15.896	22.583	18.183	16.207	21.847	17.295	13.212	22.899	13.006	12.9181	15.6236	7.79781	6.19274	5.21464	5.23879
915	32.031	29.332	27.565	30.562	19.918	12.32	16.451	14.047	15.719	17.663	20.113	20.862	8.419	5.822	9.941	6.416	12.208	4.89	9.115	7.021	10.175	17.989	20.546	15.059	19.087	13.507	7.471	6.995	16.684	15.732	22.697	18.469	16.175	21.626	17.034	13.917	22.7782	13.1194	12.9597	15.68	7.98113	6.17187	5.25553	5.17887
916	32.266	29.427	27.733	30.567	20.355	12.287	16.792	14.555	16.076	17.726	20.351	20.988	8.175	5.816	10.547	6.595	12.199	4.809	9.112	7.315	10.285	17.516	20.902	15.954	19.057	13.804	7.42	6.978	16.773	15.991	22.674	18.831	16.303	22.109	17.165	13.958	22.9977	13.2842	13.0953	15.8202	7.91425	6.22125	5.28463	5.27871
917	31.616	29.296	27.417	29.885	20.188	12.261	16.51	14.644	15.601	17.374	20.248	20.61	8.231	5.54	9.948	6.265	12.032	4.814	9.168	6.988	9.952	17.527	20.802	15.408	19.125	13.904	7.383	7.062	16.747	15.767	22.266	18.625	16.496	22.675	17.929	13.955	22.7271	12.9771	12.972	15.8905	7.70314	6.20378	5.3078	5.30713
918	31.915	29.919	27.351	30.315	19.93	12.814	16.511	14.941	15.563	17.856	20.015	20.724	8.45	6.098	10.232	6.4	12.088	4.781	9.033	7.075	10.411	17.42	20.125	15.576	19.454	13.837	7.316	6.943	16.673	15.741	22.894	18.234	16.031	21.605	17.302	13.605	22.962	13.1673	12.98	15.6344	7.74608	6.07522	5.21981	5.24924
919	31.966	29.601	27.515	29.952	20.508	12.694	17.259	15.045	15.522	17.613	20.337	20.794	8.598	5.993	10.57	6.353	12.089	4.802	9.059	7.091	10.082	17.753	20.576	14.859	19.337	13.723	7.361	7.049	16.566	15.784	22.993	18.617	15.911	21.754	17.633	13.697	23.0675	13.2225	12.9371	15.7365	7.57162	6.09901	5.28187	5.28376
920	31.893	29.299	26.821	30.35	19.925	12.367	16.102	14.146	15.474	17.791	20.1	20.815	8.082	5.509	10.044	6.059	12.108	4.785	9.127	6.793	9.912	18.579	20.455	15.742	19.435	13.119	7.441	6.999	16.736	15.761	22.812	18.817	16.423	22.545	17.528	13.863	22.6129	12.9842	13.0055	15.8925	7.88016	6.29936	5.44659	5.36464
921	32.345	29.502	27.23	30.58	20.081	12.722	16.307	14.763	15.723	18.012	20.439	20.876	8.419	5.819	9.82	6.684	11.977	4.801	9.114	7.219	9.981	17.577	21.175	15.422	19.441	14.037	7.413	6.933	16.68	15.981	23.173	18.268	15.672	22.509	16.725	14.037	22.9413	13.224	13.0744	15.7391	7.85338	6.23424	5.39606	5.36634
922	32.119	29.615	27.455	30.583	20.421	12.977	16.941	14.153	15.639	17.796	20.459	20.582	8.857	6.031	10.23	6.259	12.068	4.755	9.168	6.979	10.046	17.971	20.659	15.429	18.954	13.751	7.371	6.912	16.801	15.895	22.658	18.609	16.242	22.256	17.455	13.709	23.033	13.2316	12.978	15.7908	7.80428	6.11211	5.31028	5.32253
923	31.923	29.061	27.474	30.344	20.283	12.405	16.789	14.583	15.574	17.504	20.227	21.02	8.152	5.705	10.22	6.003	12.029	4.828	9.089	6.852	10.017	17.445	20.507	15.419	19.448	13.704	7.267	7.02	16.58	15.858	22.958	18.135	15.615	21.734	17.942	13.384	22.8577	13.0506	12.9338	15.6493	7.73862	6.28885	5.30942	5.29828
924	31.954	29.057	27.935	30.591	20.019	12.555	17.022	14.361	15.728	17.876	20.396	20.807	8.511	5.886	10.672	6.757	12.156	4.766	9.23	7.142	10.09	18.004	20.335	15.466	18.646	13.89	7.41	7.011	16.6	15.742	22.793	18.482	16.257	21.855	16.915	13.524	22.9367	13.3291	12.9725	15.6589	7.81171	6.10802	5.19715	5.24376
925	31.903	29.424	27.714	30.348	19.709	12.695	16.599	14.515	15.905	17.81	20.507	20.735	8.899	6.287	10.07	6.612	12.014	4.769	9.182	7.154	10.166	17.636	20.736	15.493	19.071	13.128	7.355	6.876	16.618	15.608	22.986	18.148	16.189	21.22	17.513	13.733	22.8634	13.3531	12.9349	15.6246	7.80649	6.07144	5.26931	5.22005
926	32.27	29.305	27.372	30.352	19.504	11.906	16.173	14.117	15.508	17.893	20.323	20.977	8.162	5.52	10.145	6.511	12.05	4.756	9.138	7.191	9.97	18.006	19.791	15.337	19.164	12.938	7.342	7.04	16.638	16.034	22.729	18.396	15.49	21.607	17.501	13.615	22.6249	13.1299	12.8341	15.6392	8.09357	6.29024	5.17547	5.21759
927	31.999	28.913	27.485	30.215	20.929	12.835	17.152	14.915	15.605	17.719	20.297	20.714	8.562	5.878	10.18	6.55	12.012	4.679	9.157	7.056	9.93	17.715	20.477	15.354	19.629	13.362	7.366	6.893	16.737	15.919	22.61	18.514	15.934	22.142	17.315	14.113	23.0554	13.1881	12.9371	15.7543	7.51451	6.11202	5.34845	5.27531
928	31.63	29.442	27.255	30.191	20.45	12.115	16.465	14.167	16.036	17.75	20.32	20.674	8.553	6.276	9.634	6.373	11.928	4.75	9.155	6.988	9.981	17.784	20.886	14.756	19.342	13.728	7.33	6.95	16.716	15.754	22.987	19.02	15.925	21.952	16.922	14.186	22.7144	13.202	12.9298	15.7742	7.84541	6.14307	5.35532	5.31921
929	31.783	29.28	27.272	30.277	20.569	12.687	17.355	14.249	15.556	17.811	20.327	20.656	8.249	5.831	9.994	5.709	12.05	4.745	9.162	6.942	9.709	17.679	20.19	15.098	18.901	13.473	7.257	6.877	16.512	15.703	22.42	18.251	15.841	21.372	17.487	13.506	22.934	13.0166	12.7949	15.5226	7.63884	6.30348	5.20602	5.17836
930	32.122	29.755	27.86	30.41	20.578	12.633	16.505	14.691	15.941	18.043	20.86	21.037	8.068	5.748	10.281	6.181	11.892	4.654	9.218	7.103	10.1	18	20.745	15.482	19.269	13.664	7.239	6.898	16.395	16.091	22.97	18.772	16.441	21.588	17.367	14.064	23.0693	13.2699	13.0127	15.7825	7.85489	6.44404	5.36715	5.29774
931	31.539	29.43	27.398	30.066	20.39	12.375	17.063	13.235	15.75	17.68	20.471	20.804	8.605	6.032	10.293	6.401	11.722	4.635	9.188	7.05	9.736	16.914	21.65	15.775	19.692	13.098	7.173	6.888	16.384	15.821	22.984	18.26	17.218	21.535	17.122	14.02	22.687	13.2545	12.946	15.7405	7.86541	6.14595	5.5257	5.28765
932	31.871	29.064	27.356	30.258	19.326	11.921	15.752	13.91	15.596	17.719	20.298	20.743	8.175	5.404	9.817	6.201	11.944	4.701	9.182	6.863	9.673	17.695	20.279	14.921	18.406	12.652	7.196	6.843	16.425	15.934	22.933	18.159	16.073	20.398	16.876	13.611	22.4322	12.9941	12.6316	15.4448	8.07063	6.31959	5.16401	5.13175
933	32.27	29.526	27.639	30.26	20.305	12.652	16.233	14.731	15.586	17.647	20.31	20.998	8.38	6.017	9.526	6.663	11.877	4.593	9.076	6.865	9.768	17.944	20.366	14.269	19.374	13.496	7.24	6.795	16.523	16.027	22.827	17.963	15.847	21.404	16.531	13.708	22.952	13.1409	12.7628	15.4865	7.84897	6.18593	5.33378	5.21036
934	31.954	29.59	27.884	30.86	19.878	11.797	15.435	13.914	15.917	17.885	20.352	21.119	7.334	5.427	8.966	6.002	11.849	4.511	9.063	6.929	9.595	17.014	21.452	15.629	19.109	13.489	6.961	6.679	16.418	15.882	22.928	18.467	16.505	22.676	17.553	13.727	22.664	12.8752	12.864	15.7796	8.30981	6.62157	5.46883	5.52543
935	31.932	29.659	26.997	30.516	19.753	11.709	16.175	12.971	15.368	17.706	20.519	20.896	8.478	5.291	9.172	5.48	11.61	4.507	9.083	6.694	9.493	17.654	20.402	15.015	19.248	13.786	6.864	6.893	16.297	15.815	22.679	18.047	15.905	22.038	17.025	13.502	22.464	12.8637	12.7492	15.5065	8.27632	6.51995	5.38523	5.34007
936	31.931	29.131	27.027	29.963	19.87	12.021	16.688	13.386	15.426	17.31	20.369	20.808	7.432	4.876	9.153	6.636	11.576	4.515	8.845	6.619	9.369	17.08	21.196	13.704	18.366	12.918	6.84	6.535	16.198	15.448	22.467	18.251	15.16	20.556	17.018	13.704	22.5021	12.7513	12.4188	15.2177	7.95231	6.45352	5.32215	5.18947
937	32.538	30.094	28.149	30.701	20.167	12.433	16.508	13.956	15.733	17.947	20.965	21.048	8.12	5.503	9.578	5.589	11.553	4.532	8.483	7.101	9.812	17.685	20.185	14.613	18.645	12.645	6.642	6.558	15.885	15.657	22.681	17.47	16.014	21.419	16.677	12.903	23.0682	13.0604	12.5254	15.1906	8.20023	6.62007	5.21835	5.3387
938	31.839	29.198	26.853	30.141	20.053	11.731	15.575	14.758	15.398	17.261	20.449	20.528	7.52	5.08	8.456	4.883	11.444	4.447	8.498	6.368	9.203	16.781	19.242	14.343	17.829	11.91	6.869	6.641	15.825	15.369	22.492	17.705	14.188	21.423	15.759	13.326	22.5185	12.4469	12.0065	14.9597	7.92162	6.68589	4.98824	5.22309
939	31.906	29.3	26.264	29.369	18.604	11.945	15.174	12.694	15.084	17.097	19.754	20.476	8.192	5.851	9.201	5.293	11.129	4.384	8.298	6.777	8.918	17.831	20.894	13.489	18.374	11.673	6.466	6.389	15.357	15.136	22.36	16.603	14.805	18.201	15.867	12.235	21.907	12.6185	12.1767	14.3419	8.19116	6.20514	5.42616	4.92402
940	31.321	28.542	26.328	29.531	20.035	12.251	15.436	12.758	14.648	16.814	19.847	20.102	6.546	6.28	9.73	6.801	10.78	4.282	8.051	6.924	9.005	16.189	21.245	14.474	17.492	13.06	6.167	6.449	15.576	14.638	22.523	16.512	15.395	20.698	15.653	13.626	22.0253	12.596	12.1502	14.7237	7.86063	5.96669	5.28714	5.21387
941	30.981	28.847	26.468	29	18.049	10.697	15.928	11.914	14.745	16.92	19.718	19.361	7.352	5.278	7.446	4.437	10.572	4.147	7.884	6.219	9.578	16.028	18.409	14.906	18.428	11.536	5.959	6.252	15.088	14.521	22.128	16.028	11.678	20.725	17.101	13.425	21.4855	11.9071	11.7707	14.2905	8.24924	6.43818	5.01874	5.33377
942	31.226	28.59	26.928	29.52	18.817	9.755	16.098	13.283	14.722	16.603	18.965	19.993	7.249	5.277	8.582	6.478	10.704	3.828	8.09	6.541	9.33	15.506	18.376	13.162	15.948	10.923	6.291	6.053	15.253	15.52	21.765	17.193	13.33	19.334	15.074	11.415	21.7771	12.2336	11.2408	14.1228	8.27972	5.98218	4.54554	5.094
943	31.924	29.092	26.686	29.519	20.119	12.567	16.181	13.493	15.175	17.671	19.795	19.773	8.414	5.879	9.493	5.219	10.339	4.071	7.587	6.981	9.353	16.595	20.722	12.564	18.42	10.119	5.859	6.01	14.637	14.883	21.931	17.403	15.333	20.125	15.406	12.621	22.4476	12.6774	11.6751	14.4208	7.78664	6.12191	5.35935	5.24068
944	31.453	28.774	27.106	28.933	17.179	9.438	14.528	11.605	14.574	17.015	19.467	20.148	8.218	4.242	7.211	4.886	10.626	4.172	8.046	6.107	8.717	16.343	19.886	13.318	15.914	10.609	6.179	6.231	14.821	14.62	21.657	15.235	14.758	19.074	14.503	11.964	21.127	11.9701	11.3738	13.9042	8.84969	6.56776	4.94892	4.86901
945	30.951	28.805	26.348	29.761	19.641	11.193	14.889	12.514	14.364	16.754	19.711	20.056	6.019	4.752	7.656	5.005	10.802	4.434	8.061	6.693	8.794	15.699	18.851	13.062	15.792	11.724	5.851	6.285	14.717	14.753	22.123	17.688	14.891	19.004	15.043	12.366	21.7628	11.7896	11.3912	14.2721	8.17682	6.63648	4.53546	5.11473
946	30.809	28.281	26.065	29.109	18.855	9.147	13.899	13.133	15.361	16.556	19.869	19.234	7.665	3.832	7.307	6.962	10.599	4.103	7.826	6.745	9.079	15.632	19.526	13.921	17.51	11.8	5.966	6.048	15.149	14.275	21.579	16.488	15.105	19.358	14.301	12.017	21.1623	12.0983	11.6741	14.0286	8.43325	6.31486	4.95261	5.01941
947	31.593	29.209	27.131	29.62	20.916	12.301	15.737	14.487	15.053	17.046	19.736	20.074	9.014	5.727	8.815	5.835	10.535	4.233	7.713	6.983	9.008	17.11	18.693	12.86	16.975	10.494	6.124	5.976	15.012	15.295	22.468	16.328	14.045	18.673	15.844	10.34	22.6242	12.6625	11.4604	14.0105	7.71071	6.00863	4.83883	5.21619
948	31.194	28.529	26.14	29.2	20.206	11.366	14.827	12.929	15.192	16.367	19.882	20.217	8.092	4.911	8.466	5.485	10.879	4.195	7.938	6.614	9.358	16.765	19.776	13.153	16.453	10.246	6.417	6.248	15.166	14.551	22.192	17.06	13.654	19.704	15.074	11.626	21.7989	12.3265	11.5377	14.1692	7.98077	6.30773	4.94338	5.1087
949	31.261	28.698	27.43	29.449	19.715	11.615	15.487	11.806	15.476	17.532	20.115	20.237	7.566	4.851	9.079	3.75	10.802	4.267	7.629	6.555	9.015	16.878	20.247	13.928	18.886	12.37	5.921	6.305	14.928	15.1	22.218	16.314	14.889	20.161	15.864	12.04	21.9326	12.3257	12.0577	14.374	8.2373	6.79182	5.3949	5.20801
950	30.925	28.339	26.993	29.136	18.941	12.242	15.261	13.162	14.772	17.083	20.12	19.191	8.519	5.79	9.801	6.125	10.939	4.094	7.87	6.252	8.803	15.889	21.004	14.891	17.293	11.965	6.09	6.393	14.853	14.798	21.936	16.329	16.474	19.214	16.376	12.838	21.8749	12.6751	11.9	14.5301	7.7797	5.82546	5.3377	5.02986
951	31.453	29.156	27.325	29.26	19.384	11.567	14.37	13.33	14.993	17.644	19.872	20.529	7.343	5.724	8.172	4.813	10.996	4.459	8.186	6.564	8.343	15.789	18.837	12.711	16.399	11.497	6.239	6.464	15.507	14.759	22.308	15.579	13.611	19.219	15.141	12.234	21.9806	12.3863	11.3781	14.1061	8.20021	6.56521	4.62707	4.97868
952	31.715	28.629	26.368	30.147	18.793	11.187	15.895	13.884	16.108	18.101	20.587	20.913	7.404	5.634	8.129	6.107	11.144	4.217	8.179	6.823	9.418	15.643	19.634	13.209	19.044	12.399	6.391	6.569	15.522	15.824	22.84	16.734	15.973	19.895	16.005	13.047	22.0773	12.8729	11.971	14.88	8.05407	6.68198	5.07889	5.16622
953	31.336	28.897	26.777	29.824	19.391	11.437	15.066	13.287	15.493	18.119	20.441	21.283	7.588	4.729	9.164	6.144	10.911	4.389	8.201	6.492	9.266	16.373	19.777	14.106	17.918	12.085	6.288	6.445	15.466	15.15	21.828	16.45	13.775	21.464	16.546	13.496	22.0019	12.8701	11.9518	14.6908	8.11652	6.71544	5.0597	5.21782
954	31.739	29.443	26.79	29.435	20.364	11.891	16.618	13.023	15.165	16.976	20.493	20.788	8.473	5.309	9.455	5.675	11.238	4.421	8.487	6.593	9.011	17.059	19.374	13.479	17.156	12.365	6.694	6.265	15.588	14.809	22.653	16.049	14.889	19.644	16.153	12.811	22.4129	12.7917	11.9183	14.5555	7.94199	6.35626	4.91416	5.06694
955	32.363	28.689	27.633	29.987	19.198	10.799	15.29	14.255	15.488	18.319	21.223	20.783	7.131	4.937	9.359	5.014	10.809	4.312	8.524	7.202	9.057	15.97	19.936	14.36	20.34	13.621	6.33	6.441	15.279	15.884	22.675	16.763	15.963	20.598	16.833	13.99	22.2767	12.7817	12.4131	15.0756	8.32696	6.95685	5.36528	5.24813
956	32.029	29.29	26.931	29.925	19.583	12.618	15.68	13.112	15.859	17.618	20.59	20.753	7.335	5.686	9.186	6.607	11.067	4.557	8.468	7.096	9.109	15.73	20.53	14.909	18.471	12.849	6.227	6.432	15.495	15.598	23.154	16.827	16.905	22.067	16.55	13.547	22.396	12.9542	12.2786	15.2802	8.03913	6.41654	5.14355	5.55882
957	31.512	28.819	26.661	29.953	18.59	11.57	13.91	12.705	15.44	17.275	20.786	20.91	8.06	4.745	9.295	5.015	11.288	4.437	8.547	6.761	9.008	16.531	18.963	13.048	18.234	11.643	6.554	6.543	15.618	15.529	22.765	17.106	15.723	20.074	16.46	13.449	21.715	12.6908	11.846	14.9821	8.39694	6.72617	4.88641	5.15375
958	32.43	28.734	26.921	29.93	18.821	11.412	16.709	12.433	15.739	17.641	20.997	20.583	7.125	5.485	8.953	5.429	11.282	4.463	8.628	6.983	8.552	16.937	20.725	13.086	17.871	11.814	6.49	6.523	15.594	15.244	22.349	17.368	15.814	20.147	15.161	13.186	22.1738	12.744	12.0341	14.7876	8.30426	6.70458	5.18461	5.10258
959	32.327	28.995	27.726	29.769	19.079	11.565	15.863	13.911	15.605	17.872	21.038	21.137	7.143	5.04	8.101	6.031	11.3	4.371	8.506	7.026	8.863	17.383	19.922	14.633	17.06	11.319	6.521	6.543	15.721	16.14	22.994	17.741	17.025	20.21	16.339	12.992	22.4044	12.7459	12.0383	15.2226	8.176	6.87708	5.05746	5.30435
960	31.439	28.973	27.132	30.174	18.459	10.091	16.677	13.123	15.755	17.176	20.746	20.785	7.885	4.955	8.097	5.673	11.219	4.286	8.64	6.915	8.84	16.133	20.345	14.138	17.405	11.744	6.71	6.381	15.792	15.252	22.503	16.805	15.707	19.929	16.823	12.067	22.0085	12.634	11.9665	14.7969	8.38678	6.68873	5.03111	5.15928
961	31.862	29.159	27.398	30.114	19.406	11.548	15.687	13.616	15.722	17.844	20.824	20.844	8.428	5.579	9.418	5.772	11.26	4.452	8.48	6.961	9.116	17.003	20.889	15.426	18.53	12.575	6.595	6.579	15.559	15.715	22.076	17.003	16.64	21.001	16.186	14.127	22.3488	13.0539	12.4692	15.1481	8.18213	6.48782	5.37661	5.13283
962	31.902	29.047	27.086	29.299	19.025	12.171	15.805	13.831	15.982	17.686	21.006	20.396	8.242	6.174	9.867	6.391	11.124	4.519	8.499	6.815	8.809	18.054	20.142	13.698	18.756	13.007	6.534	6.779	15.52	15.542	22.439	17.835	15.953	20.327	16.305	12.85	22.2707	13.218	12.3423	15.0084	7.8997	6.23349	5.34757	5.15114
963	32.095	29.385	27.486	30.227	18.66	12.021	15.999	14.522	15.921	18.225	21.428	21.283	8.19	5.879	9.038	6.121	11.339	4.301	8.646	7.084	9.306	16.637	20.575	13.927	17.965	11.701	6.797	6.67	15.906	16.066	23.182	15.913	16.234	20.731	16.375	13.132	22.5494	13.2606	12.1481	15.1006	8.05766	6.67395	5.12708	5.22877
964	32.048	29.292	27.282	30.169	20.163	11.389	15.776	13.621	15.917	17.796	21.227	20.877	8.483	5.404	8.803	6.373	11.393	4.275	8.586	6.919	8.779	16.606	20.978	14.552	19.082	12.163	6.63	6.466	15.709	15.535	22.555	16.004	16.426	20.788	16.537	14.614	22.4675	13.11	12.3333	15.1264	8.21091	6.55503	5.42928	5.16018
965	31.841	28.928	28.007	30.233	19.406	11.318	15.508	14.471	16.257	17.667	21.248	21.044	7.507	5.295	9.369	6.418	11.378	4.2	8.673	6.827	9.43	15.567	20.723	14.401	18.891	12.79	6.434	6.497	15.893	15.942	22.621	16.317	16.256	20.749	15.67	13.317	22.464	13.1006	12.288	14.9696	8.16484	6.66644	5.24426	5.21831
966	31.698	29.604	27.802	30.106	19.844	11.368	16.691	13.597	15.803	18.02	21.118	21.031	8.042	5.583	8.881	5.871	11.15	4.342	8.631	6.895	9.057	18.001	20.357	13.244	17.375	11.452	6.634	6.497	15.526	15.846	23.075	17.265	16.082	19.684	15.735	12.303	22.5888	13.0436	12.0504	14.8647	8.14996	6.66358	5.1855	5.21068
967	31.747	29.259	26.863	30.17	19.711	10.983	15.751	13.229	15.907	17.859	21.099	21.117	8.121	5.954	8.613	5.769	11.056	4.254	8.657	7.101	9.182	16.218	20.871	13.676	19.103	12.359	6.635	6.376	15.546	15.599	23.334	16.038	16.454	20.954	15.903	14.398	22.2141	13.0549	12.2477	15.1237	8.28357	6.63863	5.30484	5.31377
968	32.117	28.848	27.409	29.946	19.884	11.942	16.348	14.538	15.838	17.755	21.807	20.783	7.884	6.58	9.362	6.155	11.324	4.381	8.45	7.271	8.791	16.205	20.906	14.197	18.515	12.333	6.799	6.535	15.534	15.597	22.694	16.747	16.904	21.187	16.372	13.638	22.629	13.2705	12.2373	15.2007	7.85355	6.49941	5.24498	5.2392
969	31.877	29.121	27.464	29.994	18.465	12.387	15.877	12.722	15.267	17.684	21.714	21.268	8.433	5.67	8.316	6.086	11.17	4.427	8.593	6.623	8.814	17.426	20.591	13.18	18.558	11.812	6.805	6.582	15.479	15.964	22.442	16.509	16.774	21.417	15.853	14.299	22.2384	13.0547	12.1194	15.2124	8.19448	6.71542	5.33593	5.18473
970	31.512	28.451	26.815	30.019	17.919	10.78	15.289	13.882	15.954	18.024	21.475	20.88	7.832	5.318	7.688	5.373	11.299	4.388	8.793	6.927	8.779	16.289	21.391	13.757	18.238	11.422	6.635	6.554	15.571	15.613	22.522	16.915	16.599	19.763	16.309	13.352	21.8334	12.818	12.1283	14.9833	8.21881	6.96657	5.30811	5.07639
971	32.101	29.071	27.966	30.137	19.001	11.406	16.258	14.044	16.459	18.209	21.397	21.378	7.479	5.746	8.894	4.598	11.34	4.454	8.439	6.827	8.847	16.363	20.43	13.953	17.85	12.634	6.708	6.621	15.48	16.465	23.248	16.545	17.093	21.025	16.091	14.676	22.498	13.02	12.1137	15.3952	8.18836	7.07461	5.11175	5.29332
972	32.184	29.596	27.264	29.734	20.38	11.988	16.053	13.05	16.177	17.9	21.467	21.692	7.895	6.491	9.912	6.833	11.334	4.188	8.715	6.819	9.188	17.77	20.006	12.309	17.7	11.998	6.761	6.435	15.613	15.732	23.084	16.708	16.185	20.287	16.267	13.275	22.5311	13.5459	12.0027	15.0347	8.1505	6.49127	5.13146	5.21052
973	31.639	28.703	26.848	29.79	20.071	11.52	15.202	13.319	15.549	17.449	21.021	21.084	8.254	5.968	8.492	6.271	11.217	4.125	8.914	6.418	8.934	17.142	20.737	14.434	18.35	12.427	6.758	6.441	15.62	15.054	22.355	17.11	15.63	20.615	15.761	14.142	22.1365	13.011	12.2698	14.9486	8.07998	6.47581	5.3871	5.09179
974	32.177	29.658	27.536	30.164	20.227	12.13	15.447	14.356	16.335	18.31	21.887	21.375	7.798	5.796	9.83	5.607	11.136	4.336	8.72	6.943	8.995	17.293	20.845	14.359	18.554	12.488	6.697	6.431	15.488	15.823	23.394	17.04	17.163	20.781	16.941	14.489	22.7119	13.3673	12.3669	15.4247	8.08343	6.87669	5.35938	5.35648
975	31.591	29.209	27.897	30.455	19.04	11.497	16.868	13.952	16.19	18.481	21.15	21.052	7.966	5.673	9.354	6.489	11.281	4.447	8.673	6.793	8.679	17.263	19.987	13.458	17.243	12.241	6.656	6.627	15.603	16.079	23.108	17.391	16.221	19.71	16.091	13.294	22.5636	13.2944	12.0065	15.078	8.08755	6.60621	5.03255	5.16859
976	31.795	28.646	27.388	29.976	18.509	10.66	14.111	13.157	15.738	18.202	21.488	21.201	7.514	4.673	8.125	5.097	11.011	4.265	9.035	6.839	8.808	16.378	19.638	13.748	17.996	12.322	6.416	6.496	15.463	15.275	22.844	16.378	15.952	19.78	15.37	14.202	21.7803	12.7547	12.004	14.8176	8.56563	7.16177	4.97819	5.0981
977	32.378	28.97	27.919	30.086	19.185	10.91	15.201	13.327	16.446	18.474	21.737	21.433	7.018	5.792	8.888	5.131	11.235	4.246	8.688	7.193	8.811	16.215	18.357	14.267	17.751	11.703	6.586	6.582	15.496	15.958	22.979	17.344	15.936	21.039	16.206	13.314	22.247	13.1149	11.8466	15.144	8.52369	7.12895	4.72817	5.30635
978	31.965	28.031	28.038	29.714	18.938	11.715	14.981	13.362	15.959	18.032	20.896	21.398	6.721	4.742	9.108	5.949	11.468	4.525	8.806	6.877	9.221	15.892	19.775	13.388	19.471	11.868	6.691	6.668	15.441	16.342	22.685	15.86	15.833	20.562	15.24	13.488	22.093	12.8506	12.1291	14.881	8.19936	6.96169	5.09378	5.09998
979	31.064	28.099	27.207	29.531	19.073	10.671	16.07	12.787	15.461	17.771	21.135	21.135	6.965	4.952	7.987	5.364	11.275	4.135	8.914	6.809	8.788	17.021	20.087	13.021	18.82	11.563	6.577	6.354	15.582	15.373	22.79	17.087	15.888	19.295	16.005	13.394	21.8128	12.5963	12.0433	14.8345	8.1052	7.0153	5.24413	5.0965
980	31.034	28.391	26.728	29.993	19.337	12.291	16.216	14.218	15.734	18.1	20.906	20.994	7.658	6.274	9.138	6.599	11.288	4.338	8.554	6.775	8.404	16.098	20.343	13.422	18.101	11.714	6.33	6.374	15.219	15.754	22.36	16.197	16.467	20.219	14.652	13.183	22.276	13.1754	11.9037	14.6755	7.59192	6.42886	5.13109	5.13761
981	32.358	29.005	27.26	29.661	18.756	10.667	15.694	13.664	16.331	18.325	21.257	21.029	7.638	5.704	8.282	5.548	11.274	4.235	8.669	7.044	8.652	16.243	18.488	13.176	19.255	10.471	6.6	6.488	15.292	15.648	22.333	16.277	15.594	20.098	15.741	13.317	22.1331	13.0142	11.7507	14.7388	8.37334	6.88546	4.98353	5.03283
982	31.511	29.154	27.058	29.788	18.521	10.864	14.627	13.792	16.125	18.003	21.866	21.19	7.853	5.268	8.148	5.565	10.993	4.24	8.831	7.275	8.998	16.3	20.082	13.436	17.32	11.512	6.313	6.355	15.536	15.956	23.062	16.678	16.724	18.763	14.57	12.371	21.9144	13.0022	11.8987	14.6328	8.32949	7.02622	4.90941	5.18645
983	31.189	28.49	26.926	29.482	18.834	10.984	15.094	13.573	15.873	18.058	21.128	21.014	7.379	5.627	8.996	5.869	11.089	4.038	8.646	6.69	8.411	16.46	20.337	14.889	18.325	12.384	6.366	6.381	15.15	15.037	22.292	15.434	16.362	20.83	16.142	13.923	21.8215	12.993	12.1269	14.7917	8.0767	6.7291	5.31544	5.16498
984	32.229	28.447	27.848	29.688	18.659	11.452	15.797	13.573	16.255	18.016	21.358	21.279	7.477	5.658	8.42	5.451	11.297	4.3	8.924	7.117	8.813	15.92	19.063	13.531	17.822	11.551	6.638	6.343	15.277	16.234	22.845	15.316	16.13	19.545	15.622	14.301	22.2116	12.9893	11.8338	14.8251	8.20328	6.93361	4.76869	5.06199
985	31.073	28.996	26.607	29.322	20.069	10.382	16.354	13.434	16.143	17.944	21.131	20.667	8.021	6.458	8.819	6.735	10.933	4.179	8.873	6.681	9.106	16.52	20.739	13.236	17.491	10.509	6.503	6.292	15.539	15.983	22.852	14.9	15.874	19.091	15.164	12.836	22.0296	13.2398	11.8267	14.5034	8.01831	6.35921	5.15487	5.06286
986	31.372	29.154	27.048	29.888	19.589	11.595	16.241	12.774	16.016	17.957	21.404	21.494	7.814	4.681	8.57	4.762	11.004	4.164	8.743	7.052	8.784	16.319	20.866	14.458	18.788	12.839	6.211	6.28	15.439	15.866	22.873	17.213	16.422	19.691	15.851	14.345	22.2076	12.8373	12.3017	15.0191	8.09527	7.16959	5.34374	5.23117
987	31.969	29.059	27.509	30.457	18.663	11.941	16.375	12.929	16.015	18.726	21.934	21.254	7.937	5.256	9.153	5.339	11.037	4.265	8.302	7.37	8.836	17.663	19.177	12.815	17.249	11.65	6.692	6.363	15.048	15.511	23.041	16.33	16.546	19.692	14.431	12.852	22.3628	13.2018	11.8364	14.6506	8.24855	7.05681	4.91631	5.14709
988	31.284	28.713	26.767	29.57	18.582	11.568	14.763	13.539	15.901	18.233	21.314	21.585	8.483	6.5	8.924	4.539	10.929	4.145	8.498	6.703	8.518	16.047	19.128	13.122	17.754	11.115	6.355	6.374	14.916	15.731	22.913	15.295	16.275	18.526	14.357	13.624	21.8483	13.1849	11.5959	14.4366	8.06734	6.85781	4.89897	5.00643
989	31.558	28.771	27.35	30.144	19.166	11.887	15.143	14.037	15.822	18.196	22.094	20.848	8.339	6.072	7.535	6.11	10.84	4.115	8.562	6.581	8.534	17.606	19.915	14.229	17.787	11.542	6.426	6.232	15.201	15.179	23.007	17.104	15.609	20.83	16.522	13.518	22.257	13.127	11.9711	14.9628	8.03877	6.82627	5.26467	5.35269
990	31.087	28.601	27.746	29.171	17.965	10.883	15.244	13.134	16.027	17.895	21.546	21.166	6.746	5.516	7.603	6.148	10.801	4.354	8.67	6.762	8.671	15.225	19.845	12.222	16.667	10.952	6.292	6.454	15.292	16.05	22.14	15.851	15.891	20.238	14.484	12.937	21.7289	12.8309	11.4169	14.5629	8.22988	7.00829	4.72558	5.08371
991	31.763	28.95	27.059	29.451	18.53	11.671	14.968	13.014	16.229	18.363	21.555	21.474	7.995	5.002	8.033	6.307	10.92	4.094	8.702	6.781	8.987	15.714	19.53	11.43	17.456	10.682	6.336	6.521	15.003	16.221	22.816	15.754	14.468	19.867	14.173	13.508	21.9258	13.1197	11.4296	14.4667	8.2255	6.99546	4.82971	5.10059
992	31.488	28.719	27.103	29.623	18.143	9.784	15.293	11.977	15.856	18.168	21.368	21.334	7.165	5.393	7.319	5.684	10.695	4.093	8.769	6.946	8.554	16.133	20.877	13.058	17.188	12.307	6.241	6.516	15.193	15.441	22.86	15.212	15.491	20.651	14.101	12.849	21.5163	12.7859	11.862	14.4555	8.67671	7.0881	5.1197	5.22175
993	31.666	28.688	26.489	30.106	17.842	12.115	15.699	13.922	16.06	18.325	21.723	21.581	7.752	5.765	9.466	5.603	10.859	4.025	8.572	7.149	8.986	16.295	18.722	12.076	16.998	11.125	6.322	6.276	14.884	16.06	22.495	17.038	15.959	18.859	14.433	12.448	22.0659	13.2844	11.4807	14.4774	7.9637	6.9064	4.66616	5.08588
994	31.875	28.417	27.647	29.804	17.215	11.622	16.184	13.526	15.98	18.3	22.092	21.108	7.378	5.196	8.052	6.38	10.712	4.219	8.636	7.087	8.816	16.578	19.294	12.235	16.384	10.161	6.325	6.329	15.01	15.672	22.648	15.716	16.225	18.247	14.945	12.913	22.0362	13.0607	11.4122	14.403	8.17407	7.03219	4.72766	4.97478
995	31.301	28.041	27.026	30.2	17.462	11.179	15.096	13.747	15.827	17.882	21.478	21.168	7.589	4.08	8.323	6.167	10.674	4.054	8.361	6.959	8.842	16.024	21.392	14.673	19.449	10.972	6.295	6.297	14.582	15.5	22.312	16.067	18.041	18.33	16.351	14.329	21.7565	12.8143	12.14	14.8104	8.18093	7.0463	5.59186	5.04205
996	31.696	28.204	26.73	29.582	18.86	10.939	15.381	12.323	15.887	18.116	21.309	21.054	7.544	5.616	7.46	4.365	11.097	4.169	8.504	6.834	8.281	15.798	18.463	13.146	17.815	11.151	6.588	6.574	14.756	15.457	23.134	16.14	16.402	20.354	15.866	13.962	21.7144	12.6689	11.5258	14.9233	8.29259	7.14227	4.76883	5.18426
997	31.861	28.107	27.559	29.696	18.216	10.56	16.029	14.664	16.532	17.942	21.552	21.381	7.867	4.838	7.699	6.457	10.752	4.166	8.53	6.744	7.92	16.263	19.964	12.708	16.39	10.597	6.267	6.358	14.726	15.805	22.701	14.792	15.388	18.455	14.728	13.381	22.0865	13.0335	11.4034	14.2601	8.09998	7.01167	4.93314	4.94783
998	30.95	28.285	26.844	29.545	18.061	10.29	15.841	11.92	16.014	17.618	21.651	20.727	7.942	5.807	7.899	5.914	10.451	3.996	8.442	6.906	8.691	16.956	19.633	11.989	16.803	11.762	5.89	6.416	14.835	16.014	22.721	15.087	15.608	18.302	15.622	12.307	21.467	12.9465	11.5629	14.2802	8.36576	6.74524	4.94481	5.06716
999	31.216	28.698	27.384	29.346	18.131	10.587	14.059	13.792	15.997	18.024	20.876	20.357	6.344	4.844	7.201	6.135	10.837	4.337	8.485	6.767	8.147	16.139	20	12.726	18.718	10.358	6.031	6.381	15.117	15.442	22.737	15.177	15.308	19.09	15.653	13.841	21.6516	12.4722	11.6514	14.4777	8.34467	6.96656	5.19541	5.0629
1000	31.117	29.032	27.022	28.78	18.065	10.336	15.106	12.602	15.802	18.597	21.58	20.87	6.758	5.521	9.32	4.906	10.287	4.036	8.396	7.592	9.201	16.077	20.613	12.635	17.05	10.991	6.424	6.358	14.504	16.213	22.899	13.883	16.887	20.526	15.031	12.682	21.5075	12.9193	11.6878	14.5407	8.35977	7.05724	4.98184	5.2805
