# Supplementary material for: Molecular basis of wax-based color change and UV reflection in dragonflies
Source: eLife. 2019 Jan 15;8:e43045. doi: 10.7554/eLife.43045 (PMC6353593; doi:10.7554/eLife.43045)
Supplement: Figure 2—source data 4. [file elife-43045-fig2-data4.xlsx]

## Sheet: Oalbistylum-CRAIC
	Male	Male	Male	Male	Male	Male	Male	Male	Male	Male	Male	Male	Male	Male	Male	Male	Male	Male	Male	Male	Male	Male	Male	Male	Male	Male	Male	Male	Male	Male	Male	Male	Male	Male	Male	Male	Male	Male	Male	Male	Male	Male	Male	Male	Male	Male	Male	Male	Male
wavelength	M5D1-1	M5D1-2	M5D1-3	M5D1-4	M5D1-5	M5D2-1	M5D2-2	M5D2-3	M5D2-4	M5D2-5	M5D2-6	M5D3-1	M5D3-2	M5D3-3	M5D3-4	M5D3-5	M5D3-6	M5D4-1	M5D4-2	M5D4-3	M5D4-4	M5D4-5	M5D5-1	M5D5-2	M5D5-3	M5D5-4	M5D5-5	M5V1-1	M5V1-2	M5V1-3	M5V1-4	M5V1-5	M5V2-1	M5V2-2	M5V2-3	M5V2-4	M5V2-5	M5V2-6	M5V3-1	M5V3-2	M5V3-3	M5V3-4	M5V4-1	M5V4-2	M5V4-3	M5V4-4	M5V4-5	M5V4-6	M5V5-1
380	51.6702	54.1729	54.6646	50.6499	53.5882	44.3568	44.9821	44.4714	42.2894	42.506	44.3786	45.5369	50.9953	51.8645	51.8384	49.9164	52.2619	50.4471	51.9706	48.4791	50.7737	53.1151	63.3291	55.2373	55.8255	49.1268	57.8281	23.0766	26.1864	24.8583	20.7494	23.6778	22.7275	23.5071	24.1978	25.8691	23.8124	25.0702	37.6286	35.2384	32.8848	34.5091	36.2545	34.4948	32.8615	28.364	28.7449	33.1866	31.3568
381	51.2403	53.6515	54.2591	50.1996	53.1373	43.621	44.3127	43.8203	41.8003	41.8979	43.5691	44.861	50.3576	51.3005	50.9795	49.2252	51.6238	50.0182	51.6385	48.0867	50.3371	52.8322	62.8901	54.6149	55.3919	48.7211	57.6013	22.6649	25.7927	24.4279	20.3828	23.2402	22.0619	22.9128	23.5141	25.2523	23.3244	24.3663	37.0147	34.5574	32.0798	33.9446	35.8445	34.1347	32.746	28.0217	28.3	32.867	30.6642
382	50.888	53.1633	53.7622	49.7696	52.7525	42.8401	43.7006	43.3762	41.0833	41.3512	43.004	43.9747	49.7239	50.5741	50.2717	48.4519	51.037	49.7779	51.6094	47.8118	50.3014	52.8113	62.1525	53.9679	54.8645	48.3648	57.1988	22.3897	25.0934	23.9817	19.9047	22.6142	21.4801	22.2265	22.7711	24.7199	22.8012	23.9241	36.3429	33.7755	31.3723	33.3519	35.5286	34.0537	32.6059	27.6111	27.9615	32.7216	30.0732
383	50.2474	52.4196	53.3008	49.332	52.2896	42.186	42.989	42.6874	40.3987	40.7367	42.3658	43.3977	48.8926	49.871	49.6476	47.7327	50.2267	49.9579	51.8261	47.9399	50.43	52.7539	61.8268	53.4821	54.7077	48.1875	56.5938	22.1619	24.5308	23.6537	19.6112	22.0091	20.988	21.4977	22.2723	24.0839	22.0532	23.282	35.7892	33.1026	30.6767	32.6743	35.5899	34.0735	32.4395	27.6506	27.8451	32.6475	29.5894
384	49.6543	51.7424	52.6744	48.7122	51.548	41.2671	42.2709	41.8039	39.5332	39.9045	41.5881	42.7422	48.0077	48.9305	48.8329	46.9055	49.2982	49.7595	51.6865	47.7407	50.1494	52.3198	61.6708	53.1599	54.4241	48.1072	56.1713	21.66	24.1749	23.1269	19.1268	21.3433	20.2206	20.8061	21.4853	23.1928	21.3698	22.5592	35.0432	32.2757	29.7107	32.1278	35.3336	33.9431	32.3291	27.5501	27.6704	32.4319	29.2197
385	49.0619	51.1279	52.1183	48.1887	50.9462	40.5342	41.5298	40.9716	38.7726	38.9266	40.7507	41.9013	47.1342	48.1699	48.1698	46.1233	48.527	49.3211	51.6339	47.5369	49.9729	51.9795	61.2196	52.7686	54.0064	47.7601	55.7846	21.2624	23.7904	22.5421	18.6426	20.7275	19.6286	20.0753	20.7579	22.5199	20.7891	21.8778	34.0869	31.4523	28.9279	31.62	35.065	33.6894	32.3042	27.631	27.4566	32.3406	28.6775
386	48.7189	50.7248	51.7258	47.8377	50.4276	39.933	40.8334	40.4908	38.1237	38.1969	40.1887	41.1501	46.5617	47.6121	47.6536	45.6153	47.9795	48.9139	51.3659	47.2386	49.6783	51.8417	60.4902	52.1308	53.3938	47.1657	55.1978	20.8344	23.394	22.0761	18.1501	20.2813	19.0248	19.4914	20.1917	21.9488	20.3083	21.2849	33.5933	30.9596	28.2422	31.0932	34.6695	33.3762	32.0859	27.4767	27.3612	32.113	28.0004
387	48.5831	50.594	51.5302	47.6515	50.2415	39.6855	40.8281	40.2616	37.8668	37.8868	39.9828	40.9733	46.4272	47.5323	47.3533	45.336	47.7157	48.7075	51.0935	46.9445	49.4692	51.5649	59.9577	51.6557	53.1089	46.9701	54.7705	20.6475	23.1622	22.0069	17.9685	19.9879	18.6619	19.2448	19.9366	21.6291	19.9248	21.0438	33.4017	30.7263	27.9221	30.9567	34.5181	33.304	31.7356	27.2974	27.0969	31.8923	27.5277
388	48.4165	50.4264	51.3672	47.5522	50.1323	39.562	40.6122	40.0478	37.696	37.736	39.7054	40.7183	46.2689	47.3952	47.2117	45.0026	47.334	48.5847	51.0206	46.5822	49.4572	51.3593	59.8142	51.4772	52.9206	46.9402	54.6322	20.5825	22.9034	21.8515	17.9167	19.6027	18.4341	19.0623	19.7848	21.4123	19.694	20.8312	33.1889	30.4907	27.6659	30.8391	34.1243	33.1172	31.6699	27.2338	26.9157	31.7918	27.2195
389	48.1782	50.1027	51.054	47.2917	50.0016	39.2816	40.2688	39.7253	37.3397	37.4473	39.3695	40.4187	45.9237	46.9861	46.8738	44.7225	47.0199	48.4297	50.9872	46.5645	49.5153	51.3202	59.8105	51.3873	52.8298	46.9015	54.5851	20.5394	22.6663	21.7273	17.8155	19.4695	18.1115	18.7868	19.5548	21.2379	19.5187	20.6196	32.9581	30.2944	27.2692	30.7129	33.8439	33.0744	31.6128	27.3929	26.8981	31.7456	26.9243
390	48.0119	49.7985	50.8962	47.1704	49.7551	39.0539	40.0769	39.4754	37.0972	37.2653	39.2541	40.3305	45.7875	46.7876	46.7867	44.7072	46.9967	48.3637	50.9121	46.4654	49.3378	51.1817	59.6108	51.1686	52.7731	46.8694	54.3907	20.5972	22.644	21.8029	17.8317	19.4268	18.0059	18.7208	19.4155	21.082	19.4403	20.5946	32.854	30.1154	27.1853	30.695	33.7017	33.136	31.4872	27.4549	26.5573	31.684	26.8159
391	47.9065	49.6002	50.8491	47.0478	49.6199	38.8387	39.8444	39.2442	36.8348	37.0169	38.9518	40.2318	45.5592	46.6199	46.6258	44.5658	46.8291	48.348	50.9142	46.3041	49.3178	51.1497	59.4251	50.8942	52.5655	46.5944	54.1888	20.4907	22.5833	21.6443	17.7373	19.1632	17.9358	18.5601	19.2229	20.8666	19.3049	20.411	32.6661	29.9599	26.9535	30.597	33.6351	33.1199	31.3754	27.4127	26.4485	31.8209	26.6569
392	47.7554	49.2867	50.6628	46.8586	49.5762	38.6283	39.6191	39.0322	36.6948	36.6887	38.7244	40.0619	45.3193	46.4027	46.3292	44.3008	46.6401	48.0856	50.8966	46.3118	49.0836	51.0057	59.142	50.7421	52.4218	46.3532	54.0361	20.4538	22.408	21.5107	17.6172	18.9833	17.7596	18.2817	19.0659	20.7153	19.1275	20.2369	32.6498	29.7573	26.715	30.349	33.4904	32.771	31.1718	27.3917	26.5056	31.7868	26.4477
393	47.64	49.0902	50.4806	46.751	49.4584	38.4842	39.3951	38.8448	36.6496	36.5533	38.5528	39.7763	45.1116	46.382	46.1893	44.104	46.5111	47.9332	50.8924	46.1499	48.9837	50.8709	58.8577	50.5564	52.2555	46.145	53.8823	20.4002	22.3419	21.4689	17.5147	18.87	17.6598	18.1801	18.9815	20.5188	18.9271	20.0312	32.599	29.5257	26.4347	30.3407	33.3684	32.6756	31.0522	27.4482	26.3859	31.7182	26.1001
394	47.5107	49.1525	50.5231	46.698	49.4815	38.4475	39.3882	38.6447	36.5487	36.391	38.4021	39.8226	45.0617	46.292	46.1923	44.1156	46.4923	47.9575	50.8289	46.1012	48.9719	50.712	58.6287	50.1349	52.0307	46.0118	53.4743	20.3172	22.3732	21.4657	17.4453	18.7013	17.6703	18.1809	18.9564	20.4552	18.7997	19.9076	32.5716	29.3335	26.3565	30.5268	33.231	32.563	31.0445	27.2458	26.2054	31.7093	25.7199
395	47.2302	49.0896	50.3711	46.5913	49.2974	38.1666	39.3065	38.4121	36.1722	36.1348	38.188	39.7883	44.8779	46.0725	45.9733	44.0964	46.3145	47.9097	50.7164	46.2099	49.0367	50.6252	58.553	49.8571	52.0429	45.8493	53.1974	20.3466	22.3033	21.466	17.3926	18.6416	17.6168	18.1282	18.8841	20.3553	18.7675	19.7945	32.4216	29.2337	26.1958	30.422	33.2421	32.4952	31.1438	27.1128	26.1125	31.7422	25.5245
396	47.1929	48.947	50.1638	46.509	49.2419	37.984	39.0805	38.38	36.0163	36.017	38.0721	39.5756	44.7857	45.919	45.8566	44.0312	46.2311	47.68	50.709	45.9152	48.8866	50.4723	58.4426	49.5814	51.9795	45.6856	53.1347	20.3067	22.2456	21.4414	17.4375	18.6085	17.5011	17.9408	18.8829	20.1981	18.6151	19.6949	32.3269	29.1274	26.1285	30.4539	33.1461	32.4153	30.9489	27.2171	26.0585	31.7071	25.4012
397	46.9733	48.6651	49.941	46.2777	49.0994	37.7465	38.8012	38.2132	35.8556	35.8485	37.7722	39.2725	44.4181	45.6577	45.7249	43.7067	46.07	47.3839	50.6597	45.6318	48.5899	50.1279	58.1292	49.3203	51.6562	45.497	52.857	20.2659	22.1871	21.4542	17.4679	18.4478	17.4319	17.8041	18.666	20.078	18.4669	19.4972	32.155	28.8428	25.9589	30.3996	33.0608	32.266	30.8228	27.1727	26.0039	31.5956	25.1305
398	46.854	48.3825	49.7926	46.1514	49.0145	37.451	38.5829	38.0104	35.607	35.4969	37.5521	39.1876	44.1682	45.4341	45.4917	43.4859	45.8435	47.3624	50.6935	45.6325	48.6469	50.1296	57.9773	49.0445	51.6447	45.4548	52.7153	20.157	22.0103	21.3872	17.3759	18.2584	17.3054	17.6655	18.6506	19.9744	18.3038	19.3869	31.9855	28.6364	25.7747	30.2467	33.1691	32.3926	30.7783	27.0578	26.0183	31.717	24.9825
399	46.745	48.1372	49.6393	46.0643	48.8518	37.1697	38.3356	37.7281	35.3039	35.2389	37.3004	39.0335	43.9	45.2298	45.3253	43.3323	45.6339	47.3411	50.5995	45.7079	48.7696	50.1622	57.8841	48.8786	51.5363	45.2587	52.7781	20.0582	21.8934	21.2875	17.3111	18.1407	17.1212	17.3322	18.5374	19.699	18.1775	19.1929	31.7702	28.4155	25.5476	30.1352	33.194	32.3718	30.7738	27.0259	25.8204	31.8663	24.7887
400	46.5249	47.9813	49.5207	46.0027	48.756	36.9796	38.2393	37.5658	35.2039	35.1676	37.2046	38.9055	43.8246	45.1094	45.2143	43.1724	45.3701	47.2637	50.5636	45.5717	48.784	50.2141	57.5937	48.679	51.3361	45.0269	52.4512	20.0284	21.9434	21.3007	17.282	18.0631	17.0565	17.3179	18.5116	19.5035	18.1141	19.0677	31.6678	28.2693	25.4983	30.17	33.212	32.3694	30.8213	27.134	25.7503	31.9514	24.5661
401	46.3874	47.9212	49.4385	45.8976	48.6613	36.8494	38.0976	37.3578	34.9647	34.9973	36.9803	38.7179	43.7648	44.8876	45.0681	43.1004	45.2043	47.0896	50.3678	45.4923	48.6258	50.1171	57.1968	48.4346	50.9805	44.8748	52.1438	19.9161	21.9453	21.3595	17.1409	17.8672	16.8717	17.1526	18.259	19.2626	17.9195	18.8641	31.5443	28.1278	25.2418	30.2157	32.9558	32.2126	30.6546	27.1887	25.4955	31.9141	24.2616
402	46.2223	47.6872	49.2992	45.6713	48.5454	36.6132	37.9079	37.1817	34.7835	34.7612	36.7572	38.484	43.4155	44.7022	44.7917	42.9036	45.0112	47.0937	50.2792	45.3704	48.4214	50.1932	56.953	48.0888	50.7549	44.7089	51.9815	19.763	21.7997	21.3027	17.1453	17.7402	16.7564	16.9651	18.0895	19.0649	17.6014	18.6722	31.2603	27.8648	25.0117	30.1109	32.7796	32.056	30.593	27.2546	25.5216	31.973	24.0476
403	46.027	47.4308	49.0979	45.4083	48.3128	36.356	37.5708	36.9086	34.5024	34.4312	36.422	38.205	43.0484	44.4201	44.4989	42.5462	44.7558	47.0481	50.1353	45.0468	48.3688	49.9273	56.6292	47.7686	50.4936	44.4617	51.7548	19.6922	21.6278	21.2095	17.0152	17.6159	16.5222	16.6891	17.936	18.8616	17.3406	18.4338	30.9145	27.5169	24.7759	29.9332	32.7555	31.9269	30.5078	27.2068	25.5931	31.8979	23.7197
404	45.7755	47.0902	48.7746	45.1349	48.0987	35.9233	37.1874	36.5087	34.2921	34.2008	36.1082	37.9494	42.6643	43.9957	44.1355	42.1347	44.3172	46.9356	50.043	44.8921	48.3283	49.7213	56.3266	47.511	50.3244	44.2938	51.3888	19.6063	21.4932	21.1033	16.9043	17.497	16.2739	16.5032	17.8444	18.5368	17.1413	18.2564	30.5931	27.277	24.5034	29.7091	32.6648	31.8066	30.4573	27.235	25.5492	31.8642	23.5371
405	45.4664	46.6945	48.4507	44.8924	47.9033	35.6141	36.8937	36.1539	33.9313	33.8629	35.7437	37.6055	42.1062	43.5363	43.8828	41.7544	43.9592	46.7647	49.9914	44.837	48.3685	49.6761	56.1545	47.2834	50.209	44.2717	51.2922	19.5395	21.3853	20.9605	16.8384	17.3281	16.043	16.3591	17.6694	18.2116	16.9786	18.0271	30.3116	26.9764	24.2761	29.4807	32.643	31.7319	30.5229	27.4199	25.5123	31.8699	23.3691
406	45.2695	46.4928	48.3231	44.654	47.838	35.3816	36.7161	35.9411	33.7027	33.6227	35.5348	37.39	41.8521	43.2734	43.6559	41.4512	43.7552	46.689	49.9148	44.7074	48.2566	49.5803	56.0536	47.1322	50.0722	44.2224	51.1632	19.4241	21.2029	20.9611	16.8329	17.1688	15.9321	16.1969	17.5693	18.0187	16.8201	17.925	30.0961	26.7406	24.0127	29.4064	32.4521	31.5962	30.3593	27.4894	25.4785	31.8602	23.2474
407	45.0393	46.189	48.0522	44.3291	47.6624	35.089	36.4007	35.5421	33.4575	33.341	35.306	37.1338	41.6066	42.9453	43.3139	41.1249	43.4828	46.6795	49.8212	44.5804	48.1527	49.4502	55.7787	46.9144	49.9323	43.9729	50.9419	19.2288	21.0206	20.8771	16.7189	16.9788	15.7396	15.9456	17.3636	17.8116	16.5063	17.7107	29.8486	26.4416	23.7378	29.2875	32.1535	31.4953	30.1465	27.399	25.3761	31.732	22.9821
408	44.9075	46.015	47.915	44.1592	47.5444	34.8277	36.1396	35.2323	33.2382	33.1408	35.0691	36.8966	41.3295	42.7307	43.1135	40.955	43.2557	46.5892	49.7841	44.5809	48.0233	49.2402	55.5962	46.7546	49.7221	43.7342	50.7475	19.1123	21.0041	20.8382	16.6404	16.8753	15.5518	15.8134	17.1977	17.661	16.3087	17.4978	29.6109	26.2107	23.5484	29.2058	32.1039	31.472	30.0664	27.349	25.347	31.655	22.7417
409	44.8547	45.8194	47.8175	44.1323	47.4573	34.593	36.0152	35.0662	33.0152	32.9253	34.7781	36.748	41.0621	42.5775	42.9718	40.7608	42.9791	46.4048	49.674	44.4417	47.8711	49.0642	55.3614	46.4885	49.4235	43.5222	50.4399	19.0324	20.9185	20.7913	16.5832	16.7242	15.3824	15.6331	17.1216	17.5124	16.1651	17.2891	29.3615	26.0028	23.3801	29.1452	32.092	31.3872	30.048	27.2851	25.2816	31.6064	22.5195
410	44.7998	45.6314	47.6011	44.0726	47.3367	34.4089	35.813	34.8905	32.8067	32.7328	34.5409	36.4786	40.8796	42.4132	42.7771	40.5974	42.7884	46.2107	49.516	44.2672	47.8368	48.9689	55.225	46.2745	49.2326	43.281	50.1724	18.9319	20.8359	20.7293	16.5275	16.6141	15.2457	15.4547	16.941	17.2625	16.0458	17.1074	29.2093	25.8013	23.1928	28.9976	32.0366	31.3531	29.9796	27.2924	25.1566	31.5732	22.3436
411	44.6269	45.4305	47.5354	43.9128	47.2086	34.3324	35.5734	34.6549	32.5919	32.6112	34.4174	36.2616	40.7193	42.2282	42.6326	40.3985	42.6505	46.1345	49.3484	44.1364	47.665	48.8285	55.0252	46.0778	49.033	43.0273	49.905	18.9092	20.8167	20.6756	16.4247	16.5267	15.1444	15.315	16.8269	17.1262	15.8608	16.9879	29.0325	25.6573	23.019	28.8725	31.9549	31.2985	29.8216	27.2404	25.0438	31.4932	22.1753
412	44.4451	45.2093	47.3654	43.7749	47.0338	34.1358	35.4151	34.486	32.4477	32.4243	34.2024	36.1047	40.5347	42.0294	42.4883	40.2302	42.4687	46.1439	49.2457	44.0467	47.5657	48.8148	54.8383	45.8775	48.8158	42.8799	49.7784	18.846	20.7279	20.6641	16.3458	16.4195	14.9914	15.1893	16.7093	17.0139	15.7179	16.7911	28.8029	25.5172	22.8906	28.7518	31.7511	31.1503	29.7226	27.2804	24.9733	31.4762	21.9036
413	44.2913	45.0584	47.1922	43.63	46.9176	33.8698	35.1938	34.2382	32.286	32.206	33.9333	35.9551	40.4002	41.8265	42.2701	40.035	42.3109	45.9919	49.1924	43.9333	47.5251	48.6871	54.7561	45.7828	48.6667	42.7527	49.754	18.7731	20.6137	20.607	16.2692	16.3016	14.8837	15.0854	16.6275	16.8758	15.658	16.6453	28.5887	25.3018	22.7469	28.6366	31.5413	31.125	29.7078	27.2821	24.8896	31.5088	21.7709
414	44.2559	45.0354	47.1228	43.5859	46.9062	33.7006	35.1273	34.1543	32.1413	32.1256	33.7513	35.8361	40.2962	41.7018	42.1945	39.901	42.1849	45.7936	49.1307	43.8791	47.4032	48.5364	54.6578	45.7117	48.4858	42.5717	49.6813	18.7849	20.5666	20.4945	16.2481	16.2522	14.7922	14.9849	16.5868	16.7608	15.5643	16.5218	28.4083	25.1454	22.6106	28.5797	31.3641	31.0821	29.646	27.2224	24.8551	31.4193	21.734
415	44.2299	44.9754	47.13	43.5986	46.8627	33.6248	35.1131	34.0543	32.0808	32.1103	33.7024	35.8464	40.2502	41.645	42.2125	39.8769	42.1329	45.6794	48.9936	43.7336	47.2833	48.4553	54.5565	45.5918	48.3117	42.3887	49.52	18.7747	20.5477	20.5015	16.2335	16.2205	14.6931	14.9455	16.5269	16.655	15.4951	16.4326	28.2935	25.0751	22.5131	28.5839	31.2133	30.993	29.4955	27.1524	24.7687	31.2544	21.6256
416	44.1671	44.8339	47.0655	43.5352	46.8824	33.4858	35.021	33.9684	32.0305	32.0288	33.6345	35.8441	40.1886	41.603	42.1662	39.8294	42.0327	45.554	48.6838	43.5871	47.1431	48.2683	54.458	45.446	48.1499	42.1817	49.3255	18.7654	20.4447	20.4842	16.2391	16.1386	14.6516	14.855	16.4359	16.5842	15.4422	16.3566	28.1536	24.9347	22.4809	28.5602	31.1193	30.8666	29.2719	27.0098	24.5837	31.1156	21.4484
417	43.9165	44.6541	46.787	43.3812	46.7772	33.2883	34.8043	33.7394	31.8897	31.8497	33.4374	35.7183	40.043	41.4362	42.0137	39.6835	41.9239	45.4296	48.5585	43.3525	46.9815	48.1586	54.3688	45.3232	48.083	42.0274	49.1904	18.7351	20.3675	20.4063	16.1911	16.051	14.5847	14.7473	16.3988	16.4504	15.333	16.1827	27.9429	24.8654	22.3762	28.5091	31.0588	30.756	29.1946	27.0094	24.4492	31.0142	21.3586
418	43.729	44.4968	46.6367	43.2298	46.6507	33.1123	34.6101	33.5662	31.7199	31.6806	33.2602	35.5722	39.7935	41.2347	41.8797	39.476	41.7035	45.426	48.5723	43.392	47.0073	48.1726	54.2761	45.2183	48.0107	41.932	49.1176	18.6485	20.32	20.3461	16.0956	15.9788	14.4158	14.6264	16.3525	16.2903	15.1938	16.0516	27.7819	24.7283	22.2312	28.3102	31.0155	30.7688	29.1646	27.0066	24.3653	31.0373	21.2874
419	43.5865	44.3927	46.5672	43.1667	46.492	32.9964	34.4759	33.4299	31.5859	31.5589	33.0896	35.4721	39.666	41.1539	41.7234	39.3513	41.6217	45.2502	48.4317	43.2368	46.8608	48.0594	54.1897	44.9597	47.8607	41.8555	48.9592	18.5953	20.2691	20.3608	16.0357	15.9179	14.3085	14.5536	16.3225	16.1808	15.0484	15.9097	27.6208	24.6301	22.0813	28.2417	30.7678	30.6613	29.0323	26.9903	24.2439	30.9863	21.076
420	43.5297	44.3231	46.464	43.1184	46.465	32.8946	34.3564	33.2505	31.5009	31.4827	32.935	35.433	39.5994	41.0394	41.6421	39.2966	41.4724	45.0619	48.2893	42.9994	46.654	47.9403	54.0545	44.7395	47.7196	41.6719	48.7352	18.5564	20.1679	20.3927	15.9635	15.8138	14.2005	14.4105	16.2379	16.0149	14.9534	15.8219	27.396	24.5171	22.0295	28.1564	30.6151	30.4904	28.845	26.8595	24.1841	30.8395	20.8641
421	43.4732	44.2829	46.3975	43.0736	46.3959	32.8359	34.2983	33.1182	31.4421	31.4116	32.871	35.4108	39.4836	40.8934	41.5923	39.2566	41.3846	44.8672	48.2094	42.8807	46.556	47.7949	53.8358	44.5685	47.5931	41.4514	48.5843	18.5187	20.0738	20.3181	15.9693	15.7597	14.1507	14.3082	16.1659	15.9274	14.8874	15.7282	27.2713	24.3909	21.9178	28.1086	30.5245	30.3425	28.7302	26.7629	24.037	30.7516	20.7077
422	43.4612	44.2532	46.3549	43.0496	46.4077	32.7396	34.2933	33.039	31.4138	31.3445	32.8558	35.3676	39.4244	40.8488	41.5279	39.2461	41.3239	44.7265	48.1606	42.8168	46.3727	47.6054	53.6475	44.4651	47.4119	41.2361	48.477	18.4625	20.0176	20.2546	15.9389	15.6897	14.0949	14.303	16.103	15.8675	14.8099	15.6274	27.1888	24.3936	21.8052	28.1142	30.3855	30.2081	28.6579	26.7296	23.9367	30.7207	20.5713
423	43.3219	44.1033	46.2339	42.9872	46.2523	32.6797	34.2269	32.9449	31.3237	31.2174	32.7263	35.2575	39.2894	40.8215	41.4559	39.1027	41.2909	44.6228	48.062	42.6047	46.1463	47.4223	53.487	44.2355	47.287	41.079	48.38	18.3949	20.0149	20.2342	15.8728	15.6661	13.9926	14.2026	16.0443	15.751	14.6974	15.5468	26.9845	24.3797	21.7677	28.0142	30.2918	30.1481	28.4983	26.701	23.8514	30.6313	20.3771
424	43.1327	43.9473	46.0754	42.8238	46.0402	32.4967	34.0078	32.7508	31.0918	31.0206	32.4281	35.0642	39.1208	40.5832	41.1084	38.835	41.0599	44.4815	47.9808	42.385	46.0229	47.3193	53.3354	44.0311	47.1117	40.8563	48.1771	18.2676	19.9215	20.1361	15.7983	15.5048	13.8503	14.0572	15.945	15.5688	14.5916	15.3175	26.7067	24.2423	21.5813	27.8807	30.0794	29.9827	28.3228	26.6588	23.7307	30.4696	20.1902
425	42.8637	43.6859	45.8496	42.5981	45.8512	32.1857	33.7797	32.3942	30.8087	30.8038	32.2719	34.7978	38.7284	40.3039	40.8297	38.5497	40.7865	44.283	47.8555	42.2686	45.7602	47.1749	52.9116	43.7381	46.8081	40.507	47.8524	18.1452	19.7344	19.9363	15.6373	15.3017	13.7043	13.8954	15.8075	15.4123	14.4382	15.1162	26.4349	23.9438	21.2962	27.7111	29.8908	29.725	28.2082	26.6072	23.534	30.3166	19.9139
426	42.7139	43.325	45.5719	42.3609	45.6466	31.8891	33.5049	32.1205	30.6167	30.4735	32.0209	34.5561	38.3956	40.0253	40.5956	38.2595	40.4882	44.0466	47.7124	42.1059	45.5822	46.9999	52.7166	43.4479	46.4935	40.2518	47.5891	17.9702	19.5812	19.7538	15.5268	15.1901	13.5767	13.7671	15.6546	15.2496	14.2791	14.9164	26.2036	23.6559	21.167	27.4637	29.7406	29.5941	28.0916	26.5502	23.4282	30.1419	19.7082
427	42.4573	43.0967	45.3349	42.1569	45.3797	31.6204	33.2287	31.8793	30.3569	30.1791	31.7862	34.2956	38.1489	39.7681	40.3621	37.9662	40.1626	43.761	47.4395	41.8853	45.5374	46.8065	52.6183	43.2527	46.3509	40.1377	47.3841	17.7796	19.3912	19.5431	15.3527	15.065	13.3795	13.6239	15.4663	15.0294	14.0907	14.6825	25.8726	23.385	21.0075	27.1744	29.5329	29.4856	27.9678	26.4797	23.2591	29.9806	19.5435
428	42.3974	42.8997	45.2014	42.1102	45.2318	31.4998	33.0801	31.7467	30.2799	30.0515	31.741	34.1486	38.0394	39.688	40.2721	37.7295	40.0187	43.6543	47.2763	41.7233	45.4153	46.6702	52.5253	43.1661	46.3478	40.0054	47.2249	17.672	19.3209	19.3892	15.2372	14.945	13.2702	13.4966	15.3573	14.8885	13.9677	14.5596	25.6779	23.2554	20.8639	27.0941	29.4341	29.2909	27.88	26.4157	23.1587	29.9332	19.3701
429	42.2657	42.7936	45.0672	41.98	45.1269	31.3791	32.9904	31.6269	30.1254	29.9957	31.6578	34.0659	37.8925	39.5548	40.139	37.701	39.9863	43.5795	47.1774	41.6533	45.2838	46.6419	52.3832	42.8884	46.1372	39.6963	46.9669	17.5445	19.3382	19.2163	15.0988	14.9114	13.1558	13.3737	15.292	14.8281	13.8588	14.4173	25.5813	23.1421	20.7251	27.0017	29.3285	29.1904	27.7847	26.4175	23.1207	29.9355	19.1521
430	41.9599	42.567	44.9003	41.8154	44.9472	31.1692	32.8059	31.4604	29.9097	29.7655	31.4704	33.9167	37.6447	39.3497	39.8939	37.591	39.7478	43.3662	46.9933	41.4677	45.0809	46.3775	52.1849	42.5063	45.9323	39.4451	46.6315	17.3201	19.2355	19.0017	14.9367	14.7688	12.9415	13.2256	15.1597	14.6509	13.6329	14.164	25.3081	22.9538	20.5289	26.7584	29.1335	28.984	27.6324	26.2977	22.94	29.7801	18.8825
431	41.7361	42.3098	44.6825	41.6648	44.8012	30.9117	32.5722	31.1825	29.6237	29.4719	31.205	33.7188	37.3741	39.049	39.6543	37.3825	39.458	43.1004	46.6804	41.2353	44.9027	46.1372	51.9517	42.255	45.641	39.1706	46.3686	17.1134	19.0109	18.7488	14.7853	14.6287	12.7609	13.0615	14.9704	14.3735	13.4261	13.9367	25.0102	22.7011	20.3094	26.4559	28.909	28.7614	27.3421	26.1238	22.6817	29.5888	18.624
432	41.4896	42.1305	44.4756	41.4416	44.533	30.6673	32.3398	30.9018	29.4131	29.2523	30.9493	33.4779	37.0804	38.7666	39.3394	37.1024	39.2213	42.9121	46.4028	41.0678	44.7012	45.9228	51.6596	41.9449	45.4028	38.8752	46.0881	16.9459	18.8138	18.5038	14.6298	14.4619	12.5968	12.8702	14.7997	14.1802	13.2418	13.729	24.7605	22.4415	20.0897	26.2044	28.735	28.6142	27.0871	26.0021	22.4967	29.46	18.3965
433	41.392	41.9819	44.3073	41.3256	44.3912	30.4972	32.1885	30.7434	29.2605	29.0912	30.7922	33.3413	36.9044	38.6008	39.1755	36.8968	39.102	42.8537	46.3022	40.955	44.6118	45.7693	51.4077	41.7221	45.2523	38.7074	45.9193	16.8277	18.7044	18.3751	14.5633	14.3261	12.4482	12.7286	14.6788	14.0605	13.1039	13.562	24.5834	22.2387	19.8869	26.0816	28.6742	28.5017	27.0031	25.9702	22.4057	29.4165	18.2717
434	41.3199	41.7993	44.1189	41.2768	44.2981	30.359	32.0499	30.5733	29.1412	28.963	30.6986	33.1731	36.7334	38.4436	39.0158	36.7116	38.9787	42.7697	46.2902	40.8725	44.5905	45.6985	51.1939	41.4634	44.9771	38.4862	45.6053	16.717	18.5963	18.2177	14.5127	14.1997	12.3134	12.6174	14.5605	13.9279	12.9522	13.4122	24.389	22.0487	19.7641	25.9291	28.5489	28.3766	26.9019	25.982	22.3015	29.3368	18.0319
435	41.2406	41.5971	43.9576	41.1908	44.1473	30.2025	31.8358	30.3939	29.0188	28.7769	30.5137	33.0131	36.6332	38.3059	38.847	36.5203	38.785	42.6716	46.1632	40.7569	44.5635	45.6627	51.011	41.2955	44.7389	38.3452	45.4306	16.6016	18.4918	18.0989	14.4389	14.0707	12.1665	12.4898	14.3985	13.7499	12.7917	13.2224	24.1722	21.8956	19.5957	25.8042	28.4386	28.2334	26.8221	25.9724	22.2349	29.2013	17.8518
436	41.0081	41.4171	43.7788	41.0974	43.9122	29.9114	31.5736	30.1715	28.7828	28.5596	30.2407	32.7893	36.4401	38.0892	38.6067	36.3436	38.5062	42.4647	45.8801	40.5055	44.355	45.4071	50.8293	41.0923	44.6	38.1891	45.3045	16.4344	18.3456	18.0086	14.2762	13.9053	11.9731	12.3359	14.2196	13.5235	12.638	13.0059	23.9323	21.685	19.3891	25.5658	28.148	28.0316	26.6498	25.8086	22.0312	28.9843	17.7062
437	40.7106	41.2088	43.5316	40.9179	43.752	29.6301	31.3263	29.9108	28.5262	28.3604	29.9874	32.5805	36.1178	37.8474	38.3629	36.0947	38.2089	42.2314	45.6696	40.2663	44.1515	45.1465	50.6331	40.8259	44.4065	38.0399	45.1076	16.2294	18.1418	17.8467	14.1361	13.7675	11.782	12.1789	14.0767	13.3336	12.4421	12.8032	23.6825	21.4605	19.1439	25.3154	27.9108	27.8368	26.4649	25.6606	21.8592	28.795	17.55
438	40.5872	40.9668	43.3888	40.7671	43.6143	29.4345	31.1317	29.7143	28.3571	28.1956	29.8782	32.4847	35.9633	37.7471	38.2558	35.9194	38.0475	42.115	45.6015	40.1625	44.0833	45.0489	50.4757	40.633	44.2635	37.8626	44.9672	16.1433	18.0357	17.7873	14.089	13.727	11.6742	12.0596	13.9673	13.2386	12.3002	12.6988	23.5263	21.2662	18.9627	25.2191	27.8734	27.7315	26.3473	25.5935	21.7867	28.648	17.4449
439	40.4515	40.7641	43.2246	40.6631	43.4177	29.2163	30.9089	29.5297	28.1676	28.0185	29.6794	32.2912	35.7592	37.5604	38.0405	35.7414	37.8247	41.9696	45.5145	40.0338	43.9699	44.9459	50.3342	40.4492	44.1188	37.6836	44.7906	16.0226	17.9471	17.7291	13.9932	13.5893	11.5476	11.9345	13.8098	13.1029	12.1736	12.5431	23.3364	21.0568	18.7499	25.0395	27.7503	27.6672	26.2523	25.5573	21.7328	28.5724	17.3546
440	40.3736	40.5957	43.0925	40.6177	43.3445	29.0687	30.7433	29.4051	27.9952	27.8798	29.5721	32.0737	35.6008	37.4867	37.918	35.6015	37.6272	41.8463	45.3915	39.8937	43.8396	44.8417	50.1663	40.2564	43.9451	37.4881	44.6913	15.918	17.8837	17.6863	13.9762	13.5009	11.4312	11.8317	13.7072	12.9562	12.0805	12.4145	23.2249	20.9488	18.5772	24.9046	27.6031	27.6074	26.1625	25.6602	21.6407	28.5527	17.2036
441	40.3622	40.5361	43.006	40.5815	43.322	29.0255	30.6219	29.3307	27.9303	27.785	29.5642	32.0125	35.5622	37.4413	37.8969	35.5341	37.5651	41.7724	45.2572	39.7356	43.7166	44.7169	50.0338	40.1399	43.8791	37.392	44.5663	15.8463	17.8424	17.6439	13.9228	13.4958	11.3465	11.7472	13.6709	12.8883	12.0233	12.3068	23.1527	20.8747	18.5276	24.8727	27.5068	27.4589	26.0836	25.6819	21.5858	28.4593	17.1049
442	40.2035	40.4221	42.8024	40.4612	43.1803	28.8448	30.4902	29.2205	27.8446	27.6424	29.4079	31.9213	35.4311	37.3235	37.7648	35.4158	37.4376	41.6642	45.0709	39.6375	43.6455	44.62	49.9173	40.021	43.7995	37.3682	44.4038	15.7566	17.7119	17.5443	13.7931	13.4211	11.2506	11.6748	13.5839	12.7925	11.892	12.201	22.9885	20.7471	18.3972	24.717	27.4332	27.3036	26.0097	25.6533	21.5016	28.3667	17.0086
443	40.051	40.2478	42.6399	40.2982	42.9979	28.664	30.3119	29.0905	27.7616	27.4537	29.2587	31.7545	35.3168	37.1808	37.5889	35.2926	37.3349	41.5338	44.963	39.5636	43.5981	44.5379	49.8258	39.9428	43.6884	37.3073	44.3358	15.6692	17.6121	17.4503	13.7507	13.3563	11.1591	11.613	13.4868	12.7132	11.7802	12.0819	22.8727	20.6105	18.2288	24.5968	27.3259	27.2179	25.8818	25.5811	21.3437	28.2828	16.8868
444	40.031	40.1735	42.5926	40.2524	42.9287	28.5298	30.1698	28.9926	27.6698	27.3288	29.1507	31.6158	35.2229	37.0551	37.4695	35.2336	37.2244	41.4446	44.8537	39.5271	43.5238	44.4488	49.7225	39.8767	43.5457	37.2032	44.3116	15.6086	17.574	17.3778	13.7309	13.297	11.0861	11.5284	13.4467	12.6185	11.7172	11.9872	22.7499	20.4789	18.1542	24.5452	27.2333	27.1637	25.7577	25.506	21.2984	28.1811	16.8171
445	40.0423	40.1919	42.612	40.3765	42.9981	28.5216	30.1974	29.0071	27.6396	27.3433	29.1665	31.6373	35.2529	37.0624	37.5558	35.2788	37.173	41.3854	44.7312	39.4683	43.4862	44.3898	49.6542	39.7643	43.5148	37.1066	44.2788	15.5617	17.5717	17.3742	13.7672	13.2964	11.0895	11.5124	13.4665	12.5823	11.7092	11.9616	22.7007	20.4589	18.1746	24.559	27.1375	27.1137	25.6871	25.4583	21.2951	28.1121	16.7359
446	40.077	40.2315	42.6501	40.4547	43.0933	28.5648	30.2355	29.0375	27.6571	27.3217	29.2375	31.7216	35.289	37.1199	37.6219	35.3024	37.1928	41.2927	44.6612	39.2945	43.3827	44.3674	49.5714	39.6415	43.3824	36.975	44.1542	15.5602	17.6035	17.4764	13.7978	13.3441	11.1169	11.5443	13.5199	12.5794	11.7184	11.8777	22.7116	20.4938	18.21	24.5008	27.1256	27.1548	25.6126	25.4701	21.2797	28.1221	16.6122
447	39.95	40.0739	42.5086	40.2565	42.9651	28.4023	30.0699	28.8689	27.492	27.1506	29.0949	31.5833	35.1657	36.9622	37.4674	35.1418	37.0507	41.1591	44.5117	39.1969	43.3381	44.2171	49.5449	39.548	43.315	36.9166	44.0334	15.4657	17.5492	17.5184	13.7247	13.2611	11.0221	11.4595	13.4443	12.466	11.6337	11.7867	22.5949	20.3887	18.0409	24.333	27.0368	26.9964	25.4599	25.3903	21.177	28.0064	16.5773
448	39.8329	39.8761	42.3259	40.1393	42.7763	28.2332	29.8638	28.676	27.3145	26.9734	28.9099	31.379	34.9505	36.766	37.2476	34.941	36.8479	41.0871	44.3577	39.173	43.256	44.0224	49.4315	39.4707	43.3297	36.9058	44.0085	15.3257	17.4353	17.5025	13.6318	13.1885	10.8915	11.3532	13.3202	12.3039	11.4997	11.7531	22.4105	20.1894	17.8793	24.2203	26.9266	26.8756	25.3484	25.3184	21.0525	27.919	16.5519
449	39.6267	39.6875	42.1318	39.9501	42.5328	28.0137	29.6631	28.4513	27.1031	26.7666	28.6823	31.2268	34.7504	36.5618	37.052	34.7369	36.6507	40.9479	44.2465	39.0511	43.1967	43.872	49.3552	39.3791	43.274	36.8347	43.9315	15.1965	17.3302	17.5225	13.5443	13.1566	10.769	11.2731	13.2188	12.1627	11.3926	11.6346	22.2766	20.0376	17.6898	24.0318	26.854	26.7665	25.2671	25.2845	21.0165	27.8773	16.4715
450	39.4902	39.5194	41.9596	39.8006	42.3883	27.856	29.5011	28.3122	26.9694	26.5986	28.5527	31.1421	34.6067	36.4491	36.8651	34.6128	36.5127	40.8422	44.0774	38.971	42.9877	43.7723	49.2255	39.2623	43.1886	36.6778	43.8483	15.0889	17.2294	17.5721	13.5128	13.1043	10.6959	11.1939	13.1722	12.0936	11.3272	11.5465	22.124	19.9447	17.6005	23.9375	26.767	26.6662	25.1757	25.2993	20.9279	27.791	16.3983
451	39.4207	39.3825	41.9507	39.7045	42.3333	27.7884	29.3934	28.2182	26.9034	26.5348	28.5353	31.1312	34.5289	36.3722	36.8282	34.5201	36.4199	40.7708	43.9751	38.9146	42.8287	43.6631	49.1488	39.2082	43.1489	36.5281	43.7539	15.0445	17.2196	17.6691	13.4835	13.0614	10.6811	11.1405	13.1756	12.097	11.3184	11.4857	22.0439	19.8817	17.5615	23.9128	26.7078	26.5935	25.1244	25.3252	20.8803	27.7206	16.416
452	39.4852	39.4939	41.9818	39.7551	42.4235	27.8568	29.3922	28.2473	26.9444	26.6051	28.6141	31.1992	34.6181	36.4165	36.9107	34.5188	36.4743	40.7343	43.9921	38.883	42.7624	43.6513	49.1611	39.2938	43.2851	36.5418	43.773	15.0731	17.2531	17.7312	13.5118	13.0599	10.7149	11.1913	13.2348	12.1065	11.3625	11.5107	22.0945	19.8987	17.5763	23.9887	26.7095	26.5639	25.1367	25.3573	20.8642	27.7828	16.5077
453	39.5879	39.6036	42.0319	39.7933	42.4864	27.886	29.4265	28.3224	26.9959	26.6264	28.6386	31.2994	34.7293	36.516	36.9829	34.6233	36.5252	40.6794	44.0383	38.8659	42.7725	43.7149	49.1168	39.3215	43.2675	36.5168	43.7617	15.1299	17.2846	17.7765	13.5745	13.0656	10.7786	11.2344	13.2975	12.1293	11.4173	11.5351	22.1139	19.9336	17.6041	23.996	26.7079	26.5703	25.1285	25.4244	20.8549	27.8461	16.5083
454	39.5577	39.5506	42.1	39.7275	42.5137	27.8522	29.4046	28.275	26.9911	26.5513	28.6004	31.2767	34.6997	36.5008	36.9837	34.6585	36.5094	40.5616	44.1152	38.9053	42.7762	43.749	48.9764	39.2732	43.0899	36.3659	43.5994	15.0912	17.297	17.8203	13.593	13.0704	10.8093	11.2228	13.3365	12.1155	11.4022	11.5258	22.0886	19.9068	17.6008	23.9208	26.6417	26.5297	25.1036	25.3658	20.8618	27.8575	16.4569
455	39.4226	39.3815	41.9923	39.6254	42.3727	27.7329	29.287	28.1425	26.8967	26.4625	28.4783	31.1938	34.5866	36.3674	36.8994	34.5601	36.416	40.548	44.0376	38.8177	42.7309	43.6413	48.9046	39.1662	42.9351	36.2358	43.472	14.983	17.2901	17.8245	13.5956	13.042	10.7786	11.1738	13.3272	12.0764	11.336	11.4448	21.9946	19.8331	17.5502	23.8646	26.5804	26.436	25.0554	25.2826	20.809	27.8245	16.3986
456	39.3761	39.262	41.8512	39.4941	42.2171	27.6257	29.1392	28.0086	26.7955	26.3332	28.3409	31.1247	34.4377	36.2492	36.7657	34.4295	36.3476	40.4628	43.8758	38.6311	42.5876	43.4561	48.8716	39.078	42.8185	36.1678	43.3545	14.9145	17.2532	17.8498	13.5783	13.0007	10.7358	11.1381	13.3296	12.0198	11.2466	11.3502	21.9083	19.7571	17.4876	23.8103	26.5091	26.3275	24.9682	25.2188	20.697	27.727	16.3471
457	39.2751	39.1195	41.7587	39.3755	42.0844	27.5332	28.9955	27.9044	26.6753	26.223	28.1901	31.0336	34.308	36.154	36.6329	34.3098	36.1866	40.3579	43.7391	38.5035	42.492	43.3337	48.8005	39.0165	42.7805	36.0628	43.2602	14.8611	17.1707	17.8827	13.5724	12.9578	10.7058	11.0718	13.325	11.9358	11.219	11.2822	21.8207	19.6411	17.4194	23.7071	26.4756	26.2969	24.8407	25.2257	20.6485	27.7628	16.3009
458	39.1422	39.0196	41.6397	39.2877	42.0182	27.4463	28.8433	27.7849	26.5547	26.1069	28.0614	30.9065	34.1804	36.0027	36.5579	34.2168	36.0365	40.2623	43.6399	38.4261	42.3707	43.2495	48.6943	38.9187	42.6587	35.8962	43.1344	14.824	17.1454	17.9206	13.589	12.9461	10.6683	11.0128	13.2933	11.8979	11.2103	11.2565	21.751	19.5346	17.3106	23.6356	26.4223	26.224	24.844	25.2691	20.6378	27.8198	16.2607
459	38.9495	38.9694	41.5212	39.2197	41.9282	27.3155	28.6924	27.6307	26.4295	25.9653	27.91	30.7501	33.979	35.8378	36.4282	34.1151	35.8552	40.1902	43.6144	38.3959	42.2769	43.1532	48.5621	38.694	42.4608	35.7783	42.9912	14.7458	17.0963	17.9627	13.5699	12.9034	10.6176	10.9301	13.2402	11.8549	11.1377	11.1618	21.6238	19.4176	17.1884	23.5605	26.3533	26.1218	24.7568	25.3082	20.6019	27.8494	16.2275
460	38.8935	38.8887	41.4215	39.1497	41.8281	27.206	28.5839	27.5065	26.3144	25.8951	27.8029	30.645	33.8388	35.7215	36.2497	34.04	35.7599	40.1463	43.556	38.342	42.2041	43.0868	48.4293	38.5391	42.3767	35.7235	42.881	14.7067	17.0881	18.0212	13.5492	12.9065	10.6067	10.916	13.2322	11.7983	11.0626	11.1023	21.5196	19.3133	17.129	23.5032	26.2992	26.007	24.6756	25.2615	20.5285	27.8031	16.1654
461	38.8601	38.8575	41.384	39.1447	41.7583	27.1285	28.5306	27.5069	26.2457	25.8529	27.7748	30.5806	33.7944	35.6882	36.1758	33.9781	35.7133	40.1159	43.5221	38.2978	42.1401	43.0405	48.3668	38.539	42.3647	35.6663	42.8946	14.6887	17.0806	18.0668	13.5353	12.8983	10.5889	10.9234	13.2259	11.7442	11.0408	11.0828	21.4606	19.2528	17.1005	23.4853	26.2642	26.0154	24.6203	25.3006	20.4764	27.7913	16.1507
462	38.7828	38.8276	41.2966	39.127	41.6532	27.0562	28.4848	27.4822	26.1999	25.7725	27.7362	30.5293	33.7009	35.641	36.1067	33.9635	35.7269	40.0764	43.3986	38.1965	42.0934	42.9924	48.3826	38.5451	42.2984	35.6076	42.8506	14.6628	17.0485	18.1058	13.5187	12.8904	10.5788	10.932	13.2247	11.7103	11.0676	11.0374	21.3903	19.2277	17.0433	23.4613	26.2402	25.9841	24.6185	25.3488	20.4448	27.7628	16.1444
463	38.6669	38.7447	41.209	39.0539	41.5544	26.9502	28.3573	27.4139	26.0943	25.6699	27.6311	30.4613	33.6207	35.5917	36.0445	33.8754	35.6502	40.0458	43.3607	38.156	42.1063	42.9223	48.3506	38.5239	42.246	35.5429	42.7961	14.6528	17.0094	18.1712	13.5248	12.8575	10.5842	10.9172	13.2319	11.6862	11.0641	11.0003	21.3265	19.1761	16.9825	23.4181	26.247	25.9761	24.645	25.4221	20.445	27.81	16.1878
464	38.5266	38.6071	41.1021	38.9398	41.437	26.8119	28.1989	27.2836	25.9578	25.5468	27.4853	30.3305	33.5105	35.4479	35.9167	33.7552	35.4832	40.0268	43.3399	38.0933	42.066	42.8636	48.3641	38.5131	42.2942	35.5209	42.8032	14.6263	16.9892	18.2308	13.4976	12.8195	10.5345	10.8721	13.2246	11.6207	11.0104	10.9616	21.3025	19.0537	16.9161	23.3613	26.2804	25.9596	24.6529	25.4415	20.4163	27.8153	16.2664
465	38.4476	38.5225	41.0143	38.8626	41.3979	26.7068	28.0922	27.1829	25.8328	25.453	27.3874	30.2047	33.3929	35.3414	35.8093	33.6685	35.3769	39.9423	43.2149	37.9956	41.9767	42.8299	48.3843	38.4813	42.3002	35.4409	42.8243	14.5864	16.9451	18.2661	13.4659	12.7926	10.4886	10.8117	13.1957	11.5339	10.9855	10.8924	21.2222	18.9472	16.8543	23.2897	26.2269	25.9035	24.6058	25.4367	20.3992	27.7566	16.2984
466	38.4172	38.4265	40.9357	38.7958	41.4073	26.6349	28.0602	27.0878	25.7451	25.4081	27.3114	30.1045	33.3127	35.2587	35.7493	33.5821	35.3424	39.8807	43.0224	37.8445	41.8634	42.7267	48.3074	38.3539	42.1848	35.3547	42.7762	14.5513	16.9242	18.2724	13.4517	12.7849	10.4847	10.7705	13.1855	11.5006	10.9599	10.8595	21.1694	18.8881	16.7952	23.2667	26.1959	25.8201	24.5048	25.466	20.3437	27.7289	16.2662
467	38.2656	38.3446	40.8267	38.7415	41.3363	26.5299	28.0178	26.9584	25.6804	25.3509	27.2024	29.9861	33.1972	35.1182	35.6581	33.4712	35.2166	39.7763	42.9367	37.7433	41.8227	42.6217	48.2231	38.2965	42.09	35.3051	42.736	14.5199	16.8986	18.2812	13.4091	12.7583	10.4498	10.7309	13.1326	11.4322	10.9413	10.7988	21.0703	18.7918	16.7075	23.203	26.1662	25.7376	24.4871	25.4436	20.2663	27.7625	16.2409
468	38.1064	38.179	40.635	38.6294	41.1778	26.3931	27.889	26.8154	25.5788	25.254	27.0646	29.829	33.0595	34.9655	35.5182	33.3559	35.0332	39.7402	42.9061	37.7858	41.8626	42.6065	48.2499	38.3739	42.1345	35.3051	42.7849	14.4795	16.8257	18.2943	13.3344	12.7079	10.4128	10.6883	13.0657	11.4019	10.8899	10.7168	20.9311	18.6933	16.6174	23.128	26.1694	25.716	24.4981	25.4107	20.2564	27.7876	16.2842
469	38.0704	38.1282	40.5742	38.5842	41.1524	26.3484	27.8285	26.792	25.5104	25.2432	27.052	29.7943	33.0085	34.9577	35.488	33.2863	34.9816	39.7604	42.8242	37.7861	41.8409	42.5999	48.3718	38.4947	42.2513	35.3782	42.9073	14.4479	16.8193	18.3583	13.2975	12.6925	10.4277	10.6701	13.06	11.3991	10.8319	10.6696	20.8466	18.649	16.5797	23.139	26.1668	25.6762	24.5061	25.3684	20.206	27.7781	16.3546
470	38.1014	38.204	40.6176	38.594	41.2226	26.3698	27.8573	26.8281	25.4728	25.2915	27.0489	29.835	33.0379	34.9984	35.5728	33.328	35.0432	39.728	42.7477	37.6898	41.8222	42.5513	48.4325	38.5014	42.2846	35.4677	42.9262	14.4402	16.8583	18.4237	13.2979	12.7251	10.4533	10.6714	13.0723	11.3981	10.8182	10.6393	20.8161	18.6291	16.5516	23.1457	26.1579	25.6596	24.4583	25.3863	20.1766	27.744	16.3958
471	38.1091	38.2888	40.6433	38.6536	41.2643	26.3684	27.8583	26.8071	25.4632	25.297	27.044	29.8631	33.0255	34.9862	35.6616	33.372	35.0605	39.7207	42.727	37.6217	41.8167	42.5407	48.3838	38.3946	42.189	35.4116	42.8103	14.4017	16.8736	18.4913	13.3119	12.7594	10.4626	10.6806	13.069	11.4047	10.8044	10.6085	20.7898	18.6069	16.552	23.1202	26.1393	25.6463	24.3851	25.4352	20.1656	27.7062	16.4135
472	38.1712	38.3278	40.5763	38.6869	41.2573	26.3479	27.7902	26.7593	25.4286	25.2614	27.0344	29.836	33.0165	34.9564	35.6642	33.4163	35.048	39.6927	42.6453	37.512	41.8144	42.517	48.274	38.2796	42.0717	35.3308	42.759	14.3791	16.8998	18.5532	13.3099	12.7475	10.4471	10.6873	13.0598	11.4001	10.773	10.5829	20.771	18.5935	16.5748	23.1231	26.0547	25.6062	24.3671	25.4168	20.1435	27.6817	16.4465
473	38.2015	38.3274	40.5352	38.6933	41.2918	26.2997	27.7415	26.7111	25.3864	25.2193	27.0255	29.8231	33.0094	34.9251	35.6352	33.4316	35.0513	39.6182	42.5305	37.3725	41.7328	42.4291	48.2811	38.2807	42.054	35.3113	42.8047	14.3563	16.8906	18.5999	13.3007	12.7134	10.438	10.6625	13.0765	11.3843	10.761	10.554	20.7412	18.5337	16.5294	23.1033	25.9796	25.5355	24.3271	25.3526	20.1252	27.6367	16.4905
474	38.1837	38.3355	40.5387	38.7044	41.3544	26.2624	27.7635	26.6555	25.3713	25.157	27.0291	29.8369	32.992	34.8986	35.6256	33.4326	35.0662	39.5457	42.441	37.2884	41.6396	42.3595	48.2989	38.3287	42.0631	35.3696	42.8394	14.3423	16.8858	18.6256	13.2848	12.7028	10.4284	10.6354	13.0857	11.3635	10.7579	10.5387	20.743	18.5119	16.5066	23.1068	25.9205	25.531	24.3075	25.3223	20.0691	27.597	16.5308
475	38.197	38.3429	40.5761	38.7404	41.393	26.2691	27.7821	26.6542	25.3735	25.1383	27.043	29.8361	33.0187	34.9086	35.6804	33.4292	35.0657	39.5319	42.3875	37.2741	41.6399	42.3476	48.282	38.3266	42.0137	35.3966	42.8888	14.338	16.8911	18.6529	13.2505	12.7192	10.4589	10.6503	13.0829	11.3661	10.7619	10.5345	20.7348	18.5344	16.5247	23.1279	25.9038	25.5464	24.3182	25.3393	20.014	27.553	16.5324
476	38.1931	38.3507	40.5946	38.7526	41.4086	26.2574	27.7905	26.6572	25.4275	25.1453	27.0835	29.8324	33.0819	34.9391	35.7488	33.5007	35.1011	39.4777	42.3037	37.2368	41.5799	42.2773	48.2848	38.2642	41.8769	35.3951	42.948	14.331	16.9018	18.7279	13.2477	12.7481	10.4709	10.6823	13.0792	11.3723	10.7464	10.5432	20.7393	18.5589	16.5555	23.1494	25.8559	25.5628	24.2934	25.3566	19.9489	27.5467	16.5351
477	38.1724	38.3448	40.5738	38.7646	41.4087	26.2517	27.7764	26.6694	25.4402	25.1591	27.094	29.848	33.1347	34.9456	35.7731	33.5304	35.1415	39.4492	42.2587	37.1722	41.5365	42.2282	48.188	38.2043	41.7705	35.2547	42.9684	14.3306	16.9213	18.7339	13.2402	12.7371	10.4818	10.7221	13.0873	11.3875	10.7375	10.5453	20.737	18.5796	16.5798	23.2027	25.8357	25.5708	24.2497	25.3356	19.9138	27.5566	16.5508
478	38.138	38.2964	40.5293	38.7343	41.3898	26.2192	27.7641	26.6397	25.4055	25.098	27.0246	29.815	33.0818	34.9298	35.712	33.5101	35.1413	39.3266	42.1466	37.0733	41.4549	42.1233	48.0229	38.122	41.6526	35.1198	42.8508	14.294	16.9125	18.6929	13.2144	12.7135	10.4899	10.7152	13.0735	11.391	10.7266	10.5392	20.7408	18.573	16.5652	23.2184	25.767	25.5163	24.2033	25.2567	19.8815	27.5266	16.5271
479	37.9704	38.0773	40.3475	38.5915	41.1844	26.0236	27.6082	26.4938	25.2554	24.938	26.8361	29.6272	32.8984	34.7749	35.4846	33.3074	34.9409	39.1417	41.9617	36.9456	41.3121	41.9792	47.7682	37.911	41.3968	34.9159	42.6465	14.1991	16.8268	18.6147	13.159	12.6558	10.4478	10.6469	12.9838	11.3125	10.6525	10.4847	20.6595	18.4501	16.4694	23.0805	25.6937	25.4176	24.1493	25.1892	19.784	27.4297	16.4139
480	37.6982	37.82	40.1113	38.3769	40.9206	25.7657	27.3371	26.2234	24.9826	24.7255	26.5842	29.3318	32.6137	34.5019	35.1814	32.9498	34.6017	39.0489	41.8319	36.8904	41.196	41.8001	47.4596	37.6893	41.1433	34.747	42.4824	14.0917	16.6878	18.565	13.0603	12.5696	10.3544	10.5236	12.8453	11.2112	10.5477	10.3916	20.4906	18.2759	16.2729	22.8995	25.5969	25.3755	24.0609	25.1616	19.6313	27.3381	16.3144
481	37.5181	37.7015	39.9295	38.2587	40.8186	25.639	27.1778	26.0864	24.8166	24.6055	26.4408	29.1469	32.4674	34.3262	34.9704	32.728	34.3899	38.9476	41.7151	36.8378	41.0714	41.6372	47.3328	37.5998	41.0246	34.7061	42.4407	14.0268	16.5917	18.561	12.9888	12.4995	10.278	10.4542	12.7651	11.1425	10.4788	10.3174	20.3856	18.1506	16.1662	22.7776	25.5324	25.3276	23.9769	25.1693	19.5202	27.2501	16.2402
482	37.475	37.664	39.856	38.2358	40.8862	25.6094	27.1547	26.0789	24.7776	24.5655	26.3946	29.1249	32.4216	34.3271	34.9492	32.6796	34.3392	38.8007	41.6015	36.7524	40.9712	41.5175	47.3081	37.5824	41.0019	34.7001	42.4685	14.027	16.5449	18.5707	12.9571	12.4714	10.2613	10.4329	12.7145	11.1114	10.4661	10.2812	20.3778	18.108	16.1621	22.7583	25.4505	25.3199	23.9083	25.1731	19.4194	27.1684	16.2287
483	37.3762	37.5647	39.7937	38.1646	40.8051	25.5387	27.1023	26.0473	24.694	24.5158	26.3575	29.1039	32.3596	34.3007	34.9255	32.5858	34.2972	38.7004	41.4712	36.623	40.8456	41.383	47.2139	37.5533	40.9366	34.6627	42.3711	14.0223	16.5113	18.5525	12.9246	12.4356	10.2468	10.4086	12.7025	11.0878	10.4471	10.2656	20.323	18.0546	16.1389	22.7294	25.3406	25.2511	23.8007	25.1357	19.3294	27.1029	16.202
484	37.2703	37.4704	39.7567	38.0722	40.6864	25.4557	27.008	25.9665	24.6581	24.4251	26.3016	29.0711	32.2903	34.2514	34.8131	32.4515	34.2401	38.5722	41.3296	36.5743	40.7683	41.3103	47.1027	37.4776	40.8996	34.6149	42.2919	13.9995	16.4821	18.5734	12.9075	12.4164	10.2153	10.4074	12.6728	11.0581	10.4387	10.2534	20.2591	17.9953	16.0931	22.7014	25.2809	25.1556	23.6997	25.0595	19.1963	27.0237	16.134
485	37.2461	37.4255	39.7547	38.1039	40.6619	25.4315	26.9533	25.9435	24.6651	24.4063	26.2966	29.0912	32.3163	34.2846	34.7796	32.4438	34.29	38.4726	41.2458	36.5377	40.753	41.2911	46.9821	37.4207	40.8334	34.5454	42.2192	13.9305	16.4662	18.6033	12.8772	12.4089	10.2007	10.4271	12.6767	11.0326	10.4258	10.2294	20.2182	17.9875	16.061	22.7093	25.2443	25.1364	23.6731	25.0248	19.1083	26.9902	16.0654
486	37.2394	37.3686	39.792	38.1503	40.6813	25.4228	26.9496	25.9625	24.6901	24.3988	26.2738	29.1265	32.3546	34.3212	34.8174	32.4526	34.3673	38.4736	41.2025	36.5071	40.7203	41.2396	46.9354	37.3955	40.788	34.4767	42.1411	13.9054	16.498	18.581	12.8638	12.3826	10.2204	10.4237	12.6847	11.0352	10.4188	10.2223	20.2557	18.028	16.0737	22.7076	25.2199	25.1645	23.6768	25.0571	19.0703	26.9815	16.0432
487	37.1226	37.2822	39.7209	38.0597	40.6299	25.3506	26.9277	25.9457	24.6707	24.3531	26.1736	29.0274	32.3074	34.2463	34.732	32.3955	34.3651	38.4313	41.1037	36.4022	40.5919	41.1087	46.959	37.3753	40.7645	34.4075	42.1096	13.8926	16.4708	18.5128	12.819	12.3351	10.2319	10.371	12.6499	11.0053	10.3795	10.2038	20.2453	18.0203	16.032	22.6877	25.1413	25.1153	23.6114	24.9955	19.021	26.941	16.069
488	37.0187	37.248	39.6144	37.9648	40.5824	25.26	26.8727	25.8801	24.6453	24.2891	26.0694	28.9343	32.233	34.1673	34.6179	32.3392	34.3124	38.3707	41.0391	36.3197	40.5473	41.0511	46.9498	37.2811	40.7411	34.3511	42.0529	13.8617	16.4296	18.4327	12.7942	12.3231	10.2124	10.341	12.6206	10.9596	10.3458	10.1711	20.1686	17.9935	15.9908	22.6607	25.1155	25.0632	23.5552	24.9381	18.9813	26.8666	16.0665
489	36.9712	37.198	39.4788	37.8589	40.4914	25.1315	26.7644	25.7487	24.5451	24.2148	25.9584	28.8201	32.1042	34.0488	34.4515	32.2728	34.1919	38.2109	40.9527	36.1979	40.5275	40.9626	46.7938	37.0911	40.7052	34.2326	41.86	13.8195	16.4001	18.3886	12.7732	12.2763	10.1768	10.3097	12.556	10.8847	10.2866	10.1399	20.0543	17.9595	15.9223	22.5615	25.0807	25.0272	23.4485	24.8808	18.9351	26.7295	16.0219
490	36.8788	37.0704	39.3769	37.7556	40.3884	25.0062	26.6413	25.6627	24.4324	24.1535	25.8449	28.7371	32.0185	33.9441	34.2873	32.1944	34.0488	38.0401	40.7944	36.0076	40.4006	40.8048	46.5202	36.7813	40.4967	34.006	41.5375	13.7434	16.3264	18.3575	12.7226	12.2355	10.1138	10.2822	12.4853	10.8198	10.2249	10.1026	19.9451	17.887	15.8545	22.4379	24.9864	24.923	23.3397	24.845	18.8269	26.6305	15.8978
491	36.6681	36.7876	39.1204	37.5643	40.2219	24.782	26.4213	25.4713	24.2807	24.0197	25.6298	28.5486	31.8278	33.7457	34.0637	31.9623	33.8636	37.8682	40.6279	35.8154	40.2177	40.6243	46.1744	36.4947	40.205	33.7246	41.2228	13.5958	16.1848	18.2737	12.6264	12.1348	10.0207	10.2085	12.371	10.7368	10.1565	10.0227	19.8015	17.7538	15.7158	22.2899	24.8392	24.8328	23.2021	24.7779	18.7261	26.5472	15.7587
492	36.4119	36.5369	38.8788	37.3207	40.025	24.534	26.1466	25.2167	24.0845	23.8298	25.3693	28.2506	31.5249	33.4703	33.8044	31.6669	33.5686	37.7575	40.5476	35.656	40.1445	40.5531	45.9845	36.3607	40.0356	33.5926	41.0611	13.4193	16.0447	18.1776	12.528	12.0124	9.908	10.0989	12.232	10.6328	10.0322	9.8972	19.6124	17.582	15.5186	22.09	24.7665	24.8005	23.1278	24.7797	18.6494	26.4514	15.6839
493	36.322	36.4964	38.835	37.2655	39.9921	24.4343	26.0222	25.0765	24.0133	23.7253	25.2698	28.0988	31.3872	33.3788	33.6818	31.5811	33.405	37.6739	40.5172	35.5351	40.1227	40.4888	45.9537	36.2679	40.0311	33.5517	41.0443	13.3139	16.0277	18.1617	12.4847	11.9753	9.8582	10.0655	12.1622	10.5511	9.9696	9.8386	19.5089	17.5167	15.4276	21.9818	24.6956	24.7505	23.0841	24.7194	18.5956	26.3875	15.6376
494	36.3591	36.5375	38.8749	37.385	40.1139	24.4907	26.0085	25.0865	24.0581	23.7675	25.2898	28.1468	31.4728	33.4603	33.7258	31.6595	33.4558	37.597	40.4724	35.4845	40.1184	40.4741	45.9044	36.1928	40.0089	33.4745	40.9932	13.2915	16.0724	18.1893	12.4963	12.009	9.8698	10.0627	12.2019	10.5422	10.0185	9.8446	19.4996	17.5413	15.4477	22.0501	24.6275	24.7345	23.0491	24.6574	18.5932	26.3852	15.5996
495	36.3491	36.5096	38.8806	37.4535	40.1343	24.479	25.9911	25.104	24.0486	23.796	25.3029	28.1837	31.5138	33.5078	33.734	31.7012	33.5039	37.4728	40.349	35.4108	40.0632	40.4295	45.7899	36.106	39.9038	33.3679	40.9211	13.2669	16.0718	18.1811	12.5022	12.0221	9.8675	10.0608	12.2276	10.5542	10.0249	9.843	19.51	17.5537	15.4571	22.0857	24.485	24.7113	22.9572	24.6099	18.5477	26.3405	15.5545
496	36.2461	36.4441	38.8412	37.4174	40.0443	24.4177	25.954	25.0791	24.0163	23.8187	25.2239	28.1497	31.4747	33.4681	33.6963	31.6789	33.4139	37.2931	40.1986	35.2558	39.9362	40.3198	45.6809	36.0008	39.8447	33.2755	40.797	13.2355	15.9996	18.0645	12.4837	12.0005	9.8506	10.0427	12.2158	10.5106	9.9837	9.8256	19.4679	17.5527	15.4327	22.0739	24.3682	24.6108	22.8873	24.5077	18.4864	26.3137	15.538
497	36.124	36.3591	38.7481	37.3205	39.9229	24.2929	25.8323	24.9849	23.9512	23.7593	25.0958	28.0655	31.3609	33.3705	33.6537	31.5605	33.2771	37.1602	40.0448	35.1344	39.8441	40.2199	45.6197	35.8811	39.8254	33.2254	40.6367	13.1659	15.9495	17.8862	12.4412	11.9414	9.8302	10.0125	12.1596	10.4587	9.9544	9.8052	19.3655	17.4783	15.3363	22.0033	24.2401	24.4933	22.8075	24.4256	18.4342	26.3	15.5274
498	36.0188	36.2947	38.6658	37.2994	39.8131	24.1821	25.7209	24.9002	23.8646	23.6826	25.0121	28.0278	31.2716	33.279	33.6232	31.4731	33.1145	37.0865	39.9217	35.0561	39.767	40.1195	45.5544	35.779	39.7722	33.142	40.5618	13.0833	15.9175	17.7218	12.4169	11.8823	9.807	9.976	12.1303	10.4284	9.9259	9.7727	19.2844	17.4138	15.2533	21.9335	24.1147	24.4073	22.6857	24.385	18.3401	26.2337	15.4703
499	35.9006	36.1634	38.5384	37.2095	39.7387	24.0606	25.5888	24.7948	23.7104	23.5262	24.8936	27.8937	31.1284	33.099	33.4481	31.3882	32.924	37.0651	39.8097	35.0222	39.651	40.0488	45.4052	35.6501	39.6567	32.9855	40.4627	12.9991	15.8353	17.5615	12.3257	11.8308	9.7353	9.9032	12.0994	10.3669	9.8779	9.721	19.1799	17.2833	15.1615	21.8247	24.0695	24.3614	22.6066	24.4073	18.2775	26.1519	15.4038
500	35.7567	36.033	38.3916	37.0783	39.5702	23.9095	25.4254	24.6508	23.6178	23.3911	24.7738	27.7325	31.004	32.9267	33.285	31.2899	32.7805	37.0613	39.7529	34.9519	39.5995	40.0139	45.2539	35.5315	39.5493	32.8627	40.3844	12.9072	15.701	17.419	12.2307	11.7742	9.6954	9.8469	12.0229	10.3111	9.8322	9.6667	19.0717	17.1595	15.0584	21.7429	24.0165	24.317	22.5457	24.3963	18.2644	26.0924	15.3682
501	35.6609	35.9053	38.2594	36.9313	39.3652	23.7946	25.2731	24.5126	23.4806	23.259	24.6864	27.6106	30.8656	32.8092	33.1629	31.1859	32.6532	37.0011	39.6318	34.8483	39.5024	39.8755	45.092	35.4107	39.4329	32.795	40.3296	12.8333	15.6002	17.2906	12.1632	11.7123	9.6134	9.8116	11.9388	10.2427	9.7811	9.5713	18.9604	17.048	14.965	21.6733	23.9752	24.2641	22.4669	24.3669	18.206	26.008	15.323
502	35.5722	35.8303	38.134	36.826	39.211	23.7127	25.1705	24.4173	23.3825	23.1765	24.592	27.5048	30.7863	32.7212	33.0769	31.0858	32.515	36.8969	39.5274	34.7496	39.4274	39.809	44.9342	35.2915	39.327	32.6985	40.226	12.7177	15.5366	17.1754	12.0809	11.6628	9.5435	9.7458	11.8672	10.1836	9.7221	9.5111	18.8785	16.9436	14.873	21.6154	23.8933	24.1878	22.4157	24.3177	18.1328	25.936	15.2537
503	35.4284	35.7148	38.0415	36.7428	39.1687	23.6078	25.0788	24.3427	23.2836	23.0842	24.4627	27.4134	30.7026	32.632	32.9596	30.9852	32.4017	36.7722	39.3582	34.6301	39.31	39.7445	44.885	35.2354	39.2264	32.5925	40.0795	12.6263	15.4552	17.0435	11.9846	11.6002	9.4605	9.6681	11.8034	10.1114	9.656	9.4721	18.7457	16.8485	14.7544	21.5191	23.7747	24.0785	22.3469	24.2388	18.0512	25.8381	15.1731
504	35.3017	35.634	37.9653	36.6878	39.0514	23.5283	24.9741	24.2359	23.17	22.9606	24.3461	27.3012	30.5874	32.5435	32.8099	30.8736	32.2768	36.6715	39.2583	34.4972	39.2218	39.6106	44.7723	35.1394	39.161	32.4332	39.936	12.544	15.397	16.922	11.9346	11.5209	9.3778	9.5959	11.7526	10.0188	9.6048	9.4251	18.61	16.7539	14.6235	21.4131	23.7087	23.9751	22.274	24.2086	17.9786	25.7557	15.0907
505	35.2032	35.5617	37.8598	36.6071	38.9384	23.4703	24.8431	24.1464	23.0765	22.8488	24.2832	27.2136	30.482	32.4206	32.6648	30.7613	32.22	36.5613	39.094	34.3601	39.0879	39.4518	44.6394	35.0506	39.0973	32.3595	39.818	12.4804	15.3651	16.8514	11.8784	11.4597	9.3062	9.5378	11.7123	9.9127	9.5423	9.3563	18.4861	16.6511	14.5377	21.3244	23.6009	23.8683	22.1655	24.1583	17.9063	25.6933	15.0326
506	35.2054	35.5026	37.834	36.5769	38.944	23.405	24.7905	24.1247	23.0276	22.7762	24.2412	27.1674	30.4304	32.3821	32.6249	30.7148	32.1876	36.537	39.0369	34.3481	38.9973	39.4	44.5035	34.9742	39.0393	32.285	39.7008	12.4372	15.3458	16.8204	11.8417	11.4165	9.2732	9.5084	11.7088	9.869	9.5024	9.3099	18.4106	16.5951	14.4825	21.2846	23.5653	23.8447	22.1396	24.149	17.8547	25.6064	15.0139
507	35.2402	35.4438	37.8416	36.575	38.931	23.4075	24.7636	24.0917	23.0037	22.7221	24.2462	27.1841	30.4503	32.4118	32.6144	30.7012	32.1998	36.4608	38.9401	34.3565	38.9962	39.3295	44.3429	34.8552	38.9734	32.1574	39.624	12.4365	15.3372	16.822	11.8193	11.4206	9.2332	9.4905	11.6958	9.8237	9.4762	9.2744	18.3913	16.5599	14.4668	21.2686	23.5679	23.7755	22.1262	24.116	17.8208	25.5268	14.987
508	35.2207	35.3672	37.8064	36.5677	38.8519	23.4323	24.7144	24.024	22.9495	22.6464	24.1931	27.1365	30.4231	32.3821	32.5651	30.6611	32.1867	36.3377	38.7912	34.3246	38.9237	39.1936	44.21	34.7664	38.9107	32.056	39.5242	12.4348	15.3183	16.7946	11.8089	11.4017	9.2184	9.4633	11.6843	9.7701	9.4543	9.2581	18.3865	16.5177	14.4319	21.2541	23.509	23.6729	22.0913	24.0633	17.7422	25.4471	14.9859
509	35.1563	35.2434	37.7154	36.4994	38.7597	23.289	24.5777	23.9267	22.828	22.4988	24.07	26.9749	30.2746	32.2528	32.4249	30.5013	32.0477	36.2492	38.7105	34.3028	38.8576	39.08	44.0881	34.6702	38.8426	32.0119	39.4748	12.3899	15.2564	16.6606	11.783	11.3243	9.1872	9.4038	11.6157	9.7011	9.3724	9.2096	18.3321	16.4346	14.342	21.1647	23.4594	23.5825	22.042	24.0443	17.7118	25.3957	14.9816
510	35.1519	35.1938	37.6818	36.4518	38.7292	23.2315	24.5074	23.8696	22.728	22.3811	24.0063	26.8542	30.1591	32.1839	32.3709	30.3688	31.9938	36.1454	38.6194	34.2736	38.7611	39.0226	43.9278	34.6436	38.809	31.9438	39.4574	12.3352	15.2471	16.5435	11.7436	11.2774	9.146	9.3502	11.5952	9.6541	9.3201	9.1804	18.2784	16.3764	14.2714	21.0584	23.3833	23.5536	21.9896	24.0216	17.662	25.3414	14.9527
511	35.1204	35.0942	37.6674	36.4355	38.6814	23.2067	24.4627	23.8266	22.6587	22.2718	23.9702	26.852	30.1149	32.1377	32.3696	30.3178	31.9727	36.0742	38.5487	34.2088	38.7096	38.98	43.7613	34.6133	38.6987	31.8404	39.4062	12.2802	15.2161	16.5043	11.7022	11.2463	9.0764	9.2881	11.5603	9.574	9.2738	9.1488	18.25	16.3103	14.2306	21.0007	23.3534	23.5157	21.9931	23.9904	17.6191	25.3192	14.9047
512	35.1016	35.0597	37.6267	36.4317	38.6709	23.2109	24.4595	23.8555	22.6153	22.2289	23.9936	26.9062	30.1259	32.1416	32.4051	30.3121	32.0363	36.0431	38.4865	34.1626	38.6324	38.9223	43.6957	34.6123	38.6125	31.808	39.3489	12.2594	15.1986	16.5263	11.6887	11.261	9.0618	9.286	11.5626	9.5665	9.2609	9.1512	18.2906	16.3022	14.2241	21.0094	23.3174	23.4802	21.9668	23.9893	17.5941	25.2686	14.8956
513	35.1072	35.0217	37.5881	36.4172	38.6302	23.173	24.4476	23.8236	22.5715	22.1744	23.9659	26.9194	30.1672	32.1577	32.4427	30.2915	32.0681	35.9484	38.4005	34.0949	38.5074	38.8307	43.4852	34.5194	38.4524	31.6864	39.1657	12.2383	15.1665	16.4701	11.6369	11.2371	9.0301	9.2628	11.5491	9.5411	9.2237	9.1309	18.2896	16.267	14.2231	21.0273	23.2669	23.4351	21.9041	24.0199	17.5599	25.2162	14.7842
514	35.0727	34.9891	37.5021	36.3718	38.5653	23.1513	24.4335	23.7804	22.4985	22.1225	23.8787	26.906	30.1731	32.1539	32.435	30.2291	31.9979	35.8607	38.2997	33.9945	38.3886	38.7405	43.365	34.4598	38.3692	31.6177	39.0108	12.2017	15.1326	16.3782	11.6263	11.1556	9.0155	9.2145	11.5215	9.5226	9.185	9.0851	18.2422	16.2007	14.1885	21.009	23.1863	23.3177	21.8398	23.9572	17.5219	25.1624	14.7358
515	34.982	34.9392	37.3976	36.2637	38.4534	23.0757	24.3292	23.7234	22.3892	22.0187	23.7351	26.8256	30.0566	32.0619	32.3112	30.0933	31.8455	35.7488	38.2002	33.9654	38.3389	38.664	43.3241	34.4506	38.306	31.5808	38.947	12.166	15.0605	16.2694	11.6031	11.0827	8.9896	9.1566	11.4915	9.4682	9.1231	9.0465	18.1276	16.1123	14.1285	20.9297	23.1473	23.2565	21.7991	23.8811	17.487	25.1959	14.75
516	34.9088	34.8546	37.2698	36.1554	38.3791	22.9753	24.2584	23.6155	22.3059	21.8865	23.6049	26.7655	30.0045	31.9791	32.2208	29.9504	31.7727	35.6575	38.1483	33.9753	38.2633	38.6261	43.2982	34.4402	38.2981	31.5808	38.9361	12.1305	14.9959	16.2034	11.5548	11.0464	8.9653	9.1212	11.4766	9.4254	9.0967	9.0167	18.0702	16.0341	14.0652	20.8466	23.1181	23.2267	21.8025	23.7905	17.4857	25.1919	14.8215
517	34.9171	34.809	37.2017	36.1398	38.3434	22.9349	24.2312	23.5583	22.2763	21.7992	23.5122	26.7347	29.9937	31.962	32.201	29.8736	31.756	35.5096	38.0003	33.9411	38.2134	38.5683	43.1988	34.3658	38.2456	31.5132	38.7854	12.1043	14.9696	16.1905	11.5164	11.0324	8.9256	9.1074	11.4766	9.4169	9.0783	9.0136	18.0734	15.9847	14.021	20.8396	23.0477	23.1349	21.77	23.7069	17.4271	25.1372	14.8345
518	34.8909	34.7884	37.1326	36.1186	38.2944	22.8881	24.1773	23.5174	22.2271	21.7339	23.4673	26.6836	29.9664	31.9183	32.1514	29.806	31.7353	35.3642	37.8627	33.8784	38.1321	38.4537	43.0407	34.2591	38.1269	31.3935	38.5711	12.0557	14.94	16.1771	11.487	11.0251	8.9169	9.1089	11.4425	9.4126	9.0473	9.0042	18.0474	15.9497	14.0004	20.8448	22.9086	22.989	21.6882	23.6116	17.3564	25.061	14.767
519	34.8002	34.7112	37.0304	36.0647	38.2278	22.7806	24.0628	23.4331	22.1281	21.6553	23.3899	26.6198	29.8855	31.8536	32.0439	29.7069	31.6403	35.2406	37.7173	33.7904	37.996	38.3573	42.8491	34.1509	37.9529	31.2572	38.3584	11.9864	14.8856	16.0965	11.42	10.9636	8.8844	9.0797	11.3632	9.405	9.0197	8.9506	18.0086	15.868	13.9771	20.8038	22.7857	22.8707	21.6045	23.4927	17.2473	24.9742	14.6752
520	34.7372	34.7184	36.9688	35.9877	38.1642	22.6867	24.0136	23.3751	22.0677	21.5877	23.3255	26.5653	29.8705	31.8586	32.0116	29.6588	31.5993	35.1339	37.5923	33.7236	37.8497	38.2911	42.6817	34.0995	37.8451	31.1802	38.2609	11.9585	14.8414	16.0031	11.3848	10.9177	8.8623	9.0522	11.292	9.4096	8.9838	8.8889	18.0038	15.8088	13.9547	20.7843	22.7115	22.8134	21.5261	23.4041	17.144	24.9795	14.6209
521	34.7379	34.7573	36.9633	35.995	38.0774	22.664	23.9894	23.3724	22.0585	21.5494	23.2895	26.5559	29.9326	31.9562	32.0247	29.6591	31.6424	35.0897	37.5379	33.6626	37.7722	38.2013	42.6196	34.0934	37.7857	31.1663	38.2106	11.9423	14.8254	15.9702	11.3752	10.8987	8.8701	9.0354	11.2931	9.4217	8.9793	8.8884	18.0029	15.8063	13.9637	20.7787	22.6396	22.745	21.467	23.3347	17.0899	24.989	14.6106
522	34.6508	34.741	36.8853	35.9444	37.9942	22.5857	23.8853	23.3396	22.041	21.5104	23.209	26.5363	29.9352	31.9538	31.9518	29.6363	31.6227	34.9639	37.4577	33.5497	37.6706	38.0827	42.5546	34.0478	37.8218	31.1563	38.1676	11.9121	14.8108	15.9237	11.3644	10.8867	8.8626	9.0222	11.2907	9.3994	8.9552	8.8705	17.9853	15.7848	13.9304	20.7351	22.5629	22.7183	21.4018	23.2654	17.0769	24.9716	14.6273
523	34.4911	34.6652	36.8073	35.8485	37.885	22.4772	23.8141	23.2813	21.9858	21.4414	23.1288	26.4829	29.8598	31.8947	31.8354	29.5896	31.6095	34.8804	37.4121	33.429	37.5717	38.0421	42.4736	33.9195	37.849	31.0697	38.048	11.8635	14.7918	15.8884	11.3475	10.8396	8.8424	9.006	11.2776	9.4225	8.9149	8.8288	17.9494	15.7521	13.8777	20.6931	22.53	22.7076	21.4181	23.2343	17.0654	24.9347	14.6432
524	34.3322	34.5459	36.7182	35.7098	37.7686	22.3471	23.7299	23.2077	21.9474	21.3503	23.0339	26.3805	29.7338	31.775	31.7529	29.4583	31.5074	34.7948	37.3632	33.374	37.4437	38.0192	42.3287	33.7696	37.7131	30.9081	37.8419	11.8101	14.7796	15.8962	11.3148	10.8052	8.8013	8.9746	11.2383	9.405	8.8832	8.7727	17.8893	15.6967	13.7905	20.6491	22.4747	22.6568	21.4126	23.2144	17.0447	24.8893	14.5931
525	34.2873	34.51	36.7058	35.6554	37.701	22.2832	23.7047	23.1525	21.9306	21.3224	22.9979	26.353	29.6538	31.7373	31.7299	29.4322	31.4727	34.7273	37.2729	33.3516	37.3697	37.9831	42.2416	33.6785	37.6072	30.8142	37.7051	11.7855	14.7713	15.887	11.3118	10.8016	8.796	8.9666	11.2176	9.4066	8.883	8.7561	17.8868	15.6759	13.7765	20.6445	22.427	22.6171	21.372	23.2194	17.0203	24.8564	14.5923
526	34.2413	34.4569	36.6407	35.6158	37.6553	22.2362	23.6833	23.1394	21.9268	21.3034	22.9571	26.3013	29.6333	31.6822	31.6887	29.4072	31.4749	34.671	37.2466	33.3308	37.2571	37.9109	42.1274	33.6103	37.4716	30.7607	37.545	11.7612	14.762	15.8466	11.2924	10.7619	8.8059	8.9716	11.185	9.3989	8.8861	8.7616	17.9002	15.6387	13.7718	20.6751	22.3718	22.5513	21.289	23.1855	16.9889	24.8077	14.566
527	34.1316	34.3709	36.5099	35.502	37.5696	22.1387	23.6111	23.0536	21.8153	21.2223	22.8496	26.1584	29.494	31.5835	31.5631	29.3139	31.3959	34.6111	37.1584	33.268	37.1532	37.8545	42.0671	33.5602	37.4619	30.7185	37.4706	11.7226	14.7283	15.7875	11.2334	10.6951	8.784	8.946	11.1571	9.3697	8.8456	8.7194	17.8366	15.5909	13.745	20.6367	22.3498	22.4985	21.1848	23.1345	16.9578	24.7671	14.5581
528	34.0074	34.2453	36.3245	35.3245	37.4629	22.0241	23.4983	22.9284	21.6903	21.1408	22.7229	26.0161	29.3232	31.4454	31.402	29.1497	31.2591	34.5489	37.0408	33.1583	37.0715	37.7684	42.0682	33.5197	37.4671	30.6384	37.3937	11.7228	14.7076	15.7199	11.1793	10.6395	8.762	8.9158	11.1139	9.3538	8.8165	8.6905	17.753	15.5325	13.7035	20.5573	22.3169	22.4489	21.1372	23.1002	16.9523	24.6936	14.5781
529	33.9838	34.1777	36.2456	35.3004	37.4666	21.9627	23.4704	22.8899	21.6193	21.1374	22.6352	25.993	29.2356	31.3822	31.3578	29.1485	31.2162	34.4847	36.9596	33.0457	36.9662	37.6601	42.0057	33.403	37.3495	30.4847	37.2667	11.7612	14.7258	15.6945	11.179	10.6248	8.7654	8.9144	11.0835	9.3708	8.8259	8.7142	17.7277	15.5164	13.7093	20.5643	22.2372	22.3872	21.065	23.0705	16.8842	24.6376	14.537
530	33.9638	34.1147	36.2117	35.3079	37.429	21.9042	23.4542	22.8556	21.5682	21.1041	22.6101	25.9927	29.1834	31.3379	31.3147	29.1537	31.2047	34.4731	36.9152	32.9261	36.8933	37.5719	41.9572	33.2351	37.1757	30.3408	37.0925	11.7595	14.6977	15.6965	11.163	10.6025	8.7667	8.9317	11.0607	9.3797	8.8403	8.6933	17.7063	15.5071	13.7174	20.5729	22.1744	22.3447	20.9997	23.0589	16.8434	24.6556	14.4974
531	33.9201	34.0079	36.0926	35.2538	37.3719	21.8397	23.3673	22.7775	21.4707	21.0749	22.5553	25.9126	29.0615	31.2581	31.2104	29.0546	31.1262	34.4137	36.8607	32.892	36.8561	37.5155	41.9291	33.0985	37.0772	30.2336	36.9895	11.7511	14.6748	15.7114	11.1253	10.5615	8.7594	8.9208	11.0626	9.3971	8.819	8.6752	17.672	15.4834	13.6795	20.5432	22.1138	22.3077	20.9646	23.0139	16.8556	24.6385	14.5023
532	33.831	33.9426	35.9889	35.2079	37.2614	21.7664	23.3007	22.6599	21.3837	21.025	22.4642	25.8154	28.9426	31.1987	31.0694	28.9762	31.0119	34.3933	36.7911	32.8642	36.8133	37.4966	41.8972	33.0198	36.9978	30.1406	36.9413	11.7339	14.6364	15.733	11.0734	10.506	8.7263	8.8818	11.0037	9.4012	8.7884	8.6657	17.6489	15.4205	13.6116	20.507	22.0851	22.3079	20.9605	23.0639	16.8518	24.6653	14.501
533	33.7727	33.9266	35.9356	35.1955	37.1881	21.7327	23.2956	22.6166	21.3109	20.9998	22.4226	25.8002	28.8491	31.1673	30.9774	28.9803	30.9454	34.2816	36.7398	32.7734	36.7704	37.3731	41.8511	32.9381	36.8906	30.0609	36.8999	11.7434	14.6282	15.7853	11.0524	10.5157	8.7465	8.9005	10.932	9.4048	8.7752	8.6824	17.6611	15.3992	13.6104	20.507	22.0258	22.2739	20.8928	23.0103	16.8437	24.668	14.4982
534	33.7179	33.8667	35.8834	35.1496	37.1283	21.7231	23.2687	22.6067	21.2432	20.956	22.4229	25.7641	28.801	31.1318	30.9001	28.984	30.9057	34.2058	36.7252	32.6979	36.7067	37.2864	41.8268	32.8669	36.8314	29.9895	36.8903	11.7544	14.6416	15.8256	11.0319	10.5285	8.7907	8.9592	10.9011	9.446	8.7818	8.708	17.6637	15.3897	13.6595	20.5212	22.01	22.246	20.8457	23.0366	16.8495	24.685	14.4869
535	33.6509	33.7636	35.832	35.0615	37.102	21.7007	23.205	22.5526	21.1563	20.8978	22.3776	25.6978	28.757	31.0221	30.8225	28.9417	30.8045	34.189	36.6919	32.6379	36.6365	37.1886	41.7123	32.7575	36.8143	29.893	36.8406	11.7609	14.6482	15.8097	11	10.5131	8.7929	8.971	10.892	9.452	8.7912	8.6886	17.6632	15.3848	13.6446	20.5093	21.9646	22.2629	20.7897	23.0669	16.8539	24.6344	14.4214
536	33.62	33.7004	35.8127	34.9979	37.0755	21.6747	23.1716	22.465	21.0883	20.8421	22.3405	25.6467	28.7404	30.9602	30.7881	28.9162	30.7675	34.1571	36.6447	32.5664	36.6077	37.1403	41.5955	32.6622	36.8098	29.8557	36.802	11.7728	14.6472	15.7396	10.9806	10.4999	8.8133	8.9697	10.8932	9.436	8.8021	8.6784	17.6339	15.4058	13.6238	20.4785	21.9122	22.2656	20.7222	23.0643	16.8728	24.5895	14.4074
537	33.6113	33.6779	35.7881	34.9787	37.053	21.6708	23.186	22.4619	21.0589	20.8491	22.3301	25.6638	28.7818	30.9656	30.7729	28.933	30.7762	34.0925	36.5537	32.5123	36.5546	37.0996	41.6019	32.6791	36.8149	29.8984	36.8487	11.8151	14.677	15.7539	10.9942	10.5197	8.8364	8.9784	10.9044	9.4591	8.8252	8.6781	17.6525	15.4176	13.6808	20.4644	21.872	22.2763	20.6659	23.0462	16.8638	24.5448	14.4456
538	33.5854	33.6686	35.8247	35.0449	37.0602	21.6583	23.1502	22.4586	21.0062	20.8442	22.3192	25.6899	28.8538	31.0212	30.7376	28.9707	30.7945	33.9816	36.5271	32.4996	36.5514	37.0872	41.6167	32.7201	36.8128	29.929	36.9024	11.851	14.7144	15.8546	10.971	10.5196	8.8368	9.0141	10.9081	9.4594	8.7993	8.6796	17.6771	15.4154	13.7613	20.4945	21.846	22.2968	20.6236	23.0151	16.8837	24.5542	14.4712
539	33.51	33.5886	35.7808	34.9711	37.0162	21.5947	23.0396	22.3713	20.9082	20.8037	22.216	25.6033	28.7833	30.9309	30.5983	28.9419	30.6629	33.9167	36.4754	32.5247	36.5335	37.0553	41.5623	32.7353	36.8085	29.9076	36.8947	11.8462	14.6941	15.8833	10.9269	10.5143	8.7961	9.0209	10.8942	9.4445	8.7604	8.6391	17.6379	15.3415	13.7452	20.488	21.8669	22.2913	20.5956	23.0011	16.8462	24.5786	14.4866
540	33.4348	33.5163	35.7076	34.9115	36.8876	21.5212	22.9372	22.2905	20.7955	20.7294	22.1467	25.4709	28.6937	30.8172	30.4455	28.8173	30.5276	33.7933	36.3373	32.4237	36.4755	36.9575	41.4929	32.7037	36.7654	29.8933	36.8245	11.8248	14.7027	15.8632	10.9164	10.5152	8.8252	8.9947	10.8684	9.4004	8.7578	8.5893	17.5501	15.2778	13.6813	20.4376	21.8404	22.2554	20.5417	22.9897	16.7917	24.5118	14.4857
541	33.3942	33.4256	35.6269	34.8759	36.823	21.4685	22.8358	22.1984	20.7202	20.6517	22.0834	25.3735	28.6027	30.7308	30.3414	28.735	30.4107	33.7034	36.2764	32.3243	36.4216	36.9116	41.3509	32.6165	36.6099	29.8306	36.7233	11.8146	14.6898	15.8538	10.9147	10.5125	8.8534	8.9912	10.8478	9.3723	8.7563	8.5736	17.4903	15.2788	13.6289	20.3643	21.8073	22.2339	20.4929	22.968	16.7507	24.4441	14.469
542	33.261	33.3199	35.5715	34.7526	36.7034	21.4183	22.7389	22.1377	20.6632	20.5942	21.972	25.3129	28.4959	30.6205	30.3037	28.6566	30.3506	33.6677	36.2357	32.22	36.3725	36.8789	41.2417	32.5788	36.5356	29.7664	36.6081	11.8024	14.698	15.89	10.9044	10.4979	8.839	9.0071	10.8479	9.3757	8.7464	8.5501	17.4239	15.2782	13.5621	20.2952	21.75	22.2099	20.4628	22.9223	16.6922	24.3628	14.4762
543	33.1968	33.3016	35.5104	34.6912	36.6391	21.3657	22.6658	22.1271	20.6094	20.5503	21.8978	25.3168	28.4555	30.5941	30.2717	28.5969	30.3431	33.619	36.108	32.1079	36.2681	36.7979	41.2152	32.6159	36.531	29.7285	36.5787	11.7983	14.7125	15.9173	10.9042	10.4858	8.8438	9.0072	10.8556	9.36	8.7588	8.5377	17.3948	15.2519	13.5466	20.3167	21.6948	22.1542	20.4446	22.9117	16.6447	24.3064	14.4845
544	33.2315	33.3281	35.5073	34.6911	36.6615	21.3841	22.6834	22.1033	20.5719	20.5717	21.8845	25.3311	28.4794	30.5626	30.2472	28.5736	30.3751	33.5686	36.0368	32.0146	36.1973	36.7065	41.1899	32.6333	36.5759	29.7129	36.6122	11.8038	14.7406	15.938	10.8627	10.4606	8.856	9.0199	10.8644	9.3623	8.7569	8.5459	17.4049	15.2063	13.5677	20.37	21.6963	22.1634	20.4078	22.9061	16.6562	24.3002	14.533
545	33.2579	33.4065	35.5605	34.764	36.7173	21.4642	22.7223	22.1126	20.5897	20.6489	21.9375	25.408	28.5771	30.5888	30.3221	28.606	30.4503	33.5593	36.0027	31.9677	36.1908	36.6997	41.1265	32.6205	36.552	29.6605	36.5735	11.85	14.7942	15.9993	10.8714	10.4668	8.8924	9.0746	10.9209	9.4098	8.7791	8.5751	17.4389	15.2338	13.5952	20.4464	21.7349	22.163	20.3858	22.9036	16.6973	24.3036	14.5397
546	33.2441	33.4452	35.5626	34.7953	36.7326	21.4808	22.7451	22.1448	20.6032	20.7069	21.97	25.4761	28.6107	30.6715	30.427	28.644	30.4933	33.519	35.9211	31.9158	36.1792	36.6748	41.1299	32.6179	36.5186	29.6252	36.5366	11.9304	14.8395	16.043	10.9204	10.5292	8.9497	9.1327	10.9804	9.4645	8.8209	8.6214	17.5144	15.2858	13.6417	20.545	21.7364	22.1077	20.3701	22.8464	16.7014	24.3065	14.569
547	33.1809	33.3882	35.4803	34.7359	36.6408	21.4299	22.6676	22.0599	20.5404	20.6603	21.893	25.4178	28.5434	30.606	30.3898	28.601	30.4274	33.4377	35.9134	31.8646	36.1892	36.5792	41.0471	32.5901	36.4113	29.554	36.448	11.9579	14.8484	16.039	10.9529	10.527	8.9697	9.1473	10.9726	9.4518	8.8498	8.615	17.4846	15.2581	13.5899	20.5348	21.7717	22.0764	20.3293	22.7828	16.6893	24.2861	14.5476
548	33.1186	33.3155	35.3402	34.6508	36.551	21.3417	22.5218	21.9592	20.4868	20.5839	21.8248	25.3334	28.4379	30.4912	30.2926	28.5437	30.3512	33.3512	35.8866	31.8097	36.143	36.4506	40.9811	32.5472	36.3704	29.5221	36.3472	11.9192	14.8878	16.0447	10.9238	10.5109	8.9526	9.1461	10.9401	9.4253	8.8708	8.5951	17.4292	15.2082	13.5294	20.4767	21.7317	22.0473	20.285	22.7453	16.6933	24.2551	14.5457
549	33.0841	33.2793	35.2593	34.5796	36.497	21.2669	22.4449	21.8896	20.4249	20.5247	21.7627	25.2992	28.3703	30.4455	30.2783	28.5169	30.3131	33.3174	35.8376	31.7778	36.0831	36.3896	40.9506	32.6003	36.4226	29.5346	36.3054	11.8676	14.8936	16.0757	10.8778	10.4812	8.9415	9.1387	10.9221	9.4098	8.8439	8.5705	17.3658	15.1625	13.4691	20.4413	21.719	22.0751	20.2542	22.7419	16.6685	24.2125	14.6025
550	33.0647	33.237	35.2473	34.5833	36.4176	21.2048	22.3913	21.8438	20.3687	20.4926	21.7416	25.2337	28.292	30.4064	30.2246	28.527	30.3353	33.2936	35.8201	31.7081	36.093	36.4082	40.9308	32.6135	36.4805	29.5627	36.2872	11.8638	14.899	16.1211	10.8427	10.4981	8.9362	9.1452	10.9192	9.4175	8.8318	8.5521	17.3053	15.1499	13.4302	20.4122	21.7352	22.074	20.3107	22.8128	16.6237	24.2104	14.6902
551	33.0254	33.2287	35.2705	34.5857	36.3913	21.1885	22.3516	21.832	20.2721	20.4591	21.7145	25.1773	28.259	30.3675	30.25	28.4929	30.3879	33.3188	35.8336	31.6971	36.1496	36.4061	40.8578	32.5696	36.5123	29.5346	36.2294	11.885	14.8921	16.1607	10.8069	10.5105	8.9372	9.1409	10.9172	9.4256	8.8215	8.5287	17.2735	15.1214	13.4302	20.4296	21.7545	22.0579	20.4063	22.864	16.5995	24.2045	14.7443
552	32.9862	33.228	35.3025	34.5622	36.3881	21.2147	22.3171	21.8251	20.2529	20.446	21.72	25.2228	28.2621	30.3607	30.3248	28.5092	30.4658	33.3907	35.8203	31.7061	36.1467	36.3787	40.7829	32.4912	36.5167	29.5378	36.1451	11.9254	14.885	16.182	10.7927	10.5187	8.9722	9.1573	10.9398	9.4449	8.8721	8.5408	17.3059	15.1386	13.4925	20.4451	21.7519	22.0146	20.4005	22.8302	16.6197	24.1861	14.7612
553	32.9571	33.2144	35.2616	34.5498	36.3696	21.1983	22.2958	21.8076	20.2449	20.439	21.6899	25.2254	28.2424	30.3552	30.3203	28.5509	30.4385	33.3831	35.738	31.6387	36.084	36.3176	40.7282	32.4206	36.53	29.5315	36.049	11.9547	14.9053	16.2145	10.8149	10.5171	9.0182	9.1782	10.9569	9.4468	8.9019	8.5563	17.2899	15.1488	13.4975	20.45	21.7541	21.9935	20.3212	22.7523	16.6474	24.1127	14.7773
554	32.8936	33.1213	35.1621	34.47	36.1823	21.1297	22.2048	21.6987	20.158	20.3135	21.5725	25.0848	28.1396	30.233	30.1823	28.4459	30.3114	33.3409	35.6609	31.6162	36.0114	36.2728	40.7174	32.4149	36.5515	29.5406	35.9701	11.942	14.8845	16.1957	10.8019	10.4812	9.0095	9.1853	10.9377	9.4198	8.8881	8.5184	17.224	15.1283	13.4277	20.4287	21.7457	21.9385	20.3034	22.7238	16.5984	24.0232	14.8195
555	32.7394	33.0067	35.0315	34.3285	36.0204	21.0349	22.0553	21.576	20.0491	20.1366	21.4722	24.9736	28.012	30.0692	30.0164	28.3404	30.1405	33.3693	35.5985	31.6603	35.9484	36.2014	40.6914	32.4698	36.538	29.5824	35.9451	11.9097	14.867	16.1723	10.7495	10.4436	8.9979	9.159	10.937	9.3679	8.8388	8.4524	17.1171	15.0405	13.3909	20.3684	21.7053	21.8533	20.3324	22.7081	16.5613	23.9786	14.8631
556	32.666	32.9051	34.9784	34.2531	36.0151	20.9874	21.981	21.5327	20.0066	20.1121	21.3949	24.9446	27.9169	29.9655	29.9489	28.2894	30.1018	33.3805	35.6233	31.7058	35.8891	36.1786	40.6135	32.4239	36.5009	29.6294	35.8954	11.8798	14.8981	16.2174	10.714	10.455	8.9887	9.1431	10.9649	9.3647	8.8233	8.4175	17.0685	15.0002	13.3645	20.3644	21.696	21.8005	20.3773	22.659	16.5398	23.99	14.8714
557	32.5936	32.8531	34.9494	34.2746	36.012	20.9938	21.9381	21.5266	19.9885	20.1204	21.3214	24.9158	27.8674	29.9078	29.9056	28.2686	30.1007	33.345	35.6656	31.7036	35.8439	36.1571	40.494	32.2829	36.3956	29.602	35.7955	11.8681	14.8755	16.2484	10.6788	10.4468	8.9866	9.1383	10.9545	9.3456	8.8372	8.4024	17.0327	14.9623	13.3222	20.3746	21.6834	21.8082	20.3886	22.6231	16.5559	24.0255	14.8434
558	32.5571	32.8474	34.9326	34.2498	35.9873	20.9571	21.9145	21.547	19.9317	20.1254	21.263	24.9083	27.8238	29.9161	29.8542	28.2729	30.1088	33.2858	35.6463	31.6226	35.8005	36.1359	40.4155	32.2109	36.3571	29.6014	35.7538	11.8769	14.8657	16.2511	10.6583	10.4381	9.0172	9.1583	10.9502	9.3252	8.8309	8.4282	17.0158	14.9677	13.3223	20.3943	21.6255	21.8212	20.3917	22.5698	16.5835	24.0154	14.8474
559	32.5261	32.7838	34.8811	34.1777	35.9682	20.9037	21.8512	21.4965	19.8923	20.0955	21.2577	24.8636	27.737	29.9225	29.8375	28.2283	30.0662	33.2378	35.5362	31.6358	35.6903	36.0423	40.3418	32.174	36.3787	29.6332	35.6957	11.8833	14.8569	16.2717	10.6404	10.4251	9.038	9.1829	10.9488	9.3397	8.8198	8.4325	16.9983	14.9714	13.3277	20.406	21.6211	21.76	20.3882	22.5283	16.5957	23.9954	14.908
560	32.4933	32.6608	34.8503	34.1323	35.9273	20.8262	21.7876	21.3993	19.8411	20.049	21.196	24.7966	27.6525	29.844	29.7853	28.1815	29.9498	33.207	35.4637	31.571	35.5738	35.9982	40.3246	32.16	36.3403	29.6589	35.655	11.8853	14.8216	16.3167	10.6403	10.4081	9.0482	9.1678	10.9708	9.3465	8.8299	8.4227	16.9687	14.9371	13.3229	20.3864	21.609	21.7059	20.3619	22.5275	16.5631	23.994	14.9618
561	32.4818	32.6021	34.852	34.1216	35.8947	20.8086	21.7684	21.3796	19.8077	19.996	21.1353	24.8021	27.6175	29.8142	29.729	28.1573	29.8483	33.1858	35.4548	31.4981	35.5179	35.9464	40.3109	32.1309	36.3458	29.6508	35.5948	11.9027	14.8147	16.3603	10.6461	10.4102	9.0789	9.1832	10.9798	9.3605	8.8243	8.4152	16.9839	14.9092	13.2873	20.363	21.5998	21.6909	20.3444	22.5114	16.5441	23.9831	14.9463
562	32.4445	32.5504	34.8386	34.0422	35.7963	20.7758	21.7571	21.306	19.741	19.9643	21.0485	24.7722	27.5056	29.7319	29.6177	28.1035	29.7471	33.1538	35.3945	31.4062	35.4703	35.8875	40.2008	32.0312	36.3498	29.5898	35.5603	11.9178	14.8257	16.394	10.641	10.4036	9.0827	9.1845	10.9796	9.3426	8.8022	8.4203	16.9507	14.875	13.2386	20.3349	21.6044	21.6653	20.3407	22.4766	16.5181	23.9839	14.928
563	32.4077	32.5127	34.8234	33.9864	35.7534	20.7148	21.7345	21.2647	19.7044	19.908	20.9874	24.7151	27.4089	29.6631	29.5618	28.0219	29.6857	33.1376	35.3442	31.3821	35.4407	35.903	40.1491	31.9277	36.3159	29.5332	35.5443	11.9289	14.8382	16.4408	10.6058	10.3741	9.0741	9.1919	10.9702	9.3193	8.788	8.401	16.8749	14.8351	13.2197	20.3106	21.6442	21.6635	20.3614	22.5266	16.537	24.0019	14.9607
564	32.4079	32.4721	34.8197	34.0165	35.7662	20.704	21.7138	21.2763	19.668	19.9021	20.9632	24.6792	27.4277	29.6414	29.5852	28.0398	29.685	33.1028	35.3392	31.3562	35.439	35.9699	40.1542	31.8502	36.3167	29.5518	35.534	11.9303	14.869	16.5636	10.5955	10.3858	9.1084	9.2213	10.963	9.3058	8.7993	8.3861	16.858	14.8294	13.2425	20.3311	21.6823	21.6425	20.3658	22.5288	16.5467	24.0314	15.0026
565	32.4439	32.4763	34.8537	34.0633	35.8351	20.7164	21.7352	21.295	19.6646	19.9263	20.9975	24.6831	27.4723	29.6639	29.6126	28.1177	29.7571	33.1064	35.3489	31.2991	35.4756	35.9737	40.1923	31.8306	36.3661	29.5757	35.527	11.947	14.9011	16.7123	10.6098	10.4459	9.1503	9.271	10.9916	9.3223	8.8539	8.3829	16.9031	14.8624	13.2764	20.4092	21.6985	21.6349	20.3847	22.4879	16.5633	24.0361	15.0457
566	32.4544	32.4767	34.8843	34.0785	35.8797	20.7502	21.7789	21.3063	19.6946	19.9386	20.9963	24.7324	27.4822	29.7034	29.6297	28.1442	29.8205	33.1022	35.3225	31.2087	35.4623	35.9668	40.2364	31.8329	36.3947	29.6079	35.5168	11.9501	14.9146	16.8094	10.5995	10.4575	9.163	9.3132	11.0495	9.3484	8.8878	8.407	16.9107	14.8765	13.3075	20.4718	21.7144	21.5912	20.4012	22.4781	16.5759	24.0802	15.0783
567	32.4217	32.4381	34.8359	34.0964	35.8972	20.7194	21.7743	21.3065	19.7035	19.9428	20.9422	24.7485	27.4289	29.7198	29.6232	28.1427	29.8443	33.0379	35.2448	31.1226	35.3711	35.9138	40.1693	31.8153	36.3727	29.5976	35.4883	11.9204	14.9051	16.815	10.5832	10.4274	9.1685	9.3362	11.0844	9.3654	8.9018	8.4189	16.9244	14.8909	13.324	20.5037	21.6666	21.5788	20.3821	22.5085	16.5807	24.0655	15.1035
568	32.4064	32.4479	34.7865	34.0516	35.9313	20.6822	21.7526	21.2586	19.6814	19.9306	20.909	24.7329	27.3746	29.698	29.6318	28.1109	29.8677	32.9417	35.1977	31.0748	35.296	35.8264	40.1236	31.7916	36.3114	29.5946	35.4818	11.9152	14.9059	16.8055	10.621	10.4249	9.2325	9.3458	11.122	9.3766	8.9125	8.4517	16.9302	14.8998	13.311	20.5347	21.6701	21.5897	20.3571	22.5158	16.5731	24.0788	15.1434
569	32.4547	32.5274	34.837	34.0509	35.9226	20.6887	21.767	21.2348	19.643	19.9594	20.9139	24.7243	27.3802	29.7129	29.6626	28.0917	29.8798	32.8921	35.2052	31.043	35.3019	35.8019	40.0117	31.7428	36.1528	29.5271	35.4107	11.9699	14.9674	16.8614	10.6781	10.4411	9.2911	9.3758	11.1865	9.3988	8.9337	8.492	16.9133	14.8975	13.3066	20.5875	21.6894	21.573	20.3864	22.5546	16.5522	24.0991	15.1357
570	32.4864	32.4844	34.8717	34.0504	35.9047	20.7096	21.7498	21.2457	19.6309	19.9559	20.9011	24.7113	27.4292	29.7408	29.6084	28.0732	29.8615	32.802	35.1794	30.9545	35.2616	35.7041	39.9153	31.7042	36.0442	29.4456	35.3599	11.9944	14.9615	16.9585	10.6972	10.4506	9.3114	9.4242	11.2374	9.4258	8.9642	8.5056	16.9101	14.8871	13.3084	20.6411	21.6865	21.4641	20.41	22.5491	16.5467	24.0741	15.1574
571	32.4591	32.4293	34.8283	34.0128	35.8988	20.7201	21.7108	21.219	19.6173	19.971	20.8976	24.7376	27.4513	29.7874	29.5632	28.0692	29.8372	32.784	35.149	30.8776	35.2282	35.7032	39.9268	31.7218	36.0626	29.4316	35.3052	12.0036	14.9716	17.0264	10.7047	10.4551	9.3593	9.4563	11.2746	9.4332	8.9939	8.5204	16.9231	14.916	13.3465	20.7009	21.658	21.448	20.4125	22.5464	16.5605	24.0464	15.2133
572	32.3431	32.3823	34.7089	33.9217	35.8172	20.6801	21.6366	21.1452	19.5803	19.9001	20.8747	24.6736	27.3967	29.7367	29.5021	28.0219	29.8027	32.8173	35.0408	30.7618	35.1674	35.6186	39.907	31.7134	36.0345	29.4328	35.2561	11.9823	14.9298	17.0701	10.6717	10.4479	9.3971	9.4712	11.2642	9.4247	8.9926	8.5134	16.8911	14.8992	13.3666	20.7137	21.5915	21.4467	20.3609	22.4913	16.5688	23.9991	15.2603
573	32.1726	32.2606	34.543	33.7802	35.6986	20.5773	21.5332	21.0455	19.4844	19.8064	20.8086	24.5527	27.3142	29.6532	29.408	27.9769	29.714	32.7909	34.9285	30.696	35.1457	35.6287	39.9393	31.775	36.019	29.5334	35.2777	11.93	14.8601	16.9944	10.6173	10.4191	9.4107	9.4356	11.2149	9.3856	8.974	8.4845	16.8437	14.84	13.3457	20.6736	21.5585	21.4398	20.3429	22.4373	16.5573	23.9608	15.3355
574	32.0559	32.1622	34.4582	33.6689	35.594	20.4972	21.4423	20.9745	19.4036	19.7342	20.7564	24.4882	27.233	29.5943	29.3179	27.9337	29.6233	32.7691	34.8879	30.6676	35.141	35.6243	40.0208	31.8044	36.0147	29.6057	35.3155	11.8899	14.8092	16.9177	10.5924	10.4074	9.4077	9.4175	11.2044	9.3523	8.9599	8.4711	16.7933	14.8148	13.3106	20.6242	21.5849	21.4268	20.318	22.4418	16.5504	23.9873	15.3906
575	32.0958	32.1844	34.4469	33.6931	35.5963	20.4989	21.4418	20.9965	19.3944	19.8252	20.7745	24.5126	27.3118	29.5939	29.3799	27.9917	29.6502	32.7575	34.779	30.6107	35.1041	35.6454	40.0025	31.7488	35.9515	29.5934	35.3496	11.874	14.8259	16.902	10.6442	10.454	9.4473	9.4541	11.2802	9.3694	8.9913	8.5095	16.847	14.8797	13.3255	20.6825	21.5765	21.4179	20.3176	22.4417	16.5258	23.9764	15.4257
576	32.1675	32.2689	34.4979	33.8154	35.6808	20.5792	21.4891	21.0393	19.4324	19.9251	20.8264	24.609	27.3594	29.6429	29.4838	28.0914	29.737	32.736	34.691	30.4886	35.0598	35.618	39.882	31.7052	35.8149	29.5109	35.2922	11.8959	14.88	16.9988	10.7179	10.4795	9.5123	9.5079	11.3554	9.4019	9.0534	8.5723	16.9469	14.9632	13.37	20.8035	21.5587	21.4266	20.3266	22.5003	16.5211	23.9822	15.4268
577	32.0597	32.2128	34.4359	33.7438	35.6188	20.5463	21.4383	20.9785	19.3544	19.9276	20.7629	24.5811	27.3054	29.5522	29.4022	28.015	29.7009	32.6749	34.518	30.3975	35.0025	35.5467	39.771	31.6899	35.7481	29.4178	35.2101	11.8996	14.8746	17.04	10.7135	10.4736	9.5384	9.5165	11.3712	9.4035	9.0529	8.576	16.9379	14.9265	13.341	20.8472	21.5254	21.4437	20.3221	22.5372	16.5262	23.9559	15.4503
578	31.863	32.1191	34.379	33.6299	35.5193	20.4885	21.3251	20.8876	19.3024	19.9065	20.6922	24.5031	27.2098	29.4134	29.2952	27.9244	29.6088	32.6754	34.4354	30.3413	34.9846	35.5072	39.738	31.7347	35.7233	29.3682	35.1548	11.9264	14.8548	17.0497	10.7311	10.492	9.5322	9.5177	11.4008	9.3816	9.0559	8.5998	16.9057	14.8863	13.3356	20.8389	21.5179	21.477	20.3683	22.568	16.5345	23.926	15.4886
579	31.8435	32.1605	34.3758	33.5955	35.532	20.5324	21.2854	20.8844	19.3374	19.9187	20.6746	24.4479	27.2699	29.4061	29.2865	27.9269	29.573	32.6595	34.3837	30.3677	34.9638	35.4857	39.7092	31.7655	35.6631	29.3481	35.0754	11.9559	14.9096	17.1378	10.7893	10.5361	9.5649	9.5641	11.4501	9.3974	9.0847	8.6254	16.8932	14.9167	13.3622	20.8514	21.5471	21.49	20.3741	22.6132	16.5496	23.9131	15.4954
580	31.8711	32.2053	34.3568	33.5634	35.5407	20.556	21.2372	20.8728	19.3335	19.8958	20.6517	24.3994	27.2433	29.3907	29.2523	27.8934	29.5341	32.541	34.2386	30.3619	34.8255	35.4387	39.6175	31.7354	35.5592	29.2816	35.0023	11.9715	14.9033	17.2465	10.797	10.5292	9.5707	9.5953	11.4815	9.3941	9.1148	8.6099	16.8691	14.9155	13.3781	20.873	21.5377	21.5096	20.3779	22.6271	16.5156	23.9043	15.4549
581	31.8946	32.185	34.3983	33.5838	35.5569	20.5478	21.2124	20.892	19.328	19.9119	20.6465	24.3899	27.2526	29.4111	29.287	27.885	29.535	32.4669	34.1483	30.2695	34.71	35.4093	39.5057	31.6398	35.468	29.1987	34.937	12.0142	14.8992	17.3818	10.7855	10.5612	9.6391	9.6408	11.5431	9.4158	9.1388	8.6231	16.9129	14.9523	13.4145	20.9141	21.4788	21.4469	20.3644	22.6301	16.4603	23.8921	15.4304
582	31.8759	32.1251	34.4069	33.5194	35.5342	20.5042	21.2166	20.8346	19.2945	19.9153	20.6127	24.3699	27.2196	29.4305	29.2974	27.8761	29.5316	32.4398	34.1057	30.2224	34.6961	35.3562	39.3989	31.508	35.3636	29.1087	34.8352	12.0014	14.8918	17.4601	10.7849	10.5634	9.6885	9.6666	11.6079	9.4204	9.141	8.6389	16.9337	14.9633	13.4248	20.8995	21.4172	21.3768	20.3698	22.6097	16.4469	23.853	15.4445
583	31.8425	32.0478	34.3823	33.4254	35.4971	20.4491	21.1947	20.7664	19.2437	19.8938	20.5871	24.3653	27.1279	29.3793	29.2998	27.8598	29.4978	32.3477	34.0527	30.2445	34.6907	35.2874	39.32	31.3954	35.267	29.0771	34.7924	11.9685	14.8654	17.4989	10.8213	10.5784	9.6604	9.659	11.6362	9.4084	9.1393	8.6526	16.9051	14.9386	13.3963	20.8649	21.3946	21.3889	20.3821	22.6397	16.497	23.8573	15.4615
584	31.8006	32.0015	34.3434	33.3718	35.4456	20.429	21.1596	20.7684	19.2197	19.9173	20.569	24.3822	27.0762	29.3726	29.2734	27.7689	29.4736	32.341	34.0188	30.2486	34.6446	35.1683	39.3209	31.3585	35.2461	29.0713	34.8238	11.9484	14.8426	17.5243	10.8621	10.6215	9.6663	9.6543	11.6795	9.4357	9.153	8.6435	16.9302	14.9247	13.3968	20.8357	21.3404	21.4002	20.3885	22.6996	16.5293	23.8657	15.4808
585	31.7597	31.9624	34.2747	33.3295	35.3942	20.431	21.1478	20.7569	19.1881	19.9296	20.5672	24.3793	27.0395	29.3566	29.2411	27.7053	29.4663	32.3469	34.0293	30.2543	34.6355	35.1052	39.4014	31.4129	35.2642	29.105	34.8254	11.9526	14.8532	17.6004	10.8691	10.6558	9.7429	9.6858	11.6932	9.4623	9.1828	8.6914	16.9348	14.9531	13.4373	20.8752	21.3313	21.4602	20.375	22.7298	16.5356	23.897	15.5202
586	31.7146	31.9293	34.2768	33.3083	35.3395	20.3829	21.1138	20.6975	19.1555	19.9343	20.5382	24.3196	27.0003	29.3388	29.208	27.661	29.4694	32.2847	33.9889	30.2904	34.6107	35.0865	39.4532	31.481	35.2475	29.115	34.8204	11.99	14.8389	17.6355	10.879	10.6508	9.7557	9.7087	11.7014	9.4715	9.1856	8.7055	16.8952	14.9403	13.4399	20.8769	21.3638	21.522	20.3639	22.7695	16.556	23.8907	15.6028
587	31.6586	31.8767	34.2778	33.2827	35.2824	20.3283	21.0532	20.6488	19.1499	19.9211	20.4784	24.2132	26.9769	29.3097	29.1992	27.61	29.4265	32.212	33.9184	30.2629	34.5334	35.0369	39.3732	31.4066	35.1271	29.0796	34.7467	11.999	14.8427	17.6125	10.8706	10.6341	9.7128	9.7349	11.7135	9.4652	9.1783	8.6909	16.8301	14.9206	13.4275	20.8783	21.334	21.5134	20.2932	22.7228	16.5224	23.8405	15.607
588	31.6024	31.7763	34.2104	33.2066	35.2637	20.2794	21.0052	20.6071	19.1087	19.8739	20.4445	24.1645	26.9414	29.2548	29.1448	27.5547	29.3522	32.1143	33.8464	30.2499	34.4531	34.9313	39.2905	31.343	35.0498	29.0152	34.6875	12.0198	14.8018	17.5854	10.8728	10.6253	9.7038	9.7489	11.7285	9.464	9.1745	8.6948	16.77	14.8677	13.3623	20.8574	21.235	21.514	20.3151	22.6502	16.4461	23.7873	15.565
589	31.5447	31.7424	34.1687	33.181	35.2402	20.2342	20.9794	20.5771	19.0962	19.8585	20.4603	24.1387	26.9535	29.2748	29.1034	27.5069	29.3243	32.0297	33.8066	30.1985	34.3789	34.9461	39.3124	31.2991	35.0891	28.9731	34.6356	12.019	14.7647	17.5863	10.8631	10.6288	9.7244	9.7404	11.7464	9.487	9.1865	8.7256	16.767	14.8531	13.3186	20.8728	21.2103	21.5127	20.3587	22.6208	16.4024	23.7511	15.5641
590	31.5396	31.743	34.1849	33.1819	35.2306	20.2391	20.9922	20.6022	19.0866	19.8634	20.4486	24.1746	26.9871	29.3104	29.148	27.4978	29.3778	31.9522	33.8171	30.0974	34.3109	34.9501	39.3207	31.2721	35.0275	28.9391	34.5788	12.0155	14.7888	17.5868	10.8634	10.6745	9.7424	9.7444	11.8216	9.5255	9.2059	8.7648	16.8346	14.8636	13.3735	20.9258	21.2144	21.4853	20.3716	22.6534	16.3815	23.6703	15.5611
591	31.4921	31.736	34.1463	33.1779	35.1956	20.2246	20.9621	20.5799	19.0371	19.8806	20.4581	24.144	26.9814	29.3119	29.1888	27.503	29.3889	31.8883	33.7962	30.0413	34.2375	34.8911	39.3237	31.2583	34.9642	28.8831	34.6058	12.0528	14.82	17.5832	10.869	10.7146	9.7796	9.7571	11.8836	9.5713	9.2318	8.7851	16.8515	14.8567	13.4315	20.9442	21.1576	21.4761	20.2745	22.5969	16.3632	23.6227	15.6062
592	31.4231	31.6044	33.996	33.1041	35.1458	20.1204	20.8897	20.4573	18.9778	19.848	20.3983	24.0293	26.905	29.2335	29.109	27.4884	29.277	31.8942	33.8152	30.0059	34.1288	34.7647	39.3285	31.333	35.0428	28.885	34.6657	12.0256	14.7877	17.5501	10.8311	10.6855	9.7724	9.7433	11.8817	9.5434	9.2024	8.7668	16.8143	14.7908	13.4085	20.8899	21.111	21.462	20.2256	22.5153	16.3798	23.6226	15.6541
593	31.3578	31.4591	33.8652	33.0752	35.1318	20.1377	20.8703	20.4277	18.9374	19.797	20.345	24.0509	26.8588	29.208	29.0673	27.4986	29.2382	31.981	33.878	30.0461	34.1298	34.7971	39.4711	31.4449	35.134	28.9592	34.7785	12.0355	14.7351	17.5761	10.8153	10.6787	9.8084	9.7381	11.8825	9.5548	9.2013	8.7444	16.7976	14.7752	13.4243	20.8457	21.1669	21.4435	20.2509	22.5283	16.4335	23.6404	15.712
594	31.3721	31.4238	33.917	33.1196	35.1996	20.1536	20.9039	20.5159	18.946	19.8183	20.3771	24.0933	26.909	29.2245	29.083	27.5823	29.2894	31.9729	33.8377	30.0223	34.1248	34.9091	39.5739	31.4643	35.186	28.9833	34.8326	12.095	14.7406	17.6331	10.8572	10.6964	9.8524	9.7779	11.8925	9.5833	9.2482	8.804	16.8136	14.8164	13.4342	20.8709	21.1938	21.4789	20.334	22.4706	16.4827	23.6567	15.782
595	31.3593	31.4294	33.9965	33.1151	35.1791	20.1456	20.8807	20.5736	18.9379	19.8077	20.4069	24.0427	26.9799	29.2858	29.0731	27.6204	29.3552	31.9375	33.8625	29.9486	34.105	34.9762	39.5571	31.487	35.1816	28.9553	34.7992	12.1711	14.7648	17.6459	10.8701	10.7309	9.8716	9.8094	11.9565	9.6163	9.2426	8.8598	16.847	14.8555	13.446	20.9356	21.2061	21.5145	20.3877	22.4437	16.4758	23.6158	15.8125
596	31.3345	31.4337	33.9972	33.0774	35.1235	20.1428	20.8423	20.562	18.9308	19.7524	20.3483	23.9956	26.9969	29.3251	28.9803	27.6131	29.3993	31.8425	33.8185	29.8812	34.084	34.8082	39.4774	31.485	35.1792	28.8753	34.756	12.1912	14.7853	17.6128	10.859	10.756	9.895	9.8211	12.0014	9.6408	9.2461	8.8592	16.8646	14.8668	13.4419	20.9408	21.1898	21.4582	20.3494	22.4425	16.4513	23.5295	15.7835
597	31.321	31.4061	33.9539	33.0433	34.9987	20.1414	20.8223	20.5368	18.9099	19.7534	20.2986	23.9834	26.9365	29.2771	28.9243	27.5891	29.3922	31.7775	33.6762	29.7851	34.0103	34.6206	39.2846	31.3112	35.1074	28.7694	34.5863	12.2043	14.778	17.5996	10.8576	10.771	9.918	9.8279	12.0064	9.656	9.2569	8.8549	16.8558	14.825	13.4052	20.9394	21.105	21.366	20.2598	22.4148	16.4108	23.4104	15.7469
598	31.2922	31.3684	33.8728	33.013	34.8917	20.0916	20.7787	20.4908	18.9232	19.707	20.273	23.8813	26.8804	29.205	28.9207	27.51	29.3404	31.8065	33.6188	29.7778	33.9632	34.5989	39.1615	31.1673	35.0416	28.7291	34.4766	12.2248	14.8	17.6248	10.8495	10.7761	9.9208	9.8401	12.0086	9.6548	9.262	8.8499	16.8473	14.7776	13.4425	20.9413	21.0698	21.3781	20.1753	22.4115	16.3713	23.3434	15.8053
599	31.242	31.2992	33.7016	32.9277	34.8578	20.0227	20.7363	20.4749	18.9113	19.6621	20.24	23.8148	26.8398	29.1329	28.8945	27.4456	29.3158	31.8711	33.6877	29.7883	33.9394	34.6462	39.0904	31.1188	35.0153	28.7326	34.4178	12.2124	14.751	17.59	10.838	10.7751	9.907	9.8287	12.0038	9.6447	9.2698	8.8353	16.8173	14.7442	13.4592	20.9127	21.0738	21.4235	20.1569	22.4502	16.385	23.3581	15.8209
600	31.2601	31.3802	33.6586	32.8992	34.8729	20.0028	20.772	20.475	18.9401	19.6894	20.2693	23.8514	26.9368	29.2031	28.8753	27.5389	29.4117	31.9425	33.7268	29.6907	33.929	34.66	39.0975	31.1643	35.0124	28.7307	34.409	12.2402	14.7578	17.6125	10.8354	10.8466	9.9564	9.8286	12.0444	9.7056	9.2669	8.8641	16.8134	14.7566	13.5225	20.958	21.0424	21.4262	20.155	22.4959	16.3488	23.3831	15.877
601	31.2779	31.4112	33.6652	32.8925	34.8547	19.988	20.7365	20.441	18.9143	19.6952	20.2716	23.8725	26.9912	29.328	28.8891	27.6258	29.465	31.9574	33.6359	29.572	33.8232	34.5224	39.0531	31.2211	34.9842	28.701	34.4171	12.2988	14.7588	17.5734	10.8329	10.8469	9.9991	9.8583	12.1086	9.7399	9.316	8.8814	16.8005	14.7516	13.5222	21.0024	21.0267	21.3484	20.16	22.4749	16.3622	23.3111	15.8909
602	31.2955	31.3617	33.5751	32.9005	34.7874	19.9474	20.6497	20.3761	18.8302	19.5917	20.2086	23.8435	26.931	29.2916	28.7978	27.5773	29.4755	31.895	33.4893	29.4882	33.7387	34.463	38.9878	31.2146	34.9685	28.6497	34.3976	12.2834	14.7143	17.4882	10.7994	10.8253	9.9814	9.8437	12.085	9.6941	9.3213	8.8409	16.7751	14.7144	13.4683	20.9422	21.0219	21.3186	20.0958	22.3578	16.3286	23.2774	15.893
603	31.2538	31.3329	33.5255	32.9578	34.7098	19.9311	20.5696	20.3276	18.7978	19.554	20.2027	23.857	26.9181	29.2472	28.769	27.5214	29.4291	31.8057	33.4471	29.4925	33.7575	34.5481	38.9206	31.2005	34.8824	28.5609	34.3922	12.2929	14.7542	17.4755	10.7715	10.8241	9.98	9.8416	12.068	9.6979	9.304	8.8247	16.7558	14.7023	13.4202	20.8999	21.1046	21.3109	20.0595	22.3562	16.3612	23.2395	15.887
604	31.1039	31.2451	33.4306	32.8887	34.5668	19.8506	20.5113	20.2202	18.6877	19.4527	20.1109	23.8069	26.8148	29.0693	28.6289	27.4272	29.2722	31.6742	33.3361	29.5112	33.6842	34.5172	38.774	31.1312	34.7328	28.4596	34.39	12.3085	14.7318	17.4464	10.6846	10.7768	9.959	9.7999	12.0091	9.6505	9.2663	8.7766	16.6782	14.6063	13.3408	20.7972	21.0647	21.2409	19.9878	22.2599	16.306	23.1279	15.8674
605	30.9571	31.0927	33.2707	32.688	34.3706	19.7312	20.4366	20.112	18.5278	19.3028	19.9711	23.6966	26.6444	28.8475	28.4708	27.3	29.0837	31.6265	33.3314	29.4938	33.6677	34.5317	38.6904	31.0821	34.6438	28.3541	34.3631	12.3119	14.6656	17.3741	10.5979	10.7322	9.9251	9.7651	11.939	9.6034	9.2479	8.7499	16.5972	14.4739	13.2305	20.6462	21.0993	21.2419	19.9676	22.2456	16.2754	23.0739	15.8718
606	30.8825	31.026	33.1577	32.6072	34.335	19.6794	20.3598	20.0571	18.4572	19.2093	19.8629	23.6276	26.5762	28.7231	28.4451	27.201	29.0118	31.5894	33.3816	29.5199	33.6191	34.5017	38.7046	30.9907	34.6099	28.3691	34.3151	12.2985	14.6259	17.3568	10.592	10.7465	9.9032	9.7626	11.872	9.596	9.2377	8.7898	16.5343	14.41	13.2405	20.6128	21.089	21.2274	19.9894	22.2483	16.2853	23.0239	15.9119
607	30.8875	30.974	33.0587	32.5554	34.3428	19.6664	20.2545	20.0529	18.4187	19.1119	19.8045	23.5322	26.4923	28.6806	28.3979	27.1593	28.9721	31.5617	33.416	29.5176	33.6283	34.4736	38.6095	30.928	34.5367	28.3362	34.2308	12.2773	14.5912	17.3335	10.5828	10.761	9.905	9.7507	11.85	9.582	9.2161	8.7811	16.4777	14.4148	13.2602	20.631	21.0441	21.2308	19.9775	22.2397	16.2837	23.0212	15.9084
608	30.8524	30.8978	32.9907	32.4034	34.2309	19.6138	20.1396	20.0035	18.3555	19.0309	19.726	23.4634	26.4476	28.5951	28.3276	27.1547	28.8919	31.4178	33.3252	29.4858	33.5865	34.3597	38.5735	30.8549	34.4405	28.3099	34.2086	12.2217	14.581	17.3265	10.5353	10.7414	9.8888	9.7207	11.8452	9.5404	9.2078	8.7105	16.4055	14.3742	13.242	20.5653	20.9593	21.1972	19.9418	22.1699	16.2345	22.9497	15.8971
609	30.8399	30.9149	32.9888	32.3508	34.2527	19.5754	20.0994	19.9844	18.3555	19.026	19.7547	23.5054	26.4687	28.623	28.3828	27.1378	28.8842	31.3305	33.1823	29.3986	33.429	34.2105	38.5945	30.7749	34.3902	28.2385	34.1805	12.238	14.5687	17.3118	10.5184	10.7403	9.9129	9.729	11.8647	9.56	9.2268	8.6995	16.4034	14.3611	13.2411	20.5486	20.8999	21.1439	19.9333	22.191	16.1649	22.9487	15.8687
610	30.9159	30.9343	33.0322	32.4064	34.3241	19.6142	20.1492	20.0359	18.3742	19.0515	19.8185	23.5867	26.5158	28.708	28.4963	27.2255	28.9501	31.2773	33.1345	29.3315	33.3313	34.0963	38.5369	30.6359	34.3116	28.2046	34.1206	12.312	14.5854	17.3636	10.5123	10.7908	9.9602	9.7566	11.9045	9.625	9.2863	8.7483	16.4739	14.3807	13.2643	20.6116	20.8699	21.1439	19.8388	22.1395	16.1362	22.9302	15.855
611	30.9077	30.8775	33.0006	32.3893	34.2256	19.6284	20.1582	19.9997	18.3514	19.023	19.7522	23.6105	26.5518	28.6664	28.5225	27.1991	28.8675	31.2126	33.1347	29.3523	33.2084	34.0427	38.3901	30.5636	34.2111	28.1888	34.0634	12.3653	14.6198	17.377	10.485	10.8042	9.9866	9.7778	11.9008	9.6256	9.3067	8.7619	16.4246	14.3631	13.2527	20.601	20.8534	21.1384	19.7691	22.0733	16.1231	22.8948	15.8411
612	30.856	30.8244	32.917	32.3849	34.1442	19.6271	20.128	19.9374	18.3137	18.9727	19.6948	23.5663	26.5064	28.6102	28.4927	27.1172	28.8143	31.1589	33.1027	29.3592	33.1296	34.0662	38.3634	30.5845	34.2551	28.2441	34.1051	12.3655	14.6284	17.3607	10.4822	10.8197	9.9943	9.7716	11.8591	9.5939	9.2928	8.741	16.3696	14.3101	13.2044	20.5563	20.8678	21.0695	19.7278	22.0335	16.1151	22.8751	15.8881
613	30.8804	30.8328	32.9852	32.4721	34.1636	19.6746	20.1135	19.979	18.3462	19.0274	19.75	23.6304	26.5888	28.6564	28.5867	27.1869	28.9156	31.1735	33.0796	29.3176	33.1278	34.0339	38.3158	30.5681	34.2355	28.2521	34.0867	12.4273	14.6572	17.392	10.4855	10.8713	10.0409	9.8059	11.9245	9.6306	9.3463	8.7553	16.416	14.3334	13.2405	20.6109	20.8949	21.0784	19.7333	22.0233	16.0875	22.8638	15.9327
614	30.8678	30.8767	33.0425	32.5206	34.1792	19.6593	20.1132	20.027	18.3658	19.0236	19.7489	23.6841	26.6777	28.6875	28.6424	27.2543	28.9761	31.1548	33.0252	29.3027	33.0449	33.9325	38.2393	30.5427	34.2214	28.2814	34.0803	12.4936	14.6725	17.4307	10.4661	10.8542	10.0648	9.8476	11.9715	9.6202	9.377	8.7422	16.4212	14.3754	13.2616	20.6389	20.8703	21.0357	19.7377	21.9985	16.0671	22.8695	15.9542
615	30.8285	30.8934	33.0018	32.5059	34.1101	19.6335	20.043	20.0307	18.3177	18.9522	19.6895	23.7189	26.6935	28.6692	28.6336	27.2626	28.9569	31.1134	33.0035	29.272	32.9222	33.8333	38.1481	30.546	34.2398	28.28	34.1018	12.5409	14.7181	17.47	10.4506	10.8347	10.0797	9.8549	12.0027	9.6526	9.4011	8.7731	16.4076	14.3608	13.2554	20.6206	20.7537	20.964	19.7137	21.9778	16.1338	22.7971	15.9676
616	30.8268	30.8487	32.9043	32.4853	34.0733	19.5897	19.998	20.0351	18.2561	18.8894	19.6706	23.6957	26.6127	28.5867	28.6363	27.2503	28.9291	31.0844	32.9152	29.2227	32.7994	33.7038	38.0816	30.5487	34.125	28.203	34.1235	12.5333	14.7229	17.4407	10.4209	10.7987	10.0748	9.8322	11.9447	9.6454	9.3874	8.7601	16.3691	14.3072	13.2344	20.6126	20.7249	20.9119	19.7342	21.9585	16.1309	22.7494	15.9725
617	30.7219	30.7657	32.8065	32.3988	34.03	19.5363	19.9596	19.9976	18.2116	18.8175	19.6347	23.6392	26.508	28.4823	28.6298	27.1884	28.8829	31.0435	32.817	29.1914	32.7168	33.6476	38.0875	30.5991	33.9906	28.1879	34.1016	12.5152	14.7225	17.4052	10.3772	10.7709	10.0632	9.8098	11.8534	9.6523	9.4017	8.7538	16.2964	14.2807	13.2078	20.5381	20.7566	20.9446	19.7362	21.9476	16.0915	22.7373	16.0069
618	30.5701	30.6638	32.6332	32.2725	33.8846	19.438	19.9139	19.9093	18.1215	18.724	19.5503	23.5052	26.4256	28.4118	28.4861	27.0792	28.7761	31.0239	32.7802	29.1385	32.6838	33.6413	38.0989	30.6141	33.961	28.2184	34.1711	12.4885	14.7041	17.3674	10.3347	10.779	10.0545	9.7793	11.8268	9.625	9.414	8.7636	16.2624	14.207	13.1659	20.4607	20.7289	20.9463	19.6988	21.9285	16.0434	22.75	16.0723
619	30.5168	30.61	32.5679	32.1934	33.8375	19.3798	19.8634	19.8537	18.024	18.6614	19.4613	23.4217	26.4038	28.3146	28.3942	27.0648	28.6436	30.9643	32.7033	29.0679	32.5878	33.5959	38.1025	30.5842	33.9216	28.1989	34.192	12.479	14.6825	17.3543	10.293	10.8015	10.0612	9.7665	11.8081	9.5953	9.3988	8.7522	16.2637	14.1709	13.1239	20.4183	20.7025	20.8946	19.6462	21.883	16.0252	22.7131	16.1135
620	30.4489	30.5739	32.5247	32.1046	33.7863	19.3167	19.7881	19.7881	17.952	18.5833	19.396	23.3495	26.3528	28.1888	28.3186	27.03	28.5246	30.9235	32.6417	29.0069	32.4539	33.5597	38.1681	30.6661	34.0169	28.2383	34.2546	12.4908	14.6383	17.3139	10.2459	10.8117	10.0595	9.7443	11.7996	9.576	9.4042	8.7303	16.1892	14.1857	13.0869	20.2758	20.6691	20.8195	19.6289	21.8918	16.025	22.6604	16.1617
621	30.4002	30.615	32.5885	32.107	33.8099	19.3393	19.7947	19.7843	17.9612	18.5533	19.4226	23.3481	26.3409	28.2035	28.2745	27.0508	28.4878	30.9245	32.6484	29.0196	32.446	33.544	38.1717	30.7411	34.0554	28.3323	34.3919	12.5795	14.6644	17.347	10.2707	10.8322	10.0888	9.7714	11.8629	9.6123	9.4344	8.7578	16.1481	14.2277	13.1033	20.2834	20.6906	20.8285	19.6499	21.8629	16.0388	22.6533	16.2721
622	30.4096	30.5951	32.6879	32.1857	33.9644	19.4241	19.8358	19.8208	18.0486	18.6	19.4639	23.4423	26.3792	28.2461	28.2918	27.1212	28.5416	30.8902	32.6309	28.968	32.3842	33.4575	38.1097	30.7534	34.0621	28.3567	34.4213	12.6729	14.7155	17.4217	10.3464	10.889	10.134	9.8424	11.9209	9.7012	9.478	8.8267	16.2081	14.2595	13.123	20.3876	20.6894	20.728	19.6148	21.8109	16.0274	22.6867	16.3669
623	30.371	30.5004	32.6677	32.1129	33.9808	19.415	19.8419	19.7899	18.0527	18.5779	19.4089	23.4397	26.3441	28.1866	28.306	27.1455	28.5394	30.9413	32.651	28.9546	32.378	33.3928	38.0463	30.6891	34.0393	28.2858	34.3722	12.7065	14.7457	17.389	10.3502	10.8978	10.1639	9.8534	11.931	9.7144	9.4914	8.8459	16.2334	14.2797	13.1138	20.3833	20.716	20.6639	19.5585	21.8314	16.0556	22.7009	16.3558
624	30.3804	30.4757	32.7042	32.0634	34.0537	19.3907	19.8671	19.7869	17.9821	18.5217	19.4179	23.3946	26.3151	28.1619	28.3098	27.1953	28.4875	30.9943	32.6457	28.9873	32.3743	33.3469	37.9893	30.6575	33.9808	28.2527	34.3457	12.7311	14.7897	17.4035	10.3431	10.8748	10.1448	9.851	11.9484	9.7086	9.4923	8.8403	16.2697	14.3111	13.1394	20.4037	20.7771	20.7241	19.569	21.86	16.0542	22.6842	16.3755
625	30.3942	30.5157	32.753	32.0822	34.0593	19.3551	19.8796	19.7859	17.9468	18.5182	19.4042	23.3799	26.337	28.1485	28.2935	27.1419	28.4752	30.9751	32.5473	28.9353	32.3491	33.3533	37.9292	30.6495	33.9198	28.2284	34.3305	12.7196	14.8163	17.4345	10.3425	10.8871	10.1988	9.8557	11.9846	9.7311	9.5215	8.8283	16.2755	14.3057	13.1776	20.4244	20.7532	20.6993	19.5686	21.8187	16.0374	22.6404	16.4185
626	30.341	30.5024	32.7328	32.0012	34.036	19.2677	19.8555	19.7509	17.9001	18.5313	19.3574	23.3679	26.3104	28.0795	28.2758	27.0702	28.4321	31.005	32.4923	28.9076	32.2944	33.392	37.997	30.6617	33.9332	28.2891	34.4282	12.6733	14.8191	17.5148	10.3361	10.8949	10.2575	9.88	11.9897	9.7526	9.5332	8.82	16.2761	14.3057	13.1731	20.3777	20.776	20.6778	19.5981	21.8077	16.0433	22.6515	16.5283
627	30.3133	30.4709	32.7524	31.9419	33.9932	19.2135	19.8731	19.6858	17.8963	18.5188	19.3085	23.307	26.2873	28.0418	28.2318	27.0338	28.3381	31.0006	32.4138	28.9072	32.2174	33.3815	38.0044	30.6625	33.8753	28.265	34.4437	12.6914	14.7912	17.5434	10.3218	10.8911	10.2571	9.8895	11.9872	9.7536	9.5542	8.8355	16.2762	14.322	13.15	20.3488	20.7612	20.6377	19.5969	21.7926	16.0477	22.6723	16.5563
628	30.2449	30.4032	32.7503	31.8581	33.9306	19.1403	19.8267	19.6276	17.8461	18.455	19.2648	23.1943	26.1415	27.9098	28.1263	26.9065	28.2131	30.9581	32.4098	28.8515	32.1562	33.4293	37.9716	30.6254	33.7748	28.14	34.3704	12.7055	14.7793	17.5451	10.2913	10.8722	10.2567	9.8668	11.9568	9.7466	9.5353	8.8429	16.2436	14.3006	13.0965	20.2913	20.7386	20.6155	19.5578	21.7907	16.0169	22.6566	16.5597
629	30.2044	30.4743	32.7241	31.8252	33.8968	19.1527	19.8187	19.6272	17.8143	18.4631	19.2269	23.212	26.2129	27.9106	28.0478	26.8984	28.2295	30.9055	32.3832	28.8209	32.1202	33.5017	37.9908	30.6728	33.7251	28.0619	34.3419	12.7365	14.8129	17.579	10.3003	10.9259	10.2892	9.8967	11.9489	9.7667	9.5526	8.8591	16.2699	14.2991	13.1186	20.312	20.6801	20.5858	19.5778	21.7758	16.0412	22.65	16.5434
630	30.3148	30.69	32.8804	31.9274	34.0561	19.2301	19.9187	19.7759	17.8837	18.6108	19.2887	23.3902	26.4552	28.1459	28.218	27.102	28.4274	30.7983	32.3638	28.7956	32.1088	33.4337	38.0568	30.6863	33.704	28.0561	34.3797	12.8763	14.9193	17.768	10.3622	11.0397	10.4136	9.9715	12.0355	9.8676	9.6426	8.913	16.481	14.4178	13.2331	20.4288	20.7102	20.5415	19.5604	21.7477	16.0242	22.6115	16.582
631	30.4295	30.7988	32.9805	32.0179	34.1023	19.3122	20.0054	19.8359	17.9292	18.666	19.3527	23.4902	26.5777	28.3406	28.3196	27.2061	28.4736	30.6921	32.3367	28.7955	32.1401	33.4057	38.1936	30.7239	33.7842	28.1213	34.4772	12.9529	14.9902	17.8829	10.39	11.0903	10.511	9.9974	12.1583	9.9518	9.6707	8.9841	16.6193	14.5028	13.27	20.5347	20.7074	20.5189	19.5659	21.7531	16.0189	22.6119	16.6282
632	30.5238	30.8361	33.0052	32.0812	34.1405	19.3488	20.0122	19.8255	17.9185	18.6729	19.3676	23.502	26.6215	28.4112	28.3221	27.1529	28.4482	30.6756	32.3513	28.866	32.1669	33.4155	38.2972	30.6223	33.7937	28.1611	34.4573	13.0025	15.0736	17.971	10.4124	11.1405	10.5425	10.0337	12.1876	9.973	9.6888	9.0226	16.6469	14.5448	13.3073	20.6185	20.6686	20.5198	19.5252	21.7675	16.0367	22.6393	16.6527
633	30.4876	30.8505	32.9923	32.0606	34.1456	19.3505	20.0057	19.7966	17.8946	18.6857	19.3721	23.505	26.5671	28.3827	28.3027	27.1755	28.4263	30.5976	32.3236	28.8485	32.0303	33.3538	38.3783	30.5188	33.8005	28.1078	34.4059	13.0469	15.0885	18.0164	10.4382	11.1296	10.6031	10.0646	12.1887	9.9761	9.7135	9.0412	16.6966	14.5533	13.3506	20.6463	20.6133	20.5121	19.461	21.6953	15.9865	22.5983	16.7529
634	30.46	30.8217	32.9523	32.0446	34.1557	19.3087	19.9754	19.7722	17.9071	18.711	19.3272	23.5207	26.5186	28.3875	28.302	27.1886	28.3925	30.4667	32.2519	28.8167	31.9176	33.3428	38.4161	30.5681	33.8049	28.0947	34.4773	13.0925	15.1002	18.0312	10.4602	11.1264	10.6661	10.0697	12.2075	9.9884	9.7316	9.0802	16.7217	14.5864	13.2977	20.6453	20.6005	20.5713	19.4329	21.6348	15.9267	22.6264	16.864
635	30.4747	30.836	33.0313	32.033	34.2252	19.3255	20.0026	19.7637	17.9488	18.7349	19.2736	23.4975	26.5632	28.4087	28.3015	27.2525	28.3887	30.4338	32.1967	28.7595	31.8473	33.3494	38.4758	30.5808	33.7488	28.0532	34.5277	13.1295	15.1632	18.0995	10.4663	11.1714	10.7004	10.1046	12.2714	10.0187	9.7748	9.1091	16.6948	14.595	13.3016	20.6699	20.5843	20.6	19.4047	21.573	15.9596	22.6531	16.9163
636	30.5302	30.8116	33.0302	31.9667	34.2147	19.3342	20.041	19.775	17.921	18.7372	19.2894	23.4661	26.5262	28.4173	28.3021	27.2823	28.4337	30.4308	32.1919	28.7541	31.8502	33.3157	38.5735	30.6632	33.8201	28.0585	34.5718	13.16	15.2187	18.1441	10.4597	11.2835	10.7599	10.1439	12.3469	10.1061	9.8233	9.146	16.6708	14.6471	13.3686	20.6994	20.5846	20.5865	19.3958	21.5972	16.0254	22.5829	16.9831
637	30.5576	30.858	33.0438	31.949	34.2604	19.394	20.1075	19.8315	17.9597	18.7609	19.3447	23.5564	26.6072	28.5584	28.4039	27.3782	28.5539	30.4972	32.2803	28.8163	31.8146	33.3547	38.61	30.6572	33.8765	28.1056	34.5313	13.2675	15.2773	18.2449	10.4995	11.3431	10.8233	10.2072	12.4245	10.1749	9.8535	9.2229	16.8115	14.7904	13.5237	20.8125	20.6239	20.6353	19.4495	21.6522	16.0622	22.6129	17.0636
638	30.6117	30.875	32.965	31.9517	34.2764	19.3868	20.1093	19.8428	18.0424	18.7845	19.3794	23.6183	26.6945	28.6323	28.4622	27.4153	28.622	30.5037	32.309	28.8413	31.7499	33.2672	38.5503	30.6356	33.8742	28.0779	34.3871	13.3329	15.3186	18.3516	10.5274	11.3403	10.8876	10.2416	12.4507	10.1799	9.9188	9.2307	16.8911	14.8493	13.6106	20.9129	20.6118	20.6119	19.432	21.6964	16.0509	22.6249	17.0967
639	30.5471	30.8224	32.8798	31.9366	34.2141	19.321	20.0951	19.7961	18.0135	18.7635	19.3428	23.6154	26.6581	28.6519	28.3863	27.4032	28.6345	30.4776	32.3022	28.8642	31.7669	33.2194	38.4991	30.6372	33.9875	28.0602	34.3421	13.3401	15.3143	18.3582	10.5436	11.3713	10.9281	10.2497	12.4876	10.1934	9.9562	9.2393	16.932	14.8608	13.6559	20.9457	20.5652	20.5554	19.3918	21.6676	15.9875	22.6194	17.1151
640	30.5535	30.8759	32.9306	32.0046	34.2882	19.3616	20.1751	19.8328	18.0116	18.7607	19.3878	23.6883	26.7113	28.7561	28.4727	27.4839	28.7252	30.3971	32.3001	28.8213	31.7985	33.2698	38.4459	30.5626	34.0018	28.0845	34.287	13.4342	15.3521	18.4281	10.6233	11.4717	11.0182	10.3019	12.5775	10.2265	9.9774	9.3282	17.0317	14.9141	13.7118	21.014	20.5633	20.5245	19.3484	21.6031	15.9274	22.5946	17.1547
641	30.4334	30.8316	32.8381	31.9106	34.1359	19.3452	20.1327	19.7688	17.9756	18.6707	19.3619	23.5877	26.6449	28.725	28.3553	27.4373	28.6367	30.413	32.3668	28.8667	31.8964	33.34	38.441	30.5127	33.933	28.1427	34.262	13.4109	15.3784	18.4336	10.6292	11.5059	11.0356	10.3705	12.5548	10.238	9.9573	9.4118	17.0389	14.895	13.6786	20.9748	20.6538	20.5681	19.349	21.6637	15.9938	22.566	17.1894
642	30.4236	30.827	32.7563	31.8848	34.0659	19.3586	20.1179	19.7583	17.9907	18.6468	19.3065	23.5477	26.6197	28.6951	28.3277	27.4203	28.5752	30.3643	32.434	28.9151	32.026	33.3645	38.4448	30.476	33.9265	28.1294	34.2153	13.4258	15.3708	18.4222	10.6391	11.4966	11.0728	10.3699	12.5669	10.2295	9.9455	9.3965	17.0591	14.8696	13.6795	20.9486	20.6729	20.5976	19.4087	21.7403	16.1147	22.641	17.2292
643	30.4175	30.8402	32.8223	31.9689	34.0636	19.3754	20.1601	19.854	18.0011	18.6787	19.3342	23.6188	26.6851	28.7996	28.3893	27.4527	28.6002	30.2551	32.3947	28.8569	31.9667	33.2915	38.4757	30.4173	33.9259	28.1068	34.2223	13.4689	15.4083	18.4587	10.6594	11.5068	11.1468	10.4217	12.6645	10.3107	9.9809	9.39	17.1206	14.8942	13.7273	20.9823	20.5906	20.5722	19.3987	21.7045	16.0648	22.6302	17.2667
644	30.4941	30.8404	32.8198	32.0072	34.1469	19.3798	20.2465	19.8891	18.0841	18.6894	19.3918	23.6449	26.742	28.9068	28.4953	27.5589	28.6387	30.234	32.3463	28.7666	31.9463	33.2666	38.5801	30.4517	34.0646	28.161	34.2203	13.5651	15.4936	18.5659	10.7033	11.5991	11.1984	10.4597	12.7246	10.362	10.0958	9.4399	17.1296	14.9373	13.8404	21.126	20.5851	20.5903	19.3949	21.7443	16.0674	22.6138	17.4083
645	30.5267	30.8781	32.8155	32.0783	34.2268	19.4591	20.2725	19.9025	18.1176	18.7044	19.4406	23.6674	26.7967	28.9335	28.5966	27.6281	28.6807	30.2361	32.3679	28.8161	32.0001	33.2262	38.6013	30.4628	34.1157	28.195	34.1112	13.6412	15.5475	18.6228	10.7681	11.6573	11.2444	10.5261	12.8207	10.4107	10.1581	9.5543	17.1528	15.04	13.9424	21.2518	20.639	20.6338	19.3519	21.7566	16.1075	22.5988	17.5005
646	30.427	30.7521	32.7183	31.9371	34.0904	19.3603	20.1208	19.7926	18.0357	18.6068	19.3833	23.5867	26.7039	28.8552	28.4731	27.5298	28.6601	30.2351	32.3529	28.817	31.9993	33.2368	38.5738	30.3935	34.1091	28.1981	34.0797	13.618	15.5009	18.6197	10.7234	11.6239	11.2126	10.5528	12.7913	10.3468	10.1278	9.5539	17.1292	14.9877	13.9387	21.245	20.7244	20.6284	19.2879	21.67	16.0998	22.5144	17.5331
647	30.4284	30.6463	32.6994	31.8962	34.0135	19.2995	20.1327	19.7631	18.0507	18.5859	19.3579	23.5997	26.637	28.8536	28.4005	27.4787	28.6309	30.1284	32.2474	28.742	31.9162	33.1812	38.4976	30.2511	34.0682	28.132	33.9976	13.6335	15.4798	18.6222	10.7127	11.5956	11.1973	10.584	12.7828	10.3786	10.1803	9.5843	17.1777	14.9534	13.9118	21.2386	20.6839	20.6002	19.1939	21.6663	16.0651	22.5079	17.5206
648	30.3921	30.603	32.744	31.8351	34.023	19.2502	20.1611	19.7664	18.0325	18.6374	19.3623	23.6053	26.5515	28.8405	28.3622	27.4631	28.5936	30.1113	32.1027	28.7811	31.935	33.0988	38.3481	30.1649	34.0115	28.0763	33.9332	13.721	15.5046	18.6809	10.7471	11.6242	11.1901	10.6216	12.8068	10.3616	10.2158	9.5881	17.1768	14.9385	13.9155	21.241	20.6112	20.5921	19.2409	21.7827	16.0927	22.531	17.5005
649	30.4374	30.6671	32.7416	31.8987	34.0905	19.3053	20.2349	19.7928	18.0262	18.6731	19.4171	23.7429	26.6091	28.8974	28.5001	27.5702	28.6082	30.0775	32.0969	28.8007	31.9265	33.1521	38.215	30.0867	33.8926	28.0541	33.8723	13.7703	15.5313	18.7715	10.7093	11.7159	11.2548	10.6489	12.9096	10.4103	10.2324	9.6749	17.2271	14.9491	13.9943	21.3181	20.6426	20.5737	19.2268	21.7622	16.1313	22.4763	17.4644
650	30.4008	30.7703	32.6484	31.963	34.1806	19.3383	20.2427	19.8946	18.1081	18.6893	19.4763	23.85	26.7096	28.916	28.62	27.6127	28.6461	30.0045	32.1247	28.7153	31.7817	33.1205	38.0668	29.985	33.7919	27.9765	33.7705	13.7741	15.6172	18.865	10.7705	11.8433	11.3529	10.6886	12.9954	10.4934	10.3328	9.7675	17.2491	15.0037	14.09	21.4399	20.5978	20.591	19.1394	21.6413	16.0835	22.4261	17.4835
651	30.2556	30.7785	32.5634	31.8754	34.1191	19.3182	20.1623	19.8522	18.0966	18.6099	19.4622	23.8218	26.6964	28.9035	28.5447	27.5	28.6471	29.8702	32.0594	28.6209	31.7297	33.0192	38.0388	29.8968	33.7397	27.9037	33.7493	13.8048	15.6215	18.8744	10.838	11.85	11.4553	10.7157	12.9468	10.4763	10.3604	9.7844	17.2011	14.9922	14.0815	21.4612	20.5446	20.6492	19.1141	21.6501	16.0165	22.4356	17.5278
652	30.4048	30.9448	32.6996	31.9001	34.2157	19.4185	20.3059	19.8601	18.2104	18.7111	19.5792	23.9693	26.8134	29.0656	28.6624	27.6363	28.7668	29.8094	32.0451	28.598	31.7141	33.0905	38.0725	29.9408	33.7539	27.9539	33.7281	13.9708	15.7098	18.9707	10.9041	11.8742	11.5998	10.8056	13.0471	10.5266	10.3905	9.8446	17.3524	15.0746	14.1605	21.5406	20.5121	20.6824	19.1166	21.7361	16.0825	22.4274	17.5588
653	30.4848	31.0608	32.8614	31.9678	34.3667	19.5505	20.5211	20.0173	18.3233	18.8486	19.7016	24.1342	27.0446	29.2338	28.8387	27.8058	28.8436	29.7821	32.0121	28.6355	31.7594	33.0977	38.2029	30.1803	33.9176	28.0656	33.7492	14.1223	15.8427	19.1187	10.9949	11.9442	11.7377	10.9422	13.2421	10.6534	10.5081	10.0024	17.5297	15.2136	14.3394	21.7878	20.5691	20.6284	19.1964	21.7248	16.086	22.3948	17.7249
654	30.5473	31.0554	32.8903	32.0254	34.425	19.5492	20.5304	19.9828	18.366	18.9214	19.7054	24.1702	27.0835	29.2065	28.8716	27.841	28.8137	29.7908	31.9147	28.5619	31.667	33.0539	38.2534	30.2087	34.0352	28.1252	33.7421	14.1495	15.842	19.179	11.0706	11.9818	11.7619	11.0129	13.3033	10.7078	10.6028	10.0367	17.6287	15.2506	14.4365	21.8898	20.6816	20.6386	19.1129	21.7496	16.0499	22.3474	17.8142
655	30.5577	31.0159	32.8642	31.9882	34.4025	19.4678	20.4939	19.9075	18.4015	18.909	19.6571	24.1696	27.0298	29.1352	28.7939	27.8125	28.8327	29.7938	31.9133	28.5141	31.6198	33.1501	38.3376	30.2475	34.1107	28.1577	33.7819	14.1641	15.8323	19.1491	11.0755	12.0198	11.7525	11.0329	13.3334	10.7206	10.6511	10.0794	17.5973	15.2809	14.4387	21.8151	20.6988	20.7284	19.0405	21.8663	16.0812	22.4282	17.9641
656	30.4507	30.942	32.7347	31.9134	34.3517	19.3587	20.3518	19.8653	18.3654	18.816	19.5103	24.1792	26.9141	29.0498	28.6945	27.7545	28.7322	29.8232	32.0391	28.5755	31.7458	33.3544	38.2221	30.2223	34.0548	28.1162	33.8137	14.1577	15.7949	19.0358	11.0625	11.9487	11.7362	10.9985	13.2997	10.7177	10.6395	10.0967	17.5447	15.1926	14.4497	21.7436	20.6718	20.7554	19.1763	21.9391	16.1822	22.5082	18.0148
657	30.4165	31.0465	32.7722	31.9598	34.3711	19.4364	20.3482	19.8798	18.4303	18.8214	19.5316	24.2162	26.9233	29.1386	28.7564	27.7552	28.7718	29.6738	32.0091	28.5423	31.7459	33.2906	38.0349	30.1552	33.9162	28.1832	33.7923	14.2524	15.9538	19.0607	11.1748	12.008	11.8471	11.0934	13.4121	10.751	10.6837	10.1363	17.5962	15.1799	14.5108	21.8356	20.7672	20.7659	19.2117	21.9618	16.25	22.5113	18.1
658	30.3805	30.9827	32.6843	31.9152	34.3379	19.4486	20.3531	19.8439	18.4169	18.8444	19.5665	24.2655	26.9549	29.118	28.7716	27.7442	28.7692	29.5923	31.932	28.3872	31.5997	33.1705	38.0109	30.197	33.9576	28.3042	33.8776	14.2556	16.0241	19.0637	11.2323	12.071	11.9495	11.1535	13.4731	10.7437	10.6986	10.2348	17.6169	15.1777	14.5843	21.8501	20.7435	20.7941	19.1919	21.891	16.2849	22.467	18.2453
659	30.432	30.9876	32.6609	31.9371	34.3974	19.547	20.4232	19.9271	18.4075	18.8855	19.5335	24.2799	27.0374	29.1575	28.8135	27.7551	28.8105	29.6126	31.9004	28.2715	31.5122	33.0999	38.0138	30.2132	34.0535	28.4329	33.9677	14.3203	16.1108	19.1269	11.257	12.164	11.9977	11.2359	13.565	10.8215	10.7564	10.324	17.635	15.2921	14.6838	21.9269	20.6974	20.7666	19.1802	21.8239	16.2159	22.4209	18.3344
660	30.3896	30.9185	32.6054	31.9047	34.3345	19.5405	20.4557	19.9497	18.3569	18.8201	19.4279	24.279	26.9964	29.1154	28.7682	27.7019	28.7502	29.4364	31.7611	28.268	31.5014	33.0372	37.8924	30.126	33.9343	28.3167	33.9741	14.365	16.0789	19.1618	11.2703	12.1919	11.9836	11.2485	13.5787	10.8718	10.7689	10.3319	17.5512	15.3289	14.6553	21.9578	20.606	20.7697	19.1097	21.826	16.1505	22.4061	18.3276
661	30.2885	30.9138	32.5234	31.8157	34.2252	19.478	20.3434	19.9158	18.3308	18.7977	19.3358	24.2633	26.9269	28.9942	28.7178	27.6363	28.6723	29.4343	31.7163	28.2623	31.5246	33.0386	37.7239	30.004	33.8657	28.1466	33.975	14.3805	16.0454	19.1918	11.2402	12.1593	11.957	11.2297	13.4998	10.8437	10.7733	10.3192	17.5314	15.264	14.6405	22.0091	20.6331	20.7662	19.0522	21.8435	16.1718	22.4139	18.2815
662	30.2795	30.854	32.4839	31.8105	34.131	19.4431	20.328	19.9126	18.3689	18.7945	19.3651	24.3043	26.9298	28.9657	28.7331	27.6832	28.7517	29.473	31.6762	28.2867	31.5169	33.1393	37.7027	30.0634	33.9685	28.1086	34.0224	14.4111	16.0753	19.2839	11.2775	12.2589	12.0016	11.3473	13.5383	10.8822	10.7928	10.3756	17.6135	15.1887	14.7459	22.0919	20.6461	20.8174	19.0642	21.8299	16.2422	22.4547	18.321
663	30.3201	30.8979	32.5468	31.9657	34.0675	19.4702	20.3481	19.8826	18.3738	18.8071	19.4743	24.3254	26.9792	29.045	28.7333	27.7686	28.8341	29.3686	31.6528	28.361	31.5565	33.0936	37.7566	30.0857	33.9983	28.1559	34.1478	14.4268	16.1075	19.2996	11.4346	12.3433	12.0825	11.377	13.6604	10.9179	10.8288	10.4699	17.712	15.2509	14.8804	22.1249	20.758	20.8999	19.0864	21.8417	16.2018	22.4065	18.3595
664	30.4196	30.98	32.5768	32.0627	34.0912	19.5912	20.4144	19.9729	18.4076	18.9533	19.5706	24.3946	27.1016	29.1317	28.7325	27.9542	28.9914	29.3494	31.5684	28.277	31.4996	32.9939	37.8232	30.1374	34.0888	28.227	34.2868	14.5763	16.2026	19.3714	11.607	12.4572	12.2318	11.4626	13.7872	11.0316	10.9215	10.5603	17.7604	15.4098	15.0388	22.2443	20.6896	20.9437	19.0597	21.8737	16.2129	22.3943	18.5195
665	30.5548	31.1369	32.7446	32.1196	34.1634	19.7144	20.4675	20.0753	18.4884	19.1016	19.6853	24.5012	27.2051	29.1931	28.8199	28.1332	29.0737	29.4558	31.5784	28.2272	31.4503	33.0324	37.7135	30.0594	34.055	28.193	34.2229	14.6655	16.3396	19.426	11.6782	12.5476	12.3808	11.6591	13.9691	11.1351	10.9299	10.6656	17.8112	15.5344	15.2051	22.3919	20.6629	20.9583	19.114	21.976	16.3086	22.3846	18.5798
666	30.6076	31.1591	32.8035	32.1752	34.1899	19.707	20.4977	20.1051	18.4745	19.0827	19.6583	24.5273	27.2504	29.1485	28.7889	28.1842	29.065	29.4647	31.5203	28.21	31.3818	33.0502	37.5887	30.0382	34.0989	28.2109	34.2159	14.6586	16.4303	19.4954	11.6047	12.5723	12.3837	11.6773	13.9331	11.1605	10.9126	10.6978	17.8728	15.4915	15.2205	22.4033	20.6867	20.9031	19.159	22.0321	16.3203	22.3665	18.601
667	30.5423	31.084	32.7809	32.2043	34.0682	19.6843	20.4463	20.0222	18.3964	18.9403	19.6006	24.4976	27.2639	29.2094	28.7554	28.1157	29.1318	29.3327	31.3101	28.164	31.3203	32.9403	37.5425	30.0182	34.1647	28.2353	34.1903	14.6218	16.447	19.4731	11.6006	12.5578	12.4097	11.6563	13.8787	11.1306	10.9151	10.7244	17.8477	15.417	15.1992	22.3922	20.6176	20.8219	19.1737	21.8499	16.2141	22.3248	18.6701
668	30.5131	30.9587	32.7257	32.1092	34.013	19.592	20.3537	20.0106	18.3467	18.8747	19.5764	24.5401	27.2532	29.2708	28.7373	28.0786	29.1451	29.2863	31.1564	28.137	31.2698	32.7304	37.6006	30.0877	34.1763	28.3486	34.173	14.6169	16.4075	19.392	11.5825	12.5283	12.4077	11.662	13.8963	11.0532	10.9444	10.7258	17.8123	15.3821	15.1857	22.3847	20.6393	20.7676	19.1604	21.6527	16.154	22.3282	18.7452
669	30.5568	30.9215	32.6663	31.9685	34.0119	19.5314	20.2372	20.0526	18.27	18.941	19.5625	24.5262	27.29	29.2783	28.751	28.0823	29.1963	29.1871	31.1575	28.0613	31.1637	32.7466	37.7241	30.176	34.2271	28.3497	34.2234	14.6593	16.3915	19.4872	11.6566	12.6035	12.4237	11.6787	13.9384	11.1716	10.9783	10.7585	17.8244	15.3588	15.1862	22.464	20.6317	20.785	19.1841	21.6545	16.2052	22.3028	18.9186
670	30.4639	30.9333	32.4845	31.8967	34.0135	19.5215	20.1335	20.0361	18.2882	18.8974	19.5371	24.4761	27.2645	29.2893	28.6714	28.0752	29.1735	29.3143	31.2219	28.0545	31.1257	32.7465	37.7113	30.1524	34.2415	28.3198	34.1388	14.7179	16.3763	19.5196	11.6493	12.6024	12.4496	11.6706	13.9846	11.2595	10.9391	10.7981	17.8524	15.3472	15.2376	22.4635	20.6365	20.7531	19.1963	21.6644	16.2279	22.2737	18.9727
671	30.4611	30.9235	32.4354	31.9326	34.0219	19.5256	20.1418	20.015	18.31	18.8223	19.4966	24.485	27.2928	29.2121	28.6281	28.1195	29.1453	29.4225	31.2191	28.1326	31.1343	32.8426	37.5544	30.1315	34.2289	28.2768	33.9912	14.8091	16.3975	19.56	11.6757	12.6732	12.4643	11.751	13.9762	11.2511	10.9071	10.8415	17.7954	15.3849	15.2888	22.4707	20.666	20.828	19.2121	21.627	16.3206	22.3732	19.0111
672	30.6094	30.966	32.5286	32.0454	34.0627	19.545	20.2195	20.0121	18.3436	18.8035	19.5287	24.5608	27.3795	29.2689	28.81	28.1634	29.2193	29.3894	31.151	28.1384	31.0464	32.7751	37.3659	30.0204	34.0768	28.234	33.8891	14.9359	16.4393	19.6661	11.763	12.7601	12.5704	11.8756	14.0902	11.2744	10.9611	10.883	17.8496	15.5191	15.4126	22.4869	20.6698	20.8371	19.3242	21.6854	16.3405	22.4212	18.9191
673	30.6544	31.0088	32.4931	32.0247	34.0712	19.5247	20.2212	19.9272	18.2993	18.7987	19.5033	24.5774	27.3899	29.3381	28.8733	28.1339	29.2188	29.359	31.1034	28.123	30.9282	32.7377	37.2592	29.9498	33.9464	28.0928	33.7901	14.9474	16.4115	19.6055	11.7482	12.793	12.6081	11.8774	14.0863	11.3279	10.9832	10.9218	17.8932	15.5267	15.4363	22.5136	20.6146	20.862	19.3478	21.6984	16.3357	22.4378	18.9026
674	30.7459	31.0333	32.5717	32.0928	34.1987	19.5997	20.3067	20.0081	18.3357	18.9208	19.5759	24.6051	27.4512	29.3511	28.9108	28.1263	29.2906	29.336	31.0716	28.1515	30.8455	32.8242	37.263	29.9398	34.0953	28.0519	33.8646	14.9649	16.5329	19.6773	11.8106	12.8484	12.6627	11.9985	14.1178	11.4495	11.0564	11.0028	18.0025	15.5482	15.5318	22.6559	20.5997	20.8263	19.3676	21.6978	16.41	22.5239	19.081
675	30.6468	31.0318	32.6426	32.008	34.1676	19.5908	20.2225	20.0238	18.3126	18.8889	19.5545	24.6671	27.4903	29.3332	28.9538	28.1197	29.2843	29.2743	30.9354	28.1692	30.8291	32.6914	37.1708	29.8837	34.1366	28.0803	33.936	14.9815	16.5764	19.7195	11.8538	12.8649	12.6296	11.9945	14.1446	11.4814	11.0168	10.9875	18.0513	15.565	15.4907	22.7286	20.6101	20.7222	19.3341	21.728	16.4689	22.5866	19.168
676	30.6634	31.0764	32.7274	32.012	34.1954	19.5423	20.1811	19.9996	18.2087	18.8749	19.4671	24.7023	27.4482	29.3736	28.945	28.1788	29.2612	29.1065	30.9162	28.1725	30.8154	32.5514	36.9888	29.8549	34.0289	28.1188	33.8861	15.0766	16.5662	19.7627	11.8663	12.9056	12.6623	11.9914	14.185	11.4481	11.0378	10.9585	18.0083	15.5495	15.526	22.6958	20.6135	20.7554	19.3631	21.6737	16.3883	22.4985	19.1468
677	30.6356	31.1265	32.7485	31.9409	34.2249	19.5114	20.1279	20.0154	18.1836	18.8274	19.4282	24.7026	27.3881	29.3336	28.9341	28.1667	29.1896	29.0698	30.9957	28.1716	30.7516	32.4815	36.9199	29.8741	33.9728	28.0538	33.8181	15.0838	16.59	19.8405	11.8406	12.9011	12.7319	12.007	14.1565	11.3938	11.0576	10.9919	17.9623	15.5299	15.566	22.7206	20.5688	20.7375	19.3289	21.6408	16.364	22.4639	19.1476
678	30.6735	31.1773	32.7114	31.8486	34.1653	19.4542	20.13	20.0318	18.2738	18.8274	19.4472	24.6731	27.3083	29.331	28.9408	28.221	29.2177	29.1776	31.0824	28.1867	30.8158	32.6409	36.8847	29.8548	33.9623	27.9876	33.824	15.1451	16.6052	19.9317	11.8441	12.9896	12.8397	12.0464	14.1745	11.4412	11.1205	11.0298	17.9821	15.5583	15.6852	22.8122	20.7393	20.8803	19.3666	21.771	16.4311	22.463	19.1977
679	30.6593	31.2855	32.6574	31.8521	34.2221	19.4385	20.2182	20.0804	18.2932	18.8119	19.4612	24.6852	27.3728	29.4535	29.074	28.3116	29.2994	29.1935	31.0228	28.2227	30.8303	32.4972	37.0032	29.9716	34.108	28.0308	33.945	15.1915	16.6691	20.0682	11.9189	13.0481	12.8532	12.133	14.2598	11.5186	11.1012	11.1159	18.0257	15.5894	15.7713	22.8282	20.7407	20.8564	19.4275	21.701	16.4241	22.4685	19.3239
680	30.6881	31.3929	32.7786	31.8585	34.2514	19.4744	20.2247	20.071	18.2797	18.8601	19.3973	24.7731	27.4528	29.5185	29.187	28.4374	29.3358	29.1921	30.9529	28.1402	30.7157	32.4516	37.0326	29.9346	34.1666	28.0782	34.0129	15.2441	16.7302	20.1473	11.9608	13.0732	12.8485	12.1915	14.2874	11.5565	11.0529	11.1625	18.113	15.5867	15.7904	22.848	20.7461	20.8023	19.3932	21.6611	16.3967	22.5611	19.4096
681	30.6584	31.3927	32.8562	31.7838	34.1082	19.4582	20.231	20.0282	18.2622	18.8705	19.4209	24.767	27.5091	29.4477	29.2243	28.4905	29.3034	29.2866	30.9791	28.0902	30.8383	32.4205	36.9917	29.9641	34.2091	28.1328	33.9862	15.3311	16.7888	20.1433	11.999	13.077	12.8828	12.1731	14.3093	11.5575	11.0534	11.1735	18.149	15.5675	15.8183	22.8943	20.7933	20.8646	19.4812	21.6825	16.4098	22.6378	19.5058
682	30.5352	31.2716	32.7115	31.662	33.9738	19.3384	20.1771	19.8916	18.1196	18.7724	19.2889	24.7117	27.3999	29.3338	29.1313	28.4151	29.1105	29.2615	30.9756	28.0899	30.8308	32.4826	36.9703	29.9743	34.2223	28.1404	33.9354	15.304	16.7504	20.1682	11.9897	12.9698	12.8012	12.0765	14.1926	11.4703	11.0167	11.0499	18.0149	15.5229	15.7719	22.8379	20.6963	20.9644	19.4729	21.7332	16.4632	22.6331	19.6262
683	30.5428	31.1909	32.6785	31.6254	33.9503	19.3575	20.1698	19.777	18.0986	18.7624	19.3096	24.6621	27.424	29.3361	29.1057	28.3456	29.072	29.2455	31.0545	28.2255	30.8543	32.4973	37.042	30.1078	34.2744	28.2416	34.0472	15.3333	16.7428	20.2601	11.9769	13.0313	12.8458	12.1355	14.2045	11.5404	11.1095	11.0856	18.0198	15.5805	15.855	22.8323	20.6592	21.0467	19.4578	21.75	16.5121	22.6451	19.8012
684	30.4288	31.1252	32.5825	31.4682	33.9014	19.3007	20.0922	19.722	18.0238	18.6694	19.2083	24.5948	27.2734	29.268	29.0811	28.1562	28.9805	29.2019	31.0837	28.3675	30.8463	32.471	36.9255	30.1481	34.1856	28.3316	34.0995	15.3132	16.7144	20.2448	11.9206	13.1089	12.8501	12.126	14.2588	11.5376	11.0293	11.0954	18.0419	15.5016	15.7357	22.7926	20.8463	21.0468	19.5479	21.7725	16.5768	22.7201	19.9544
685	30.4184	31.1759	32.4731	31.3627	33.8586	19.3075	20.1316	19.7919	18.0596	18.5531	19.1374	24.5418	27.1198	29.252	29.121	28.0592	28.9278	29.1831	31.0599	28.3636	30.7442	32.5478	36.8837	30.2185	34.2918	28.3681	34.1892	15.275	16.819	20.2835	11.9363	13.1617	12.8591	12.1121	14.1952	11.5124	10.9562	11.0683	18.0264	15.4655	15.7161	22.7525	20.8996	21.0166	19.6399	21.7433	16.6369	22.715	20.0657
686	30.4707	31.1734	32.5227	31.3364	33.8463	19.3482	20.1581	19.8157	18.1031	18.559	19.1121	24.6016	27.1902	29.2398	29.2411	28.0939	28.9172	29.2912	31.1475	28.4389	30.8626	32.6263	36.8418	30.2019	34.4	28.3392	34.2065	15.3146	16.8987	20.3294	11.9944	13.2705	12.9116	12.1484	14.2114	11.5873	11.0169	11.1105	18.0747	15.595	15.7852	22.7944	20.9096	21.0645	19.7703	21.7823	16.6631	22.7572	20.1113
687	30.5625	31.2481	32.681	31.4852	34.0514	19.3853	20.2782	19.8642	18.245	18.7215	19.2302	24.8239	27.3545	29.4178	29.3502	28.2437	29.0627	29.2567	31.1293	28.5651	30.9765	32.6381	36.867	30.1514	34.3793	28.2959	34.1985	15.4476	16.9676	20.4419	12.0746	13.3478	12.9072	12.2541	14.3208	11.6807	11.1256	11.1781	18.166	15.7387	15.8953	22.9604	20.9762	21.1119	19.7951	21.8638	16.7126	22.7191	20.1849
688	30.6258	31.2774	32.7292	31.56	34.1669	19.5126	20.3648	19.893	18.2416	18.8324	19.2704	24.932	27.4358	29.5274	29.4574	28.283	29.1909	29.1875	31.0448	28.4147	30.9882	32.6111	36.8187	30.0958	34.2677	28.2688	34.073	15.5558	16.9938	20.457	12.1821	13.4275	12.9786	12.3403	14.4141	11.7635	11.2024	11.229	18.2092	15.7712	15.9634	23.0042	21.0679	21.097	19.8213	21.8134	16.7323	22.6641	20.1338
689	30.7695	31.4024	32.8402	31.6749	34.2426	19.5828	20.4837	19.9651	18.3089	18.877	19.3311	24.9465	27.5138	29.6179	29.532	28.3891	29.3173	29.2746	31.1184	28.3974	30.9624	32.6121	36.736	30.1229	34.2903	28.2513	33.9624	15.6741	17.0184	20.4853	12.2506	13.5506	13.0917	12.3729	14.5366	11.866	11.3359	11.3998	18.2636	15.8499	16.0565	23.0377	21.065	21.1627	19.8654	21.842	16.6685	22.7543	20.1835
690	30.846	31.4436	32.8655	31.7194	34.3285	19.6547	20.5459	20.0413	18.4583	18.9493	19.409	24.9553	27.6335	29.6719	29.6197	28.4971	29.3697	29.2914	31.1294	28.4261	30.9715	32.7279	36.6516	30.0653	34.325	28.2202	33.8975	15.7816	17.0914	20.5397	12.3387	13.6828	13.1835	12.4455	14.6051	11.9719	11.4176	11.5346	18.3795	15.9411	16.1976	23.1389	20.9536	21.181	19.9147	21.8202	16.6994	22.8244	20.2264
691	30.8064	31.4164	32.8054	31.6983	34.3127	19.6763	20.4959	20.0465	18.4594	18.9315	19.3353	24.8851	27.6217	29.696	29.5567	28.4518	29.4046	29.2695	31.0439	28.4742	30.9436	32.7381	36.8112	30.1035	34.2705	28.2325	33.9355	15.7451	17.1628	20.5022	12.3577	13.6554	13.2122	12.4829	14.6401	11.9637	11.3829	11.5406	18.4207	15.9674	16.169	23.1016	20.9635	21.1694	20.0192	21.8527	16.6707	22.819	20.3698
692	30.7999	31.5329	32.8868	31.703	34.3842	19.6531	20.5316	20.0942	18.4921	18.9429	19.3094	24.9807	27.6276	29.8489	29.5831	28.4043	29.4833	29.24	31.0297	28.5728	31.0137	32.7364	36.9234	30.1901	34.312	28.2026	33.8789	15.777	17.1574	20.5956	12.384	13.7568	13.299	12.5403	14.6372	12.0539	11.4409	11.6113	18.4497	16.0291	16.1764	23.1602	20.9353	21.1392	20.0694	21.7913	16.7523	22.7463	20.4379
693	30.8638	31.7348	33.0923	31.7394	34.4937	19.7021	20.6683	20.1506	18.6015	19.0768	19.428	25.1918	27.6917	29.956	29.6724	28.4593	29.7098	29.4601	31.1725	28.6184	31.1348	32.8928	37.0358	30.3113	34.4328	28.1957	33.9869	15.8618	17.1848	20.6964	12.4637	13.9107	13.3999	12.684	14.7489	12.1661	11.6245	11.6982	18.6094	16.1059	16.3829	23.3256	21.0242	21.2525	20.0765	21.8349	16.8969	22.7484	20.5362
694	30.9189	31.8007	33.2126	31.8033	34.6721	19.6662	20.644	20.1758	18.6152	19.2001	19.4323	25.2389	27.6712	29.9815	29.7741	28.5379	29.7342	29.4154	31.0692	28.5764	31.0782	32.8405	37.1323	30.2979	34.4971	28.2239	34.1044	15.8763	17.2328	20.7628	12.4592	13.8961	13.4424	12.725	14.7862	12.1348	11.6362	11.6487	18.6569	16.0752	16.4188	23.3598	20.9684	21.2603	19.9289	21.8255	16.7921	22.6819	20.5878
695	30.9475	31.7477	33.1017	31.8777	34.6824	19.5708	20.5889	20.1222	18.5188	19.1406	19.3666	25.1789	27.6235	29.9462	29.7865	28.6092	29.6651	29.3838	31.0732	28.4838	30.9592	32.7653	37.2141	30.4028	34.4506	28.2377	34.1414	15.8236	17.1959	20.7915	12.4674	13.8819	13.4779	12.6471	14.7619	12.0142	11.555	11.5474	18.6061	16.0549	16.3312	23.2805	20.948	21.2623	19.903	21.7678	16.7539	22.8288	20.6062
696	30.9557	31.7011	33.1687	32.0019	34.7537	19.6379	20.6462	20.1257	18.5216	19.1488	19.4078	25.2358	27.7333	30.0275	29.8745	28.6608	29.703	29.4231	31.0339	28.5487	30.8074	32.7326	37.3251	30.4705	34.4579	28.3069	34.1011	15.81	17.2553	20.8528	12.5114	13.8697	13.5317	12.6999	14.8652	12.0576	11.5808	11.6205	18.6286	16.1455	16.383	23.3396	20.941	21.212	19.9019	21.8	16.8005	22.8742	20.751
697	30.8586	31.6571	33.1875	31.8939	34.6595	19.6651	20.6932	20.0689	18.5429	19.1655	19.3948	25.2343	27.8092	30.0844	29.8687	28.6472	29.737	29.4245	30.9249	28.5276	30.7737	32.7026	37.3425	30.4129	34.4594	28.2777	34.1727	15.8454	17.2962	20.8476	12.4836	13.8605	13.462	12.6818	14.8457	12.0285	11.6127	11.7032	18.6945	16.2211	16.477	23.3329	20.938	21.1777	19.8167	21.7238	16.7969	22.8169	20.8642
698	30.9039	31.6457	33.2051	31.7973	34.6068	19.6486	20.7678	20.0608	18.6355	19.2464	19.3758	25.2996	27.945	30.1335	29.986	28.6844	29.8765	29.4592	30.865	28.4556	30.7298	32.6977	37.3463	30.451	34.5484	28.2443	34.1586	15.9311	17.3469	20.8251	12.4298	13.9538	13.5547	12.7691	14.9217	12.1726	11.7086	11.7421	18.8137	16.3026	16.5329	23.3957	20.8878	21.1965	19.8694	21.7663	16.8266	22.7964	20.9113
699	31.0932	31.9091	33.4009	31.9956	34.8575	19.8942	20.9412	20.2551	18.8185	19.4372	19.6165	25.6016	28.2166	30.3815	30.2843	28.9377	30.1569	29.4676	30.9661	28.5576	30.781	32.7083	37.2484	30.5164	34.4683	28.2711	34.1228	16.1208	17.5965	20.9574	12.6066	14.1648	13.7998	13.0024	15.1094	12.4126	11.9394	11.9785	19.035	16.5	16.8048	23.6595	20.9208	21.3344	20.0035	21.8686	16.992	22.8664	21.0238
700	31.1625	32.0244	33.5163	32.1777	34.9026	20.0625	21.0837	20.4017	18.9045	19.5377	19.7716	25.7341	28.401	30.4867	30.3608	29.0548	30.3696	29.4813	30.9793	28.6202	30.7619	32.6788	37.1761	30.5443	34.4563	28.236	34.1277	16.191	17.6773	21.0985	12.7214	14.2968	13.8631	13.0776	15.2053	12.4915	12.031	12.0613	19.0412	16.5913	16.9873	23.7973	20.9038	21.2734	19.9797	21.8025	17.0218	22.9022	21.0401
701	31.1736	32.0277	33.6075	32.1743	35.0598	20.0659	21.1719	20.4659	19.0147	19.5168	19.8093	25.7808	28.459	30.56	30.5118	29.0987	30.4651	29.555	31.0182	28.5776	30.8649	32.7973	37.1053	30.5141	34.3832	28.0987	34.1269	16.2605	17.631	21.163	12.7546	14.3777	13.9822	13.1007	15.2352	12.5116	12.0426	12.1767	19.0597	16.6817	17.0701	23.8122	20.9305	21.3571	20.033	21.8315	16.9865	22.9753	20.959
702	31.1987	32.0524	33.7084	32.2586	34.9655	20.0988	21.2613	20.5178	19.104	19.6232	19.9073	25.8378	28.5054	30.697	30.5125	29.044	30.474	29.5308	30.9543	28.4314	30.6883	32.802	37.2482	30.5888	34.5049	28.1653	34.221	16.3107	17.6786	21.2019	12.8029	14.477	14.1449	13.2363	15.3485	12.6394	12.1447	12.3104	19.2159	16.7587	17.0584	23.8916	20.9404	21.372	19.9831	21.8609	16.9421	23.0087	21.0264
703	31.2113	32.1311	33.7017	32.2254	34.9497	20.1872	21.316	20.5895	19.1502	19.7051	19.8911	25.8695	28.5796	30.8226	30.5434	29.1489	30.5868	29.5132	30.7911	28.344	30.5557	32.6167	37.3059	30.5859	34.6329	28.253	34.1833	16.4566	17.7007	21.22	12.8482	14.6147	14.1367	13.3071	15.3542	12.7314	12.278	12.4181	19.2816	16.8916	17.1473	23.8711	20.8736	21.2501	19.8479	21.8581	16.9583	22.882	21.2425
704	31.2295	32.129	33.6442	32.2103	34.9517	20.2422	21.225	20.6126	19.16	19.6795	19.8948	25.909	28.6944	30.775	30.5895	29.1942	30.6771	29.557	30.8309	28.4339	30.7101	32.5658	37.3327	30.5507	34.7222	28.2526	34.1381	16.4286	17.7139	21.245	12.8768	14.638	14.186	13.3745	15.3981	12.7126	12.3925	12.4294	19.2981	16.9925	17.2015	23.883	20.858	21.2087	19.9407	21.7841	17.0776	22.9697	21.3888
705	31.2599	32.1592	33.6628	32.3186	35.1093	20.2868	21.2602	20.6766	19.1952	19.7489	19.9495	26.0491	28.8469	30.9702	30.7715	29.3984	30.8011	29.6162	30.7621	28.6329	30.7011	32.723	37.2997	30.5629	34.6633	28.3261	34.2288	16.3767	17.6882	21.2278	12.9172	14.732	14.2207	13.4892	15.4564	12.8618	12.4172	12.3669	19.4654	17.1299	17.3297	24.1547	20.9357	21.3198	20.0679	21.8167	17.1216	23.0369	21.3597
706	31.3345	32.2966	33.8137	32.353	35.3247	20.4554	21.5378	20.832	19.3292	19.9116	20.0707	26.22	29.0288	31.221	31.0437	29.6422	31.0055	29.6072	30.6597	28.6238	30.6552	32.8128	37.2032	30.5941	34.5487	28.409	34.3986	16.5173	17.8298	21.3723	13.1044	14.8978	14.4169	13.6414	15.6553	13.0678	12.5342	12.6225	19.6296	17.3215	17.609	24.4137	21.02	21.4672	20.1192	21.9416	17.0743	23.0855	21.3657
707	31.0697	32.3716	33.6833	32.2823	35.2819	20.4143	21.5909	20.7765	19.2729	19.8509	20.0102	26.2131	28.9728	31.2298	31.037	29.5757	30.9619	29.5987	30.678	28.6634	30.719	32.8553	37.146	30.6023	34.535	28.4344	34.289	16.5419	17.7961	21.3913	13.0953	14.7657	14.5088	13.4843	15.6956	12.9771	12.5224	12.6678	19.5783	17.2988	17.5797	24.2422	21.0407	21.5184	20.0725	21.9515	16.9777	22.9324	21.3885
708	31.1777	32.4119	33.6684	32.396	35.2467	20.4806	21.6746	20.8182	19.4344	19.9178	20.0946	26.2803	29.0712	31.2058	31.067	29.5092	30.8779	29.4943	30.7177	28.6142	30.8215	32.7923	37.2336	30.729	34.7914	28.6111	34.4379	16.6396	17.8598	21.4551	13.152	14.8354	14.5542	13.5872	15.8157	13.0404	12.7455	12.8083	19.6163	17.2901	17.645	24.1754	21.0678	21.5074	20.1533	21.9018	17.0263	22.9699	21.6137
709	31.214	32.3923	33.6314	32.4506	35.2257	20.5452	21.6837	20.8319	19.5115	20.0382	20.1802	26.3846	29.1435	31.2044	31.2154	29.4731	30.9589	29.4809	30.4589	28.6168	30.6704	32.5903	37.1857	30.7145	34.7878	28.743	34.4687	16.6834	17.8877	21.385	13.1006	14.8974	14.5647	13.7002	15.8565	13.1338	12.7556	12.7621	19.7177	17.3449	17.6984	24.2113	20.9598	21.5118	20.152	21.9261	16.9765	22.9156	21.6828
710	31.164	32.3918	33.6236	32.5191	35.3884	20.6298	21.8346	20.9764	19.5616	20.1487	20.3597	26.4983	29.2526	31.2474	31.2277	29.6147	31.0104	29.7414	30.3391	28.7124	30.7045	32.5786	37.2801	30.797	34.934	28.8712	34.6359	16.8018	17.9073	21.4612	13.233	14.9832	14.7124	13.83	15.9569	13.2259	12.7968	12.8577	19.8192	17.4813	17.8572	24.2162	21.0033	21.6812	20.3302	22.061	17.1551	22.9708	21.7988
711	31.2463	32.4594	33.7357	32.5778	35.3861	20.7293	21.935	21.0429	19.5935	20.2866	20.4066	26.5814	29.3298	31.3928	31.2473	29.7078	31.0431	29.9065	30.5501	28.8198	30.8567	32.5813	37.3239	30.9298	35.0208	28.9088	34.7269	16.9459	17.934	21.6039	13.3675	15.1249	14.7732	13.8943	16.1137	13.2479	12.8468	12.9089	19.8782	17.6559	17.9466	24.2628	21.2276	21.8338	20.4089	22.1097	17.2537	23.0435	21.8719
712	31.3766	32.5129	33.8313	32.7044	35.518	20.8869	22.0025	21.1713	19.7619	20.4599	20.4894	26.641	29.5101	31.5695	31.422	29.7457	31.2517	30.1851	30.824	29.0609	31.0478	32.8142	37.5098	31.1631	35.0967	29.104	34.9158	17.0434	18.0655	21.7303	13.5246	15.3218	15.0118	13.9932	16.3058	13.351	13.0069	13.1082	20.0884	17.8145	18.1313	24.392	21.403	22.1197	20.5603	22.28	17.3977	23.1633	22.1723
713	31.4531	32.5835	33.8712	32.8517	35.6134	20.9827	22.1442	21.2625	19.8353	20.4993	20.6671	26.8003	29.6161	31.7343	31.5654	29.9171	31.433	30.1925	30.8454	29.0075	31.0005	32.9213	37.545	31.3032	35.0699	29.237	35.1079	17.1229	18.168	21.813	13.5668	15.5124	15.0958	14.1773	16.4559	13.6163	13.2355	13.3328	20.1775	18.0085	18.2716	24.4908	21.3044	22.2134	20.5783	22.3336	17.3742	23.1855	22.3655
714	31.7379	32.6484	33.9624	32.8028	35.6926	21.2499	22.3292	21.574	19.9769	20.6519	20.7576	27.0081	29.6563	31.7955	31.8284	30.1554	31.585	30.1572	30.8985	28.8076	30.9481	32.8824	37.7028	31.4276	35.1094	29.3077	35.3602	17.2404	18.2841	21.9452	13.6694	15.6788	15.1515	14.3559	16.5471	13.8031	13.4444	13.4301	20.4021	18.1249	18.5336	24.7211	21.1902	22.1927	20.4964	22.3927	17.4613	23.1994	22.5074
715	31.817	32.6985	33.8965	32.8034	35.6774	21.3877	22.5378	21.6576	20.0842	20.741	20.8568	27.1034	29.7283	31.934	31.9947	30.258	31.7527	30.2425	30.8414	28.8729	31.0277	32.8499	37.7942	31.4506	35.1367	29.3207	35.2741	17.3217	18.3675	22.0308	13.7426	15.6269	15.2181	14.3741	16.5418	13.9069	13.5245	13.5235	20.6047	18.1593	18.6055	24.8326	21.323	22.1591	20.5838	22.4129	17.645	23.2402	22.4124
716	31.8162	32.7655	33.9935	32.8367	35.7487	21.4743	22.7168	21.7588	20.1529	20.8255	21.0311	27.2198	29.9505	32.0953	32.0718	30.3443	31.9228	30.2755	30.8258	28.8655	30.9447	32.8378	37.7929	31.4258	35.1754	29.2906	35.1464	17.406	18.3864	22.0619	13.8944	15.587	15.24	14.448	16.628	14.0117	13.5467	13.6326	20.6618	18.2877	18.6798	24.8493	21.5021	22.1553	20.5781	22.4077	17.7086	23.2117	22.4577
717	31.8552	32.936	34.1837	33.0034	35.9557	21.6435	22.8126	21.891	20.2783	20.9708	21.2654	27.4667	30.1022	32.2605	32.1716	30.4786	32.0293	30.0382	30.6955	28.8263	30.8287	32.8602	37.8083	31.546	35.1936	29.3161	35.2218	17.5662	18.406	22.261	14.0112	15.7519	15.434	14.6153	16.8028	14.162	13.6882	13.7501	20.7623	18.5839	18.8407	25.0258	21.4841	22.1491	20.6453	22.3891	17.5552	23.0662	22.5617
718	32.0689	33.2124	34.3056	33.2174	36.2678	21.9044	23.009	22.1755	20.4563	21.1869	21.4306	27.609	30.267	32.3616	32.4778	30.6027	32.1794	30.0482	30.7771	28.8809	31.0053	32.7893	37.9126	31.7227	35.3614	29.5395	35.3394	17.7056	18.5969	22.5278	14.1733	16.046	15.6624	14.9127	17.1635	14.3317	13.9451	14.0754	20.8828	18.886	19.0612	25.2651	21.5026	22.2859	20.7103	22.329	17.4696	23.1396	22.7887
719	32.1505	33.3288	34.3451	33.2429	36.3896	21.944	23.0267	22.2536	20.5663	21.32	21.5611	27.7258	30.3675	32.447	32.589	30.6681	32.1214	30.1319	30.7914	28.9115	31.2121	32.8318	38.1447	31.9408	35.3536	29.6151	35.4152	17.6402	18.7289	22.5491	14.137	16.0413	15.7557	14.9471	17.2307	14.3296	13.9781	14.1138	20.9759	18.9057	19.1507	25.2775	21.4642	22.4152	20.6622	22.3935	17.4622	23.2307	22.8528
720	32.3108	33.5983	34.5163	33.3716	36.5077	22.1488	23.2192	22.4873	20.9362	21.6851	21.8231	27.9934	30.5624	32.7357	32.7062	30.9378	32.3233	30.5192	30.9638	29.1092	31.4561	33.0752	38.2959	32.0485	35.5078	29.6588	35.4951	17.8069	18.8851	22.7385	14.245	16.1904	15.9198	15.0789	17.3218	14.5795	14.1601	14.3818	21.3119	18.9995	19.4093	25.3404	21.6596	22.6548	20.843	22.6525	17.7519	23.4049	23.0026
721	32.6388	33.8765	34.8784	33.6555	36.8054	22.5007	23.6007	22.8082	21.2255	22.0285	22.2281	28.4145	30.9434	33.1202	33.0231	31.3911	32.8154	30.691	31.0667	29.1201	31.5746	33.1113	38.4784	32.1833	35.7894	29.8678	35.6635	18.1341	19.0389	22.9096	14.5357	16.5437	16.1457	15.3252	17.6449	14.9005	14.4847	14.6948	21.6823	19.4369	19.7247	25.5964	21.9495	22.7512	20.9437	22.6696	17.8264	23.5623	23.1194
722	32.8594	33.9956	35.0579	33.9015	37.0632	22.7768	23.9932	23.1046	21.4369	22.1721	22.4954	28.6494	31.2423	33.3722	33.233	31.5631	33.2365	30.8664	31.2304	29.1367	31.7444	33.3796	38.5398	32.2966	35.7609	29.7937	35.6555	18.1585	19.0911	23.0195	14.7101	16.7357	16.3801	15.5499	17.915	15.0097	14.7507	14.8942	22.0101	19.8225	20.0178	25.8402	22.0071	22.7484	21.1248	22.7527	17.8121	23.5921	23.1368
723	33.2027	34.3539	35.1742	34.2738	37.4617	23.0775	24.3189	23.6448	21.9029	22.4942	22.6988	28.9633	31.6189	33.7884	33.8138	31.7472	33.479	31.203	31.5171	29.4801	31.8978	33.6171	38.7961	32.4272	35.8788	29.8661	35.7734	18.4255	19.3744	23.2202	14.9639	16.9869	16.518	15.9552	18.124	15.1969	15.0078	15.1834	22.4437	20.0672	20.2231	26.0553	22.131	22.9453	21.3224	22.9652	17.9824	23.5131	23.2911
724	33.3591	34.5731	35.4139	34.4776	37.593	23.2677	24.5926	23.9228	22.0838	22.8238	23.014	29.2351	31.9582	33.9844	34.1683	31.9504	33.6395	31.3243	31.6889	29.7024	32.1034	33.5844	39.1009	32.6521	36.0912	30.1875	35.9729	18.5307	19.6266	23.3743	15.0156	17.1747	16.777	16.219	18.2858	15.4066	15.1804	15.2909	22.5604	20.202	20.3489	26.2509	22.122	22.9861	21.3801	22.8907	17.9915	23.5329	23.54
725	33.478	34.8659	35.7812	34.7525	37.9162	23.5798	24.8997	24.0919	22.4154	23.2764	23.4956	29.6013	32.3843	34.2746	34.5231	32.383	33.9975	31.2373	31.7401	29.6164	32.2491	33.5196	39.3225	32.9817	36.2426	30.2852	36.3243	18.7321	19.8158	23.5447	15.2168	17.4244	17.02	16.364	18.6116	15.7617	15.425	15.6577	22.7074	20.6053	20.6881	26.5707	22.2157	23.0104	21.2627	22.7194	18.134	23.7377	23.7992
726	33.6397	34.9627	35.924	34.8241	38.1238	23.6849	24.9116	24.2154	22.5775	23.4473	23.5276	29.8025	32.4033	34.4294	34.5829	32.5144	34.2781	31.3405	31.7204	29.8928	32.4681	33.8827	39.6517	33.05	36.2515	30.42	36.4936	18.8449	19.8903	23.6194	15.2723	17.5436	17.1488	16.3624	18.85	15.802	15.5204	15.8328	22.8063	20.7823	20.9331	26.4914	22.4291	23.091	21.415	22.811	18.4245	23.8505	23.8063
727	33.6967	34.8132	35.9094	34.7712	38.0739	23.6846	24.9287	24.2207	22.6812	23.3654	23.5152	29.8103	32.3174	34.3607	34.516	32.2353	34.0612	31.4371	31.6593	29.9875	32.4852	34.1174	39.7483	33.0582	36.285	30.6583	36.5714	18.7389	19.7315	23.6391	15.3003	17.5285	16.9865	16.3758	18.6426	15.7972	15.4957	15.9095	22.7797	20.7458	20.8427	26.4148	22.6833	23.156	21.5561	22.9334	18.4054	23.8454	23.9836
728	33.8254	35.0877	36.0999	34.8082	38.1493	23.8136	25.1279	24.2962	22.8386	23.3769	23.6826	29.9766	32.4758	34.681	34.7141	32.3778	34.2123	31.5638	31.9251	30.2032	32.5302	34.1959	40.1727	33.4046	36.4699	30.8946	36.8985	18.7948	19.7464	23.7532	15.444	17.6056	16.9176	16.472	18.761	15.8967	15.7416	15.9102	22.9644	20.922	21.0448	26.585	22.749	23.2546	21.7985	23.0545	18.6677	23.8718	24.1483
729	34.0574	35.5461	36.4268	35.0589	38.276	24.1294	25.413	24.5075	23.1292	23.7411	24.0861	30.3346	32.9144	35.0276	35.0994	32.7329	34.6588	31.9067	32.2115	30.4256	32.7198	34.1704	40.4962	33.8711	36.9481	31.2297	37.129	19.1397	20.0076	23.959	15.6019	17.801	17.184	16.6303	19.1161	15.9358	15.9823	16.1699	23.2609	21.317	21.4625	26.8737	22.8428	23.4615	22.1257	22.9364	18.9144	23.8484	24.3767
730	34.4035	35.7031	36.7461	35.3456	38.3889	24.463	25.6458	24.9078	23.3051	24.2343	24.3267	30.6158	33.275	35.2256	35.2881	33.1607	34.9609	31.9131	32.2507	30.4908	32.902	34.3425	40.5819	33.8432	37.0122	31.197	37.0956	19.3158	20.2153	23.9761	15.7952	17.923	17.5604	17.047	19.3673	16.2253	16.2649	16.3055	23.4007	21.4224	21.673	27.0891	23.0627	23.7623	22.1921	22.9206	18.8299	23.7755	24.5026
731	34.3335	35.7002	36.6906	35.2869	38.2287	24.5512	25.648	24.8602	23.3204	24.1621	24.2625	30.5857	33.1871	35.1448	35.3879	33.2398	34.8464	31.8869	32.285	30.4801	33.0004	34.5582	40.6173	33.8925	36.9686	31.252	37.2132	19.3454	20.2552	23.7451	15.8317	17.9034	17.5733	17.0664	19.3401	16.3401	16.3307	16.2752	23.3924	21.3487	21.6566	26.9665	23.0425	23.6567	22.1565	22.9214	18.7026	23.9185	24.5376
732	34.348	35.7399	36.6354	35.2807	38.1108	24.4252	25.7064	24.9143	23.3595	24.1708	24.3698	30.6124	33.0911	35.1758	35.2919	33.2882	34.7903	32.0535	32.7138	30.5642	32.9145	34.6064	40.548	33.948	36.9079	31.4007	37.1931	19.3971	20.1819	23.7828	15.8611	18.0506	17.6177	17.0609	19.4477	16.4441	16.3103	16.3953	23.4375	21.3174	21.6178	26.8506	23.0387	23.6193	22.2295	23.1094	18.8436	24.2196	24.4848
733	34.2991	35.581	36.655	35.0927	37.9254	24.2275	25.8458	24.9936	23.3742	24.1259	24.3195	30.5975	32.9917	35.2253	35.214	33.0754	34.7721	32.0578	32.9173	30.6501	32.9906	34.547	40.4551	33.8187	36.9265	31.4693	37.0308	19.4812	20.1105	23.7373	15.9057	18.102	17.5369	17.052	19.3905	16.5069	16.3353	16.5347	23.341	21.2733	21.5825	26.8038	23.148	23.8852	22.3194	23.3237	18.8529	24.1314	24.3716
734	34.3965	35.5084	36.9131	35.0226	38.0418	24.3675	25.9034	24.9579	23.6401	24.1584	24.4384	30.8323	32.9899	35.4106	35.3408	33.1023	34.9922	32.0578	32.8483	30.7834	33.1108	34.7208	40.6372	34.0288	37.0646	31.6266	37.1654	19.5771	20.1024	23.7707	16.009	18.1699	17.5968	17.2001	19.5506	16.5906	16.4854	16.6269	23.5112	21.5987	21.5378	26.8231	23.2253	24.0067	22.1945	23.3538	19.1103	24.2048	24.5713
735	34.2832	35.5245	36.9168	34.96	38.0939	24.3545	25.8553	24.9211	23.6605	24.1443	24.3021	30.8303	33.1615	35.3219	35.2781	33.1577	35.1396	32.0771	32.7533	30.7693	33.1283	34.8076	40.743	33.9596	37.0846	31.5196	37.2776	19.4916	20.0209	23.7071	16.0157	18.1305	17.4843	17.1469	19.5107	16.5181	16.4014	16.5813	23.518	21.7427	21.543	26.7167	23.222	23.9583	22.1001	23.2553	19.0124	24.169	24.5809
736	34.4536	35.5722	36.9525	35.0103	38.1588	24.5486	26.0103	24.9369	23.7181	24.3035	24.4226	30.8428	33.1618	35.2319	35.1457	33.3258	35.1343	32.288	32.8536	30.9457	33.1917	34.7454	40.8233	34.1225	37.006	31.6842	37.4886	19.4718	20.173	23.8091	16.0379	18.0719	17.6091	17.1924	19.5694	16.6794	16.4283	16.4705	23.6011	21.7704	21.7135	26.7766	23.313	23.8906	22.0736	23.2253	18.8213	24.1088	24.7494
737	34.802	36.0075	37.4207	35.5401	38.4539	24.7765	26.5039	25.5094	24.1363	24.764	25.0185	31.2413	33.7568	35.7394	35.519	33.9756	35.5928	32.3154	32.8095	31.0584	33.2693	34.8689	41.1013	34.5774	37.1627	31.9608	37.7225	19.7338	20.4243	24.1447	16.3753	18.2936	17.9415	17.5875	19.9405	17.0914	16.7833	16.9535	23.9452	22.0102	22.2133	27.1877	23.5012	23.9635	22.2152	23.3755	18.9352	24.0455	25.0546
738	34.9358	36.3455	37.65	35.8394	38.5848	25.1046	26.6051	25.6649	24.2388	24.9927	25.1288	31.4824	34.0325	36.1268	35.9554	34.1225	36.131	32.1609	33.0244	31.185	33.1516	34.9029	41.4257	34.8557	37.4074	32.1745	38.0371	19.849	20.3687	24.2469	16.3097	18.4162	18.1342	17.8358	20.1841	17.2595	16.9402	17.2101	24.2337	22.2905	22.4444	27.5203	23.5241	24.0177	22.375	23.3544	19.1057	24.1466	25.1958
739	35.1525	36.4557	37.7916	35.7377	38.6995	25.3165	26.6144	25.7531	24.4007	25.134	25.3336	31.8751	34.1471	36.2152	36.1615	34.2359	36.2739	32.1281	33.0385	31.1595	33.1308	35.0012	41.5524	34.914	37.6748	32.3479	38.1778	19.9874	20.4075	24.3777	16.3124	18.701	18.3631	18.016	20.2114	17.2785	17.0341	17.2631	24.5164	22.7288	22.6087	27.7072	23.5002	23.9809	22.4747	23.4506	19.027	24.3293	25.1849
740	35.4379	36.7755	38.0494	36.0227	38.8644	25.5567	26.8816	26.042	24.6546	25.3162	25.6663	32.2869	34.5521	36.7286	36.6014	34.6168	36.3279	32.2497	33.176	31.1242	33.3227	35.1747	41.5791	34.9738	37.6366	32.4556	38.2562	20.146	20.5624	24.496	16.4917	18.8265	18.6301	18.3659	20.485	17.5526	17.2958	17.4462	24.7503	23.0631	22.8111	27.8908	23.5919	24.0441	22.522	23.485	19.008	24.3227	25.3227
741	35.6763	36.9926	38.3309	36.363	39.2033	25.9456	27.3376	26.6639	25.0959	25.744	25.9358	32.7395	35.0142	37.3336	37.1341	35.1487	36.6864	32.411	33.4687	31.3191	33.5993	35.3263	41.5119	34.9339	37.5833	32.4296	38.2676	20.5102	20.9607	24.7372	16.9243	19.0637	18.9911	18.805	20.9154	18.1188	17.7739	18.0323	25.1425	23.3658	23.2296	28.2937	23.6224	24.1931	22.5925	23.4462	19.3483	24.4479	25.3425
742	35.9393	37.2095	38.5412	36.5354	39.348	26.1447	27.5286	26.8854	25.3336	25.9663	26.0265	33.0039	35.1976	37.3978	37.3612	35.3691	36.9585	32.1772	33.4281	31.3565	33.4905	35.2759	41.6612	34.912	37.4629	32.1712	38.3477	20.6798	21.2034	24.6991	17.0713	19.2411	19.2346	18.9092	20.9856	18.3065	17.9766	18.2747	25.1831	23.4701	23.5969	28.6303	23.6849	24.268	22.7085	23.5982	19.5124	24.4441	25.3284
743	36.0787	37.4228	38.6477	36.5939	39.4601	26.5941	27.9217	27.1475	25.6063	26.0525	26.225	33.151	35.4834	37.5188	37.6911	35.3799	36.9991	32.2089	33.3708	31.4332	33.4953	35.6181	41.8203	35.0758	37.5494	32.4256	38.4779	20.8997	21.3999	24.7128	17.4874	19.4856	19.5515	18.9838	21.2896	18.5622	18.1821	18.5071	25.3258	23.7706	23.8544	28.8746	23.7149	24.3048	22.8779	23.6708	19.5224	24.4094	25.5419
744	36.0726	37.5676	38.7122	36.7751	39.5931	26.8588	28.1922	27.3352	25.8349	26.2423	26.6064	33.2239	35.603	37.818	37.7252	35.6447	37.0731	32.4033	33.3712	31.4208	33.5448	35.8804	41.8335	35.2469	37.7967	32.7052	38.6141	20.8822	21.6197	24.8876	17.6925	19.6543	19.6737	19.1736	21.5183	18.8137	18.3963	18.9975	25.5968	23.8843	23.9481	29.0473	23.7574	24.3597	22.9812	23.8571	19.5075	24.4498	25.6347
745	35.9324	37.6441	38.8074	36.8704	39.7864	26.9573	28.2038	27.273	25.866	26.2967	26.7865	33.3192	35.6969	37.9186	37.6702	35.8576	37.321	32.5232	33.2678	31.4492	33.4982	35.874	41.9865	35.5097	38.0562	32.791	38.6452	20.9945	21.7669	25.0091	17.8257	19.7498	19.7452	19.3467	21.5489	18.8584	18.452	19.1031	25.9346	24.0945	24.2312	29.2179	23.9314	24.2777	22.9611	23.8914	19.4279	24.3032	25.7932
746	36.0056	37.3165	38.6692	36.5836	39.4508	26.7266	28.0395	27.1551	25.7726	26.3499	26.4696	33.1837	35.6824	37.5984	37.5865	35.7143	37.3556	32.1883	33.3759	31.3686	33.3724	35.6056	42.0876	35.3036	37.9642	32.6354	38.627	21.0649	21.5432	24.9513	17.691	19.6262	19.6215	19.305	21.4543	18.6339	18.2942	18.8455	25.8742	24.0721	24.1985	28.9812	23.9527	24.1578	22.7598	23.7504	19.1855	23.99	25.6244
747	35.9295	37.1539	38.4955	36.5196	39.2115	26.5036	27.9103	27.1873	25.7434	26.1237	26.581	33.0523	35.5487	37.6253	37.48	35.6887	37.1242	32.2219	33.4787	31.4466	33.2442	35.7362	42.1031	35.247	38.0032	32.5868	38.7952	20.8117	21.2708	24.9794	17.434	19.5818	19.6099	19.1847	21.339	18.4712	18.2582	18.7388	25.58	23.9362	23.8485	28.9039	24.5271	24.3224	22.8896	23.7599	19.4067	24.3955	25.8147
748	36.1435	37.3083	38.4931	36.8554	39.4655	26.6356	28.1936	27.4293	25.7411	26.245	26.7128	33.2248	35.6134	38.0549	37.6417	35.9939	37.4158	32.3119	33.4567	31.481	33.2706	35.6805	42.0744	35.3505	38.322	32.6925	38.9739	20.7873	21.3615	25.1545	17.474	19.6756	19.8266	19.4135	21.4095	18.6834	18.323	19.0308	25.5615	24.0049	24.0841	28.9012	24.3386	24.0757	22.9381	23.6345	19.4265	24.5714	25.9272
749	36.34	37.6089	39.1043	37.064	39.881	27.13	28.611	27.8017	26.114	26.6289	27.1524	33.6454	36.1204	38.5933	38.1093	36.1427	37.9034	32.3743	33.6372	31.8582	33.5048	36.0352	42.4315	35.6588	38.5893	32.8367	39.1239	21.2017	21.7826	25.4185	17.9858	19.9286	20.1227	19.8696	21.962	19.1808	18.7665	19.4693	26.0252	24.5638	24.5183	29.285	24.2069	24.2041	22.7939	23.8179	19.5849	24.6616	26.1748
750	36.4685	37.8125	39.4427	37.2415	40.0964	27.4361	28.7016	28.0187	26.3127	26.7144	27.3176	34.0899	36.7467	38.8637	38.4954	36.4322	38.2857	32.2978	33.7043	31.7926	33.6032	35.8979	42.6001	35.9372	38.8334	33.0406	39.3373	21.5358	21.7909	25.5575	18.1554	20.0431	20.2611	19.9863	22.1556	19.4388	19.0167	19.6064	26.5351	24.8511	24.6994	29.6786	24.4296	24.5371	22.7818	23.9624	19.8158	24.6738	26.3638
[truncated: 55 more columns]
