# Supplementary material for: Molecular basis of wax-based color change and UV reflection in dragonflies
Source: eLife. 2019 Jan 15;8:e43045. doi: 10.7554/eLife.43045 (PMC6353593; doi:10.7554/eLife.43045)
Supplement: Figure 2—source data 5. [file elife-43045-fig2-data5.xlsx]

## Sheet: OalbistylumAged-OCEAN
	Male	Male	Male	Male	Male	Male	Female	Female	Female	Female	Female	Female	Female	Female	Female	Female	Female	Female
wavelength	M1D5	M2D5	M3D5	M1V5	M2V5	M3V5	F1D5	F2D5	F3D5	F4D5	F5D5	F6D5	F1V5	F2V5	F3V5	F4V5	F5V5	F6V5	male D5	male V5	female D5	female V5	male D5SD	male V5SD	female D5SD	femalseV5SD
300	47.089	47.397	69.344	25.364	19.221	37.296	38.314	16.462	7.947	9.495	9.969	15.704	28.753	36.774	15.008	15.946	14.612	23.776	54.61	27.2937	16.3152	22.4782	12.7609	9.19071	11.3239	9.00864
301	46.589	46.291	68.763	25.329	19.569	37.187	38.413	16.399	8.023	9.309	9.807	15.81	28.796	36.546	15.303	15.732	14.638	24.08	53.881	27.3617	16.2935	22.5158	12.8891	8.98317	11.391	8.93127
302	47.554	46.342	69.233	25.65	18.913	37.258	37.987	16.451	7.967	9.495	10.007	15.566	28.72	36.442	15.039	16.289	14.043	23.983	54.3763	27.2737	16.2455	22.4193	12.8805	9.27965	11.1912	8.95535
303	46.952	46.025	69.15	25.308	19.19	36.66	38.029	16.137	7.868	9.612	9.929	15.945	28.57	36.279	15.189	16.239	14.724	23.929	54.0423	27.0527	16.2533	22.4883	13.0918	8.86471	11.2134	8.73915
304	46.926	46.564	68.908	25.407	19.473	36.678	37.955	16.146	7.804	9.833	10.115	15.574	28.654	36.37	15.061	16.049	14.444	24.469	54.1327	27.186	16.2378	22.5078	12.7971	8.73937	11.151	8.8992
305	46.198	46.243	68.594	24.913	18.634	36.862	37.922	16.125	7.812	9.491	9.772	16.186	28.521	36.158	14.692	16.04	13.883	23.857	53.6783	26.803	16.218	22.1918	12.9174	9.25981	11.2119	8.9556
306	45.83	45.616	68.777	25.55	19.196	36.575	37.654	15.96	7.808	9.367	9.784	15.935	28.419	36.175	14.674	16.375	14.141	24.41	53.4077	27.107	16.0847	22.3657	13.3107	8.7935	11.123	8.87936
307	45.791	45.895	68.346	25.012	18.496	36.221	37.621	16.011	8.018	9.813	9.179	15.106	28.411	35.758	14.934	15.348	14.045	23.397	53.344	26.5763	15.958	21.9822	12.9922	8.96545	11.1065	8.82941
308	47.024	47.118	68.935	25.288	19.172	36.392	37.572	16.017	7.875	9.598	10.162	15.443	28.277	35.913	15.028	15.726	14.35	23.489	54.359	26.9507	16.1112	22.1305	12.6233	8.72957	11.0152	8.73592
309	46.728	45.427	68.743	25.106	18.797	36.29	37.55	15.681	7.75	9.099	9.826	15.877	28.361	35.827	14.436	15.748	14.177	23.745	53.6327	26.731	15.9638	22.049	13.1021	8.85899	11.1204	8.85641
310	46.617	45.888	68.218	24.509	19.014	36.254	37.376	15.726	7.614	8.789	9.719	15.531	28.286	35.466	14.583	15.555	14.343	23.32	53.5743	26.5923	15.7925	21.9255	12.687	8.80679	11.1242	8.69178
311	45.59	44.689	68.083	24.649	18.987	35.697	37.456	15.728	7.534	9.593	10.049	15.442	28.317	35.678	14.407	15.664	14.319	23.444	52.7873	26.4443	15.967	21.9715	13.2541	8.49844	11.0352	8.78486
312	45.812	45.247	67.895	24.773	18.542	35.794	37.109	15.429	7.532	9.165	9.954	15.667	28.116	35.481	14.712	15.644	13.806	23.383	52.9847	26.3697	15.8093	21.857	12.9158	8.73613	10.9616	8.736
313	46.6	44.291	68.003	24.853	18.347	35.719	37.117	15.714	7.841	9.203	10.246	15.932	28.174	35.3	14.428	15.92	13.951	23.388	52.9647	26.3063	16.0088	21.8602	13.0746	8.77672	10.8802	8.6707
314	46.046	44.351	68.068	24.185	18.376	35.668	37.153	15.394	7.961	9.069	9.733	15.175	28.045	35.398	14.615	15.815	14.191	23.616	52.8217	26.0763	15.7475	21.9467	13.2309	8.79978	10.9549	8.63036
315	47.272	45.005	67.775	25.039	18.659	35.546	37.01	15.465	7.275	9.186	9.941	15.398	28.004	35.258	14.349	15.769	14.09	24.08	53.3507	26.4147	15.7125	21.925	12.5432	8.52714	10.9621	8.67233
316	45.664	44.33	67.666	24.932	18.808	35.481	37.062	15.664	7.752	8.649	9.699	15.257	28.106	35.12	14.42	15.493	14.029	22.962	52.5533	26.407	15.6805	21.6883	13.1049	8.4338	11.0039	8.63822
317	46.477	45.01	67.886	23.954	18.469	35.463	36.847	15.556	7.492	8.978	9.694	15.417	27.977	35.106	14.332	15.631	13.855	23.501	53.1243	25.962	15.664	21.7337	12.805	8.67312	10.9171	8.66051
318	45.634	44.455	67.337	24.393	18.186	35.172	36.711	15.341	7.39	9.177	9.538	14.794	27.922	34.823	14.289	14.879	13.808	23.599	52.4753	25.917	15.4918	21.5533	12.8841	8.59494	10.8787	8.69639
319	45.415	44.862	67.298	24.779	18.633	35.155	36.603	15.18	7.352	9.587	10.214	14.995	27.843	35.036	14.249	15.647	13.754	23.292	52.525	26.189	15.6552	21.6368	12.7968	8.35076	10.7224	8.64165
320	45.783	44.538	67.191	24.525	18.594	34.818	36.466	15.365	6.89	9.346	9.926	15.277	27.798	34.751	14.069	15.894	14.501	23.453	52.504	25.979	15.545	21.7443	12.7345	8.20915	10.7954	8.41835
321	44.076	43.008	67.019	23.733	18.666	34.727	36.374	15.156	7.269	8.967	9.848	14.866	27.722	34.811	14.042	15.412	13.835	23.646	51.3677	25.7087	15.4133	21.578	13.565	8.21075	10.7571	8.62441
322	44.462	43.591	66.658	23.599	18.079	34.707	36.434	15.118	7.457	8.856	10.07	14.547	27.592	34.407	13.909	14.988	13.418	22.556	51.5703	25.4617	15.4137	21.145	13.0736	8.46905	10.7476	8.59547
323	45.25	42.904	66.448	23.97	18.25	34.438	36.373	15.074	7.161	8.916	10.082	14.838	27.689	34.414	13.998	15.485	13.405	23.069	51.534	25.5527	15.4073	21.3433	12.9691	8.20923	10.7563	8.54844
324	44.992	43.203	66.921	24.468	18.029	34.465	36.228	14.978	7.226	9.374	10.079	15.043	27.626	34.64	14.164	15.421	13.784	23.636	51.7053	25.654	15.488	21.5452	13.2075	8.28194	10.6349	8.54454
325	44.884	43.224	66.795	23.721	17.756	34.682	36.226	15.011	7.161	9.022	9.758	14.837	27.635	34.471	13.825	14.837	13.626	22.585	51.6343	25.3863	15.3358	21.1632	13.1557	8.58501	10.7197	8.62186
326	44.866	42.331	66.799	23.357	18.161	34.406	36.027	15.102	7.274	8.456	9.643	14.489	27.506	34.508	14.105	14.389	13.053	23.133	51.332	25.308	15.1652	21.1157	13.4547	8.29637	10.7094	8.75973
327	45.306	44.128	66.624	23.574	18.473	34.412	36.083	14.768	7.738	9.074	10.051	14.739	27.526	34.328	14.479	15.729	14.137	23.725	52.0193	25.4863	15.4088	21.654	12.6617	8.13976	10.5447	8.27637
328	43.729	43.225	66.138	23.582	17.206	34.215	35.886	14.787	7.085	8.652	9.858	14.671	27.526	33.978	13.814	15.409	13.514	23.151	51.0307	25.001	15.1565	21.232	13.0858	8.59283	10.6359	8.41735
329	44.516	42.724	66.784	24.138	18.001	34.302	35.971	14.868	7.331	8.49	10.357	14.577	27.38	34.239	13.961	15.113	13.283	23.08	51.3413	25.4803	15.2657	21.176	13.4037	8.23299	10.6048	8.5308
330	45.021	43.44	66.012	24.24	18.273	33.982	35.732	14.507	7.093	9.575	10.156	14.875	27.369	34.304	13.641	15.369	13.516	22.968	51.491	25.4983	15.323	21.1945	12.6004	7.92974	10.439	8.5215
331	44.166	42.825	65.83	24.119	17.925	33.973	35.704	14.567	6.908	8.751	9.434	14.883	27.281	34.131	13.763	14.585	13.046	22.344	50.9403	25.339	15.0412	20.8583	12.9123	8.09326	10.6241	8.60642
332	43.642	42.19	65.763	23.992	17.86	34.031	35.759	14.57	7.031	9.174	9.762	14.568	27.245	34.079	13.711	15.144	13.529	22.966	50.5317	25.2943	15.144	21.1123	13.2107	8.16378	10.5458	8.45089
333	44.677	43.153	66.214	23.577	17.607	34.226	35.489	14.587	6.984	8.88	9.553	14.533	27.31	33.897	13.541	14.685	13.364	22.561	51.348	25.1367	15.0043	20.893	12.8969	8.41856	10.503	8.51283
334	43.325	42.579	65.998	23.08	17.183	33.842	35.473	14.651	7.149	8.857	9.338	14.564	27.22	34.014	13.73	14.805	13.489	22.143	50.634	24.7017	15.0053	20.9002	13.3108	8.44707	10.4966	8.4492
335	43.175	41.431	65.694	22.855	17.596	34.202	35.472	14.4	7.103	8.696	9.702	14.604	27.231	33.862	13.772	15.241	14.171	22.32	50.1	24.8843	14.9962	21.0995	13.5329	8.48696	10.4861	8.22174
336	43.353	42.131	65.241	23.099	16.87	33.634	35.405	14.33	6.97	8.596	9.368	14.155	27.145	33.59	14.093	14.271	13.164	22.288	50.2417	24.5343	14.804	20.7585	13.0042	8.47367	10.531	8.39008
337	43.044	41.944	66.086	22.946	17.031	33.565	35.367	14.401	7.229	8.244	9.771	14.417	27.09	33.671	13.893	14.715	13.731	21.884	50.358	24.514	14.9048	20.8307	13.6319	8.37778	10.477	8.25955
338	43.149	42.947	65.512	22.655	17.555	33.457	35.286	14.184	6.81	8.294	9.502	14.213	26.987	33.581	13.224	14.334	13.515	22.306	50.536	24.5557	14.7148	20.6578	12.97	8.11959	10.5318	8.43867
339	45.633	43.091	65.347	23.469	17.664	33.261	35.041	14.205	6.984	8.513	9.888	14.276	26.81	33.326	13.15	14.317	13.109	22.761	51.357	24.798	14.8178	20.5788	12.1822	7.88297	10.3447	8.44128
340	42.879	42.153	65.332	22.647	17.342	33.636	34.921	14.364	6.76	8.81	9.048	13.711	26.973	33.464	13.424	14.214	12.846	22.047	50.1213	24.5417	14.6023	20.4947	13.1778	8.31059	10.3885	8.49147
341	44.089	42.595	64.649	22.706	17.926	33.23	34.91	14.345	6.739	8.394	9.859	13.914	26.877	33.196	13.126	14.81	12.932	22.692	50.4443	24.6207	14.6935	20.6055	12.3243	7.8296	10.3515	8.374
342	43.114	41.98	64.514	23.288	17.543	33.144	34.798	14.317	6.766	9.044	9.53	14.347	26.947	33.041	13.483	14.494	13.433	21.299	49.8693	24.6583	14.8003	20.4495	12.6953	7.89026	10.2548	8.18189
343	43.453	41.836	64.776	23.133	17.932	33.061	34.618	14.317	6.486	8.573	9.631	13.94	26.679	33.121	12.844	14.696	13.109	22.709	50.0217	24.7087	14.5942	20.5263	12.8032	7.68659	10.277	8.3579
344	43.188	41.362	64.613	22.737	17.582	33.187	34.723	14.171	6.487	8.975	9.804	13.869	26.751	33.049	13.153	14.314	12.78	21.694	49.721	24.502	14.6715	20.2902	12.9291	7.95081	10.2575	8.36131
345	43.01	41.85	64.346	22.688	17.29	32.986	34.598	14.015	7.063	9.094	9.681	14.538	26.772	32.963	13.432	14.275	13.316	22.193	49.7353	24.3213	14.8315	20.4918	12.6665	7.97446	10.112	8.22006
346	41.955	40.936	64.779	22.097	17.341	32.764	34.538	13.995	6.426	7.86	9.867	13.975	26.619	33.234	13.702	14.361	13.388	21.248	49.2233	24.0673	14.4435	20.4253	13.4812	7.89803	10.3226	8.18051
347	43.785	41.346	64.21	22.436	17.526	32.587	34.496	13.975	6.717	8.546	9.96	14.046	26.523	32.948	13.369	14.108	12.787	21.877	49.7803	24.183	14.6233	20.2687	12.5558	7.68098	10.1673	8.29462
348	42.493	41.365	64.266	21.888	17.16	32.942	34.397	14.073	6.371	8.799	9.316	14.467	26.578	33.373	12.675	14.075	13.105	21.372	49.3747	23.9967	14.5705	20.1963	12.9086	8.09955	10.2127	8.486
349	42.877	40.932	64.092	22.529	16.928	32.741	34.397	14.043	6.541	8.644	9.884	13.32	26.626	32.828	13.524	14.01	13.241	21.29	49.3003	24.066	14.4715	20.2532	12.8468	8.01776	10.163	8.16387
350	42.921	42.311	64.273	22.616	17.047	32.732	34.274	14.083	6.454	8.587	9.518	13.884	26.375	33.402	13.53	14.43	13.579	21.38	49.835	24.1317	14.4667	20.4493	12.5074	7.95159	10.1595	8.18611
351	43.254	41.446	64.316	22.122	17.278	32.314	34.183	13.867	6.747	8.972	9.722	14.856	26.637	32.857	13.838	13.713	13.201	21.115	49.672	23.9047	14.7245	20.2268	12.7143	7.67488	10.0114	8.17325
352	42.197	40.98	63.799	22.791	16.872	32.496	34.078	13.874	6.532	8.486	9.62	13.938	26.265	33.02	12.751	13.855	12.688	21.924	48.992	24.053	14.4213	20.0838	12.8377	7.88808	10.0741	8.44043
353	41.718	41.337	63.576	22.598	17.167	32.68	34.269	13.951	6.684	9.179	9.179	14.054	26.309	33.069	12.988	14.61	13.467	21.82	48.877	24.1483	14.5527	20.3772	12.7311	7.87184	10.0897	8.17265
354	43.193	41.144	63.546	22.478	16.743	32.177	34.165	13.708	6.504	8.324	9.944	13.789	26.374	32.637	13.499	14.392	12.772	21.938	49.2943	23.7993	14.4057	20.2687	12.3848	7.80138	10.1057	8.11913
355	42.13	42.508	63.801	22.625	16.401	32.49	34.077	13.917	6.601	8.587	10.005	14.385	26.139	33.01	12.619	14.101	13.392	21.711	49.4797	23.8387	14.5953	20.162	12.4041	8.11287	10.0112	8.27841
356	43.168	42.38	63.419	21.592	17.242	32.47	33.939	13.829	6.399	8.983	9.819	14.058	26.195	32.802	12.929	14.626	13.302	21.545	49.6557	23.768	14.5045	20.2332	11.9259	7.84374	9.96489	8.10027
357	42.285	41.708	63.901	22.551	17.278	32.447	33.765	13.769	6.427	8.899	10.142	13.667	26.319	32.761	12.514	14.1	13.233	21.815	49.298	24.092	14.4448	20.1237	12.6499	7.70102	9.87813	8.2779
358	41.832	40.861	63.492	22.732	17.157	32.4	33.716	13.744	6.508	8.653	9.655	13.989	26.235	32.862	12.609	14.019	12.674	22.224	48.7283	24.0963	14.3775	20.1038	12.7949	7.71254	9.91495	8.40544
359	42.334	40.686	63.924	22.219	16.981	32.215	33.718	13.82	6.208	8.152	9.152	13.655	26.244	32.651	13.214	14.921	13.125	21.38	48.9813	23.805	14.1175	20.2558	12.9669	7.73985	10.0726	7.99573
360	40.786	41.067	63.664	21.942	17.287	32.047	33.573	13.899	6.458	8.836	9.311	13.729	26.252	32.728	12.676	14.47	13.121	21.927	48.5057	23.7587	14.301	20.1957	13.1283	7.54583	9.88107	8.19897
361	40.976	39.857	63.638	21.897	16.513	31.883	33.588	13.678	6.019	8.353	9.457	13.067	26.112	32.354	12.584	14.633	12.694	21.345	48.157	23.431	14.027	19.9537	13.4186	7.79898	10.0088	8.11115
362	41.359	39.892	63.372	22.28	16.28	31.737	33.59	13.587	6.453	8.29	9.606	13.482	25.998	32.408	13.681	14.335	12.509	20.859	48.2077	23.4323	14.168	19.965	13.1532	7.79266	9.92881	7.98501
363	41.742	40.115	63.436	22.122	16.591	32.023	33.469	13.412	6.167	8.695	9.629	13.351	26.163	32.539	12.94	13.954	12.824	21.142	48.431	23.5787	14.1205	19.927	13.0201	7.81844	9.88257	8.1777
364	42.788	41.011	63.312	21.834	16.808	32.075	33.656	13.59	6.425	8.548	9.551	13.589	26.008	32.659	12.76	14.106	12.937	21.667	49.037	23.5723	14.2265	20.0228	12.3944	7.78053	9.93263	8.19957
365	42.115	39.691	63.18	22.133	16.71	31.962	33.534	13.647	6.271	8.756	10.105	13.165	26.096	32.546	13.034	14.346	12.937	21.3	48.3287	23.6017	14.2463	20.0432	12.9186	7.73134	9.8432	8.08234
366	41.802	40.831	63.165	22.175	17.155	31.986	33.282	13.559	6.599	8.737	9.374	13.53	25.904	32.308	12.785	14.197	12.726	21.189	48.5993	23.772	14.1802	19.8515	12.6236	7.54337	9.75592	8.07797
367	41.909	39.863	63.067	21.186	16.689	32.153	33.313	13.542	6.426	8.486	9.517	13.551	25.967	32.427	12.994	14.418	12.252	20.424	48.2797	23.3427	14.1392	19.747	12.847	7.95438	9.80973	8.12534
368	41.142	40.223	63.217	21.723	16.632	31.849	33.166	13.485	6.695	8.813	9.596	13.242	25.836	32.419	12.968	14.281	13.257	21.829	48.194	23.4013	14.1662	20.0983	13.0184	7.74609	9.67133	7.99002
369	40.949	40.704	63.005	21.44	16.723	31.876	33.094	13.557	6.401	8.07	9.525	12.894	25.887	32.465	12.906	14.227	12.496	21.21	48.2193	23.3463	13.9235	19.8652	12.8053	7.75428	9.78673	8.14064
370	40.857	40.441	62.841	21.169	16.004	31.504	33.037	13.351	6.314	8.557	9.42	12.473	25.822	32.307	12.293	13.969	12.612	20.398	48.0463	22.8923	13.8587	19.5668	12.8142	7.8924	9.7439	8.18222
371	41.188	39.718	62.841	21.461	16.649	31.775	33.102	13.486	6.418	8.108	9.438	13.214	25.81	32.004	13.317	14.219	12.456	20.95	47.9157	23.295	13.961	19.7927	12.9466	7.72798	9.78543	7.91822
372	40.255	40.224	62.667	21.678	16.908	31.916	32.978	13.55	6.28	8.297	10.233	13.035	25.698	32.092	12.358	13.649	12.484	20.623	47.7153	23.5007	14.0622	19.484	12.9485	7.66822	9.67045	8.1572
373	40.35	40.398	62.57	21.43	16.254	31.635	32.969	13.62	6.555	8.411	9.594	13.129	25.703	32.333	13.273	14.06	12.608	19.915	47.7727	23.1063	14.0463	19.6487	12.8149	7.82632	9.6622	7.98839
374	41.033	40.491	62.722	22.015	16.882	31.506	32.885	13.21	6.38	8.752	9.724	13.263	25.692	32.175	12.338	13.837	13.168	21.09	48.082	23.4677	14.0357	19.7167	12.6815	7.41944	9.6093	8.05855
375	41.504	40.744	62.904	21.778	17.381	31.294	32.793	13.34	6.298	8.181	9.766	13.387	25.7	32.209	12.24	14.632	12.773	20.356	48.384	23.4843	13.9608	19.6517	12.5804	7.11172	9.64456	8.02759
376	40.865	39.481	62.9	21.164	16.619	31.604	32.637	13.409	6.099	8.412	9.513	12.406	25.652	32.044	12.789	14.182	12.374	20.755	47.7487	23.129	13.746	19.6327	13.1397	7.68332	9.62939	8.00958
377	41.629	39.585	62.688	21.6	16.397	31.275	32.643	13.255	6.43	7.97	9.825	13.19	25.574	32.164	11.989	14.164	12.498	20.814	47.9673	23.0907	13.8855	19.5338	12.7894	7.55018	9.58948	8.15973
378	40.818	40.006	62.586	21.458	16.833	31.409	32.444	13.129	6.481	8.439	9.511	12.942	25.428	32.149	12.646	13.831	12.636	19.773	47.8033	23.2333	13.8243	19.4105	12.8086	7.44841	9.4814	8.01741
379	40.416	39.421	62.82	20.947	16.438	31.624	32.654	13.448	6.645	8.234	9.335	12.879	25.556	32.237	12.734	13.784	12.819	20.691	47.5523	23.003	13.8658	19.6368	13.2315	7.79897	9.57633	8.04114
380	39.976	38.282	62.799	21.163	15.99	31.215	32.412	13.298	6.698	7.873	9.673	12.923	25.607	31.987	13.08	13.656	12.237	20.064	47.019	22.7893	13.8128	19.4385	13.6921	7.7417	9.48711	8.02042
381	40.713	39.442	61.867	21.379	16.251	31.368	32.445	13.575	6.659	7.885	10.333	12.858	25.446	31.99	13.384	13.679	12.393	20.48	47.3407	22.9993	13.9592	19.562	12.5962	7.68765	9.44906	7.9258
382	40.561	38.711	62.326	20.836	16.379	31.278	32.543	13.521	6.455	7.912	9.886	13.048	25.559	31.97	13.084	14.081	12.554	20.08	47.1993	22.831	13.8942	19.5547	13.1327	7.64723	9.54806	7.89061
383	39.954	39.541	62.681	21.79	16.083	31.56	32.365	13.33	6.467	8.08	9.319	12.624	25.402	32.404	12.616	13.374	12.456	19.908	47.392	23.1443	13.6975	19.36	13.2423	7.82688	9.51599	8.19672
384	40.43	38.616	61.788	21.304	16.215	31.197	32.479	13.06	6.208	8.244	9.479	12.679	25.482	31.823	12.175	13.67	12.481	20.162	46.9447	22.9053	13.6915	19.2988	12.8867	7.61829	9.56888	8.05912
385	40.47	39.371	62.095	21.303	16.328	31.465	32.428	13.231	6.312	7.874	9.965	12.315	25.374	32.165	12.858	13.704	12.376	20.128	47.312	23.032	13.6875	19.4342	12.8142	7.7152	9.54306	8.04656
386	40.768	39.834	62.174	20.984	16.583	31.305	32.402	13.226	6.421	8.477	10.24	12.507	25.399	32.1	12.829	13.471	12.582	19.591	47.592	22.9573	13.8788	19.3287	12.637	7.55678	9.4176	8.02621
387	40.018	39.048	61.638	21.228	16.527	31.139	32.129	13.294	6.282	8.403	9.52	12.957	25.342	31.91	13.089	13.897	12.649	20.846	46.9013	22.9647	13.7642	19.6222	12.7715	7.4592	9.39018	7.86499
388	40.2	39.244	62.189	20.825	16.878	30.99	32.175	13.268	6.296	8.536	9.822	12.513	25.176	31.932	12.593	13.978	12.872	20.078	47.211	22.8977	13.7683	19.4382	12.9801	7.28073	9.37463	7.864
389	40.185	38.514	61.718	20.966	16.621	31.05	32.185	13.374	6.129	8.311	10.27	12.914	25.248	32.059	12.563	14.388	12.671	19.493	46.8057	22.879	13.8638	19.4037	12.9415	7.40228	9.38493	7.89433
390	40.226	38.201	61.767	20.986	16.18	30.956	32.252	13.459	6.405	8.299	9.689	12.286	25.216	32.195	12.797	13.182	12.177	20.121	46.7313	22.7073	13.7317	19.2813	13.0606	7.53689	9.43084	8.15363
391	40.391	38.362	62.398	20.516	15.786	31.164	31.931	13.089	6.574	8.415	10.221	12.489	25.068	31.827	12.745	13.563	12.265	20.278	47.0503	22.4887	13.7865	19.291	13.3301	7.8765	9.21932	7.95643
392	40.299	39.09	61.801	21.488	16.589	31.13	31.921	13.306	6.312	8.105	10.389	12.748	25.08	31.719	12.367	13.972	12.914	20.369	47.0633	23.069	13.7968	19.4035	12.7775	7.3983	9.2721	7.82245
393	39.451	39.117	61.475	20.901	16.002	30.997	31.94	13.312	5.782	8.084	9.722	12.149	25.172	31.778	12.293	13.378	12.589	19.763	46.681	22.6333	13.4982	19.1622	12.8131	7.64613	9.4347	7.99358
394	40.05	38.718	61.291	20.715	16.17	30.895	31.828	13.384	6.162	7.803	9.809	12.41	25.104	31.757	12.471	13.538	12.253	19.978	46.6863	22.5933	13.566	19.1835	12.6655	7.54006	9.34897	7.9842
395	39.94	39.343	60.993	20.921	16.284	31.011	31.779	13.523	6.572	8.111	10.28	12.26	24.996	32.175	13.009	13.329	12.528	19.475	46.7587	22.7387	13.7542	19.252	12.3309	7.52988	9.19434	7.99145
396	40.488	39.167	61.626	20.423	16.055	30.996	31.965	13.22	6.082	8.486	9.31	12.31	25.09	32.18	11.719	12.947	12.372	19.863	47.0937	22.4913	13.5622	19.0285	12.6027	7.68224	9.38244	8.3081
397	39.563	38.478	61.804	20.458	15.879	31.112	31.76	13.459	6.68	8.088	9.723	12.548	25.063	31.59	12.285	13.262	12.31	19.551	46.615	22.483	13.7097	19.0102	13.1652	7.81579	9.21021	7.97926
398	39.778	38.295	61.882	20.993	15.967	30.835	31.537	13.387	6.071	8.021	9.503	12.987	25.03	31.901	12.359	13.536	12.35	20.415	46.6517	22.5983	13.5843	19.2652	13.2107	7.56288	9.23853	8.03191
399	39.777	38.947	61.622	20.733	16.191	30.86	31.642	13.373	6.276	8.058	9.748	12.328	25.193	31.926	12.539	13.596	12.238	19.511	46.782	22.5947	13.5708	19.1672	12.8585	7.50961	9.2344	8.02746
400	39.359	39.468	61.356	20.349	16.27	31.039	31.71	13.252	6.486	7.816	9.793	12.471	24.938	31.984	11.878	13.062	12.346	19.788	46.7277	22.5527	13.588	18.9993	12.6686	7.62712	9.2512	8.18197
401	39.099	38.59	60.907	20.29	15.908	30.818	31.594	13.522	6.591	8.286	9.397	12.606	25.003	31.991	12.067	13.254	11.865	19.781	46.1987	22.3387	13.666	18.9935	12.7403	7.66321	9.16277	8.21466
402	40.906	38.587	60.992	20.79	16.34	30.965	31.624	13.377	6.718	8.585	9.807	12.784	24.945	31.772	12.975	13.63	12.69	20.257	46.8283	22.6983	13.8158	19.3782	12.3208	7.49693	9.07964	7.79926
403	39.125	38.165	61.647	20.702	16.204	30.898	31.541	13.692	6.651	8.215	9.864	12.172	25.01	32.102	13.032	13.746	11.902	18.828	46.3123	22.6013	13.6892	19.1033	13.2889	7.52888	9.11179	8.01687
404	38.747	38.131	61.1	20.305	15.801	31.22	31.412	13.774	6.779	8.216	9.786	11.884	24.701	31.791	12.259	13.512	12.221	19.792	45.9927	22.442	13.6418	19.046	13.087	7.92852	9.05861	7.97797
405	39.281	38.565	60.956	20.662	16.217	31.046	31.355	13.518	6.878	8.056	9.429	12.681	24.853	31.741	12.877	13.934	12.368	19.603	46.2673	22.6417	13.6528	19.2293	12.7258	7.61013	9.04868	7.79458
406	38.613	37.6	60.822	19.751	15.255	30.94	31.446	13.704	6.736	8.118	9.193	11.679	24.793	31.788	11.839	13.306	11.756	19.061	45.6783	21.982	13.4793	18.7572	13.1246	8.07699	9.15076	8.15989
407	38.949	37.997	61.47	19.747	15.614	31.329	31.323	13.751	7.027	8.049	9.39	12.51	24.76	32.107	12.927	12.962	12.307	19.279	46.1387	22.23	13.675	19.057	13.2859	8.14643	9.02246	8.03946
408	38.41	37.218	61.039	20.028	15.26	30.891	31.209	13.856	6.409	7.669	9.975	12.124	24.616	31.75	12.695	13.347	11.935	18.601	45.5557	22.0597	13.5403	18.824	13.4222	8.0111	9.08105	7.94606
409	39.035	38.236	61.077	20.05	16.118	30.773	31.33	13.868	7.179	8.051	9.884	11.826	24.672	31.679	12.128	12.939	12.077	19.768	46.116	22.3137	13.6897	18.8772	12.9628	7.58521	8.98168	8.06618
410	39.163	38.338	61.17	19.832	16.292	30.994	31.202	14.227	6.922	8.065	9.423	12.138	24.649	32.253	12.214	13.302	12.187	19.137	46.2237	22.3727	13.6628	18.957	12.9505	7.67323	9.00018	8.15469
411	38.594	37.967	60.701	19.755	15.267	30.752	31.132	14.112	7.1	8.333	9.476	12.339	24.64	31.844	12.518	12.934	12.082	18.822	45.754	21.9247	13.7487	18.8067	12.9483	7.96724	8.90044	8.04061
412	38.7	37.929	60.709	20.594	15.762	30.483	31.097	14.047	6.773	8.716	9.679	11.766	24.671	31.27	12.102	13.355	12.44	19.663	45.7793	22.2797	13.6797	18.9168	12.9352	7.50387	8.89388	7.81784
413	39.109	37.873	60.812	20.13	16.508	31.027	31.117	14.294	6.584	8.413	9.331	12.369	24.552	31.938	12.718	13.687	12.285	18.828	45.9313	22.555	13.6847	19.0013	12.9018	7.55717	8.97945	7.88706
414	39.378	37.889	61.031	20.805	15.815	30.89	31.164	14.149	7.182	8.356	9.134	12.686	24.549	31.875	11.994	13.566	11.857	19.418	46.0993	22.5033	13.7785	18.8765	12.9526	7.67966	8.92273	8.07806
415	38.182	37.581	60.867	19.657	15.695	30.767	31.012	14.241	7.233	8.816	9.88	12.161	24.642	31.914	12.812	13.139	12.539	19.451	45.5433	22.0397	13.8905	19.0828	13.2741	7.81339	8.74548	7.91395
416	38.129	37.795	60.928	20.084	16.215	30.738	31.029	14.412	6.99	8.213	9.55	12.17	24.629	31.785	12.894	13.823	11.695	18.976	45.6173	22.3457	13.7273	18.967	13.2605	7.52102	8.89372	7.90675
417	38.315	37.751	60.895	20.99	15.668	30.793	30.86	14.528	6.698	8.513	9.94	11.632	24.502	32.055	12.019	13.289	12.266	18.999	45.6537	22.4837	13.6952	18.855	13.2024	7.67233	8.82608	8.09043
418	38.006	37.445	60.619	20.203	15.63	30.977	30.915	14.721	7.498	8.341	9.48	12.02	24.434	31.576	12.729	13.58	11.81	18.241	45.3567	22.27	13.8292	18.7283	13.2205	7.87953	8.77625	7.85131
419	38.162	36.99	59.721	19.175	15.217	30.624	30.678	14.685	6.501	8.169	9.579	11.685	24.445	31.912	12.247	13.01	11.464	19.344	44.9577	21.672	13.5495	18.737	12.7988	8.00126	8.86056	8.17735
420	37.736	37.641	60.339	20.311	16.252	30.527	30.851	14.636	7.395	8.562	9.656	11.923	24.52	31.225	13.08	12.954	11.939	18.805	45.2387	22.3633	13.8372	18.7538	13.0774	7.35547	8.72449	7.75956
421	38.5	37.647	60.163	19.982	15.943	30.578	30.79	14.735	7.329	8.352	9.998	11.949	24.404	31.409	12.716	13.138	12.193	18.808	45.4367	22.1677	13.8588	18.778	12.7605	7.55835	8.70574	7.78607
422	37.221	37.145	60.029	19.109	15.272	30.445	30.741	15.079	7.334	7.961	9.607	11.329	24.462	31.458	12.544	12.417	11.511	18.142	44.7983	21.6087	13.6752	18.4223	13.1902	7.88931	8.81056	8.06065
423	38.185	36.558	60.471	19.146	15.584	30.427	30.753	15.079	7.134	8.306	9.596	11.899	24.347	31.632	12.411	13.343	12.406	19.315	45.0713	21.719	13.7945	18.909	13.3613	7.7488	8.77436	7.83715
424	38.447	37.383	60.326	19.537	15.811	30.702	30.791	15.402	7.47	7.968	9.8	11.177	24.456	32.06	12.423	13.291	11.678	18.817	45.3853	22.0167	13.768	18.7875	12.9499	7.749	8.81153	8.11856
425	37.595	36.629	60.325	19.401	15.827	30.647	30.699	15.311	7.358	8.131	9.097	11.721	24.41	31.71	12.794	12.961	11.721	18.58	44.8497	21.9583	13.7195	18.696	13.4107	7.73389	8.80793	7.98
426	37.331	37.249	60.718	19.472	15.675	31.16	30.779	15.74	7.461	8.196	9.549	11.585	24.336	32.229	12.961	12.775	11.439	18.56	45.0993	22.1023	13.885	18.7167	13.5262	8.07064	8.79286	8.19244
427	38.324	37.668	60.356	18.89	15.387	30.944	30.851	15.733	7.779	7.965	9.629	11.772	24.335	31.926	12.364	13.244	11.292	18.138	45.4493	21.7403	13.9548	18.5498	12.9137	8.16078	8.78793	8.14435
428	37.165	36.439	60.428	19.694	16.034	31.133	30.871	16.127	7.802	8.788	10.029	12.071	24.359	32.265	12.819	13.447	11.753	18.832	44.6773	22.287	14.2813	18.9125	13.6453	7.8764	8.64581	8.07739
429	38.411	37.846	60.503	20.158	15.68	31.415	30.823	16.415	7.777	7.959	9.625	11.351	24.246	31.75	12.914	13.582	11.857	18.06	45.5867	22.4177	13.9917	18.7348	12.921	8.10723	8.83428	7.84807
430	37.813	36.939	60.091	19.234	15.696	31.086	30.785	16.689	8.42	8.241	9.319	11.313	24.315	31.993	13.834	12.726	11.197	18.098	44.9477	22.0053	14.1278	18.6938	13.1218	8.0606	8.74418	8.05302
431	38.045	37.8	60.072	19.814	15.881	31.643	30.991	16.652	7.633	8.552	9.646	11.409	24.298	32.487	13.379	13.269	11.67	18.019	45.3057	22.446	14.1472	18.8537	12.7886	8.20401	8.84858	8.11136
432	37.594	37.921	60.685	18.756	15.745	32.016	31.083	16.938	8.42	8.085	10	11.031	24.304	32.763	14.238	13.142	11.031	17.725	45.4	22.1723	14.2595	18.8672	13.2382	8.65678	8.84302	8.241
433	37.579	38.604	60.379	19.148	16.284	31.962	30.942	17.009	8.58	8.801	9.566	11.567	24.373	32.848	14.544	13.519	11.843	18.058	45.5207	22.4647	14.4108	19.1975	12.8779	8.34866	8.68399	8.03006
434	37.353	37.884	60.324	19.176	15.795	31.942	30.941	17.377	8.672	7.873	9.628	11.657	24.223	32.572	14.523	13.009	11.335	17.469	45.187	22.3043	14.358	18.8552	13.1117	8.51594	8.81095	8.10413
435	36.812	38.041	60.489	19.488	15.403	32.438	31.174	17.573	8.615	8.048	9.952	11.25	24.211	33.011	13.974	13.153	11.925	17.74	45.114	22.443	14.4353	19.0023	13.3293	8.89364	8.88762	8.1799
436	37.668	38.278	61.091	19.031	16.484	32.974	31.09	17.687	8.346	7.767	9.22	11.372	24.192	32.96	14.388	13.417	11.892	17.596	45.679	22.8297	14.247	19.0742	13.3507	8.87707	9.00965	8.08382
437	38.136	37.99	60.13	19.278	16.542	32.446	31.232	17.766	8.656	8.244	9.411	11.289	24.064	33.472	14.3	13.241	11.472	17.016	45.4187	22.7553	14.433	18.9275	12.7406	8.50313	8.94537	8.37752
438	37.45	37.981	60.925	19.113	16.12	33.112	31.177	17.804	9.07	8.297	9.85	11.612	24.308	33.353	15.796	12.787	10.968	17.162	45.452	22.7817	14.635	19.0623	13.4026	9.07063	8.79607	8.37757
439	37.362	38.894	60.748	19.146	15.79	33.309	31.204	18.106	8.877	7.662	9.311	11.465	24.116	33.966	15.288	12.493	11.057	17.051	45.668	22.7483	14.4375	18.9952	13.0821	9.29846	9.01684	8.63903
440	36.643	36.856	60.849	19.048	15.95	33.197	31.262	18.651	9.251	7.917	9.853	10.995	23.974	33.786	14.633	13.86	10.008	16.841	44.7827	22.7317	14.6548	18.8503	13.9143	9.19466	8.97574	8.65147
441	36.933	38.182	60.857	18.889	15.027	33.269	31.265	18.642	9.78	8.128	8.916	11.164	24.144	34.468	15.868	12.068	10.799	16.929	45.324	22.395	14.6492	19.046	13.4665	9.6131	8.98085	8.88948
442	36.534	38.034	60.378	19.283	15.847	33.049	31.323	18.633	9.314	7.705	9.357	11.141	24.016	34.142	16.065	13.058	10.685	17.556	44.982	22.7263	14.5788	19.2537	13.3544	9.10327	9.06485	8.59302
443	37.356	39.157	60.711	19.309	16.116	33.358	31.55	19.18	9.703	8.002	10.045	11.103	24.091	34.582	16.34	13.034	10.509	16.636	45.7413	22.9277	14.9305	19.1987	12.9953	9.17293	9.03454	8.81855
444	37.901	38.438	61.095	19.04	16.067	33.41	31.46	19.184	10.04	8.58	9.224	11.32	24.074	35.238	15.987	13.255	10.496	17.374	45.8113	22.839	14.968	19.404	13.2388	9.27465	8.95716	9.00538
445	37.299	37.333	60.808	18.472	15.717	34.082	31.694	19.399	10.154	7.859	9.498	11.222	24.071	35.24	16.619	12.422	10.36	16.377	45.1467	22.757	14.971	19.1815	13.5631	9.904	9.133	9.16214
446	38.61	38.884	60.97	18.613	16.345	34.648	31.844	19.841	9.753	8.703	10.264	11.519	24.311	35.399	16.912	13.192	10.73	17.375	46.1547	23.202	15.3207	19.6532	12.8312	9.97718	9.03625	8.98555
447	37.78	37.78	61.137	18.241	15.35	35.382	31.748	20.754	10.816	7.729	9.12	10.883	23.902	36.464	18.189	12.027	9.631	15.922	45.5657	22.991	15.175	19.3558	13.4852	10.8278	9.33078	9.74468
448	38.586	38.197	60.253	18.328	16.49	35.382	31.928	20.354	10.866	8.222	9.576	11.476	24.049	36.163	18.888	13.345	10.48	16.101	45.6787	23.4	15.4037	19.8377	12.6232	10.4173	9.15548	9.26107
449	37.767	37.92	61.25	18.418	16.478	35.131	31.988	20.732	10.939	8.491	9.835	10.476	24.157	36.229	18.881	12.966	10.385	16.387	45.6457	23.3423	15.4102	19.8342	13.514	10.2553	9.23516	9.34588
450	37.494	38.417	60.481	17.691	15.329	35.316	31.838	21.193	11.295	7.539	9.526	10.433	24.028	36.019	18.062	13.139	9.948	16.143	45.464	22.7787	15.304	19.5565	13.0133	10.9217	9.39716	9.36377
451	37.445	39.354	60.792	17.964	16.691	34.857	31.869	21.158	10.947	8.598	9.528	10.605	24.132	36.348	19.065	12.759	10.573	15.826	45.8637	23.1707	15.4508	19.7838	12.9635	10.1407	9.25133	9.41963
452	36.815	38.934	61.092	17.845	16.123	35.503	31.643	21.035	10.531	7.846	9.733	10.743	24.068	36.692	18.467	12.846	10.247	16.554	45.6137	23.157	15.2552	19.8123	13.4464	10.7266	9.274	9.54448
453	37.257	38.864	60.101	17.842	16.049	34.747	31.701	21.38	10.656	7.982	9.268	10.841	23.912	36.002	18.647	12.718	9.893	15.863	45.4073	22.8793	15.3047	19.5058	12.7504	10.3167	9.3525	9.42366
454	36.923	38.718	60.847	18.353	16.038	34.756	31.63	21.214	11.299	7.868	9.21	10.602	23.984	36.279	19.237	12.733	10.149	16.239	45.496	23.049	15.3038	19.7702	13.3246	10.2044	9.29566	9.43546
455	37.016	38.506	60.204	17.638	14.856	34.932	31.545	21.817	11.686	7.983	9.341	10.865	23.817	36.101	18.213	12.438	9.771	15.436	45.242	22.4753	15.5395	19.296	12.9789	10.8771	9.24992	9.55696
456	36.627	38.949	60.177	17.144	16.716	35.257	31.642	22.168	10.769	8.3	8.877	10.721	23.935	36.614	18.27	12.138	9.503	15.744	45.251	23.039	15.4128	19.3673	12.9783	10.5833	9.44358	9.82051
457	37.184	37.854	60.692	17.845	15.757	34.55	31.452	22.454	11.187	7.787	9.509	10.683	23.734	36.499	18.714	12.359	10.195	15.056	45.2433	22.7173	15.512	19.4262	13.3831	10.3004	9.38095	9.64162
458	37.271	38.526	60.423	17.499	15.49	34.971	31.371	22.552	11.479	8.417	9.096	10.898	23.672	36.672	18.646	12.079	10.13	15.712	45.4067	22.6533	15.6355	19.4852	13.0197	10.7146	9.27401	9.69771
459	37.459	38.715	60.352	18.021	16.307	35.139	31.236	22.895	11.866	8.301	9.778	11.3	23.617	36.607	18.491	12.806	10.059	16.366	45.5087	23.1557	15.896	19.6577	12.87	10.4132	9.12995	9.53134
460	36.723	39.578	60.732	17.426	16.146	35.179	31.303	22.953	11.633	8.72	9.409	10.928	23.691	36.927	18.382	12.771	9.705	16.02	45.6777	22.917	15.8243	19.5827	13.1154	10.6385	9.20409	9.75506
461	36.05	38.204	60.21	17.677	15.603	34.662	31.277	23.223	11.547	8.109	9.394	10.678	23.688	36.207	18.811	12.927	9.742	15.509	44.8213	22.6473	15.7047	19.4807	13.3704	10.4566	9.37118	9.50249
462	37.006	37.5	60.627	17.287	16.077	35.414	31.243	23.031	11.782	8.143	9.274	10.159	23.613	36.572	18.919	12.721	9.456	16.402	45.0443	22.926	15.6053	19.6138	13.4972	10.8318	9.37795	9.64432
463	36.976	37.969	60.173	17.652	15.786	34.921	31.076	23.381	11.663	8.723	9.632	10.771	23.523	36.38	18.923	12.333	9.935	15.677	45.0393	22.7863	15.8743	19.4618	13.1155	10.5503	9.17963	9.58033
464	36.087	38.429	59.398	17.341	15.42	34.828	31.191	24.077	11.55	8.106	9.908	10.676	23.466	36.019	19.296	12.634	9.932	15.24	44.638	22.5297	15.918	19.4312	12.8361	10.6939	9.41848	9.43881
465	36.251	38.273	60.406	17.132	15.893	35.322	30.934	23.984	11.96	8.11	9.01	10.74	23.47	36.337	18.977	12.75	9.676	15.578	44.9767	22.7823	15.7897	19.4647	13.4004	10.8773	9.39792	9.55999
466	36.388	37.782	60.436	17.185	16.16	34.726	31.05	24.105	12.018	8.218	9.67	11.077	23.463	36.396	18.611	12.448	9.463	15.41	44.8687	22.6903	16.023	19.2985	13.4997	10.4358	9.30496	9.68429
467	36.387	37.035	59.671	17.166	15.599	35.179	30.954	24.13	11.76	8.265	8.946	10.649	23.365	36.125	19.055	12.477	9.889	15.316	44.3643	22.648	15.784	19.3712	13.2599	10.8804	9.44075	9.49344
468	36.351	38.286	59.251	18.018	15.814	34.57	30.875	24.319	11.629	8.492	8.987	10.786	23.445	35.702	19.432	12.788	9.909	15.791	44.6293	22.8007	15.848	19.5112	12.6996	10.2519	9.404	9.26139
469	35.917	37.78	60.399	16.999	15.698	35.123	30.84	24.83	11.848	8.334	9.448	10.616	23.237	36.356	19.566	12.667	9.326	15.235	44.6987	22.6067	15.986	19.3978	13.6288	10.859	9.4458	9.65839
470	36.472	37.973	60.098	16.855	15.724	34.471	30.817	24.927	11.719	8.536	9.243	10.581	23.368	36.178	18.733	12.636	9.765	15.365	44.8477	22.35	15.9705	19.3408	13.2285	10.5123	9.4688	9.51353
471	36.49	38.333	60.28	17.508	16.014	34.467	30.644	25.242	11.596	8.662	9.436	11.149	23.155	36.194	19.568	12.37	9.698	15.556	45.0343	22.663	16.1215	19.4235	13.2353	10.2498	9.37691	9.53404
472	36.349	37.273	60.297	17.372	15.598	35.182	30.454	25.2	11.844	8.03	9.762	10.517	23.302	36.043	18.522	12.459	9.793	15.472	44.6397	22.7173	15.9678	19.2652	13.5675	10.8311	9.41617	9.47394
473	35.833	37.552	59.41	16.631	15.669	34.259	30.598	25.499	11.922	8.345	9.385	10.279	23.258	35.747	18.899	12.34	9.641	15.276	44.265	22.1863	16.0047	19.1935	13.1441	10.4663	9.53991	9.42542
474	36.241	37.764	59.792	17.378	15.219	34.255	30.617	25.756	11.869	8.52	9.349	10.602	23.112	36.119	18.692	12.366	9.783	14.901	44.599	22.284	16.1188	19.1622	13.1795	10.4232	9.54087	9.54642
475	36.288	37.411	59.73	17.15	15.475	34.437	30.418	25.564	12.281	8.451	9.288	10.642	23.213	35.949	18.451	12.52	9.445	15.254	44.4763	22.354	16.1073	19.1387	13.222	10.4976	9.42186	9.51341
476	36.343	38.282	59.388	17.272	15.788	34.34	30.363	25.811	12.185	8.496	9.195	10.417	23.216	35.671	18.89	12.827	9.649	15.15	44.671	22.4667	16.0778	19.2338	12.7821	10.3093	9.49587	9.33542
477	36	37.832	59.488	16.964	15.841	34.207	30.354	26.026	11.91	8.445	9.336	10.5	23.174	35.637	19.516	12.498	9.716	15.263	44.44	22.3373	16.0952	19.3007	13.0641	10.2948	9.53906	9.34205
478	35.832	37.734	59.48	17.089	15.798	34.237	30.323	26.192	12.39	8.494	9.576	10.604	23.137	35.905	18.884	12.483	9.546	15.296	44.3487	22.3747	16.2632	19.2085	13.1386	10.2933	9.4696	9.468
479	35.765	37.504	59.62	17.167	15.533	34.06	30.388	26.37	12.383	8.624	9.46	10.31	23.243	35.733	19.238	12.839	9.564	15.301	44.2963	22.2533	16.2558	19.3197	13.2991	10.2575	9.55819	9.36075
480	36.781	38.396	59.884	17.355	15.799	34.335	30.221	26.621	12.402	8.574	9.555	10.587	23.145	36.266	18.949	12.917	9.835	15.497	45.0203	22.4963	16.3267	19.4348	12.8976	10.2821	9.52189	9.45976
481	36.734	37.825	60.226	17	15.761	34.29	30.311	26.468	11.87	8.551	9.392	10.564	23.073	36.094	18.758	12.768	9.76	15.651	44.9283	22.3503	16.1927	19.3507	13.2594	10.3586	9.59084	9.41856
482	36.711	37.891	59.459	17.16	15.828	33.951	30.277	26.721	12.39	8.9	9.699	10.377	23.107	35.974	19.28	12.79	10.095	15.188	44.687	22.313	16.394	19.4057	12.8065	10.1008	9.51424	9.34312
483	35.944	37.434	59.175	17.036	15.665	33.785	30.112	26.486	12.555	8.629	9.307	10.375	23.04	35.209	18.948	12.462	9.689	15.139	44.1843	22.162	16.244	19.0812	13.0037	10.0891	9.50141	9.20178
484	36.038	37.132	59.247	17.133	15.775	33.59	30.023	27.011	12.322	8.43	9.225	10.442	22.968	35.757	18.174	12.347	9.921	15.071	44.139	22.166	16.2422	19.0397	13.0953	9.91675	9.6453	9.37382
485	35.731	37.825	58.887	16.823	15.424	33.488	29.878	26.891	11.983	8.737	9.467	10.48	23.014	35.694	18.07	12.754	9.948	15.252	44.1477	21.9117	16.2393	19.122	12.8075	10.0498	9.51743	9.27983
486	35.466	36.692	58.922	17.301	15.638	33.649	29.939	26.812	12.762	8.496	9.732	10.777	22.929	35.177	18.978	12.494	9.714	15.448	43.6933	22.196	16.4197	19.1233	13.2027	9.95338	9.41807	9.14567
487	35.586	36.467	58.806	16.708	15.353	33.375	29.82	27.093	12.548	8.283	9.306	10.368	22.888	35.03	17.914	12.775	9.524	14.85	43.6197	21.812	16.2363	18.8302	13.1591	10.0367	9.60947	9.15261
488	35.675	36.638	58.322	16.74	15.229	33.406	29.726	26.723	12.135	8.444	9.507	10.044	22.826	35.084	18.345	12.239	9.686	15.021	43.545	21.7917	16.0965	18.8668	12.8063	10.0866	9.51834	9.1864
489	35.195	36.372	58.56	16.625	14.7	33.425	29.706	27.093	12.188	8.367	9.006	10.252	22.937	35.039	17.826	12.227	9.814	15.079	43.3757	21.5833	16.102	18.8203	13.1632	10.3003	9.64983	9.1604
490	35.016	36.76	58.592	16.92	15.744	33.392	29.644	27.027	12.667	8.627	9.418	10.27	22.831	34.933	18.165	12.419	10.016	15.095	43.456	22.0187	16.2755	18.9098	13.1371	9.86713	9.47548	9.03832
491	34.784	36.027	58.595	16.408	15.096	33.362	29.622	27.16	12.184	8.408	8.994	10.227	22.738	34.925	17.635	12.045	9.193	15.096	43.1353	21.622	16.0992	18.6053	13.4029	10.1883	9.6401	9.25524
492	35.09	36.28	58.879	16.355	15.136	33.092	29.589	27.158	12.141	8.31	9.097	10.386	22.708	35.017	18.094	12.48	9.343	14.654	43.4163	21.5277	16.1135	18.716	13.4043	10.0335	9.61541	9.22265
493	35.072	36.918	58.934	17.002	15.671	33.221	29.569	27.404	11.87	8.326	9.434	10.58	22.59	35.054	17.868	11.95	10.094	14.894	43.6413	21.9647	16.1972	18.7417	13.276	9.77096	9.61636	9.1365
494	35.119	35.838	58.328	16.589	15.338	33.056	29.552	27.538	12.289	8.542	9.335	10.185	22.733	35.295	18.395	12.5	9.839	14.815	43.095	21.661	16.2402	18.9295	13.1971	9.88816	9.63396	9.20312
495	34.911	36.728	57.992	16.516	14.908	33.084	29.52	27.176	12.134	8.538	9.198	10.354	22.693	34.879	18.007	12.432	9.695	14.799	43.2103	21.5027	16.1533	18.7508	12.8335	10.0619	9.55326	9.09686
496	34.489	36.245	58.341	16.681	15.254	32.779	29.421	27.456	12.079	8.664	9.675	10.278	22.64	35.051	18.154	12.442	9.436	15.333	43.025	21.5713	16.2622	18.8427	13.2931	9.73231	9.51724	9.15834
497	35.441	36.735	58.54	17.005	15.055	33.019	29.308	27.879	12.352	8.619	9.343	10.422	22.812	35.256	18.012	12.329	9.516	15.072	43.572	21.693	16.3205	18.8328	12.9788	9.85694	9.60015	9.26796
498	35.092	36.976	58.234	16.703	15.36	32.798	29.344	27.632	12.552	8.674	9.629	10.584	22.647	34.762	17.912	12.452	9.483	14.895	43.434	21.6203	16.4025	18.6918	12.8517	9.70341	9.46441	9.08467
499	34.678	36.217	58.16	16.683	15.1	32.754	29.189	27.712	12.309	8.728	9.311	10.51	22.638	34.9	18.161	11.936	9.728	14.779	43.0183	21.5123	16.2932	18.6903	13.1356	9.76769	9.50782	9.16363
500	34.504	35.463	58.156	16.809	15.088	32.867	29.247	27.483	12.381	8.44	9.318	10.223	22.601	34.877	17.89	12.454	9.748	14.739	42.7077	21.588	16.182	18.7182	13.3872	9.80573	9.54376	9.08193
501	34.26	36.118	58.052	16.62	15.162	32.823	29.201	27.841	12.695	8.82	9.476	10.014	22.604	34.763	18.442	11.973	9.403	14.606	42.81	21.535	16.3412	18.6318	13.2326	9.80284	9.5357	9.1842
502	34.606	35.415	57.754	16.913	15.345	32.564	29.246	27.878	12.396	8.496	9.197	10.522	22.447	34.723	18.605	12.666	9.782	14.604	42.5917	21.6073	16.2892	18.8045	13.1372	9.52109	9.60864	8.98262
503	34.638	35.403	57.824	16.239	14.862	32.731	29.012	27.91	12.61	8.491	9.633	10.306	22.403	34.444	18.198	12.599	9.867	14.964	42.6217	21.2773	16.327	18.7458	13.1712	9.94303	9.50112	8.84338
504	33.64	35.575	58.012	16.062	14.567	32.725	29.06	28.253	12.652	8.627	8.815	10.081	22.486	34.778	18.456	12.308	9.15	13.971	42.409	21.118	16.248	18.5248	13.5472	10.0797	9.72172	9.24267
505	33.985	35.358	57.343	16.415	14.977	32.57	29.08	27.946	12.146	8.677	8.969	10.32	22.54	34.518	17.791	12.287	9.617	14.869	42.2287	21.3207	16.1897	18.6037	13.1074	9.7687	9.63073	8.98921
506	34.026	35.835	57.647	16.62	14.721	32.288	28.902	28.23	12.439	8.641	9.484	9.81	22.373	34.736	18.277	11.956	9.192	14.35	42.5027	21.2097	16.251	18.4807	13.1465	9.64099	9.62566	9.22324
507	34.015	34.957	57.181	16.207	14.821	32.452	28.997	28.309	12.263	8.654	9.12	10.131	22.366	34.698	17.661	12.266	9.199	13.992	42.051	21.16	16.2457	18.3637	13.1114	9.80368	9.69309	9.20442
508	33.322	34.972	58.04	16.329	15.057	32.484	28.795	28.318	12.709	8.445	8.777	9.717	22.219	34.684	17.927	12.307	9.499	14.507	42.1113	21.29	16.1268	18.5238	13.8193	9.71513	9.74582	9.07076
509	33.698	34.792	57.653	15.703	15.139	32.502	28.781	28.441	12.126	8.566	9.279	10.246	22.286	34.623	17.644	11.893	9.625	14.506	42.0477	21.1147	16.2398	18.4295	13.5257	9.86575	9.65753	9.09239
510	34.159	35.76	57.364	16.555	15.472	32.173	28.767	27.891	12.484	8.698	8.917	10.599	22.285	34.211	17.329	12.166	9.274	14.585	42.4277	21.4	16.226	18.3083	12.96	9.34539	9.47741	8.9764
511	34.187	35.336	57.035	16.115	14.783	32.109	28.697	28.104	12.527	8.399	9.161	10.311	22.224	34.161	17.268	11.995	9.4	14.43	42.186	21.0023	16.1998	18.2463	12.8724	9.64168	9.55463	8.96612
512	33.915	34.365	57.526	16.254	14.532	32.106	28.682	28.43	12.249	8.645	9.196	10.074	22.199	34.37	17.714	12.112	9.129	14.352	41.9353	20.964	16.2127	18.3127	13.5038	9.68759	9.63996	9.07496
513	33.681	35.029	56.905	16.495	15.419	32.289	28.64	28.016	12.49	8.372	9.403	10.309	22.242	34.516	17.191	11.873	9.505	13.81	41.8717	21.401	16.205	18.1895	13.0367	9.44462	9.49016	9.14848
514	34.113	34.848	57.099	16.294	14.946	32.139	28.541	28.237	12.369	8.331	9.021	9.567	22.214	34.291	17.935	12.306	9.667	15.024	42.02	21.1263	16.011	18.5728	13.064	9.56104	9.68615	8.85333
515	33.777	34.8	57.553	16.311	14.375	32.025	28.627	28.459	12.379	8.799	9.118	10.669	22.23	34.641	17.458	12.275	9.261	14.529	42.0433	20.9037	16.3418	18.399	13.4415	9.67988	9.5364	9.11425
516	33.619	35.367	57.259	16.663	14.861	32.273	28.371	28.498	12.499	8.478	9.401	10.454	22.061	34.439	17.518	12.147	9.292	14.351	42.0817	21.2657	16.2835	18.3013	13.173	9.57512	9.50686	9.05342
517	33.78	33.947	56.963	15.854	14.589	31.994	28.424	28.408	12.579	8.398	9.517	10.469	22.092	34.451	17.058	11.922	9.653	14.516	41.5633	20.8123	16.2992	18.282	13.3368	9.70424	9.4857	9.01713
518	33.255	34.882	57.049	16.438	14.985	31.856	28.236	28.475	12.799	8.27	9.458	9.908	22.027	34.436	16.872	12.436	9.632	14.319	41.7287	21.093	16.191	18.287	13.2927	9.3493	9.53977	8.9629
519	33.287	35.055	57.201	16.079	14.91	32.074	28.276	28.331	12.147	8.644	9.293	10.283	22.025	34.095	16.903	12.122	9.803	14.51	41.8477	21.021	16.1623	18.243	13.3257	9.59001	9.47861	8.83199
520	33.73	34.863	56.764	16.122	15.275	31.34	28.344	28.206	12.76	8.866	9.361	10.228	21.837	34.149	16.997	12.17	9.599	14.532	41.7857	20.9123	16.2942	18.214	12.984	9.04055	9.37684	8.86382
521	33.252	35.248	56.67	16.224	14.986	31.797	27.967	28.232	12.742	8.591	9.268	10.434	21.917	34.438	17.659	12.213	9.485	15.077	41.7233	21.0023	16.2057	18.4648	12.9826	9.36893	9.32078	8.93207
522	33.391	35.552	56.87	16.177	15.053	31.568	28.145	28.512	12.9	8.802	9.251	10.254	21.887	34.157	17.61	12.286	9.502	14.318	41.9377	20.9327	16.3107	18.2933	12.9768	9.2276	9.41763	8.87937
523	32.874	34.786	56.424	15.899	14.697	31.404	28.075	28.435	12.917	8.746	9.389	10.132	21.788	34.072	17.451	11.901	9.614	14.263	41.3613	20.6667	16.2823	18.1815	13.0796	9.31821	9.38318	8.87975
524	33.278	35.393	56.698	16.039	14.73	31.75	27.949	28.529	12.574	8.961	9.365	9.99	21.909	34.197	17.166	12.146	9.562	14.574	41.7897	20.8397	16.228	18.259	12.9542	9.47127	9.39011	8.88958
525	33.297	34.236	56.757	16.066	14.204	31.551	27.977	28.658	12.751	8.829	9.282	9.735	21.929	34.015	17.534	12.007	8.997	14.204	41.43	20.607	16.2053	18.1143	13.2819	9.5234	9.48453	8.9826
526	33.76	35.178	56.617	16.07	15.084	31.548	27.982	28.792	13.264	9.144	9.108	10.526	21.809	34.066	17.086	12.183	9.016	14.108	41.8517	20.9007	16.4693	18.0447	12.8068	9.23403	9.35774	8.97937
527	33.287	34.382	56.241	15.973	14.927	31.372	28.002	28.298	13.03	8.948	9.491	10.408	21.895	33.749	17.241	12.628	9.55	14.207	41.3033	20.7573	16.3628	18.2117	12.948	9.20744	9.23784	8.69663
528	33.27	34.837	56.512	15.999	14.475	31.478	27.818	28.488	12.806	8.777	9.587	10.091	21.888	33.49	17.28	11.952	9.356	13.949	41.5397	20.6507	16.2612	17.9858	12.9901	9.40766	9.3126	8.75536
529	33.072	34.475	56.823	15.704	14.649	31.492	27.694	28.995	13.373	8.548	9.103	10.016	21.669	33.977	17.238	12.061	9.853	14.965	41.4567	20.615	16.2882	18.2938	13.3261	9.43452	9.49665	8.71373
530	33.071	33.958	56.481	16.33	14.489	31.759	27.668	28.937	12.362	9.053	9.252	10.384	21.793	33.938	16.751	12.126	9.308	14.289	41.17	20.8593	16.276	18.0342	13.2671	9.48416	9.39811	8.87452
531	32.819	33.951	56.289	15.786	15.065	31.248	27.783	28.564	12.771	8.534	9.243	10.307	21.69	34.195	17.137	11.645	9.643	14.173	41.0197	20.6997	16.2003	18.0805	13.2357	9.14224	9.38816	8.96071
532	32.263	33.269	55.684	15.662	14.769	31.02	27.686	28.911	12.206	8.413	8.968	9.782	21.648	34.187	17.008	11.636	9.601	14.226	40.4053	20.4837	15.9943	18.051	13.2413	9.13565	9.62628	8.96194
533	33.236	34.288	55.673	15.505	15.136	31.137	27.638	28.503	12.644	9.218	9.274	10.27	21.595	33.954	16.644	11.903	9.296	14.487	41.0657	20.5927	16.2578	17.9798	12.6613	9.13352	9.23796	8.88329
534	32.995	33.977	55.988	15.951	14.672	31.157	27.593	28.623	12.816	8.726	9.013	9.697	21.556	33.528	16.975	11.815	9.597	14.242	40.9867	20.5933	16.078	17.9522	13.0008	9.17073	9.43712	8.69239
535	32.072	33.093	55.937	16.036	14.044	30.93	27.436	28.392	12.557	8.759	8.889	9.79	21.575	33.477	16.92	11.491	8.869	14.074	40.3673	20.3367	15.9705	17.7343	13.4934	9.228	9.35687	8.87938
536	32.377	33.763	56.166	15.722	14.47	31.108	27.547	28.495	12.584	9.079	9.04	9.984	21.578	33.464	17.193	11.774	9.714	14.47	40.7687	20.4333	16.1215	18.0322	13.3525	9.2657	9.31207	8.63092
537	33.551	34.635	55.712	15.912	14.857	31.051	27.408	28.997	12.866	8.737	8.981	10.172	21.623	33.788	17.095	12.066	9.098	13.686	41.2993	20.6067	16.1935	17.8927	12.4935	9.06043	9.43022	8.90175
538	33.185	34.119	55.867	15.743	14.67	30.966	27.532	28.872	13.364	8.764	9.475	10.208	21.618	33.682	17.528	12.067	9.135	14	41.057	20.4597	16.3692	18.005	12.8343	9.11455	9.30901	8.82073
539	32.894	33.68	55.444	16.019	14.562	30.697	27.513	28.772	12.376	8.79	9.091	10.097	21.669	33.294	17.038	11.277	9.056	14.296	40.6727	20.426	16.1065	17.7717	12.7984	8.92473	9.41597	8.79652
540	32.025	33.822	55.291	15.407	14.453	30.552	27.328	28.584	12.822	9.11	8.633	9.758	21.562	33.009	17.258	11.286	9.073	14.184	40.3793	20.1373	16.0392	17.7287	12.9451	9.03197	9.35391	8.6879
541	32.668	33.238	55.457	15.453	14.585	30.8	27.22	28.712	12.995	8.83	9.165	10.083	21.561	33.686	17.318	11.943	9.004	13.295	40.4543	20.2793	16.1675	17.8012	12.9958	9.1215	9.26803	8.92985
542	31.957	33.033	55.24	15.348	14.632	30.409	27.154	28.7	13.003	8.786	8.947	9.985	21.424	33.319	16.277	12.074	9.417	13.359	40.0767	20.1297	16.0958	17.645	13.1428	8.90936	9.30156	8.70554
543	33.119	33.308	55.199	14.996	14.491	30.247	27.246	28.344	12.584	8.362	8.954	9.434	21.57	33.512	16.233	11.754	9.055	13.684	40.542	19.9113	15.8207	17.6347	12.6937	8.95451	9.39596	8.86952
544	31.647	33.092	54.545	14.917	13.999	30.202	27.136	28.564	12.267	8.794	8.953	9.749	21.331	33.427	16.667	11.574	8.977	13.84	39.7613	19.706	15.9105	17.636	12.8234	9.10138	9.34252	8.83271
545	32.144	33.018	55.043	15.125	14.603	30.229	27.193	28.439	12.498	8.728	9.383	9.663	21.427	33.09	16.359	11.823	8.728	13.899	40.0683	19.9857	15.984	17.5543	12.9758	8.87483	9.26389	8.73953
546	32.522	33.253	55.402	15.427	14.275	30.656	26.973	28.341	13.463	8.685	9.597	10.257	21.408	33.232	16.631	11.816	8.925	13.868	40.3923	20.1193	16.2193	17.6467	13.0039	9.14318	9.01493	8.74556
547	32.139	33.774	54.838	15.588	14.734	29.988	26.823	28.48	12.479	8.877	9.49	9.767	21.402	32.886	16.488	11.86	9.021	13.82	40.2503	20.1033	15.986	17.5795	12.6597	8.57102	9.13511	8.60449
548	31.459	32.702	55.583	15.333	14.326	30.225	26.945	28.534	12.721	8.785	8.738	9.685	21.39	33.259	16.642	11.639	9.211	13.77	39.9147	19.9613	15.9013	17.6518	13.5834	8.90285	9.29795	8.72981
549	31.637	33.041	54.938	15.573	14.765	30.412	26.951	28.833	12.642	9.103	8.717	9.945	21.344	33.357	16.605	11.63	9.302	14.18	39.872	20.25	16.0318	17.7363	13.0664	8.80982	9.30757	8.7106
550	31.75	33.007	54.824	14.926	14.099	30.357	26.821	28.766	12.5	9	8.476	10.118	21.263	33.075	15.871	11.608	8.953	13.354	39.8603	19.794	15.9468	17.354	12.9741	9.15717	9.30061	8.7661
551	31.79	32.907	55.32	14.911	14.45	30.355	26.63	29.131	12.731	8.693	8.808	10.006	21.3	33.279	16.058	11.664	9.2	13.506	40.0057	19.9053	15.9998	17.5012	13.2744	9.05261	9.35042	8.76809
552	32.006	32.334	54.724	15.533	14.187	30.328	26.79	29.042	12.924	8.892	8.96	9.797	21.373	32.884	16.397	11.698	8.926	13.327	39.688	20.016	16.0675	17.4342	13.0226	8.95578	9.32218	8.68848
553	31.272	32.706	54.88	15.468	14.427	30.456	26.771	28.818	12.291	8.893	9.129	9.789	21.182	33.348	16.578	11.559	9.05	14.001	39.6193	20.117	15.9485	17.6197	13.2356	8.96895	9.27742	8.76837
554	31.706	33.221	54.849	15.387	14.422	29.953	26.577	28.566	13.014	9.057	9.012	9.776	21.173	33.088	16.67	11.975	9.383	13.861	39.9253	19.9207	16.0003	17.6917	12.9465	8.70164	9.1046	8.5627
555	32.05	32.907	54.566	15.586	14.151	30.086	26.63	28.52	13.16	9.389	9.779	9.99	21.198	33.328	16.053	11.915	9.356	13.695	39.841	19.941	16.2447	17.5908	12.7594	8.81508	8.89921	8.69759
556	31.347	33.024	55.028	15.536	14.818	30.321	26.612	28.804	13.083	9.092	8.651	9.644	21.234	33.344	16.485	11.994	9.136	13.163	39.7997	20.225	15.981	17.5593	13.2148	8.75076	9.24328	8.77572
557	30.991	32.884	54.583	14.903	14.359	30.451	26.503	28.822	12.641	8.833	8.485	9.616	21.227	33.008	16.028	11.639	8.778	13.293	39.486	19.9043	15.8167	17.3288	13.1086	9.13773	9.32088	8.7693
558	32.028	32.396	54.336	15.354	14.391	30.049	26.521	28.659	12.499	9.414	8.959	10.225	21.045	32.856	16.269	11.794	9.533	14.045	39.5867	19.9313	16.0462	17.5903	12.7746	8.77538	9.04973	8.45942
559	31.933	32.468	55.091	15.394	13.866	30.195	26.5	28.969	12.344	9.546	9.273	9.535	21.24	33.068	15.654	11.794	9.077	13.746	39.8307	19.8183	16.0278	17.4298	13.2185	9.01887	9.17071	8.68707
560	31.184	32.332	54.494	15.286	14.053	30.181	26.405	28.898	12.87	9.054	9.065	9.687	21.022	32.685	16.369	12.015	8.861	13.377	39.3367	19.84	15.9965	17.3882	13.1392	8.97676	9.17185	8.55464
561	31.036	32.204	54.598	14.757	14.029	29.668	26.44	28.745	12.808	8.831	8.895	9.785	21.035	32.928	16.281	11.553	8.788	13.246	39.2793	19.4847	15.9173	17.3052	13.2792	8.82653	9.1878	8.73086
562	31.302	32.487	53.987	15.418	14.392	29.749	26.361	28.476	12.515	8.487	9.101	9.63	21.062	32.891	16.143	11.661	8.984	13.587	39.2587	19.853	15.7617	17.388	12.7689	8.58553	9.15886	8.64019
563	30.646	32.338	54.677	14.929	13.94	29.824	26.385	28.717	12.456	9.241	9.325	9.704	20.971	32.771	15.618	12.206	8.978	13.457	39.2203	19.5643	15.9713	17.3335	13.4126	8.89888	9.0775	8.5513
564	31.09	32.168	54.634	15.069	14.41	29.869	26.268	28.595	13.029	9.104	8.968	9.659	20.976	33.025	15.637	11.773	8.916	13.698	39.2973	19.7827	15.9372	17.3375	13.2929	8.74123	9.05628	8.68745
565	30.625	32.405	54.022	15.014	14.428	29.926	26.218	28.609	12.915	8.847	9.088	10.02	20.875	32.886	16.252	11.925	9.078	13.705	39.0173	19.7893	15.9495	17.4535	13.0249	8.7835	9.02882	8.5566
566	30.399	31.84	54.014	14.829	14.526	29.754	26.289	28.659	12.81	9.346	9.294	9.315	20.961	32.759	16.445	12.051	9.378	13.878	38.751	19.703	15.9522	17.5787	13.2378	8.70574	9.05772	8.42222
567	31.043	32.784	54.292	14.967	14.386	29.888	26.295	28.65	13.029	8.997	9.017	9.753	20.89	32.702	16.233	11.474	9.183	13.35	39.373	19.747	15.9568	17.3053	12.9495	8.78717	9.07364	8.56363
568	31.057	32.241	54.114	15.641	14.732	29.532	26.186	28.699	13.335	9.597	9.148	9.781	20.9	32.945	15.89	11.873	9.342	13.956	39.1373	19.9683	16.1243	17.4843	12.9837	8.29484	8.9292	8.52613
569	30.284	32.109	53.678	14.922	14.535	29.521	26.105	28.531	12.551	9.619	9.333	9.629	20.84	32.455	16.229	11.587	8.772	13.719	38.6903	19.6593	15.9613	17.267	13.0117	8.54265	8.90819	8.50335
570	31.178	32.388	54.391	15.029	14.328	29.531	26.091	28.676	13.275	8.928	8.959	9.955	20.873	32.747	16.281	11.918	9.315	13.718	39.319	19.6293	15.9807	17.4753	13.0667	8.58226	9.01181	8.45916
571	30.665	32.149	53.636	14.899	14.162	29.387	26.064	28.478	12.816	9.428	9.549	10.033	20.852	32.195	15.953	11.658	9.377	13.596	38.8167	19.4827	16.0613	17.2718	12.8554	8.58532	8.80354	8.30196
572	31.104	31.777	53.234	15.3	13.872	29.32	26.145	28.748	12.799	9.416	9.255	9.989	20.921	32.552	15.678	11.82	9.084	13.56	38.705	19.4973	16.0587	17.2692	12.587	8.53659	8.95136	8.48388
573	31.047	32.429	53.541	14.888	14.317	29.343	25.909	28.383	13.025	8.991	9.201	9.792	20.763	32.487	15.792	11.684	9.301	13.356	39.0057	19.516	15.8835	17.2305	12.6069	8.51522	8.87905	8.43755
574	30.763	31.667	53.533	15.054	13.841	29.084	25.996	28.872	13.154	9.042	8.744	9.738	20.806	32.6	15.954	11.705	8.665	13.265	38.6543	19.3263	15.9243	17.1658	12.8932	8.47212	9.0989	8.60505
575	30.179	31.984	53.799	15.309	14.222	29.339	25.878	28.642	13.075	9.155	8.846	9.454	20.781	32.594	16.543	11.459	8.846	13.683	38.654	19.6233	15.8417	17.3177	13.147	8.43155	9.01869	8.54711
576	30.622	32.008	53.944	15.197	14.159	29.559	25.839	28.452	12.784	9.152	9.053	9.953	20.776	32.401	15.891	11.982	9.409	13.486	38.858	19.6383	15.8722	17.3242	13.0832	8.60721	8.87496	8.33307
577	30.931	31.937	53.581	14.648	14.638	29.574	25.997	28.813	12.466	9.64	9.423	9.936	20.693	32.518	15.37	11.957	9.049	13.445	38.8163	19.62	16.0458	17.172	12.7965	8.62042	8.91143	8.46421
578	31.07	32.573	53.55	15.202	14.097	29.275	25.72	28.288	13.071	9.856	9.149	10.343	20.687	32.178	16.253	11.618	9.099	13.808	39.0643	19.5247	16.0712	17.2738	12.5674	8.46209	8.61056	8.3145
579	30.09	31.385	53.205	15.349	14.005	28.991	25.901	28.514	12.876	9.533	9.131	9.876	20.834	32.269	15.112	11.426	9.386	13.162	38.2267	19.4483	15.9718	17.0315	12.9878	8.29147	8.84187	8.42821
580	30.65	31.385	53.402	15.236	14.351	28.999	25.645	28.42	12.969	9.143	9.322	10.127	20.703	32.421	15.488	12.045	9.044	13.804	38.479	19.5287	15.9377	17.2508	12.9289	8.21348	8.74703	8.38442
581	30.806	32.088	53.572	14.625	14.371	29.064	25.602	28.449	12.848	8.961	9.548	10.321	20.566	32.04	15.396	11.505	8.971	13.383	38.822	19.3533	15.9548	16.9768	12.7899	8.41064	8.72383	8.35739
582	29.903	31.103	53.573	14.474	13.733	29.014	25.661	28.754	12.682	9.305	9.11	9.773	20.692	32.367	15.451	11.304	9.002	13.235	38.193	19.0737	15.8808	17.0085	13.333	8.61655	8.92182	8.51777
583	30.035	31.573	53.27	14.476	14.121	29.243	25.603	28.641	12.827	9.194	8.642	9.549	20.702	31.903	15.716	11.175	8.731	13.126	38.2927	19.28	15.7427	16.8922	12.9935	8.63004	8.98621	8.42256
584	30.128	31.499	53.33	15.059	13.718	29.012	25.595	28.575	13.161	9.507	9.018	9.684	20.602	32.029	15.749	11.877	9.459	13.6	38.319	19.263	15.9233	17.2193	13.018	8.46946	8.82064	8.18283
585	30.623	31.266	53.058	14.878	14	28.857	25.395	28.49	13.371	9.623	8.852	9.837	20.578	31.951	15.335	11.495	8.804	13.298	38.3157	19.245	15.928	16.9102	12.7713	8.3358	8.72799	8.3695
586	30.393	31.75	52.614	14.552	14.358	28.656	25.394	28.42	12.954	9.19	8.774	9.472	20.497	31.874	16.098	11.294	9.21	13.485	38.2523	19.1887	15.7007	17.0763	12.4561	8.19952	8.85946	8.24429
587	30.36	31.004	53.145	14.677	14.071	28.871	25.41	28.607	12.343	9.566	9.253	9.771	20.616	31.924	15.195	11.794	8.853	13.572	38.1697	19.2063	15.825	16.9923	12.973	8.37533	8.79083	8.29803
588	29.579	31.287	52.887	14.959	13.897	28.722	25.339	28.544	13.221	9.516	8.956	10.008	20.562	31.808	15.258	11.697	9.043	13.26	37.9177	19.1927	15.9307	16.938	12.9919	8.26971	8.71581	8.25105
589	29.858	31.041	53.19	14.685	14.568	28.82	25.396	28.017	12.891	9.692	9.204	9.653	20.533	32.211	15.558	11.773	8.94	13.874	38.0297	19.3577	15.8088	17.1482	13.1426	8.19483	8.58371	8.341
590	30.276	31.809	52.6	14.716	14.366	28.667	25.222	28.55	12.952	9.377	9.124	9.707	20.394	31.951	15.214	11.58	8.746	13.095	38.2283	19.2497	15.822	16.83	12.4698	8.15753	8.74521	8.37642
591	29.657	31.14	52.709	14.848	14.247	28.608	25.346	28.355	12.904	9.411	8.965	9.139	20.476	31.67	15.526	11.601	8.878	13.055	37.8353	19.2343	15.6867	16.8677	12.9023	8.12339	8.82008	8.24667
592	29.726	30.968	52.564	14.467	13.969	28.563	25.117	28.221	12.78	9.101	9.453	9.355	20.348	32.071	15.565	11.623	9.218	12.913	37.7527	18.9997	15.6712	16.9563	12.842	8.28583	8.6811	8.32547
593	29.906	31.166	52.691	14.47	14.519	28.365	25.281	28.333	13.097	9.285	9.266	9.773	20.552	32.194	15.351	11.599	8.719	13.279	37.921	19.118	15.8392	16.949	12.8067	8.00817	8.66863	8.45895
594	29.393	31.609	52.903	14.83	14.315	28.332	25.151	28.371	13.238	9.458	9.428	9.646	20.412	31.896	15.411	11.407	8.963	13.029	37.9683	19.159	15.882	16.853	12.9812	7.94822	8.61034	8.33753
595	29.997	30.838	52.686	14.212	14.114	28.295	25.095	28.156	13.139	9.53	9.237	9.559	20.379	31.672	15.395	11.651	8.914	12.863	37.8403	18.8737	15.786	16.8123	12.8636	8.15926	8.57302	8.24815
596	29.669	31.062	52.334	14.795	13.857	28.509	24.941	28.278	12.908	9.126	8.859	9.412	20.357	31.758	15.588	11.417	8.691	12.632	37.6883	19.0537	15.5873	16.7405	12.7026	8.20198	8.72785	8.36596
597	29.711	31.326	52.719	14.865	14.158	28.611	24.989	28.445	12.436	9.462	9.392	9.89	20.494	31.726	15.749	11.665	9.222	13.5	37.9187	19.2113	15.769	17.0593	12.8429	8.14802	8.62329	8.14637
598	30.069	31.403	52.595	14.573	14.289	28.512	25.027	28.413	13.165	10.049	9.441	9.715	20.324	31.414	15.205	11.246	8.754	13.268	38.0223	19.1247	15.9683	16.7018	12.6379	8.13091	8.50337	8.20407
599	29.762	30.961	52.277	14.842	13.761	28.425	24.792	28.183	12.826	9.534	8.876	9.908	20.252	31.685	15.401	11.539	8.659	13.112	37.6667	19.0093	15.6865	16.7747	12.6671	8.1721	8.54263	8.28237
600	29.687	30.435	52.618	14.617	14.175	28.33	24.866	28.188	12.598	9.61	9.01	9.679	20.264	31.63	15.572	11.46	8.646	13.358	37.58	19.0407	15.6585	16.8217	13.0287	8.04783	8.57525	8.24966
601	29.405	30.585	52.609	14.265	14.068	28.302	24.882	27.951	12.998	9.316	9.503	9.779	20.162	31.765	15.091	11.687	9.297	13.389	37.533	18.8783	15.7382	16.8985	13.0695	8.16173	8.43688	8.15094
602	29.319	29.874	52.537	14.343	14.421	28.376	24.856	28.503	12.887	8.867	8.984	9.257	20.236	31.639	15.179	11.264	8.565	12.56	37.2433	19.0467	15.559	16.5738	13.2476	8.07953	8.81873	8.37571
603	29.84	30.695	52.217	14.162	13.715	28.085	24.763	28.31	12.973	9.335	9.441	9.704	20.161	31.926	14.948	11.365	8.694	13.016	37.584	18.654	15.7543	16.685	12.6798	8.17054	8.53474	8.40247
604	29.482	30.557	51.83	14.654	14.063	28.259	24.719	28.145	12.677	9.569	8.891	9.569	20.07	31.823	15.021	11.651	9.249	13.075	37.2897	18.992	15.595	16.8148	12.6038	8.0309	8.56544	8.20917
605	29.178	30.834	52.038	14.599	13.771	28.052	24.791	27.899	13.277	9.749	9.593	9.632	20.204	31.662	15.209	11.667	8.901	13.401	37.35	18.8073	15.8235	16.8407	12.7471	8.01681	8.32793	8.18881
606	28.998	30.563	52.293	14.941	13.95	28.132	24.597	28.179	12.971	9.653	9.147	10.003	20.151	31.475	15.21	11.733	9.079	13.182	37.2847	19.0077	15.7583	16.805	13.0211	7.91742	8.41752	8.0931
607	29.499	30.27	51.974	14.549	13.954	27.991	24.508	27.865	12.894	9.276	8.944	9.765	20.188	31.503	15.033	11.386	8.749	12.772	37.2477	18.8313	15.542	16.6052	12.7592	7.93808	8.43122	8.25719
608	28.916	30.514	52.349	14.492	13.972	28.219	24.635	28.294	12.727	9.815	9.748	9.546	20.018	31.448	14.8	11.239	8.949	12.885	37.2597	18.8943	15.7942	16.5565	13.0921	8.07958	8.42805	8.20309
609	29.259	30.473	52.13	14.596	13.795	27.894	24.528	28.181	12.478	9.853	9.322	9.689	20.152	31.366	14.84	11.53	9.284	13.207	37.2873	18.7617	15.6752	16.7298	12.8685	7.91897	8.42716	8.05468
610	28.905	30.39	51.901	14.293	14.089	27.645	24.467	27.806	12.725	9.965	9.431	9.839	20.134	31.15	14.621	11.372	8.956	13.07	37.0653	18.6757	15.7055	16.5505	12.8695	7.76834	8.23174	8.07858
611	29.361	30.564	51.836	14.599	13.945	27.772	24.341	27.718	13.158	9.319	9.444	9.29	19.965	31.352	15.295	11.675	8.396	12.743	37.2537	18.772	15.545	16.571	12.643	7.80109	8.32298	8.21073
612	28.962	30.393	51.821	14.076	13.456	27.587	24.4	27.71	13.07	9.451	9.146	9.441	20.067	31.402	15.478	11.368	8.802	12.636	37.0587	18.373	15.5363	16.6255	12.8046	7.98558	8.34106	8.20086
613	28.655	29.652	51.855	13.815	13.326	27.787	24.545	27.701	12.496	9.673	9.098	9.405	20.114	31.314	14.884	11.59	8.734	12.482	36.7207	18.3093	15.4863	16.5197	13.1162	8.21154	8.38794	8.19375
614	28.691	29.402	51.788	13.774	13.966	27.979	24.351	28.108	13.313	9.756	9.035	9.814	20.063	31.286	14.768	11.496	8.785	12.937	36.627	18.573	15.7295	16.5558	13.1346	8.1464	8.35331	8.14319
615	28.691	29.588	51.485	14.032	13.637	27.683	24.25	27.796	12.689	9.538	8.902	9.345	20.15	31.139	14.936	10.985	8.815	12.373	36.588	18.4507	15.42	16.3997	12.909	7.99787	8.39739	8.20384
616	29.225	30.626	51.662	14.13	14.062	27.664	24.229	27.761	12.863	9.504	9.465	9.542	20.04	31.329	14.982	11.609	9.04	13.019	37.171	18.6187	15.5607	16.6698	12.5691	7.83356	8.26233	8.07778
617	28.748	29.981	51.847	14.412	13.94	27.869	24.24	27.715	12.87	9.586	9.066	9.518	19.917	31.316	14.971	11.724	8.68	12.784	36.8587	18.7403	15.4992	16.5653	12.9949	7.90918	8.30261	8.1397
618	28.936	30.392	51.705	14.191	13.813	27.529	24.141	27.588	13.059	10.017	9.105	9.619	19.935	31.047	14.4	11.483	8.93	12.862	37.011	18.511	15.5882	16.4428	12.7462	7.8121	8.15161	8.04382
619	28.484	30.463	51.754	13.935	14.169	27.721	24.123	27.828	12.609	10.219	9.478	9.527	19.947	30.756	14.891	11.536	9.01	13.096	36.9003	18.6083	15.6307	16.5393	12.9017	7.89267	8.17828	7.87431
620	28.85	29.237	51.447	14.048	13.807	27.734	24.142	27.837	13.335	9.845	9.217	9.681	19.848	31.336	15.223	11.343	8.551	12.87	36.5113	18.5297	15.6762	16.5285	12.9361	7.9721	8.20613	8.19634
621	28.713	29.926	51.662	14.009	13.764	27.607	24.173	27.779	13.206	9.793	9.157	9.89	19.975	31.161	14.773	11.681	8.981	13.197	36.767	18.46	15.6663	16.628	12.9137	7.92248	8.18983	8.00716
622	28.745	29.462	51.128	14.029	14.019	27.32	24.029	27.282	13.039	9.592	9.356	9.268	19.916	30.751	15.146	11.506	8.806	13.587	36.445	18.456	15.4277	16.6187	12.7209	7.67645	8.11265	7.86298
623	28.707	29.51	51.705	14.025	13.624	28.027	24.205	28.005	13.093	9.951	9.452	9.569	19.991	31.528	14.759	11.528	9.011	13.046	36.6407	18.5587	15.7125	16.6438	13.0523	8.20227	8.24889	8.1691
624	28.543	30.049	51.094	14.073	13.994	27.46	23.969	27.462	12.605	10.072	9.567	9.567	19.892	30.872	14.928	11.598	8.914	12.885	36.562	18.509	15.5403	16.5148	12.6076	7.75189	8.03802	7.93946
625	28.397	29.327	51.471	14.448	13.841	27.625	23.935	27.54	13.15	10.373	9.413	9.639	19.885	31.121	14.774	11.539	8.688	12.753	36.3983	18.638	15.675	16.46	13.0616	7.78889	7.98923	8.0979
626	28.364	29.528	51.144	14.079	13.122	27.287	23.965	27.463	13.491	9.317	9.267	9.583	19.743	30.993	15.232	11.486	8.784	12.679	36.3453	18.1627	15.5143	16.4862	12.8292	7.91638	8.13505	8.01808
627	27.918	29.8	51.129	13.536	13.22	27.406	24.032	27.656	13.632	9.92	9.221	9.3	19.842	30.902	14.977	11.339	8.649	12.275	36.2823	18.054	15.6268	16.3307	12.892	8.10061	8.16037	8.08528
628	28.216	29.474	51.079	13.268	13.622	27.445	23.73	27.355	13.526	9.779	8.963	9.415	19.806	31.253	14.788	11.509	8.776	12.717	36.2563	18.1117	15.4613	16.4748	12.8522	8.08484	8.05793	8.12883
629	28.604	29.385	51.071	13.793	14.119	27.525	23.902	27.38	13.252	10.075	9.521	9.65	19.772	31.133	14.904	11.252	8.592	12.359	36.3533	18.479	15.63	16.3353	12.7519	7.83576	7.95087	8.17852
630	28.05	29.658	50.99	13.757	13.489	27.241	23.839	27.331	13.464	9.737	8.993	9.112	19.909	30.933	15.159	11.156	8.675	13.211	36.2327	18.1623	15.4127	16.5072	12.8055	7.8635	8.12368	8.02916
631	27.933	28.941	50.904	13.368	13.627	27.085	23.822	27.509	13.462	9.806	8.968	9.188	19.742	30.859	14.757	11.532	8.669	12.281	35.926	18.0267	15.4592	16.3067	12.9811	7.84582	8.15531	8.04128
632	27.917	29.989	50.651	13.948	13.849	27.002	23.78	27.396	13.534	9.724	8.947	9.007	19.794	30.642	14.711	11.358	8.887	12.364	36.1857	18.2663	15.398	16.2927	12.5701	7.56547	8.15278	7.94095
633	27.643	28.979	50.614	13.786	13.867	27.181	23.681	27.237	13.36	10.159	9.254	9.606	19.617	30.979	14.46	11.244	8.883	12.379	35.7453	18.278	15.5495	16.2603	12.894	7.71033	7.8934	8.07219
634	28.285	28.913	50.52	13.47	13.779	27.181	23.693	27.08	13.471	10.06	9.212	9.571	19.832	30.775	14.917	11.416	8.853	12.413	35.906	18.1433	15.5145	16.3677	12.66	7.82837	7.86922	7.9788
635	27.118	28.957	50.688	13.959	13.759	27.299	23.604	27.084	13.509	9.942	9.023	8.963	19.811	30.824	14.415	11.341	8.563	12.31	35.5877	18.339	15.3542	16.2107	13.1096	7.76023	7.99094	8.08891
636	27.807	28.869	50.54	13.924	13.633	27.304	23.635	27.207	13.346	10.277	9.366	9.576	19.748	30.462	15.013	11.369	8.795	12.501	35.7387	18.287	15.5678	16.3147	12.8293	7.81031	7.84657	7.86356
637	27.496	29.062	49.939	13.889	13.778	27.249	23.58	27.195	13.476	9.875	8.971	9.383	19.695	31.032	14.342	11.239	8.379	12.092	35.499	18.3053	15.4133	16.1298	12.5299	7.74564	7.97242	8.22534
638	28.167	30.084	50.535	14.125	14.207	27.236	23.503	27.09	13.727	9.922	9.43	9.697	19.682	30.752	14.521	11.624	8.928	13.048	36.262	18.5227	15.5615	16.4258	12.3979	7.54608	7.78628	7.87598
639	28.424	29.433	50.353	13.626	14.105	26.953	23.499	27.28	13.383	10.385	9.59	9.855	19.61	30.651	14.706	11.517	9.06	13.025	36.07	18.228	15.6653	16.4282	12.3797	7.55987	7.74632	7.81498
640	27.206	28.147	50.31	13.896	13.714	27.083	23.393	27.595	13.689	9.956	9.258	9.399	19.632	31.016	14.488	11.131	8.63	12.185	35.221	18.231	15.5483	16.1803	13.0759	7.6666	7.98467	8.16506
641	27.912	29.29	50.266	13.652	14.074	27.019	23.579	27.122	13.493	10.041	9.352	9.578	19.777	30.607	14.584	11.934	9.002	12.778	35.8227	18.2483	15.5275	16.447	12.5273	7.59855	7.83624	7.80156
642	27.881	28.622	49.802	13.656	14.042	26.732	23.405	26.975	14.127	10.059	9.754	9.581	19.585	30.724	13.971	11.553	9.134	12.843	35.435	18.1433	15.6502	16.3017	12.4477	7.44051	7.66251	7.87532
643	27.524	28.741	50.45	13.757	13.85	26.988	23.414	27.299	13.753	9.725	9.364	9.147	19.721	31.049	14.601	11.395	8.662	12.468	35.5717	18.1983	15.4503	16.316	12.8994	7.61222	7.95295	8.11423
644	27.936	28.908	49.793	13.772	13.916	26.799	23.31	27.2	13.583	10.505	9.233	9.171	19.651	30.897	14.221	11.704	9.171	12.841	35.5457	18.1623	15.5003	16.4142	12.3481	7.47992	7.82103	7.90514
645	28.152	28.725	50.606	13.334	13.59	26.989	23.35	27.454	14.233	9.906	9.128	9.415	19.603	30.895	14.474	11.267	8.596	12.444	35.8277	17.971	15.581	16.2132	12.8016	7.81087	7.93737	8.08411
646	27.238	28.203	50.006	13.162	13.45	26.658	23.242	26.829	14.342	10.01	8.994	9.446	19.603	30.735	14.373	11.54	8.419	12.567	35.149	17.7567	15.4772	16.2062	12.8756	7.71013	7.7297	8.02051
647	27.633	29.119	49.93	13.9	13.733	26.697	23.333	26.971	14.158	10.355	9.263	9.346	19.674	30.558	14.445	11.571	8.577	12.798	35.5607	18.11	15.571	16.2705	12.4664	7.43703	7.7195	7.90421
648	27.145	28.989	49.972	13.672	14.102	26.607	23.241	27.033	14.312	10.068	9.691	9.586	19.668	30.888	14.981	11.755	9.031	12.425	35.3687	18.127	15.6552	16.458	12.6804	7.34704	7.64757	7.92785
649	27.305	27.49	49.836	13.375	13.756	26.764	23.109	27.02	14.591	10.24	9.417	9.355	19.612	30.548	14.242	11.35	8.79	12.584	34.877	17.965	15.622	16.1877	12.9552	7.62254	7.66519	7.91007
650	28.118	28.726	49.651	13.865	13.76	26.738	23.099	27.269	14.342	10.417	9.547	9.348	19.575	30.63	14.543	11.476	8.751	12.503	35.4983	18.121	15.6703	16.2463	12.2603	7.46273	7.70121	7.92237
651	27.152	27.882	49.609	13.925	13.331	26.58	23.013	26.998	14.81	10.163	9.423	9.35	19.527	30.75	14.346	11.226	8.974	12.56	34.881	17.9453	15.6262	16.2305	12.76	7.48374	7.64547	7.95498
652	26.611	28.473	49.518	13.253	13.264	26.703	23.106	26.945	14.89	10.188	9.257	9.1	19.626	30.65	14.377	11.328	8.828	12.709	34.8673	17.74	15.581	16.253	12.722	7.76219	7.71135	7.92611
653	27.675	28.767	49.877	13.445	13.71	26.847	22.941	27.05	14.764	10.455	9.723	9.448	19.577	30.442	14.263	11.674	8.992	12.66	35.4397	18.0007	15.7302	16.268	12.515	7.6623	7.54251	7.78376
654	26.645	27.961	49.702	13.654	13.591	26.757	23.053	27.127	14.399	9.738	9.075	9.454	19.57	30.184	14.293	11.212	8.548	11.991	34.7693	18.0007	15.4743	15.9663	12.9488	7.58327	7.80357	7.89135
655	27.408	28.295	49.889	13.893	14.3	26.553	22.875	27.036	14.287	10.753	9.805	9.856	19.534	30.49	14.563	11.711	9.112	13.098	35.1973	18.2487	15.7687	16.418	12.7311	7.19464	7.42065	7.71657
656	27.376	28.435	49.765	14.109	13.78	27.067	23.033	27.623	14.654	10.325	9.07	9.461	19.643	30.303	14.902	11.662	8.947	13.05	35.192	18.3187	15.6943	16.4178	12.6317	7.57806	7.85872	7.68467
657	26.767	27.756	49.316	13.926	13.501	26.817	22.977	27.338	14.743	10.067	9.355	9.44	19.661	30.555	14.405	11.002	8.876	12.193	34.613	18.0813	15.6533	16.1153	12.7428	7.56829	7.75213	7.97421
658	26.386	27.937	49.945	13.416	13.278	26.586	22.959	27.046	15.041	10.474	9.741	9.454	19.651	30.55	14.361	11.196	8.742	12.535	34.756	17.76	15.7858	16.1725	13.1769	7.64385	7.53191	7.94107
659	27.097	28.227	49.438	13.346	13.346	26.606	22.878	27.009	15.24	10.511	9.796	9.253	19.65	30.495	14.216	11.172	8.496	12.163	34.9207	17.766	15.7812	16.032	12.5851	7.65566	7.52245	8.01182
660	25.955	26.947	49.594	13.895	13.273	26.56	22.899	27.164	15.11	10.129	9.39	9.264	19.617	30.587	14.502	11.215	8.557	12.344	34.1653	17.9093	15.6593	16.137	13.3708	7.49815	7.69235	7.99569
661	26.886	27.543	49.53	13.131	13.863	26.407	22.822	27.112	14.719	10.268	9.138	9.149	19.674	30.412	13.795	11.42	8.557	12.539	34.653	17.8003	15.5347	16.0662	12.888	7.46257	7.71021	7.9296
662	26.953	28.509	49.378	13.429	13.951	26.719	22.726	26.848	15.34	10.263	9.464	9.496	19.53	30.122	14.155	11.382	8.792	12.192	34.9467	18.033	15.6895	16.0288	12.5221	7.52682	7.49279	7.78554
663	26.493	27.743	49.386	13.494	13.645	26.635	22.697	27.107	15.589	10.175	9.862	9.312	19.522	30.733	14.406	11.834	8.795	12.643	34.5407	17.9247	15.7903	16.3222	12.8716	7.54375	7.54262	7.89837
664	27.229	28.459	48.995	13.707	13.99	26.181	22.802	27.034	15.405	10.974	9.581	9.57	19.618	30.227	14.442	11.432	9.026	12.695	34.8943	17.9593	15.8943	16.24	12.227	7.12158	7.43118	7.72018
665	26.648	27.555	48.762	13.046	13.581	26.206	22.659	26.912	16.105	10.207	9.432	9.225	19.653	30.463	14.216	11.026	8.537	12.751	34.3217	17.611	15.7567	16.1077	12.5139	7.44829	7.55868	7.95775
666	26.746	27.283	49.04	13.51	14.101	26.64	22.647	27.028	15.633	10.455	9.886	9.536	19.696	30.403	13.731	11.375	9.021	12.689	34.3563	18.0837	15.8642	16.1525	12.7193	7.41589	7.4261	7.83805
667	26.642	27.846	48.617	13.102	13.846	26.464	22.597	26.833	15.59	10.727	9.216	9.326	19.606	30.331	14.427	11.143	8.549	12.412	34.3683	17.804	15.7148	16.078	12.3544	7.509	7.46892	7.90949
668	26.26	27.618	48.955	13.508	14.023	26.669	22.646	27.029	15.257	10.473	9.542	9.663	19.588	30.572	14.248	11.328	8.786	12.949	34.2777	18.0667	15.7683	16.2452	12.7291	7.45429	7.46256	7.88801
669	26.938	27.787	48.937	13.772	14.048	26.585	22.669	26.962	15.791	10.806	9.825	9.615	19.716	30.355	14.23	11.986	9.505	12.945	34.554	18.135	15.9447	16.4562	12.4633	7.31922	7.35585	7.60775
670	26.766	28.316	48.587	13.254	13.879	26.326	22.67	26.952	16.851	10.476	9.673	9.461	19.56	30.209	14.184	11.57	9.037	12.563	34.5563	17.8197	16.0138	16.1872	12.1756	7.37333	7.46274	7.71464
671	26.443	27.57	48.737	13.436	13.999	26.222	22.638	26.987	15.96	10.843	9.739	9.231	19.651	30.187	13.669	11.598	8.724	12.489	34.25	17.8857	15.8997	16.053	12.5588	7.22496	7.43414	7.80593
672	26.584	27.475	48.877	14.228	13.754	26.239	22.498	27.136	15.964	10.947	9.594	9.662	19.545	30.376	14.257	11.601	8.906	12.424	34.312	18.0737	15.9668	16.1848	12.6215	7.07536	7.38876	7.80427
673	27.427	27.713	48.627	13.255	14.503	26.124	22.396	27.271	16.363	10.749	9.512	9.799	19.514	30.284	14.448	11.641	8.711	12.283	34.589	17.9607	16.015	16.1468	12.1581	7.09714	7.43228	7.80521
674	26.31	27.707	48.795	13.779	14.122	26.261	22.464	26.711	16.62	10.597	10.128	9.705	19.748	30.18	14.527	11.421	8.686	12.371	34.2707	18.054	16.0375	16.1555	12.5978	7.10954	7.21366	7.80738
675	26.731	27.768	48.733	13.525	13.696	26.436	22.493	27.368	16.297	11.027	9.579	9.385	19.622	30.379	13.973	11.495	8.758	12.077	34.4107	17.8857	16.0248	16.0507	12.4143	7.4053	7.49924	7.90062
676	26.883	27.948	48.312	13.702	14.281	26.447	22.5	27.101	16.837	11.04	10.091	9.466	19.511	30.366	14.269	11.538	8.529	12.857	34.381	18.1433	16.1725	16.1783	12.0763	7.19701	7.32414	7.83733
677	25.981	27.389	48.43	13.493	13.608	26.092	22.41	27.107	17.098	10.699	9.303	9.349	19.579	30.118	13.918	11.415	8.772	12.188	33.9333	17.731	15.9943	15.9983	12.5742	7.24107	7.52124	7.80076
678	26.763	27.223	48.32	13.324	13.393	25.796	22.409	26.766	16.971	11.05	9.683	9.178	19.522	30.242	13.691	11.613	8.982	12.428	34.102	17.5043	16.0095	16.0797	12.3153	7.18088	7.33309	7.76904
679	26.214	27.312	48.241	13.79	13.615	26.187	22.414	26.791	17.291	10.404	9.47	9.423	19.601	30.366	14.326	11.7	8.594	12.634	33.9223	17.864	15.9655	16.2035	12.4125	7.20846	7.43583	7.83035
680	25.729	27.439	48.347	13.737	13.561	25.632	22.323	26.801	17.04	10.844	9.826	9.697	19.61	30.188	14.323	11.688	9.017	12.742	33.8383	17.6433	16.0885	16.2613	12.5939	6.91895	7.24026	7.67729
681	26.353	27.339	48.105	13.723	13.651	26.23	22.474	27.351	17.041	10.802	9.544	9.295	19.583	30.262	14.457	11.064	9.057	12.073	33.9323	17.868	16.0845	16.0827	12.2838	7.24179	7.55586	7.83036
682	25.971	26.856	47.99	13.682	14.06	26.042	22.241	26.949	16.762	10.837	9.963	9.656	19.58	30.584	13.528	11.616	8.618	12.419	33.6057	17.928	16.068	16.0575	12.4651	7.02947	7.24889	7.97668
683	26.515	27.129	48.052	13.071	13.818	26.002	22.271	26.835	16.528	10.637	10.047	9.529	19.622	30.373	14.177	11.685	8.878	12.071	33.8987	17.6303	15.9745	16.1343	12.261	7.25969	7.25357	7.8447
684	26.279	26.937	48.454	13.187	13.582	26.154	22.208	26.961	17.57	11.131	9.923	9.529	19.61	30.348	14.287	11.394	9.254	12.661	33.89	17.641	16.2203	16.259	12.6171	7.37512	7.25765	7.73695
685	25.914	27.097	47.967	13.506	13.786	25.874	22.292	26.798	17.425	10.812	9.508	9.739	19.625	29.634	14	11.775	8.801	12.396	33.6593	17.722	16.0957	16.0385	12.4049	7.06123	7.29963	7.55887
686	26.169	26.833	48.269	13.152	13.829	26.384	22.225	27.316	18.073	10.851	9.621	9.683	19.598	30.296	14.767	11.639	8.551	12.869	33.757	17.7883	16.2948	16.2867	12.5721	7.45176	7.45234	7.7802
687	25.188	25.94	47.99	13.243	13.679	26.426	22.088	27.203	17.894	10.66	9.386	9.496	19.584	30.292	13.902	11.23	8.792	12.285	33.0393	17.7827	16.1212	16.0142	12.9531	7.48852	7.49176	7.87421
688	25.36	26.456	48.372	13.16	13.997	26.361	22.113	27.334	17.596	10.76	9.725	9.011	19.497	30.333	14.016	11.511	8.691	12.828	33.396	17.8393	16.0898	16.146	12.9812	7.39184	7.53666	7.81161
689	26.362	27.7	47.948	13.225	13.762	26.145	22.12	27.195	17.773	11.275	9.85	9.375	19.617	30.188	14.153	11.312	8.838	12.338	34.0033	17.7107	16.2647	16.0743	12.095	7.30928	7.34227	7.8031
690	26.152	26.881	48.093	12.749	13.843	26.259	22.088	27.114	18.385	11.314	9.879	9.275	19.688	29.886	13.869	11.83	8.809	11.981	33.7087	17.617	16.3425	16.0105	12.4625	7.50415	7.35146	7.69694
691	25.938	26.744	48.112	12.906	13.75	25.849	22.089	27.142	17.949	10.891	9.532	9.381	19.647	30.067	13.838	11.471	8.487	11.999	33.598	17.5017	16.164	15.9182	12.576	7.24131	7.43781	7.8585
692	25.779	26.964	48.233	13.276	14.151	26.006	22.095	27.4	17.611	10.984	10.07	9.838	19.656	30.04	14.229	11.795	8.383	12.143	33.6587	17.811	16.333	16.041	12.6356	7.11055	7.31211	7.79989
693	25.305	27.148	47.452	13.47	13.924	25.981	22.24	27.137	17.794	10.927	9.901	9.525	19.577	30.132	14.062	11.381	8.604	12.717	33.3017	17.7917	16.254	16.0788	12.2891	7.0958	7.35745	7.78513
694	25.171	26.721	48.041	13.005	13.716	26.174	21.837	27.179	18.124	10.797	10.048	9.195	19.652	30.467	13.961	11.236	8.743	12.347	33.311	17.6317	16.1967	16.0677	12.7801	7.40641	7.37734	7.94312
695	26.283	26.856	47.418	13.528	14.128	26.069	21.992	27.041	18.179	11.435	10.063	9.45	19.617	29.846	14.613	12.142	9.423	12.808	33.519	17.9083	16.36	16.4082	12.0403	7.07371	7.22174	7.40336
696	25.425	26.701	47.433	13.437	14.407	25.865	21.952	26.627	18.122	11.31	9.875	9.569	19.658	30.322	13.889	11.457	8.945	12.44	33.1863	17.903	16.2425	16.1185	12.3545	6.91233	7.11869	7.82251
697	25.992	26.866	47.63	13.043	14.334	26.262	21.9	26.821	17.327	11.577	10.044	9.345	19.665	30.16	14.288	11.806	8.969	12.034	33.496	17.8797	16.169	16.1537	12.2482	7.28796	7.11083	7.73926
698	25.35	26.617	47.447	12.884	13.585	26.127	21.925	26.992	17.932	11.55	9.973	9.326	19.619	30.267	14.435	10.97	8.652	12.156	33.138	17.532	16.283	16.0165	12.4081	7.45174	7.20904	7.91407
699	25.176	26.45	47.278	13.117	13.984	25.761	21.895	27.129	17.951	11.179	9.472	9.16	19.506	30.061	14.388	11.314	8.726	12.154	32.968	17.6207	16.131	16.0248	12.4092	7.06305	7.41554	7.77509
700	24.892	26.463	48.018	12.31	13.407	26.056	21.954	27.234	18.093	10.374	9.724	9.602	19.705	30.297	13.704	11.471	8.627	12.053	33.1243	17.2577	16.1635	15.9762	12.9222	7.6393	7.4545	7.92277
701	24.766	26.17	47.451	13.071	13.36	26.239	21.979	27.086	18.695	10.622	9.494	9.246	19.632	30.06	14.161	11.406	8.916	11.957	32.7957	17.5567	16.187	16.022	12.7113	7.52051	7.51756	7.7703
702	25.193	26.791	47.013	13.664	13.926	25.893	21.67	27.002	18.035	11.694	10.275	9.917	19.756	29.986	13.596	11.212	8.926	12.879	32.999	17.8277	16.4322	16.0592	12.1628	6.98601	6.99333	7.72245
703	25.302	26.245	47.217	12.855	14.037	26.073	21.804	26.749	18.345	11.294	9.972	9.409	19.553	30.036	14.074	11.871	9.072	11.997	32.9213	17.655	16.2622	16.1005	12.3894	7.31412	7.15875	7.6727
704	25.204	26.324	47.27	13.3	13.203	26.18	21.819	26.91	17.806	11.074	9.913	8.904	19.601	30.121	14.268	11.226	9.277	12.36	32.9327	17.561	16.071	16.1422	12.4291	7.46443	7.31834	7.70049
705	24.919	26.094	46.885	13.479	13.875	26.04	21.74	27.148	18.783	11.143	9.996	9.613	19.639	29.716	14.54	11.397	8.948	12.219	32.6327	17.798	16.4038	16.0765	12.3569	7.14053	7.2722	7.59844
706	25.474	26.238	47.402	12.949	13.784	26.296	21.659	27.138	18.403	11.18	10.345	9.369	19.658	30.179	14.572	11.647	8.732	12.638	33.038	17.6763	16.349	16.2377	12.4455	7.47652	7.21532	7.73564
707	25.567	26.578	46.874	13.549	14.372	26.168	21.59	26.84	18.47	11.455	10.111	9.793	19.472	29.938	14.09	11.613	8.941	12.336	33.0063	18.0297	16.3765	16.065	12.0204	7.06001	7.04086	7.64782
708	25.061	26.056	46.714	13.561	13.431	25.418	21.506	26.686	18.231	10.78	9.526	9.367	19.59	29.897	13.702	11.5	8.776	12.581	32.6103	17.47	16.016	16.0077	12.2243	6.88348	7.24762	7.68662
709	25.86	26.121	46.644	13.481	13.714	26.09	21.626	26.889	18.761	11.363	9.911	9.911	19.554	30.299	14.476	11.9	9.229	12.074	32.875	17.7617	16.4102	16.2553	11.925	7.21349	7.10619	7.70835
710	24.971	25.716	47.288	12.865	13.406	25.837	21.763	27.228	19.046	10.687	9.898	9.225	19.57	30.195	14.465	11.228	8.304	12.135	32.6583	17.3693	16.3078	15.9828	12.6751	7.3382	7.47466	7.91879
711	25.404	26.597	47.311	12.891	13.633	26.138	21.58	27.014	18.334	11.712	10.287	9.734	19.491	30.305	13.42	12.105	9.166	12.207	33.104	17.554	16.4435	16.1157	12.3181	7.44321	7.02851	7.74155
712	24.629	25.862	46.924	12.784	14.047	26.094	21.6	26.958	18.778	10.627	9.849	9.497	19.507	30.146	14.002	11.581	8.205	11.801	32.4717	17.6417	16.2182	15.8737	12.5313	7.34713	7.31932	7.92749
713	24.658	25.892	46.827	12.731	14.485	25.719	21.469	26.862	18.932	11.02	10.024	8.611	19.52	30.111	13.579	11.63	8.358	11.719	32.459	17.645	16.153	15.8195	12.4583	7.04707	7.3683	7.91202
714	25.74	26.702	46.391	13.133	14.005	25.67	21.552	26.744	17.797	11.585	10.263	9.692	19.495	29.792	13.812	11.36	8.896	12.412	32.9443	17.6027	16.2722	15.9612	11.6551	7.00011	6.94607	7.64307
715	25.513	26.127	47.038	13.648	14.637	26.111	21.438	27.113	18.11	10.981	9.933	9.978	19.539	29.981	13.459	11.76	9.154	12.06	32.8927	18.132	16.2588	15.9922	12.2541	6.92769	7.1468	7.67878
716	24.794	26.398	46.691	13.161	14.166	26.243	21.49	26.492	17.991	11.423	10.403	9.444	19.511	30.207	13.585	11.752	8.934	13.042	32.6277	17.8567	16.2072	16.1718	12.2056	7.28014	6.91643	7.70123
717	25.423	25.577	46.547	12.496	14.358	25.828	21.409	26.574	18.474	10.803	10.234	9.988	19.452	30.166	13.828	11.696	8.864	11.958	32.5157	17.5607	16.247	15.994	12.1517	7.22	6.97454	7.78581
718	25.027	25.891	46.963	12.838	13.424	26.097	21.447	26.906	18.266	11.48	10.353	9.026	19.567	30.136	14.173	11.449	9.196	12.297	32.627	17.453	16.2463	16.1363	12.4229	7.49166	7.13214	7.70058
719	24.727	26.146	46.439	12.66	13.658	26.136	21.483	26.912	18.583	10.664	10.041	9.261	19.492	30.214	14.166	11.88	8.45	11.974	32.4373	17.4847	16.1573	16.0293	12.1465	7.50887	7.28087	7.84571
720	25.418	25.924	46.231	14.114	13.941	26.077	21.372	26.577	18.008	12.125	10.72	10.373	19.548	30.195	13.944	11.904	9.125	12.441	32.5243	18.044	16.5292	16.1928	11.873	6.95732	6.59758	7.67854
721	25.167	25.39	46.86	13.411	13.952	25.817	21.247	26.984	18.288	11.39	9.465	9.195	19.495	30.346	13.576	11.486	9.084	11.899	32.4723	17.7267	16.0948	15.981	12.4606	7.01165	7.26122	7.8603
722	24.968	25.356	46.404	13.131	14.586	25.936	21.365	26.302	17.833	10.754	10.382	9.395	19.49	29.967	13.547	12.451	8.571	12.338	32.2427	17.8843	16.0052	16.0607	12.2656	7.0108	6.94237	7.67396
723	24.811	25.999	46.778	12.454	13.738	25.805	21.501	26.716	17.646	10.881	10.047	9.324	19.436	30.026	14.276	11.587	8.57	12.004	32.5293	17.3323	16.0192	15.9832	12.354	7.36558	7.12758	7.77371
724	25.016	25.912	46.48	12.622	13.795	25.723	21.181	26.668	18.046	11.075	10.179	9.202	19.476	30.062	13.583	11.384	8.583	12.134	32.4693	17.38	16.0585	15.8703	12.1419	7.24902	7.05928	7.83363
725	25.412	25.88	46.441	12.763	13.57	25.748	21.489	26.36	17.722	11.47	10.275	9.111	19.507	30.41	13.615	11.422	8.998	12.407	32.5777	17.3603	16.0712	16.0598	12.0083	7.27513	6.94476	7.85506
726	24.701	25.089	46.69	12.989	13.733	25.882	21.239	26.935	17.754	11.307	9.948	9.495	19.519	30.077	13.475	11.453	8.153	12.439	32.16	17.5347	16.113	15.8527	12.5848	7.23857	7.08502	7.89585
727	24.19	25.34	46.111	13.448	13.869	25.98	21.115	26.918	18.13	11.309	10.531	9.624	19.506	30.046	13.741	11.811	8.96	12.541	31.8803	17.7657	16.2712	16.1008	12.3375	7.11694	6.95745	7.66418
728	23.93	25.972	46.091	13.46	14.162	25.233	21.324	26.434	18.731	11.042	10.193	9.801	19.542	29.528	13.793	11.663	8.968	12.202	31.9977	17.6183	16.2542	15.9493	12.2478	6.60383	6.94283	7.52451
729	24.505	25.413	45.808	12.368	13.821	25.682	21.166	26.104	17.702	11.658	9.957	9.908	19.515	29.641	13.628	11.41	8.421	12.087	31.9087	17.2903	16.0825	15.7837	12.0457	7.30362	6.69504	7.7149
730	24.345	25.943	46.085	12.667	13.869	25.757	21.109	26.564	17.856	11.448	10.756	9.603	19.474	30.064	13.568	11.761	8.549	12.057	32.1243	17.431	16.2227	15.9122	12.1167	7.23553	6.78217	7.80726
731	23.972	25.685	46.842	12.174	14.181	26.079	21.218	26.948	17.945	11.227	9.987	10.003	19.49	30.202	13.719	11.537	8.959	12.157	32.1663	17.478	16.2213	16.0107	12.7383	7.51598	7.00681	7.78899
732	24.438	25.399	45.915	13.425	14.076	25.802	21.136	26.361	17.463	10.932	9.596	9.645	19.366	30.068	13.486	11.502	8.602	11.926	31.9173	17.7677	15.8555	15.825	12.1319	6.96555	6.96887	7.83498
733	24.817	25.191	46.333	12.726	13.867	25.605	20.998	26.691	17.699	11.569	10.461	9.337	19.399	29.929	13.692	11.797	8.734	12.27	32.1137	17.3993	16.1258	15.9702	12.3157	7.12918	6.88155	7.68459
734	24.18	25	46.175	12.765	14.116	25.449	21.081	26.51	17.817	11.897	10.547	9.325	19.357	29.823	13.512	11.833	8.746	12.09	31.785	17.4433	16.1962	15.8935	12.4688	6.96594	6.7893	7.66472
735	24.552	25.073	46.084	12.732	13.776	25.864	21.134	26.43	18.124	11.118	10.238	9.325	19.543	29.712	13.19	11.803	8.298	13.172	31.903	17.4573	16.0615	15.953	12.2839	7.29908	6.94582	7.66013
736	24.016	25.568	46.462	12.792	13.805	25.545	21.062	26.75	16.74	11.828	10.407	9.296	19.252	30.432	13.74	12.008	8.904	12.776	32.0153	17.3807	16.0138	16.1853	12.5352	7.08864	6.86096	7.75168
737	24.109	25.676	45.803	12.78	14.281	25.7	20.96	26.117	17.569	11.609	10.571	9.861	19.286	30.018	13.892	11.577	8.79	12.137	31.8627	17.587	16.1145	15.95	12.0981	7.06603	6.56933	7.7227
738	23.099	25.017	46.321	12.5	13.724	25.742	20.97	26.568	17.253	11.045	9.739	9.573	19.237	29.97	13.736	12.136	8.433	11.723	31.479	17.322	15.858	15.8725	12.8893	7.31757	6.96981	7.7608
739	23.909	24.875	46.042	12.912	13.745	26.024	20.843	26.788	17.587	11.013	9.797	9.364	19.282	30.212	13.844	11.896	8.58	11.763	31.6087	17.5603	15.8987	15.9295	12.509	7.34157	7.06649	7.83865
740	23.564	25.445	45.695	12.316	14.061	25.751	21.123	26.544	17.718	11.045	10.469	9.758	19.405	30.12	13.118	11.926	8.386	12.248	31.568	17.376	16.1095	15.8672	12.2704	7.30525	6.847	7.84623
741	24.562	25.31	45.882	12.74	14.441	25.666	20.919	26.696	17.241	10.937	10.206	9.525	19.206	30.075	13.609	11.584	8.505	12.026	31.918	17.6157	15.9207	15.8342	12.099	7.02348	6.94598	7.81543
742	24.85	25.398	45.886	12.981	13.751	25.954	20.87	26.613	17.476	11.544	10.535	8.859	19.319	30.549	13.648	12.075	8.928	12.451	32.0447	17.562	15.9828	16.1617	11.9901	7.27788	6.9173	7.82405
743	24.428	24.858	45.894	12.197	13.728	25.362	20.793	26.586	17.819	11.285	10.029	9.599	19.172	30.245	13.891	11.818	7.965	12.317	31.7267	17.0957	16.0185	15.9013	12.2712	7.19967	6.88767	7.91184
744	23.461	25.151	45.737	12.722	13.808	25.878	20.884	26.278	17.549	11.067	10.291	9.274	19.172	30.286	13.092	11.033	8.912	12.101	31.4497	17.4693	15.8905	15.766	12.402	7.30234	6.84083	7.90433
745	24.485	25.533	45.656	13.116	13.971	25.788	20.894	26.765	17.147	11.666	10.618	9.762	19.229	30.221	13.541	11.666	8.348	12.103	31.8913	17.625	16.142	15.8513	11.9321	7.08228	6.74823	7.88797
746	23.376	25.071	45.805	12.8	14.371	25.739	20.874	26.491	17.497	11.229	10.293	9.181	19.332	30.051	13.238	11.882	8.616	12.376	31.4173	17.6367	15.9275	15.9158	12.4889	7.06066	6.89721	7.75543
747	23.963	25.545	45.525	13.686	14.002	25.738	20.713	26.261	16.866	11.613	10.928	9.557	19.242	30.348	13.574	11.806	8.872	12.684	31.6777	17.8087	15.9897	16.0877	12.0182	6.86882	6.55337	7.76671
748	23.95	25.226	45.696	13.038	14.455	25.752	20.922	26.626	16.598	11.444	10.469	9.938	19.236	30.168	13.293	11.833	8.911	11.674	31.624	17.7483	15.9995	15.8525	12.2034	6.96749	6.71703	7.80683
749	24.095	25.127	45.953	13.106	13.794	25.846	20.91	26.979	17.264	11.459	10.626	10.301	19.197	30.288	13.987	11.839	8.726	12.147	31.725	17.582	16.2565	16.0307	12.3326	7.1651	6.75024	7.79083
750	23.692	24.901	45.538	13.425	14.255	25.698	20.81	26.381	15.89	11.259	10.087	9.13	19.166	30.142	13.495	12.035	9.365	11.891	31.377	17.7927	15.5928	16.0157	12.2787	6.85879	6.84918	7.65404
751	24.142	25.555	45.603	13.52	14.383	25.921	20.884	26.569	17.005	11.613	11.337	9.76	19.178	30.193	13.967	12.365	9.301	12.126	31.7667	17.9413	16.1947	16.1883	12.0034	6.92405	6.57673	7.59683
752	23.578	25.7	45.977	12.822	13.938	25.804	20.71	26.051	17.922	11.03	10.591	9.566	19.255	30.291	14.267	12.018	8.341	12.091	31.7517	17.5213	15.9783	16.0438	12.3651	7.19467	6.66712	7.84368
753	23.642	24.903	45.732	12.998	14.537	26.128	20.653	26.495	16.698	11.775	10.662	9.531	19.182	30.572	13.963	11.941	8.492	12.72	31.4257	17.8877	15.969	16.145	12.4057	7.17771	6.64033	7.87522
754	23.763	24.856	45.744	12.382	13.197	25.693	20.716	26.782	17.031	11.158	10.547	8.916	19.179	30.683	13.992	11.381	8.415	11.826	31.4543	17.0907	15.8583	15.9127	12.3873	7.46098	6.96847	8.07431
755	23.676	24.836	45.032	12.802	14.299	25.96	20.962	26.328	17.57	10.706	10.818	9.657	19.086	30.095	13.368	11.398	8.46	12.184	31.1813	17.687	16.0068	15.7652	12.009	7.20362	6.7656	7.84067
756	23.525	24.128	45.542	13.082	14.307	25.484	20.588	26.561	16.359	11.329	10.782	9.595	19.05	29.937	12.73	11.687	8.992	12.064	31.065	17.6243	15.869	15.7433	12.5411	6.83417	6.67353	7.70774
757	24.649	25.293	45.15	12.861	13.954	25.831	20.743	26.525	16.699	11.534	10.441	9.465	19.27	30.723	12.639	11.553	8.86	11.963	31.6973	17.5487	15.9012	15.8347	11.6548	7.1935	6.74174	8.07025
758	23.549	24.351	44.866	13.102	14.133	25.668	20.646	26.089	17.783	11.287	10.275	9.11	19.297	30.048	14.434	11.631	8.652	12.701	30.922	17.6343	15.865	16.1272	12.0825	6.97643	6.76614	7.67511
759	23.685	24.757	44.977	12.466	14.024	25.905	20.751	26.17	16.565	11.784	10.771	10.362	19.259	30.026	13.614	11.94	8.629	12.875	31.1397	17.465	16.0672	16.0572	11.9955	7.35065	6.37491	7.66295
760	23.557	24.473	46.038	12.246	14.314	25.931	20.776	26.23	17.139	11.057	10.491	9.77	19.28	30.327	13.553	11.349	8.327	12.617	31.356	17.497	15.9105	15.9088	12.7232	7.37688	6.66795	7.92352
761	23.918	24.835	45.458	13.106	14.542	25.455	20.855	26.744	17.717	11.789	11.271	9.994	19.288	30.216	13.644	12.228	8.857	12.527	31.4037	17.701	16.395	16.1267	12.18	6.75344	6.59067	7.68989
762	23.106	23.842	45.571	12.468	13.82	26.02	20.639	26.582	16.028	11.473	10.638	9.823	19.138	30.412	12.176	11.434	8.352	12.03	30.8397	17.436	15.8638	15.5903	12.763	7.46463	6.64513	8.07799
763	23.324	25.041	45.221	12.735	13.921	25.771	20.791	26.852	16.423	11.611	10.957	9.894	19.307	30.776	12.823	11.713	8.708	11.958	31.1953	17.4757	16.088	15.8808	12.1769	7.2084	6.67578	8.08905
764	22.742	24.384	45.569	12.952	13.732	25.78	20.624	26.319	16.653	11.002	10.509	9.319	19.263	29.657	12.975	11.412	8.333	12.562	30.8983	17.488	15.7377	15.7003	12.7317	7.19167	6.7475	7.71265
765	23.24	24.551	45.417	13.335	14.182	25.888	20.51	26.841	16.757	11.398	11.136	10.046	19.172	30.505	13.501	11.781	8.816	12.124	31.0693	17.8017	16.1147	15.9832	12.4427	7.01576	6.61284	7.88839
766	23.501	24.041	45.64	11.761	13.379	25.929	20.635	26.822	16.629	11.657	10.703	9.79	19.425	30.562	13.528	11.865	8.173	11.865	31.0607	17.023	16.0393	15.903	12.629	7.75513	6.70029	8.06592
767	22.739	24.229	45.82	12.166	13.76	26.74	20.164	27.487	17.32	11.918	10.739	9.435	18.786	31.403	13.273	12.518	8.732	11.628	30.9293	17.5553	16.1772	16.0567	12.9172	7.99398	6.90339	8.20358
768	23.665	25.096	45.118	12.537	14.331	26.171	20.589	26.479	16.351	11.726	11.042	9.697	19.237	30.123	12.885	10.829	9.205	11.939	31.293	17.6797	15.9807	15.703	11.9942	7.40822	6.53553	7.85512
769	23.756	23.799	44.86	12.83	14.323	26.155	20.578	25.865	17.152	11.337	11.38	9.779	19.505	30.25	13.7	11.943	8.979	12.073	30.805	17.7693	16.0152	16.075	12.172	7.30047	6.34651	7.7689
770	23.299	24.114	44.156	11.782	13.653	25.499	20.805	25.807	16.823	10.614	10.35	9.117	19.41	29.676	12.808	12.024	7.487	11.561	30.523	16.978	15.586	15.4943	11.8136	7.43846	6.74124	7.94104
771	23.567	24.405	45.249	12.72	14.33	25.382	20.521	26.282	16.793	11.53	10.67	9.215	19.16	29.895	13.667	12.125	9.215	11.971	31.0737	17.4773	15.8352	16.0055	12.2833	6.89281	6.64907	7.56021
772	23.177	24.37	45.341	12.881	14.317	25.97	20.56	26.748	16.476	11.578	10.804	9.523	19.216	30.859	13.872	11.6	8.33	11.798	30.9627	17.7227	15.9482	15.9458	12.4663	7.1784	6.70862	8.14235
773	22.655	24.11	45.563	13.074	14.641	26.042	20.693	26.07	16.37	11.619	11.059	9.962	19.13	30.497	12.967	11.753	8.238	12.514	30.776	17.919	15.9622	15.8498	12.8266	7.07822	6.38156	7.99327
774	23.169	24.39	44.607	11.822	13.269	25.833	20.502	25.963	15.92	11.641	11.121	9.561	19.152	30.627	13.244	11.144	8.906	11.912	30.722	16.9747	15.7847	15.8308	12.0403	7.70558	6.38003	8.02403
775	21.947	24.023	44.969	12.748	13.686	25.388	20.364	26.472	16.674	10.985	10.717	9.578	19.038	30.408	13.903	10.694	8.238	12.614	30.313	17.274	15.7983	15.8158	12.7348	7.04256	6.68162	8.01101
776	23.434	24.211	44.897	12.506	14.54	26.182	20.204	26.003	16.96	11.363	10.608	9.396	19.013	30.359	12.617	12.666	8.299	11.157	30.8473	17.7427	15.7557	15.6852	12.1736	7.3791	6.51898	7.99981
777	22.956	24.18	44.802	12.471	14.596	25.652	20.565	26.14	16.861	11.432	10.901	10.231	19.315	30.071	12.4	12.24	8.753	12.587	30.646	17.573	16.0217	15.8943	12.2747	7.07683	6.39602	7.7483
778	23.356	23.751	44.967	12.991	14.966	26.206	20.485	26.687	16.067	10.783	11.248	10.318	19.264	30.99	12.978	10.713	8.134	12.038	30.6913	18.0543	15.9313	15.6862	12.3647	7.12828	6.57856	8.35965
779	23.353	25.162	44.497	12.801	14.378	25.186	20.406	25.908	16.733	11.92	11.271	9.392	19.284	30.397	13.735	12.036	8.929	12.245	31.004	17.455	15.9383	16.1043	11.7202	6.74151	6.33674	7.78377
780	23.648	24.283	44.03	12.012	13.705	25.613	20.493	25.665	16.115	11.66	11.331	9.544	19.243	30.233	13.363	11.824	8.815	12.717	30.6537	17.11	15.8013	16.0325	11.5886	7.41231	6.25605	7.74447
781	22.973	24.152	44.563	13.183	14.217	25.304	20.375	26.121	15.899	11.234	11.042	9.598	19.307	30.103	13.046	12.268	8.901	12.004	30.5627	17.568	15.7115	15.9382	12.139	6.71949	6.47098	7.73079
782	23.385	23.433	44.782	12.872	14.207	25.806	20.362	26.016	16.056	12.682	11.442	9.416	19.337	30.632	12.709	11.538	8.605	12.014	30.5333	17.6283	15.9957	15.8058	12.3397	7.11345	6.23673	8.0786
783	23.11	23.983	44.84	12.67	13.421	25.784	20.214	25.887	15.88	11.531	11.313	9.884	19.131	31.066	13.133	12.137	8.987	11.822	30.6443	17.2917	15.7848	16.046	12.3016	7.36416	6.23847	8.08152
784	22.196	23.463	44.263	13.083	13.968	25.812	20.406	26.029	16.111	10.954	10.811	10.237	19.192	30.561	13.217	11.504	9.16	10.811	29.974	17.621	15.758	15.7408	12.3908	7.1074	6.4071	8.04337
785	22.849	23.656	44.634	11.73	14.785	25.72	20.459	26.134	16.695	11.999	11.437	9.922	19.286	30.274	12.717	12.317	8.138	11.022	30.3797	17.4117	16.1077	15.6257	12.3512	7.35558	6.2732	8.05777
786	22.239	24.732	44.485	12.216	14.311	25.938	20.201	26.065	15.763	10.945	11.693	9.15	19.253	30.603	13.501	11.818	8.452	12.266	30.4853	17.4883	15.6362	15.9822	12.188	7.39222	6.46901	7.98094
787	22.824	23.744	44.405	13.053	14.097	26.229	20.324	26.406	15.379	11.487	11.76	9.771	19.249	30.686	12.754	11.735	8.578	12.233	30.3243	17.793	15.8545	15.8725	12.2029	7.32442	6.39352	8.05159
788	22.89	23.017	44.582	12.683	14.755	25.885	20.304	25.824	15.676	11.294	11.748	9.474	19.164	30.24	12.906	12.077	9.146	12.127	30.163	17.7743	15.72	15.9433	12.4874	7.10003	6.28466	7.74221
789	22.496	23.399	44.3	12.152	14.336	25.611	20.569	26.29	16.612	11.072	10.746	9.967	19.209	30.359	13.461	11.675	8.335	12.327	30.065	17.3663	15.876	15.8943	12.3361	7.22311	6.56245	7.92221
790	23.865	23.436	44.708	12.563	15.136	26.062	20.324	25.802	14.921	11.251	11.428	9.687	19.084	30.874	13.075	11.857	8.527	12.563	30.6697	17.9203	15.5688	15.9967	12.1594	7.1673	6.295	8.05141
791	21.343	24.366	44.258	12.324	13.707	25.944	20.169	26.148	16.568	12.452	11.35	8.891	18.998	30.159	12.716	12.042	8.891	12.042	29.989	17.325	15.9297	15.808	12.4494	7.49624	6.40943	7.77043
792	22.752	23.763	44.08	12.749	13.06	25.984	20.215	25.537	15.14	11.013	10.625	9.821	19.08	30.404	13.77	11.454	7.826	11.376	30.1983	17.2643	15.3918	15.6517	12.0325	7.55305	6.31161	8.12488
793	23.037	23.772	44.605	12.845	14.053	25.718	20.352	25.803	15.934	11.663	11.374	9.325	19.072	30.257	13.647	11.689	8.3	11.61	30.4713	17.5387	15.7418	15.7625	12.2456	7.10921	6.31519	7.93781
794	22.35	22.874	44.203	11.986	14.028	25.684	20.121	25.851	15.673	10.809	10.599	9.631	18.993	30.744	12.733	12.013	8.427	11.411	29.809	17.2327	15.4473	15.7202	12.4683	7.38994	6.46499	8.13452
795	22.296	21.768	43.758	12.137	13.245	25.157	20.39	25.752	15.915	10.976	10.607	9.472	19.042	30.3	12.997	11.425	8.232	11.161	29.274	16.8463	15.5187	15.5262	12.5463	7.21854	6.47967	8.07593
796	22.904	22.958	43.685	12.653	14.869	25.809	20.295	25.743	15.526	11.345	11.372	9.904	19.305	30.996	13.612	11.132	9.023	11.986	29.849	17.777	15.6975	16.009	11.9824	7.04361	6.21767	8.12396
797	22.129	23.077	44.205	12.622	14.003	26.177	20.085	25.541	15.229	11.511	11.755	10.022	18.963	31.001	12.773	11.728	8.424	11.647	29.8037	17.6007	15.6905	15.756	12.4809	7.45935	6.02736	8.22752
798	22.397	23.43	43.879	13.047	13.835	26.117	20.266	26.354	15.928	10.791	10.628	9.894	19.272	30.793	13.645	12.802	8.834	11.905	29.902	17.6663	15.6435	16.2085	12.1155	7.32909	6.60185	7.91419
799	21.48	24.189	44.573	11.692	14.427	26.431	20.058	26.181	15.604	11.236	10.459	9.654	19.071	30.631	13.65	12.041	8.93	11.236	30.0807	17.5167	15.532	15.9265	12.6236	7.84022	6.52124	7.9667
800	22.36	23.022	44.087	12.738	13.951	26.221	20.021	26.142	15.821	11.414	11.359	9.098	18.813	30.835	13.175	12.159	8.795	12.049	29.823	17.6367	15.6425	15.971	12.3574	7.45895	6.45758	7.97799
801	22.582	23.846	44.824	12.335	13.736	26.661	20.047	25.588	15.158	11.291	11.044	10.055	19.046	30.816	12.557	11.538	9.093	12.198	30.4173	17.5773	15.5305	15.8747	12.4925	7.89781	6.16075	8.03272
802	21.532	22.974	44.295	12.181	14.206	25.735	20.159	25.878	15.045	11.016	11.21	9.545	18.97	30.735	12.542	11.737	8.546	11.432	29.6003	17.374	15.4755	15.6603	12.7464	7.31129	6.38099	8.14627
803	21.743	24.059	43.724	11.031	14.157	25.779	20.06	25.47	15.21	11.639	10.365	9.265	18.896	30.287	12.372	11.06	8.628	11.61	29.842	16.989	15.3348	15.4755	12.0778	7.77117	6.32875	8.02545
804	21.789	23.27	43.774	12.76	13.244	25.742	19.792	26.199	14.97	10.823	11.678	8.915	19.1	30.045	13.45	11.45	8.231	11.82	29.611	17.2487	15.3962	15.6827	12.2879	7.35942	6.52611	7.89053
805	22.661	23.401	44.498	11.914	14.074	25.967	20.204	26.205	14.659	11.061	11.771	9.753	19.032	31.113	12.279	12.198	8.388	11.658	30.1867	17.3183	15.6088	15.778	12.3995	7.56743	6.38747	8.27522
806	22.199	23.732	44.105	12.647	14.77	26.055	19.719	25.774	15.817	11.439	11.173	9.552	18.889	30.802	12.901	11.733	9.316	11.498	30.012	17.824	15.579	15.8565	12.2289	7.20686	6.22915	8.00096
807	21.567	22.752	44.572	11.911	13.732	25.997	20.075	25.671	14.723	11.101	11.564	10.292	19.106	30.363	12.974	11.651	8.615	11.882	29.6303	17.2133	15.571	15.7652	12.9534	7.66118	6.11424	7.93951
808	22.403	22.993	44.047	12.131	14.463	26.476	19.686	25.706	14.818	11.806	10.862	9.711	18.82	30.76	12.478	12.19	8.56	10.478	29.8143	17.69	15.4315	15.5477	12.3294	7.69772	6.17724	8.214
809	21.949	23.252	43.841	12.056	13.596	25.446	19.87	25.802	15.256	11.671	11.345	8.738	18.788	30.425	12.8	11.878	9.182	11.582	29.6807	17.0327	15.447	15.7758	12.2805	7.32673	6.37057	7.85859
810	21.315	23.026	44.284	12.849	13.66	26.142	20.051	25.256	15.664	10.718	10.988	9.337	19.089	30.603	13.577	11.438	8.346	12.038	29.5417	17.5503	15.3357	15.8485	12.7959	7.45164	6.27637	8.04507
811	22.076	22.29	44.135	13.172	14.43	26.213	19.647	25.293	13.895	11.053	11.851	9.856	19.102	30.356	12.435	11.821	8.566	12.097	29.5003	17.9383	15.2658	15.7295	12.6744	7.19362	6.00489	7.9492
812	21.514	24.028	43.556	11.67	13.435	26.132	20.061	24.849	14.872	10.832	11.011	9.904	18.818	31.028	13.638	12.089	8.408	10.742	29.6993	17.079	15.2548	15.7872	12.0659	7.88964	6.0249	8.24221
813	22.02	23.008	43.075	12.014	14.206	25.676	19.7	25.424	15.488	11.334	10.716	9.203	18.917	30.808	13.057	11.767	8.03	10.871	29.3677	17.2987	15.3108	15.575	11.8812	7.3373	6.25789	8.28383
814	21.078	23.38	43.638	11.872	14.113	26.371	19.677	25.794	14.198	10.842	11.387	9.631	18.743	31.099	12.87	10.69	8.692	11.781	29.3653	17.452	15.2548	15.6458	12.414	7.80493	6.28979	8.29399
815	23.082	23.464	43.184	12.512	14.39	26.086	19.944	25.669	15.363	11.589	12.512	10.411	18.745	30.564	14.169	12.83	8.5	12.194	29.91	17.6627	15.9147	16.167	11.4972	7.35501	5.8697	7.79249
816	22.649	23.592	43.404	13.4	13.715	26.177	19.904	25.226	15.864	12.331	11.733	10.947	19.03	30.637	14.258	12.708	8.053	12.299	29.8817	17.764	16.0008	16.1642	11.7202	7.28757	5.61392	7.92446
817	22.83	23.867	43.141	12.759	14.184	26.274	19.72	25.667	15.029	12.565	11.949	10.395	18.621	30.37	12.622	12.435	8.549	12.824	29.946	17.739	15.8875	15.9035	11.439	7.42579	5.79279	7.78505
818	21.679	23.03	43.622	12.802	13.831	26.425	19.783	26.09	15.093	11.29	11.869	10.132	18.903	30.38	13.21	12.062	8.17	10.614	29.4437	17.686	15.7095	15.5565	12.2974	7.58566	6.16633	8.09496
819	21.183	22.822	43.457	13.179	13.95	26.358	19.825	25.411	14.478	12.697	12.054	9.45	18.817	31.02	12.971	11.572	8.936	11.765	29.154	17.829	15.6525	15.8468	12.4138	7.39638	5.90208	8.12419
820	20.945	22.925	44.239	11.335	13.665	25.91	19.823	25.337	15.537	10.983	11.622	9.259	19.001	31.104	12.926	11.111	8.653	11.367	29.3697	16.97	15.4268	15.6937	12.9152	7.82943	6.16143	8.31106
821	21.348	22.857	43.32	12.488	14.157	26.492	19.736	25.452	14.696	10.016	11.782	10.177	18.723	31.255	13.34	10.69	8.026	11.91	29.175	17.7123	15.3098	15.6573	12.2731	7.64907	6.15869	8.42626
822	20.669	22.736	43.02	12.073	14.37	25.916	19.549	25.108	14.157	10.663	11.319	9.416	18.843	30.456	13.757	10.925	8.596	11.581	28.8083	17.453	15.0353	15.693	12.351	7.41861	6.11733	8.02031
823	21.534	23.878	43.561	11.989	13.932	26.319	19.794	25.163	14.572	10.717	10.985	10.214	18.761	30.929	14.004	12.358	7.87	11.253	29.6577	17.4133	15.2408	15.8625	12.0975	7.77348	6.05763	8.20078
824	21.953	22.903	42.787	12.877	14.581	26.323	19.844	25.13	14.324	11.533	11.664	10.321	18.633	31.086	12.888	11.828	9.338	12.418	29.2143	17.927	15.4693	16.0318	11.7639	7.3209	5.83539	7.9852
825	21.157	22.017	43.096	13.157	14.413	26.62	19.843	25.207	15.235	11.603	12	10.512	18.743	31.237	13.356	11.934	9.455	11.603	28.7567	18.0633	15.7333	16.0547	12.4257	7.43685	5.74714	8.0668
826	20.209	23.212	43.552	12.382	13.765	26.158	19.558	25.681	14.233	10.526	10.897	9.109	18.475	30.657	12.689	11.201	9.143	11.606	28.991	17.435	15.0007	15.6285	12.6993	7.58592	6.43432	8.00555
827	21.939	22.846	43.759	11.441	14.58	26.357	19.504	25.719	14.648	10.952	11.406	9.348	18.851	31.028	13.396	11.336	8.232	11.999	29.5147	17.4593	15.2628	15.807	12.3443	7.86382	6.26324	8.22957
828	22.18	23.62	43.244	12.204	14.638	26.208	19.783	24.902	14.163	12.033	12.239	9.427	18.646	31.163	13.613	12.719	9.188	11.793	29.6813	17.6833	15.4245	16.187	11.7677	7.48222	5.79708	7.96584
829	20.647	23.675	43.017	12.285	14.556	26.426	19.409	25.653	14.281	11.115	11.803	9.738	18.519	31.142	12.694	12.01	8.706	11.7	29.113	17.7557	15.3332	15.7952	12.136	7.5941	6.09556	8.1721
830	20.904	21.652	43.017	12.033	13.358	26.754	19.6	25.599	14.153	10.843	12.678	9.857	18.709	30.918	12.951	11.965	8.192	11.251	28.5243	17.3817	15.455	15.6643	12.5566	8.14367	6.03485	8.22563
831	20.895	21.997	43.472	11.36	13.735	26.23	19.362	25.503	13.965	11.05	11.394	9.57	18.608	30.975	13.116	11.704	8.399	11.36	28.788	17.1083	15.1407	15.6937	12.7286	7.98835	6.13813	8.20448
832	21.292	22.143	43.063	11.71	13.52	26.043	19.429	25.474	13.013	10.539	10.823	8.588	18.451	30.951	11.495	11.391	8.091	10.433	28.8327	17.091	14.6443	15.1353	12.3312	7.8053	6.49571	8.48688
833	21.373	22.148	42.996	12.817	13.908	26.855	19.735	25.449	15.465	11.338	10.528	10.704	18.501	30.896	12.691	11.373	8.803	11.937	28.839	17.86	15.5365	15.7002	12.2664	7.80897	6.03251	8.10271
834	22.289	23.349	43.243	12.716	14.765	26.162	19.56	25.254	13.814	12.822	13.034	9.573	18.61	31.403	12.749	13.282	9.926	12.01	29.627	17.881	15.6762	16.33	11.8037	7.24436	5.70373	7.92693
835	22.262	22.985	42.958	11.999	13.444	26.464	19.653	25.313	13.52	11.926	11.529	8.89	18.694	30.692	12.82	12.36	8.385	11.493	29.4017	17.3023	15.1385	15.7407	11.7457	7.96706	6.14676	8.05447
836	20.659	21.712	43.108	11.084	14.591	26.534	19.666	25.095	13.827	9.856	11.084	8.804	18.693	31.056	13.545	11.119	8.102	10.312	28.493	17.403	14.722	15.4712	12.6679	8.09976	6.39967	8.44796
837	20.971	22.266	43.211	11.691	13.813	25.653	19.446	24.386	14.255	11.511	10.863	9.424	18.385	31.365	12.787	12.338	8.849	10.791	28.816	17.0523	14.9808	15.7525	12.4832	7.52358	5.81027	8.28744
838	21.314	22.323	43.23	11.544	14.152	26.204	19.367	24.604	12.801	11.37	12.1	9.11	18.538	30.889	12.021	11.544	8.414	11.266	28.9557	17.3	14.892	15.4453	12.3722	7.82057	5.87115	8.26951
839	20.326	22.698	42.461	12.11	14.873	25.991	19.39	25.367	14.523	10.517	11.402	8.888	18.565	30.652	13.11	12.004	8.322	12.075	28.495	17.658	15.0145	15.788	12.1529	7.34763	6.28287	7.99585
840	21.837	22.409	42.831	12.152	12.866	26.631	19.578	25.518	13.077	10.436	11.544	8.863	18.548	31.593	13.883	11.222	9.507	11.437	29.0257	17.2163	14.836	16.0317	11.9592	8.16115	6.41186	8.24523
841	22.506	23.42	42.622	11.801	14.724	26.141	19.395	25.005	13.105	12.203	12.897	9.792	18.406	30.719	12.678	11.436	8.842	12.459	29.516	17.5553	15.3995	15.7567	11.3593	7.57768	5.68188	7.9715
842	21.795	22.513	43.126	13.321	14.506	26.67	19.982	24.983	14.109	11.777	11.993	10.054	18.576	31.876	12.909	11.957	8.689	11.598	29.1447	18.1657	15.483	15.9342	12.1135	7.38876	5.79254	8.45441
843	21.101	22.752	43.183	12.22	13.284	26.576	19.121	25.159	13.381	10.495	11.817	9.321	18.527	31.432	13.274	11.743	8	11.046	29.012	17.36	14.8823	15.6703	12.3002	7.999	6.08939	8.46139
844	21.41	22.85	43.056	11.886	13.4	26.069	19.321	25.005	13.495	10.89	11.702	9.228	18.487	31.584	12.771	12.219	8.269	11.406	29.1053	17.1183	14.9402	15.7893	12.1031	7.78838	6.03489	8.41874
845	21.281	23.598	43.156	13.427	14.441	27.105	19.577	24.575	13.212	11.039	11.726	9.663	18.35	30.924	12.675	12.523	8.324	12.45	29.345	18.3243	14.9653	15.8743	12.0167	7.62116	5.84314	8.0352
846	21.679	22.476	42.523	11.582	13.898	26.648	19.399	24.302	12.667	11.22	11.871	10.387	18.337	30.975	13.208	11.582	8.976	11.075	28.8927	17.376	14.9743	15.6922	11.8109	8.11286	5.59779	8.12465
847	21.449	22.029	42.606	11.123	12.645	26.559	19.24	24.98	14.025	10.978	11.304	9.239	18.302	31.178	12.844	11.739	8.333	11.014	28.6947	16.7757	14.961	15.5683	12.0511	8.50672	6.0257	8.32241
848	21.372	22.351	43.141	10.922	15.457	26.262	19.511	25.038	12.963	10.922	12.518	9.833	18.386	31.434	12.593	12.409	9.289	11.865	28.9547	17.547	15.1308	15.996	12.2955	7.88067	5.91009	8.13068
849	21.825	23.954	42.907	11.905	12.915	26.669	19.21	24.379	12.572	11.075	11.941	8.911	18.346	31.472	12.283	11.76	8.802	11.797	29.562	17.163	14.6813	15.7433	11.606	8.24791	5.87902	8.31578
850	20.924	22.853	42.299	12.664	13.719	26.2	19.377	24.423	14.356	10.699	10.844	9.643	18.489	31.03	13.013	11.536	8.443	11.79	28.692	17.5277	14.8903	15.7168	11.8234	7.52896	5.87813	8.18898
851	22.072	22.285	43.031	13.307	15.153	26.174	19.087	24.587	13.808	11.107	12.704	10.043	18.497	32.099	13.808	12.775	8.801	11.852	29.1293	18.2113	15.2227	16.3053	12.0397	6.95737	5.56303	8.35572
852	21.839	22.431	42.492	12.504	13.41	25.915	19.306	24.786	12.821	10.763	11.041	10.867	18.483	31.22	11.665	11.808	8.673	11.216	28.9207	17.2763	14.9307	15.5108	11.7568	7.49501	5.82639	8.3584
853	20.728	21.814	42.498	13.13	14.461	26.637	19.469	24.757	14.131	11.345	12.85	9.664	18.518	31.139	12.732	11.835	8.613	11.59	28.3467	18.076	15.3693	15.7378	12.2674	7.44385	5.6844	8.2117
854	20.374	22.489	43.192	12.513	14.663	26.487	19.373	25.219	13.989	11.35	12.443	10.222	18.329	31.138	13.813	12.443	9.094	12.372	28.685	17.8877	15.4327	16.1982	12.6079	7.52443	5.76437	7.90744
855	20.804	21.086	41.948	11.953	12.447	26.501	19.155	25.068	13.347	11.53	11.601	8.604	18.485	31.408	12.828	11.425	8.604	10.931	27.946	16.967	14.8842	15.6135	12.1269	8.26038	6.09563	8.41514
856	21.069	22.273	42.846	12.925	13.279	27.117	19.124	24.561	13.021	10.729	11.898	9.88	18.208	31.744	12.778	12.358	8.817	11.508	28.7293	17.7737	14.8688	15.9022	12.2402	8.0935	5.76735	8.34398
857	20.954	20.851	41.988	12.206	13.693	27.155	19.14	25.397	14.426	12.206	11.722	9.855	18.177	32.133	12.43	11.445	8.091	11.376	27.931	17.6847	15.4577	15.6087	12.1738	8.23518	5.8195	8.73522
858	21.906	22.398	42.699	13.08	13.783	26.804	19.136	24.608	13.627	11.709	12.06	10.267	18.242	31.21	11.95	12.518	9.107	11.674	29.001	17.889	15.2345	15.7835	11.8654	7.72861	5.52903	8.13442
859	21.187	21.745	42.663	12.112	14.031	26.967	19.19	24.926	13.778	11.449	13.019	10.052	18.662	31.81	12.396	12.74	8.412	11.379	28.5317	17.7033	15.4023	15.8998	12.2413	8.07975	5.61463	8.47974
860	20.87	22.638	42.567	13.154	14.888	26.676	19.341	25.203	12.981	11.115	13.256	10.299	18.326	31.914	13.324	12.542	9.211	12.373	28.6917	18.2393	15.3658	16.2817	12.0489	7.35763	5.7698	8.20432
861	20.245	22.286	41.621	11.637	13.474	26.747	19.127	24.593	12.22	10.48	10.99	9.731	18.297	31.479	12.815	11.637	9.187	10.922	28.0507	17.286	14.5235	15.7228	11.7965	8.24479	5.99494	8.31622
862	21.064	21.927	42.373	12.396	14.537	26.946	19.183	24.909	14.375	11.222	11.809	10.048	18.344	31.635	13.613	11.637	10.083	12.086	28.4547	17.9597	15.2577	16.233	12.0614	7.85567	5.73857	8.05836
863	21.828	20.103	41.805	12.138	14.931	26.582	19.29	24.717	14.07	12.103	12.345	9.414	18.414	31.729	13.59	12.034	8.103	11.828	27.912	17.8837	15.3232	15.9497	12.0626	7.66133	5.65168	8.42044
864	21.063	22.587	42.082	12.665	14.257	26.974	19.245	24.963	12.21	11.107	12.428	8.906	18.175	31.569	13.589	11.311	8.906	10.701	28.5773	17.9653	14.8098	15.7085	11.7202	7.84224	6.06228	8.40022
865	20.341	22.378	42.584	11.824	13.995	26.823	19.425	25.085	13.379	11.256	12.124	9.786	18.518	31.704	12.76	12.325	7.816	11.089	28.4343	17.5473	15.1758	15.702	12.2962	8.10597	5.88566	8.57347
866	20.31	21.761	41.803	12.232	14.375	27.173	19.232	24.478	13.782	10.814	13.254	10.913	18.507	32.242	12.874	13.65	9.529	11.342	27.958	17.9267	15.4122	16.3573	12.0121	8.07893	5.39409	8.3449
867	20.106	20.868	41.603	12.686	13.117	26.847	19.092	24.223	12.414	10.865	12.421	10.07	18.089	31.436	12.906	12.322	9.043	11.395	27.5257	17.55	14.8475	15.8652	12.1973	8.05432	5.59304	8.18818
868	21.505	21.44	42.072	12.464	13.077	26.842	19.265	24.54	13.565	11.786	12.399	9.816	18.502	31.881	14.253	11.56	7.459	12.108	28.339	17.461	15.2285	15.9605	11.8932	8.12996	5.56627	8.5944
869	20.575	21.598	42.79	12.219	14.729	27.168	19.276	24.631	13.838	12.285	12.616	10.172	18.22	32.226	13.705	11.559	9.082	11.724	28.321	18.0387	15.4697	16.086	12.541	8.00522	5.43013	8.47702
870	21.021	23.46	42.517	11.895	14.563	27.248	19.16	24.45	12.37	11.137	11.928	10.708	18.246	32.094	12.37	11.301	9.226	11.796	28.9993	17.902	14.9588	15.8388	11.77	8.20307	5.59099	8.51732
871	20.992	21.41	42.232	11.88	14.52	26.513	19.293	24.696	12.902	11.365	13.715	10.464	18.371	31.948	13.035	11.816	8.822	12.138	28.2113	17.6377	15.4058	16.0217	12.1441	7.79879	5.50083	8.39873
872	20.708	20.937	43.248	11.664	14.384	27.056	18.977	24.214	13.327	11.763	12.484	10.321	18.404	31.943	13.261	12.713	9.043	11.173	28.2977	17.7013	15.181	16.0895	12.9479	8.21474	5.32951	8.3656
873	20.546	22.464	42.478	11.964	14.759	27.027	19.13	24.708	12.796	11.736	12.549	9.135	18.174	32.146	12.796	11.671	8.81	12.094	28.496	17.9167	15.009	15.9485	12.1467	8.01259	5.78305	8.50132
874	20.193	21.029	41.911	12.926	13.119	27.764	19.184	25.399	13.529	11.35	12.669	9.807	18.159	32.616	13.333	11.897	8.296	11.64	27.711	17.9363	15.323	15.9902	12.3047	8.51156	5.88058	8.75284
875	19.779	21.893	42.545	12.98	14.899	26.852	19.139	24.467	11.712	11.841	13.175	10.052	18.27	31.922	13.063	12.459	8.751	11.906	28.0723	18.2437	15.0643	16.0618	12.5782	7.51653	5.57376	8.356
876	19.744	20.99	41.613	12.843	13.323	26.487	19.068	23.935	13.301	10.447	12.46	9.265	18.17	31.419	13.138	11.949	8.626	11.597	27.449	17.551	14.746	15.8165	12.2822	7.74252	5.63833	8.25368
877	21.172	21.266	41.947	13.159	15.529	27.225	19.209	24.441	13.141	11.319	14.094	10.976	18.315	31.569	12.853	13.471	8.669	12.348	28.1283	18.6377	15.53	16.2042	11.9674	7.53067	5.27602	8.1349
878	20.297	20.916	42.459	12.593	15.006	27.609	19.211	24.957	13.165	10.272	13.521	10.056	18.166	32.314	12.792	13.583	8.787	12.314	27.8907	18.4027	15.197	16.326	12.6203	8.06369	5.81366	8.38985
879	20.804	20.405	41.926	12.458	14.207	27.131	18.899	24.781	12.394	10.739	12.581	9.512	18.148	31.901	13.821	12.826	8.714	10.924	27.7117	17.932	14.8177	16.0557	12.3116	8.01442	5.85812	8.37987
880	21.111	22.289	41.694	13.38	13.953	27.403	18.959	24.334	13.536	11.628	13.168	10.329	18.313	32.107	12.898	11.93	8.275	11.688	28.3647	18.2453	15.3257	15.8685	11.5586	7.93595	5.30752	8.5923
881	20.345	21.654	41.208	11.898	13.831	26.946	19.16	24.739	13.27	11.481	12.909	9.756	18.293	32.264	13.776	12.552	8.328	11.065	27.7357	17.5583	15.2192	16.0463	11.6857	8.18721	5.64116	8.60013
882	20.629	21.649	42.144	12.296	13.578	27.055	18.984	24.928	12.641	10.693	13.578	11.247	18.1	32.257	13.506	12.092	8.858	11.364	28.1407	17.643	15.3452	16.0295	12.138	8.1762	5.54878	8.5169
883	20.635	22.21	41.96	12.965	14.482	27.255	19.132	24.31	13.026	12.078	13.137	10.504	18.265	32.524	13.112	12.936	8.586	12.965	28.2683	18.234	15.3645	16.398	11.8835	7.84915	5.27393	8.47502
884	19.902	22.099	41.603	12.446	14.425	27.498	19.172	24.624	12.913	11.443	12.907	10.738	18.137	32.297	13.025	13.883	9.328	11.036	27.868	18.123	15.2995	16.2843	11.9455	8.17906	5.4597	8.39241
885	21.897	22.595	41.579	13.595	14.078	27.21	18.967	24.622	12.012	11.15	13.487	10.747	18.285	32.275	12.581	12.816	9.189	11.795	28.6903	18.2943	15.1642	16.1568	11.1674	7.72497	5.51881	8.43621
886	21.301	21.834	41.247	12.823	14.156	26.805	19.226	24.016	13.276	11.117	13.063	10.93	18.402	32.178	12.809	12.983	9.118	11.73	28.1273	17.928	15.2713	16.2033	11.3651	7.71655	5.23588	8.39201
887	20.228	21.367	42.173	12.557	14.329	27.736	19.15	24.5	12.503	11.063	13.468	10.759	18.211	32.372	13.328	12.81	9.089	11.873	27.9227	18.2073	15.2405	16.2805	12.3543	8.29949	5.46248	8.42103
888	20.662	20.509	41.724	11.323	14.275	27.086	19.025	24.556	13.448	11.018	12.621	10.712	18.156	32.391	13.829	12.112	8.499	11.221	27.6317	17.5613	15.23	16.0347	12.2046	8.37962	5.46831	8.62832
889	20.578	21.774	41.814	13.553	15.571	27.181	19.2	24.588	11.589	11.759	12.88	10.663	18.419	32.367	12.494	13.004	8.819	12.581	28.0553	18.7683	15.1132	16.2807	11.9304	7.35512	5.56661	8.4591
890	20.87	20.988	41.717	12.574	14.606	27.231	19.131	24.244	12.503	11.959	13.117	10.919	18.048	32.302	13.903	12.952	9.076	11.416	27.8583	18.137	15.3122	16.2828	12.0021	7.9409	5.24624	8.39181
891	21.017	22.243	41.976	12.347	14.52	27.948	18.962	24.415	12.808	11.376	13.896	11.329	18.222	32.734	13.684	12.948	9.087	11.931	28.412	18.2717	15.4643	16.4343	11.7628	8.45009	5.20921	8.51889
892	20.423	21.263	41.358	12.721	14.857	27.085	18.826	24.322	12.537	12.04	13.676	10.563	18.22	32.612	14.155	12.426	9.428	11.904	27.6813	18.221	15.3273	16.4575	11.8518	7.75039	5.23761	8.43537
893	20.056	21.23	41.477	12.538	14.189	27.225	19.192	24.405	13.114	10.582	12.69	10.169	18.243	32.549	13.936	12.386	8.887	11.343	27.5877	17.984	15.0253	16.224	12.0428	8.0454	5.61736	8.58141
894	21.022	23.178	41.774	13.282	15.502	27.821	19.011	24.481	12.949	12.009	13.562	11.061	18.37	32.859	13.748	13.001	9.616	12.484	28.658	18.8683	15.5122	16.6797	11.4098	7.83229	5.19884	8.4173
895	20.858	21.501	41.923	12.627	14.783	27.541	19.037	24.149	12.93	12.109	14.493	10.491	18.296	32.009	13.634	13.705	9.164	12.295	28.094	18.317	15.5348	16.5172	11.9806	8.06063	5.12867	8.13975
896	19.59	21.999	41.995	12.502	14.254	27.703	19.034	24.54	12.424	11.467	13.498	10.412	18.118	32.669	13.359	12.821	9.058	11.109	27.8613	18.153	15.2292	16.189	12.2992	8.31681	5.46614	8.61767
897	21.334	21.821	41.519	13.417	15.172	27.864	19.001	24.174	12.718	11.739	14.06	10.745	18.035	32.582	13.796	13.417	9.107	11.135	28.2247	18.8177	15.4062	16.3453	11.5158	7.88334	5.17708	8.49823
898	20.451	21.468	41.612	12.759	14.793	27.629	19.015	24.386	12.988	11.668	13.739	10.762	18.244	32.468	13.911	13.129	9.024	11.853	27.8437	18.3937	15.4263	16.4382	11.9346	8.06243	5.25029	8.40889
899	20.402	22.142	41.403	12.848	14.283	27.967	19.1	24.237	12.809	11.807	13.673	10.336	18.139	32.696	13.747	13.189	9.69	11.843	27.9823	18.366	15.327	16.5507	11.6552	8.34561	5.29151	8.38554
900	21.318	22.573	41.998	13.143	14.276	27.952	19.013	24.714	12.888	11.347	13.23	10.79	18.125	33.098	13.929	12.585	8.803	12.376	28.6297	18.457	15.3303	16.486	11.5943	8.2424	5.44928	8.6755
901	20.656	21.446	41.145	13.238	15.299	27.373	18.921	24.172	12.682	11.951	13.908	11.161	18.118	32.626	14.205	13.324	9.032	11.933	27.749	18.6367	15.4658	16.5397	11.608	7.63574	5.07539	8.42186
902	20.986	22.095	41.609	12.647	14.85	27.83	19.018	24.326	13.209	11.439	13.822	10.95	18.238	32.812	13.556	13.283	9.008	12.435	28.23	18.4423	15.4607	16.5553	11.5998	8.20424	5.20623	8.49416
903	20.493	21.277	41.318	12.542	14.926	27.802	18.816	24.246	12.808	11.582	14.318	10.638	18.118	32.836	13.857	12.782	9.007	11.47	27.696	18.4233	15.4013	16.345	11.8035	8.20917	5.19738	8.62083
904	20.755	22.566	41.152	13.125	14.766	27.647	18.982	24.024	13.025	12.026	13.605	11.252	18.204	32.514	14.122	13.202	9.271	12.986	28.1577	18.5127	15.4857	16.7165	11.2898	7.953	4.99224	8.24874
905	19.936	21.888	41.28	12.812	14.733	27.858	18.798	23.925	12.9	11.269	13.825	10.392	18.123	32.549	14.329	12.842	9.121	12.041	27.7013	18.4677	15.1848	16.5008	11.7999	8.18879	5.19269	8.39799
906	21.446	22.387	41.002	13.509	14.67	27.841	18.813	24.111	13.416	11.877	14.391	11.701	18.26	32.782	14.041	13.656	9.319	11.862	28.2783	18.6733	15.7182	16.6533	11.0291	7.96063	4.85739	8.42939
907	20.742	21.766	41.093	12.98	14.842	27.787	18.872	24.201	12.771	12.297	14.743	11.018	18.116	32.76	14.257	13.321	9.454	12.212	27.867	18.5363	15.6503	16.6867	11.4655	8.06523	5.0062	8.36612
908	20.783	21.972	41.487	12.559	14.895	27.673	18.821	24.282	13.014	11.846	14.154	11.259	18.042	32.604	14.02	13.804	9.385	11.832	28.0807	18.3757	15.5627	16.6145	11.6254	8.136	5.04893	8.33631
909	20.242	21.426	41.154	12.804	14.768	27.509	18.823	24.122	13.105	11.5	14.566	10.76	18.082	32.922	14.068	13.302	9.334	12.051	27.6073	18.3603	15.4793	16.6265	11.7467	7.9836	5.10793	8.47792
910	20.568	21.117	41.275	12.6	14.703	27.724	18.781	24.108	13.005	11.422	14.435	10.753	18.061	32.597	14.305	13.016	9.172	11.851	27.6533	18.3423	15.4173	16.5003	11.7999	8.19252	5.12533	8.41212
911	20.348	22.024	40.615	13.14	14.603	27.396	18.869	23.879	12.829	11.637	13.872	10.879	17.995	32.291	14.174	13.512	9.23	11.837	27.6623	18.3797	15.3275	16.5065	11.2486	7.84256	5.04857	8.25258
912	20.222	21.856	41.012	13.163	14.614	27.652	18.841	24.065	12.659	11.778	13.673	11.124	17.946	32.803	15.047	12.941	8.902	11.908	27.6967	18.4763	15.3567	16.5912	11.5603	7.97941	5.07563	8.50203
913	20.879	21.767	41.439	13.204	14.515	27.871	18.649	24.039	12.5	11.815	14.258	11.005	17.854	32.921	14.787	13.577	9.578	12.214	28.0283	18.53	15.3777	16.8218	11.6225	8.11606	5.04119	8.35013
914	20.432	21.581	41.374	13.115	14.558	27.816	18.763	23.546	12.563	11.62	14.072	11.161	17.957	32.482	14.179	13.217	9.782	11.467	27.7957	18.4963	15.2875	16.514	11.7732	8.10325	4.89205	8.29667
915	20.602	21.703	40.716	13.009	14.743	27.663	18.763	23.915	12.516	11.048	14.477	11.048	17.839	32.631	14.358	13.503	9.504	11.554	27.6737	18.4717	15.2945	16.5648	11.3084	8.00701	5.11463	8.35409
916	20.834	21.706	41.185	12.925	15.098	27.996	18.705	23.989	13.185	11.914	14.352	11.409	17.919	32.601	14.757	13.683	9.766	12.344	27.9083	18.673	15.5923	16.845	11.5062	8.14673	4.86943	8.17477
917	20.115	21.896	40.6	13.209	15.362	27.709	18.689	23.566	13.058	11.915	14.247	10.66	18.023	32.498	15.152	13.53	9.635	12.031	27.537	18.76	15.3558	16.8115	11.3479	7.82447	4.87681	8.19038
918	20.691	21.316	40.796	13.029	15.094	27.698	18.685	23.838	12.588	11.831	14.164	11.181	18.074	32.875	14.603	13.093	9.243	12.302	27.601	18.607	15.3812	16.6983	11.4315	7.94045	4.93886	8.43653
919	21.034	21.541	40.899	13.551	14.941	27.708	18.794	23.613	12.614	11.303	14.486	11.329	18.017	32.858	14.49	13.85	9.562	11.966	27.8247	18.7333	15.3565	16.7905	11.3255	7.8033	4.91766	8.35625
920	20.904	21.641	41.023	12.961	15.108	27.495	18.674	23.479	12.592	11.591	14.067	11.42	17.993	32.579	14.293	13.844	9.905	12.355	27.856	18.5213	15.3038	16.8282	11.4089	7.84522	4.81548	8.15742
921	20.668	21.581	40.773	13.032	14.978	28.023	18.652	23.917	12.82	11.998	14.709	11.3	17.956	32.994	14.272	13.595	9.824	11.837	27.674	18.6777	15.566	16.7463	11.3532	8.15157	4.86759	8.40861
922	21.134	21.394	40.86	12.817	15.121	27.75	18.672	23.453	13.542	12.013	14.153	11.399	18.047	32.386	14.774	13.308	9.913	11.767	27.796	18.5627	15.5387	16.6992	11.3145	8.03943	4.64604	8.16674
923	20.148	21.752	40.773	13.048	14.844	27.657	18.695	23.453	12.762	11.595	14.995	11.047	17.955	32.482	14.526	13.706	9.677	11.376	27.5577	18.5163	15.4245	16.6203	11.4729	7.96682	4.82191	8.27002
924	20.728	21.201	40.743	13.471	15.07	27.856	18.724	23.825	12.403	12.165	14.556	11.442	18.098	32.835	14.808	13.207	9.12	12.053	27.5573	18.799	15.5192	16.6868	11.4216	7.88423	4.85324	8.45131
925	21.328	21.959	40.872	14.228	14.63	28.075	18.738	23.785	12.931	12.306	14.974	11.188	18.007	32.789	14.292	13.282	9.38	12.651	28.053	18.9777	15.6537	16.7335	11.1061	7.88109	4.78865	8.34285
926	20.803	22.248	41.021	13.139	14.453	27.621	18.649	23.59	12.322	11.358	14.423	11.27	17.973	32.74	14.24	13.839	9.898	12.409	28.024	18.4043	15.2687	16.8498	11.2789	8.00886	4.9265	8.21808
927	21.116	21.827	40.232	13.251	14.778	27.612	18.598	23.476	12.658	11.844	15.202	11.662	18.044	32.579	14.013	14.309	9.923	12.177	27.725	18.547	15.5733	16.8408	10.8372	7.88756	4.67855	8.16275
928	20.572	21.384	40.545	13.261	14.917	28.088	18.669	23.482	12.706	11.84	14.823	11.215	18	32.996	14.541	13.855	9.278	11.934	27.5003	18.7553	15.4558	16.7673	11.3043	8.12463	4.77001	8.45906
929	20.438	21.494	40.4	12.506	14.457	27.611	18.642	23.515	12.392	11.61	14.345	10.811	17.868	33.005	15.04	12.97	9.036	12.042	27.444	18.1913	15.2192	16.6602	11.2326	8.21579	4.93461	8.53593
930	20.79	21.43	40.773	13.133	14.576	28.026	18.748	23.651	12.401	11.444	14.429	11.182	18.052	33.16	14.413	13.166	9.526	12.789	27.6643	18.5783	15.3092	16.851	11.3569	8.21367	4.95211	8.45109
931	20.381	20.986	40.197	12.093	14.689	27.949	18.721	23.68	12.399	11.869	14.273	10.882	17.927	33.137	15.09	13.512	9.014	12.093	27.188	18.2437	15.304	16.7955	11.2702	8.5047	4.95356	8.54026
932	21.03	21.582	40.688	12.879	14.683	27.554	18.641	23.179	12.583	11.849	14.756	11.205	18.06	32.9	14.897	13.947	9.568	12.309	27.7667	18.372	15.3688	16.9468	11.1936	8.00284	4.68122	8.30542
933	20.855	22.684	40.566	13.692	14.731	27.894	18.644	23.364	12.071	11.997	15.425	11.708	18.003	33.244	14.531	13.749	9.32	12.247	28.035	18.7723	15.5348	16.849	10.8906	7.91666	4.69327	8.52027
934	20.902	21.07	40.86	13.347	14.795	27.966	18.668	23.35	12.681	11.626	14.627	11.605	17.948	33.758	15.036	13.767	9.381	12.13	27.6107	18.7027	15.4262	17.0033	11.4746	8.05489	4.70136	8.69258
935	19.052	21.387	40.427	13.087	14.474	28.065	18.594	23.459	12.402	10.867	13.711	10.474	17.994	33.451	15.077	13.017	9.434	12.092	26.9553	18.542	14.9178	16.8442	11.7251	8.27627	5.10702	8.62986
936	20.592	21.504	40.563	13.472	15.124	27.972	18.645	23.04	12.1	11.136	15.352	11.393	17.831	33.27	14.508	14.383	9.257	11.991	27.553	18.856	15.2777	16.8733	11.2762	7.93778	4.77368	8.52537
937	18.535	20.461	41.464	12.409	13.735	27.74	18.658	23.746	11.621	10.894	13.925	11.367	17.782	33.304	14.072	12.314	8.178	11.399	26.82	17.9613	15.0352	16.1748	12.7186	8.49449	5.14776	8.96747
938	20.485	21.109	40.855	11.564	14.317	27.831	18.588	22.78	10.65	10.573	13.473	11.38	17.652	33.472	12.347	13.62	9.435	12.261	27.483	17.904	14.574	16.4645	11.5847	8.70653	5.02534	8.74978
939	20.826	21.343	39.878	11.962	13.511	27.27	18.391	22.394	12.571	10.628	14.071	10.8	17.61	33.462	13.798	12.737	8.907	10.155	27.349	17.581	14.8092	16.1115	10.8535	8.42659	4.67908	9.02673
940	20.826	19.841	39.827	13.227	15.056	26.545	18.224	22.513	10.763	11.726	15.103	9.756	17.451	32.442	13.898	13.039	9.006	11.492	26.8313	18.276	14.6808	16.2213	11.2653	7.21932	4.94792	8.4211
941	18.544	18.644	39.967	11.117	14.008	26.56	17.884	22.2	10.913	9.771	13.061	9.172	17.289	32.145	11.066	12.463	7.527	11.067	25.7183	17.2283	13.8335	15.2595	12.3398	8.20972	5.17232	8.85453
942	20.686	20.74	39.943	12.684	13.99	27.168	17.655	22.476	10.587	10.452	14.154	11.649	17.236	32.276	13.439	13.119	8.601	10.724	27.123	17.9473	14.4955	15.8992	11.1025	8.01199	4.76479	8.53012
943	19.323	18.878	41.21	13.493	13.604	27.102	17.957	22.145	11.222	10.217	13.326	8.773	17.37	31.924	14.5	11.771	8.773	9.883	26.4703	18.0663	13.94	15.7035	12.7669	7.82531	5.13384	8.54055
944	19.767	20.1	39.535	11.771	13.326	26.549	17.703	22.259	12.137	10.161	13.104	9.772	17.145	32.543	12.934	12.937	9.439	11.216	26.4673	17.2153	14.1893	16.0357	11.3182	8.1205	4.87023	8.48163
945	20.403	20.783	40.334	11.589	13.003	26.87	17.741	22.279	11.601	10.555	13.874	11.045	16.927	32.696	14.166	12.731	8.052	11.153	27.1733	17.154	14.5158	15.9542	11.3991	8.44395	4.63274	8.72144
946	19.778	20.622	40.243	12.078	14.135	27.216	17.762	22.171	10.842	11.234	14.768	9.177	17.225	33.165	13.368	14.135	9.072	10.179	26.881	17.8097	14.3257	16.1907	11.5795	8.21079	4.9347	8.81143
947	19.92	21.479	39.589	12.425	13.984	27.69	17.812	22.722	12.155	10.463	15.694	10.815	17.307	32.004	12.666	14.336	8.903	11.217	26.996	18.033	14.9435	16.0722	10.9337	8.39946	4.77895	8.30583
948	21.009	21.499	39.862	12.145	13.32	27.601	17.865	21.826	9.767	9.549	14.104	10.48	17.566	32.211	12.682	12.194	7.982	9.941	27.4567	17.6887	13.9318	15.4293	10.7461	8.60441	5.02568	8.82938
949	19.306	18.704	40.107	10	11.713	27.129	18.276	21.965	11.617	9.63	12.685	8.935	17.492	33.008	14.272	10.972	7.361	10.324	26.039	16.2807	13.8513	15.5715	12.187	9.43389	5.17208	9.2251
950	18.853	20.287	39.417	11.381	13.684	27.515	18.121	21.936	10.924	10.99	13.771	8.254	17.543	33.05	14.343	12.25	8.558	10.556	26.1857	17.5267	13.9993	16.05	11.4811	8.72646	5.1294	8.88704
951	20.869	20.741	40.003	12.053	13.118	27.386	18.266	22.213	10.746	10.221	14.14	10.094	17.409	33.068	13.401	12.266	8.859	10.903	27.2043	17.519	14.28	15.9843	11.0842	8.56165	5.00655	8.84275
952	20.847	20.969	41.283	12.256	14.088	28.312	18.096	22.764	11.606	11.564	14.454	11.482	17.396	33.842	13.977	12.256	9.406	10.22	27.6997	18.2187	14.9943	16.1828	11.7637	8.78895	4.6014	9.11136
953	20.046	20.161	40.796	12.634	14.247	27.548	18.181	22.023	11.312	11.751	14.862	11.252	17.219	33.44	13.813	12.404	9.101	10.522	27.001	18.143	14.8968	16.0832	11.947	8.1848	4.41817	8.95452
954	20.226	20.371	41.213	12.841	13.932	27.814	18.333	22.274	11.534	10.331	14.842	11.022	17.487	33.088	14.776	13.278	9.494	11.459	27.27	18.1957	14.7227	16.597	12.0752	8.34756	4.75858	8.53146
955	20.595	21.383	40.554	12.822	13.789	28.784	18.45	22.8	11.203	11.39	14.47	10.064	17.507	33.346	13.171	13.037	8.56	11.211	27.5107	18.465	14.7295	16.1387	11.3027	8.94959	4.98794	8.92312
956	20.027	20.541	40.51	12.564	14.481	27.856	18.546	22.398	10.77	11.263	14.242	10.373	17.555	33.307	13.803	13.865	9.688	11.229	27.026	18.3003	14.5987	16.5745	11.6803	8.33077	4.90265	8.62507
957	20.094	20.729	41.002	11.802	13.975	27.603	18.066	22.841	11.05	11	13.842	11.401	17.315	33.251	13.37	12.17	8.76	10.364	27.275	17.7933	14.7	15.8717	11.8922	8.56462	4.82157	8.99995
958	20.208	19.471	40.228	12.131	13.84	28.273	18.485	21.982	11.141	10.891	14.109	10.791	17.68	33.483	14.121	12.701	8.277	11.629	26.6357	18.0813	14.5665	16.3152	11.7771	8.86751	4.69151	8.95596
959	20.687	21.693	40.76	12.192	15.499	28.678	18.311	22.723	10.775	10.895	14.494	11.608	17.809	34.065	13.737	13.813	9.663	11.187	27.7133	18.7897	14.801	16.7123	11.3099	8.72172	4.83391	8.94202
960	20.387	21.914	39.859	13.092	14.744	28.211	18.294	22.122	10.461	11.627	14.807	10.505	17.581	33.034	13.884	13.498	8.603	11.721	27.3867	18.6823	14.636	16.3868	10.8283	8.2933	4.75395	8.66628
961	20.631	20.886	40.281	12.628	14.828	27.966	18.475	22.624	12.001	10.81	15.019	10.682	17.582	33.766	14.304	13.042	8.769	10.364	27.266	18.474	14.9352	16.3045	11.272	8.29358	4.80357	9.09126
962	20.254	21.971	40.509	13.037	14.022	28.054	18.545	22.226	11.18	11.828	14.944	11.097	17.639	33.599	14.013	14.149	9.666	10.779	27.578	18.371	14.97	16.6408	11.2314	8.40017	4.57531	8.77154
963	20.768	20.8	40.495	13.117	14.834	28.24	18.345	22.973	11.617	11.368	14.022	11.243	17.404	34.006	13.88	13.741	9.244	11.493	27.3543	18.7303	14.928	16.628	11.3802	8.28024	4.78402	8.93728
964	20.145	20.387	40.1	13.38	14.799	28.353	18.109	22.661	11.043	12.655	14.588	11.537	17.463	34.001	14.765	12.806	9.453	12.383	26.8773	18.844	15.0988	16.8118	11.4518	8.26554	4.50815	8.83057
965	19.778	21.475	39.868	12.866	15.026	28.576	18.295	22.88	10.058	11.385	15.52	11.478	17.479	34.284	14.889	13.576	9.04	12.033	27.0403	18.8227	14.936	16.8835	11.1414	8.5154	4.96172	8.97884
966	21.23	22.157	41.027	12.763	14.431	28.557	18.312	22.697	11.9	11.959	14.833	11.805	17.548	33.705	14.637	13.412	8.189	11.867	28.138	18.5837	15.251	16.5597	11.1718	8.67733	4.44812	8.95135
967	20.326	19.39	40.399	12.262	13.561	28.39	18.384	22.503	11.477	10.42	14.527	10.722	17.527	33.699	14.557	14.135	8.819	10.812	26.705	18.071	14.6722	16.5915	11.8686	8.96009	4.87882	8.91661
968	20.538	21.837	40.505	12.403	15.435	28.6	18.485	22.272	12.376	11.63	14.476	12.063	17.441	34.022	14.113	14.29	9.094	12.001	27.6267	18.8127	15.217	16.8268	11.1719	8.61059	4.2869	8.86495
969	20.856	21.07	40.571	12.508	14.434	28.173	18.27	22.141	11.942	11.56	15.902	11.896	17.341	34.093	13.635	13.609	8.654	11.468	27.499	18.3717	15.2852	16.4667	11.3212	8.54266	4.30888	9.09573
970	20.217	20.28	39.926	12.733	14.255	28.098	18.23	22.466	11.807	11.46	15.559	10.87	17.591	33.612	15.221	13.82	9.037	12.112	26.8077	18.362	15.0653	16.8988	11.3609	8.4659	4.60966	8.68131
971	19.956	20.707	40.39	13.638	14.639	28.675	18.226	22.558	11.697	10.885	15.077	11.386	17.476	34.053	13.537	14.326	9.259	11.605	27.0177	18.984	14.9715	16.7093	11.5869	8.40756	4.65694	8.92968
972	20.098	20.622	40.338	13.481	14.466	28.681	18.209	22.808	11.836	11.881	15.42	10.649	17.461	33.413	15.129	13.296	7.972	10.803	27.0193	18.876	15.1338	16.3457	11.5373	8.50565	4.69045	8.99064
973	19.963	20.863	40.071	12.605	14.499	28.29	17.971	22.101	11.544	11.115	15.523	10.463	17.456	33.526	15.166	14.374	8.289	11.829	26.9657	18.4647	14.7862	16.7733	11.3585	8.56152	4.62324	8.78508
974	18.053	21.411	40.396	11.892	14.633	28.664	18.188	22.638	11.303	10.844	15.404	11.614	17.438	34.036	14.473	13.986	8.996	11.399	26.62	18.3963	14.9985	16.7213	12.0479	8.99706	4.71319	8.95384
975	21.058	22.842	40.616	12.589	15.217	28.563	18.419	22.076	11.265	11.356	15.25	12.362	17.602	33.555	14.709	14.147	10.026	12.135	28.172	18.7897	15.1213	17.029	10.8137	8.56534	4.37999	8.48668
976	18.668	20.357	40.185	12.329	13.38	27.844	18.125	22.264	11.821	10.736	14.049	10.959	17.642	34.109	14.077	13.093	8.219	11.851	26.4033	17.851	14.659	16.4985	11.9651	8.67013	4.63369	9.15476
977	18.554	21.2	40.185	12.488	14.908	28.785	18.405	22.919	10.995	10.81	13.779	10.294	17.463	33.824	14.038	13.52	8.938	11.649	26.6463	18.727	14.5337	16.572	11.7992	8.79412	5.10359	8.90702
978	19.896	21.424	39.819	13.296	14.694	28.071	18.357	22.071	11.262	11.736	15.54	11.216	17.506	33.681	14.872	13.427	9.233	11.021	27.0463	18.687	15.0303	16.6233	11.0878	8.15679	4.48329	8.84342
979	19.906	21.964	40.027	12.888	14.71	28.301	18.317	21.635	11.085	11.471	14.845	9.987	17.211	33.462	13.369	13.765	8.502	11.404	27.299	18.633	14.5567	16.2855	11.0707	8.42215	4.62129	8.88999
980	19.83	21.259	39.919	13.435	14.762	28.472	18.451	21.636	11.184	11.497	15.34	11.395	17.464	34.009	14.374	13.878	9.048	10.986	27.0027	18.8897	14.9172	16.6265	11.2087	8.32503	4.37834	8.997
981	20.205	20.788	40.037	13.322	14.041	28.329	18.019	22.195	11.066	10.925	14.726	10.993	17.419	33.621	14.402	13.253	9.555	10.308	27.01	18.564	14.654	16.4263	11.2855	8.46438	4.65569	8.89336
982	20.221	21.466	39.827	12.893	14.31	28.226	18.041	21.676	11.378	11.13	15.935	11.545	17.263	34.037	13.639	13.481	8.572	11.822	27.1713	18.4763	14.9508	16.469	10.9778	8.47313	4.35222	9.05714
983	19.809	20.763	39.664	12.399	14.013	27.469	18.408	22.171	11.099	10.712	15.077	11.152	17.398	33.16	14.322	13.059	8.804	10.675	26.7453	17.9603	14.7698	16.2363	11.1981	8.2742	4.71461	8.80554
984	21.268	21.34	39.895	13.823	13.573	28.959	18.375	22.268	10.443	10.403	12.825	12.006	17.335	34.041	13.519	13.894	8.728	11.792	27.501	18.785	14.3867	16.5515	10.7336	8.81183	4.84873	9.01792
985	19.985	21.421	39.118	12.771	14.98	27.805	18.3	21.596	10.571	11.226	15.605	10.931	17.408	33.963	13.789	13.765	9.165	11.925	26.8413	18.5187	14.7048	16.6692	10.6561	8.11769	4.57507	8.89013
986	20.522	20.748	39.804	12.132	14.626	27.79	18.315	21.832	10.734	10.506	14.777	12.245	17.324	33.883	14.765	13.946	8.692	11.829	27.0247	18.1827	14.7348	16.7398	11.0678	8.41312	4.54485	8.88616
987	20.786	20.976	40.606	12.357	13.12	28.967	18.304	22.056	10.675	10.488	14.188	10.679	17.481	34.352	15.25	12.357	9.306	10.984	27.456	18.148	14.3983	16.6217	11.3886	9.37729	4.83582	9.17032
988	19.222	18.497	39.957	11.785	12.471	27.778	17.885	21.299	10.991	10.526	15.065	10.946	17.187	33.887	15.31	12.319	7.971	9.802	25.892	17.3447	14.452	16.0793	12.186	9.04204	4.44357	9.36186
989	17.208	20.572	39.981	12.413	13.38	28.12	18.363	21.793	11.726	10.982	15.739	10.325	17.328	33.566	14.725	13.882	8.391	10.518	25.9203	17.971	14.8213	16.4017	12.2925	8.80258	4.6158	8.98243
990	20.08	21.637	39.758	12.854	14.331	28.569	18.23	21.767	11.938	12.375	15.729	11.697	17.389	34.057	13.527	13.413	9.062	11.816	27.1583	18.5847	15.2893	16.544	10.9394	8.67817	4.08487	8.99621
991	20.439	21.118	40.362	13.293	13.892	28.465	18.121	21.749	10.044	10.1	15.449	10.699	17.013	34.082	12.276	13.134	8.383	11.896	27.3063	18.55	14.3603	16.1307	11.3116	8.59186	4.90116	9.21766
992	20.341	19.732	39.536	11.571	14.089	28.661	18.255	21.591	9.77	10.678	14.779	10.069	17.173	34.405	14.071	13.764	8.932	9.622	26.5363	18.107	14.1903	16.3278	11.2622	9.22634	4.90916	9.36837
993	21.307	22.793	40.619	13.413	14.431	28.671	17.826	21.212	11.093	10.696	14.898	11.46	17.163	34.184	14.474	13.413	9.805	11.969	28.2397	18.8383	14.5308	16.8347	10.7465	8.53054	4.27985	8.84849
994	20.502	21.523	40.683	12.378	14.547	28.143	18.16	21.561	11.013	11.314	16.036	10.379	17.185	34.717	13.367	13.186	8.72	11.187	27.5693	18.356	14.7438	16.3937	11.3682	8.54489	4.57271	9.40016
995	19.743	20.171	39.085	11.092	13.576	28.135	17.986	21.331	11.168	11.306	15.717	10.407	17.084	33.546	15.12	13.276	9.079	10.278	26.333	17.601	14.6525	16.3972	11.0456	9.20687	4.43199	8.90985
996	19.127	20.454	39.319	12.323	13.051	28.248	18.053	21.8	11.55	10.355	15.832	11.125	17.473	33.626	13.826	12.794	8.729	10.141	26.3	17.874	14.7858	16.0982	11.2943	8.99152	4.57104	9.1103
997	19.91	20.448	39.987	13.946	14.753	28.341	18.067	21.857	11.171	11.435	15.561	11.076	17.114	35.022	14.087	13.587	7.848	12.735	26.7817	19.0133	14.8612	16.7322	11.4393	8.08807	4.45853	9.44943
998	18.926	20.792	39.242	12.102	14.331	27.615	17.94	20.981	10.733	11.51	14.877	9.691	17.184	34.221	13.372	14.24	8.781	10.601	26.32	18.016	14.2887	16.3998	11.2296	8.38735	4.47142	9.20559
999	19.88	22.97	38.965	12.823	13.976	27.893	18.146	20.987	10.521	11.531	14.576	11.116	17.544	33.17	13.507	14.483	9.594	11.762	27.2717	18.2307	14.4795	16.6767	10.2439	8.38766	4.2773	8.50834
1000	19.577	20.154	39.514	12.121	14.286	28.163	17.819	21.075	11.321	9.764	14.815	10.678	17.223	33.707	13.821	13.083	7.696	10.774	26.415	18.19	14.2453	16.0507	11.3477	8.70444	4.49666	9.21458
