# Supplementary material for: Molecular basis of wax-based color change and UV reflection in dragonflies
Source: eLife. 2019 Jan 15;8:e43045. doi: 10.7554/eLife.43045 (PMC6353593; doi:10.7554/eLife.43045)
Supplement: Figure 2—source data 6. [file elife-43045-fig2-data6.xlsx]

## Sheet: OalbistylumAged-CRAIC
	Male	Male	Male	Male	Male	Male	Male	Male	Male	Male	Male	Male	Male	Male	Male	Male	Male	Male	Male	Male	Male	Male	Male	Male	Male	Male	Male	Male	Male	Male	Male	Female	Female	Female	Female	Female	Female	Female	Female	Female	Female	Female	Female	Female	Female	Female	Female	Female	Female
wavelength	M5D1-1	M5D1-2	M5D1-3	M5D1-4	M5D1-5	M5D1-6	M5D1-7	M5D1-8	M5D2-1	M5D2-2	M5D2-3	M5D2-4	M5D3-1	M5D3-2	M5D3-3	M5D3-4	M5V1-1	M5V1-2	M5V1-3	M5V1-4	M5V1-5	M5V2-1	M5V2-2	M5V2-3	M5V2-4	M5V2-5	M5V3-1	M5V3-2	M5V3-3	M5V3-4	M5V3-5	F5D1-1	F5D1-2	F5D1-3	F5D1-4	F5D1-5	F5D2-1	F5D2-2	F5D2-3	F5D2-4	F5D2-5	F5D3-1	F5D3-2	F5D3-3	F5D3-4	F5D3-5	F5D4-1	F5D4-2	F5D4-3
380	52.3474	53.6879	52.1031	51.8565	55.6362	52.941	50.6659	51.6845	54.1845	62.6238	67.6644	62.0136	63.6479	62.8407	63.1886	56.8014	42.5884	26.5014	32.1843	37.6291	33.3653	30.1626	44.9343	55.9601	50.8374	60.2661	51.479	51.8995	35.5562	37.1763	32.9961	26.3665	25.2974	27.14	15.9592	25.5082	25.2111	29.8551	32.328	22.6505	27.3795	28.4094	29.1583	30.1386	30.7154	30.7522	35.6065	28.4916	37.5294
381	52.2398	53.5118	51.7107	51.5872	55.5	52.6821	50.3897	51.4988	53.9603	62.3477	67.4613	61.7786	63.2939	62.4906	62.748	56.5598	42.017	26.2368	32.2224	37.0933	32.9204	29.9148	44.5944	55.9207	50.5057	60.0263	50.9852	51.5229	35.2841	36.8924	32.5427	25.9489	24.8197	26.696	15.5155	25.1354	25.182	29.7651	32.1318	22.6019	27.5973	28.0649	28.9294	29.8908	30.4158	30.5046	35.4747	28.1712	37.2112
382	52.3134	53.4976	51.7198	51.6639	55.4809	52.893	50.2426	51.2947	54.04	61.9486	67.0017	61.1615	62.7995	61.9313	62.3248	56.1374	42.0147	26.1583	32.1642	36.9972	32.7363	29.6251	44.4072	55.5964	50.0312	59.8187	50.6743	50.9045	34.845	36.5271	32.2245	25.803	24.6208	26.4435	15.3698	24.8675	24.8061	29.4771	31.8932	22.3247	27.4692	27.9857	28.7979	29.6382	30.1307	30.3759	35.1455	27.816	36.8647
383	52.3268	53.3588	51.7636	51.636	55.5235	52.786	50.0638	51.2732	54.0723	61.7652	66.7814	60.7907	62.335	61.5496	61.9424	55.7688	41.8326	26.3292	32.1086	37.0903	32.6826	29.3467	44.0443	55.2812	49.686	59.5125	50.2952	50.4978	34.2088	35.9556	32.0534	25.5872	24.4505	26.3445	15.162	24.5702	24.5352	29.1959	31.5525	22.0825	27.2615	27.8588	28.5992	29.579	29.9387	30.1035	34.8509	27.303	36.7797
384	52.413	53.2459	51.6064	51.6295	55.431	52.5703	49.9637	51.2787	54.2858	61.4583	66.8072	60.6573	61.8761	61.4499	61.479	55.4703	41.6781	26.3656	32.1838	37.0979	32.7146	29.1631	43.5565	55.2669	49.3504	59.2783	49.9101	50.1304	33.6062	35.4384	31.7879	25.2021	24.3921	26.1493	14.8926	24.3293	24.2615	29.0807	31.3332	22.0568	27.0865	27.5744	28.3612	29.3785	29.7516	29.8566	34.455	26.9785	36.3999
385	52.0538	52.8758	51.2978	51.3124	55.2972	52.212	49.7158	50.9596	54.0538	60.9163	66.5343	60.1467	61.4426	61.1793	60.9407	55.0514	41.2969	26.0345	31.8883	36.8482	32.3074	28.9764	43.1963	55.1428	49.1558	58.929	49.4977	49.6771	33.0848	34.9969	31.3868	24.7861	23.9691	25.6769	14.3778	23.8755	24.0087	28.8432	30.9627	21.8515	26.7768	27.1804	28.0202	28.9328	29.3252	29.56	33.9842	26.5487	35.9643
386	51.6181	52.4358	51.0213	50.8688	54.986	51.8975	49.3682	50.5354	53.8254	60.1969	66.1576	59.5861	60.896	60.518	60.4745	54.486	40.7884	25.9442	31.7489	36.4796	31.9215	28.6817	42.7857	54.7475	48.7446	58.3998	48.8947	48.7626	32.5142	34.3372	30.8877	24.3817	23.5441	25.1555	14.0481	23.535	23.8232	28.5727	30.53	21.4824	26.4711	26.6946	27.5129	28.5199	28.889	29.1534	33.5198	26.0225	35.6399
387	51.431	52.1742	50.7242	50.656	54.8178	51.9605	49.093	50.2407	53.9927	59.9075	65.8032	59.3416	60.5659	60.1493	60.0605	54.1352	40.5751	25.9884	31.992	36.2879	31.8436	28.3932	42.5572	54.6439	48.2885	58.1408	48.4187	48.2724	32.2254	33.9441	30.5546	24.171	23.2947	24.8757	13.9607	23.4733	23.6264	28.3603	30.2337	21.3469	26.2737	26.4468	27.0168	28.2809	28.5082	28.7937	33.2111	25.6247	35.168
388	51.2885	52.0861	50.633	50.5651	54.7633	51.7381	49.0975	50.2106	54.0092	59.6632	65.6187	58.9969	60.3258	60.0109	59.827	54.0661	40.4446	25.9788	32.0861	36.3322	31.7845	28.1366	42.5069	54.6094	48.0201	58.1109	48.2396	48.1342	32.0091	33.6534	30.3701	24.0382	23.0061	24.6699	13.8823	23.3537	23.4233	28.2004	30.0956	21.204	26.1328	26.3495	26.7692	28.0429	28.358	28.6156	32.9813	25.4709	35.0002
389	51.2663	51.9477	50.4614	50.4504	54.6835	51.4913	48.948	50.0493	54.1391	59.7018	65.6763	59.056	60.1643	59.9507	59.8411	53.984	40.1034	25.9872	31.9745	36.1616	31.6653	28.1555	42.3592	54.8098	47.9223	57.901	48.1826	47.8777	31.8066	33.4836	30.283	23.8659	22.8772	24.364	13.7005	23.0744	23.411	28.1987	30.0079	21.22	26.1607	26.2399	26.7702	28.0453	28.3873	28.6167	32.7976	25.3709	34.9629
390	51.0367	51.7057	50.1866	50.3374	54.6135	51.5689	48.7889	49.9413	54.2357	59.696	65.5865	59.0965	60.047	59.7683	59.6979	53.941	39.7972	25.9437	32.0018	35.927	31.4917	28.1829	42.1924	54.9555	47.8782	57.7362	48.0202	47.6549	31.594	33.3237	30.2418	23.7134	22.719	24.2846	13.5724	23.0128	23.4201	28.172	29.9678	21.2551	26.3078	26.2435	26.7745	28.0538	28.3312	28.5184	32.8206	25.3188	34.9248
391	50.8255	51.6254	50.2379	50.2917	54.4543	51.5217	48.7618	49.7151	54.4222	59.3837	65.4364	58.8713	59.8055	59.5252	59.439	53.6546	39.8168	25.7454	32.0982	35.7943	31.3253	28.1799	42.056	54.8928	47.6967	57.6613	47.7895	47.5052	31.4309	33.1136	30.0513	23.5915	22.5434	24.1199	13.4129	22.9708	23.2952	28.095	29.8549	21.1577	26.1758	26.2247	26.48	28.0932	28.2856	28.4031	32.5964	25.217	34.8187
392	51.0119	51.7007	50.2446	50.2143	54.5849	51.5808	48.789	49.6313	54.6329	59.241	65.3444	58.8404	59.6181	59.3871	59.2257	53.5061	39.771	25.8866	32.1538	35.7807	31.3451	28.306	42.0608	54.8495	47.6848	57.6803	47.7804	47.4024	31.4151	32.9743	29.9321	23.4756	22.4348	24.0619	13.4291	23.0772	23.2263	27.9512	29.794	21.1863	26.0323	26.2817	26.2784	28.1478	28.3072	28.3229	32.4005	25.0108	34.7408
393	51.0253	51.6025	50.022	50.1322	54.7607	51.4757	48.7498	49.6589	54.7201	59.1669	65.1722	58.6529	59.4255	59.2204	58.9413	53.3798	39.6752	25.9083	32.1289	35.6887	31.3873	28.2366	41.9331	54.7283	47.5278	57.4995	47.6718	47.1467	31.3122	32.8079	29.8706	23.486	22.4834	23.9924	13.4379	23.0555	23.1592	27.8227	29.7137	21.1997	25.9197	26.1342	26.1797	28.0799	28.2391	28.1717	32.2023	24.8007	34.6838
394	50.9319	51.4799	49.9096	50.1023	54.7211	51.2677	48.6571	49.6391	54.6767	58.9997	65.0006	58.3786	59.1751	58.8468	58.7311	53.1835	39.5461	25.87	32.2872	35.6605	31.4236	28.0978	41.6697	54.5207	47.2212	57.1969	47.2959	46.8254	31.1564	32.4691	29.5973	23.436	22.3874	23.8555	13.403	22.9929	23.024	27.7411	29.4274	21.1288	25.688	25.9448	26.0211	27.9677	28.026	28.0015	31.9502	24.5021	34.5208
395	50.6972	51.1834	49.8126	49.8972	54.4484	51.1489	48.6299	49.4314	54.7398	58.8987	64.7747	58.2175	59.0095	58.7419	58.4858	52.9772	39.2991	25.9637	32.435	35.5169	31.27	28.0858	41.5005	54.4577	47.1458	57.0705	47.1032	46.5873	30.9986	32.3552	29.4409	23.2494	22.3309	23.75	13.23	22.9134	22.9162	27.682	29.1902	20.9892	25.5899	25.7668	25.7739	27.8117	28.0219	27.8288	31.7433	24.3849	34.4038
396	50.7119	51.0812	49.9396	49.7932	54.4804	51.196	48.8582	49.4198	54.7965	58.605	64.7004	58.2414	58.8425	58.6491	58.2873	52.7296	39.3975	26.0936	32.4989	35.6095	31.4322	28.101	41.4112	54.6086	47.0031	57.0619	47.0011	46.3604	30.8182	32.1994	29.4557	23.2628	22.2914	23.689	13.1286	22.9292	22.911	27.6082	29.0692	20.9559	25.5793	25.606	25.6208	27.8094	28.0022	27.7931	31.5998	24.325	34.3002
397	50.6345	51.089	49.7628	49.7854	54.492	51.1798	48.7688	49.4339	54.8175	58.4325	64.6252	58.1859	58.4746	58.4292	57.993	52.4321	39.5057	26.1617	32.5244	35.5653	31.5028	28.0644	41.2726	54.4216	46.7613	57.0308	46.8302	46.1828	30.4411	31.9661	29.3394	23.0436	22.1804	23.6262	13.0316	22.9458	22.8239	27.4737	28.9974	20.9392	25.5328	25.4186	25.5379	27.8283	27.9859	27.6775	31.452	24.1526	34.2242
398	50.5573	51.0549	49.6277	49.6424	54.4944	51.0615	48.7531	49.4478	55.0133	58.3271	64.6258	58.0439	58.2538	58.197	58.0087	52.2932	39.4613	26.2326	32.5688	35.4425	31.5556	27.9521	41.1745	54.3422	46.6533	56.8233	46.7509	45.964	30.3544	31.8465	29.245	22.9763	22.143	23.44	12.9711	22.9291	22.7219	27.5482	28.9038	20.9138	25.5116	25.2305	25.4975	27.7875	28.0261	27.6904	31.3271	24.006	34.1618
399	50.5122	50.982	49.3898	49.3314	54.4147	51.1135	48.729	49.3845	55.2433	58.1455	64.7665	57.9052	58.2003	58.0697	57.8298	52.2454	39.3916	26.2786	32.5779	35.3314	31.5896	27.8994	41.0073	54.1917	46.6039	56.6521	46.5494	45.7771	30.3407	31.7714	29.0697	22.9076	21.9944	23.2502	12.8418	22.9341	22.6403	27.5867	28.8675	20.9493	25.4997	25.1915	25.4229	27.8398	27.9836	27.6395	31.2303	23.9518	34.0944
400	50.4449	50.8487	49.3402	49.3237	54.386	51.0595	48.6922	49.2983	55.2131	57.8486	64.8232	57.7282	58.0308	57.8132	57.5361	52.074	39.2806	26.3663	32.6412	35.2703	31.5139	27.8365	40.8473	53.9827	46.4457	56.4438	46.3705	45.5587	30.1969	31.545	28.842	22.8299	21.9611	23.2746	12.8163	22.9377	22.5159	27.4393	28.804	20.8865	25.386	24.9962	25.3012	27.7677	27.9175	27.4844	31.0353	23.8374	34.1055
401	50.3593	50.576	49.2624	49.2938	54.2685	50.867	48.6216	49.1181	55.1944	57.5435	64.7279	57.5097	57.8527	57.4528	57.3169	51.8379	39.1721	26.2899	32.6719	35.0082	31.4078	27.8546	40.5198	53.8496	46.139	56.2071	46.1277	45.3906	29.9422	31.2286	28.7335	22.6069	21.9216	23.1227	12.6776	22.7812	22.4663	27.2982	28.6607	20.7966	25.2752	24.8726	25.1069	27.6736	28.0065	27.3857	30.7845	23.6146	34.0391
402	50.2944	50.4746	49.2279	49.311	54.2332	50.8229	48.6455	49.1567	55.2159	57.4292	64.6942	57.2781	57.6231	57.2864	57.1489	51.6791	39.2901	26.3456	32.8058	34.9531	31.4257	27.8929	40.343	53.8183	46.0008	56.0984	45.9185	45.184	29.7581	31.0113	28.7057	22.5422	21.7518	23.0892	12.6291	22.7122	22.394	27.2627	28.4782	20.7734	25.2478	24.6894	25.0397	27.63	28.1184	27.369	30.648	23.4795	33.955
403	50.1635	50.2776	48.9849	49.2384	54.1284	50.7715	48.5877	49.0391	55.1598	57.0649	64.5948	57.0257	57.2813	56.9837	56.8748	51.325	39.2389	26.312	32.838	34.8194	31.4469	27.6603	40.2249	53.5836	45.7009	55.8562	45.6104	44.9254	29.5806	30.8483	28.5323	22.3614	21.5751	22.8246	12.5773	22.5879	22.2208	27.2513	28.3645	20.7703	25.1784	24.4777	24.8745	27.525	28.0839	27.2617	30.3892	23.2759	33.8306
404	49.9987	50.2021	48.7964	49.0162	54.0385	50.6376	48.6148	48.838	55.118	56.8563	64.5411	56.8328	57.0239	56.7645	56.4756	50.8813	39.0502	26.2983	32.8673	34.6429	31.3713	27.5385	39.898	53.4263	45.5101	55.5432	45.4217	44.5704	29.3927	30.6316	28.3281	22.1617	21.3821	22.5826	12.4674	22.5389	22.1483	27.2143	28.3706	20.7673	25.1915	24.2749	24.7003	27.534	27.9473	27.1098	30.3167	23.0781	33.8565
405	49.9248	50.1608	48.7469	48.8535	53.8883	50.5085	48.5657	48.836	55.2646	56.8102	64.5883	56.6423	56.94	56.6366	56.2988	50.6515	38.9624	26.3197	33.115	34.5604	31.3314	27.6204	39.7099	53.4789	45.3663	55.566	45.2225	44.366	29.3829	30.4662	28.2518	21.9393	21.302	22.3902	12.332	22.5012	22.2006	27.2876	28.3433	20.8149	25.2453	24.1902	24.75	27.5926	28.0385	27.0605	30.3015	23.1059	33.9349
406	49.9237	49.9981	48.6013	48.6649	53.6928	50.4752	48.4554	48.7399	55.3551	56.7055	64.6181	56.5868	56.781	56.5465	56.1893	50.6474	38.8786	26.3891	33.2873	34.5227	31.3189	27.7521	39.7013	53.5636	45.2024	55.5702	45.1421	44.3391	29.3635	30.3596	28.2534	21.8304	21.2021	22.3524	12.311	22.3703	22.1547	27.2821	28.2977	20.9616	25.231	24.1093	24.753	27.628	28.1232	27.0321	30.2101	23.091	33.956
407	49.8998	49.8552	48.3898	48.5327	53.6433	50.4594	48.5152	48.6648	55.1722	56.4679	64.3745	56.4312	56.4893	56.2536	56.0208	50.3717	38.8197	26.4014	33.2975	34.4374	31.3519	27.7004	39.5475	53.429	44.9595	55.25	44.9378	44.0844	29.0814	30.0978	28.0838	21.7326	21.104	22.2903	12.2327	22.3148	21.9525	27.0461	28.1713	20.9137	25.0055	23.8671	24.5641	27.5346	28.0539	26.8654	29.9744	22.9458	33.8215
408	49.8205	49.7022	48.2163	48.427	53.5988	50.2896	48.4624	48.5823	55.1321	56.257	64.1964	56.1984	56.2597	56.0002	55.7527	50.0663	38.7718	26.3811	33.2232	34.319	31.2718	27.6421	39.4595	53.2764	44.7949	55.1275	44.6546	43.8288	28.8407	29.8511	27.8985	21.6034	20.9233	22.1066	12.1284	22.2619	21.8691	26.9982	27.9829	20.8707	24.8481	23.6931	24.4378	27.4777	27.9944	26.8368	29.7844	22.8212	33.7227
409	49.68	49.5084	48.0512	48.2465	53.433	50.0757	48.3494	48.3609	55.0514	56.0315	63.9937	55.8613	55.9758	55.7146	55.5215	49.8033	38.6319	26.2464	33.1884	34.2157	31.2137	27.5691	39.2225	53.0785	44.6404	54.9056	44.3535	43.5584	28.6409	29.6231	27.6158	21.4193	20.677	21.8465	12.0065	22.1274	21.8089	26.9722	27.9052	20.833	24.7408	23.5942	24.2891	27.3752	27.9291	26.7774	29.6397	22.6337	33.6166
410	49.7172	49.4095	48.0792	48.1902	53.3407	50.0078	48.3681	48.2468	55.0202	55.9283	63.8773	55.676	55.8141	55.4482	55.3474	49.6749	38.5106	26.2065	33.3532	34.1349	31.206	27.5514	39.0855	52.9929	44.5089	54.6582	44.2214	43.3435	28.5746	29.5117	27.4015	21.1981	20.6231	21.712	11.948	22.0561	21.818	26.8561	27.8856	20.8554	24.7011	23.5037	24.1483	27.2961	27.9287	26.7124	29.5389	22.5526	33.5914
411	49.6938	49.2611	48.0901	48.107	53.2642	49.9252	48.2976	48.2433	54.961	55.6708	63.7767	55.4707	55.5338	55.2194	55.0331	49.4127	38.4376	26.28	33.408	33.9948	31.1772	27.4378	38.9565	52.9023	44.2998	54.451	44.004	43.1469	28.4409	29.3005	27.2199	21.0467	20.5786	21.5744	11.8474	21.9561	21.7614	26.6457	27.7596	20.8033	24.6742	23.3564	24.066	27.1467	27.8427	26.6202	29.3401	22.425	33.4541
412	49.5463	49.1262	47.9973	47.9923	53.0699	49.7888	48.1894	48.1359	54.8677	55.4401	63.6096	55.3616	55.3313	54.991	54.8325	49.1684	38.3262	26.3457	33.3996	33.8766	31.1571	27.3838	38.8341	52.7993	44.1	54.3458	43.8291	42.9442	28.3222	29.1264	27.0523	20.9515	20.4709	21.4615	11.8061	21.922	21.6872	26.5419	27.6267	20.7743	24.5797	23.2077	23.972	27.1248	27.7412	26.601	29.17	22.2986	33.314
413	49.3686	48.9748	47.8335	47.7914	52.8681	49.6461	48.0309	48.043	54.7504	55.3722	63.6203	55.2296	55.2116	54.787	54.7989	48.9673	38.2085	26.2775	33.4332	33.8239	31.1068	27.3784	38.7868	52.7208	43.9683	54.2917	43.7223	42.7646	28.2686	29.1111	26.9308	20.8245	20.3733	21.375	11.7532	21.8535	21.6408	26.5314	27.5981	20.7262	24.4612	23.0952	23.9678	27.0845	27.7068	26.5954	29.0539	22.229	33.2426
414	49.3566	48.8332	47.6205	47.677	52.8587	49.6159	48.0776	48.0126	54.6791	55.27	63.5168	55.1152	55.1495	54.6354	54.6841	48.8162	38.2169	26.2701	33.5869	33.8185	31.0837	27.4277	38.7386	52.7413	43.7921	54.1442	43.5972	42.7149	28.2172	29.0134	26.8136	20.7152	20.3197	21.3169	11.7045	21.8283	21.6024	26.5334	27.6064	20.7547	24.3549	22.9767	23.9455	26.9858	27.6757	26.5746	29.0146	22.2063	33.2141
415	49.2473	48.7495	47.5028	47.6174	52.8076	49.5784	48.0645	47.958	54.7507	55.1029	63.4032	54.9882	55.0438	54.5084	54.5053	48.6434	38.1201	26.2386	33.6535	33.6937	30.9859	27.4182	38.6792	52.6538	43.5589	54.0566	43.4579	42.6715	28.1504	28.723	26.6881	20.6373	20.2176	21.1894	11.627	21.8073	21.4842	26.4479	27.5199	20.6995	24.3043	22.8747	23.8162	26.8859	27.5657	26.4483	28.8333	22.0716	33.0944
416	49.1933	48.6448	47.3898	47.5588	52.5621	49.4798	47.992	47.8511	54.8039	55.0041	63.2602	54.8105	54.8046	54.3514	54.3202	48.3972	37.9853	26.262	33.6803	33.5509	30.9027	27.3491	38.5339	52.4906	43.335	53.929	43.2086	42.5792	28.0484	28.4815	26.5507	20.5353	20.0357	21.0338	11.551	21.7417	21.364	26.3126	27.3026	20.5691	24.1232	22.7447	23.6292	26.7454	27.3998	26.3097	28.5926	21.9217	32.9132
417	49.0658	48.4932	47.2776	47.3199	52.3076	49.237	47.7947	47.6493	54.8143	54.8861	63.1901	54.7453	54.7278	54.1995	54.2868	48.2209	37.7842	26.1555	33.6081	33.4604	30.8668	27.3015	38.4336	52.4101	43.2271	53.859	43.1034	42.5737	27.8983	28.3431	26.3826	20.3764	19.8727	20.8433	11.5081	21.6269	21.2604	26.1444	27.1534	20.4512	23.9583	22.6507	23.5132	26.6029	27.2904	26.2519	28.4001	21.7577	32.7829
418	48.9715	48.4096	47.1461	47.1757	52.2154	49.1042	47.6431	47.5838	54.8052	54.7564	63.1528	54.7028	54.5793	54.1399	54.2055	48.1227	37.6618	26.0788	33.576	33.4046	30.7662	27.2321	38.3614	52.4243	43.113	53.7202	42.9613	42.5149	27.7889	28.2966	26.215	20.206	19.7403	20.695	11.3933	21.5068	21.1584	26.0411	27.085	20.3876	23.8388	22.5379	23.4273	26.5086	27.2103	26.1503	28.3281	21.6753	32.7004
419	48.9122	48.2875	47.1025	47.1651	52.126	49.0584	47.558	47.4967	54.8096	54.6133	63.0609	54.5503	54.4568	53.9946	54.1094	47.9487	37.5776	26.1002	33.518	33.3705	30.6784	27.1631	38.2461	52.3607	42.8491	53.6136	42.7955	42.4201	27.6628	28.1002	26.0185	20.1444	19.6694	20.58	11.3533	21.4438	21.0358	25.8359	26.9713	20.2684	23.7058	22.3716	23.2941	26.3759	27.085	25.8817	28.158	21.5652	32.5242
420	48.6974	48.1496	46.9608	47.021	51.9994	48.9544	47.4168	47.3828	54.6945	54.2745	62.9792	54.329	54.2692	53.8584	53.8733	47.6957	37.517	26.0348	33.4534	33.2453	30.532	27.1387	38.1779	52.2385	42.6057	53.4247	42.4987	42.219	27.5286	27.9117	25.8391	20.0313	19.5416	20.4493	11.2707	21.3853	20.9531	25.7308	26.8263	20.1619	23.4868	22.1881	23.0721	26.2006	26.9464	25.6907	27.9644	21.3578	32.3328
421	48.5457	47.9755	46.7868	46.8956	51.8122	48.7593	47.2061	47.2745	54.7322	54.0832	62.858	54.0978	54.014	53.6976	53.7047	47.5426	37.3397	25.9407	33.2964	33.135	30.3881	27.0768	38.0954	52.1332	42.3718	53.3788	42.256	42.0765	27.4072	27.7696	25.6247	19.8454	19.3757	20.2268	11.1601	21.291	20.8459	25.6245	26.7198	20.0689	23.2731	22.0446	22.948	26.0451	26.807	25.6327	27.7806	21.2085	32.2094
422	48.4756	47.8824	46.6399	46.8085	51.6766	48.6685	47.0071	47.218	54.6957	53.9334	62.7986	53.9688	53.9318	53.5189	53.531	47.4336	37.2528	25.8509	33.2821	33.0037	30.2812	26.9849	37.9637	51.9645	42.1648	53.2666	42.103	41.9378	27.2923	27.6281	25.4186	19.7078	19.2222	20.084	11.1037	21.2484	20.7784	25.536	26.6751	20.0214	23.1036	21.975	22.8803	25.8704	26.5893	25.5203	27.6332	21.0707	32.0746
423	48.4487	47.7647	46.4875	46.7091	51.6582	48.5768	46.809	47.0642	54.6662	53.8299	62.8301	53.8536	53.9036	53.4177	53.4686	47.3449	37.1119	25.8091	33.2761	32.854	30.1993	26.896	37.85	51.854	42.0434	53.1577	41.9291	41.9444	27.2046	27.453	25.2708	19.6381	19.0194	19.9655	11.0143	21.1442	20.6653	25.446	26.5105	19.9338	22.9306	21.8965	22.7514	25.647	26.4385	25.3782	27.4418	20.9784	31.8663
424	48.3523	47.5761	46.4363	46.5909	51.6028	48.3192	46.6901	46.9132	54.6965	53.6487	62.6961	53.6551	53.7801	53.2126	53.2624	47.1719	36.8649	25.7004	33.1674	32.6731	30.0638	26.829	37.7011	51.7098	41.8138	52.9305	41.7204	41.8377	27.0431	27.165	25.0892	19.5187	18.8189	19.8321	10.9244	21.0493	20.5265	25.2918	26.2899	19.7635	22.7915	21.7696	22.5736	25.5263	26.2484	25.1822	27.1922	20.8214	31.5975
425	48.2993	47.4074	46.4129	46.5234	51.5056	48.1491	46.5455	46.8166	54.5192	53.3292	62.386	53.3717	53.4524	52.884	52.9256	46.8761	36.7919	25.634	33.1856	32.5172	29.9081	26.6693	37.4745	51.4335	41.4813	52.6452	41.4688	41.5647	26.8909	26.864	24.8145	19.3598	18.6748	19.6044	10.8283	21.0112	20.3397	25.0293	26.0613	19.597	22.5839	21.6156	22.3182	25.331	25.998	24.9733	26.9343	20.5522	31.288
426	48.248	47.3443	46.3404	46.3663	51.4107	48.075	46.4238	46.8085	54.3033	53.1118	62.2243	53.154	53.1691	52.7195	52.6537	46.574	36.6633	25.577	33.1298	32.4475	29.8109	26.4778	37.2786	51.2224	41.2408	52.3283	41.2453	41.3475	26.691	26.6599	24.5584	19.2737	18.5315	19.4808	10.7438	20.9651	20.157	24.8769	25.8775	19.4621	22.3389	21.4403	22.1328	25.0709	25.7046	24.7976	26.7198	20.3449	31.0609
427	48.0855	47.1003	46.1623	46.1688	51.2219	47.9875	46.2389	46.7146	54.1896	52.9399	62.0728	52.9433	52.9883	52.5794	52.4929	46.3775	36.4557	25.4332	32.9648	32.2671	29.603	26.3273	37.1419	51.1158	40.9827	52.0616	41.0901	41.1928	26.4948	26.4415	24.3549	19.0886	18.2982	19.3226	10.6445	20.7696	19.9527	24.7378	25.6429	19.3262	22.1021	21.2514	21.9362	24.858	25.4141	24.5925	26.5581	20.2408	30.9486
428	47.9681	46.849	46.0945	46.0339	51.1108	47.8166	46.0951	46.5438	54.1643	52.8288	61.999	52.8507	52.8756	52.3695	52.3832	46.2485	36.3164	25.3082	32.9782	32.1909	29.5345	26.2173	37.1084	51.0503	40.7867	51.979	41.0355	41.1034	26.3959	26.2816	24.1794	18.9132	18.1574	19.1696	10.5639	20.6313	19.8912	24.5375	25.5119	19.2164	21.9346	21.134	21.752	24.6515	25.2794	24.4619	26.3511	20.0593	30.7564
429	48.0078	46.7807	46.1189	45.9503	50.9393	47.6644	46.0051	46.4998	54.0297	52.5611	61.775	52.73	52.6373	52.0741	52.2028	45.996	36.2129	25.2211	32.9086	32.1121	29.4794	26.062	36.8449	50.8603	40.5362	51.8113	40.8597	40.9833	26.2127	26.0951	23.89	18.7751	17.9869	18.9976	10.5367	20.6038	19.7497	24.3027	25.3531	19.1226	21.7264	20.8994	21.5925	24.3991	25.0542	24.2553	26.1099	19.8046	30.4304
430	47.9236	46.6411	46.065	45.8153	50.7657	47.5354	45.8761	46.4214	53.9183	52.2992	61.5837	52.5243	52.4087	51.8207	51.9748	45.7842	36.1183	25.1296	32.8414	31.9331	29.3841	25.9184	36.6156	50.668	40.2625	51.6544	40.7049	40.7838	26.0215	25.8853	23.5963	18.5693	17.7912	18.8469	10.4113	20.4517	19.6415	24.1186	25.1725	18.9831	21.5459	20.7595	21.4273	24.1952	24.7556	23.9867	25.9084	19.5882	30.1407
431	47.708	46.4287	45.9731	45.7132	50.5497	47.3551	45.6935	46.2679	53.7321	51.9907	61.1553	52.2147	52.1077	51.462	51.7424	45.4801	35.9624	25.0018	32.7399	31.8094	29.2284	25.762	36.4287	50.3789	39.9591	51.3778	40.4258	40.501	25.7923	25.5826	23.3398	18.3956	17.6059	18.7312	10.3425	20.2812	19.4854	23.8999	24.8935	18.7697	21.3686	20.5503	21.1606	23.9357	24.4644	23.6794	25.641	19.4058	29.8463
432	47.5295	46.2446	45.8494	45.5023	50.2712	47.1621	45.4797	46.0658	53.4068	51.7022	60.6891	51.9254	51.838	51.1873	51.4344	45.143	35.7329	24.8639	32.5798	31.6114	29.0094	25.5393	36.2459	50.0778	39.6507	51.0142	40.0868	40.2526	25.5124	25.2469	23.0611	18.1694	17.4125	18.5312	10.2091	20.0797	19.2902	23.6528	24.6503	18.6396	21.1511	20.304	20.8922	23.66	24.1428	23.417	25.3886	19.2005	29.5252
433	47.406	46.1045	45.6831	45.4153	50.1223	47.08	45.3495	45.9281	53.2746	51.5285	60.4466	51.7477	51.6979	51.0642	51.2265	44.9875	35.5919	24.7805	32.4378	31.479	28.8599	25.4279	36.0883	49.9956	39.4996	50.9031	39.8899	40.0896	25.3308	25.0419	22.8495	18.0161	17.2741	18.3651	10.0977	19.9109	19.1608	23.555	24.4875	18.5355	20.9907	20.1456	20.7902	23.4622	23.9435	23.2428	25.2454	19.0325	29.2867
434	47.3063	46.0054	45.6265	45.3755	50.0294	46.9977	45.3223	45.7958	53.1091	51.2271	60.1563	51.5715	51.4303	50.92	51.0607	44.7697	35.4866	24.7813	32.4457	31.398	28.8327	25.2668	35.9401	49.8243	39.2589	50.6752	39.7217	39.9303	25.1818	24.8975	22.6167	17.9109	17.1744	18.2727	10.0351	19.8035	19.0081	23.4654	24.2638	18.4215	20.7682	20.0202	20.5481	23.2386	23.7621	23.1029	25.0383	18.8744	29.1062
435	47.2011	45.8668	45.5109	45.3037	49.8913	46.895	45.1962	45.71	53.0673	51.0198	59.8704	51.3931	51.2476	50.7142	50.8547	44.5907	35.3379	24.648	32.3849	31.2877	28.6966	25.1343	35.7774	49.684	39.0392	50.4928	39.5652	39.8215	25.1067	24.7126	22.449	17.812	17.0156	18.1414	9.9955	19.7021	18.8929	23.3211	24.0272	18.2867	20.6085	19.8936	20.339	23.0207	23.5727	22.9364	24.7704	18.7321	28.897
436	47.0974	45.7269	45.3385	45.1281	49.7671	46.7487	45.037	45.5457	52.9119	50.7677	59.7242	51.1659	51.0732	50.5455	50.6214	44.4115	35.2072	24.5457	32.2347	31.0961	28.5837	25.0511	35.6433	49.575	38.8524	50.3414	39.3212	39.6281	24.964	24.4521	22.2386	17.6298	16.894	17.9617	9.8974	19.5495	18.7677	23.1275	23.8351	18.2275	20.4312	19.7516	20.1513	22.8346	23.3997	22.7239	24.5915	18.5758	28.6685
437	46.8986	45.544	45.1756	44.945	49.5816	46.5804	44.8686	45.3367	52.7809	50.5232	59.5502	50.8875	50.8926	50.3209	50.3785	44.1983	35.0253	24.4035	32.1212	30.8738	28.4941	24.9399	35.515	49.3961	38.6662	50.1673	39.1304	39.4359	24.8114	24.2468	22.0044	17.4547	16.7085	17.7863	9.8002	19.359	18.6806	22.9664	23.7219	18.1448	20.2789	19.6609	19.9469	22.6465	23.1828	22.527	24.4386	18.4408	28.4447
438	46.713	45.351	45.0181	44.7665	49.3745	46.4481	44.7603	45.1602	52.7898	50.3654	59.3136	50.7544	50.7398	50.1032	50.2872	44.0326	34.8803	24.2555	32.0262	30.7111	28.3933	24.8374	35.4728	49.3075	38.4725	49.9846	39.0256	39.2681	24.6578	24.1405	21.9034	17.3309	16.5608	17.6497	9.7163	19.2027	18.6682	22.8778	23.6606	18.0951	20.2365	19.587	19.8392	22.5235	23.0343	22.4246	24.3273	18.3408	28.225
439	46.6017	45.2455	44.9837	44.7007	49.2472	46.3638	44.6131	45.0706	52.7149	50.1764	59.0667	50.544	50.5309	49.9202	50.1048	43.8422	34.7976	24.188	32.0074	30.6656	28.3465	24.7563	35.3796	49.2191	38.2525	49.8402	38.9037	39.1733	24.5108	23.9996	21.7838	17.2664	16.4626	17.5392	9.6466	19.1	18.611	22.7672	23.5133	17.9911	20.1573	19.4531	19.7286	22.3829	22.876	22.2874	24.1957	18.2542	28.0289
440	46.5194	45.2178	44.9683	44.6746	49.2125	46.3267	44.5253	44.9164	52.6171	49.9661	58.8148	50.3881	50.3142	49.7337	49.9286	43.6807	34.7211	24.0793	32.0086	30.5281	28.3022	24.6796	35.2814	49.0498	38.0843	49.6759	38.7517	39.0994	24.3657	23.8691	21.6228	17.1481	16.3695	17.4103	9.5735	19.0015	18.5576	22.6552	23.4	17.91	20.0065	19.3429	19.5208	22.2081	22.7125	22.1324	24.0008	18.1368	27.8596
441	46.4747	45.17	44.908	44.5742	49.2456	46.2339	44.4699	44.7089	52.57	49.872	58.5857	50.2582	50.1913	49.4891	49.7667	43.5731	34.6637	23.978	32.014	30.3825	28.27	24.5987	35.1973	48.9359	37.9411	49.5566	38.6111	39.0084	24.2582	23.6998	21.4988	17.0459	16.2342	17.3203	9.5412	18.9282	18.47	22.5681	23.3188	17.8503	19.9301	19.2966	19.376	22.0802	22.5413	22.0189	23.7861	18.0148	27.6984
442	46.3421	45.03	44.8101	44.4193	49.0894	46.0639	44.3412	44.5345	52.5364	49.7161	58.4258	50.1414	50.0682	49.3112	49.6283	43.417	34.5341	23.8811	31.9268	30.2349	28.157	24.4975	35.0898	48.8473	37.7929	49.4482	38.4908	38.8566	24.1552	23.5834	21.393	16.9121	16.0999	17.2432	9.4545	18.8443	18.3716	22.5085	23.2082	17.7967	19.8133	19.2476	19.2842	21.9289	22.4355	21.8828	23.651	17.8718	27.5244
443	46.196	44.8959	44.6882	44.3004	49.0133	45.979	44.2273	44.4221	52.4718	49.5423	58.2779	50.1061	49.9714	49.1238	49.5735	43.2622	34.4644	23.8304	31.8473	30.1294	28.1089	24.4074	34.9703	48.7662	37.6813	49.3581	38.3744	38.751	24.0801	23.5323	21.2649	16.8574	16.0621	17.1689	9.4191	18.7116	18.3162	22.3629	23.0739	17.6976	19.6658	19.154	19.165	21.7717	22.3157	21.7087	23.5537	17.7693	27.3753
444	46.1179	44.7864	44.5821	44.2404	48.9331	45.8633	44.1025	44.2865	52.3807	49.3651	58.19	50.0256	49.8553	48.931	49.5039	43.0846	34.3888	23.7784	31.75	30.0284	28.0851	24.3496	34.905	48.7293	37.5721	49.2495	38.2537	38.6907	23.9823	23.4464	21.1938	16.7689	16.0418	17.0783	9.3849	18.5908	18.2958	22.2512	22.9769	17.6399	19.563	19.107	19.0661	21.6719	22.2247	21.5593	23.4519	17.709	27.2534
445	46.1231	44.8069	44.5746	44.2877	48.9024	45.837	44.1022	44.2175	52.3427	49.2552	58.1466	49.9208	49.8236	48.8373	49.4046	42.9892	34.442	23.7611	31.7401	30.049	28.118	24.3169	34.9256	48.7649	37.5167	49.2022	38.2417	38.6865	23.9059	23.4232	21.1683	16.7521	16.0434	17.074	9.3741	18.5584	18.2922	22.1849	22.9522	17.6913	19.55	19.0722	18.9986	21.6387	22.1802	21.4993	23.4301	17.6738	27.138
446	46.0842	44.6911	44.5377	44.2345	48.869	45.8224	44.0487	44.1553	52.3915	49.2662	58.1059	49.9165	49.8277	48.7329	49.3131	42.9237	34.4218	23.7167	31.7684	30.0526	28.0179	24.2982	34.9056	48.7279	37.4361	49.1841	38.1828	38.6122	23.8491	23.3283	21.1453	16.7681	16.0072	17.0659	9.3561	18.4546	18.2489	22.1302	22.9413	17.6402	19.5153	19.0439	18.9333	21.6021	22.1337	21.4534	23.3061	17.6039	27.0354
447	45.9676	44.5342	44.402	44.0768	48.6952	45.6783	43.9065	43.9784	52.3462	49.1936	58.023	49.901	49.7926	48.5551	49.2452	42.8561	34.3125	23.5996	31.6984	29.885	27.9422	24.1923	34.8706	48.6557	37.3069	49.1567	38.092	38.5271	23.7738	23.2196	21.0926	16.6644	15.8738	16.9432	9.2796	18.3653	18.193	22.0905	22.871	17.5643	19.4082	19.0066	18.834	21.5113	22.082	21.3605	23.1893	17.5294	26.9652
448	45.8746	44.602	44.2523	43.9258	48.5646	45.5993	43.8441	43.8766	52.2875	49.0371	57.8851	49.825	49.7364	48.3877	49.1402	42.7463	34.2329	23.5257	31.5751	29.8081	28.0171	24.1167	34.7787	48.6027	37.1877	49.049	37.9924	38.4762	23.6975	23.1393	21.051	16.6062	15.7442	16.8435	9.2338	18.3642	18.1366	22.0351	22.7919	17.5238	19.333	18.9514	18.7242	21.3967	22.0499	21.2486	23.0778	17.4388	26.879
449	45.7216	44.4896	44.069	43.7543	48.4712	45.4209	43.8208	43.7883	52.2711	48.866	57.7962	49.7828	49.588	48.2816	49.0172	42.6776	34.1505	23.4061	31.406	29.6609	27.9618	24.085	34.7408	48.578	37.1124	48.9786	37.8907	38.4248	23.6817	23.141	21.067	16.5785	15.6753	16.7858	9.2038	18.2931	18.1301	22.0127	22.7954	17.5542	19.3159	18.964	18.6685	21.39	22.0094	21.199	23.0089	17.4132	26.8137
450	45.6546	44.4024	43.9701	43.6662	48.41	45.2616	43.7188	43.7671	52.2279	48.6581	57.6353	49.6798	49.3741	48.1775	48.8546	42.5101	34.0623	23.3256	31.3781	29.5728	27.939	24.114	34.7191	48.4604	36.9905	48.8488	37.7336	38.2976	23.6324	23.0772	21.0159	16.4918	15.6025	16.6959	9.1337	18.162	18.1306	21.9812	22.783	17.5405	19.2467	18.9762	18.6099	21.3779	21.9592	21.1309	22.8969	17.3938	26.6937
451	45.6391	44.3025	43.9026	43.6455	48.3856	45.1655	43.681	43.698	52.1625	48.5095	57.473	49.5655	49.2794	48.123	48.8096	42.3764	34.0428	23.344	31.4415	29.5131	27.9192	24.1452	34.6913	48.4085	36.8693	48.7936	37.6429	38.2085	23.5939	22.995	20.9346	16.4384	15.5796	16.673	9.0729	18.0995	18.135	21.9707	22.7523	17.547	19.1842	18.9369	18.5379	21.3562	21.9016	21.0618	22.8133	17.3608	26.6429
452	45.618	44.2449	43.8718	43.645	48.3549	45.169	43.7344	43.6865	52.2171	48.5188	57.4861	49.6055	49.307	48.1197	48.8514	42.405	33.9684	23.3462	31.4905	29.4985	27.9327	24.2115	34.7419	48.4368	36.892	48.7925	37.6524	38.2315	23.632	22.9681	20.9776	16.4662	15.5697	16.6576	9.0821	18.1522	18.177	21.9731	22.7724	17.6257	19.1857	19.0126	18.5215	21.3534	21.9457	21.047	22.8472	17.3907	26.6971
453	45.5676	44.1749	43.8416	43.6057	48.3663	45.1054	43.7518	43.65	52.2131	48.5159	57.4874	49.5883	49.2812	48.0524	48.8012	42.3446	33.8973	23.325	31.5395	29.4526	27.9554	24.2575	34.7115	48.4349	36.8673	48.7024	37.6965	38.2242	23.647	22.9558	21.0434	16.4572	15.5855	16.6458	9.0949	18.1867	18.1984	21.9623	22.7808	17.6717	19.1381	19.0585	18.4912	21.363	21.9878	21.0401	22.8524	17.3942	26.694
454	45.4942	44.0198	43.7107	43.5301	48.279	44.9931	43.7143	43.5705	52.0769	48.3218	57.3331	49.4231	49.1291	47.8174	48.6395	42.1217	33.8178	23.3024	31.5149	29.2748	27.9444	24.2269	34.6427	48.3402	36.6823	48.5988	37.6006	38.0747	23.5346	22.8799	21.0163	16.4082	15.5031	16.5339	9.0181	18.1624	18.1697	21.8626	22.7474	17.6309	19.0766	19.069	18.4286	21.3042	21.9921	20.9737	22.7353	17.3252	26.6122
455	45.3491	43.9071	43.6271	43.4545	48.2245	44.931	43.6458	43.5443	51.8993	48.1055	57.1391	49.2907	48.9982	47.5613	48.4141	41.9301	33.7934	23.258	31.5147	29.1485	27.971	24.164	34.6121	48.2126	36.5554	48.4507	37.3979	37.8888	23.3965	22.7793	20.977	16.3901	15.4767	16.4779	9.0012	18.1869	18.1598	21.7961	22.7305	17.5708	19.0262	19.0478	18.3509	21.2427	21.956	20.9223	22.6125	17.2492	26.5251
456	45.2257	43.7643	43.5148	43.3817	48.1798	44.94	43.6017	43.4661	51.8052	47.9367	56.9668	49.1005	48.8389	47.3866	48.2421	41.6908	33.7516	23.247	31.3927	29.0794	27.9698	24.1397	34.5614	48.093	36.4434	48.2982	37.2436	37.7917	23.3037	22.7211	20.8933	16.3507	15.433	16.4738	8.9887	18.2149	18.1318	21.7088	22.6743	17.5163	18.9529	19.0407	18.2533	21.1862	21.9169	20.8518	22.5343	17.2059	26.4771
457	45.1348	43.7551	43.4273	43.3381	48.1677	44.9073	43.5315	43.3921	51.8146	47.8583	56.8849	49.0118	48.7173	47.3248	48.1629	41.5627	33.7535	23.2393	31.3736	29.0113	27.9239	24.1438	34.5307	48.0022	36.3763	48.2029	37.2228	37.7506	23.2499	22.6589	20.8798	16.3145	15.3965	16.4125	8.9552	18.196	18.1345	21.6435	22.6267	17.5471	18.8846	19.0642	18.2122	21.1676	21.9203	20.796	22.4879	17.1844	26.4557
458	45.1145	43.7139	43.4083	43.2868	48.116	44.7977	43.5507	43.3796	51.7637	47.7812	56.8684	49.0069	48.5135	47.2591	48.0414	41.4787	33.7623	23.2515	31.406	28.9261	27.8814	24.1272	34.4978	47.8832	36.3785	48.1064	37.1498	37.6676	23.2875	22.6176	20.8566	16.2806	15.3845	16.3803	8.935	18.1736	18.2185	21.6283	22.6619	17.5772	18.899	19.1387	18.2141	21.2346	21.9703	20.7496	22.4791	17.1617	26.3633
459	45.0673	43.6472	43.4511	43.215	48.0287	44.7141	43.5984	43.3738	51.6638	47.636	56.7174	48.952	48.303	47.1103	47.8673	41.3064	33.6554	23.3071	31.4562	28.8537	27.9221	24.0295	34.4264	47.7095	36.2394	47.9587	36.9824	37.565	23.3032	22.5434	20.8139	16.3302	15.3369	16.3571	8.913	18.109	18.267	21.6189	22.6495	17.5677	18.8647	19.2122	18.1751	21.2493	21.9747	20.7059	22.4178	17.1278	26.2869
460	44.9442	43.5261	43.3881	43.1277	47.9569	44.6431	43.5292	43.3266	51.6123	47.5136	56.5474	48.8373	48.1457	46.984	47.7383	41.1269	33.6143	23.3512	31.4182	28.782	27.8959	23.9785	34.3512	47.5532	36.1083	47.7898	36.8399	37.4887	23.2793	22.457	20.8292	16.3526	15.3074	16.3673	8.8772	18.1145	18.2837	21.5708	22.6075	17.5407	18.7573	19.2153	18.0693	21.1978	21.9925	20.6514	22.3689	17.0656	26.2288
461	44.8638	43.4358	43.3743	43.1151	47.8824	44.5761	43.5306	43.2937	51.613	47.4375	56.4692	48.814	48.0516	46.9174	47.6971	41.0409	33.5622	23.3566	31.397	28.7292	27.8892	23.9661	34.3066	47.4695	35.9938	47.677	36.8129	37.4421	23.243	22.413	20.8397	16.3032	15.272	16.3273	8.8647	18.1033	18.2925	21.5694	22.6084	17.559	18.7149	19.2488	18.0367	21.1619	21.9913	20.6347	22.3281	17.0799	26.1931
462	44.7305	43.3834	43.2543	43.1253	47.7646	44.4644	43.5839	43.2308	51.5712	47.3127	56.3222	48.7443	47.9341	46.8464	47.571	40.8666	33.5511	23.3181	31.4241	28.7198	27.887	23.9671	34.26	47.3795	35.8893	47.591	36.7234	37.4074	23.2013	22.352	20.8509	16.2338	15.227	16.312	8.8506	18.1127	18.3395	21.5658	22.6077	17.5998	18.7065	19.3082	18.0283	21.1766	22.0214	20.6214	22.2987	17.0683	26.179
463	44.7228	43.333	43.1755	43.161	47.7357	44.4486	43.6529	43.22	51.5909	47.2683	56.1974	48.6857	47.8837	46.8032	47.4621	40.7385	33.5357	23.3491	31.4616	28.6869	27.9034	23.993	34.2732	47.3357	35.9009	47.5405	36.6645	37.421	23.2333	22.3195	20.8527	16.247	15.2252	16.2738	8.8687	18.1552	18.4343	21.5674	22.612	17.6442	18.7408	19.4105	18.0729	21.2151	22.0704	20.6314	22.2806	17.1052	26.1553
464	44.6843	43.2858	43.1775	43.1846	47.7364	44.4141	43.6938	43.2138	51.6742	47.3918	56.2071	48.763	47.9074	46.7848	47.5001	40.744	33.5791	23.3964	31.4863	28.6371	27.91	24.0638	34.3423	47.3481	36.0087	47.5643	36.6762	37.4667	23.2963	22.3667	20.92	16.2737	15.2635	16.325	8.8958	18.2513	18.5744	21.5895	22.6887	17.6861	18.7569	19.5443	18.1063	21.2922	22.147	20.7027	22.326	17.1489	26.1855
465	44.6208	43.2405	43.1864	43.2132	47.7325	44.3677	43.7134	43.2802	51.6617	47.4285	56.2013	48.7766	47.8821	46.7932	47.4964	40.7149	33.6074	23.4602	31.546	28.6468	27.9128	24.0473	34.3666	47.3043	36.0358	47.5477	36.6923	37.5049	23.3084	22.4008	20.971	16.2902	15.2975	16.3971	8.8885	18.3349	18.6649	21.5977	22.7009	17.7108	18.7608	19.613	18.1434	21.3351	22.2047	20.7485	22.3456	17.1542	26.1586
466	44.5462	43.2173	43.1458	43.1355	47.7076	44.2642	43.6843	43.2548	51.5853	47.3785	56.0832	48.6226	47.7895	46.7027	47.3428	40.5609	33.5962	23.4754	31.5564	28.5898	27.9366	23.9618	34.2889	47.209	35.9359	47.3754	36.5999	37.4548	23.2673	22.3544	20.9084	16.265	15.2466	16.3652	8.8321	18.3672	18.6914	21.57	22.6845	17.7298	18.7058	19.6656	18.1263	21.3036	22.2454	20.7372	22.2954	17.1237	26.0511
467	44.5717	43.1971	43.0936	43.1219	47.6861	44.2583	43.7542	43.2487	51.5694	47.3241	55.9812	48.5549	47.7345	46.5775	47.2502	40.4145	33.5452	23.4773	31.5497	28.5307	27.9593	23.9179	34.2773	47.1514	35.8605	47.2781	36.5014	37.388	23.2444	22.334	20.8756	16.2915	15.2041	16.3622	8.8108	18.4306	18.7556	21.5542	22.6815	17.7407	18.6266	19.717	18.1162	21.2988	22.285	20.7701	22.2516	17.1313	25.9888
468	44.5011	43.1157	42.9971	43.131	47.668	44.2995	43.7466	43.1936	51.6719	47.3944	56.035	48.6206	47.7409	46.5692	47.3287	40.4883	33.5003	23.4305	31.4403	28.5087	27.9915	23.9569	34.381	47.2074	35.907	47.3441	36.5068	37.4233	23.2607	22.3803	20.9311	16.3269	15.1723	16.3522	8.8183	18.4964	18.8408	21.5645	22.7432	17.774	18.6431	19.8488	18.1565	21.3281	22.3719	20.8355	22.2765	17.1737	26.0348
469	44.362	42.9782	42.8815	43.1101	47.6338	44.2316	43.6548	43.1506	51.8141	47.5726	56.1182	48.7681	47.8541	46.6639	47.4553	40.5988	33.4442	23.3688	31.4019	28.4551	28.0402	24.022	34.514	47.2994	36.04	47.4533	36.5742	37.5014	23.3597	22.4712	21.0131	16.3089	15.1193	16.3456	8.8199	18.5634	18.893	21.6019	22.8143	17.7805	18.6719	19.9539	18.1981	21.3803	22.4385	20.9055	22.3322	17.2219	26.099
470	44.2441	42.8673	42.8154	43.0392	47.6114	44.1768	43.6694	43.1108	51.7542	47.5894	56.1761	48.8418	47.9038	46.7639	47.4678	40.6326	33.3967	23.3296	31.4521	28.3861	28.066	24.0676	34.5997	47.3233	36.0751	47.471	36.6235	37.5128	23.4321	22.5555	21.0521	16.263	15.0877	16.3469	8.8009	18.6059	18.9438	21.6018	22.864	17.7864	18.6774	20.0106	18.2254	21.4374	22.4774	20.9672	22.3376	17.2375	26.123
471	44.2291	42.8322	42.7697	43.0224	47.6351	44.1432	43.7531	43.0827	51.6972	47.4844	56.053	48.7797	47.8322	46.715	47.389	40.507	33.3533	23.3151	31.4877	28.3356	28.0793	24.0536	34.619	47.2789	35.9829	47.3719	36.5586	37.5055	23.4121	22.546	21.017	16.2141	15.0432	16.33	8.7614	18.5971	18.977	21.5936	22.9016	17.7904	18.6741	20.0146	18.2393	21.454	22.4394	20.9537	22.3143	17.216	26.0719
472	44.1455	42.736	42.689	42.9496	47.5836	44.0669	43.7292	42.9867	51.5967	47.3894	55.8424	48.668	47.7469	46.5905	47.2743	40.3544	33.2493	23.2496	31.4252	28.2526	28.0706	24.0359	34.5958	47.1942	35.8788	47.2711	36.4533	37.4553	23.3737	22.495	21.0105	16.1551	14.9966	16.2946	8.7245	18.5683	19.0146	21.6281	22.908	17.7933	18.6717	20.0275	18.2235	21.4507	22.4422	20.918	22.3215	17.242	25.997
473	44.1209	42.6465	42.6483	42.976	47.5531	44.0391	43.6526	42.9223	51.5263	47.3449	55.8564	48.6658	47.6883	46.5935	47.2374	40.3417	33.1854	23.2412	31.4467	28.1983	28.0569	24.0632	34.6062	47.1575	35.9211	47.2805	36.4216	37.4325	23.3623	22.5103	21.0766	16.1186	14.9661	16.3089	8.7159	18.6421	19.0867	21.6774	22.9158	17.8441	18.6765	20.094	18.1976	21.4945	22.5153	20.9332	22.3556	17.2524	25.9923
474	44.0806	42.594	42.6042	42.9943	47.5925	44.0361	43.5911	42.9467	51.5588	47.3843	55.9121	48.7356	47.7027	46.6187	47.2881	40.3854	33.1569	23.2529	31.5215	28.1658	28.0338	24.1133	34.6443	47.2173	35.9751	47.3498	36.463	37.5044	23.3913	22.563	21.1264	16.1108	14.9696	16.3177	8.72	18.7112	19.1553	21.724	22.9212	17.8626	18.6801	20.1635	18.2134	21.533	22.5772	20.976	22.372	17.2523	25.988
475	44.0594	42.5372	42.5493	42.9562	47.6023	43.9975	43.5534	42.9278	51.5488	47.4398	55.8939	48.7291	47.6835	46.5721	47.2989	40.3545	33.1618	23.22	31.5278	28.1398	28.0031	24.1156	34.6197	47.2544	35.9528	47.3738	36.4317	37.5265	23.3851	22.5813	21.125	16.1086	14.96	16.336	8.7326	18.7667	19.1602	21.724	22.8863	17.789	18.6734	20.1785	18.1964	21.5153	22.5627	20.9942	22.3626	17.237	25.9611
476	44.0244	42.4681	42.4886	42.9127	47.5061	43.9489	43.4772	42.8691	51.4581	47.3948	55.7687	48.6855	47.6859	46.5041	47.2532	40.2641	33.1031	23.1149	31.5251	28.096	27.9397	24.1111	34.6357	47.2278	35.9188	47.3413	36.3414	37.452	23.3581	22.5644	21.0977	16.1076	14.892	16.3089	8.7124	18.7823	19.1627	21.6814	22.8196	17.7286	18.641	20.1683	18.1749	21.4624	22.5454	20.9623	22.3156	17.2584	25.9223
477	43.9828	42.3732	42.3706	42.8224	47.439	43.8708	43.3938	42.7881	51.3827	47.3363	55.6624	48.6227	47.6553	46.4123	47.1648	40.2038	33.0165	23.0145	31.4803	28.0565	27.8729	24.0846	34.5824	47.1698	35.8889	47.2368	36.3105	37.3836	23.3448	22.5216	21.0634	16.0629	14.8579	16.2681	8.6921	18.8169	19.1735	21.6355	22.7562	17.7238	18.6242	20.1623	18.1425	21.4298	22.5075	20.9405	22.3034	17.2646	25.8479
478	43.8611	42.2662	42.3005	42.6742	47.3721	43.8212	43.3076	42.7185	51.3492	47.2288	55.4994	48.528	47.5321	46.2546	47.0766	40.1283	32.9067	22.9538	31.4697	28.0476	27.8	24.0583	34.466	47.0671	35.7879	47.1139	36.2561	37.3271	23.2875	22.4971	20.9715	16.0146	14.8526	16.2613	8.6618	18.836	19.1719	21.6186	22.7245	17.7245	18.5933	20.1882	18.1071	21.3919	22.4764	20.9003	22.288	17.2252	25.7518
479	43.7458	42.1696	42.2534	42.6147	47.2733	43.7365	43.1801	42.6284	51.2297	47.0343	55.1927	48.3365	47.2809	45.9877	46.8452	39.9003	32.7697	22.8974	31.4186	28.0076	27.692	23.9481	34.2959	46.8308	35.6327	46.8761	36.0962	37.1377	23.0916	22.3869	20.8715	15.969	14.8092	16.2003	8.6125	18.8287	19.1746	21.5902	22.619	17.6528	18.5229	20.1024	18.0425	21.2761	22.3806	20.8094	22.1477	17.1201	25.5831
480	43.6912	42.0701	42.1768	42.5745	47.1596	43.6447	43.0338	42.5344	51.088	46.8055	54.8619	48.0895	47.076	45.7512	46.5973	39.6872	32.625	22.8082	31.374	27.9118	27.5657	23.8064	34.0995	46.6088	35.4842	46.6973	35.9114	36.9518	22.8942	22.2518	20.7694	15.943	14.6915	16.138	8.5637	18.7857	19.1542	21.5729	22.5243	17.5573	18.4708	19.9998	17.9624	21.1128	22.2809	20.7359	22.0278	17.0486	25.4364
481	43.5996	41.9702	42.102	42.5248	47.0889	43.5436	42.943	42.5054	51.0201	46.6864	54.7208	48.0037	47.008	45.6321	46.479	39.5692	32.5431	22.6948	31.3812	27.8433	27.49	23.7437	34.0353	46.5847	35.4032	46.6641	35.8269	36.8902	22.8271	22.1405	20.6639	15.9298	14.6491	16.0805	8.5209	18.7699	19.1706	21.544	22.4884	17.5192	18.4317	19.9642	17.8872	21.026	22.2062	20.6741	21.9712	17.0043	25.3789
482	43.5095	41.8882	42.0787	42.4404	47.0286	43.4653	42.8797	42.4446	51.0343	46.6436	54.7064	48.0029	46.9881	45.5828	46.4484	39.5068	32.4229	22.5916	31.4104	27.7925	27.4389	23.7805	34.0586	46.5834	35.3532	46.6347	35.8324	36.9292	22.836	22.0971	20.6242	15.924	14.6505	16.0527	8.5273	18.768	19.1971	21.5182	22.45	17.526	18.4087	19.9341	17.8491	21.0143	22.1765	20.6878	21.9478	16.978	25.3521
483	43.4116	41.7555	41.9581	42.3957	46.9385	43.3726	42.7578	42.3027	50.9932	46.5812	54.6372	47.9931	46.9214	45.5016	46.391	39.3849	32.3626	22.4829	31.3853	27.6679	27.3347	23.7485	34.037	46.5503	35.3038	46.5362	35.7344	36.8714	22.822	22.0697	20.5638	15.8695	14.6138	16.0177	8.5102	18.7596	19.1709	21.4334	22.4002	17.4738	18.3322	19.8434	17.8153	20.9436	22.1232	20.6564	21.9313	16.9627	25.2748
484	43.3227	41.6777	41.7962	42.398	46.8192	43.2975	42.6975	42.1895	50.9182	46.4492	54.5792	47.949	46.8318	45.4169	46.3302	39.3248	32.2725	22.4313	31.2701	27.5664	27.2749	23.642	33.9822	46.5111	35.2619	46.4948	35.5835	36.7745	22.74	22.0006	20.4716	15.7923	14.5234	15.9532	8.4742	18.7648	19.1228	21.3449	22.299	17.3706	18.2275	19.7425	17.7259	20.8544	22.051	20.5384	21.8857	16.9456	25.1952
485	43.2646	41.6634	41.7552	42.3974	46.7585	43.2945	42.6861	42.1596	50.9041	46.3287	54.4923	47.8632	46.7349	45.3222	46.2514	39.2743	32.1826	22.3692	31.1598	27.4761	27.2422	23.5777	33.9611	46.4425	35.2181	46.4587	35.4916	36.7068	22.6434	21.918	20.4125	15.7483	14.4518	15.8885	8.4601	18.7998	19.1027	21.3083	22.2319	17.3198	18.1599	19.6642	17.6481	20.7592	21.9891	20.4015	21.8173	16.8898	25.0893
486	43.2516	41.7001	41.7051	42.3914	46.7965	43.2986	42.6739	42.1779	50.8725	46.2718	54.4461	47.7606	46.6559	45.2031	46.1596	39.1874	32.1288	22.3282	31.0924	27.4201	27.2019	23.5533	33.965	46.3682	35.1923	46.383	35.4724	36.6879	22.5834	21.8542	20.3768	15.7508	14.4557	15.8892	8.4779	18.8329	19.0945	21.2974	22.1622	17.2927	18.103	19.6178	17.5952	20.7117	21.9686	20.3763	21.7779	16.8607	25.0207
487	43.2342	41.6265	41.6456	42.3547	46.7823	43.2338	42.5638	42.1223	50.8502	46.2041	54.406	47.6957	46.5965	45.1747	46.1028	39.1279	32.0733	22.2579	30.966	27.346	27.1288	23.5582	34.0082	46.29	35.1566	46.382	35.4574	36.6668	22.5388	21.8334	20.3285	15.7743	14.4427	15.8982	8.4682	18.8671	19.1201	21.3079	22.1448	17.2779	18.114	19.582	17.585	20.6537	21.9719	20.3927	21.7606	16.8848	24.9864
488	43.1511	41.5154	41.5767	42.231	46.7149	43.1265	42.4841	41.9909	50.7864	46.093	54.3145	47.671	46.5626	45.1305	46.0273	39.0978	31.9884	22.2022	30.8714	27.2959	27.0414	23.5315	34.0399	46.2456	35.1181	46.3792	35.4072	36.6174	22.4971	21.813	20.2714	15.7191	14.4152	15.8384	8.4598	18.8838	19.1387	21.2697	22.0914	17.2399	18.088	19.5186	17.5593	20.6054	21.9526	20.3641	21.734	16.8697	24.984
489	43.0081	41.3739	41.4696	42.0841	46.5633	42.9971	42.3565	41.8574	50.5783	45.945	54.0878	47.5551	46.4604	45.0059	45.9575	38.9453	31.8929	22.1059	30.7652	27.2005	27.0168	23.4029	34.0172	46.1049	35.0287	46.2933	35.3021	36.5074	22.4377	21.7377	20.1775	15.642	14.3651	15.7721	8.4357	18.8708	19.0935	21.1682	22.0418	17.1774	18.0422	19.3988	17.4571	20.5376	21.8733	20.3277	21.6564	16.8044	24.934
490	42.8314	41.2254	41.3103	41.9168	46.2821	42.8456	42.2385	41.6762	50.29	45.6637	53.7515	47.2951	46.2111	44.7145	45.7269	38.6807	31.7503	21.9864	30.677	27.0632	26.9297	23.2464	33.8551	45.782	34.8156	46.0201	35.056	36.293	22.3349	21.6019	19.9772	15.5352	14.3056	15.6565	8.3916	18.7645	19.045	21.0632	21.9582	17.1004	17.9317	19.2305	17.2973	20.4253	21.7264	20.2303	21.4775	16.6826	24.8025
491	42.6589	41.0247	41.1642	41.8077	46.0729	42.6865	42.0869	41.4733	49.9937	45.3302	53.4798	47.0355	45.9302	44.4439	45.4086	38.4597	31.6042	21.8493	30.5736	26.9327	26.7792	23.0835	33.6994	45.5106	34.6402	45.7052	34.8244	36.0582	22.1821	21.4476	19.8093	15.4122	14.2096	15.5678	8.3281	18.692	19.0067	20.9916	21.8859	17.0385	17.8587	19.1232	17.1695	20.3054	21.5983	20.1238	21.3265	16.5659	24.6142
492	42.4914	40.8592	41.0629	41.6903	45.9748	42.5382	41.9278	41.3426	49.863	45.1643	53.3745	46.9157	45.7194	44.3053	45.1967	38.3343	31.4438	21.7207	30.4717	26.8575	26.6559	22.9842	33.6702	45.4134	34.5407	45.4946	34.7453	35.9091	22.0843	21.3421	19.7237	15.2979	14.0984	15.4553	8.2586	18.5915	19.0044	20.9769	21.8602	16.9853	17.8183	19.0527	17.1341	20.2296	21.5501	20.0389	21.2488	16.5299	24.5054
493	42.4425	40.8035	41.0388	41.6077	45.9063	42.482	41.8306	41.2942	49.9436	45.145	53.3507	46.9146	45.6452	44.2512	45.1351	38.298	31.3922	21.6746	30.3744	26.8044	26.6317	22.8799	33.7492	45.3667	34.5033	45.4377	34.7199	35.9251	22.0506	21.2671	19.6444	15.253	14.0563	15.3949	8.2453	18.577	19.0024	20.9421	21.8426	16.9376	17.8168	18.9781	17.0934	20.1753	21.5068	20.0084	21.1996	16.4954	24.4475
494	42.4188	40.796	41.0116	41.5584	45.8067	42.4823	41.7968	41.2571	50.0007	45.1039	53.3144	46.9138	45.6564	44.1987	45.1346	38.2637	31.3218	21.6426	30.372	26.7824	26.6416	22.7885	33.7852	45.3411	34.4392	45.4191	34.7021	35.9674	22.0484	21.2334	19.5808	15.2299	14.0635	15.3953	8.2611	18.6351	18.9542	20.8644	21.8366	16.9294	17.7583	18.9189	17.0257	20.0956	21.4686	19.9735	21.1502	16.4338	24.3832
495	42.3459	40.7121	40.8884	41.5114	45.6622	42.3903	41.6803	41.1217	49.9938	44.9914	53.2215	46.8869	45.5944	44.0642	45.0527	38.2282	31.1693	21.5993	30.2817	26.6696	26.5985	22.6979	33.7235	45.2904	34.3603	45.3565	34.6766	35.9318	21.9846	21.2145	19.496	15.1505	14.0201	15.3526	8.2304	18.6237	18.9532	20.814	21.7885	16.9161	17.725	18.8475	16.9653	20.0152	21.3784	19.9488	21.0788	16.3691	24.3067
496	42.2505	40.602	40.7758	41.4225	45.5427	42.2554	41.5217	40.9332	49.9538	44.9358	53.101	46.8111	45.4606	43.9056	44.931	38.1322	31.06	21.5279	30.1465	26.61	26.5056	22.6189	33.6095	45.2115	34.3424	45.2634	34.6046	35.9101	21.8951	21.2037	19.4032	15.0825	13.9797	15.2668	8.2055	18.583	18.9498	20.7684	21.7528	16.9108	17.6983	18.7371	16.9709	19.9435	21.2899	19.9217	20.9995	16.337	24.2776
497	42.21	40.5675	40.7257	41.3305	45.4684	42.1833	41.3901	40.8163	49.8526	44.8623	52.9847	46.7339	45.3854	43.7056	44.8406	38.0565	30.9962	21.453	30.1173	26.5609	26.434	22.5264	33.5561	45.0829	34.2816	45.2232	34.5425	35.8833	21.8054	21.1596	19.2979	15.0378	13.97	15.2052	8.2096	18.5431	18.9052	20.6495	21.6959	16.8605	17.639	18.6439	16.9246	19.8479	21.2468	19.864	20.9149	16.2843	24.232
498	42.237	40.517	40.7013	41.2776	45.4212	42.1288	41.3089	40.7585	49.8102	44.8231	52.8911	46.7283	45.3366	43.5545	44.7613	37.9587	31.0006	21.4018	30.1278	26.4904	26.373	22.4429	33.4698	45.0243	34.196	45.1684	34.4825	35.8272	21.755	21.101	19.1854	14.982	13.975	15.1514	8.2097	18.5302	18.896	20.5503	21.6379	16.7812	17.6001	18.5482	16.872	19.737	21.1526	19.8241	20.8053	16.1865	24.156
499	42.1963	40.4332	40.6459	41.2003	45.3503	42.032	41.1878	40.6496	49.7858	44.76	52.8499	46.646	45.231	43.4426	44.6454	37.8857	30.9277	21.3152	30.1162	26.4207	26.2708	22.3517	33.3851	44.9159	34.0773	45.0268	34.3998	35.7893	21.6955	21.0415	19.091	14.8912	13.9193	15.0681	8.1813	18.4566	18.8683	20.4711	21.5971	16.7069	17.5923	18.4766	16.8194	19.6561	21.0425	19.7642	20.7167	16.1027	24.0329
500	42.182	40.4054	40.6163	41.1987	45.2957	41.9321	41.0944	40.591	49.7753	44.6751	52.7941	46.5523	45.1496	43.358	44.5254	37.8459	30.8555	21.25	30.0884	26.3711	26.1664	22.268	33.2752	44.8229	33.9597	44.955	34.3468	35.7411	21.6431	20.9794	19.024	14.81	13.8906	14.9987	8.1571	18.3823	18.8572	20.4234	21.5664	16.6758	17.5773	18.43	16.8044	19.6171	21.0014	19.7292	20.6672	16.0446	23.9372
501	42.0487	40.2593	40.4592	41.1024	45.131	41.7905	40.9168	40.4146	49.7993	44.4647	52.6649	46.4334	45.0506	43.2947	44.414	37.7584	30.6878	21.1404	29.9991	26.2778	26.0177	22.1704	33.1998	44.712	33.8513	44.8607	34.213	35.7006	21.5689	20.9172	18.9295	14.7233	13.8284	14.8933	8.1315	18.2845	18.8556	20.3855	21.5099	16.6285	17.5347	18.3701	16.756	19.541	20.8996	19.6601	20.5689	16.0188	23.8968
502	41.9662	40.1455	40.3892	41.0229	44.9876	41.6376	40.8043	40.2758	49.7629	44.2327	52.4777	46.2836	44.9648	43.2047	44.3003	37.602	30.5791	21.0578	29.922	26.1773	25.8689	22.077	33.097	44.6091	33.7391	44.7716	34.0709	35.5726	21.4734	20.8409	18.8004	14.6847	13.7684	14.8214	8.1044	18.2037	18.8467	20.3098	21.4062	16.5758	17.5103	18.2796	16.6771	19.4168	20.8025	19.5982	20.4853	15.9618	23.8302
503	41.887	40.0205	40.3472	40.9218	44.8885	41.4432	40.7068	40.1475	49.6461	44.074	52.3041	46.1142	44.8692	43.1109	44.2056	37.4823	30.4613	20.9586	29.8286	26.0849	25.7828	21.9749	32.9918	44.4616	33.6263	44.6619	33.9213	35.4325	21.3209	20.7538	18.6089	14.6527	13.6594	14.7743	8.0665	18.0984	18.773	20.1644	21.3287	16.4963	17.4532	18.1885	16.5609	19.2886	20.7035	19.5255	20.4082	15.8761	23.6856
504	41.7819	39.9634	40.2902	40.8883	44.8204	41.2895	40.5946	40.0461	49.56	43.9571	52.0815	45.9422	44.7199	42.9923	44.1173	37.3589	30.3505	20.88	29.7443	25.9795	25.7069	21.8772	32.9081	44.3745	33.5089	44.6275	33.7498	35.2999	21.1353	20.6525	18.4475	14.5984	13.6175	14.6952	8.0215	18.0352	18.7189	20.0156	21.2491	16.4167	17.3719	18.1021	16.4495	19.16	20.585	19.4382	20.3124	15.7686	23.5538
505	41.699	39.8952	40.2103	40.7886	44.7193	41.1797	40.4884	39.9481	49.4978	43.8854	51.9276	45.8167	44.6362	42.9213	43.9888	37.2765	30.2468	20.7992	29.6987	25.9285	25.6415	21.8065	32.847	44.298	33.4649	44.6078	33.6018	35.2715	21.0423	20.5964	18.3151	14.4982	13.5549	14.5711	7.9808	17.9646	18.6673	19.8958	21.2207	16.3954	17.3202	17.989	16.3944	19.0672	20.5002	19.383	20.238	15.6924	23.5268
506	41.63	39.8464	40.1044	40.7075	44.6073	41.0917	40.3774	39.7917	49.3775	43.7678	51.7966	45.685	44.5675	42.8894	43.9353	37.1998	30.1411	20.7533	29.629	25.8459	25.5311	21.7302	32.8174	44.2022	33.3751	44.6058	33.4659	35.2608	20.9969	20.5534	18.2274	14.4074	13.521	14.4735	7.9759	17.8853	18.6492	19.7838	21.1401	16.3716	17.2924	17.8697	16.3476	19.007	20.4327	19.3269	20.1987	15.6357	23.442
507	41.6332	39.8668	40.0605	40.7079	44.5943	41.0732	40.3198	39.7003	49.2695	43.6881	51.6713	45.5379	44.4639	42.8496	43.8768	37.0757	30.0321	20.7471	29.584	25.7627	25.4728	21.6244	32.7539	44.0924	33.2662	44.5549	33.3735	35.1962	20.9367	20.4737	18.115	14.3657	13.493	14.4079	7.9512	17.84	18.6005	19.6766	21.0538	16.2833	17.2464	17.7926	16.2404	18.9633	20.3158	19.252	20.1213	15.5992	23.3488
508	41.5808	39.8376	39.9763	40.6793	44.586	41.0142	40.2352	39.6448	49.2045	43.671	51.6113	45.3957	44.4105	42.799	43.7853	37.0355	29.9255	20.7056	29.4789	25.6516	25.4036	21.5857	32.7294	44.0708	33.1839	44.5568	33.3083	35.1531	20.8709	20.4201	18.0388	14.3375	13.4516	14.337	7.9263	17.7854	18.5974	19.5999	21.005	16.2354	17.2153	17.7522	16.2156	18.9201	20.2596	19.1781	20.0434	15.5695	23.3245
509	41.5731	39.7973	39.9376	40.6977	44.5984	40.9736	40.1473	39.6278	49.1859	43.6339	51.5146	45.2749	44.3356	42.7381	43.7431	36.9927	29.9097	20.6657	29.453	25.6226	25.3942	21.5393	32.6899	44.0208	33.1609	44.5477	33.2652	35.1291	20.7762	20.357	18.0004	14.2992	13.3916	14.2729	7.8988	17.7087	18.6399	19.5173	20.9592	16.2333	17.2034	17.7136	16.2116	18.8884	20.1936	19.1353	19.9815	15.51	23.2751
510	41.5943	39.7889	39.9105	40.6997	44.5788	40.9859	40.0866	39.6228	49.1493	43.5939	51.4842	45.2249	44.2657	42.7145	43.7199	36.9693	29.9112	20.6134	29.4435	25.6025	25.3351	21.5171	32.6605	43.9851	33.1345	44.5096	33.266	35.113	20.6674	20.3476	17.9231	14.2766	13.4062	14.194	7.8959	17.6677	18.6578	19.4436	20.8973	16.2319	17.2022	17.6914	16.183	18.8001	20.1164	19.0843	19.9582	15.4248	23.2099
511	41.5508	39.7641	39.8517	40.643	44.504	40.9494	39.9955	39.6079	49.1288	43.5517	51.547	45.2119	44.2307	42.6818	43.6954	36.9655	29.8959	20.5559	29.4091	25.5542	25.2492	21.491	32.6627	43.9283	33.0511	44.4948	33.2687	35.1336	20.5994	20.3336	17.8597	14.2436	13.4001	14.1676	7.9007	17.6527	18.626	19.3837	20.8668	16.2007	17.182	17.6588	16.1579	18.7563	20.0601	19.0324	19.9106	15.3441	23.1303
512	41.4904	39.7362	39.8243	40.6418	44.4661	40.9164	39.9739	39.5868	49.1186	43.5232	51.5687	45.2088	44.1954	42.6709	43.652	36.956	29.8659	20.5364	29.3603	25.5107	25.1916	21.4677	32.6576	43.9187	32.969	44.4803	33.2759	35.1384	20.5646	20.3121	17.833	14.2218	13.4198	14.175	7.9036	17.6591	18.6235	19.3366	20.8681	16.1751	17.1553	17.6194	16.147	18.7376	20.0088	19.002	19.8627	15.3091	23.0952
513	41.3681	39.6711	39.7553	40.5715	44.4187	40.8562	39.8894	39.5218	48.922	43.3785	51.4397	45.0531	44.0677	42.5347	43.5179	36.8124	29.8062	20.5159	29.2998	25.4334	25.1169	21.3592	32.5435	43.7475	32.8344	44.382	33.1481	34.9903	20.4629	20.2072	17.7217	14.172	13.4375	14.1485	7.8841	17.6313	18.5614	19.247	20.7978	16.1388	17.1029	17.5345	16.0516	18.6422	19.9001	18.8994	19.7836	15.2487	23.0253
514	41.2962	39.6357	39.6886	40.4828	44.3413	40.7606	39.798	39.4429	48.7855	43.3034	51.3915	44.9656	44.0242	42.4932	43.4693	36.7523	29.7112	20.4819	29.1962	25.3644	25.0187	21.2825	32.5352	43.7145	32.8278	44.3272	33.1182	34.9231	20.3917	20.1339	17.6625	14.1166	13.3873	14.0708	7.8537	17.5432	18.5769	19.209	20.8004	16.1491	17.0481	17.5096	15.9781	18.5544	19.8221	18.844	19.7606	15.1944	22.9775
515	41.2559	39.5401	39.6414	40.3639	44.2261	40.6955	39.7443	39.4044	48.7238	43.2793	51.3958	44.8856	44.0244	42.4446	43.4734	36.7161	29.6844	20.4356	29.0404	25.3354	24.9367	21.2323	32.5593	43.7967	32.8743	44.3185	33.0924	34.9353	20.3334	20.1092	17.6485	14.0925	13.3359	14.0402	7.8701	17.4768	18.5797	19.1228	20.7897	16.1624	17.0159	17.4581	15.9335	18.508	19.7591	18.8181	19.7349	15.1481	22.9568
516	41.1842	39.409	39.5461	40.2493	44.1297	40.6326	39.7072	39.3438	48.7054	43.3114	51.4147	44.8616	44.0877	42.4469	43.488	36.7363	29.6079	20.3402	28.8852	25.2719	24.849	21.2101	32.6086	43.8735	32.8859	44.2791	33.0979	34.9911	20.344	20.111	17.6422	14.0836	13.313	13.9826	7.857	17.45	18.5565	19.0812	20.749	16.1635	17.009	17.4207	15.9578	18.5136	19.7576	18.8228	19.7307	15.1096	22.9421
517	41.0496	39.2559	39.4152	40.1366	43.977	40.5239	39.6509	39.2102	48.5935	43.2233	51.303	44.7591	44.0586	42.3981	43.4604	36.7081	29.503	20.1997	28.7765	25.1267	24.7522	21.1614	32.5801	43.815	32.8097	44.1824	33.0851	34.9308	20.3111	20.0875	17.6221	14.0361	13.26	13.9102	7.8341	17.4097	18.5285	19.0655	20.6733	16.1572	16.9895	17.3856	15.9311	18.4972	19.7522	18.7618	19.6606	15.0625	22.8837
518	40.9696	39.1652	39.3307	40.0342	43.8679	40.4862	39.6323	39.1195	48.3855	43.079	51.0773	44.6142	43.9295	42.2586	43.3324	36.609	29.4382	20.1187	28.6897	25.0333	24.7209	21.0681	32.5016	43.6546	32.6802	44.0245	32.9965	34.8028	20.2348	20.0163	17.5579	13.9905	13.2013	13.8567	7.8113	17.3905	18.5099	18.9902	20.5757	16.1332	16.9239	17.3277	15.8608	18.4522	19.7168	18.6244	19.5744	14.9934	22.8203
519	40.8623	39.0205	39.1772	39.8692	43.7284	40.4245	39.5493	39.0043	48.1678	42.8755	50.8888	44.4331	43.7749	42.0848	43.1554	36.4465	29.3565	20.0349	28.581	24.9285	24.6011	20.9566	32.3944	43.5046	32.5548	43.8775	32.8738	34.6275	20.1397	19.9355	17.4722	13.9183	13.1043	13.7637	7.7638	17.3091	18.4662	18.8773	20.4673	16.0698	16.84	17.2305	15.7652	18.3385	19.6112	18.497	19.4922	14.9011	22.7034
520	40.7569	38.8869	39.0955	39.7675	43.638	40.3617	39.4261	38.9451	48.0642	42.775	50.857	44.3696	43.6599	41.9629	43.0459	36.3793	29.2689	19.9426	28.4463	24.7936	24.471	20.8665	32.3029	43.4318	32.515	43.8169	32.8367	34.503	20.0431	19.8834	17.4343	13.8398	13.0431	13.6925	7.7146	17.2482	18.4607	18.7935	20.4193	16.0414	16.756	17.1755	15.7109	18.2438	19.527	18.4241	19.4456	14.8303	22.6162
521	40.5965	38.8166	39.0399	39.6763	43.5936	40.2525	39.3065	38.9217	48.0464	42.7131	50.9043	44.3445	43.6211	41.9176	43.025	36.4051	29.1833	19.8997	28.3339	24.683	24.4037	20.8104	32.2524	43.3969	32.5158	43.7601	32.826	34.4465	19.9947	19.8362	17.4181	13.7972	13.0069	13.636	7.691	17.2045	18.4398	18.7586	20.3941	16.0477	16.6864	17.1531	15.6864	18.2145	19.4734	18.3714	19.3906	14.8106	22.5825
522	40.4554	38.7602	38.9535	39.6298	43.571	40.1437	39.237	38.8637	48.0747	42.669	50.9064	44.335	43.6239	41.8918	43.0677	36.3997	29.1353	19.8489	28.2375	24.6101	24.3897	20.7811	32.2103	43.3513	32.5047	43.7043	32.8282	34.4316	20.005	19.8123	17.4344	13.7705	12.9779	13.6148	7.6755	17.1682	18.425	18.7398	20.3489	16.0759	16.6604	17.1442	15.6719	18.1982	19.4438	18.3221	19.3315	14.8034	22.5842
523	40.3497	38.6662	38.8411	39.5397	43.4921	40.0429	39.1565	38.7713	48.0329	42.6351	50.8635	44.2777	43.5892	41.7891	43.0002	36.368	29.0592	19.7788	28.183	24.5493	24.3444	20.7469	32.1782	43.2976	32.4288	43.6391	32.8018	34.3868	20.02	19.8065	17.4081	13.7278	12.9138	13.5664	7.6563	17.1266	18.4299	18.7265	20.3155	16.0751	16.6438	17.1573	15.6525	18.1858	19.4232	18.2623	19.2813	14.7524	22.5474
524	40.2628	38.5979	38.8081	39.4434	43.4075	39.9394	39.0758	38.679	47.9198	42.5091	50.6709	44.1356	43.4991	41.6056	42.8696	36.2507	29.0077	19.7174	28.1453	24.4445	24.2782	20.6743	32.0572	43.1922	32.3115	43.4543	32.6878	34.3063	19.9508	19.7598	17.291	13.6386	12.8294	13.5109	7.5946	17.0904	18.3964	18.6873	20.2268	16.0648	16.5953	17.1172	15.6423	18.1354	19.3564	18.2049	19.1923	14.6841	22.4788
525	40.2348	38.5665	38.8113	39.4144	43.4188	39.9143	39.1019	38.6545	47.8069	42.4138	50.6095	44.0117	43.4341	41.4878	42.8042	36.1467	29.0387	19.695	28.1762	24.3797	24.2574	20.644	32.0064	43.1076	32.2118	43.3219	32.6257	34.2304	19.9377	19.7442	17.2422	13.621	12.8194	13.482	7.5842	17.0656	18.404	18.673	20.1675	16.0866	16.5631	17.1	15.6171	18.0905	19.3325	18.1749	19.14	14.6149	22.4093
526	40.191	38.5191	38.8096	39.3976	43.4096	39.8135	39.1511	38.5959	47.6481	42.2834	50.521	43.8519	43.3396	41.3809	42.747	36.02	29.0036	19.6521	28.188	24.3502	24.1669	20.5687	31.9231	42.9651	32.0966	43.2142	32.5042	34.1441	19.8965	19.6664	17.242	13.6126	12.8021	13.455	7.5846	17.0332	18.3593	18.6215	20.0738	16.026	16.5095	17.0579	15.5772	18.0202	19.2411	18.0891	19.0949	14.5431	22.3343
527	40.0634	38.4038	38.7199	39.2749	43.3025	39.6718	39.0827	38.5354	47.5708	42.2193	50.4965	43.6821	43.2704	41.2945	42.7263	35.9894	28.9353	19.6365	28.1257	24.2653	24.0677	20.5558	31.875	42.9202	31.9837	43.101	32.4282	34.1058	19.9079	19.5994	17.3047	13.6225	12.7881	13.4693	7.5756	16.9739	18.3422	18.5989	20.0229	15.9751	16.4662	17.028	15.5456	17.9932	19.2176	18.0095	19.0805	14.5276	22.3034
528	39.9054	38.2367	38.6159	39.1416	43.191	39.5346	38.9356	38.4386	47.591	42.1779	50.4498	43.5708	43.2433	41.2213	42.6859	35.9366	28.8353	19.5892	28.0821	24.1594	23.9531	20.5324	31.8361	42.9083	31.9138	43.0278	32.3709	34.0319	19.8896	19.5557	17.3583	13.5694	12.7579	13.4452	7.5337	16.9335	18.3351	18.5956	19.9918	15.9597	16.4059	17.0007	15.5154	17.9796	19.2376	17.9626	19.0687	14.5128	22.2949
529	39.7674	38.0775	38.5497	39.0445	43.0452	39.3771	38.8255	38.3897	47.5767	42.037	50.3046	43.4569	43.1364	41.0745	42.5896	35.8225	28.7126	19.5186	28.0182	24.0928	23.8968	20.4742	31.7953	42.7919	31.8142	42.9265	32.276	33.8973	19.8368	19.5051	17.2972	13.474	12.7101	13.3939	7.4894	16.9017	18.3651	18.5705	19.9417	15.9393	16.3784	16.9705	15.5152	17.9579	19.1898	17.9074	19.0366	14.4698	22.2173
530	39.6838	37.934	38.4875	39.0047	42.9967	39.3255	38.7908	38.3434	47.5829	41.8879	50.1535	43.3459	42.9393	40.8863	42.5066	35.6833	28.6535	19.4765	27.9962	24.0659	23.8565	20.4259	31.6996	42.6129	31.6558	42.7549	32.1634	33.7732	19.8173	19.4261	17.2401	13.4195	12.7209	13.3809	7.4927	16.8926	18.3929	18.5564	19.9302	15.9473	16.3556	16.9344	15.5096	17.9314	19.1315	17.8441	18.9787	14.3939	22.1563
531	39.5909	37.8461	38.4343	38.9451	42.9059	39.3083	38.7621	38.2618	47.6282	41.7997	50.0285	43.2958	42.7909	40.768	42.5075	35.5961	28.5566	19.4302	27.9563	23.9954	23.8193	20.4158	31.6619	42.5367	31.5837	42.6191	32.1064	33.7712	19.7799	19.3949	17.2651	13.3783	12.6971	13.3453	7.4985	16.8564	18.4005	18.5612	19.9195	15.9849	16.3439	16.9564	15.4892	17.9259	19.105	17.8279	18.9333	14.3952	22.1073
532	39.499	37.7959	38.3614	38.8803	42.8098	39.2975	38.7741	38.212	47.5739	41.6806	49.9367	43.2323	42.6584	40.7176	42.4666	35.4494	28.4931	19.421	27.931	23.9124	23.7958	20.3992	31.6126	42.5085	31.5445	42.5299	32.0416	33.7458	19.7565	19.3567	17.3057	13.3585	12.6634	13.3219	7.4778	16.8235	18.3589	18.5962	19.8932	16.012	16.3275	16.9543	15.4685	17.9031	19.0779	17.8107	18.9008	14.4188	22.0516
533	39.4829	37.7868	38.3192	38.8236	42.7702	39.2762	38.7378	38.1516	47.498	41.609	49.7401	43.1511	42.5768	40.6642	42.3754	35.3371	28.4067	19.4507	27.9014	23.8806	23.7836	20.4022	31.5913	42.4618	31.4649	42.4819	31.9451	33.643	19.784	19.3347	17.3009	13.3406	12.6579	13.3338	7.4724	16.7965	18.3647	18.6417	19.8729	16.0192	16.2981	16.9579	15.4704	17.9057	19.116	17.7861	18.8967	14.4322	22.0281
534	39.4269	37.7058	38.2466	38.7924	42.6254	39.2123	38.6297	38.0455	47.3881	41.5406	49.6185	43.0597	42.5021	40.573	42.256	35.2468	28.3081	19.4195	27.9187	23.8493	23.7321	20.4079	31.5961	42.3417	31.3905	42.46	31.8475	33.5434	19.8019	19.3169	17.2833	13.3165	12.6248	13.3445	7.4548	16.7627	18.4099	18.6486	19.8701	16.0215	16.2819	16.9626	15.4579	17.9173	19.1783	17.7721	18.8574	14.4044	22.0332
535	39.3938	37.5992	38.1723	38.7318	42.5362	39.1866	38.6067	38.0203	47.2506	41.48	49.492	43.0213	42.4442	40.4759	42.2045	35.1871	28.2374	19.4087	27.9342	23.8354	23.6847	20.3861	31.5647	42.2551	31.2917	42.3653	31.7992	33.4388	19.7673	19.2749	17.2534	13.3093	12.6426	13.3374	7.4569	16.7379	18.4334	18.634	19.874	15.9943	16.2596	16.9555	15.4311	17.9311	19.1922	17.7566	18.7884	14.337	22.0051
536	39.4062	37.5721	38.1397	38.679	42.5387	39.1769	38.6667	38.0633	47.1558	41.3832	49.4348	42.9629	42.3695	40.4132	42.181	35.1552	28.1741	19.4453	27.9715	23.8436	23.6969	20.3731	31.4999	42.2458	31.2294	42.295	31.7891	33.4139	19.7463	19.2522	17.2535	13.3063	12.688	13.324	7.4576	16.7333	18.4484	18.6394	19.8492	15.9522	16.2253	16.9375	15.4089	17.9813	19.1545	17.7071	18.763	14.289	21.9967
537	39.437	37.5679	38.1093	38.6661	42.484	39.2003	38.663	38.0405	47.0915	41.3019	49.3699	42.9241	42.3514	40.3774	42.1788	35.1656	28.1249	19.4347	28.0053	23.8533	23.6944	20.4081	31.5233	42.2752	31.2238	42.2759	31.8211	33.3952	19.7418	19.2554	17.288	13.3266	12.7005	13.3072	7.4783	16.7271	18.4735	18.6432	19.8411	15.9567	16.2198	16.9269	15.4516	18.0081	19.1391	17.6779	18.7826	14.2922	22.0116
538	39.4209	37.5315	38.0856	38.6338	42.3648	39.1235	38.6558	37.9334	47.0463	41.1656	49.2394	42.8044	42.335	40.3328	42.1269	35.1359	28.0934	19.3741	28.006	23.8337	23.6834	20.445	31.5577	42.2917	31.2128	42.2761	31.8288	33.3707	19.7295	19.2498	17.3704	13.2809	12.6799	13.2782	7.4422	16.6912	18.5191	18.7006	19.8548	15.9743	16.195	16.9267	15.5209	18.0436	19.1617	17.6815	18.8134	14.3073	22.0265
539	39.4153	37.4767	38.0571	38.5649	42.2616	39.0214	38.6434	37.8373	47.0245	41.0517	49.1257	42.7075	42.2696	40.2553	42.1111	35.1051	28.0614	19.3256	28.0423	23.7894	23.6408	20.4397	31.5596	42.2225	31.181	42.244	31.7752	33.2853	19.7061	19.2403	17.3797	13.1952	12.6722	13.2624	7.4046	16.6116	18.509	18.729	19.8115	15.9801	16.1629	16.8996	15.5342	18.0091	19.1719	17.7037	18.8034	14.3103	21.9953
540	39.4012	37.4339	38.0156	38.4986	42.2655	39.0062	38.5603	37.8137	46.9919	40.9622	49.1091	42.6282	42.1808	40.2128	42.0133	35.0371	28.0223	19.3521	28.0723	23.7804	23.5979	20.4085	31.4752	42.107	31.1488	42.1747	31.6974	33.2386	19.6881	19.2185	17.3758	13.1684	12.7028	13.2644	7.398	16.5933	18.5302	18.7381	19.7618	15.9574	16.1322	16.9021	15.5108	18.002	19.162	17.704	18.7578	14.2759	21.9463
541	39.3016	37.3856	37.8987	38.4124	42.2785	38.9465	38.4765	37.8155	46.8076	40.8133	49.0039	42.468	42.0577	40.1041	41.8472	34.9112	27.9114	19.3265	28.039	23.7604	23.5323	20.3693	31.3484	41.9779	31.0548	42.0076	31.5818	33.1227	19.6591	19.1944	17.3956	13.1739	12.7019	13.2459	7.3943	16.6097	18.5805	18.7577	19.7316	15.9118	16.1166	16.8984	15.5024	18.0164	19.1474	17.7011	18.6805	14.2502	21.875
542	39.2303	37.2759	37.7904	38.3377	42.2546	38.8495	38.4431	37.8008	46.6836	40.6719	48.8741	42.3644	41.9284	40.0009	41.6799	34.8435	27.8295	19.3268	28.0171	23.6857	23.4653	20.3619	31.2332	41.8836	30.9882	41.8588	31.5437	33.0405	19.643	19.1879	17.4377	13.1563	12.6644	13.1996	7.3771	16.5781	18.6467	18.7893	19.7082	15.9053	16.1347	16.9496	15.5321	18.0498	19.1516	17.691	18.6582	14.272	21.8562
543	39.219	37.1449	37.6957	38.2756	42.2317	38.761	38.4104	37.7835	46.6793	40.6096	48.9354	42.3615	41.9197	40.037	41.6213	34.8152	27.7515	19.3208	27.9541	23.6518	23.4094	20.4163	31.182	41.9472	30.9763	41.8348	31.5639	33.0884	19.6939	19.1919	17.4759	13.1409	12.615	13.1708	7.353	16.5217	18.7665	18.8656	19.7522	15.9367	16.1891	17.0141	15.5776	18.0849	19.1962	17.7515	18.6963	14.2941	21.843
544	39.1687	37.0927	37.5857	38.1623	42.1973	38.6456	38.3992	37.7345	46.6352	40.5804	49.0179	42.3696	41.8634	40.0587	41.6643	34.7807	27.6871	19.3268	27.9631	23.6163	23.369	20.4533	31.167	42.0641	30.9967	41.8298	31.5343	33.089	19.7511	19.2067	17.5037	13.114	12.617	13.1795	7.317	16.4792	18.8725	18.9153	19.8275	15.9632	16.219	17.0606	15.5991	18.1295	19.251	17.7985	18.7297	14.3292	21.8806
545	39.2268	37.0575	37.5375	38.129	42.1461	38.599	38.4854	37.639	46.5464	40.4942	49.0309	42.3668	41.8476	40.0445	41.665	34.7239	27.6473	19.3861	28.0013	23.5863	23.3657	20.461	31.1324	42.0666	30.9781	41.7295	31.509	33.0161	19.7521	19.2127	17.5506	13.1458	12.6604	13.2491	7.3146	16.4912	18.9403	18.9713	19.7982	15.9554	16.2381	17.1082	15.6267	18.1375	19.3023	17.7856	18.7007	14.3298	21.8658
546	39.2761	37.0581	37.4741	38.0731	42.1535	38.5818	38.5359	37.6395	46.5312	40.4616	49.0472	42.403	41.8144	40.0334	41.6749	34.7214	27.6098	19.4404	28.039	23.5829	23.3803	20.4792	31.0665	42.1075	30.9228	41.6561	31.539	33.0173	19.7407	19.2359	17.5734	13.1663	12.7198	13.2967	7.335	16.5096	18.972	19.0129	19.7349	15.9474	16.2539	17.1661	15.6938	18.156	19.3841	17.8415	18.7244	14.3254	21.8934
547	39.2423	36.9878	37.4152	38.0114	42.1162	38.5122	38.4715	37.6421	46.46	40.3764	48.9524	42.3738	41.7369	39.9936	41.6089	34.637	27.5599	19.4279	28.1417	23.5542	23.3753	20.4616	30.9699	42.0769	30.8403	41.5927	31.4923	32.9446	19.6739	19.1896	17.5793	13.1404	12.747	13.2805	7.3374	16.4907	18.9573	19.0212	19.695	15.9059	16.2229	17.1775	15.722	18.1525	19.4067	17.8582	18.7038	14.279	21.8587
548	39.2313	36.9642	37.3326	37.9379	42.1261	38.4138	38.4733	37.6703	46.3895	40.319	48.9074	42.3201	41.6881	39.9553	41.5379	34.5553	27.5465	19.397	28.2189	23.5334	23.3815	20.4458	30.9041	42.0643	30.7655	41.5732	31.4389	32.8793	19.6542	19.1787	17.5784	13.1333	12.7325	13.254	7.3277	16.4511	19.0085	19.0483	19.7315	15.8691	16.2486	17.2206	15.7368	18.1925	19.4361	17.8415	18.6678	14.2609	21.8243
549	39.2209	37.0045	37.3218	37.9069	42.1522	38.3564	38.4838	37.6593	46.3705	40.326	48.9287	42.3112	41.6753	39.9767	41.5908	34.5291	27.5411	19.3987	28.2851	23.5233	23.4114	20.437	30.8788	42.0949	30.7583	41.5373	31.424	32.9143	19.6873	19.1695	17.5863	13.0979	12.7221	13.236	7.3194	16.4356	19.0867	19.0877	19.7865	15.8689	16.2863	17.2469	15.761	18.2558	19.4663	17.8546	18.6528	14.265	21.8015
550	39.1724	37.0337	37.3439	37.8807	42.0851	38.3237	38.4601	37.654	46.3124	40.2834	48.9624	42.3067	41.7084	39.9664	41.6452	34.5208	27.4886	19.4241	28.3085	23.5317	23.4404	20.4443	30.8589	42.1782	30.7585	41.5149	31.398	32.9236	19.6805	19.1964	17.6137	13.1319	12.7419	13.2602	7.3231	16.4228	19.1667	19.1218	19.8338	15.872	16.3818	17.265	15.8303	18.3549	19.5248	17.8844	18.6862	14.2949	21.7955
551	39.1038	36.9791	37.4058	37.8612	42.0275	38.3492	38.3968	37.6184	46.2204	40.2286	48.9471	42.2388	41.7059	39.8906	41.6072	34.4806	27.4839	19.4468	28.3286	23.5085	23.4643	20.4726	30.8545	42.1794	30.7414	41.4773	31.3605	32.9005	19.6472	19.2028	17.6435	13.1478	12.7558	13.2572	7.3016	16.4249	19.2384	19.1402	19.8254	15.858	16.4308	17.2653	15.9102	18.3928	19.5378	17.9086	18.7161	14.2964	21.762
552	39.072	36.9489	37.3821	37.8976	42.0305	38.4125	38.3029	37.605	46.1865	40.1886	48.8981	42.1697	41.6425	39.8219	41.5803	34.4642	27.5096	19.5082	28.3462	23.4804	23.4893	20.4635	30.8581	42.1814	30.6845	41.4447	31.3501	32.9013	19.6367	19.2359	17.6418	13.1673	12.7601	13.2738	7.3125	16.4464	19.3256	19.1281	19.821	15.8704	16.4562	17.267	15.8913	18.3888	19.5337	17.9163	18.71	14.2841	21.7423
553	39.0315	36.9382	37.3281	37.8657	41.9615	38.413	38.1911	37.5201	46.1441	40.1534	48.8247	42.0411	41.5865	39.746	41.5606	34.4458	27.4483	19.4847	28.3159	23.4409	23.4308	20.4365	30.7996	42.1972	30.6456	41.3777	31.264	32.8635	19.6307	19.2169	17.6114	13.1454	12.7255	13.2504	7.2866	16.3966	19.3894	19.1243	19.8093	15.8684	16.4524	17.2904	15.8653	18.3959	19.5388	17.9172	18.6713	14.266	21.6794
554	38.9642	36.8799	37.2285	37.7551	41.8651	38.3747	38.1498	37.4095	46.0815	40.1314	48.7775	41.9738	41.575	39.7066	41.5484	34.4179	27.3999	19.4495	28.3315	23.3823	23.3954	20.4206	30.7639	42.1876	30.6667	41.3426	31.2078	32.8408	19.609	19.179	17.5809	13.1255	12.7009	13.1927	7.2686	16.343	19.4486	19.1108	19.8161	15.8429	16.4477	17.3451	15.8679	18.4433	19.5966	17.9303	18.625	14.2701	21.6551
555	38.9347	36.8505	37.2162	37.7361	41.8296	38.435	38.2271	37.3753	46.011	40.1649	48.7687	41.9727	41.5628	39.6644	41.5813	34.4448	27.4637	19.5085	28.4265	23.3869	23.4866	20.4259	30.8153	42.2255	30.634	41.3366	31.2245	32.8735	19.6345	19.2152	17.5679	13.1547	12.7503	13.1762	7.2866	16.3952	19.5197	19.1125	19.8224	15.8395	16.4501	17.3776	15.8693	18.4957	19.6686	17.952	18.62	14.2987	21.6676
556	38.8881	36.8501	37.1644	37.7676	41.7618	38.4661	38.215	37.3308	45.9552	40.1821	48.7728	41.9539	41.5415	39.6509	41.5731	34.5154	27.441	19.5231	28.4611	23.3819	23.4807	20.4411	30.8209	42.2767	30.6083	41.295	31.2375	32.8717	19.657	19.2481	17.5766	13.1814	12.7475	13.1742	7.3014	16.4051	19.5917	19.1226	19.8212	15.8104	16.4654	17.4035	15.8516	18.5423	19.7193	17.9797	18.6079	14.2992	21.6525
557	38.8297	36.7924	37.0656	37.7652	41.7138	38.4557	38.1617	37.2316	45.8219	40.0848	48.7607	41.8944	41.4611	39.5596	41.5228	34.4638	27.3879	19.5343	28.4311	23.2885	23.3921	20.4198	30.7439	42.2654	30.5437	41.1668	31.195	32.7823	19.5893	19.2012	17.576	13.1404	12.6834	13.1618	7.276	16.3911	19.6216	19.088	19.7855	15.741	16.4527	17.3748	15.8013	18.5257	19.7128	17.9723	18.5651	14.2667	21.5783
558	38.7766	36.7417	37.0111	37.738	41.677	38.3982	38.1524	37.2136	45.7469	40.0016	48.8039	41.8894	41.4038	39.47	41.4969	34.4285	27.3371	19.5344	28.4429	23.2431	23.3533	20.3995	30.7404	42.2889	30.4584	41.0603	31.1547	32.7557	19.5842	19.1789	17.5993	13.1175	12.6903	13.1789	7.2655	16.3711	19.6481	19.1069	19.817	15.7094	16.4847	17.3795	15.8394	18.534	19.6969	17.9651	18.5621	14.2729	21.5693
559	38.7596	36.7267	37.0061	37.7048	41.6328	38.343	38.1581	37.1957	45.7131	39.9768	48.7839	41.8933	41.3373	39.373	41.4566	34.4473	27.3698	19.5065	28.476	23.2515	23.3356	20.4025	30.7796	42.3025	30.412	40.9911	31.1298	32.7286	19.6243	19.1887	17.6565	13.0749	12.6742	13.208	7.2503	16.3716	19.6936	19.171	19.8701	15.7433	16.5697	17.417	15.8956	18.6159	19.7259	18.0284	18.6081	14.3301	21.5743
560	38.7099	36.6722	36.9068	37.6282	41.5866	38.1817	38.1514	37.1097	45.6886	40.0157	48.7376	41.9059	41.3196	39.3649	41.4004	34.4658	27.366	19.4843	28.4869	23.1822	23.3034	20.4002	30.7596	42.2705	30.3988	40.9214	31.0941	32.728	19.6719	19.2041	17.7147	13.0468	12.6389	13.1787	7.2312	16.3787	19.7573	19.1913	19.918	15.7721	16.6242	17.4389	15.9468	18.6542	19.7784	18.0537	18.6182	14.3548	21.5964
561	38.6935	36.6676	36.8653	37.5963	41.634	38.1396	38.1813	37.0984	45.6847	40.0932	48.7608	41.9385	41.3032	39.3103	41.3817	34.5075	27.3877	19.4955	28.4548	23.1621	23.2864	20.3865	30.7224	42.2386	30.4159	40.9089	31.0823	32.754	19.6722	19.2023	17.731	13.0703	12.6516	13.1913	7.2297	16.3919	19.812	19.1911	19.9623	15.7832	16.6514	17.4517	15.958	18.6869	19.7895	18.071	18.6171	14.3637	21.5831
562	38.6713	36.661	36.8341	37.6227	41.6647	38.0671	38.2329	37.0724	45.642	40.1417	48.7736	41.9087	41.2209	39.2536	41.3329	34.5489	27.3857	19.5075	28.3953	23.1512	23.3072	20.3858	30.6954	42.17	30.4147	40.8057	31.0241	32.7586	19.6324	19.1811	17.7327	13.0974	12.671	13.1837	7.2362	16.4011	19.8607	19.2113	19.9793	15.7795	16.6823	17.4582	15.9701	18.6993	19.7885	18.1009	18.5809	14.3751	21.5638
563	38.5669	36.6097	36.7633	37.5391	41.6757	37.986	38.2348	36.9939	45.5611	40.102	48.7635	41.9641	41.148	39.2054	41.3474	34.5411	27.3618	19.4826	28.2615	23.1273	23.2824	20.4067	30.7454	42.0636	30.3647	40.7503	31.0202	32.7589	19.6442	19.1888	17.7307	13.0994	12.6581	13.1845	7.23	16.3798	19.9376	19.2655	20.0023	15.8021	16.7306	17.4944	15.9854	18.7694	19.8078	18.1341	18.5826	14.3854	21.5464
564	38.5064	36.5045	36.6945	37.4872	41.6386	37.8694	38.2371	36.9188	45.5979	40.1282	48.774	42.0156	41.1626	39.1796	41.345	34.5877	27.3383	19.4438	28.1624	23.0661	23.2547	20.4163	30.7695	41.9974	30.3311	40.7479	31.0374	32.7997	19.6993	19.2259	17.7583	13.1089	12.6067	13.1754	7.2103	16.3984	20.0214	19.2669	19.9991	15.8202	16.7688	17.5231	15.9973	18.8451	19.8826	18.1832	18.5802	14.414	21.5552
565	38.5208	36.4584	36.6914	37.557	41.709	37.8168	38.2871	36.9061	45.6563	40.214	48.8221	42.0349	41.1561	39.1796	41.3405	34.6729	27.3361	19.4893	28.1653	23.06	23.2527	20.4321	30.8136	42.0411	30.3444	40.7318	31.0782	32.8486	19.7715	19.2481	17.749	13.1251	12.6266	13.2038	7.2121	16.4455	20.0847	19.2445	19.9943	15.8394	16.772	17.5244	16.0025	18.8984	19.924	18.2459	18.6174	14.4321	21.567
566	38.5372	36.4211	36.6985	37.6012	41.7268	37.8215	38.291	36.8948	45.6689	40.2623	48.8786	42.1119	41.1522	39.2014	41.3753	34.7414	27.3542	19.5258	28.1829	23.0419	23.2678	20.4793	30.8989	42.0615	30.3685	40.7294	31.1307	32.9115	19.831	19.2871	17.7704	13.1589	12.6353	13.2194	7.2045	16.488	20.1646	19.2618	20.0343	15.8579	16.792	17.5255	16.0273	18.9277	19.9712	18.298	18.6395	14.4598	21.5487
567	38.5868	36.4179	36.6958	37.6158	41.7065	37.8212	38.2912	36.8925	45.6709	40.2574	48.9132	42.1266	41.1184	39.2066	41.3891	34.7876	27.4158	19.5532	28.1491	23.0183	23.2519	20.5339	30.9484	42.047	30.4248	40.732	31.1822	32.9516	19.8799	19.3325	17.8146	13.2011	12.6603	13.2467	7.1958	16.5211	20.2521	19.2555	20.0817	15.8656	16.8981	17.5676	16.0697	18.9722	20.052	18.377	18.6224	14.5124	21.559
568	38.5332	36.3681	36.6781	37.6012	41.6807	37.7839	38.2457	36.8178	45.5981	40.2629	48.9548	42.1167	41.0677	39.154	41.3698	34.7915	27.4091	19.5731	28.0777	22.9703	23.2111	20.559	30.9233	41.9837	30.4434	40.7147	31.1848	32.9686	19.9336	19.3915	17.8626	13.1797	12.6582	13.2435	7.1761	16.5359	20.3027	19.2667	20.119	15.8864	16.98	17.6405	16.1304	18.9964	20.1222	18.4561	18.6431	14.5797	21.6009
569	38.5034	36.346	36.6266	37.5881	41.7173	37.7571	38.2072	36.7545	45.4929	40.1897	48.8991	42.038	40.9874	39.0423	41.2416	34.7003	27.4081	19.5905	28.0677	22.9832	23.1953	20.5541	30.8732	41.8636	30.3873	40.6265	31.1507	32.9169	19.8997	19.3789	17.8749	13.1776	12.6478	13.2443	7.1693	16.5518	20.3157	19.2877	20.1184	15.896	17.0272	17.6374	16.1261	18.9641	20.1563	18.4594	18.6413	14.58	21.5508
570	38.4512	36.2904	36.5352	37.4776	41.7164	37.6827	38.1945	36.6813	45.5075	40.1322	48.79	41.915	40.9027	38.9632	41.172	34.6226	27.3176	19.5787	28.0327	22.9685	23.1981	20.5789	30.8486	41.7854	30.3433	40.5304	31.1552	32.9101	19.8853	19.3865	17.8709	13.1428	12.6151	13.2334	7.1498	16.563	20.3754	19.3176	20.1264	15.9216	17.0855	17.6386	16.1163	19.0093	20.1701	18.479	18.6488	14.5757	21.5092
571	38.4026	36.1843	36.4758	37.354	41.707	37.5962	38.124	36.5417	45.5114	40.0804	48.6779	41.8719	40.793	38.8933	41.1371	34.5967	27.2493	19.518	27.927	22.9117	23.1607	20.6053	30.8577	41.7569	30.3932	40.4861	31.1231	32.9184	19.8859	19.4145	17.8987	13.1268	12.598	13.2331	7.1342	16.5659	20.4131	19.3399	20.1617	15.9275	17.135	17.6351	16.1518	19.0378	20.1965	18.5194	18.6766	14.6082	21.5054
572	38.35	36.1289	36.448	37.3275	41.7294	37.5379	38.0833	36.4472	45.4012	40.0071	48.6501	41.7519	40.6962	38.8179	41.0556	34.5416	27.2297	19.4802	27.8586	22.9433	23.0917	20.5815	30.8399	41.7274	30.3977	40.4428	31.0809	32.8535	19.8856	19.4086	17.9116	13.1421	12.5967	13.2487	7.1571	16.5711	20.4598	19.353	20.1845	15.9426	17.1569	17.5994	16.1835	19.0618	20.1916	18.5303	18.6901	14.6633	21.4971
573	38.3126	36.0732	36.4132	37.3814	41.8006	37.5359	38.0073	36.3627	45.3513	39.9865	48.7445	41.7132	40.7163	38.8438	41.0331	34.5617	27.2484	19.4721	27.8109	22.9334	23.0296	20.6364	30.8835	41.7725	30.4269	40.4328	31.158	32.8796	19.9359	19.4957	17.9528	13.1721	12.6045	13.2686	7.1645	16.609	20.5289	19.3803	20.2041	15.9805	17.1954	17.6401	16.2324	19.1125	20.2065	18.571	18.755	14.7349	21.5241
574	38.3065	36.0289	36.3591	37.4029	41.778	37.5349	37.9441	36.343	45.3809	40.0244	48.8085	41.7566	40.7779	38.9135	41.0715	34.594	27.2365	19.4854	27.8249	22.9055	22.972	20.6718	30.9456	41.8421	30.4618	40.477	31.223	32.9414	19.9752	19.5819	18.0076	13.1661	12.6024	13.278	7.1379	16.6584	20.6026	19.4233	20.2071	15.9786	17.2608	17.6777	16.2523	19.1634	20.2474	18.6199	18.802	14.8097	21.5758
575	38.2288	35.8994	36.263	37.3357	41.7108	37.4735	37.852	36.2414	45.3601	40.0095	48.7754	41.751	40.8189	38.9441	41.0345	34.561	27.1515	19.419	27.8455	22.8145	22.88	20.6726	30.9559	41.7853	30.4568	40.4763	31.2067	32.9296	20.009	19.6064	18.043	13.1495	12.5296	13.2433	7.0873	16.6803	20.6837	19.3929	20.222	15.9614	17.3134	17.6857	16.2248	19.1762	20.239	18.6749	18.8089	14.8579	21.5582
576	38.1495	35.7856	36.2097	37.2923	41.692	37.4427	37.8049	36.1469	45.2739	39.8962	48.7053	41.7024	40.774	38.8815	40.9364	34.4279	27.0935	19.3783	27.8292	22.7403	22.8352	20.6501	30.839	41.6909	30.3953	40.3317	31.1281	32.8595	20.032	19.561	18.0441	13.109	12.481	13.2236	7.0678	16.6836	20.7255	19.3899	20.2633	16.0137	17.3451	17.6416	16.1899	19.1522	20.2204	18.695	18.7678	14.8719	21.5047
577	38.1157	35.7953	36.2003	37.2659	41.6524	37.4567	37.8084	36.1109	45.2058	39.8174	48.6518	41.652	40.7343	38.789	40.8853	34.3568	27.0507	19.4122	27.8272	22.7226	22.8247	20.6941	30.765	41.6512	30.3594	40.2659	31.095	32.8666	20.056	19.5622	18.0456	13.0956	12.4847	13.1747	7.0758	16.6669	20.7575	19.4201	20.3044	16.0749	17.3954	17.6353	16.2386	19.1899	20.2714	18.7456	18.7767	14.8994	21.5229
578	38.058	35.8353	36.2252	37.2035	41.6695	37.4557	37.7692	36.0449	45.1302	39.8312	48.6016	41.6533	40.7032	38.7976	40.8937	34.3399	27.0501	19.4598	27.8873	22.7489	22.8284	20.7135	30.7714	41.6288	30.3664	40.3051	31.1318	32.8846	20.0606	19.5851	18.0878	13.1238	12.5024	13.1629	7.0792	16.6444	20.7811	19.4196	20.2944	16.0891	17.4173	17.6604	16.3331	19.2104	20.3217	18.793	18.83	14.9365	21.5381
579	37.9889	35.8577	36.2377	37.1223	41.6741	37.4772	37.8027	36.0239	45.083	39.8479	48.5606	41.665	40.6881	38.8068	40.8977	34.3059	27.0823	19.4718	27.9671	22.7594	22.7442	20.732	30.8189	41.5196	30.3048	40.3569	31.155	32.8995	20.0686	19.6203	18.1077	13.1654	12.5562	13.1827	7.0865	16.6417	20.7964	19.4018	20.3017	16.0974	17.4175	17.654	16.3498	19.2288	20.3484	18.8226	18.8449	14.9579	21.5452
580	38.0142	35.86	36.2066	37.0915	41.6452	37.5135	37.7936	36.011	45.0354	39.8105	48.5044	41.6712	40.6401	38.8162	40.8319	34.2706	27.0718	19.4813	27.9073	22.7336	22.675	20.6961	30.8297	41.3822	30.2447	40.314	31.1506	32.8656	20.0757	19.6089	18.1086	13.1325	12.5371	13.1699	7.0819	16.6477	20.8366	19.4244	20.3284	16.0753	17.4173	17.6123	16.314	19.2558	20.3546	18.8435	18.8382	14.9484	21.5305
581	37.9993	35.8493	36.1596	37.0765	41.6084	37.5051	37.807	35.9783	44.9967	39.7279	48.4217	41.6541	40.5245	38.7828	40.7455	34.2107	27.0343	19.5089	27.8751	22.6788	22.6473	20.6427	30.8198	41.2399	30.1705	40.0859	31.0851	32.8431	20.0821	19.5929	18.0976	13.1116	12.5364	13.1812	7.0868	16.6968	20.8899	19.4287	20.298	16.0398	17.417	17.5906	16.304	19.3212	20.369	18.8344	18.8112	14.9168	21.4985
582	37.9838	35.8874	36.1564	37.019	41.596	37.4428	37.7932	35.8979	44.9393	39.6246	48.301	41.57	40.4355	38.716	40.6443	34.1203	26.9806	19.5018	27.896	22.6094	22.59	20.6044	30.8154	41.138	30.1047	39.9509	31.0196	32.8551	20.0665	19.5893	18.0295	13.0961	12.5356	13.2065	7.0924	16.7684	20.9798	19.4401	20.301	16.0491	17.4382	17.5809	16.3258	19.368	20.3781	18.86	18.8088	14.9294	21.4711
583	38.0026	35.9462	36.2173	37.0572	41.6251	37.4576	37.7618	35.9359	44.8724	39.499	48.1996	41.4817	40.3902	38.6202	40.5227	34.0351	26.9762	19.5237	27.9243	22.653	22.5807	20.6136	30.8336	41.1004	30.0345	39.9102	30.9991	32.8638	20.0424	19.6055	17.996	13.1172	12.5465	13.2201	7.1163	16.8433	21.0489	19.4274	20.3101	16.0809	17.4784	17.6251	16.3405	19.382	20.4218	18.8746	18.8165	14.9552	21.448
584	37.9855	35.9542	36.2384	37.0556	41.6273	37.4491	37.7455	35.9505	44.7749	39.48	48.1336	41.4748	40.3782	38.6241	40.4612	34.0135	26.9542	19.524	27.9222	22.6331	22.5867	20.6442	30.8364	41.0726	30.0281	39.8957	30.9948	32.9473	20.0758	19.6543	18.0629	13.1287	12.5297	13.2531	7.0958	16.8941	21.0842	19.465	20.3792	16.1421	17.4852	17.678	16.3573	19.4136	20.4945	18.944	18.8528	15.008	21.4885
585	37.9677	35.921	36.2412	36.9876	41.5838	37.4279	37.7973	35.9439	44.7721	39.5182	48.0316	41.4957	40.3759	38.685	40.4234	34.033	26.9499	19.5367	27.9378	22.6068	22.5889	20.6891	30.8657	41.1858	30.1434	39.9349	30.9895	33.0633	20.1568	19.7208	18.1432	13.1557	12.5561	13.2666	7.0809	16.921	21.1459	19.5492	20.4398	16.2233	17.5112	17.711	16.4073	19.4728	20.5681	19.0455	18.9228	15.0438	21.4998
586	37.9602	35.904	36.2404	36.9067	41.5757	37.3622	37.8123	35.9634	44.8098	39.5105	47.9814	41.5586	40.4238	38.6911	40.4193	34.0419	26.9343	19.5168	27.9816	22.619	22.5786	20.7186	30.8857	41.2261	30.1635	39.9515	31.042	33.1409	20.2274	19.7733	18.1927	13.172	12.5898	13.3143	7.0882	16.9598	21.1687	19.5706	20.4717	16.2711	17.5115	17.7259	16.4561	19.5183	20.6021	19.1017	18.9767	15.0954	21.5316
587	37.8877	35.7722	36.1617	36.8102	41.5358	37.3101	37.8117	35.9222	44.7368	39.4525	47.8472	41.5105	40.3876	38.5686	40.2825	33.9576	26.8928	19.4843	27.9627	22.5762	22.4955	20.7154	30.8414	41.1718	30.1267	39.8599	30.9867	33.1295	20.2264	19.7729	18.2052	13.1578	12.594	13.3045	7.0783	16.9692	21.1733	19.5632	20.4696	16.2988	17.4458	17.6938	16.4028	19.4812	20.5946	19.0806	18.9618	15.1035	21.4739
588	37.839	35.6774	36.0805	36.7011	41.4716	37.262	37.7675	35.8495	44.6951	39.3206	47.7926	41.4412	40.3213	38.4285	40.1825	33.8936	26.8481	19.4165	27.9036	22.5283	22.4026	20.6565	30.8261	41.0535	30.0669	39.7632	30.9131	33.0741	20.1576	19.7523	18.1766	13.1139	12.5702	13.2809	7.0263	16.9615	21.1573	19.5268	20.4179	16.2738	17.385	17.6936	16.3752	19.3797	20.5267	19.0444	18.9474	15.0649	21.3958
589	37.7609	35.558	36.0242	36.599	41.4261	37.1953	37.6273	35.8275	44.6737	39.1634	47.6797	41.3884	40.3073	38.3449	40.1765	33.8252	26.7589	19.35	27.8211	22.4841	22.3805	20.6346	30.8386	40.9782	30.0801	39.7572	30.8719	33.0311	20.1377	19.7527	18.1431	13.0814	12.5533	13.295	6.9919	16.9268	21.1637	19.487	20.347	16.2291	17.3389	17.6582	16.3348	19.3605	20.5294	19.0621	18.927	15.0549	21.3479
590	37.7065	35.4628	35.9097	36.5383	41.3406	37.0798	37.5238	35.801	44.6345	38.9965	47.58	41.3304	40.2463	38.2972	40.1584	33.7229	26.707	19.3263	27.7684	22.4751	22.3117	20.6054	30.8534	40.9708	30.0586	39.6904	30.7978	33.0105	20.1554	19.7415	18.1542	13.0455	12.5477	13.3005	6.9964	16.9243	21.1701	19.5188	20.4066	16.2008	17.3014	17.6163	16.3218	19.349	20.528	19.0812	18.8892	15.0586	21.301
591	37.6726	35.3953	35.7754	36.4777	41.2576	36.9746	37.4292	35.781	44.5593	38.9126	47.5051	41.3477	40.1793	38.2974	40.1377	33.681	26.6498	19.3247	27.7259	22.4479	22.2845	20.6022	30.8564	40.9782	30.03	39.6546	30.7418	32.9918	20.2054	19.764	18.1953	13.0136	12.5173	13.2552	6.9668	16.8922	21.2506	19.6033	20.4519	16.221	17.3292	17.6277	16.4313	19.4335	20.5483	19.1845	18.9283	15.1238	21.3278
592	37.6809	35.4081	35.663	36.4584	41.1301	36.8919	37.3243	35.7371	44.5356	38.8671	47.5101	41.3851	40.2075	38.2887	40.1559	33.6955	26.5959	19.2747	27.7868	22.3851	22.2845	20.6327	30.9278	40.9643	30.0355	39.7003	30.7605	32.9626	20.2914	19.7683	18.2325	12.9917	12.4572	13.2676	6.9235	16.9035	21.2894	19.6542	20.4841	16.2764	17.3542	17.6426	16.5091	19.4991	20.5872	19.2622	18.9937	15.1787	21.3465
593	37.7252	35.445	35.6079	36.5123	41.1032	36.9267	37.2873	35.7768	44.6488	38.8478	47.6721	41.4337	40.3236	38.3774	40.2538	33.7894	26.5509	19.2955	27.9226	22.4251	22.3404	20.7097	31.004	41.0438	30.098	39.8178	30.9067	33.0638	20.3718	19.8155	18.321	13.0265	12.5065	13.353	6.9796	17.0018	21.3693	19.7323	20.4962	16.3307	17.3964	17.7227	16.5532	19.5675	20.6228	19.3369	19.0517	15.2354	21.4044
594	37.7177	35.5218	35.5887	36.4494	41.1082	36.972	37.319	35.8303	44.6632	38.8337	47.7016	41.4967	40.3647	38.4533	40.2971	33.8338	26.5664	19.3717	27.972	22.4232	22.3768	20.7437	31.0843	41.1585	30.1263	39.8761	30.9986	33.0848	20.4411	19.8563	18.3555	13.0741	12.5678	13.3794	7.0218	17.0694	21.4271	19.7625	20.4971	16.3361	17.3929	17.751	16.5468	19.5728	20.6229	19.3932	19.0828	15.2741	21.4163
595	37.7114	35.4726	35.5097	36.3754	41.0629	36.9725	37.2931	35.7365	44.7532	38.8084	47.6979	41.493	40.3974	38.4684	40.3614	33.9055	26.5089	19.41	27.9182	22.3712	22.3532	20.7286	31.0862	41.2138	30.1175	39.9021	31.017	33.0743	20.4561	19.8709	18.3672	13.0504	12.5587	13.3314	6.9968	17.0347	21.4588	19.7651	20.5395	16.3312	17.401	17.7396	16.5252	19.5692	20.7004	19.4696	19.0728	15.2764	21.4162
596	37.6276	35.3659	35.3098	36.1977	40.8856	36.8773	37.1667	35.5857	44.815	38.7129	47.7044	41.4302	40.3753	38.4468	40.4135	33.9015	26.4236	19.3782	27.8357	22.3144	22.2831	20.6673	31.0793	41.1585	30.127	39.8546	31.0085	33.1037	20.4435	19.8733	18.3606	12.9968	12.4876	13.2977	6.9488	16.9741	21.5097	19.7987	20.5487	16.3846	17.4039	17.7608	16.5658	19.5599	20.7383	19.5239	19.0772	15.2517	21.4372
597	37.5563	35.3292	35.1487	36.1121	40.7226	36.8029	37.008	35.5197	44.5974	38.5559	47.5739	41.2624	40.2121	38.3139	40.2677	33.7429	26.3269	19.3481	27.8088	22.276	22.2128	20.5987	30.9709	40.9337	30.0861	39.7147	30.8917	33.0317	20.384	19.8165	18.3253	12.9518	12.4523	13.2892	6.9271	16.9608	21.4831	19.7688	20.4867	16.3982	17.3573	17.7039	16.5885	19.5351	20.6993	19.4977	19.0832	15.2366	21.3727
598	37.4299	35.2493	35.0594	36.0666	40.6129	36.7285	36.8934	35.4903	44.4048	38.5193	47.5346	41.1555	40.1536	38.2434	40.1712	33.7203	26.2527	19.3482	27.7357	22.2122	22.1317	20.5894	30.9521	40.892	30.0445	39.6515	30.8022	32.9542	20.3873	19.8191	18.348	12.8874	12.4508	13.2517	6.9266	16.9129	21.5199	19.8231	20.5045	16.4466	17.3843	17.7307	16.6509	19.5871	20.689	19.5412	19.1065	15.2177	21.2749
599	37.3674	35.1941	35.0168	36.0399	40.5398	36.717	36.8749	35.4647	44.353	38.5322	47.5725	41.0582	40.1076	38.1913	40.1103	33.7099	26.2116	19.3743	27.7051	22.1797	22.1148	20.5587	30.9794	40.9035	30.0332	39.6538	30.749	32.929	20.4065	19.8448	18.3772	12.8616	12.4704	13.2453	6.9466	16.91	21.5452	19.8516	20.5229	16.4721	17.3836	17.7191	16.6961	19.6049	20.7032	19.5206	19.0642	15.1981	21.2451
600	37.2818	35.16	34.9343	35.9588	40.57	36.7674	36.8721	35.4537	44.4156	38.5663	47.6175	41.0338	40.1578	38.2122	40.1293	33.7035	26.162	19.3651	27.7663	22.1994	22.1607	20.5613	31.0311	40.9646	30.0469	39.5996	30.737	32.9539	20.4541	19.9093	18.4388	12.9416	12.4894	13.297	6.9594	16.9742	21.59	19.921	20.5365	16.5101	17.3605	17.7387	16.7037	19.6158	20.7776	19.5851	19.0682	15.2048	21.2628
601	37.2638	35.192	34.9327	35.9364	40.6034	36.8044	36.9127	35.5018	44.4601	38.5566	47.7076	41.0473	40.1554	38.2359	40.1255	33.6823	26.0995	19.358	27.8065	22.2139	22.191	20.6034	31.0533	40.9762	30.0458	39.5811	30.765	33.0432	20.4829	19.9108	18.4717	12.9613	12.5229	13.3296	7.0136	17.0199	21.6822	19.935	20.5401	16.5369	17.3784	17.7743	16.7017	19.599	20.8102	19.5883	19.0665	15.2212	21.2612
602	37.2157	35.2054	34.9755	35.8663	40.5936	36.8072	36.872	35.5534	44.5043	38.5567	47.8019	41.1017	40.1131	38.1929	40.1111	33.6292	26.093	19.3808	27.7198	22.1511	22.1396	20.6451	31.1088	41.0115	30.0029	39.5378	30.8163	33.0517	20.48	19.9007	18.4269	12.9501	12.5019	13.3263	7.0133	17.0499	21.779	19.9188	20.5455	16.5641	17.3499	17.7237	16.6795	19.5239	20.7872	19.6214	19.0491	15.2127	21.277
603	37.109	35.142	34.8945	35.8127	40.5512	36.7705	36.7561	35.5264	44.4689	38.5447	47.8006	41.034	40.041	38.1269	40.0602	33.5463	26.0506	19.3217	27.5957	22.0536	22.0666	20.6176	31.0692	41.0323	29.9485	39.4008	30.7694	32.9523	20.3974	19.8325	18.3903	12.9544	12.465	13.3518	6.96	17.073	21.7927	19.8952	20.4503	16.495	17.287	17.6735	16.6355	19.4131	20.7604	19.6027	19.0784	15.159	21.2165
604	36.9794	35.1066	34.7994	35.742	40.4594	36.7202	36.639	35.4148	44.3984	38.4439	47.7468	40.9806	39.9743	38.0413	39.9474	33.4754	25.9962	19.2769	27.449	21.9412	22.0036	20.5493	30.9598	41.0393	29.8532	39.2621	30.7057	32.8342	20.3071	19.7652	18.3318	12.863	12.4119	13.289	6.9122	16.9809	21.8033	19.8872	20.3675	16.4394	17.2521	17.6275	16.594	19.3804	20.7184	19.5645	19.0798	15.0797	21.1567
605	36.872	35.0539	34.8209	35.7049	40.3713	36.691	36.602	35.3971	44.3706	38.3706	47.7548	41.0237	39.9388	37.9613	39.8875	33.4717	25.9079	19.2302	27.3306	21.87	21.903	20.4648	30.9052	41.0465	29.7534	39.2309	30.6907	32.7264	20.2622	19.7242	18.2714	12.7784	12.3913	13.2548	6.8906	16.9037	21.8252	19.9131	20.3653	16.4454	17.2489	17.6209	16.5973	19.4079	20.7284	19.6093	19.0589	15.0648	21.0727
606	36.8908	35.0739	34.9293	35.7674	40.3113	36.7714	36.6257	35.4804	44.388	38.3776	47.8525	41.0339	39.9224	37.8972	39.8827	33.5153	25.9064	19.2437	27.3782	21.8673	21.9172	20.4769	30.9186	41.012	29.7653	39.2583	30.7582	32.7518	20.36	19.7614	18.3688	12.7923	12.4133	13.2968	6.9099	16.9089	21.8389	20.0002	20.4888	16.5408	17.313	17.6852	16.658	19.4948	20.7752	19.687	19.1121	15.1154	21.0505
607	36.9096	35.0635	34.9854	35.805	40.2619	36.8546	36.5638	35.4664	44.294	38.2768	47.8016	40.9423	39.8214	37.7858	39.7995	33.4535	25.8996	19.2489	27.4153	21.8839	21.9348	20.4909	30.8655	40.9321	29.7193	39.1204	30.7216	32.7012	20.3808	19.7642	18.3612	12.8332	12.4254	13.3348	6.9284	16.8969	21.8667	20.0693	20.5167	16.6111	17.3786	17.7016	16.7073	19.5243	20.7784	19.7208	19.1225	15.1291	21.0172
608	36.9094	35.0107	34.9833	35.7869	40.2294	36.7638	36.5219	35.397	44.2208	38.1759	47.6378	40.9209	39.7428	37.7503	39.6862	33.3419	25.9322	19.2681	27.4315	21.8574	21.9514	20.4643	30.8162	40.8931	29.6749	38.961	30.6582	32.6672	20.4029	19.7332	18.3212	12.8274	12.4006	13.3307	6.9135	16.8843	21.9082	20.1193	20.5254	16.675	17.3861	17.6867	16.7424	19.4906	20.7583	19.7695	19.0966	15.0841	20.9599
609	36.8292	34.9775	34.8872	35.7438	40.1707	36.6583	36.4765	35.3234	44.2595	38.0806	47.4767	40.8051	39.6272	37.6487	39.5776	33.2789	25.8743	19.233	27.4021	21.7905	21.9349	20.4082	30.7624	40.8382	29.6379	38.8415	30.5879	32.5788	20.3726	19.7375	18.2536	12.7832	12.3753	13.3121	6.9021	16.8879	21.8646	20.1029	20.4934	16.6559	17.3571	17.6492	16.7246	19.4231	20.7469	19.8006	19.0544	15.0377	20.9123
610	36.7453	34.9252	34.7549	35.6445	40.1096	36.5363	36.4266	35.2216	44.1976	37.9504	47.3966	40.6156	39.5038	37.5073	39.4898	33.2427	25.8104	19.1042	27.3631	21.7245	21.8148	20.3748	30.6557	40.7491	29.5649	38.7498	30.4629	32.4529	20.2891	19.7791	18.1958	12.7748	12.363	13.2661	6.8827	16.8279	21.8395	20.0407	20.4485	16.5973	17.2865	17.6045	16.7313	19.3519	20.7754	19.7752	19.0294	14.9968	20.8166
611	36.7231	34.8947	34.7028	35.6079	40.0322	36.4212	36.2865	35.1968	44.1327	37.8257	47.2615	40.5088	39.3916	37.3915	39.3639	33.1381	25.719	18.9912	27.371	21.6271	21.7313	20.3263	30.5531	40.6676	29.4897	38.694	30.4034	32.3271	20.1798	19.7017	18.1561	12.723	12.2973	13.2168	6.8438	16.76	21.8625	20.0916	20.4077	16.5936	17.2397	17.5928	16.7	19.2565	20.7518	19.7599	19.0569	14.9681	20.7641
612	36.6841	34.8651	34.6718	35.6654	39.9603	36.3756	36.2359	35.1811	44.2319	37.8363	47.2236	40.4981	39.4159	37.4054	39.3539	33.0979	25.7245	18.9862	27.3695	21.574	21.73	20.3328	30.608	40.6919	29.4461	38.7751	30.5011	32.3278	20.1855	19.715	18.2104	12.7666	12.33	13.2999	6.8838	16.7558	21.9184	20.1899	20.4416	16.6369	17.3097	17.6624	16.7404	19.275	20.813	19.8589	19.1349	15.0071	20.8104
613	36.6522	34.8428	34.7219	35.6938	39.9044	36.3518	36.2226	35.1627	44.2821	37.8194	47.2629	40.4792	39.4574	37.357	39.2937	33.1368	25.742	19.003	27.3956	21.5767	21.7162	20.3214	30.6379	40.6814	29.4469	38.794	30.5366	32.347	20.207	19.7621	18.2191	12.7807	12.3072	13.3321	6.893	16.7847	21.9675	20.2231	20.4437	16.6985	17.3544	17.6955	16.8017	19.293	20.8331	19.9341	19.1629	15.0166	20.8496
614	36.6487	34.9234	34.6973	35.6806	39.9349	36.3713	36.2732	35.1379	44.266	37.8426	47.3019	40.4502	39.4472	37.3232	39.2505	33.1679	25.7834	19.0513	27.4576	21.6239	21.7457	20.3706	30.6264	40.653	29.4321	38.7291	30.5738	32.3944	20.1897	19.7432	18.2174	12.8237	12.3317	13.3936	6.9015	16.8301	22.0096	20.2802	20.4625	16.7637	17.4289	17.7335	16.881	19.3419	20.8587	20.0163	19.1592	15.021	20.905
615	36.616	34.955	34.631	35.6691	40.0246	36.3354	36.3172	35.1039	44.1642	37.8795	47.3552	40.3909	39.4303	37.3012	39.2799	33.212	25.8262	19.0553	27.472	21.6234	21.728	20.4188	30.6558	40.6548	29.5166	38.6645	30.6085	32.4094	20.1797	19.773	18.2111	12.8209	12.3611	13.4023	6.9251	16.8389	22.0973	20.3758	20.5275	16.7996	17.4555	17.7816	16.9205	19.4081	20.8767	20.0667	19.2098	15.0052	20.9341
616	36.5561	34.8773	34.6029	35.6966	40	36.2924	36.3122	35.0811	44.0613	37.8905	47.3655	40.3319	39.2943	37.3028	39.2943	33.2319	25.8523	19.032	27.4474	21.596	21.7099	20.3949	30.6627	40.6308	29.5517	38.6275	30.6104	32.4229	20.1691	19.7803	18.2683	12.7928	12.3901	13.4138	6.9199	16.8286	22.1619	20.4444	20.5981	16.8016	17.4931	17.8323	16.9719	19.4269	20.8832	20.1204	19.2333	15.0012	20.9173
617	36.5153	34.8183	34.6027	35.6635	39.94	36.2879	36.2687	35.0165	43.9843	37.8103	47.2839	40.2613	39.2208	37.2895	39.2485	33.2124	25.8277	19.0241	27.4914	21.5736	21.6912	20.3891	30.6287	40.6461	29.5245	38.6278	30.5541	32.3652	20.122	19.7692	18.2904	12.7688	12.4193	13.4181	6.9312	16.8117	22.1536	20.4494	20.6118	16.7938	17.4949	17.8473	16.9963	19.399	20.8482	20.0831	19.2329	14.9889	20.8816
618	36.4082	34.7359	34.536	35.6105	39.8801	36.2936	36.1518	34.9061	43.9763	37.7877	47.2597	40.1812	39.2418	37.2924	39.2338	33.199	25.8223	18.9849	27.5413	21.5246	21.6289	20.4176	30.6189	40.683	29.5531	38.6653	30.5508	32.4046	20.108	19.7626	18.3331	12.7298	12.4102	13.4075	6.9278	16.8105	22.1327	20.4582	20.6009	16.8027	17.4958	17.8074	16.9912	19.3805	20.8348	20.047	19.2617	14.9855	20.8792
619	36.2477	34.6425	34.4487	35.5065	39.7803	36.1954	36.0303	34.7958	43.9703	37.7473	47.2212	40.0667	39.2231	37.2809	39.1968	33.2109	25.783	18.9163	27.4694	21.4258	21.5593	20.3881	30.5822	40.6697	29.5512	38.659	30.5444	32.4499	20.1414	19.7622	18.3667	12.6894	12.4129	13.3618	6.9016	16.7554	22.0844	20.4467	20.5837	16.8112	17.4575	17.8038	17.0391	19.3217	20.8336	20.0311	19.2317	14.949	20.8689
620	36.1659	34.6495	34.3728	35.4926	39.7083	36.156	36.0559	34.7738	44.0221	37.8204	47.2896	40.1653	39.2857	37.378	39.2603	33.2656	25.7917	18.9428	27.4369	21.3962	21.545	20.4292	30.6949	40.6655	29.6431	38.7588	30.6266	32.5414	20.2099	19.8005	18.4211	12.7192	12.4301	13.4063	6.8938	16.7601	22.1467	20.4563	20.646	16.8789	17.5186	17.8731	17.1686	19.3291	20.9233	20.1365	19.282	15.0008	20.89
621	36.1585	34.6109	34.3935	35.4281	39.6919	36.2114	36.0719	34.7023	44.1274	37.8398	47.3939	40.251	39.3316	37.5079	39.2969	33.2904	25.7752	18.946	27.5277	21.4531	21.5666	20.5033	30.8434	40.6855	29.7154	38.7772	30.7197	32.6136	20.2462	19.8825	18.5242	12.7941	12.467	13.4545	6.9268	16.8099	22.2178	20.537	20.6964	16.9237	17.5884	17.8982	17.2269	19.4446	20.9936	20.2468	19.353	15.077	20.9044
622	36.1483	34.492	34.3605	35.4074	39.6114	36.2223	35.9878	34.6056	44.1679	37.788	47.3586	40.2181	39.2393	37.5273	39.298	33.2106	25.7657	18.8888	27.63	21.4168	21.5254	20.5448	30.8537	40.6948	29.7218	38.719	30.7581	32.6945	20.2751	19.9216	18.5974	12.8337	12.4884	13.4834	6.9514	16.8163	22.27	20.5822	20.7202	17.0201	17.6096	17.8949	17.2451	19.5206	21.0395	20.332	19.3898	15.1465	20.8891
623	36.0967	34.4823	34.2744	35.3984	39.5421	36.1976	35.8871	34.557	44.0792	37.6657	47.2029	40.0598	39.0965	37.4248	39.2598	33.0703	25.725	18.8591	27.7029	21.3775	21.4553	20.5545	30.7915	40.6164	29.68	38.6396	30.7261	32.6249	20.2439	19.8929	18.5383	12.8376	12.4889	13.4898	6.936	16.7724	22.2852	20.5477	20.7493	17.044	17.5596	17.8627	17.2134	19.4763	21.0198	20.3297	19.3536	15.1487	20.8307
624	35.9736	34.444	34.1811	35.3495	39.5279	36.1538	35.7448	34.5456	43.8962	37.4906	46.995	39.8861	38.9798	37.3683	39.1739	33.0001	25.6418	18.7649	27.7386	21.368	21.4365	20.5485	30.735	40.605	29.6741	38.5606	30.6702	32.5452	20.2129	19.8677	18.531	12.8082	12.4584	13.4637	6.9178	16.769	22.2569	20.5405	20.7481	17.0264	17.5461	17.8383	17.1774	19.4563	20.9718	20.3349	19.3313	15.141	20.7985
625	35.8187	34.3987	34.107	35.2816	39.5322	36.0348	35.6341	34.3933	43.803	37.319	46.883	39.8084	38.9432	37.3393	39.1522	32.9775	25.5912	18.6747	27.7489	21.2831	21.4002	20.4992	30.7377	40.5807	29.6319	38.4982	30.6611	32.5816	20.1235	19.8107	18.5176	12.7868	12.4067	13.4271	6.9153	16.7164	22.268	20.5344	20.753	17.0057	17.5363	17.8167	17.2008	19.4561	20.9979	20.3542	19.3253	15.126	20.7434
626	35.7801	34.4153	34.0982	35.3967	39.685	36.004	35.6254	34.3777	43.8469	37.3538	46.9237	39.9564	39.0042	37.4149	39.2382	33.0406	25.6221	18.7109	27.8139	21.2574	21.4445	20.5675	30.7986	40.6733	29.6583	38.5373	30.7331	32.6641	20.1761	19.8711	18.6188	12.8132	12.3952	13.4628	6.9291	16.7555	22.3235	20.5725	20.7697	17.04	17.5339	17.8744	17.2782	19.4914	21.0409	20.4188	19.3688	15.1606	20.806
627	35.7354	34.4417	34.113	35.4803	39.7637	36.006	35.6167	34.3935	43.956	37.3761	46.9323	40.0572	38.9614	37.4044	39.209	33.0524	25.6389	18.7206	27.8122	21.2834	21.4423	20.5605	30.8169	40.6066	29.6267	38.5155	30.7578	32.6852	20.2084	19.9394	18.6395	12.8308	12.4073	13.4978	6.9294	16.7743	22.3783	20.5813	20.78	17.0574	17.5095	17.8858	17.2837	19.4976	21.0384	20.4349	19.3404	15.1758	20.8514
628	35.7146	34.4169	34.0276	35.5211	39.8284	36.0188	35.55	34.3873	43.9307	37.3141	46.8371	40.0231	38.887	37.3012	39.169	32.9824	25.6236	18.7168	27.8258	21.2934	21.4303	20.5166	30.7542	40.5411	29.593	38.4251	30.6809	32.6149	20.161	19.9657	18.6384	12.8231	12.4538	13.515	6.9447	16.8153	22.4264	20.5955	20.7907	17.0621	17.504	17.8795	17.3043	19.4369	20.9957	20.4462	19.3162	15.1353	20.8482
629	35.7297	34.324	33.994	35.5243	39.8026	36.0172	35.5169	34.3897	43.9633	37.255	46.8779	39.9819	38.828	37.2154	39.1336	33.0064	25.5693	18.7179	27.709	21.3002	21.339	20.5282	30.7698	40.5468	29.5993	38.3559	30.6339	32.6097	20.1519	20.0015	18.676	12.8379	12.449	13.522	6.9171	16.8281	22.4455	20.59	20.8321	17.0718	17.5342	17.8961	17.3828	19.4349	20.9955	20.4649	19.3366	15.1163	20.8119
630	35.6454	34.2481	33.9236	35.4548	39.7175	35.8758	35.4018	34.2824	44.0358	37.249	46.9232	39.9108	38.8568	37.2492	39.1414	33.0836	25.4853	18.6395	27.6131	21.2684	21.2541	20.5234	30.7951	40.5748	29.554	38.3543	30.6824	32.5798	20.1913	19.9839	18.7236	12.8705	12.4358	13.5386	6.8957	16.8089	22.4474	20.5391	20.8295	17.0611	17.5694	17.9041	17.4019	19.3881	20.9855	20.505	19.3341	15.1443	20.8094
631	35.5067	34.2274	33.8738	35.3849	39.7074	35.8555	35.2684	34.198	44.1068	37.2878	46.9495	39.8597	38.9651	37.3537	39.1546	33.1574	25.4203	18.5907	27.6045	21.247	21.2218	20.4976	30.7862	40.6823	29.5857	38.429	30.7536	32.5797	20.1687	20.0169	18.7253	12.9121	12.4319	13.5799	6.9326	16.8311	22.4367	20.5578	20.8563	17.0724	17.593	17.9615	17.4402	19.3744	20.9562	20.554	19.3083	15.1489	20.7909
632	35.4336	34.1512	33.7899	35.3837	39.6904	35.8171	35.1786	34.1325	44.0922	37.2541	46.8721	39.7747	39.0047	37.3187	39.1379	33.1067	25.3633	18.5482	27.5862	21.249	21.2336	20.4822	30.8006	40.6605	29.564	38.3608	30.7187	32.5729	20.125	20.0542	18.7364	12.8925	12.4422	13.577	6.9561	16.8436	22.43	20.554	20.9165	17.0741	17.5982	18.0206	17.4343	19.3872	20.9248	20.5634	19.3478	15.1527	20.7916
633	35.3818	34.1206	33.7288	35.4194	39.6814	35.7808	35.1179	34.1404	44.0946	37.2167	46.8609	39.7186	38.9772	37.2128	39.1032	33.0719	25.3315	18.5178	27.5752	21.2179	21.1853	20.5002	30.8059	40.572	29.5345	38.3169	30.682	32.5712	20.0966	20.0505	18.8003	12.8432	12.4295	13.5716	6.9386	16.7941	22.4838	20.5681	20.9403	17.1242	17.6431	18.0639	17.517	19.4417	20.9351	20.5855	19.3911	15.1972	20.8457
634	35.3033	34.0294	33.7767	35.4443	39.6359	35.6952	35.1053	34.1554	44.2	37.1516	46.8845	39.7197	38.9053	37.2186	39.1792	33.053	25.3155	18.4477	27.5977	21.2227	21.2026	20.5449	30.7828	40.5851	29.5736	38.3733	30.7076	32.6637	20.1677	20.0866	18.8756	12.8452	12.4367	13.587	6.9159	16.8032	22.5578	20.6085	20.9794	17.1515	17.6633	18.0887	17.5899	19.4681	20.992	20.5869	19.4058	15.2433	20.8654
635	35.2873	34.0058	33.8318	35.4828	39.6088	35.7019	35.0716	34.1803	44.224	37.1324	46.8181	39.749	38.8034	37.2098	39.144	33.0047	25.2557	18.4182	27.6532	21.2121	21.1718	20.6086	30.798	40.5731	29.6193	38.3882	30.7505	32.7294	20.2112	20.1637	18.9145	12.8418	12.4301	13.5712	6.8972	16.7911	22.5393	20.6208	21.0358	17.2115	17.6608	18.0588	17.6122	19.466	20.9998	20.6299	19.4148	15.2622	20.8913
636	35.3467	34.0547	33.8853	35.5795	39.6846	35.7421	35.001	34.2659	44.2307	37.1269	46.8313	39.8021	38.819	37.2291	39.1625	33.0478	25.2252	18.4579	27.7081	21.2158	21.1887	20.7213	30.8172	40.6132	29.6826	38.4528	30.8316	32.7696	20.2317	20.241	19.0214	12.8582	12.5311	13.6681	6.9743	16.802	22.5909	20.6514	21.0903	17.2458	17.6488	18.0987	17.6877	19.4963	21.0782	20.7065	19.4846	15.3018	20.9704
637	35.3328	34.1038	33.8891	35.6173	39.698	35.721	34.9916	34.2843	44.2351	37.1345	46.8774	39.8236	38.8486	37.2386	39.2119	33.0787	25.2019	18.4636	27.7154	21.2356	21.2008	20.8034	30.8794	40.6973	29.7084	38.4791	30.8583	32.8276	20.2441	20.3017	19.054	12.9338	12.5808	13.7368	7.0157	16.9032	22.6547	20.6273	21.164	17.3116	17.7043	18.183	17.7452	19.5118	21.1441	20.7499	19.5343	15.3301	21.0139
638	35.2332	34.0743	33.8571	35.6534	39.5616	35.5922	34.9345	34.2707	44.1711	37.1614	46.7972	39.768	38.7614	37.2217	39.1471	33.0478	25.1687	18.4369	27.6465	21.1929	21.2216	20.8044	30.8311	40.6579	29.6164	38.3838	30.8091	32.7955	20.2398	20.2853	19.0719	12.9603	12.5621	13.6993	6.9892	16.8687	22.7445	20.5824	21.1782	17.336	17.8136	18.1897	17.7422	19.5236	21.1711	20.7764	19.5329	15.3938	20.9959
639	35.2033	34.0303	33.8786	35.7024	39.5923	35.5284	34.9218	34.2938	44.1496	37.1879	46.7962	39.7549	38.7644	37.2689	39.1545	33.0891	25.1472	18.4312	27.5678	21.1937	21.2314	20.8146	30.7779	40.7137	29.6458	38.3948	30.8387	32.9188	20.2251	20.3126	19.1597	12.969	12.6069	13.7322	6.9746	16.885	22.8691	20.5409	21.1845	17.3365	17.8815	18.2112	17.7952	19.5658	21.1927	20.7517	19.503	15.4207	21.0164
640	35.1247	33.9511	33.8213	35.6502	39.5029	35.4125	34.797	34.2316	44.0571	37.2114	46.8215	39.7039	38.7635	37.2764	39.1322	33.1783	25.0805	18.4025	27.4775	21.157	21.1999	20.8516	30.7938	40.7119	29.6979	38.3447	30.8975	32.9219	20.2447	20.415	19.2459	12.9451	12.5903	13.7439	6.9705	16.863	22.928	20.5902	21.2699	17.3861	17.909	18.2203	17.8775	19.6612	21.198	20.7303	19.5141	15.4418	20.997
641	35.1697	33.9667	33.8593	35.7056	39.4698	35.3887	34.7344	34.2457	44.0641	37.241	46.87	39.6627	38.7948	37.2948	39.1874	33.2608	25.0836	18.4651	27.4856	21.1592	21.22	20.8784	30.7744	40.7147	29.7446	38.2838	30.9545	32.9461	20.2819	20.5055	19.3508	12.9456	12.6113	13.7531	7.0184	16.8606	22.9976	20.6661	21.3902	17.462	18.0067	18.3021	17.9977	19.7086	21.2602	20.7906	19.559	15.5014	21.0561
642	35.1275	34.0395	33.8871	35.6885	39.4609	35.3796	34.683	34.2571	44.0436	37.2738	46.8203	39.6888	38.8167	37.3306	39.1973	33.2636	25.0175	18.4667	27.4668	21.1742	21.2062	20.8674	30.7239	40.6809	29.7306	38.3291	30.9852	32.9619	20.3037	20.5137	19.3913	12.9517	12.6137	13.7965	7.0564	16.8552	23.0558	20.7061	21.4741	17.5106	18.0134	18.3703	18.0275	19.7172	21.2736	20.8677	19.565	15.5248	21.0985
643	35.1076	34.019	33.8361	35.6526	39.4206	35.3356	34.6208	34.1741	44.0744	37.2286	46.8238	39.6915	38.8773	37.3802	39.2243	33.3021	24.9833	18.4783	27.4829	21.1413	21.1794	20.9285	30.712	40.6979	29.6983	38.3524	31.0087	33.0406	20.3481	20.5477	19.4333	13.0169	12.6353	13.852	7.095	16.8622	22.9966	20.6628	21.5421	17.556	18.0148	18.4555	18.0646	19.7791	21.3228	20.9908	19.5266	15.5847	21.1611
644	35.1521	34.0707	33.8545	35.6318	39.4368	35.3982	34.688	34.1474	44.1688	37.3781	46.8673	39.7256	38.9763	37.5204	39.2936	33.5408	25.0131	18.5441	27.4786	21.1596	21.2123	21.0328	30.8268	40.8579	29.7279	38.4308	31.125	33.1913	20.4185	20.6536	19.5336	13.0811	12.6765	13.9136	7.1104	16.8558	23.0009	20.7171	21.6186	17.6389	18.0616	18.5436	18.1647	19.9416	21.4188	21.0964	19.5904	15.6665	21.2854
645	35.1353	34.074	33.8075	35.603	39.3822	35.4074	34.6462	34.1479	44.1894	37.4523	46.8714	39.7054	38.99	37.4996	39.308	33.6015	24.9538	18.5187	27.444	21.2273	21.267	21.0799	30.8943	40.9483	29.7231	38.5262	31.1503	33.2595	20.4794	20.7869	19.6758	13.0952	12.6764	13.9006	7.1132	16.8875	23.1107	20.7419	21.6967	17.7309	18.1695	18.5309	18.2818	20.0514	21.5461	21.1326	19.642	15.7559	21.3991
646	34.9832	34.0363	33.8363	35.639	39.342	35.337	34.5584	34.1635	44.2313	37.4866	46.8718	39.675	38.9505	37.4283	39.2636	33.5137	24.8747	18.4653	27.4219	21.2024	21.2405	21.1036	30.8494	40.971	29.7118	38.5425	31.1253	33.2694	20.4544	20.7789	19.7575	13.1231	12.6629	13.9026	7.1083	16.8827	23.1124	20.7262	21.7741	17.8036	18.256	18.5061	18.2904	20.0226	21.5232	21.0685	19.691	15.7773	21.4012
647	34.847	33.9255	33.8633	35.6619	39.2666	35.2407	34.4419	34.1221	44.2066	37.4088	46.7432	39.5919	38.8575	37.3431	39.181	33.4264	24.7866	18.395	27.3636	21.0924	21.1478	21.0366	30.7137	40.8936	29.6577	38.4522	31.1304	33.18	20.3826	20.7052	19.7522	13.0814	12.6407	13.8406	7.0425	16.8911	23.0326	20.6815	21.7294	17.7304	18.2371	18.4944	18.2916	19.9463	21.4274	21.0616	19.6865	15.7267	21.3816
648	34.8713	33.791	33.7973	35.5897	39.2335	35.1091	34.3875	34.0983	44.257	37.2806	46.6007	39.4222	38.7489	37.2796	39.0825	33.3469	24.8415	18.3578	27.2848	21.1009	21.1311	20.9639	30.6207	40.7988	29.5808	38.419	31.1287	33.1234	20.3196	20.6838	19.6933	13.0466	12.6762	13.813	7.0507	16.8758	23.0289	20.5542	21.6541	17.7662	18.1609	18.448	18.2931	19.9057	21.3886	21.0717	19.6499	15.653	21.3057
649	34.8061	33.7128	33.7535	35.4966	39.1858	35.0885	34.4081	34.0863	44.2512	37.2643	46.528	39.2886	38.6918	37.2384	39.001	33.2342	24.8275	18.3908	27.213	21.0785	21.1188	20.9217	30.5985	40.7838	29.484	38.3411	31.0358	33.1485	20.3148	20.7081	19.6396	13.065	12.7041	13.8589	7.0614	16.8849	23.1275	20.5017	21.5845	17.7687	18.1147	18.4047	18.2213	19.848	21.4019	21.0036	19.6269	15.598	21.2973
650	34.7498	33.6883	33.8234	35.5415	39.1223	35.023	34.3838	34.0156	44.0699	37.0871	46.3683	39.1787	38.599	37.167	38.86	33.1275	24.7304	18.3537	27.1586	21.0111	21.1515	20.8665	30.5606	40.6252	29.3388	38.1157	30.9876	32.8947	20.2531	20.6644	19.6087	13.0771	12.706	13.8747	7.0893	16.8459	23.1833	20.4773	21.5892	17.7684	18.0427	18.3725	18.1936	19.7759	21.3632	20.8734	19.5332	15.5585	21.2269
651	34.7547	33.6317	33.8947	35.5493	39.1083	34.986	34.4268	34.0187	43.9462	37.0197	46.2857	39.2143	38.6186	37.1436	38.8495	33.1017	24.6585	18.3121	27.1169	20.9912	21.156	20.8659	30.5528	40.5872	29.2667	38.0552	30.9861	32.7715	20.2069	20.6022	19.5607	13.0558	12.6622	13.8353	7.0923	16.8943	23.2188	20.4304	21.6133	17.7295	17.9305	18.416	18.1956	19.7599	21.3777	20.8599	19.4827	15.5706	21.1911
652	34.8497	33.5426	33.9097	35.5021	39.1671	35.0065	34.481	34.0097	43.9156	37.0556	46.217	39.2988	38.7036	37.1476	38.871	33.1201	24.6117	18.3681	27.1106	21.013	21.1866	20.8997	30.5689	40.6677	29.2763	38.0915	30.9693	32.911	20.2486	20.6257	19.5532	13.0235	12.7273	13.9006	7.1345	16.9408	23.2548	20.3663	21.606	17.6668	17.9662	18.3557	18.2531	19.8025	21.4194	20.8864	19.4747	15.6386	21.1886
653	34.7963	33.5584	33.8236	35.4883	39.2501	34.9507	34.4963	33.9502	43.9861	37.0819	46.1883	39.3855	38.8935	37.3059	38.9559	33.1745	24.6207	18.4232	27.1349	21.0402	21.2242	21.0208	30.6903	40.8449	29.3885	38.2225	31.0976	33.0897	20.3526	20.7184	19.6552	13.02	12.8343	13.9866	7.2095	16.9852	23.3685	20.4354	21.643	17.707	18.0511	18.4655	18.3348	19.8629	21.4909	20.966	19.5794	15.7838	21.2077
654	34.777	33.5405	33.7544	35.41	39.3597	34.7988	34.5043	33.9049	44.0239	37.0843	46.069	39.4322	38.8985	37.2947	39.0215	33.2385	24.5113	18.4244	27.073	21.0207	21.2574	21.1002	30.7563	40.8346	29.4407	38.3414	31.1781	33.1009	20.3211	20.7819	19.7252	13.0771	12.839	13.9556	7.2012	17.0169	23.3064	20.4135	21.7201	17.7041	18.0519	18.4784	18.3894	19.9228	21.5097	21.0185	19.6323	15.8222	21.2585
655	34.7402	33.5233	33.6326	35.2758	39.4011	34.7507	34.4217	33.8742	44.0846	37.0774	46.1126	39.4483	38.9082	37.2709	39.0475	33.301	24.4745	18.4393	26.9986	20.9666	21.2321	21.1663	30.8165	40.8653	29.5209	38.2879	31.276	33.0971	20.4027	20.8685	19.8525	13.0609	12.8217	13.8374	7.1605	17.0289	23.3219	20.3669	21.7911	17.7671	18.0679	18.4805	18.5112	19.9414	21.5668	21.0302	19.6916	15.9022	21.355
656	34.8656	33.6221	33.6899	35.255	39.4442	34.7932	34.4984	33.9084	44.0723	37.0577	46.1808	39.3918	38.9679	37.2051	39.0377	33.2025	24.5941	18.5402	27.0643	21.0337	21.3195	21.1652	30.8383	40.8384	29.4647	38.1893	31.3232	33.1762	20.4434	20.8843	19.8869	13.1558	12.9536	13.9108	7.2155	17.0823	23.3283	20.3686	21.7876	17.784	18.0743	18.4796	18.5472	19.8977	21.5551	20.9894	19.7336	15.9244	21.3462
657	34.8551	33.71	33.7133	35.1568	39.5122	34.8214	34.4675	33.852	44.0347	37.0535	46.2086	39.3491	38.9141	37.1797	39.006	33.162	24.5794	18.5361	27.0037	21.0488	21.3071	21.2077	30.8212	40.82	29.3967	38.2067	31.3342	33.1669	20.4351	20.9565	19.9495	13.1914	13.0216	14.0143	7.2729	17.1296	23.3341	20.4763	21.9017	17.9303	18.1733	18.5698	18.6602	19.9282	21.6398	21.0798	19.8288	15.9692	21.4174
658	34.7956	33.7305	33.6915	35.1168	39.5314	34.8455	34.4169	33.8693	44.1183	37.061	46.2439	39.467	38.9782	37.2942	39.1555	33.2204	24.4346	18.4878	27.0396	21.0077	21.2687	21.3284	30.9701	40.8678	29.4651	38.2918	31.47	33.207	20.5777	21.0428	20.0997	13.2333	13.0062	14.0684	7.2843	17.1036	23.3445	20.6072	22.1492	18.0041	18.298	18.7179	18.8101	20.0513	21.7578	21.2168	19.952	16.0932	21.4992
659	34.8103	33.7075	33.682	35.1121	39.5945	34.7795	34.3624	33.8379	44.0983	37.0891	46.2229	39.4543	39.0349	37.2441	39.1512	33.264	24.4337	18.5109	27.0779	20.9385	21.3052	21.3651	30.9612	40.9259	29.46	38.2425	31.5029	33.2253	20.6563	21.1174	20.0941	13.2555	13.0356	14.0966	7.3595	17.1065	23.3533	20.6098	22.1798	18.0151	18.3165	18.7271	18.8894	20.0562	21.8103	21.2756	19.9597	16.1225	21.5042
660	34.831	33.7041	33.7144	35.0182	39.5486	34.6072	34.354	33.7388	44.0164	36.9413	46.12	39.3827	39.0273	37.0498	39.0857	33.1971	24.3606	18.4324	27.0954	20.9229	21.3561	21.336	30.9214	40.8868	29.3633	38.123	31.4657	33.1185	20.6214	21.0843	20.0208	13.2538	12.9824	14.0098	7.3353	17.0819	23.3015	20.531	22.1624	17.9813	18.3584	18.7373	18.9209	20.0819	21.8895	21.2401	19.8978	16.1905	21.4844
661	34.86	33.5987	33.6203	34.8841	39.5133	34.5268	34.1982	33.5887	43.8228	36.7636	45.9545	39.3974	38.9595	37.0955	39.0468	33.1348	24.3029	18.351	27.1276	20.8348	21.2579	21.2945	30.8693	40.8306	29.2988	37.9948	31.3432	33.0257	20.5986	21.0192	19.9674	13.2116	12.8865	13.9706	7.2548	16.9984	23.295	20.4738	22.148	17.9468	18.3586	18.7074	18.8875	20.1512	21.8287	21.2135	19.8087	16.2071	21.4408
662	34.9065	33.5894	33.6455	34.831	39.5793	34.5738	34.0906	33.5833	43.812	36.7413	45.9566	39.4199	38.9795	37.1908	39.1371	33.1815	24.2788	18.3731	27.1749	20.8545	21.2906	21.4102	30.9014	40.9111	29.3276	37.9888	31.3291	33.0169	20.6183	21.0823	20.0272	13.2495	12.9385	13.9849	7.2176	17.0264	23.3731	20.5427	22.1869	18.0408	18.3871	18.7511	18.882	20.2306	21.826	21.2216	19.8373	16.2112	21.4563
663	34.9285	33.66	33.7294	34.9307	39.647	34.7037	34.0717	33.6859	43.8899	36.8067	46.0095	39.3361	39.0049	37.2521	39.1295	33.1881	24.3686	18.6285	27.2066	20.9696	21.4586	21.418	30.9006	40.9726	29.3515	37.9545	31.3703	33.0378	20.6077	21.1827	20.1162	13.2547	13.0595	14.1134	7.3415	17.0917	23.6204	20.529	22.1953	18.0176	18.431	18.8188	18.9671	20.2948	21.8835	21.2556	19.9493	16.2348	21.5177
664	34.9121	33.7352	33.8093	35.0436	39.7025	34.6176	34.081	33.7994	44.0265	36.8526	46.1719	39.4034	39.0068	37.2945	39.0656	33.2923	24.3866	18.7671	27.2729	21.0271	21.5333	21.519	30.9328	41.0366	29.4583	37.9805	31.4552	33.1217	20.6488	21.3081	20.252	13.3468	13.2024	14.2163	7.4319	17.1766	23.8614	20.6235	22.312	18.097	18.4826	18.8513	18.9855	20.4164	21.9584	21.3589	20.0492	16.3612	21.7067
665	34.846	33.8187	33.7963	35.1091	39.7029	34.5354	34.0555	33.7049	43.9081	36.8693	46.1447	39.3687	38.9546	37.2087	39.0529	33.2015	24.4185	18.7628	27.3348	21.0288	21.5537	21.5771	30.9635	41.1043	29.5069	37.9266	31.44	33.1416	20.6871	21.3137	20.2908	13.409	13.2531	14.1823	7.4767	17.1846	23.9443	20.567	22.3203	18.063	18.4279	18.8641	19.0424	20.4057	21.9216	21.4125	20.0245	16.4024	21.7167
666	34.741	33.7855	33.7688	35.0771	39.7372	34.6201	33.9545	33.6606	43.7911	36.8849	46.0835	39.4296	38.9621	37.1843	39.0304	33.2243	24.3738	18.7678	27.3852	20.9394	21.5215	21.6019	30.9771	41.1616	29.5229	37.9014	31.5524	33.0746	20.7358	21.3142	20.2911	13.3898	13.2285	14.1623	7.4406	17.1688	23.9509	20.6142	22.2285	18.0292	18.4235	18.8042	19.0563	20.3936	21.9191	21.4175	20.0208	16.3786	21.7157
667	34.5455	33.5425	33.6263	34.9112	39.7257	34.5642	33.75	33.5868	43.8264	36.8797	46.0786	39.3224	38.9594	37.234	39.0603	33.2801	24.1533	18.6933	27.2452	20.8929	21.3689	21.5501	31.0215	41.1426	29.5182	37.9237	31.6669	33.1192	20.7476	21.3045	20.2952	13.2691	13.1645	14.0828	7.3108	17.1071	24.0209	20.6406	22.2387	18.0514	18.4565	18.8256	19.0972	20.3868	21.9886	21.423	20.1064	16.3942	21.7168
668	34.3953	33.3874	33.5922	34.8314	39.7066	34.509	33.6461	33.5536	43.9762	36.8878	46.0606	39.2449	38.9815	37.2725	39.1614	33.2362	24.0674	18.6281	27.2777	20.9142	21.3243	21.4915	31.098	41.1438	29.5211	37.9119	31.7051	33.2056	20.7469	21.3162	20.3068	13.2875	13.1613	14.0735	7.3	17.0855	24.0252	20.6905	22.3182	18.076	18.4982	18.8751	19.1065	20.4126	22.0678	21.4708	20.0859	16.4742	21.7862
669	34.5558	33.3942	33.6449	34.9222	39.7554	34.5523	33.6664	33.5332	44.1307	36.9491	46.1336	39.2803	39.0335	37.3142	39.273	33.199	24.1251	18.5871	27.448	20.9494	21.3972	21.5848	31.1906	41.1794	29.5753	38.0129	31.7586	33.2173	20.8143	21.4334	20.4497	13.3651	13.2576	14.131	7.3908	17.0893	23.9446	20.7581	22.4954	18.1414	18.5229	18.9623	19.1741	20.5619	22.1807	21.5749	20.1089	16.5405	21.8665
670	34.5679	33.4632	33.6357	34.996	39.6876	34.5004	33.5549	33.6038	44.1434	37.0538	46.2213	39.2445	38.9286	37.2905	39.2713	33.1804	24.0718	18.6031	27.5057	20.9281	21.3665	21.61	31.1697	41.3011	29.6253	38.0277	31.7222	33.2148	20.9137	21.4413	20.6016	13.3699	13.3184	14.0931	7.4266	17.0264	23.9136	20.7807	22.6681	18.2152	18.5483	19.0267	19.2922	20.6274	22.2714	21.6271	20.2016	16.6066	21.9129
671	34.4042	33.4296	33.5947	34.9074	39.5649	34.5006	33.4876	33.6237	43.9244	36.973	46.2006	39.0598	38.8323	37.2862	39.118	33.0832	23.9782	18.6649	27.5095	20.9092	21.328	21.7054	31.0394	41.2952	29.6179	38.0028	31.692	33.1557	20.9966	21.4346	20.6259	13.323	13.3282	14.0588	7.3771	17.0045	23.846	20.8138	22.6475	18.2094	18.5532	19.0748	19.3496	20.6531	22.2789	21.6773	20.2177	16.675	21.8978
672	34.3629	33.3781	33.6059	34.9137	39.5645	34.5418	33.6144	33.6475	43.7247	36.8909	46.0315	38.8828	38.6917	37.2024	38.9329	32.9838	23.9509	18.7599	27.5803	20.8895	21.4294	21.6152	30.9915	41.1663	29.4798	37.8209	31.567	33.0697	20.9299	21.3811	20.6052	13.3028	13.3285	14.0719	7.4155	17.0252	23.75	20.7515	22.5568	18.1477	18.4602	18.954	19.2601	20.6301	22.236	21.6744	20.1635	16.6563	21.8381
673	34.292	33.4561	33.5964	34.9101	39.6841	34.598	33.6228	33.687	43.5782	36.9086	46.0451	38.7927	38.5997	37.1386	38.9638	32.8772	23.9671	18.8946	27.6625	20.9667	21.4992	21.5313	30.9881	41.1181	29.3777	37.7356	31.4859	32.9674	20.8507	21.3178	20.5184	13.3192	13.3985	14.0861	7.4357	17.1112	23.7624	20.6635	22.4822	18.1084	18.4233	18.9457	19.1877	20.5856	22.1487	21.5828	20.0989	16.5494	21.8323
674	34.2462	33.4048	33.6052	34.8841	39.6905	34.6102	33.5088	33.7037	43.6111	36.9601	46.0442	38.8624	38.4908	37.1744	39.0772	32.9603	23.9541	18.9873	27.704	20.8816	21.5198	21.6444	31.024	41.1678	29.4926	37.7178	31.5393	33.0379	20.9248	21.3973	20.553	13.3706	13.4454	14.2008	7.4184	17.1548	23.9279	20.7587	22.5955	18.2171	18.4899	19.1057	19.2141	20.699	22.2374	21.6841	20.1961	16.6576	21.9018
675	34.234	33.4918	33.6187	34.9465	39.5182	34.6277	33.4394	33.7629	43.5451	37.0585	45.971	38.8604	38.5226	37.034	39.0395	32.9373	23.9236	19.0527	27.6739	20.9163	21.5755	21.7138	30.9802	41.1233	29.5749	37.6456	31.5019	33.0154	20.981	21.3836	20.5841	13.4245	13.4787	14.2612	7.4783	17.1806	24.1134	20.8038	22.676	18.3564	18.492	19.1301	19.3535	20.7777	22.254	21.7811	20.2284	16.8251	21.982
676	34.1624	33.5177	33.7007	34.9653	39.5434	34.6361	33.4162	33.8178	43.3964	37.0978	45.9167	38.8464	38.4996	36.995	39.0169	32.9475	23.8855	19.0721	27.6304	20.9517	21.649	21.6868	30.9372	41.0082	29.514	37.6248	31.4273	33.0118	20.9376	21.3919	20.5672	13.5049	13.4437	14.3431	7.4645	17.1765	24.2225	20.753	22.6816	18.4026	18.5287	19.1238	19.4679	20.8499	22.2074	21.7407	20.1596	16.8208	21.9817
677	34.1834	33.4802	33.69	34.8167	39.5577	34.5934	33.4273	33.8007	43.3936	37.1051	45.9383	38.7785	38.4696	37.045	38.9445	32.9392	23.7831	19.0125	27.5641	20.9611	21.6078	21.6286	30.9184	41.0151	29.4372	37.6123	31.383	33.0769	20.865	21.3816	20.5975	13.4691	13.3647	14.2597	7.4813	17.1867	24.3048	20.7495	22.7471	18.3307	18.4775	19.0706	19.4723	20.8776	22.2112	21.7102	20.0818	16.7466	21.954
678	34.1738	33.4014	33.7348	34.6948	39.4716	34.5186	33.346	33.7466	43.3864	37.1286	46.0163	38.7182	38.4085	36.9527	38.866	32.9437	23.7314	18.9545	27.4322	20.8928	21.5273	21.6379	30.9805	40.9962	29.4995	37.6367	31.3528	33.113	20.9364	21.3575	20.6482	13.458	13.3528	14.2109	7.468	17.0661	24.3949	20.7393	22.7131	18.3331	18.5196	19.0404	19.4602	20.8634	22.1816	21.7796	20.0735	16.747	21.9705
679	34.2049	33.3753	33.7223	34.7727	39.4129	34.5264	33.328	33.8056	43.5389	37.2323	46.1692	38.8006	38.4479	37.0829	38.9492	33.0577	23.7077	19.0818	27.4357	20.8695	21.5323	21.6455	31.1787	41.158	29.5892	37.6996	31.4821	33.2481	21.1334	21.4117	20.8262	13.4777	13.3867	14.3074	7.5325	17.0464	24.5123	20.8047	22.7635	18.4047	18.5989	19.0946	19.6122	20.9865	22.3138	21.8889	20.1637	16.8921	22.0692
680	34.2255	33.3693	33.8116	34.885	39.4517	34.6563	33.4993	33.8093	43.4811	37.2896	46.2145	38.7997	38.466	37.174	38.9629	33.1332	23.7266	19.2291	27.4691	20.9521	21.6453	21.6703	31.267	41.3352	29.6076	37.6968	31.5692	33.2487	21.1285	21.5696	20.8175	13.4933	13.4943	14.3658	7.5754	17.1304	24.485	20.8493	22.7362	18.374	18.628	19.0903	19.6717	20.9991	22.3833	21.9143	20.216	16.9482	22.1549
681	34.2156	33.386	33.778	34.9045	39.4254	34.6187	33.5029	33.8387	43.4631	37.4316	46.2785	38.6873	38.532	37.2276	39.1365	33.1626	23.7621	19.2862	27.6178	20.9438	21.6664	21.7802	31.3708	41.4909	29.7231	37.7594	31.5538	33.275	21.2226	21.6912	20.8708	13.5077	13.5795	14.3935	7.6366	17.1793	24.4394	20.8677	22.7629	18.3517	18.6713	19.1386	19.749	20.9836	22.453	22.0277	20.2562	16.986	22.244
682	34.1909	33.4104	33.7827	34.9239	39.3542	34.4449	33.424	33.7833	43.4943	37.3938	46.2859	38.6249	38.611	37.1963	39.1768	33.1106	23.788	19.2635	27.6457	20.8808	21.6633	21.8016	31.4255	41.5594	29.7851	37.7714	31.5609	33.2522	21.2943	21.6883	20.9674	13.5182	13.5442	14.3254	7.582	17.1788	24.456	20.9535	22.8873	18.4404	18.7925	19.2117	19.7556	21.0957	22.5991	22.1497	20.3482	17.1329	22.3136
683	34.2369	33.4605	33.879	34.9851	39.3326	34.3548	33.3879	33.7593	43.5839	37.3592	46.3725	38.8019	38.7588	37.3001	39.2234	33.2055	23.8214	19.2962	27.6378	20.9404	21.7385	21.9168	31.5075	41.6618	29.8982	37.8625	31.5762	33.3233	21.4556	21.7863	21.1002	13.6184	13.622	14.331	7.6384	17.2059	24.4955	21.1822	23.0745	18.5686	18.8982	19.3291	19.8603	21.3161	22.7403	22.2877	20.5393	17.3021	22.3817
684	34.2674	33.5615	33.9928	35.0996	39.3067	34.327	33.4642	33.8326	43.5736	37.3412	46.3193	38.7533	38.8016	37.3513	39.2183	33.2214	23.8496	19.4086	27.5902	21.0412	21.8025	21.9511	31.5553	41.5669	29.8816	37.8652	31.6076	33.3647	21.5524	21.872	21.1758	13.6339	13.6574	14.4447	7.6927	17.1884	24.5022	21.2543	23.1777	18.6586	18.9534	19.436	19.9991	21.5246	22.6885	22.3498	20.6072	17.3318	22.4133
685	34.3578	33.5831	34.1064	35.1801	39.3929	34.3856	33.3758	33.7169	43.7929	37.4529	46.3162	38.7842	38.8984	37.3306	39.2838	33.2916	23.8298	19.519	27.6288	21.1162	21.9565	22.0317	31.656	41.5158	29.9073	37.8849	31.673	33.3884	21.5321	21.9316	21.22	13.7517	13.7195	14.5894	7.8076	17.29	24.5623	21.2905	23.1785	18.7617	19.0099	19.5686	20.1354	21.6753	22.7212	22.3813	20.6817	17.4591	22.5058
686	34.3948	33.5257	34.1075	35.1611	39.3391	34.4007	33.2633	33.6581	43.7806	37.4325	46.2759	38.7906	38.9275	37.3145	39.2471	33.2967	23.7548	19.5134	27.6304	21.0568	21.9798	22.1332	31.7059	41.5581	29.9386	37.9118	31.7576	33.3455	21.5462	21.9678	21.2867	13.7353	13.7561	14.5437	7.7426	17.2449	24.6467	21.344	23.2059	18.8024	19.0296	19.5962	20.1334	21.6809	22.7543	22.3563	20.7655	17.4925	22.5181
687	34.4898	33.5814	34.019	35.2114	39.2127	34.4257	33.2511	33.6472	43.6628	37.3162	46.2753	38.7569	38.8536	37.2107	39.1424	33.2626	23.7318	19.4818	27.6646	21.0374	21.9935	22.2045	31.6314	41.5482	29.9795	37.9193	31.7203	33.3526	21.5455	21.9246	21.2882	13.7338	13.8044	14.5282	7.6755	17.2102	24.6824	21.3681	23.2362	18.8135	19.0392	19.5586	20.1362	21.7152	22.7758	22.377	20.7847	17.5105	22.4731
688	34.5948	33.5911	33.9705	35.2682	39.1583	34.4369	33.3067	33.6858	43.6135	37.1878	46.189	38.7031	38.7013	37.0698	39.0439	33.2986	23.7388	19.5569	27.6874	21.1214	22.0319	22.1362	31.5767	41.4897	29.947	37.8178	31.5842	33.3589	21.5426	21.8481	21.1899	13.7747	13.8644	14.5971	7.7602	17.2443	24.7048	21.3517	23.1715	18.7834	18.9517	19.5374	20.2128	21.7594	22.7278	22.451	20.7514	17.5582	22.3991
689	34.5745	33.525	33.9474	35.2737	39.2279	34.4439	33.197	33.6442	43.5596	37.1347	46.1945	38.7239	38.5883	37.0704	39.0207	33.2697	23.7079	19.5984	27.6981	21.1137	21.9847	22.1621	31.6085	41.4719	29.9275	37.7821	31.5164	33.3622	21.5662	21.8924	21.2074	13.7756	13.9105	14.6367	7.7879	17.2397	24.9005	21.4119	23.1665	18.7922	19.0375	19.6244	20.2545	21.8099	22.727	22.4303	20.7979	17.6722	22.3394
690	34.6619	33.5702	34.0606	35.3183	39.2689	34.4439	33.1959	33.6484	43.425	36.9534	46.1132	38.6624	38.5464	36.9737	38.9095	33.1767	23.7112	19.6089	27.7422	21.1808	22.0461	22.1341	31.6218	41.3587	29.8515	37.6955	31.4511	33.3439	21.5317	21.849	21.2369	13.8972	13.998	14.7046	7.8397	17.3475	25.1202	21.4052	23.1222	18.778	19.0246	19.6458	20.2362	21.8124	22.8012	22.364	20.7696	17.6717	22.3953
691	34.7398	33.7275	34.1711	35.3884	39.2243	34.4612	33.257	33.6989	43.4113	36.8809	46.0482	38.6697	38.5069	36.9123	38.9171	33.3175	23.8239	19.6989	27.7913	21.2294	22.112	22.1701	31.6117	41.3112	29.9427	37.7604	31.4547	33.3113	21.5796	21.8424	21.3654	13.9802	14.0368	14.7695	7.8627	17.4945	25.3296	21.4939	23.1931	18.8083	19.0674	19.6659	20.2394	21.7965	22.7884	22.4628	20.8274	17.6888	22.5144
692	34.7672	33.6967	34.1356	35.2629	39.1938	34.3957	33.2568	33.7154	43.4532	36.8645	45.9705	38.5531	38.4879	36.8962	38.9984	33.3966	23.7128	19.7433	27.7172	21.2404	22.0411	22.1236	31.5388	41.2489	29.9678	37.8556	31.4136	33.2668	21.6484	21.8558	21.3951	14.0139	14.0209	14.809	7.8519	17.5495	25.3204	21.5	23.2551	18.8025	19.0269	19.6627	20.2629	21.8255	22.8135	22.4534	20.8804	17.7838	22.5355
693	34.8358	33.7719	34.2422	35.21	39.1538	34.3698	33.3884	33.8198	43.5223	36.7657	46.1161	38.548	38.6445	36.9354	39.1093	33.4264	23.7329	19.7847	27.7706	21.2539	22.0126	22.2615	31.6041	41.4159	30.0368	37.966	31.6014	33.41	21.7925	21.9546	21.4559	13.9522	13.9873	14.7872	7.8707	17.6585	25.3766	21.5667	23.3328	18.8627	19.0855	19.733	20.3197	21.9556	22.8975	22.545	21.005	17.9701	22.5893
694	34.9108	33.7931	34.3162	35.2339	39.1422	34.3999	33.3867	33.7823	43.6788	36.7901	46.2984	38.6461	38.7961	37.0601	39.181	33.4822	23.8182	19.7683	27.8029	21.2018	21.9885	22.3493	31.79	41.5505	30.1537	38.0376	31.6963	33.5452	21.8846	22.0276	21.535	13.9686	13.958	14.6947	7.7842	17.5958	25.4254	21.6567	23.3528	18.898	19.1236	19.893	20.3354	22.1064	22.8783	22.6203	21.0988	18.0867	22.5758
695	34.9027	33.8532	34.4236	35.3261	39.1853	34.4473	33.4319	33.8448	43.7158	36.916	46.3658	38.6493	38.7852	37.1163	39.1903	33.5064	23.832	19.8232	27.9563	21.2532	22.1108	22.4004	31.8225	41.6684	30.1388	38.1357	31.7078	33.627	21.8403	22.0926	21.5653	14.0225	14.0433	14.7866	7.8936	17.5669	25.4201	21.6732	23.2988	18.7777	19.1045	19.8595	20.346	22.1533	22.8787	22.6923	21.141	18.0741	22.6252
696	34.7986	33.8758	34.4114	35.415	39.177	34.357	33.4474	33.818	43.6632	36.9103	46.3413	38.6689	38.8067	37.1398	39.1696	33.5694	23.766	19.8338	28.018	21.3047	22.0851	22.3852	31.8202	41.719	30.1869	38.2189	31.7338	33.6176	21.7948	22.1489	21.5356	14.0576	14.1092	14.8464	8.0477	17.6681	25.2886	21.6138	23.2641	18.7223	19.1417	19.8532	20.3585	22.1899	22.9036	22.8071	21.104	18.0748	22.6273
697	34.7135	33.8174	34.3396	35.3676	39.0927	34.2835	33.4148	33.7951	43.6792	36.8256	46.5329	38.7341	38.9372	37.1368	39.2536	33.6742	23.699	19.8496	27.8655	21.1548	21.9349	22.3364	31.8592	41.7339	30.2231	38.2747	31.8158	33.6855	21.9266	22.1995	21.5917	14.108	14.1665	14.8763	8.0492	17.7013	25.219	21.6198	23.3166	18.7534	19.1746	19.8081	20.4443	22.2557	22.9306	22.9311	21.1275	18.1834	22.6457
698	34.7064	33.6239	34.1607	35.2526	38.8885	34.241	33.2551	33.7978	43.6267	36.8089	46.6849	38.7334	38.9116	37.1097	39.3668	33.7287	23.5963	19.8091	27.701	21.0263	21.8492	22.3342	31.7907	41.7978	30.2364	38.344	31.8506	33.6413	22.006	22.2917	21.6935	14.1056	14.2167	14.8467	7.9936	17.6416	25.2298	21.6135	23.3853	18.7716	19.0922	19.8341	20.4964	22.2964	22.9139	22.9064	21.2339	18.2756	22.6527
699	34.6693	33.4703	34.1865	35.2594	38.8829	34.1977	33.2007	33.6702	43.5246	36.8033	46.6967	38.7097	38.8802	37.0654	39.4199	33.6992	23.5838	19.6945	27.7674	20.9253	21.814	22.4101	31.8412	41.788	30.2513	38.3914	31.7629	33.6211	22.009	22.3563	21.7471	14.0392	14.1515	14.78	7.9769	17.544	25.2456	21.6052	23.4395	18.7926	19.1661	19.8687	20.5615	22.292	22.8765	22.8938	21.2139	18.2424	22.7051
700	34.6494	33.5243	34.2082	35.1679	38.825	34.2073	33.1944	33.5534	43.3882	36.776	46.5919	38.5332	38.8249	37.0043	39.3647	33.6038	23.481	19.7209	27.7677	20.9379	21.7842	22.4685	31.8532	41.713	30.1743	38.4232	31.7718	33.6051	21.9969	22.3537	21.7425	14.1651	14.2127	14.8399	8.0279	17.536	25.2784	21.612	23.3798	18.7722	19.1571	19.8122	20.6002	22.3204	22.8523	22.8924	21.255	18.214	22.7632
701	34.6419	33.5668	34.2772	35.0946	38.9341	34.1927	33.2414	33.7397	43.1907	36.677	46.5288	38.546	38.7533	36.9891	39.309	33.371	23.5495	19.6632	27.7305	20.9725	21.7789	22.4579	31.8205	41.7159	30.2261	38.3277	31.7076	33.6842	22.037	22.2473	21.6858	14.216	14.1752	14.9255	8.0305	17.5381	25.2922	21.6039	23.3858	18.7251	19.2819	19.8654	20.7062	22.3449	22.8681	22.833	21.2344	18.2534	22.7415
702	34.7396	33.5398	34.3137	35.0239	38.8525	34.2002	33.3938	33.9241	43.22	36.7555	46.5382	38.5985	38.8299	37.0567	39.2522	33.533	23.6209	19.6247	27.8243	20.9713	21.697	22.5511	31.8348	41.8293	30.3276	38.3943	31.8127	33.8094	22.1513	22.356	21.7664	14.2451	14.2365	15.0485	8.0263	17.6133	25.5581	21.7474	23.5028	18.8491	19.2929	19.9454	20.8017	22.4176	23.0082	22.9784	21.297	18.4062	22.8245
703	34.7906	33.5276	34.2992	35.0461	38.782	34.176	33.3422	33.8005	43.184	36.9042	46.5079	38.551	38.9521	37.1049	39.3093	33.6005	23.6313	19.6604	27.7729	20.9389	21.6965	22.6135	31.9585	41.9891	30.3923	38.389	31.9219	33.878	22.2019	22.492	21.7646	14.2537	14.2793	15.0057	8.1159	17.6341	25.665	21.8091	23.5587	18.8343	19.2756	19.9338	20.8104	22.426	22.9842	23.0202	21.3864	18.487	22.9357
704	34.7062	33.5365	34.27	35.0758	38.7966	34.1659	33.365	33.721	43.212	36.9803	46.4126	38.5664	38.9789	37.1608	39.5118	33.5697	23.6412	19.7029	27.8025	20.9725	21.6833	22.6777	31.9965	42.0277	30.4644	38.3157	32.0269	33.8282	22.2218	22.4864	21.8299	14.2469	14.2187	14.9921	8.0608	17.5714	25.6595	21.7449	23.579	18.8579	19.2819	19.8927	20.8087	22.4772	22.9771	23.0478	21.4263	18.5271	22.9413
705	34.7458	33.5459	34.2266	35.2037	38.7949	34.2689	33.4835	33.7389	43.1522	36.9611	46.3888	38.5941	38.8846	37.1496	39.5759	33.5058	23.688	19.8286	27.9532	21.0406	21.7474	22.7652	31.8865	41.927	30.497	38.2482	31.9582	33.8082	22.3158	22.5404	21.941	14.3582	14.2869	14.9926	8.1565	17.6944	25.6911	21.7927	23.6395	18.8644	19.2305	19.9001	20.9038	22.5064	23.0374	23.0496	21.4992	18.548	22.8988
706	34.6938	33.4584	34.0923	35.1227	38.7066	34.274	33.398	33.6594	43.1976	36.9946	46.4408	38.6396	38.8483	37.1759	39.5383	33.5131	23.6379	19.8198	27.8697	21.0735	21.7441	22.8354	31.8438	41.928	30.4732	38.3229	31.9606	33.8146	22.4496	22.5459	22.0464	14.3023	14.3358	15.0678	8.22	17.7986	25.738	21.8506	23.6252	18.803	19.2385	19.9275	20.9291	22.5656	23.0801	23.1425	21.4967	18.5968	22.888
707	34.5872	33.4163	33.9942	34.9222	38.6501	34.1719	33.352	33.521	43.2508	37.1052	46.4323	38.5689	38.8824	37.1159	39.4666	33.5474	23.4895	19.6651	27.7883	20.9671	21.5362	22.7627	31.8689	41.9847	30.4308	38.2473	31.9152	33.7416	22.4204	22.5244	21.9436	14.1996	14.3018	15.0569	8.1872	17.6446	25.7235	21.8426	23.5503	18.721	19.3563	19.9105	20.9175	22.6159	23.1707	23.1945	21.5599	18.5688	22.8568
708	34.7351	33.5789	33.9449	35.0083	38.6556	34.2215	33.4817	33.6747	43.3822	37.2869	46.4648	38.7587	39.1726	37.2259	39.7046	33.7803	23.5585	19.776	27.899	21.0496	21.664	23.0146	32.0038	42.0711	30.6717	38.3921	32.168	33.9351	22.5871	22.7727	22.2426	14.3214	14.4729	15.1296	8.358	17.6271	25.8611	21.9909	23.7872	18.9176	19.4297	20.071	21.1231	22.9138	23.1989	23.2419	21.7634	18.8116	23.0454
709	34.7626	33.7766	34.1057	35.1331	38.7931	34.2972	33.6378	33.8314	43.286	37.3194	46.381	38.7409	39.2266	37.3781	39.7494	33.7897	23.7926	20.0058	28.0949	21.1618	21.8678	23.0648	31.9012	42.026	30.6932	38.4653	32.2628	34.062	22.6132	22.868	22.3724	14.5786	14.6026	15.2072	8.5309	17.8587	25.9361	22.0671	23.8025	19.0413	19.4433	20.1724	21.2105	23.0385	23.1567	23.3168	21.8333	18.8766	23.0199
710	34.6624	33.8152	34.1235	35.1875	38.7747	34.2682	33.7923	33.9185	43.2817	37.3419	46.4373	38.9156	39.3741	37.5194	39.8974	33.9852	24.0127	20.0528	28.0739	21.2188	21.9321	23.1494	31.9912	42.0886	30.6918	38.6217	32.3381	34.276	22.7649	22.8582	22.4359	14.7115	14.6643	15.3001	8.5752	18.0219	26.1024	22.2226	23.7684	19.2158	19.5586	20.3352	21.3155	23.0398	23.258	23.366	21.8233	18.9319	23.2
711	34.6835	33.9528	33.9979	35.112	38.7807	34.2445	33.9244	33.8784	43.251	37.3634	46.4452	38.8997	39.4016	37.6953	40.1155	34.1089	24.0108	19.9792	27.9679	21.2185	21.883	23.1489	32.0659	42.159	30.8212	38.6503	32.3603	34.3623	22.9438	23.0669	22.5706	14.7791	14.6693	15.4038	8.5319	18.0539	26.2391	22.3165	23.8581	19.2879	19.6646	20.4185	21.3966	23.1591	23.4084	23.4118	21.9542	19.1342	23.3568
712	34.6733	33.8478	33.9651	34.9905	38.6871	34.3312	33.9174	33.7902	43.3583	37.6013	46.5095	38.9528	39.5069	37.9198	40.3253	34.2064	24.0329	19.9242	27.9815	21.3063	21.8369	23.3043	32.1949	42.4119	31.0761	38.817	32.457	34.4725	23.1339	23.2018	22.743	14.7193	14.74	15.446	8.5414	18.0207	26.2044	22.3703	23.992	19.3724	19.7822	20.5643	21.6374	23.2573	23.5666	23.604	22.1834	19.302	23.4876
713	34.7777	33.8465	34.1003	34.9713	38.8981	34.2881	33.9673	34.0147	43.3005	37.554	46.4882	38.9062	39.6183	37.9909	40.2479	34.3002	24.1824	20.1442	28.074	21.4185	21.9402	23.3912	32.1467	42.4415	31.2565	38.8478	32.5391	34.5522	23.2108	23.2437	22.8305	14.857	14.9385	15.6175	8.6607	18.2024	26.0879	22.4259	23.9845	19.3293	19.7963	20.681	21.6694	23.2508	23.5328	23.6031	22.2477	19.3735	23.4485
714	34.7352	33.831	34.0743	34.9376	38.9015	34.3172	34.08	34.0627	43.3393	37.6898	46.6083	39.0549	39.7937	38.2024	40.2452	34.4262	24.1656	20.1726	28.0186	21.5247	22.0042	23.5234	32.1601	42.489	31.3338	38.8366	32.6922	34.6962	23.3069	23.3153	22.9759	15.0543	14.9972	15.7437	8.7106	18.2675	26.1392	22.4922	24.1005	19.4297	19.9104	20.7425	21.7834	23.2596	23.6198	23.6682	22.4138	19.5443	23.482
715	34.7449	33.8772	34.1297	35.204	39.0057	34.2881	34.2106	34.0649	43.2723	37.7836	46.7196	39.1245	39.808	38.2419	40.2869	34.4128	24.2635	20.2048	28.0632	21.6535	22.0201	23.5751	32.1891	42.4671	31.3671	38.8892	32.6734	34.7199	23.3623	23.3604	22.982	15.2144	15.0236	15.9105	8.7736	18.5289	26.1698	22.4419	24.194	19.451	19.9278	20.7582	21.8106	23.2625	23.7017	23.783	22.3495	19.5576	23.6141
716	34.8261	33.8118	34.2429	35.3123	39.0265	34.3447	34.2637	34.0668	43.2417	37.7119	46.7003	38.9919	39.8475	38.171	40.2974	34.3916	24.4317	20.1446	28.0262	21.7843	22.0753	23.4466	32.0825	42.5375	31.3952	38.8438	32.578	34.7039	23.3801	23.4423	22.9076	15.1649	15.024	15.9245	8.8259	18.6238	26.0854	22.4445	24.116	19.377	19.8284	20.6553	21.7532	23.2232	23.695	23.7565	22.3128	19.5839	23.575
717	34.7825	33.9935	34.3903	35.3553	39.039	34.3498	34.3264	34.0779	43.1718	37.7862	46.8008	39.1146	39.8605	38.2153	40.366	34.5053	24.3162	20.132	27.8796	21.8676	22.0993	23.5188	32.1682	42.5194	31.3673	38.8749	32.693	34.9054	23.418	23.6474	22.9915	15.148	15.119	15.9465	8.8338	18.4657	26.1266	22.4834	24.1747	19.4108	19.8043	20.8119	21.826	23.304	23.696	23.7554	22.5067	19.6502	23.6023
718	34.8571	34.1442	34.4889	35.4782	39.1562	34.5374	34.4497	34.1887	43.3106	38.0712	46.8761	39.3374	39.9827	38.3356	40.6404	34.8907	24.3181	20.1982	27.9165	21.8795	22.1659	23.8061	32.4274	42.5367	31.429	39.0408	32.874	35.1838	23.5992	23.8823	23.2083	15.3459	15.2212	16.0002	8.8491	18.5127	26.3062	22.5744	24.2643	19.4444	19.8714	20.9618	22.0262	23.602	23.7679	23.8749	22.6987	19.8415	23.6957
719	35.0088	34.2267	34.573	35.5435	39.1007	34.5164	34.5952	34.2603	43.3117	38.0214	46.8093	39.3818	39.9854	38.45	40.7824	34.9585	24.4646	20.1145	27.8833	21.8357	22.3118	23.7484	32.5066	42.3927	31.4885	39.1488	32.9427	35.2805	23.8418	23.9633	23.2521	15.425	15.4136	15.9792	8.9022	18.7131	26.471	22.7183	24.2487	19.4962	19.8899	20.9303	21.9397	23.7239	23.724	23.9062	22.7009	19.8474	23.6278
720	35.1414	34.2796	34.5837	35.5689	39.2284	34.6128	34.7666	34.2825	43.2605	38.057	46.9421	39.3514	40.115	38.5218	40.8298	35.0491	24.5783	20.1901	27.9553	21.8746	22.3699	23.7601	32.6284	42.2136	31.6593	39.2335	33.1778	35.4314	24.0268	23.9857	23.3096	15.3766	15.5589	16.0516	9.0334	18.6943	26.5287	22.8338	24.3326	19.6253	19.9603	20.9481	22.018	23.87	23.9034	23.9929	22.8189	19.9641	23.7681
721	35.1166	34.3244	34.4937	35.4724	39.2462	34.5521	34.8294	34.2241	43.2279	38.2298	46.9032	39.5473	40.2545	38.5957	40.8858	35.1408	24.6614	20.2506	28.061	21.8913	22.3884	23.9286	32.7866	42.2766	31.7989	39.3418	33.393	35.6135	24.1939	23.9844	23.3531	15.5001	15.5459	16.1974	9.0597	18.8464	26.5649	22.7969	24.3436	19.7441	20.062	21.1463	22.1296	24.0253	24.0537	24.1776	22.8937	20.1107	23.9476
722	35.1791	34.5664	34.5578	35.5794	39.2129	34.7118	35.0073	34.3348	43.0993	38.2269	46.8541	39.663	40.3171	38.6029	40.8738	35.1927	24.761	20.3413	28.2063	21.9906	22.4017	23.9183	32.8553	42.1969	31.9441	39.3346	33.471	35.5583	24.1239	24.1308	23.5003	15.6995	15.6247	16.2581	9.0906	19.0166	26.6473	22.7376	24.2605	19.6266	20.1123	21.2817	22.1696	24.0074	23.9303	24.1426	22.8667	20.1381	24.0412
723	35.3931	34.7028	34.8074	35.618	39.2758	34.9704	35.0652	34.3347	43.1448	38.3642	47.0038	39.8512	40.4311	38.7334	40.9636	35.4589	24.8426	20.3271	28.3535	22.2055	22.346	24.123	32.9742	42.2877	32.0454	39.4894	33.5733	35.5992	24.3262	24.5616	23.8298	15.874	15.8155	16.4073	9.2996	19.1984	26.6966	22.826	24.2939	19.6944	20.111	21.4244	22.398	24.0536	24.1438	24.2642	23.1246	20.2612	24.1763
724	35.4722	34.7534	34.8694	35.6703	39.3968	34.9215	35.1784	34.2694	43.2527	38.5199	47.4724	40.0736	40.7375	39.1379	41.384	35.6428	24.958	20.3025	28.1665	22.1801	22.2836	24.3159	33.1761	42.6416	32.313	39.7483	33.7215	35.7953	24.5403	24.8095	24.0683	15.9916	15.8614	16.5531	9.5014	19.0824	26.7788	23.0203	24.4476	19.8993	20.2555	21.5984	22.6096	24.2662	24.2851	24.3101	23.3378	20.5393	24.4505
725	35.5537	34.7653	34.845	35.7494	39.5196	34.9923	35.3477	34.5731	43.3826	38.7402	47.6627	40.2152	41.0731	39.3266	41.5911	35.8592	25.1326	20.3586	28.1244	22.3189	22.4057	24.5123	33.3838	42.8394	32.4025	39.9884	33.8758	36.0188	24.7513	24.8209	24.1722	16.0472	16.0173	16.7869	9.5077	19.3149	26.8614	23.2007	24.5367	19.9891	20.3709	21.7768	22.6099	24.1823	24.3577	24.5041	23.4721	20.5436	24.5952
726	35.6466	34.9968	34.9366	36.1293	39.9201	35.3141	35.5287	34.734	43.4292	38.823	47.8402	40.3871	41.3036	39.5592	41.6986	35.958	25.5201	20.5162	28.2965	22.6452	22.6616	24.6297	33.5868	42.9444	32.4743	40.0838	33.9342	36.1112	24.7698	25.0018	24.2915	16.4093	16.2042	16.9583	9.7049	19.4949	26.8393	23.2155	24.5069	19.9519	20.4697	21.6848	22.6718	24.141	24.508	24.6604	23.5888	20.7147	24.5411
727	35.7947	35.167	35.161	36.317	40.0551	35.6441	35.5763	34.8661	43.4697	38.9089	47.793	40.481	41.4364	39.85	41.7806	36.0295	25.745	20.687	28.3435	22.8021	22.8951	24.5739	33.6496	42.9453	32.5488	40.0865	34.082	36.283	24.901	25.1915	24.2977	16.6981	16.3451	17.1192	9.916	19.5667	26.9229	23.1473	24.4589	19.9628	20.4341	21.715	22.7433	24.2955	24.5409	24.615	23.6655	20.7657	24.6466
728	35.9628	35.297	35.3861	36.4496	40.2612	35.6281	35.7856	34.9147	43.6028	39.2543	47.9165	40.7309	41.6458	39.9858	42.0481	36.2474	25.7941	20.8968	28.2963	22.8642	22.9877	24.6885	33.7234	43.0438	32.7937	40.2647	34.2799	36.5947	25.1176	25.4227	24.2564	16.9796	16.4502	17.3903	10.0015	19.6714	26.9592	23.2222	24.7369	20.0699	20.4079	21.9828	22.9343	24.5561	24.6671	24.7177	23.7187	20.8239	24.8311
729	36.1844	35.4898	35.6103	36.5427	40.4934	35.778	36.005	35.2023	43.729	39.5899	48.0901	40.9708	41.8804	40.1437	42.3868	36.6688	26.0011	20.9551	28.4313	23.1124	23.1448	24.9316	33.952	43.2369	33.0393	40.57	34.5604	36.8103	25.203	25.7397	24.4124	16.982	16.6247	17.5036	10.0224	19.779	26.9609	23.3145	24.9941	20.1226	20.5501	22.1752	23.2061	24.638	24.7475	24.8272	23.9614	20.9529	24.9738
730	36.5264	35.7294	35.7498	36.5973	40.6068	36.1576	36.3075	35.5726	43.6952	39.5492	48.1948	41.2759	41.9633	40.2502	42.5757	36.7375	26.2243	21.126	28.6934	23.3233	23.2335	24.885	34.0151	43.3932	33.0857	40.653	34.5441	36.7932	25.2543	25.8606	24.5931	17.1926	16.9494	17.7303	10.2142	19.9874	26.7755	23.398	24.9754	20.0243	20.5563	22.2341	23.133	24.7104	24.7181	24.8728	24.1908	20.9336	25.0402
731	36.726	35.862	35.9488	36.7417	40.6739	36.2971	36.3844	35.5055	43.7391	39.6073	48.5283	41.305	42.1173	40.3591	42.6851	36.9956	26.4895	21.1437	28.7296	23.3613	23.2422	24.7498	34.0945	43.4451	33.1868	40.6464	34.6134	36.9499	25.2983	25.8779	24.647	17.1031	16.998	17.6894	10.2488	20.0566	26.8182	23.4791	24.9492	19.9868	20.6833	22.2283	23.1248	24.6772	24.7342	24.9226	24.2793	20.9125	25.1834
732	36.6517	35.8501	36.0797	36.7933	40.7198	36.2884	36.3396	35.5317	43.6247	39.7212	48.5889	41.1505	41.9958	40.4007	42.7242	37.0187	26.5965	21.121	28.8161	23.5063	23.3638	24.8031	34.1128	43.3643	33.2905	40.6726	34.7417	36.9964	25.5094	25.9299	24.7686	17.0842	17.0517	17.6443	10.2595	20.0594	26.7408	23.563	24.9844	19.9002	20.8418	22.1424	23.2942	24.7877	24.6792	24.9148	24.287	21.142	25.2327
733	36.6652	35.7702	36.0919	36.8592	40.7925	36.2534	36.3845	35.5629	43.3162	39.6016	48.663	41.0466	41.7265	40.2506	42.5754	36.8772	26.7309	21.0975	28.8116	23.4349	23.3555	24.8985	34.2184	43.2682	33.2764	40.5709	34.6427	36.8984	25.5062	25.8297	24.8237	17.2217	17.1959	17.6368	10.4443	20.165	26.8237	23.7009	24.9759	19.9821	20.893	22.0187	23.2196	24.7574	24.6682	24.9624	24.2203	21.1406	25.1965
734	36.69	35.8893	36.0458	36.8491	40.7879	36.1194	36.26	35.4811	43.4859	39.6131	48.7764	41.3613	41.9484	40.4724	42.6631	36.9617	26.6692	20.9996	28.7215	23.2171	23.2526	25.0833	34.5255	43.3497	33.3695	40.6844	34.7705	36.9346	25.8342	26.0834	24.9662	17.2954	17.1956	17.717	10.3675	20.1923	26.938	23.7908	25.0875	20.1628	21.0274	22.1444	23.4047	24.8765	24.9714	25.1039	24.4629	21.2334	25.3696
735	36.6545	35.9646	35.9759	36.9495	40.7965	36.13	36.0886	35.4736	43.5843	39.4366	48.6704	41.3609	41.8242	40.5422	42.566	36.8427	26.5689	20.9776	28.7077	23.23	23.1727	25.0302	34.6969	43.3554	33.3585	40.7876	34.7527	36.9674	25.8142	26.0751	24.9678	17.3316	17.1993	17.6371	10.3412	20.2031	27.0116	23.7554	25.0273	20.2694	20.95	22.1917	23.4492	24.8885	24.9003	25.1038	24.3169	21.242	25.4364
736	36.6028	36.0412	35.9768	36.9673	40.6913	36.1197	36.0548	35.4817	43.6423	39.5738	48.6568	41.3633	41.9743	40.6637	42.6799	37.0689	26.6398	20.8302	28.5888	23.2813	23.2696	25.1194	34.7628	43.5403	33.3617	40.9629	34.8161	37.0716	25.8997	26.1161	25.0973	17.3839	17.2132	17.7717	10.2764	20.2209	27.2133	23.7438	25.2105	20.294	20.9163	22.145	23.582	24.8781	24.9731	25.1004	24.5525	21.4116	25.6027
737	36.402	36.0258	35.8769	36.8721	40.4662	36.0552	36.0242	35.5654	43.6714	39.8664	48.8559	41.5851	42.2623	40.8949	42.857	37.3894	26.5014	20.8334	28.4305	23.461	23.2396	25.235	34.972	43.662	33.5599	41.129	35.0721	37.2341	25.893	26.3158	25.1099	17.4346	17.2469	17.9633	10.4087	20.1434	27.3316	23.812	25.2518	20.2387	20.9435	22.4213	23.5899	24.9555	25.0747	25.2015	24.7943	21.5484	25.8382
738	36.4761	36.1453	35.9334	37.0225	40.7202	36.3596	36.254	35.8387	43.7897	40.2275	49.0964	41.7804	42.652	41.153	43.1305	37.5624	26.466	20.9251	28.5299	23.5685	23.2229	25.3083	35.0324	43.7017	33.81	41.2056	35.3114	37.4528	25.9869	26.5111	25.1989	17.6493	17.2493	18.0826	10.5638	20.2928	27.3771	23.8215	25.366	20.4628	21.0557	22.5307	23.6843	24.9635	25.1169	25.3816	24.9654	21.8394	25.9087
739	36.501	36.1638	36.0835	36.9822	41.012	36.4575	36.2248	35.8804	44.005	40.353	49.3709	41.7691	42.7524	41.3584	43.2061	37.6781	26.4748	20.9724	28.5379	23.4839	23.2503	25.4138	35.0991	43.9172	34.0085	41.4614	35.5116	37.8097	26.0338	26.6821	25.4057	17.7102	17.2869	18.3051	10.6285	20.2626	27.3724	23.862	25.501	20.5062	21.1063	22.5439	23.7891	25.0063	25.2347	25.6328	25.1355	22.0303	25.9127
740	36.5778	36.2336	35.9402	36.9943	41.0023	36.4555	36.378	35.8635	44.0992	40.3589	49.4846	41.8391	42.7925	41.5436	43.3256	37.9881	26.5919	20.9076	28.3824	23.2582	23.3074	25.4433	35.1285	44.0888	34.0363	41.5855	35.54	37.8496	26.1794	26.7985	25.5953	17.8318	17.3342	18.3349	10.6297	20.1576	27.3683	23.9427	25.6412	20.421	21.2219	22.6008	23.9842	25.2822	25.5012	25.6065	25.243	21.9588	25.9747
741	36.4983	36.2523	35.8505	37.125	40.8118	36.5338	36.2762	35.813	44.031	40.2796	49.428	41.7473	42.5248	41.5681	43.256	37.9169	26.7972	20.972	28.4637	23.3097	23.3139	25.3301	34.9826	43.9147	33.9467	41.5062	35.497	37.8362	26.1397	26.7991	25.4515	17.8923	17.2528	18.5072	10.7112	20.3348	27.204	23.8575	25.4503	20.2301	21.2127	22.593	23.9248	25.2443	25.5796	25.4357	25.1985	21.6502	25.8106
742	36.5798	36.237	35.9269	37.2684	40.6006	36.47	36.1616	35.877	43.8808	40.0396	49.3028	41.5555	42.4167	41.5787	43.1517	37.8303	26.7588	21.0023	28.3925	23.4738	23.2831	25.276	35.0806	43.9536	33.8313	41.4223	35.3866	37.7953	26.1656	26.6866	25.409	17.7879	17.5567	18.5852	10.8534	20.4641	27.288	23.7605	25.3191	20.2673	21.1323	22.5575	23.8433	25.0312	25.5156	25.3347	25.1347	21.7037	25.8274
743	36.507	36.4821	36.056	37.2547	40.7285	36.7282	36.2596	35.7681	43.8507	40.1428	49.2077	41.7131	42.6427	41.7518	43.3306	38.2795	26.7241	21.1801	28.6969	23.948	23.2851	25.4097	35.2399	44.2692	34.0473	41.6294	35.5635	37.8318	26.1094	26.8828	25.6094	18.1725	17.9633	18.9064	11.069	20.52	27.2875	23.8335	25.3736	20.3198	21.2921	22.8868	24.0817	25.1119	25.534	25.6223	25.2188	21.9899	26.0526
744	36.6235	36.4562	36.2469	37.2245	40.9192	36.7062	36.3103	35.8751	44.1123	40.2705	49.1126	41.9525	42.9805	41.7861	43.415	38.4022	26.772	21.1441	28.663	23.9733	23.4488	25.674	35.4285	44.4082	34.1288	41.7322	35.6137	38.1292	26.3169	27.0063	25.8756	18.25	18.0008	18.9165	11.1289	20.6431	27.0452	23.9763	25.4487	20.4207	21.4117	23.1284	24.2956	25.2368	25.6927	25.7545	25.3895	22.0659	26.1413
745	36.9479	36.3052	36.1862	37.3321	40.7335	36.8027	36.2319	36.0065	44.2076	40.5284	49.1946	41.9424	43.2044	41.7044	43.5403	38.3189	26.9396	21.093	28.6544	23.8664	23.5108	25.8949	35.5582	44.2968	34.3205	41.707	35.6789	38.3243	26.3172	27.1118	25.9491	18.0026	17.9341	18.7201	11.1473	20.8121	27.0053	24.2339	25.3692	20.448	21.3851	23.0804	24.3319	25.4831	25.79	25.7162	25.4925	22.1352	26.2412
746	37.0384	36.4765	36.1493	37.5599	40.524	36.7433	36.3151	35.8449	44.1679	40.3729	48.9803	41.9159	42.9853	41.6672	43.4814	38.1396	27.0566	21.2449	28.6582	23.9758	23.747	25.8159	35.3718	44.1401	34.2244	41.6444	35.6602	38.0313	26.4161	27.0419	25.6446	18.1927	18.0925	18.9522	11.4033	20.9203	26.9435	24.0954	25.3229	20.4256	21.2814	22.8783	24.2132	25.5239	25.8529	25.4726	25.3712	21.992	26.2829
747	36.8349	36.4298	36.1426	37.819	40.428	36.6729	36.2237	35.869	44.1751	40.4343	48.968	42.0085	42.8521	41.7842	43.5097	38.3474	26.7882	21.3509	28.5917	24.1211	23.6949	25.8112	35.4321	44.3699	33.9384	41.8333	35.7867	37.9128	26.4946	26.9456	25.7387	18.3109	18.1219	18.7771	11.2446	21.0794	26.8615	24.1625	25.4675	20.5427	21.4974	23.1122	24.2121	25.6362	25.8406	25.495	25.501	21.8829	26.2867
748	36.7395	36.3844	35.9574	37.6018	40.4585	36.6939	36.0691	35.7582	44.1995	40.5935	49.3601	42.0468	43.0695	41.958	43.6648	38.461	26.7009	21.0617	28.4878	23.8036	23.3393	25.9134	35.7016	44.6752	34.0469	42.0288	36.0678	38.1246	26.486	27.3025	25.8375	18.1204	18.0573	18.6122	11.0509	20.8529	26.8036	24.1555	25.3949	20.6268	21.4657	22.9853	24.2586	25.765	25.7276	25.7853	25.6449	22.0712	26.3643
749	36.914	36.4149	35.9516	37.2622	40.6698	36.8706	36.2783	35.8348	44.4311	40.7273	49.5844	42.4588	43.4754	42.1941	43.9385	38.648	26.7487	20.9036	28.734	24.0216	23.4405	26.3218	35.8212	45.0509	34.4112	42.0589	36.3265	38.4535	26.6625	27.6861	26.2048	18.3413	18.1913	18.9915	11.2709	20.8812	26.7548	24.1405	25.3517	20.8051	21.6537	23.2492	24.4643	25.835	25.9032	25.9627	25.7134	22.2836	26.6635
750	36.9087	36.3116	35.9512	37.3253	40.7576	36.9606	36.2493	35.8358	44.5164	40.9371	49.664	42.6333	43.49	42.3857	44.0147	38.7647	26.4923	21.0139	28.7718	23.9578	23.4661	26.2646	35.8793	45.1828	34.7304	42.0283	36.5739	38.6997	26.8029	27.7723	26.3702	18.5063	18.2814	19.0258	11.3612	21.0871	26.7123	24.0831	25.3546	20.8504	21.8894	23.5661	24.7434	25.7006	26.0793	25.8788	25.9689	22.4376	26.965
[truncated: 24 more columns]
