# Supplementary material for: Molecular basis of wax-based color change and UV reflection in dragonflies
Source: eLife. 2019 Jan 15;8:e43045. doi: 10.7554/eLife.43045 (PMC6353593; doi:10.7554/eLife.43045)
Supplement: Figure 2—source data 7. [file elife-43045-fig2-data7.xlsx]

## Sheet: Oalbistylum-CRAIC
	MaleDorsal	MaleDorsal	MaleDorsal	MaleDorsal	MaleDorsal	MaleDorsal	MaleDorsal	MaleDorsal
wavelength	a	b	c	d	e	f	g	h
380	51.6702	37.2432	54.1729	54.6646	50.6499	53.5882	19.2105	18.5307
381	51.2403	36.4383	53.6515	54.2591	50.1996	53.1373	18.6773	18.0107
382	50.888	35.6954	53.1633	53.7622	49.7696	52.7525	18.1928	17.3201
383	50.2474	34.9277	52.4196	53.3008	49.332	52.2896	17.6337	16.7916
384	49.6543	34.0237	51.7424	52.6744	48.7122	51.548	16.9796	16.1924
385	49.0619	33.1042	51.1279	52.1183	48.1887	50.9462	16.3863	15.5571
386	48.7189	32.0602	50.7248	51.7258	47.8377	50.4276	15.959	14.9468
387	48.5831	31.4311	50.594	51.5302	47.6515	50.2415	15.6996	14.6
388	48.4165	31.0206	50.4264	51.3672	47.5522	50.1323	15.4717	14.3647
389	48.1782	30.5848	50.1027	51.054	47.2917	50.0016	15.2603	14.1653
390	48.0119	30.2283	49.7985	50.8962	47.1704	49.7551	15.213	14.0617
391	47.9065	29.8556	49.6002	50.8491	47.0478	49.6199	15.0855	13.7687
392	47.7554	29.4115	49.2867	50.6628	46.8586	49.5762	14.9829	13.4872
393	47.64	28.8909	49.0902	50.4806	46.751	49.4584	14.874	13.3455
394	47.5107	28.6264	49.1525	50.5231	46.698	49.4815	14.7798	13.3664
395	47.2302	28.3844	49.0896	50.3711	46.5913	49.2974	14.6399	13.2767
396	47.1929	28.167	48.947	50.1638	46.509	49.2419	14.5959	13.1613
397	46.9733	27.823	48.6651	49.941	46.2777	49.0994	14.5163	13.0227
398	46.854	27.4474	48.3825	49.7926	46.1514	49.0145	14.3399	12.8802
399	46.745	27.022	48.1372	49.6393	46.0643	48.8518	14.2292	12.6535
400	46.5249	26.7835	47.9813	49.5207	46.0027	48.756	14.1281	12.5733
401	46.3874	26.555	47.9212	49.4385	45.8976	48.6613	13.9557	12.37
402	46.2223	26.2015	47.6872	49.2992	45.6713	48.5454	13.7235	12.2408
403	46.027	25.7716	47.4308	49.0979	45.4083	48.3128	13.535	12.0241
404	45.7755	25.2824	47.0902	48.7746	45.1349	48.0987	13.4446	11.8302
405	45.4664	24.8544	46.6945	48.4507	44.8924	47.9033	13.3608	11.6671
406	45.2695	24.5486	46.4928	48.3231	44.654	47.838	13.2435	11.511
407	45.0393	24.1887	46.189	48.0522	44.3291	47.6624	12.9896	11.3327
408	44.9075	23.8796	46.015	47.915	44.1592	47.5444	12.8402	11.1391
409	44.8547	23.6552	45.8194	47.8175	44.1323	47.4573	12.7224	10.9888
410	44.7998	23.407	45.6314	47.6011	44.0726	47.3367	12.6148	10.8407
411	44.6269	23.0599	45.4305	47.5354	43.9128	47.2086	12.4951	10.7048
412	44.4451	22.7266	45.2093	47.3654	43.7749	47.0338	12.3598	10.559
413	44.2913	22.4583	45.0584	47.1922	43.63	46.9176	12.2182	10.4255
414	44.2559	22.2506	45.0354	47.1228	43.5859	46.9062	12.1212	10.319
415	44.2299	22.0561	44.9754	47.13	43.5986	46.8627	12.0695	10.2346
416	44.1671	21.8589	44.8339	47.0655	43.5352	46.8824	11.972	10.1378
417	43.9165	21.6179	44.6541	46.787	43.3812	46.7772	11.8902	10.021
418	43.729	21.3719	44.4968	46.6367	43.2298	46.6507	11.8059	9.9181
419	43.5865	21.1731	44.3927	46.5672	43.1667	46.492	11.6987	9.8183
420	43.5297	20.9701	44.3231	46.464	43.1184	46.465	11.5928	9.6983
421	43.4732	20.7654	44.2829	46.3975	43.0736	46.3959	11.5111	9.5938
422	43.4612	20.5609	44.2532	46.3549	43.0496	46.4077	11.3557	9.4612
423	43.3219	20.3569	44.1033	46.2339	42.9872	46.2523	11.2655	9.3809
424	43.1327	20.121	43.9473	46.0754	42.8238	46.0402	11.1786	9.3073
425	42.8637	19.8501	43.6859	45.8496	42.5981	45.8512	11.0192	9.156
426	42.7139	19.6133	43.325	45.5719	42.3609	45.6466	10.8801	8.9912
427	42.4573	19.3911	43.0967	45.3349	42.1569	45.3797	10.7821	8.7989
428	42.3974	19.1753	42.8997	45.2014	42.1102	45.2318	10.6386	8.6943
429	42.2657	18.9556	42.7936	45.0672	41.98	45.1269	10.536	8.6164
430	41.9599	18.743	42.567	44.9003	41.8154	44.9472	10.4065	8.5043
431	41.7361	18.4965	42.3098	44.6825	41.6648	44.8012	10.2024	8.3088
432	41.4896	18.2462	42.1305	44.4756	41.4416	44.533	10.0398	8.0934
433	41.392	18.058	41.9819	44.3073	41.3256	44.3912	9.9157	7.9925
434	41.3199	17.8723	41.7993	44.1189	41.2768	44.2981	9.8257	7.9627
435	41.2406	17.6352	41.5971	43.9576	41.1908	44.1473	9.6905	7.8506
436	41.0081	17.3935	41.4171	43.7788	41.0974	43.9122	9.5042	7.6642
437	40.7106	17.1609	41.2088	43.5316	40.9179	43.752	9.3254	7.4915
438	40.5872	17.0111	40.9668	43.3888	40.7671	43.6143	9.2698	7.3961
439	40.4515	16.7982	40.7641	43.2246	40.6631	43.4177	9.1377	7.2738
440	40.3736	16.6349	40.5957	43.0925	40.6177	43.3445	9.0581	7.1786
441	40.3622	16.5046	40.5361	43.006	40.5815	43.322	8.9896	7.1288
442	40.2035	16.3148	40.4221	42.8024	40.4612	43.1803	8.8542	7.0494
443	40.051	16.149	40.2478	42.6399	40.2982	42.9979	8.7464	6.9641
444	40.031	16.0479	40.1735	42.5926	40.2524	42.9287	8.6618	6.9216
445	40.0423	16.0158	40.1919	42.612	40.3765	42.9981	8.6383	6.905
446	40.077	15.9591	40.2315	42.6501	40.4547	43.0933	8.6515	6.9093
447	39.95	15.8065	40.0739	42.5086	40.2565	42.9651	8.5597	6.81
448	39.8329	15.6452	39.8761	42.3259	40.1393	42.7763	8.4233	6.7158
449	39.6267	15.4875	39.6875	42.1318	39.9501	42.5328	8.2998	6.6307
450	39.4902	15.371	39.5194	41.9596	39.8006	42.3883	8.2305	6.5833
451	39.4207	15.2982	39.3825	41.9507	39.7045	42.3333	8.1816	6.567
452	39.4852	15.3127	39.4939	41.9818	39.7551	42.4235	8.1759	6.5623
453	39.5879	15.2555	39.6036	42.0319	39.7933	42.4864	8.1784	6.5625
454	39.5577	15.1782	39.5506	42.1	39.7275	42.5137	8.1466	6.5419
455	39.4226	15.1277	39.3815	41.9923	39.6254	42.3727	8.0565	6.5062
456	39.3761	15.0659	39.262	41.8512	39.4941	42.2171	7.9983	6.4728
457	39.2751	15.0197	39.1195	41.7587	39.3755	42.0844	7.9562	6.4429
458	39.1422	14.9279	39.0196	41.6397	39.2877	42.0182	7.9068	6.4178
459	38.9495	14.836	38.9694	41.5212	39.2197	41.9282	7.8458	6.3622
460	38.8935	14.8029	38.8887	41.4215	39.1497	41.8281	7.7955	6.3307
461	38.8601	14.7882	38.8575	41.384	39.1447	41.7583	7.7513	6.3122
462	38.7828	14.7412	38.8276	41.2966	39.127	41.6532	7.6887	6.2915
463	38.6669	14.6909	38.7447	41.209	39.0539	41.5544	7.6809	6.301
464	38.5266	14.6232	38.6071	41.1021	38.9398	41.437	7.6436	6.2689
465	38.4476	14.5875	38.5225	41.0143	38.8626	41.3979	7.5781	6.2287
466	38.4172	14.5627	38.4265	40.9357	38.7958	41.4073	7.5629	6.1943
467	38.2656	14.5046	38.3446	40.8267	38.7415	41.3363	7.5259	6.1792
468	38.1064	14.4517	38.179	40.635	38.6294	41.1778	7.4723	6.1402
469	38.0704	14.4222	38.1282	40.5742	38.5842	41.1524	7.4235	6.1079
470	38.1014	14.4222	38.204	40.6176	38.594	41.2226	7.3831	6.0922
471	38.1091	14.404	38.2888	40.6433	38.6536	41.2643	7.362	6.0636
472	38.1712	14.3842	38.3278	40.5763	38.6869	41.2573	7.3203	6.0323
473	38.2015	14.3386	38.3274	40.5352	38.6933	41.2918	7.2751	6.0012
474	38.1837	14.3135	38.3355	40.5387	38.7044	41.3544	7.2612	5.9987
475	38.197	14.3087	38.3429	40.5761	38.7404	41.393	7.2492	5.9944
476	38.1931	14.3259	38.3507	40.5946	38.7526	41.4086	7.2245	5.9753
477	38.1724	14.3344	38.3448	40.5738	38.7646	41.4087	7.2061	5.9593
478	38.138	14.3089	38.2964	40.5293	38.7343	41.3898	7.1885	5.9412
479	37.9704	14.2136	38.0773	40.3475	38.5915	41.1844	7.1222	5.8938
480	37.6982	14.1273	37.82	40.1113	38.3769	40.9206	7.0606	5.8314
481	37.5181	14.0776	37.7015	39.9295	38.2587	40.8186	7.012	5.7851
482	37.475	14.0163	37.664	39.856	38.2358	40.8862	6.9795	5.7625
483	37.3762	13.9483	37.5647	39.7937	38.1646	40.8051	6.958	5.7401
484	37.2703	13.9218	37.4704	39.7567	38.0722	40.6864	6.9243	5.7061
485	37.2461	13.9403	37.4255	39.7547	38.1039	40.6619	6.8628	5.6697
486	37.2394	13.9162	37.3686	39.792	38.1503	40.6813	6.8255	5.66
487	37.1226	13.8398	37.2822	39.7209	38.0597	40.6299	6.809	5.6592
488	37.0187	13.8037	37.248	39.6144	37.9648	40.5824	6.7886	5.6431
489	36.9712	13.7509	37.198	39.4788	37.8589	40.4914	6.7599	5.6141
490	36.8788	13.6739	37.0704	39.3769	37.7556	40.3884	6.7128	5.5794
491	36.6681	13.553	36.7876	39.1204	37.5643	40.2219	6.6262	5.501
492	36.4119	13.4153	36.5369	38.8788	37.3207	40.025	6.5438	5.4057
493	36.322	13.351	36.4964	38.835	37.2655	39.9921	6.5114	5.3817
494	36.3591	13.3382	36.5375	38.8749	37.385	40.1139	6.4829	5.3927
495	36.3491	13.339	36.5096	38.8806	37.4535	40.1343	6.4796	5.3835
496	36.2461	13.3251	36.4441	38.8412	37.4174	40.0443	6.4621	5.3688
497	36.124	13.2288	36.3591	38.7481	37.3205	39.9229	6.4002	5.3439
498	36.0188	13.169	36.2947	38.6658	37.2994	39.8131	6.3606	5.3277
499	35.9006	13.1311	36.1634	38.5384	37.2095	39.7387	6.3288	5.2924
500	35.7567	13.0589	36.033	38.3916	37.0783	39.5702	6.2904	5.261
501	35.6609	12.9966	35.9053	38.2594	36.9313	39.3652	6.2127	5.1993
502	35.5722	12.9425	35.8303	38.134	36.826	39.211	6.1667	5.1655
503	35.4284	12.9036	35.7148	38.0415	36.7428	39.1687	6.1196	5.1168
504	35.3017	12.86	35.634	37.9653	36.6878	39.0514	6.0575	5.0743
505	35.2032	12.7778	35.5617	37.8598	36.6071	38.9384	5.9877	5.022
506	35.2054	12.7178	35.5026	37.834	36.5769	38.944	5.9594	5.0024
507	35.2402	12.6699	35.4438	37.8416	36.575	38.931	5.9463	5.0016
508	35.2207	12.6443	35.3672	37.8064	36.5677	38.8519	5.9402	4.9949
509	35.1563	12.598	35.2434	37.7154	36.4994	38.7597	5.9053	4.9686
510	35.1519	12.5658	35.1938	37.6818	36.4518	38.7292	5.8911	4.9516
511	35.1204	12.5289	35.0942	37.6674	36.4355	38.6814	5.8531	4.9222
512	35.1016	12.4877	35.0597	37.6267	36.4317	38.6709	5.8331	4.9102
513	35.1072	12.4246	35.0217	37.5881	36.4172	38.6302	5.7968	4.8671
514	35.0727	12.3758	34.9891	37.5021	36.3718	38.5653	5.7827	4.8306
515	34.982	12.333	34.9392	37.3976	36.2637	38.4534	5.7452	4.8043
516	34.9088	12.2953	34.8546	37.2698	36.1554	38.3791	5.7294	4.8009
517	34.9171	12.2869	34.809	37.2017	36.1398	38.3434	5.7244	4.782
518	34.8909	12.2357	34.7884	37.1326	36.1186	38.2944	5.7123	4.7708
519	34.8002	12.1752	34.7112	37.0304	36.0647	38.2278	5.6813	4.7447
520	34.7372	12.1327	34.7184	36.9688	35.9877	38.1642	5.6522	4.7152
521	34.7379	12.1115	34.7573	36.9633	35.995	38.0774	5.6453	4.7093
522	34.6508	12.0881	34.741	36.8853	35.9444	37.9942	5.6336	4.6979
523	34.4911	12.0603	34.6652	36.8073	35.8485	37.885	5.6078	4.6824
524	34.3322	12.0221	34.5459	36.7182	35.7098	37.7686	5.5838	4.668
525	34.2873	12.0118	34.51	36.7058	35.6554	37.701	5.5662	4.6649
526	34.2413	11.9871	34.4569	36.6407	35.6158	37.6553	5.5497	4.6687
527	34.1316	11.9184	34.3709	36.5099	35.502	37.5696	5.5192	4.6454
528	34.0074	11.8847	34.2453	36.3245	35.3245	37.4629	5.5121	4.6362
529	33.9838	11.89	34.1777	36.2456	35.3004	37.4666	5.5368	4.644
530	33.9638	11.8955	34.1147	36.2117	35.3079	37.429	5.5476	4.6406
531	33.9201	11.8952	34.0079	36.0926	35.2538	37.3719	5.5333	4.6297
532	33.831	11.9056	33.9426	35.9889	35.2079	37.2614	5.504	4.6158
533	33.7727	11.9342	33.9266	35.9356	35.1955	37.1881	5.5141	4.6219
534	33.7179	11.9485	33.8667	35.8834	35.1496	37.1283	5.5184	4.6589
535	33.6509	11.9421	33.7636	35.832	35.0615	37.102	5.5331	4.6649
536	33.62	11.9392	33.7004	35.8127	34.9979	37.0755	5.54	4.6642
537	33.6113	11.9505	33.6779	35.7881	34.9787	37.053	5.5513	4.6796
538	33.5854	11.9816	33.6686	35.8247	35.0449	37.0602	5.5408	4.6791
539	33.51	11.964	33.5886	35.7808	34.9711	37.0162	5.5155	4.6646
540	33.4348	11.9509	33.5163	35.7076	34.9115	36.8876	5.5078	4.6633
541	33.3942	11.9732	33.4256	35.6269	34.8759	36.823	5.5137	4.6757
542	33.261	11.9765	33.3199	35.5715	34.7526	36.7034	5.5303	4.663
543	33.1968	11.9941	33.3016	35.5104	34.6912	36.6391	5.5428	4.6615
544	33.2315	11.9913	33.3281	35.5073	34.6911	36.6615	5.5365	4.6502
545	33.2579	12.0288	33.4065	35.5605	34.764	36.7173	5.5382	4.6673
546	33.2441	12.0981	33.4452	35.5626	34.7953	36.7326	5.5667	4.6997
547	33.1809	12.1513	33.3882	35.4803	34.7359	36.6408	5.5793	4.7298
548	33.1186	12.1846	33.3155	35.3402	34.6508	36.551	5.5783	4.7299
549	33.0841	12.1608	33.2793	35.2593	34.5796	36.497	5.5687	4.7114
550	33.0647	12.1332	33.237	35.2473	34.5833	36.4176	5.5694	4.6819
551	33.0254	12.0723	33.2287	35.2705	34.5857	36.3913	5.5708	4.6792
552	32.9862	12.0528	33.228	35.3025	34.5622	36.3881	5.5876	4.6842
553	32.9571	12.0174	33.2144	35.2616	34.5498	36.3696	5.5889	4.7118
554	32.8936	11.9563	33.1213	35.1621	34.47	36.1823	5.576	4.6994
555	32.7394	11.9213	33.0067	35.0315	34.3285	36.0204	5.5698	4.677
556	32.666	11.9	32.9051	34.9784	34.2531	36.0151	5.5416	4.6693
557	32.5936	11.8779	32.8531	34.9494	34.2746	36.012	5.5046	4.6408
558	32.5571	11.8746	32.8474	34.9326	34.2498	35.9873	5.5088	4.6434
559	32.5261	11.8448	32.7838	34.8811	34.1777	35.9682	5.5236	4.6552
560	32.4933	11.8048	32.6608	34.8503	34.1323	35.9273	5.532	4.6576
561	32.4818	11.8095	32.6021	34.852	34.1216	35.8947	5.5459	4.6577
562	32.4445	11.8372	32.5504	34.8386	34.0422	35.7963	5.5506	4.6727
563	32.4077	11.8496	32.5127	34.8234	33.9864	35.7534	5.5316	4.674
564	32.4079	11.8172	32.4721	34.8197	34.0165	35.7662	5.5229	4.6712
565	32.4439	11.8183	32.4763	34.8537	34.0633	35.8351	5.5459	4.6812
566	32.4544	11.8483	32.4767	34.8843	34.0785	35.8797	5.5564	4.7028
567	32.4217	11.843	32.4381	34.8359	34.0964	35.8972	5.5539	4.7123
568	32.4064	11.8501	32.4479	34.7865	34.0516	35.9313	5.5639	4.724
569	32.4547	11.8818	32.5274	34.837	34.0509	35.9226	5.5811	4.7541
570	32.4864	11.903	32.4844	34.8717	34.0504	35.9047	5.6146	4.789
571	32.4591	11.9315	32.4293	34.8283	34.0128	35.8988	5.6404	4.8074
572	32.3431	11.8943	32.3823	34.7089	33.9217	35.8172	5.6232	4.794
573	32.1726	11.8744	32.2606	34.543	33.7802	35.6986	5.6113	4.7884
574	32.0559	11.8602	32.1622	34.4582	33.6689	35.594	5.6065	4.78
575	32.0958	11.9337	32.1844	34.4469	33.6931	35.5963	5.612	4.8053
576	32.1675	12.0049	32.2689	34.4979	33.8154	35.6808	5.6469	4.8297
577	32.0597	12.0042	32.2128	34.4359	33.7438	35.6188	5.6648	4.8412
578	31.863	12.0029	32.1191	34.379	33.6299	35.5193	5.6732	4.862
579	31.8435	12.0497	32.1605	34.3758	33.5955	35.532	5.7099	4.9042
580	31.8711	12.0672	32.2053	34.3568	33.5634	35.5407	5.716	4.9069
581	31.8946	12.1084	32.185	34.3983	33.5838	35.5569	5.7294	4.9278
582	31.8759	12.1138	32.1251	34.4069	33.5194	35.5342	5.7257	4.9328
583	31.8425	12.1541	32.0478	34.3823	33.4254	35.4971	5.7016	4.9143
584	31.8006	12.1596	32.0015	34.3434	33.3718	35.4456	5.7103	4.9386
585	31.7597	12.1468	31.9624	34.2747	33.3295	35.3942	5.7533	4.9895
586	31.7146	12.1568	31.9293	34.2768	33.3083	35.3395	5.775	5.016
587	31.6586	12.1767	31.8767	34.2778	33.2827	35.2824	5.7805	5.0232
588	31.6024	12.1919	31.7763	34.2104	33.2066	35.2637	5.7773	5.0161
589	31.5447	12.2605	31.7424	34.1687	33.181	35.2402	5.7723	5.022
590	31.5396	12.2993	31.743	34.1849	33.1819	35.2306	5.782	5.0454
591	31.4921	12.3008	31.736	34.1463	33.1779	35.1956	5.7925	5.0645
592	31.4231	12.2603	31.6044	33.996	33.1041	35.1458	5.7939	5.0319
593	31.3578	12.2571	31.4591	33.8652	33.0752	35.1318	5.8018	5.0214
594	31.3721	12.2804	31.4238	33.917	33.1196	35.1996	5.8311	5.0638
595	31.3593	12.2829	31.4294	33.9965	33.1151	35.1791	5.8745	5.1208
596	31.3345	12.3012	31.4337	33.9972	33.0774	35.1235	5.8721	5.1422
597	31.321	12.3236	31.4061	33.9539	33.0433	34.9987	5.8807	5.1659
598	31.2922	12.338	31.3684	33.8728	33.013	34.8917	5.8897	5.1849
599	31.242	12.3167	31.2992	33.7016	32.9277	34.8578	5.9093	5.1729
600	31.2601	12.3331	31.3802	33.6586	32.8992	34.8729	5.9473	5.1865
601	31.2779	12.3468	31.4112	33.6652	32.8925	34.8547	5.958	5.2129
602	31.2955	12.2942	31.3617	33.5751	32.9005	34.7874	5.9008	5.188
603	31.2538	12.2855	31.3329	33.5255	32.9578	34.7098	5.9284	5.1927
604	31.1039	12.2805	31.2451	33.4306	32.8887	34.5668	5.9052	5.1781
605	30.9571	12.2645	31.0927	33.2707	32.688	34.3706	5.8798	5.175
606	30.8825	12.2501	31.026	33.1577	32.6072	34.335	5.8957	5.1804
607	30.8875	12.1948	30.974	33.0587	32.5554	34.3428	5.9054	5.1776
608	30.8524	12.1204	30.8978	32.9907	32.4034	34.2309	5.878	5.1427
609	30.8399	12.1286	30.9149	32.9888	32.3508	34.2527	5.8781	5.1664
610	30.9159	12.1718	30.9343	33.0322	32.4064	34.3241	5.9039	5.2065
611	30.9077	12.2084	30.8775	33.0006	32.3893	34.2256	5.9275	5.1999
612	30.856	12.2368	30.8244	32.917	32.3849	34.1442	5.9374	5.2048
613	30.8804	12.2628	30.8328	32.9852	32.4721	34.1636	5.9842	5.2522
614	30.8678	12.2996	30.8767	33.0425	32.5206	34.1792	5.9867	5.2843
615	30.8285	12.3203	30.8934	33.0018	32.5059	34.1101	5.993	5.3043
616	30.8268	12.3019	30.8487	32.9043	32.4853	34.0733	5.9923	5.2922
617	30.7219	12.3133	30.7657	32.8065	32.3988	34.03	5.9824	5.2771
618	30.5701	12.267	30.6638	32.6332	32.2725	33.8846	5.98	5.2741
619	30.5168	12.2293	30.61	32.5679	32.1934	33.8375	5.9603	5.2833
620	30.4489	12.213	30.5739	32.5247	32.1046	33.7863	5.9577	5.2772
621	30.4002	12.2532	30.615	32.5885	32.107	33.8099	6.0144	5.3381
622	30.4096	12.2964	30.5951	32.6879	32.1857	33.9644	6.0744	5.4082
623	30.371	12.3011	30.5004	32.6677	32.1129	33.9808	6.1102	5.4001
624	30.3804	12.3275	30.4757	32.7042	32.0634	34.0537	6.1044	5.3832
625	30.3942	12.3795	30.5157	32.753	32.0822	34.0593	6.134	5.4087
626	30.341	12.3768	30.5024	32.7328	32.0012	34.036	6.1653	5.4308
627	30.3133	12.3682	30.4709	32.7524	31.9419	33.9932	6.1556	5.4463
628	30.2449	12.3679	30.4032	32.7503	31.8581	33.9306	6.1615	5.444
629	30.2044	12.3946	30.4743	32.7241	31.8252	33.8968	6.1692	5.492
630	30.3148	12.5225	30.69	32.8804	31.9274	34.0561	6.2001	5.5163
631	30.4295	12.5903	30.7988	32.9805	32.0179	34.1023	6.2528	5.5539
632	30.5238	12.6237	30.8361	33.0052	32.0812	34.1405	6.293	5.5873
633	30.4876	12.6707	30.8505	32.9923	32.0606	34.1456	6.3308	5.6106
634	30.46	12.75	30.8217	32.9523	32.0446	34.1557	6.3507	5.6415
635	30.4747	12.8026	30.836	33.0313	32.033	34.2252	6.3596	5.6496
636	30.5302	12.8224	30.8116	33.0302	31.9667	34.2147	6.4282	5.7051
637	30.5576	12.8815	30.858	33.0438	31.949	34.2604	6.4765	5.7406
638	30.6117	12.9193	30.875	32.965	31.9517	34.2764	6.4767	5.7355
639	30.5471	12.9708	30.8224	32.8798	31.9366	34.2141	6.5011	5.7658
640	30.5535	13.1011	30.8759	32.9306	32.0046	34.2882	6.5817	5.8573
641	30.4334	13.0935	30.8316	32.8381	31.9106	34.1359	6.6399	5.8973
642	30.4236	13.1133	30.827	32.7563	31.8848	34.0659	6.6626	5.8879
643	30.4175	13.1857	30.8402	32.8223	31.9689	34.0636	6.6829	5.9081
644	30.4941	13.2336	30.8404	32.8198	32.0072	34.1469	6.6963	5.9489
645	30.5267	13.2673	30.8781	32.8155	32.0783	34.2268	6.7575	5.9917
646	30.427	13.2918	30.7521	32.7183	31.9371	34.0904	6.7825	5.9927
647	30.4284	13.3324	30.6463	32.6994	31.8962	34.0135	6.7443	6.0196
648	30.3921	13.3742	30.603	32.744	31.8351	34.023	6.7545	6.0403
649	30.4374	13.3615	30.6671	32.7416	31.8987	34.0905	6.8329	6.068
650	30.4008	13.364	30.7703	32.6484	31.963	34.1806	6.8825	6.1393
651	30.2556	13.3485	30.7785	32.5634	31.8754	34.1191	6.8499	6.1565
652	30.4048	13.4006	30.9448	32.6996	31.9001	34.2157	6.9166	6.1948
653	30.4848	13.5088	31.0608	32.8614	31.9678	34.3667	7.0432	6.2942
654	30.5473	13.6021	31.0554	32.8903	32.0254	34.425	7.0729	6.3611
655	30.5577	13.6322	31.0159	32.8642	31.9882	34.4025	7.1001	6.3485
656	30.4507	13.5794	30.942	32.7347	31.9134	34.3517	7.0738	6.3039
657	30.4165	13.5786	31.0465	32.7722	31.9598	34.3711	7.1495	6.3886
658	30.3805	13.6185	30.9827	32.6843	31.9152	34.3379	7.1764	6.479
659	30.432	13.672	30.9876	32.6609	31.9371	34.3974	7.241	6.5585
660	30.3896	13.682	30.9185	32.6054	31.9047	34.3345	7.251	6.5541
661	30.2885	13.6814	30.9138	32.5234	31.8157	34.2252	7.2845	6.4799
662	30.2795	13.7291	30.854	32.4839	31.8105	34.131	7.3492	6.5295
663	30.3201	13.7983	30.8979	32.5468	31.9657	34.0675	7.4278	6.6263
664	30.4196	13.8867	30.98	32.5768	32.0627	34.0912	7.5155	6.7372
665	30.5548	14.0034	31.1369	32.7446	32.1196	34.1634	7.613	6.8164
666	30.6076	14.0152	31.1591	32.8035	32.1752	34.1899	7.6213	6.8719
667	30.5423	13.9637	31.084	32.7809	32.2043	34.0682	7.6203	6.8417
668	30.5131	13.9574	30.9587	32.7257	32.1092	34.013	7.5953	6.8149
669	30.5568	14.0783	30.9215	32.6663	31.9685	34.0119	7.6653	6.838
670	30.4639	14.0881	30.9333	32.4845	31.8967	34.0135	7.6953	6.8516
671	30.4611	14.0864	30.9235	32.4354	31.9326	34.0219	7.724	6.8808
672	30.6094	14.1329	30.966	32.5286	32.0454	34.0627	7.8216	6.9282
673	30.6544	14.2128	31.0088	32.4931	32.0247	34.0712	7.7759	6.9487
674	30.7459	14.3486	31.0333	32.5717	32.0928	34.1987	7.8145	7.0655
675	30.6468	14.3467	31.0318	32.6426	32.008	34.1676	7.8117	7.0397
676	30.6634	14.3436	31.0764	32.7274	32.012	34.1954	7.8736	7.0267
677	30.6356	14.4068	31.1265	32.7485	31.9409	34.2249	7.8962	6.9941
678	30.6735	14.3639	31.1773	32.7114	31.8486	34.1653	7.9566	6.9988
679	30.6593	14.4566	31.2855	32.6574	31.8521	34.2221	8.0106	7.0585
680	30.6881	14.5845	31.3929	32.7786	31.8585	34.2514	8.0108	7.0866
681	30.6584	14.6259	31.3927	32.8562	31.7838	34.1082	8.0538	7.1713
682	30.5352	14.5159	31.2716	32.7115	31.662	33.9738	7.9635	7.1106
683	30.5428	14.5536	31.1909	32.6785	31.6254	33.9503	8.0653	7.1708
684	30.4288	14.5341	31.1252	32.5825	31.4682	33.9014	8.0917	7.2073
685	30.4184	14.5826	31.1759	32.4731	31.3627	33.8586	8.121	7.206
686	30.4707	14.6796	31.1734	32.5227	31.3364	33.8463	8.19	7.2201
687	30.5625	14.835	31.2481	32.681	31.4852	34.0514	8.2684	7.2526
688	30.6258	14.9285	31.2774	32.7292	31.56	34.1669	8.3318	7.3672
689	30.7695	15.0509	31.4024	32.8402	31.6749	34.2426	8.3964	7.4575
690	30.846	15.1447	31.4436	32.8655	31.7194	34.3285	8.4699	7.5739
691	30.8064	15.1983	31.4164	32.8054	31.6983	34.3127	8.495	7.6108
692	30.7999	15.3168	31.5329	32.8868	31.703	34.3842	8.5566	7.6461
693	30.8638	15.4724	31.7348	33.0923	31.7394	34.4937	8.7047	7.6877
694	30.9189	15.5089	31.8007	33.2126	31.8033	34.6721	8.696	7.7201
695	30.9475	15.4506	31.7477	33.1017	31.8777	34.6824	8.5818	7.6482
696	30.9557	15.5536	31.7011	33.1687	32.0019	34.7537	8.6661	7.6695
697	30.8586	15.6045	31.6571	33.1875	31.8939	34.6595	8.7152	7.7513
698	30.9039	15.6863	31.6457	33.2051	31.7973	34.6068	8.7647	7.8438
699	31.0932	15.9243	31.9091	33.4009	31.9956	34.8575	8.9427	8.0181
700	31.1625	16.042	32.0244	33.5163	32.1777	34.9026	8.959	8.1023
701	31.1736	16.1111	32.0277	33.6075	32.1743	35.0598	9.0145	8.1599
702	31.1987	16.1434	32.0524	33.7084	32.2586	34.9655	9.1571	8.2425
703	31.2113	16.2493	32.1311	33.7017	32.2254	34.9497	9.2805	8.3187
704	31.2295	16.3332	32.129	33.6442	32.2103	34.9517	9.305	8.3371
705	31.2599	16.473	32.1592	33.6628	32.3186	35.1093	9.3055	8.3787
706	31.3345	16.6646	32.2966	33.8137	32.353	35.3247	9.4959	8.5986
707	31.0697	16.66	32.3716	33.6833	32.2823	35.2819	9.5169	8.5485
708	31.1777	16.7252	32.4119	33.6684	32.396	35.2467	9.6098	8.5783
709	31.214	16.8045	32.3923	33.6314	32.4506	35.2257	9.6315	8.6534
710	31.164	16.9748	32.3918	33.6236	32.5191	35.3884	9.7596	8.8094
711	31.2463	17.097	32.4594	33.7357	32.5778	35.3861	9.8449	8.8437
712	31.3766	17.284	32.5129	33.8313	32.7044	35.518	10.1075	9.0087
713	31.4531	17.3726	32.5835	33.8712	32.8517	35.6134	10.2455	9.1737
714	31.7379	17.5542	32.6484	33.9624	32.8028	35.6926	10.2658	9.3329
715	31.817	17.7601	32.6985	33.8965	32.8034	35.6774	10.256	9.4632
716	31.8162	17.8332	32.7655	33.9935	32.8367	35.7487	10.4084	9.5734
717	31.8552	18.0034	32.936	34.1837	33.0034	35.9557	10.5929	9.7011
718	32.0689	18.1576	33.2124	34.3056	33.2174	36.2678	10.7394	9.8091
719	32.1505	18.1845	33.3288	34.3451	33.2429	36.3896	10.7065	9.8004
720	32.3108	18.4061	33.5983	34.5163	33.3716	36.5077	10.8188	10.0159
721	32.6388	18.6519	33.8765	34.8784	33.6555	36.8054	11.0792	10.2237
722	32.8594	19.0011	33.9956	35.0579	33.9015	37.0632	11.3188	10.4108
723	33.2027	19.4656	34.3539	35.1742	34.2738	37.4617	11.5614	10.6929
724	33.3591	19.8316	34.5731	35.4139	34.4776	37.593	11.7362	10.8682
725	33.478	20.0126	34.8659	35.7812	34.7525	37.9162	12.0416	11.1128
726	33.6397	20.1434	34.9627	35.924	34.8241	38.1238	12.1273	11.1016
727	33.6967	20.2385	34.8132	35.9094	34.7712	38.0739	12.0799	11.0915
728	33.8254	20.4233	35.0877	36.0999	34.8082	38.1493	12.3357	11.3687
729	34.0574	20.7631	35.5461	36.4268	35.0589	38.276	12.4599	11.6554
730	34.4035	20.919	35.7031	36.7461	35.3456	38.3889	12.5895	11.8906
731	34.3335	20.8371	35.7002	36.6906	35.2869	38.2287	12.682	11.8292
732	34.348	20.9617	35.7399	36.6354	35.2807	38.1108	12.6196	11.8228
733	34.2991	21.0099	35.581	36.655	35.0927	37.9254	12.7022	11.7629
734	34.3965	21.1952	35.5084	36.9131	35.0226	38.0418	12.7799	11.8131
735	34.2832	21.117	35.5245	36.9168	34.96	38.0939	12.7733	11.7642
736	34.4536	21.0664	35.5722	36.9525	35.0103	38.1588	12.8244	11.8394
737	34.802	21.5063	36.0075	37.4207	35.5401	38.4539	13.0912	12.147
738	34.9358	21.6289	36.3455	37.65	35.8394	38.5848	13.17	12.35
739	35.1525	21.7008	36.4557	37.7916	35.7377	38.6995	13.2876	12.3845
740	35.4379	21.8616	36.7755	38.0494	36.0227	38.8644	13.3892	12.6083
741	35.6763	22.2048	36.9926	38.3309	36.363	39.2033	13.7263	12.9418
742	35.9393	22.576	37.2095	38.5412	36.5354	39.348	14.0233	13.0703
743	36.0787	22.916	37.4228	38.6477	36.5939	39.4601	14.3478	13.4259
744	36.0726	22.9191	37.5676	38.7122	36.7751	39.5931	14.4154	13.7122
745	35.9324	22.8692	37.6441	38.8074	36.8704	39.7864	14.5419	13.5633
746	36.0056	22.9713	37.3165	38.6692	36.5836	39.4508	14.407	13.454
747	35.9295	22.908	37.1539	38.4955	36.5196	39.2115	14.3359	13.3005
748	36.1435	22.8677	37.3083	38.4931	36.8554	39.4655	14.3335	13.3251
749	36.34	23.2602	37.6089	39.1043	37.064	39.881	14.7188	13.6983
750	36.4685	23.5504	37.8125	39.4427	37.2415	40.0964	14.942	13.8382
