# Supplementary material for: Molecular basis of wax-based color change and UV reflection in dragonflies
Source: eLife. 2019 Jan 15;8:e43045. doi: 10.7554/eLife.43045 (PMC6353593; doi:10.7554/eLife.43045)
Supplement: Figure 6—source data 1. [file elife-43045-fig6-data1.xlsx]

## Sheet: Wax-CRAIC
	Drop							Rapid					Slow					Average			Stdev
wavelength	D1	D2	D3	D4	D5	D6	D7	R1	R2	R3	R4	R5	S1	S2	S3	S4	S5	D	R	S	D	R	S
380	84.187	77.4114	83.9868	76.1086	81.2721	79.298	80.9148	45.0246	47.7912	47.1657	45.5833	46.2223	44.5615	43.3783	40.1602	50.0995	67.1621	80.4541	46.3574	49.0723	3.07609	1.12949	10.7295
381	83.9893	77.1959	83.6203	75.9641	80.8842	78.8691	80.3715	44.7005	47.4554	46.7656	45.3144	45.8465	44.2378	42.9771	39.839	49.8108	66.6216	80.1278	46.0165	48.6973	3.03472	1.10513	10.6489
382	83.7649	77.0101	83.5217	75.9511	80.8949	78.7065	80.2392	44.695	47.4728	46.4233	45.2164	45.7545	44.1258	42.8708	39.6785	49.5271	66.146	80.0126	45.9124	48.4696	3.0122	1.08251	10.5009
383	83.8401	77.032	83.8534	76.046	81.1686	78.846	80.2326	44.8461	47.5231	46.5664	45.1862	45.8109	44.3206	43.0388	39.7499	49.6487	66.0916	80.1455	45.9865	48.5699	3.0725	1.08042	10.4237
384	84.0536	77.0645	83.9677	76.1172	81.0724	78.9268	80.0501	44.7972	47.5584	46.542	45.0698	45.5357	44.4054	42.9428	39.575	49.6606	66.0133	80.1789	45.9006	48.5194	3.10773	1.14024	10.4327
385	83.8468	77.0285	83.8848	75.8926	80.7282	78.64	79.8483	44.8029	47.5716	46.4604	44.8831	45.1563	44.2363	42.7114	39.1771	49.4411	65.5809	79.9813	45.7749	48.2294	3.10887	1.20632	10.3788
386	83.6281	76.8705	83.753	75.8145	80.7505	78.5008	79.7034	44.8503	47.609	46.3231	44.7808	45.1215	44.056	42.5481	39.0476	49.1756	65.0881	79.8601	45.7369	47.9831	3.0909	1.2173	10.2324
387	83.7384	76.81	83.7903	75.7908	80.8762	78.4119	79.7901	44.8587	47.4894	46.2948	44.7186	45.0815	44.201	42.6471	39.0055	49.2255	64.9391	79.8868	45.6886	48.0036	3.14854	1.18412	10.1541
388	83.5378	76.5528	83.5656	75.6254	80.8784	78.37	79.5905	44.7902	47.4389	46.1356	44.4442	44.8721	44.1296	42.5013	38.7312	49.0958	64.6504	79.7315	45.5362	47.8217	3.14487	1.24193	10.1169
389	83.1907	76.646	83.4672	75.4944	80.727	78.2374	79.5494	44.8116	47.3009	46.0528	44.2646	44.5683	44.0416	42.5074	38.6228	48.9757	64.3012	79.616	45.3996	47.6897	3.07023	1.26161	9.99962
390	82.9303	76.4326	83.3808	75.3892	80.6415	78.02	79.5169	44.6503	47.1196	45.8103	44.106	44.4033	43.9657	42.2492	38.4951	48.8939	63.9267	79.473	45.2179	47.5061	3.07202	1.24393	9.91123
391	82.9788	76.1627	83.1964	75.2204	80.5312	77.8578	79.3453	44.4618	47.0352	45.6292	44.0461	44.2843	43.8118	42.1109	38.2845	48.7555	63.5762	79.3275	45.0913	47.3078	3.13033	1.2458	9.84132
392	82.9186	76.1599	83.187	75.1931	80.5672	77.8316	79.2803	44.4282	47.0044	45.6113	43.822	43.9905	43.7562	41.9882	38.047	48.6369	63.2304	79.3054	44.9713	47.1317	3.12762	1.33425	9.77005
393	82.653	76.1009	83.1996	75.1586	80.5546	77.7649	79.1722	44.4033	46.9302	45.4649	43.5819	43.7622	43.6211	41.9056	37.8598	48.4743	62.8932	79.2291	44.8285	46.9508	3.10233	1.3869	9.69108
394	82.553	76.0018	83.1952	75.0976	80.5114	77.7873	79.1059	44.436	46.9905	45.3518	43.3759	43.5789	43.7381	41.8721	37.6408	48.3786	62.4184	79.1789	44.7466	46.8096	3.10869	1.47819	9.53908
395	82.5124	75.9154	83.2019	74.9178	80.4935	77.8348	79.0179	44.4064	46.9032	45.3379	43.2646	43.5046	43.7083	41.8586	37.4722	48.3721	62.0091	79.1277	44.6833	46.6841	3.15295	1.4862	9.41681
396	82.4181	75.8275	83.0378	74.6803	80.3289	77.6044	79.0624	44.2905	46.695	45.2215	43.0821	43.2765	43.5029	41.815	37.1793	48.2411	61.8468	78.9942	44.5131	46.517	3.17357	1.49072	9.43877
397	82.1686	75.7587	82.9835	74.5644	80.2445	77.435	78.8905	44.2042	46.513	45.0138	42.8218	42.9538	43.3432	41.6853	36.9584	48.0477	61.4334	78.8636	44.3013	46.2936	3.16145	1.53406	9.34582
398	81.9037	75.5928	82.961	74.513	80.1953	77.4795	78.7396	44.1463	46.5394	44.9367	42.5543	42.7489	43.1837	41.5947	36.8541	47.8924	61.0569	78.7693	44.1851	46.1164	3.14375	1.64555	9.23593
399	81.8298	75.5333	82.9761	74.4676	80.1641	77.3849	78.7096	44.0771	46.5815	44.8922	42.4143	42.5984	43.1578	41.5419	36.7272	47.7863	60.7214	78.7236	44.1127	45.9869	3.15941	1.72348	9.13574
400	81.7332	75.4335	82.7268	74.2543	80.1401	77.2733	78.6144	43.9699	46.5381	44.6652	42.2326	42.4729	43.1181	41.4805	36.6073	47.7005	60.4781	78.5965	43.9757	45.8769	3.15941	1.75628	9.07449
401	81.5684	75.232	82.6199	74.0728	80.0945	77.0469	78.4773	43.8302	46.4684	44.5013	41.9224	42.2014	42.9617	41.2179	36.2373	47.5026	59.9218	78.4445	43.7847	45.5683	3.19639	1.85019	8.97987
402	81.3314	74.9483	82.6223	73.9017	79.94	76.7496	78.2602	43.6429	46.3185	44.2067	41.7378	42.0051	42.7905	41.0086	36.0255	47.2745	59.4385	78.2505	43.5822	45.3075	3.25393	1.8554	8.86743
403	81.1505	74.7957	82.5674	73.7889	79.8085	76.5229	78.0791	43.582	46.1729	44.0934	41.4682	41.8559	42.7078	40.874	35.9002	47.1145	59.0186	78.1019	43.4345	45.123	3.27042	1.89163	8.74644
404	81.2164	74.7381	82.6025	73.8072	79.791	76.397	78.0583	43.5092	46.0951	44.058	41.2379	41.7062	42.6284	40.7084	35.7297	46.9889	58.6676	78.0872	43.3213	44.9446	3.30341	1.95071	8.6707
405	80.9763	74.5874	82.4052	73.7523	79.7384	76.3331	77.9316	43.4087	46.0935	43.9293	41.1636	41.5386	42.542	40.5121	35.5481	46.7833	58.4029	77.9606	43.2267	44.7577	3.25953	1.99069	8.632
406	80.7361	74.4646	82.3705	73.5871	79.5542	76.2528	77.8114	43.2572	46.0628	43.7355	40.9978	41.3858	42.397	40.3344	35.408	46.5777	58.0751	77.8252	43.0878	44.5584	3.26216	2.03493	8.55895
407	80.5474	74.2677	82.215	73.3774	79.3499	76.0656	77.4803	43.1119	45.861	43.5254	40.7561	41.1218	42.2015	40.1043	35.2773	46.3389	57.6795	77.6148	42.8752	44.3203	3.27489	2.05905	8.46438
408	80.6482	74.1328	82.2279	73.3156	79.2058	76.0356	77.4033	43.1407	45.8801	43.5028	40.6386	40.9276	42.2084	39.9641	35.1838	46.2797	57.4052	77.567	42.818	44.2082	3.32023	2.13734	8.39499
409	80.5129	74.023	82.1824	73.2106	79.1621	75.8962	77.379	43.085	45.8309	43.5224	40.4664	40.8453	42.0738	39.8132	34.9719	46.1483	57.0606	77.4809	42.75	44.0136	3.33761	2.18194	8.33576
410	80.2891	74.0564	81.983	73.101	79.1447	75.711	77.1977	42.974	45.7546	43.3723	40.3906	40.7695	41.9775	39.7574	34.8844	46.0114	56.7292	77.3547	42.6522	43.872	3.28976	2.17407	8.23378
411	80.2622	73.9236	81.8236	72.9849	79.021	75.4799	77.0422	42.8388	45.7037	43.2038	40.2237	40.6387	41.8065	39.6431	34.7592	45.8497	56.4559	77.2196	42.5217	43.7029	3.30539	2.20893	8.1749
412	80.1753	73.8566	81.8597	72.9765	78.9884	75.5012	77.0182	42.8349	45.6246	43.094	40.1359	40.4804	41.7853	39.5952	34.6941	45.7911	56.2663	77.1966	42.434	43.6264	3.30905	2.22902	8.12218
413	80.1172	73.8244	81.9283	72.8303	78.9788	75.4912	77.0066	42.738	45.5579	43.0323	40.0442	40.2734	41.7612	39.5857	34.5157	45.6726	56.0558	77.1681	42.3292	43.5182	3.35336	2.2657	8.08439
414	79.9662	73.6878	81.8941	72.702	78.9146	75.4369	76.885	42.6774	45.4706	42.9781	39.8905	40.1519	41.6586	39.527	34.3805	45.5401	55.8256	77.0695	42.2337	43.3864	3.37348	2.29418	8.03677
415	79.8215	73.5365	81.8102	72.5571	78.7999	75.3265	76.7795	42.6405	45.4336	42.9721	39.796	40.075	41.5838	39.5131	34.2953	45.4475	55.6298	76.9473	42.1834	43.2939	3.38879	2.32055	7.98446
416	79.7384	73.4562	81.7826	72.418	78.7727	75.2963	76.8134	42.5862	45.4168	42.9307	39.7509	39.9625	41.5811	39.5173	34.2275	45.421	55.387	76.8968	42.1294	43.2268	3.41396	2.34577	7.90792
417	79.6608	73.3211	81.7246	72.2895	78.7425	75.2527	76.724	42.5023	45.296	42.8328	39.6007	39.7531	41.4342	39.4375	34.1465	45.3468	55.0736	76.8165	41.997	43.0877	3.44128	2.37774	7.82254
418	79.5978	73.3187	81.7388	72.1618	78.6801	75.1879	76.6613	42.4062	45.2176	42.7413	39.4498	39.6827	41.383	39.3212	34.0412	45.2167	54.9143	76.7638	41.8995	42.9753	3.46399	2.3922	7.79855
419	79.3817	73.149	81.6404	72.1203	78.5266	75.0579	76.4445	42.261	45.1264	42.5515	39.2751	39.5507	41.25	39.1391	33.9597	45.0309	54.6398	76.6172	41.7529	42.8039	3.44559	2.41172	7.73164
420	79.2749	73.0814	81.5389	72.0898	78.4877	74.9601	76.4081	42.061	44.9878	42.4181	39.0379	39.3116	41.0259	38.9778	33.743	44.8279	54.3455	76.5487	41.5633	42.584	3.42883	2.4573	7.69681
421	79.2512	72.9118	81.5182	71.9328	78.4684	75.0174	76.3195	41.9025	44.8986	42.2669	38.8413	39.1144	40.814	38.7591	33.4969	44.583	54.1528	76.4885	41.4047	42.3612	3.47827	2.50075	7.71238
422	79.1915	72.6692	81.4116	71.7292	78.4413	74.923	76.225	41.6751	44.6629	42.0906	38.6335	38.8456	40.6955	38.5366	33.2927	44.2404	53.907	76.3701	41.1815	42.1344	3.53593	2.50694	7.68472
423	79.0518	72.5999	81.3037	71.6749	78.3314	74.8735	76.1624	41.4408	44.5585	41.9109	38.3681	38.6024	40.4088	38.3692	33.133	43.888	53.6467	76.2854	40.9761	41.8891	3.50881	2.56708	7.64014
424	78.932	72.6104	81.2423	71.6608	78.2368	74.8544	76.1146	41.1918	44.4064	41.7151	38.1395	38.4086	40.1577	38.1198	33.0104	43.6912	53.3904	76.2359	40.7723	41.6739	3.47217	2.58796	7.60481
425	78.7825	72.5385	81.2496	71.5402	78.151	74.7404	76.1404	41.0582	44.2637	41.5857	38.0344	38.241	40.0816	38.0007	32.8615	43.521	53.2078	76.1632	40.6366	41.5345	3.4933	2.58577	7.5834
426	78.658	72.4053	81.2034	71.3926	78.094	74.6207	76.0362	40.8762	44.1565	41.4596	37.8599	38.0013	39.928	37.8967	32.7266	43.319	52.9383	76.0586	40.4707	41.3617	3.52503	2.62877	7.52455
427	78.5184	72.1991	81.0142	71.2313	77.9593	74.5842	75.8984	40.6257	43.9469	41.2486	37.6052	37.7694	39.7123	37.6453	32.5536	43.0744	52.6681	75.915	40.2392	41.1307	3.52314	2.64354	7.4936
428	78.4489	72.129	81.0467	71.1073	78.0348	74.531	75.8487	40.5052	43.8439	41.1506	37.5725	37.656	39.6342	37.5184	32.5086	42.9206	52.5204	75.8781	40.1456	41.0204	3.5732	2.62848	7.45817
429	78.407	72.0602	81.0859	71.022	78.0649	74.3652	75.696	40.3671	43.7948	40.9987	37.4007	37.4698	39.5407	37.2758	32.3998	42.7627	52.2761	75.8145	40.0062	40.851	3.62285	2.67819	7.41804
430	78.2324	71.9977	80.9174	70.9186	77.8949	74.247	75.4989	40.1351	43.6177	40.85	37.1323	37.255	39.3464	37.1115	32.2226	42.4615	52.0487	75.6724	39.798	40.6381	3.58625	2.71032	7.39007
431	78.0405	71.8505	80.8262	70.8012	77.7851	74.0933	75.4166	39.8945	43.3471	40.6068	36.8915	37.0025	38.9929	36.8124	31.9861	42.2416	51.7761	75.5448	39.5485	40.3618	3.59197	2.70235	7.38993
432	78.0244	71.7919	80.8104	70.5674	77.7513	74.0169	75.3887	39.6528	42.99	40.4163	36.6681	36.7487	38.7328	36.5038	31.7794	41.9664	51.5162	75.4787	39.2952	40.0997	3.6499	2.66564	7.37983
433	77.8221	71.6621	80.7705	70.4331	77.6595	73.8708	75.2577	39.4125	42.8176	40.2244	36.4315	36.5195	38.5308	36.2577	31.6002	41.6332	51.2848	75.3537	39.0811	39.8613	3.66969	2.69075	7.35931
434	77.6681	71.4957	80.6788	70.2215	77.5256	73.7414	75.0892	39.0875	42.5509	39.977	36.1309	36.1746	38.3016	35.9139	31.3144	41.2573	51.043	75.2029	38.7842	39.566	3.70055	2.71812	7.37576
435	77.536	71.2667	80.609	70.0923	77.4836	73.6883	75.0006	38.8261	42.3446	39.7427	35.8981	35.8833	38.0316	35.6615	31.0714	41.0069	50.723	75.0966	38.539	39.2989	3.73583	2.74048	7.34772
436	77.4165	71.2074	80.5298	69.9475	77.4278	73.6188	74.9417	38.7025	42.2009	39.61	35.7162	35.7511	37.8416	35.5248	30.9055	40.8698	50.5032	75.0128	38.3961	39.129	3.74464	2.74872	7.32592
437	77.3068	71.1309	80.3511	69.8592	77.3219	73.5204	74.8131	38.5519	41.9918	39.3969	35.5819	35.5456	37.6495	35.3554	30.7337	40.6806	50.267	74.9005	38.2136	38.9372	3.71706	2.731	7.30049
438	77.2305	71.0552	80.3238	69.7413	77.2137	73.4211	74.6577	38.2946	41.8457	39.2018	35.3999	35.3059	37.4789	35.0921	30.5799	40.4777	50.0653	74.8062	38.0096	38.7388	3.73678	2.75403	7.29326
439	77.2026	71.0642	80.3417	69.6163	77.2237	73.3899	74.615	38.211	41.7378	39.117	35.3368	35.184	37.3768	34.9657	30.5434	40.3707	50.0531	74.7791	37.9173	38.6619	3.76837	2.75008	7.31271
440	77.1414	71.0393	80.3922	69.5897	77.2686	73.4269	74.6573	38.1654	41.689	39.2023	35.3273	35.1951	37.4029	34.9902	30.5471	40.3752	50.1683	74.7879	37.9158	38.6967	3.7869	2.74121	7.3526
441	77.0039	70.8903	80.3709	69.4891	77.2477	73.4976	74.7019	38.1839	41.5974	39.1404	35.2701	35.1566	37.3534	34.9841	30.5092	40.3291	50.1018	74.7431	37.8697	38.6555	3.80915	2.72617	7.3375
442	76.933	70.817	80.2811	69.4125	77.2637	73.4771	74.6503	38.1367	41.5254	39.0789	35.2197	35.1266	37.3306	34.9842	30.4844	40.2888	50.0417	74.6907	37.8175	38.6259	3.81314	2.71252	7.31966
443	76.9622	70.8217	80.3106	69.361	77.1847	73.4168	74.6612	38.0396	41.4373	39.0805	35.1441	35.06	37.2563	34.9557	30.4784	40.2188	50.0026	74.674	37.7523	38.5824	3.82883	2.71464	7.30899
444	76.8672	70.7775	80.2797	69.3563	77.1497	73.4068	74.6339	37.9707	41.3627	39.0195	35.063	34.9257	37.1503	35.0019	30.4509	40.0816	49.9313	74.6387	37.6683	38.5232	3.81712	2.73291	7.28045
445	76.7647	70.6668	80.1651	69.2052	77.1376	73.3587	74.6126	37.8813	41.2953	38.9505	35.0249	34.858	37.0853	34.9948	30.4003	39.9948	49.862	74.5587	37.602	38.4674	3.83403	2.72525	7.26666
446	76.6815	70.5833	80.0746	68.9817	77.0097	73.3277	74.5137	37.8134	41.2369	38.8629	34.9263	34.7823	37.0247	34.9526	30.345	39.8622	49.6849	74.4532	37.5244	38.3739	3.85757	2.73528	7.21357
447	76.6804	70.5852	80.1464	68.9114	76.9554	73.2786	74.4676	37.7395	41.1897	38.8224	34.8188	34.678	36.9354	34.9107	30.3754	39.8002	49.5466	74.4321	37.4497	38.3137	3.88767	2.76405	7.15689
448	76.6566	70.5936	80.195	68.969	77.0031	73.2607	74.417	37.7217	41.1497	38.8073	34.7982	34.5837	36.8809	34.9111	30.3379	39.7572	49.4424	74.4421	37.4121	38.2659	3.88846	2.77689	7.12678
449	76.5925	70.5435	80.1427	68.9419	76.9214	73.1523	74.3147	37.6349	41.0245	38.7685	34.7725	34.5417	36.8716	34.8996	30.2809	39.6769	49.3782	74.3727	37.3484	38.2214	3.88084	2.74433	7.11513
450	76.4706	70.3834	80.0331	68.9447	76.8618	73.056	74.1805	37.5571	40.9185	38.7086	34.7066	34.485	36.8715	34.8897	30.222	39.607	49.2786	74.2757	37.2752	38.1738	3.86694	2.72904	7.09019
451	76.3745	70.2972	79.9089	68.8524	76.8052	73.0334	74.0474	37.4562	40.8964	38.6412	34.6973	34.3891	36.8509	34.9083	30.2348	39.5237	49.2216	74.1884	37.216	38.1479	3.8583	2.73722	7.05893
452	76.4188	70.3124	79.9222	68.7974	76.839	73.0892	74.0965	37.4148	40.9222	38.6506	34.6861	34.3885	36.8523	34.9456	30.3079	39.5291	49.2519	74.2108	37.2124	38.1774	3.87677	2.74903	7.0463
453	76.4669	70.3736	80.0465	68.8652	76.9491	73.1295	74.2333	37.4499	40.9558	38.6777	34.7438	34.3942	36.9229	34.9954	30.3677	39.6003	49.3022	74.2949	37.2443	38.2377	3.8958	2.7499	7.04376
454	76.3871	70.3306	80.0011	68.7943	77.0108	73.1098	74.2011	37.439	40.9157	38.6769	34.7481	34.3845	36.9443	34.9675	30.3223	39.6253	49.2489	74.2621	37.2328	38.2217	3.90922	2.73762	7.03902
455	76.2672	70.1646	79.8136	68.6951	76.8959	72.9948	74.126	37.3795	40.8315	38.6122	34.7402	34.2897	36.9337	34.9206	30.2797	39.6017	49.1739	74.1367	37.1706	38.1819	3.89598	2.72628	7.02636
456	76.1736	70.058	79.6699	68.5529	76.7034	72.9106	74.0292	37.3093	40.7491	38.5591	34.5985	34.173	36.8909	34.8862	30.17	39.4715	49.0211	74.0139	37.0778	38.0879	3.88538	2.75277	6.99689
457	76.0947	69.9532	79.5781	68.461	76.6441	72.8174	73.8413	37.1944	40.7325	38.4828	34.5217	34.0691	36.8401	34.8133	30.0688	39.3624	48.8608	73.9128	37.0001	37.9891	3.89277	2.7794	6.96809
458	76.043	69.8579	79.5727	68.3877	76.6096	72.7327	73.7436	37.0966	40.6982	38.4109	34.4562	33.9826	36.7908	34.7166	30.0281	39.2716	48.7358	73.8496	36.9289	37.9086	3.92019	2.79406	6.9395
459	75.942	69.8393	79.526	68.3187	76.56	72.6558	73.6425	37.0785	40.702	38.3802	34.4041	33.9067	36.7559	34.6379	30.0353	39.2067	48.593	73.7835	36.8943	37.8458	3.91699	2.82255	6.88906
460	75.8818	69.894	79.5769	68.2768	76.5509	72.652	73.6694	37.0855	40.7035	38.4004	34.3945	33.8808	36.7624	34.6454	30.0523	39.1425	48.55	73.786	36.8929	37.8305	3.92365	2.83483	6.86322
461	75.8924	69.9084	79.604	68.3082	76.6161	72.6747	73.66	37.1395	40.786	38.4764	34.4339	33.8556	36.8205	34.668	30.071	39.1441	48.477	73.8091	36.9383	37.8361	3.9282	2.87168	6.82467
462	75.9188	69.8468	79.5809	68.3154	76.628	72.6522	73.6473	37.18	40.9002	38.5735	34.4752	33.861	36.8554	34.7204	30.1383	39.1736	48.355	73.7985	36.998	37.8485	3.93605	2.91324	6.75205
463	75.8897	69.8158	79.4945	68.2411	76.5235	72.6258	73.4821	37.1953	40.8954	38.5472	34.4267	33.8158	36.8944	34.7399	30.1504	39.1841	48.2506	73.7246	36.9761	37.8439	3.92485	2.93105	6.70488
464	75.8474	69.7767	79.4973	68.1915	76.4395	72.5881	73.4692	37.2364	40.8574	38.5429	34.4221	33.7695	36.9576	34.7898	30.1864	39.1966	48.165	73.6871	36.9657	37.8591	3.93169	2.93222	6.65402
465	75.8489	69.749	79.5021	68.1531	76.4683	72.5128	73.4797	37.2491	40.8513	38.5094	34.4328	33.7542	36.9996	34.8025	30.1993	39.2283	48.1136	73.6734	36.9594	37.8687	3.95342	2.9279	6.62916
466	75.8992	69.7515	79.5136	68.1647	76.5465	72.5227	73.5059	37.2756	40.9445	38.5165	34.4389	33.7581	37.0425	34.8204	30.2278	39.255	48.1259	73.7006	36.9867	37.8943	3.96634	2.95817	6.62357
467	75.9616	69.8295	79.575	68.243	76.5898	72.5906	73.5698	37.343	41.0685	38.593	34.522	33.8423	37.1198	34.8822	30.39	39.3596	48.1989	73.7656	37.0738	37.9901	3.95724	2.97037	6.60063
468	75.9395	69.893	79.5642	68.2657	76.6152	72.6269	73.5434	37.3632	41.1297	38.6506	34.5972	33.9338	37.2082	34.947	30.5024	39.4346	48.2637	73.7783	37.1349	38.0712	3.93829	2.95782	6.58669
469	75.8828	69.8898	79.57	68.2312	76.6231	72.6401	73.5279	37.3926	41.1502	38.6789	34.6093	33.9405	37.2124	35.0217	30.485	39.4224	48.2415	73.7664	37.1543	38.0766	3.94364	2.96454	6.57358
470	75.8405	69.8413	79.5415	68.1451	76.5955	72.6178	73.4866	37.4308	41.1656	38.7337	34.6179	33.8536	37.2453	35.0649	30.449	39.3747	48.2252	73.724	37.1603	38.0718	3.95912	2.99955	6.56926
471	75.8654	69.8398	79.5363	68.1348	76.6069	72.6041	73.4942	37.4663	41.2157	38.7402	34.6214	33.8365	37.3372	35.0965	30.4365	39.365	48.303	73.7259	37.176	38.1076	3.96469	3.02194	6.59608
472	75.9243	69.8493	79.5944	68.2048	76.6383	72.6197	73.5502	37.4799	41.3207	38.7567	34.6306	33.8822	37.3542	35.1448	30.4686	39.3685	48.345	73.7687	37.214	38.1362	3.96877	3.0451	6.59716
473	75.9724	69.8716	79.6626	68.241	76.66	72.6212	73.619	37.4731	41.5024	38.8518	34.7036	33.9414	37.3619	35.2287	30.5019	39.3486	48.3865	73.8068	37.2945	38.1655	3.97965	3.08705	6.59299
474	75.9875	69.909	79.6896	68.2628	76.664	72.7061	73.7045	37.4968	41.6146	38.9218	34.7532	33.9877	37.4201	35.3384	30.5398	39.3572	48.456	73.8462	37.3548	38.2223	3.97212	3.11156	6.59541
475	75.993	69.8667	79.6539	68.2116	76.6457	72.738	73.7092	37.4876	41.6158	38.9306	34.734	33.9697	37.4234	35.3645	30.5629	39.3237	48.5024	73.8312	37.3475	38.2354	3.97923	3.12186	6.60235
476	75.9367	69.7525	79.6003	68.1199	76.6062	72.7424	73.7027	37.4	41.5989	38.8799	34.6749	33.904	37.3963	35.3138	30.5834	39.2597	48.4783	73.7801	37.2915	38.2063	3.99697	3.13888	6.59081
477	75.8463	69.6601	79.5047	68.0603	76.5739	72.6652	73.6362	37.2713	41.5552	38.8041	34.6269	33.8353	37.3505	35.2756	30.5543	39.1806	48.3808	73.7067	37.2186	38.1484	3.99504	3.14191	6.56368
478	75.7891	69.6188	79.4902	68.0278	76.5752	72.6608	73.6114	37.2354	41.5332	38.7797	34.6034	33.7908	37.3115	35.3483	30.5173	39.1501	48.3355	73.6819	37.1885	38.1325	4.00152	3.14792	6.54893
479	75.8252	69.5872	79.4678	67.983	76.5711	72.6429	73.5598	37.1932	41.4719	38.7403	34.5747	33.761	37.2982	35.4242	30.5098	39.1339	48.3296	73.6624	37.1482	38.1391	4.01567	3.13557	6.54064
480	75.7206	69.4972	79.346	67.9046	76.5014	72.4813	73.3797	37.0623	41.2864	38.6139	34.5059	33.6441	37.1976	35.3496	30.4252	39.0942	48.1998	73.5473	37.0225	38.0533	4.01004	3.10088	6.52428
481	75.5939	69.3984	79.2785	67.8347	76.4222	72.3262	73.1779	36.9372	41.0858	38.4558	34.377	33.5109	37.0602	35.2606	30.3027	38.9901	48.0199	73.4331	36.8733	37.9267	4.01422	3.07371	6.49977
482	75.508	69.3262	79.2853	67.7736	76.3421	72.2806	73.1151	36.8608	40.9819	38.3706	34.2902	33.4393	36.9638	35.2568	30.2582	38.9248	47.9328	73.3758	36.7886	37.8673	4.02738	3.06396	6.48001
483	75.5085	69.3317	79.256	67.7251	76.3324	72.3067	73.1954	36.8337	40.9795	38.4169	34.279	33.4612	36.9715	35.2951	30.3136	38.8782	47.946	73.3794	36.7941	37.8809	4.02756	3.06539	6.46294
484	75.4486	69.3369	79.224	67.6765	76.3501	72.3119	73.1448	36.8297	40.9661	38.4214	34.2637	33.4157	36.9733	35.2986	30.3481	38.8575	47.9528	73.3561	36.7793	37.8861	4.02744	3.07695	6.4543
485	75.4024	69.2857	79.203	67.5973	76.3049	72.284	73.0661	36.7835	40.9319	38.4038	34.2666	33.3515	36.9655	35.2905	30.3906	38.848	47.9216	73.3062	36.7475	37.8832	4.0418	3.07983	6.43047
486	75.3485	69.2248	79.2114	67.5728	76.2147	72.3392	73.1085	36.7445	40.9531	38.3985	34.2509	33.341	36.9339	35.2726	30.4808	38.799	47.8979	73.2886	36.7376	37.8768	4.04152	3.09231	6.39618
487	75.3973	69.1833	79.2308	67.5845	76.2153	72.4148	73.0968	36.736	40.9507	38.4292	34.2143	33.3313	36.8779	35.3009	30.5278	38.7368	47.9515	73.3033	36.7323	37.879	4.05197	3.1057	6.40078
488	75.3871	69.1698	79.1929	67.5331	76.122	72.3684	73.0514	36.6545	40.8587	38.3594	34.1649	33.2658	36.7994	35.2815	30.4973	38.6484	47.9377	73.2607	36.6607	37.8329	4.04723	3.09286	6.40626
489	75.3083	69.101	79.0733	67.4354	76.0929	72.2577	72.9454	36.5243	40.7074	38.2189	34.0465	33.1388	36.7211	35.1729	30.3589	38.467	47.8109	73.1734	36.5272	37.7062	4.04742	3.08103	6.40419
490	75.2391	69.0577	78.972	67.4032	76.0832	72.1554	72.8697	36.412	40.5184	38.0931	33.9355	33.0333	36.6289	35.0476	30.2414	38.3065	47.6399	73.1115	36.3985	37.5729	4.03513	3.05108	6.38165
491	75.2034	68.9992	78.9669	67.3431	76.0364	72.0836	72.7882	36.3207	40.3717	38.0348	33.8216	32.9634	36.5237	34.9672	30.2397	38.2336	47.5231	73.0601	36.3024	37.4975	4.05267	3.03579	6.34588
492	75.1736	68.9384	78.9335	67.264	75.9975	72.0831	72.7063	36.235	40.2256	37.9506	33.7808	32.8188	36.4178	34.9052	30.2142	38.1461	47.4233	73.0138	36.2022	37.4213	4.06694	3.02309	6.3215
493	75.1657	68.9094	78.8692	67.1941	75.9284	72.0813	72.6914	36.2256	40.185	37.8673	33.7275	32.7878	36.3213	34.853	30.2519	38.0577	47.4077	72.9771	36.1586	37.3783	4.06387	3.01698	6.31131
494	75.1048	68.8863	78.8712	67.175	75.87	72.021	72.6757	36.1841	40.191	37.8074	33.65	32.7389	36.2416	34.7733	30.2734	37.9348	47.363	72.9434	36.1143	37.3172	4.06268	3.03962	6.29569
495	75.0587	68.9004	78.8639	67.1779	75.8512	71.9599	72.6599	36.1043	40.1164	37.77	33.5758	32.6744	36.1363	34.6738	30.2167	37.853	47.2769	72.9246	36.0482	37.2313	4.05409	3.04193	6.28977
496	75.0753	68.8593	78.7862	67.157	75.8661	71.9369	72.6391	36.0032	40.0231	37.7117	33.4974	32.6031	36.0576	34.5904	30.198	37.7783	47.2071	72.9028	35.9677	37.1663	4.05138	3.03776	6.27722
497	74.9986	68.7782	78.7223	67.0752	75.7625	71.8979	72.5946	35.8966	39.9273	37.6261	33.4341	32.4766	35.9697	34.4842	30.1645	37.6413	47.1336	72.8328	35.8721	37.0787	4.05135	3.04118	6.26867
498	74.8895	68.7344	78.6897	66.9742	75.7136	71.8255	72.5454	35.8541	39.8839	37.5394	33.3691	32.4203	35.8644	34.4178	30.1446	37.503	47.0765	72.7675	35.8134	37.0013	4.06242	3.04292	6.25985
499	74.7973	68.6544	78.6584	66.8751	75.6548	71.769	72.4535	35.7813	39.8106	37.4433	33.2628	32.3103	35.7304	34.3127	30.0786	37.3895	46.9256	72.6946	35.7217	36.8874	4.07954	3.05657	6.23187
500	74.76	68.5927	78.6092	66.8034	75.583	71.7229	72.3768	35.7122	39.6579	37.3888	33.1669	32.2336	35.6055	34.2111	30.0266	37.2827	46.7994	72.6354	35.6319	36.7851	4.08542	3.03836	6.20943
501	74.7146	68.5122	78.5129	66.7542	75.5425	71.5846	72.2487	35.5662	39.493	37.2625	33.0549	32.0883	35.4094	34.1069	29.9227	37.1284	46.6185	72.5528	35.493	36.6372	4.08482	3.0279	6.18187
502	74.6536	68.4742	78.5037	66.7288	75.5304	71.45	72.1573	35.4515	39.3564	37.1846	32.9587	31.984	35.2569	34.0042	29.82	36.9905	46.5105	72.4997	35.387	36.5164	4.0947	3.01947	6.18155
503	74.6149	68.4095	78.5293	66.7275	75.5192	71.4491	72.1463	35.3668	39.2766	37.1243	32.8782	31.8671	35.1739	33.9394	29.764	36.8989	46.4351	72.4851	35.3026	36.4423	4.10737	3.03298	6.17531
504	74.5999	68.368	78.5278	66.6735	75.5254	71.4483	72.1631	35.316	39.2472	37.0645	32.8373	31.8023	35.1032	33.9073	29.7705	36.8328	46.4033	72.4723	35.2535	36.4034	4.12579	3.04064	6.16642
505	74.522	68.3028	78.4563	66.5988	75.4006	71.4279	72.037	35.2292	39.1878	36.9987	32.7477	31.7379	34.9986	33.8408	29.7645	36.7589	46.2908	72.3922	35.1803	36.3307	4.11709	3.04699	6.13343
506	74.5391	68.324	78.434	66.5816	75.414	71.3813	72.0054	35.1674	39.1323	36.9275	32.6987	31.7206	34.9176	33.7885	29.7733	36.6941	46.2035	72.3828	35.1293	36.2754	4.11761	3.03257	6.10426
507	74.573	68.3244	78.4549	66.5956	75.4254	71.3783	71.9953	35.1369	39.1106	36.9185	32.6522	31.724	34.8306	33.7868	29.8227	36.6543	46.1636	72.3924	35.1084	36.2516	4.12403	3.03241	6.07937
508	74.6091	68.3464	78.5247	66.6482	75.4377	71.4218	72.0571	35.1316	39.0888	36.958	32.6548	31.7046	34.8406	33.809	29.8908	36.6425	46.1718	72.435	35.1076	36.2709	4.12716	3.03608	6.06173
509	74.6457	68.3926	78.6127	66.6623	75.4817	71.4608	72.1674	35.1046	39.0258	36.9804	32.6707	31.7213	34.8384	33.8036	29.93	36.6544	46.1579	72.489	35.1006	36.2769	4.14324	3.01102	6.04662
510	74.6451	68.4017	78.6169	66.6617	75.5169	71.4766	72.2392	35.0636	38.9875	36.9526	32.6351	31.7052	34.7788	33.7609	29.9323	36.6624	46.1729	72.5083	35.0688	36.2615	4.14561	3.0059	6.06025
511	74.6405	68.3959	78.575	66.6392	75.4825	71.4734	72.2351	35.0064	38.9125	36.8949	32.5756	31.5778	34.6746	33.6427	29.8988	36.5826	46.1093	72.4917	34.9934	36.1816	4.13721	3.02024	6.06034
512	74.6013	68.4086	78.5478	66.591	75.5179	71.4769	72.2188	34.9275	38.8361	36.8576	32.4957	31.4496	34.6123	33.5824	29.8871	36.4814	46.0297	72.4803	34.9133	36.1186	4.14081	3.04183	6.03934
513	74.5525	68.4237	78.5412	66.5828	75.5243	71.4531	72.2279	34.9047	38.7898	36.7995	32.4615	31.4257	34.5691	33.5301	29.8936	36.4777	45.9731	72.4722	34.8762	36.0887	4.13621	3.03121	6.02262
514	74.5519	68.396	78.5149	66.5806	75.5284	71.462	72.2095	34.884	38.7331	36.7682	32.4484	31.4407	34.5319	33.5423	29.8895	36.4471	45.9483	72.4633	34.8549	36.0718	4.13511	3.00624	6.01408
515	74.5517	68.4077	78.5225	66.6249	75.5105	71.4717	72.2301	34.8135	38.6741	36.7327	32.3757	31.3967	34.4502	33.5068	29.873	36.381	45.9653	72.4742	34.7985	36.0353	4.12174	3.00848	6.03333
516	74.4802	68.3398	78.5116	66.5663	75.465	71.4332	72.1899	34.6639	38.4989	36.6262	32.2261	31.267	34.2966	33.3638	29.7789	36.2715	45.8681	72.4266	34.6564	35.9158	4.13449	3.00164	6.04092
517	74.376	68.2613	78.457	66.4459	75.3838	71.4076	72.1521	34.5203	38.2916	36.4665	32.0912	31.0872	34.1408	33.2347	29.6354	36.1559	45.7669	72.3548	34.4914	35.7867	4.14542	2.98718	6.05807
518	74.4351	68.2938	78.5023	66.4722	75.4108	71.3893	72.181	34.4801	38.1949	36.3285	32.0278	31.0319	34.0627	33.1537	29.5513	36.0706	45.7398	72.3835	34.4126	35.7156	4.15355	2.96215	6.0808
519	74.4464	68.2447	78.4603	66.4633	75.3604	71.3312	72.1316	34.4453	38.1921	36.2723	31.9741	31.0142	33.9989	33.0605	29.5989	35.9751	45.6425	72.3483	34.3796	35.6552	4.15101	2.96792	6.04159
520	74.3453	68.189	78.4193	66.3904	75.3078	71.2473	72.1056	34.4213	38.2087	36.2646	31.9146	30.953	33.9711	32.9567	29.6254	35.8938	45.5114	72.2864	34.3524	35.5917	4.15621	3.0013	5.99287
521	74.2232	68.1155	78.4405	66.3105	75.28	71.2493	72.0909	34.365	38.1739	36.2114	31.8456	30.8762	33.8875	32.8696	29.5883	35.7606	45.4111	72.2443	34.2944	35.5034	4.17921	3.01708	5.97422
522	74.1486	68.0411	78.3706	66.2485	75.2643	71.2135	72.0151	34.2623	38.0591	36.1494	31.7633	30.7556	33.759	32.8105	29.5395	35.6665	45.3483	72.186	34.1979	35.4248	4.18302	3.02068	5.97454
523	74.1292	68.0254	78.3111	66.1987	75.1999	71.1583	71.9785	34.2672	37.9624	36.1568	31.7241	30.7147	33.7084	32.785	29.5811	35.6547	45.3796	72.143	34.165	35.4218	4.17575	3.01084	5.98361
524	74.1186	68.0877	78.3252	66.1874	75.2179	71.1569	72.0263	34.2749	37.9356	36.1519	31.7392	30.758	33.7257	32.7912	29.7039	35.6997	45.4757	72.16	34.1719	35.4792	4.17285	2.98618	5.99235
525	74.1304	68.0792	78.3285	66.2259	75.2082	71.1463	71.9578	34.3012	37.9342	36.1362	31.7462	30.7994	33.7227	32.7814	29.7724	35.7506	45.515	72.1538	34.1834	35.5084	4.16651	2.97015	5.99411
526	74.1889	68.136	78.3754	66.3103	75.2311	71.2581	72.0235	34.2911	38.025	36.1993	31.7842	30.8139	33.7206	32.8343	29.9063	35.7962	45.5236	72.2176	34.2227	35.5562	4.1513	2.9973	5.96042
527	74.1564	68.1229	78.3065	66.2714	75.174	71.2721	72.0821	34.2796	37.9941	36.1735	31.7864	30.7728	33.7174	32.798	29.9393	35.801	45.471	72.1979	34.2013	35.5453	4.13536	2.99447	5.93509
528	74.0954	68.062	78.2974	66.2212	75.1724	71.2848	72.0374	34.2669	37.9499	36.1575	31.7693	30.7827	33.7156	32.8094	29.9458	35.8054	45.4395	72.1672	34.1853	35.5431	4.14993	2.97839	5.91925
529	73.9478	68.0016	78.284	66.2206	75.1564	71.2242	71.9915	34.204	37.9177	36.1403	31.7276	30.7954	33.7034	32.7726	29.9098	35.7533	45.4272	72.118	34.157	35.5133	4.14605	2.96989	5.92725
530	73.8835	67.8997	78.2054	66.1406	75.104	71.0985	71.9197	34.1385	37.8221	36.0505	31.6626	30.7044	33.6035	32.7111	29.872	35.6476	45.3485	72.0359	34.0756	35.4365	4.15621	2.96344	5.917
531	73.8894	67.8589	78.1966	66.0851	75.1004	71.0652	71.8673	34.0811	37.7659	35.981	31.604	30.6362	33.5648	32.642	29.8578	35.5649	45.3006	72.009	34.0136	35.386	4.17544	2.96513	5.91055
532	73.8366	67.8346	78.1437	66.0511	75.036	71.0603	71.8283	34.0184	37.7109	35.9383	31.5584	30.605	33.5598	32.584	29.8818	35.5389	45.261	71.9701	33.9662	35.3651	4.16297	2.95846	5.89532
533	73.8047	67.8472	78.1422	66.0164	75.0264	71.0239	71.8169	34.0053	37.7166	35.8919	31.5585	30.5598	33.5737	32.5736	29.9165	35.5277	45.2499	71.954	33.9464	35.3683	4.1666	2.96538	5.8827
534	73.811	67.8257	78.0395	65.9553	74.9623	70.9357	71.7849	33.9194	37.6815	35.8085	31.4504	30.5135	33.505	32.5161	29.9656	35.4837	45.1803	71.9021	33.8747	35.3301	4.15543	2.97524	5.854
535	73.8035	67.7865	78.0288	65.9502	74.9142	70.9621	71.7791	33.8238	37.626	35.7921	31.3909	30.4666	33.4274	32.442	29.9165	35.4618	45.1212	71.8892	33.8199	35.2738	4.15302	2.97996	5.85525
536	73.7069	67.6703	77.9434	65.8875	74.8653	70.923	71.7048	33.7473	37.5292	35.7372	31.319	30.3836	33.3758	32.3708	29.8821	35.4227	45.0124	71.8145	33.7433	35.2128	4.15457	2.97798	5.82975
537	73.6702	67.6515	77.9296	65.8549	74.8111	70.8885	71.6769	33.7072	37.4713	35.7149	31.3117	30.3879	33.3841	32.3684	29.8727	35.3752	44.9349	71.7832	33.7186	35.1871	4.15401	2.95613	5.79857
538	73.676	67.6245	77.9144	65.8566	74.7516	70.8291	71.6682	33.678	37.4544	35.679	31.273	30.3451	33.3541	32.3563	29.8777	35.3645	44.868	71.7601	33.6859	35.1641	4.1498	2.96467	5.77303
539	73.6947	67.6382	77.908	65.8365	74.7003	70.8152	71.6791	33.6165	37.4501	35.6407	31.2301	30.2741	33.3018	32.3422	29.8398	35.2873	44.7779	71.7531	33.6423	35.1098	4.14653	2.98568	5.74902
540	73.7099	67.6239	77.8964	65.7872	74.72	70.7468	71.685	33.5915	37.466	35.6048	31.2039	30.2333	33.2896	32.2982	29.7869	35.2396	44.6645	71.7385	33.6199	35.0558	4.16393	3.00163	5.7194
541	73.7222	67.6143	77.9351	65.7904	74.7203	70.7215	71.6371	33.6282	37.4588	35.6035	31.2173	30.2476	33.3692	32.3108	29.8436	35.3204	44.6465	71.7344	33.6311	35.0981	4.17647	2.99233	5.69186
542	73.702	67.6744	77.9547	65.8493	74.8173	70.7695	71.7307	33.7202	37.5429	35.6693	31.2832	30.302	33.4888	32.3734	29.9484	35.4253	44.7149	71.7854	33.7035	35.1902	4.16531	3.0014	5.68069
543	73.6837	67.6986	78.0011	65.8965	74.9535	70.8333	71.8644	33.7655	37.6247	35.7299	31.3004	30.3325	33.6005	32.4092	30.0384	35.4305	44.7199	71.8473	33.7506	35.2397	4.17417	3.02545	5.6494
544	73.6385	67.6806	77.9582	65.8525	74.9361	70.8397	71.8684	33.7348	37.5679	35.7429	31.2762	30.329	33.6491	32.4011	30.0636	35.3915	44.6016	71.8249	33.7302	35.2214	4.1714	3.01534	5.5912
545	73.7048	67.7244	77.9883	65.8687	74.9536	70.8118	71.8319	33.782	37.5713	35.7464	31.2548	30.3639	33.7188	32.3944	30.139	35.4191	44.6087	71.8405	33.7437	35.256	4.17583	3.01166	5.57304
546	73.715	67.6702	78.0342	65.9256	74.9484	70.7317	71.7974	33.8044	37.5512	35.7281	31.2594	30.3562	33.7257	32.3628	30.1475	35.4355	44.6189	71.8318	33.7399	35.2581	4.18615	3.00356	5.5791
547	73.7509	67.7086	78.0621	65.9597	74.9438	70.7663	71.8288	33.7959	37.566	35.737	31.3028	30.3648	33.7794	32.3694	30.1957	35.4899	44.5954	71.86	33.7533	35.286	4.17924	2.99835	5.55414
548	73.8499	67.7699	78.0364	65.9428	74.956	70.8174	71.8582	33.8338	37.564	35.7833	31.3258	30.4223	33.8848	32.4293	30.2989	35.5532	44.6597	71.8901	33.7858	35.3652	4.17364	2.98462	5.54305
549	73.8806	67.744	77.9892	65.9219	74.9771	70.8799	71.8699	33.8386	37.5548	35.8127	31.3478	30.4195	33.9613	32.4731	30.3574	35.6128	44.7018	71.8947	33.7947	35.4213	4.17375	2.98295	5.53694
550	73.8279	67.6628	77.9577	65.9263	74.9001	70.8212	71.8353	33.8284	37.5875	35.8284	31.3244	30.4313	34.0309	32.4756	30.3863	35.6254	44.6669	71.8473	33.8	35.437	4.16735	2.99738	5.51097
551	73.7729	67.5723	77.9379	65.833	74.7852	70.6942	71.7304	33.8447	37.6209	35.8038	31.2938	30.4235	34.0643	32.4087	30.394	35.6445	44.5585	71.7608	33.7973	35.414	4.18675	3.0124	5.47104
552	73.8273	67.6113	78.0408	65.913	74.8597	70.7434	71.7425	33.91	37.6763	35.8881	31.3577	30.4576	34.098	32.4447	30.4453	35.6941	44.5943	71.8197	33.8579	35.4553	4.19798	3.02149	5.46773
553	73.8345	67.6748	78.0611	65.9358	74.9623	70.8577	71.8284	33.9566	37.7179	35.9514	31.4116	30.5383	34.1654	32.5002	30.4944	35.7353	44.6153	71.8792	33.9152	35.5021	4.19507	3.01164	5.4539
554	73.8311	67.7344	78.0818	66.0141	74.9481	70.8981	71.8776	33.9872	37.7742	36.0302	31.4264	30.5488	34.2588	32.5436	30.5255	35.7833	44.599	71.9122	33.9534	35.542	4.16801	3.03685	5.42885
555	73.7883	67.7153	78.0363	66.0653	74.9003	70.8883	71.852	33.963	37.7409	35.9876	31.4009	30.5291	34.2827	32.4774	30.5068	35.7619	44.5925	71.8923	33.9243	35.5243	4.13929	3.02985	5.43804
556	73.7454	67.6924	78.0016	66.0604	74.9027	70.8568	71.8247	33.9579	37.7768	35.9918	31.3619	30.5239	34.2974	32.3788	30.5749	35.7321	44.5508	71.8691	33.9225	35.5068	4.13407	3.05148	5.41792
557	73.705	67.6862	77.9821	66.0599	74.9174	70.8156	71.7177	33.971	37.8098	35.9864	31.3452	30.4934	34.281	32.3205	30.6777	35.7274	44.4904	71.8406	33.9212	35.4994	4.13122	3.07304	5.37887
558	73.7479	67.68	77.9867	66.0835	74.8626	70.7741	71.6946	34.0221	37.8815	35.9823	31.3518	30.4613	34.3292	32.3246	30.6938	35.7478	44.4707	71.8328	33.9398	35.5132	4.1263	3.10295	5.36394
559	73.826	67.732	77.9921	66.1013	74.8707	70.7581	71.7655	34.0443	37.9493	36.0617	31.3723	30.4805	34.3832	32.3683	30.7102	35.7961	44.4222	71.8637	33.9816	35.536	4.12226	3.12808	5.33113
560	73.9096	67.812	78.0542	66.1297	74.9227	70.7833	71.782	34.0834	38.0335	36.1326	31.3921	30.4887	34.4552	32.4155	30.7771	35.8706	44.3627	71.9134	34.0261	35.5762	4.12951	3.16034	5.28127
561	73.9072	67.7705	78.151	66.1452	74.9772	70.8187	71.7775	34.1181	38.0674	36.1664	31.4018	30.4972	34.4767	32.4243	30.792	35.8956	44.3187	71.9353	34.0502	35.5815	4.16171	3.17248	5.2575
562	73.8468	67.8006	78.1388	66.094	74.9799	70.7978	71.7526	34.0756	38.0449	36.1032	31.3822	30.4746	34.5078	32.3643	30.7705	35.8617	44.2551	71.9158	34.0161	35.5519	4.16229	3.16506	5.24296
563	73.8787	67.8224	78.1387	66.1061	74.9453	70.7595	71.7537	34.0089	37.9464	36.0418	31.3379	30.4326	34.4635	32.2558	30.7584	35.8177	44.2195	71.9149	33.9535	35.503	4.15586	3.14426	5.24911
564	73.8317	67.7709	78.0169	66.0973	74.9197	70.6811	71.6895	33.8972	37.8653	35.972	31.2808	30.3796	34.4656	32.2197	30.7236	35.7523	44.1844	71.8582	33.879	35.4691	4.1333	3.13321	5.24695
565	73.7746	67.7126	78.0075	66.157	74.9036	70.7207	71.689	33.9007	37.8449	35.9656	31.2976	30.396	34.5448	32.2134	30.7604	35.7677	44.2725	71.8521	33.881	35.5118	4.11851	3.1176	5.27271
566	73.7781	67.689	78.0309	66.1637	74.9536	70.7575	71.6876	33.9631	37.9269	35.9701	31.3358	30.4193	34.574	32.2024	30.8505	35.7976	44.39	71.8658	33.923	35.5629	4.13158	3.13021	5.30213
567	73.9047	67.7708	78.1267	66.2222	75.0633	70.8202	71.791	34.0926	38.1302	36.0823	31.4311	30.535	34.68	32.2636	31.0004	35.904	44.3926	71.957	34.0542	35.6481	4.14809	3.16204	5.25654
568	73.9655	67.8433	78.2207	66.2996	75.1041	70.8519	71.9241	34.1721	38.2427	36.1199	31.5052	30.6029	34.7626	32.2814	31.1353	36.0414	44.3271	72.0299	34.1286	35.7096	4.14902	3.1704	5.19483
569	73.9289	67.8652	78.2312	66.3376	75.1375	70.8856	71.9611	34.191	38.2859	36.1631	31.5272	30.6292	34.859	32.2924	31.2126	36.0958	44.3351	72.0496	34.1593	35.759	4.1388	3.17941	5.17591
570	73.9364	67.8763	78.2284	66.4498	75.1818	70.9565	71.984	34.2097	38.3048	36.2627	31.6	30.6422	34.9718	32.3602	31.2551	36.1181	44.3862	72.0876	34.2039	35.8183	4.11322	3.18285	5.17196
571	73.9956	67.9723	78.2639	66.5041	75.2008	71.0692	72.1168	34.3034	38.3694	36.3913	31.7101	30.7776	35.1125	32.4469	31.4141	36.1966	44.5228	72.1604	34.3104	35.9386	4.09453	3.16417	5.17447
572	74.0132	68.0511	78.2491	66.5239	75.2062	71.1046	72.143	34.3182	38.4147	36.3881	31.7304	30.8383	35.1749	32.4736	31.4797	36.2508	44.5626	72.1844	34.3379	35.9883	4.07328	3.15715	5.17034
573	73.9504	68.012	78.2496	66.4493	75.1658	71.05	72.0338	34.3121	38.4287	36.3121	31.7255	30.8035	35.1748	32.4975	31.4588	36.2348	44.5746	72.1301	34.3164	35.9881	4.0903	3.16019	5.17564
574	73.9781	68.0331	78.2713	66.4304	75.2251	71.1099	72.0305	34.26	38.4061	36.2822	31.7096	30.7776	35.1872	32.4988	31.416	36.2339	44.5444	72.1541	34.2871	35.9761	4.1034	3.15862	5.17182
575	73.9507	68.0005	78.2271	66.4128	75.1883	71.0834	71.9679	34.1819	38.3621	36.2013	31.626	30.6944	35.1516	32.4175	31.3145	36.1897	44.3847	72.1187	34.2131	35.8916	4.0968	3.17185	5.14268
576	73.9611	67.8677	78.143	66.4295	75.1552	70.9926	71.9396	34.1388	38.3319	36.144	31.5448	30.6257	35.1584	32.3824	31.2517	36.1802	44.2288	72.0698	34.157	35.8403	4.09529	3.18873	5.09803
577	73.9041	67.8142	78.113	66.3918	75.1282	70.9375	71.9095	34.1163	38.3209	36.1452	31.5269	30.6452	35.1484	32.4224	31.3224	36.1795	44.2382	72.0283	34.1509	35.8622	4.10049	3.18366	5.07961
578	73.9145	67.7884	78.149	66.3914	75.1659	70.8795	71.9176	34.0623	38.2876	36.1914	31.5183	30.6516	35.149	32.4267	31.3861	36.1605	44.3026	72.0295	34.1422	35.885	4.12207	3.18037	5.09101
579	74.028	67.8408	78.1669	66.4488	75.2506	70.9517	71.9754	34.0591	38.3496	36.2436	31.5146	30.7065	35.1764	32.4408	31.46	36.179	44.3675	72.0946	34.1747	35.9247	4.12031	3.19484	5.09845
580	74.1094	67.867	78.2042	66.4936	75.2844	71.0653	72.062	34.1316	38.4347	36.2892	31.5326	30.7747	35.2225	32.426	31.5643	36.2203	44.4194	72.1551	34.2326	35.9705	4.11987	3.2072	5.09862
581	74.1446	67.8845	78.3226	66.5467	75.2947	71.1834	72.1471	34.1301	38.506	36.3026	31.5857	30.7964	35.3054	32.4072	31.6129	36.2074	44.4417	72.2177	34.2642	35.9949	4.13244	3.21582	5.09761
582	74.1722	67.9281	78.312	66.5746	75.2952	71.2155	72.1995	34.0908	38.5062	36.2626	31.5853	30.7798	35.3708	32.4329	31.6235	36.2237	44.4041	72.2424	34.2449	36.011	4.11658	3.21457	5.07327
583	74.0778	67.9329	78.2331	66.5871	75.2536	71.1347	72.0951	34.0858	38.4173	36.2345	31.5482	30.7736	35.378	32.4193	31.663	36.2076	44.3881	72.1878	34.2119	36.0112	4.08466	3.1902	5.06015
584	74.0382	67.9243	78.1723	66.5967	75.2717	71.0021	72.0579	34.1136	38.3821	36.2291	31.5828	30.7432	35.3835	32.3827	31.7142	36.2107	44.3535	72.1519	34.2102	36.0089	4.07431	3.17858	5.04128
585	74.0769	67.9115	78.2218	66.6453	75.3047	70.9706	72.1089	34.145	38.4652	36.2653	31.6214	30.7184	35.4564	32.3993	31.759	36.2814	44.2987	72.1771	34.2431	36.039	4.08628	3.21021	5.00466
586	74.0442	67.8803	78.2198	66.5692	75.237	70.9849	72.0504	34.1273	38.5063	36.2775	31.5779	30.7387	35.4634	32.4093	31.7758	36.2737	44.2599	72.1408	34.2455	36.0364	4.0968	3.22921	4.98295
587	74.0692	67.9652	78.3081	66.61	75.2894	71.058	72.1025	34.1845	38.541	36.3413	31.5913	30.7581	35.4782	32.4985	31.8304	36.3335	44.2938	72.2003	34.2832	36.0869	4.09964	3.24218	4.96938
588	74.0618	67.9717	78.3007	66.5836	75.294	71.0821	72.1468	34.2235	38.5034	36.3707	31.5811	30.7252	35.5207	32.5579	31.8502	36.3412	44.2651	72.2058	34.2808	36.107	4.10147	3.24546	4.9414
589	74.0846	67.9842	78.3653	66.65	75.3569	71.1934	72.2929	34.2915	38.4916	36.3798	31.5816	30.7459	35.5774	32.5977	31.8757	36.3499	44.2503	72.2753	34.2981	36.1302	4.1046	3.23715	4.92111
590	74.0329	67.9694	78.3848	66.6536	75.3643	71.2137	72.3481	34.3053	38.4039	36.3593	31.5999	30.7818	35.5828	32.5772	31.879	36.3797	44.2854	72.281	34.29	36.1408	4.10758	3.19181	4.93875
591	74.0354	67.9869	78.3948	66.6973	75.4437	71.1684	72.3378	34.3506	38.3903	36.3603	31.5969	30.8129	35.5932	32.6523	31.9799	36.427	44.3377	72.2949	34.3022	36.198	4.10926	3.1798	4.92538
592	74.0479	68.0275	78.4328	66.6975	75.5077	71.1525	72.3579	34.3568	38.4175	36.3914	31.6029	30.8486	35.6806	32.6648	32.0577	36.436	44.3767	72.3177	34.3234	36.2432	4.12141	3.18256	4.92013
593	74.0519	68.0657	78.3662	66.7249	75.4319	71.1091	72.3546	34.381	38.5448	36.4289	31.671	30.874	35.7353	32.675	32.1113	36.4968	44.4009	72.3006	34.3799	36.2839	4.08471	3.20836	4.91596
594	74.0253	68.0722	78.2834	66.7011	75.3194	71.0952	72.3211	34.3694	38.539	36.4158	31.6659	30.8735	35.6806	32.7021	32.1421	36.4725	44.2914	72.2597	34.3727	36.2577	4.05292	3.2056	4.86055
595	74.0485	68.1305	78.3661	66.7451	75.3112	71.0714	72.3424	34.3752	38.5469	36.4142	31.6114	30.8812	35.6736	32.6706	32.2125	36.453	44.245	72.2879	34.3658	36.2509	4.05533	3.21741	4.83236
596	74.0658	68.1867	78.4522	66.829	75.3942	71.0822	72.3631	34.3687	38.5654	36.4467	31.6152	30.9076	35.7411	32.6915	32.2273	36.4352	44.2826	72.339	34.3807	36.2755	4.05933	3.22066	4.83885
597	74.1428	68.173	78.546	66.8692	75.4998	71.1658	72.4495	34.3867	38.582	36.4722	31.6497	30.9405	35.7981	32.7156	32.3112	36.458	44.2907	72.4066	34.4062	36.3147	4.09068	3.21385	4.81886
598	74.1654	68.1597	78.497	66.8446	75.5034	71.1779	72.4406	34.3715	38.4511	36.4309	31.6471	30.9634	35.7928	32.7182	32.324	36.5115	44.2935	72.3984	34.3728	36.328	4.08776	3.15918	4.81747
599	74.1665	68.2223	78.4799	66.8391	75.5305	71.2411	72.4793	34.339	38.4106	36.4268	31.6567	30.9331	35.8242	32.6871	32.3322	36.5278	44.3215	72.4227	34.3532	36.3386	4.07448	3.15162	4.83249
600	74.1873	68.232	78.3713	66.8668	75.5217	71.2561	72.5164	34.3438	38.4492	36.4162	31.6046	30.8955	35.8533	32.6553	32.317	36.5277	44.3522	72.4217	34.3419	36.3411	4.03945	3.18367	4.85358
601	74.2201	68.1527	78.4381	66.8367	75.4269	71.2127	72.4681	34.3554	38.456	36.3654	31.564	30.8968	35.8464	32.6566	32.3534	36.5168	44.2692	72.3936	34.3275	36.3285	4.06894	3.1861	4.81162
602	74.2092	68.0655	78.3902	66.8065	75.4532	71.1115	72.4409	34.3377	38.5128	36.3676	31.5593	30.8821	35.7975	32.6374	32.4373	36.4898	44.2017	72.3539	34.3319	36.3127	4.08656	3.20985	4.77126
603	74.1859	68.0511	78.3332	66.7167	75.4273	71.0411	72.4263	34.3472	38.5762	36.39	31.5878	30.8741	35.8111	32.5837	32.5016	36.4467	44.1562	72.3117	34.3551	36.2999	4.09395	3.23009	4.74919
604	74.1177	67.9868	78.3945	66.6626	75.2803	70.9445	72.3476	34.336	38.57	36.3674	31.6044	30.8464	35.8321	32.5246	32.5235	36.4022	44.1018	72.2477	34.3448	36.2768	4.11367	3.22846	4.73314
605	74.2457	68.1061	78.4215	66.788	75.3727	71.0346	72.4088	34.3895	38.5586	36.3801	31.6787	30.9226	35.9308	32.4979	32.6353	36.4862	44.1412	72.3396	34.3859	36.3383	4.08805	3.19028	4.73112
606	74.2053	68.1337	78.4129	66.8676	75.4552	70.9834	72.4239	34.376	38.5386	36.4428	31.7032	30.9746	35.9229	32.5329	32.7271	36.5192	44.128	72.3546	34.407	36.366	4.07329	3.17441	4.70114
607	74.1448	68.1434	78.4819	66.884	75.5001	71.002	72.4387	34.3979	38.5465	36.5156	31.709	31.0132	35.9678	32.6431	32.8157	36.5976	44.1968	72.3707	34.4364	36.4442	4.08532	3.17705	4.68955
608	74.1924	68.1796	78.5425	66.9602	75.4725	71.0432	72.4288	34.4422	38.5326	36.526	31.6998	31.0484	36.0198	32.6608	32.8413	36.6364	44.2652	72.4027	34.4498	36.4847	4.07489	3.1667	4.70829
609	74.2162	68.1988	78.5341	66.9832	75.4618	71.0271	72.429	34.4284	38.4842	36.4859	31.6614	31.0281	36.0155	32.6538	32.7875	36.5921	44.2658	72.4072	34.4176	36.4629	4.06566	3.15834	4.72017
610	74.1607	68.1436	78.5147	66.9549	75.4969	71.0855	72.508	34.3684	38.4342	36.4028	31.6673	30.931	36.0387	32.6272	32.7529	36.564	44.2182	72.4092	34.3607	36.4402	4.07401	3.1536	4.71193
611	74.1773	68.1185	78.4484	66.9405	75.455	71.106	72.4785	34.3196	38.3545	36.4	31.641	30.8623	36.016	32.5591	32.7583	36.5695	44.1736	72.3892	34.3155	36.4153	4.05981	3.15183	4.70687
612	74.2283	68.1408	78.5072	67.0119	75.457	71.123	72.4336	34.3181	38.3207	36.4678	31.5941	30.9165	36.021	32.5072	32.7497	36.6037	44.135	72.4145	34.3234	36.4033	4.05768	3.14773	4.70356
613	74.3088	68.1752	78.5939	66.9884	75.493	71.0638	72.4879	34.3201	38.3723	36.4819	31.6246	30.9208	36.0549	32.5163	32.7669	36.638	44.0474	72.4444	34.3439	36.4047	4.09244	3.15879	4.66211
614	74.3827	68.1675	78.6061	66.9724	75.5113	71.05	72.4922	34.3635	38.4321	36.5278	31.671	30.9128	36.058	32.5012	32.8366	36.618	44.0287	72.4546	34.3814	36.4085	4.10914	3.17777	4.6438
615	74.3659	68.1781	78.5232	66.9866	75.5711	71.0754	72.5212	34.3982	38.4313	36.5743	31.7103	30.9435	36.0578	32.5604	32.963	36.6561	44.0219	72.4602	34.4115	36.4518	4.08835	3.1686	4.60484
616	74.3552	68.2297	78.5206	66.9868	75.5148	70.9872	72.5426	34.3922	38.3972	36.5788	31.6626	30.9792	36.0317	32.4805	33.0266	36.6334	43.9904	72.4481	34.402	36.4325	4.07596	3.15912	4.59732
617	74.3906	68.2527	78.6212	66.983	75.5481	70.9659	72.5658	34.433	38.4085	36.562	31.6708	31.0279	36.0284	32.4883	33.1061	36.6376	44.0603	72.4753	34.4204	36.4641	4.10619	3.14487	4.60992
618	74.4094	68.3264	78.7839	67.1459	75.7207	71.1205	72.673	34.5516	38.4725	36.6571	31.7534	31.07	36.1061	32.5672	33.2522	36.7416	44.1829	72.5971	34.5009	36.57	4.11214	3.15219	4.61603
619	74.5442	68.3731	78.9161	67.2539	75.8211	71.3251	72.8373	34.6678	38.5717	36.7352	31.8653	31.1593	36.189	32.6459	33.4626	36.8886	44.2995	72.7244	34.5999	36.6971	4.12451	3.14861	4.60884
620	74.6472	68.4947	78.9097	67.3593	75.8794	71.4005	72.869	34.7252	38.6913	36.7942	31.8988	31.2893	36.2807	32.7367	33.6454	36.9874	44.4155	72.7943	34.6798	36.8131	4.08908	3.15414	4.60331
621	74.7342	68.5762	78.9141	67.4693	75.9317	71.3422	72.8649	34.8228	38.6781	36.8841	31.9319	31.3857	36.362	32.7905	33.7923	37.0842	44.4904	72.8332	34.7405	36.9039	4.06836	3.13247	4.59574
622	74.8293	68.6574	78.9924	67.5038	75.9842	71.4324	72.9081	35.0007	38.7469	36.9759	32.0645	31.4633	36.4475	32.8919	33.9289	37.2347	44.5629	72.9011	34.8503	37.0132	4.07481	3.12077	4.57889
623	74.8441	68.6647	79.0925	67.5481	76.0438	71.5348	72.9057	35.1018	38.8271	37.0237	32.1458	31.5625	36.5237	33.0059	33.9613	37.3025	44.628	72.9477	34.9322	37.0843	4.09143	3.11016	4.57318
624	74.8298	68.6457	79.0495	67.5589	76.0783	71.5812	72.9371	35.0637	38.9317	37.0501	32.1549	31.5615	36.5403	33.0192	34.0119	37.3079	44.6432	72.9544	34.9524	37.1045	4.08225	3.1453	4.56743
625	74.8214	68.6153	79.0015	67.4878	75.9851	71.5557	72.9905	35.0559	39.0199	37.0991	32.1733	31.5714	36.551	33.0297	34.1191	37.3034	44.5624	72.9225	34.9839	37.1131	4.08045	3.17463	4.51338
626	74.855	68.6107	79.0443	67.4459	75.9084	71.4414	72.9584	35.0447	39.0471	37.1064	32.2061	31.5204	36.4713	33.0061	34.0816	37.2598	44.4118	72.8949	34.9849	37.0461	4.10083	3.19101	4.46485
627	74.8927	68.6208	79.1294	67.4472	76.0275	71.486	72.9849	35.0699	39.0177	37.104	32.219	31.5221	36.4886	33.0213	34.0359	37.255	44.3857	72.9412	34.9865	37.0373	4.13515	3.17815	4.45769
628	74.8927	68.6582	79.1151	67.4574	76.0657	71.5426	72.9967	35.0596	38.9769	37.0701	32.1736	31.4364	36.4642	33.012	33.9641	37.2369	44.3925	72.9612	34.9433	37.0139	4.12433	3.19282	4.47527
629	74.8229	68.6718	79.0686	67.3533	76.0126	71.5202	72.992	34.9932	38.8764	37.0071	32.0517	31.3745	36.363	33.0114	33.867	37.1227	44.4158	72.9202	34.8606	36.956	4.12291	3.19353	4.50361
630	74.6703	68.5637	79.0761	67.3136	75.9123	71.4655	73.0136	34.9504	38.7693	36.8845	31.9354	31.3106	36.239	32.9496	33.7783	37.076	44.3377	72.8593	34.77	36.8761	4.13164	3.182	4.50375
631	74.6279	68.5067	79.0363	67.3927	75.8202	71.3855	72.915	34.8507	38.7065	36.8181	31.8244	31.1502	36.1536	32.8744	33.6826	37.0179	44.1976	72.812	34.67	36.7852	4.10363	3.21818	4.48099
632	74.8072	68.6362	79.0608	67.5419	75.9711	71.5063	73.0309	34.8618	38.7988	36.8393	31.8758	31.173	36.1427	32.8648	33.7023	37.056	44.2077	72.9363	34.7097	36.7947	4.07971	3.23335	4.48478
633	74.8749	68.6069	79.0902	67.6149	76.0577	71.6451	73.0086	34.8653	38.9399	36.9214	32.0113	31.2908	36.1507	32.943	33.8001	37.0976	44.227	72.9855	34.8057	36.8437	4.08428	3.23011	4.45917
634	74.8609	68.5747	79.0551	67.638	76.0559	71.6297	73.0435	34.8978	39.0275	36.9652	32.0926	31.3518	36.129	33.0911	33.9015	37.1665	44.2381	72.9797	34.867	36.9052	4.07588	3.23137	4.41621
635	74.8497	68.6455	79.0747	67.6042	76.0578	71.576	73.117	34.921	39.0296	36.9849	32.1145	31.3909	36.1951	33.142	33.9428	37.1654	44.3258	72.9893	34.8882	36.9542	4.0782	3.21997	4.43178
636	74.9117	68.7232	79.1544	67.6149	76.0503	71.5969	73.1442	35.0208	38.9983	37.0273	32.0821	31.448	36.287	33.1781	34.008	37.2213	44.3893	73.0279	34.9153	37.0167	4.08473	3.20904	4.43612
637	74.933	68.6858	79.0516	67.6421	76.0086	71.5676	73.1316	34.9865	39.0205	37.0263	32.0499	31.4538	36.2646	33.1483	34.0553	37.2463	44.2811	73.0029	34.9074	36.9991	4.05788	3.22127	4.39098
638	74.8823	68.7127	78.9765	67.5906	76.0237	71.5457	73.0575	34.9538	39.1051	37.0109	32.1434	31.442	36.3196	33.1797	34.1119	37.274	44.292	72.9699	34.931	37.0354	4.04473	3.22852	4.37724
639	74.9266	68.8565	79.0445	67.6247	76.1434	71.6248	73.1403	35.0343	39.2041	37.1439	32.2524	31.5376	36.4266	33.376	34.2735	37.4103	44.4887	73.0515	35.0345	37.195	4.04317	3.23278	4.38619
640	74.973	68.8659	79.1633	67.6897	76.1434	71.765	73.2831	35.1325	39.2684	37.1809	32.2819	31.6503	36.4431	33.4683	34.385	37.4778	44.5682	73.1262	35.1028	37.2685	4.05265	3.22292	4.38083
641	75.021	68.923	79.251	67.793	76.21	71.8737	73.4049	35.1671	39.3447	37.2044	32.347	31.6081	36.4131	33.479	34.4154	37.5104	44.4967	73.2109	35.1343	37.2629	4.04803	3.24873	4.34561
642	75.1738	69.0534	79.3226	67.8628	76.3273	71.945	73.4836	35.2259	39.4871	37.2746	32.449	31.6621	36.4474	33.5213	34.4212	37.5459	44.609	73.3098	35.2197	37.309	4.04996	3.26981	4.38105
643	75.2965	69.1014	79.4078	67.9469	76.4372	72.0552	73.5176	35.2961	39.4956	37.4125	32.5	31.7729	36.523	33.5998	34.4975	37.5931	44.6395	73.3947	35.2954	37.3706	4.06102	3.25369	4.36115
644	75.3143	69.0609	79.3052	67.9898	76.4279	72.0461	73.5042	35.3368	39.4526	37.4592	32.4558	31.8235	36.52	33.7161	34.5515	37.6341	44.6665	73.3783	35.3056	37.4176	4.03408	3.24357	4.3392
645	75.3128	69.0253	79.2236	67.9772	76.3729	71.9841	73.3825	35.2948	39.4261	37.3724	32.4154	31.7786	36.4621	33.7206	34.5736	37.6317	44.6386	73.3255	35.2575	37.4053	4.01917	3.24159	4.326
646	75.2839	68.9226	79.2036	67.9905	76.375	71.9148	73.3677	35.2272	39.4889	37.2999	32.3534	31.7577	36.4494	33.7853	34.6805	37.6045	44.6078	73.294	35.2254	37.4255	4.03153	3.26934	4.28242
647	75.3582	68.9177	79.2931	68.1026	76.4395	72.0015	73.4552	35.2575	39.63	37.3646	32.4664	31.7997	36.4996	33.9587	34.8523	37.7023	44.6518	73.3668	35.3036	37.5329	4.03952	3.28993	4.23485
648	75.4699	68.9564	79.3127	68.0901	76.4135	72.0426	73.4213	35.3139	39.6378	37.4577	32.5005	31.8374	36.5982	34.0485	34.8747	37.7243	44.5963	73.3866	35.3495	37.5684	4.04368	3.28964	4.18338
649	75.4029	69.0168	79.345	67.9942	76.4361	72.0788	73.2998	35.3601	39.713	37.5221	32.5364	31.9139	36.7214	34.0475	34.9298	37.74	44.6481	73.3677	35.4091	37.6174	4.05701	3.29619	4.18975
650	75.4534	69.0816	79.5051	68.0909	76.4779	72.1341	73.4112	35.4056	39.8022	37.5885	32.5661	32.0087	36.8219	34.0867	35.0877	37.872	44.7054	73.4506	35.4742	37.7147	4.06985	3.30429	4.17598
651	75.4289	69.1423	79.4916	68.2004	76.5642	72.1979	73.4413	35.4934	39.8201	37.598	32.5891	32.0629	36.8409	34.176	35.1437	37.9994	44.8216	73.4952	35.5127	37.7963	4.03698	3.29208	4.19678
652	75.5129	69.2654	79.5041	68.2286	76.6972	72.4095	73.6711	35.5233	39.8305	37.6376	32.618	32.078	36.8571	34.3041	35.18	38.0397	44.9151	73.6127	35.5375	37.8592	4.02435	3.29136	4.20236
653	75.552	69.3973	79.5244	68.2052	76.774	72.4978	73.7215	35.5111	39.81	37.6664	32.6364	32.0968	36.8523	34.367	35.2264	38.105	45.0063	73.6675	35.5441	37.9114	4.01969	3.28031	4.22104
654	75.6528	69.3301	79.5192	68.1848	76.7645	72.404	73.7213	35.518	39.7917	37.6353	32.7249	32.1281	36.8875	34.3709	35.1814	38.1486	44.9914	73.6538	35.5596	37.916	4.04653	3.24159	4.21957
655	75.6969	69.3286	79.4683	68.1879	76.624	72.3399	73.7654	35.5021	39.7959	37.5626	32.71	32.031	36.7515	34.2811	35.0757	38.0814	44.8451	73.6301	35.5203	37.807	4.02333	3.26056	4.20167
656	75.6393	69.2546	79.4516	68.2092	76.6396	72.3555	73.9212	35.4233	39.9016	37.5323	32.7396	31.9971	36.7838	34.2598	35.1782	38.004	44.7764	73.6387	35.5188	37.8004	4.02542	3.29388	4.15786
657	75.6032	69.2872	79.5159	68.1917	76.7917	72.4735	74.0125	35.4602	40.0387	37.5869	32.7639	32.0851	36.8553	34.2909	35.3297	38.0572	44.7603	73.6965	35.587	37.8587	4.05013	3.31913	4.11714
658	75.7295	69.3542	79.6704	68.3018	76.9018	72.5503	74.1174	35.5187	40.1919	37.726	32.8769	32.2271	36.9162	34.4001	35.5023	38.1223	44.911	73.8036	35.7081	37.9704	4.07152	3.32961	4.1275
659	75.6331	69.2785	79.7148	68.2519	76.793	72.5262	74.051	35.6157	40.1577	37.7633	32.9124	32.2419	36.9121	34.5261	35.5949	38.1536	44.9674	73.7498	35.7382	38.0308	4.08649	3.31124	4.11095
660	75.6493	69.3035	79.7032	68.2935	76.687	72.5248	74.0768	35.6302	40.0984	37.7565	32.8906	32.3294	36.9742	34.5927	35.6754	38.1523	44.907	73.7483	35.741	38.0603	4.05846	3.27205	4.05516
661	75.6216	69.4392	79.7358	68.2746	76.6945	72.5943	74.0501	35.6588	40.1003	37.727	32.8213	32.2689	36.9693	34.6035	35.6182	38.1359	44.8113	73.7729	35.7153	38.0276	4.0412	3.29891	4.02119
662	75.7469	69.5367	79.7551	68.3033	76.7225	72.5874	74.2196	35.6727	40.1204	37.6935	32.8381	32.2293	36.9078	34.6678	35.678	38.1743	44.8779	73.8388	35.7108	38.0612	4.03774	3.3072	4.03129
663	75.6964	69.4241	79.6543	68.3516	76.6822	72.4867	74.1339	35.6672	40.1123	37.6767	32.7882	32.2395	36.8175	34.6085	35.6555	38.1601	44.8832	73.7756	35.6968	38.025	4.0175	3.31023	4.05581
664	75.6978	69.4825	79.7163	68.4814	76.8904	72.5198	74.186	35.7497	40.2032	37.741	32.8841	32.3076	36.8198	34.6879	35.7208	38.1805	44.9322	73.8535	35.7771	38.0682	4.01769	3.31115	4.05038
665	75.6533	69.4305	79.6244	68.4557	76.8934	72.4829	74.0807	35.7902	40.3018	37.7677	32.8557	32.3036	36.8629	34.6581	35.6782	38.2298	44.8602	73.803	35.8038	38.0578	4.00822	3.35529	4.02959
666	75.6918	69.3612	79.6299	68.3587	76.7617	72.5574	74.0911	35.7802	40.3524	37.7748	32.8155	32.304	36.8525	34.6515	35.7321	38.3442	44.8774	73.7788	35.8054	38.0915	4.02647	3.38207	4.03261
667	75.6889	69.4256	79.5987	68.4041	76.8416	72.5853	74.0644	35.8537	40.3993	37.7513	32.8931	32.3463	36.9913	34.72	35.9431	38.404	44.9415	73.8012	35.8487	38.2	4.00501	3.36639	4.00482
668	75.8156	69.4875	79.7143	68.4819	76.9206	72.634	74.1899	35.9297	40.383	37.8267	32.9931	32.3917	37.096	34.8353	36.0737	38.4483	45.0577	73.892	35.9048	38.3022	4.0231	3.33798	4.00308
669	75.9243	69.6084	79.8565	68.5852	77.0115	72.6811	74.1639	35.9799	40.3475	37.927	32.9716	32.438	37.0478	34.86	36.1178	38.4721	45.1241	73.9758	35.9328	38.3244	4.02987	3.33358	4.02364
670	75.9904	69.7014	79.9203	68.7635	77.0731	72.7651	74.3089	35.9644	40.3948	38.0455	33.0533	32.5206	37.0172	34.8945	36.1866	38.5425	45.0929	74.0747	35.9957	38.3467	3.99866	3.32749	3.9969
671	76.0063	69.6902	79.9084	68.7675	77.0972	72.8102	74.317	35.9507	40.4289	38.1657	33.0857	32.5757	37.044	34.8943	36.2415	38.6527	45.0856	74.0853	36.0413	38.3836	3.99887	3.3361	3.98584
672	75.9831	69.7526	79.9598	68.646	77.0235	72.7638	74.337	35.9625	40.4277	38.1097	33.1194	32.4837	37.0997	34.8871	36.2301	38.5694	45.0218	74.0665	36.0206	38.3616	4.01891	3.34353	3.9563
673	76.0053	69.7607	80.0316	68.6239	76.9843	72.7949	74.2781	35.9922	40.4805	38.0357	33.0724	32.4387	37.0467	34.8825	36.1325	38.5397	44.9725	74.0684	36.0039	38.3148	4.03482	3.37167	3.95369
674	76.0663	69.6908	80.0408	68.6728	77.1469	72.783	74.4384	36.177	40.5177	38.0698	33.1758	32.4932	37.1408	34.9539	36.2299	38.6649	45.1371	74.1199	36.0867	38.4253	4.06581	3.35265	3.9883
675	76.2728	69.7016	80.0686	68.6973	77.284	72.9025	74.5564	36.2661	40.604	38.2754	33.2676	32.645	37.1443	34.9719	36.3976	38.7884	45.2138	74.2119	36.2116	38.5032	4.09416	3.35198	3.99574
676	76.3856	69.7652	80.1219	68.7835	77.2678	73.0224	74.5221	36.2854	40.6575	38.4663	33.3466	32.6786	37.1789	35.0834	36.637	38.838	45.268	74.2669	36.2869	38.6011	4.07681	3.37332	3.961
677	76.3642	69.886	80.0164	68.8618	77.2015	72.9769	74.5893	36.2602	40.6331	38.4086	33.3332	32.7198	37.262	35.1516	36.6836	38.8308	45.3828	74.2709	36.271	38.6622	4.00505	3.3481	3.98104
678	76.3669	70.0911	79.9862	68.9369	77.3993	72.9588	74.6296	36.3691	40.7168	38.4234	33.4412	32.8263	37.43	35.2506	36.7436	39.0406	45.4257	74.3384	36.3554	38.7781	3.97042	3.32587	3.95788
679	76.4956	70.0703	80.126	68.9808	77.5713	73.0674	74.7287	36.4447	40.7259	38.4555	33.5217	32.9985	37.3994	35.2182	36.8601	39.1447	45.3581	74.4343	36.4293	38.7961	4.02545	3.27074	3.92688
680	76.6711	70.0167	80.1922	69.1511	77.6395	73.1511	74.802	36.5974	40.8825	38.5635	33.6599	33.084	37.4535	35.3581	36.9815	39.1521	45.3725	74.5177	36.5575	38.8635	4.033	3.28605	3.88163
681	76.5773	69.9718	80.0838	69.0807	77.4709	73.0779	74.7548	36.5687	40.8692	38.5542	33.5932	33.0898	37.4792	35.3438	36.9604	39.0239	45.2178	74.431	36.535	38.805	4.00516	3.29345	3.81812
682	76.436	69.984	80.0783	69.0305	77.4853	72.9084	74.7138	36.5153	40.7037	38.4393	33.45	33.0083	37.5627	35.2105	36.8417	38.9559	45.0379	74.3766	36.4233	38.7217	4.01164	3.2748	3.78006
683	76.408	70.0086	80.0671	69.0872	77.533	72.9474	74.7804	36.5057	40.6635	38.4185	33.4314	32.9582	37.4348	35.2156	36.836	39.0825	45.003	74.4045	36.3955	38.7144	3.99434	3.27572	3.77787
684	76.338	70.0342	80.0247	69.121	77.4187	72.9106	74.6244	36.5658	40.6377	38.4718	33.4651	32.9342	37.4038	35.2816	36.8451	39.1305	45.1024	74.3531	36.4149	38.7527	3.95152	3.27499	3.80685
685	76.4819	70.2049	80.1557	69.2547	77.5477	73.0497	74.7494	36.6183	40.5933	38.6122	33.6359	33.113	37.5402	35.3849	37.0088	39.2703	45.3015	74.492	36.5145	38.9011	3.94397	3.19782	3.83725
686	76.3711	70.1602	80.1725	69.1369	77.5051	73.1042	74.8041	36.6101	40.5909	38.646	33.7533	33.2219	37.5422	35.4251	37.0345	39.3877	45.2915	74.4649	36.5644	38.9362	3.96522	3.14732	3.82365
687	76.2965	70.1239	80.0359	69.0439	77.4417	73.1882	74.6379	36.6165	40.6348	38.6587	33.6551	33.1736	37.4562	35.3796	36.9769	39.3943	45.2371	74.3954	36.5477	38.8888	3.93933	3.19832	3.82683
688	76.2938	70.1372	79.9097	68.9987	77.4904	73.1058	74.673	36.7006	40.6272	38.6846	33.6076	33.1482	37.4694	35.3757	37.0045	39.4164	45.2994	74.3727	36.5536	38.9131	3.92818	3.21841	3.84962
689	76.3379	70.0652	79.9058	69.0057	77.4993	73.1818	74.7072	36.7478	40.6298	38.6656	33.6424	33.1185	37.4493	35.4824	37.0601	39.3521	45.2903	74.3861	36.5608	38.9268	3.93999	3.21669	3.81466
690	76.3573	70.2129	80.1548	69.1279	77.6258	73.3665	74.737	36.8612	40.7313	38.6867	33.781	33.23	37.4898	35.6445	37.205	39.4487	45.3579	74.5117	36.658	39.0292	3.95339	3.19284	3.78755
691	76.525	70.4165	80.313	69.3371	77.6897	73.5129	74.9489	37.0662	40.8956	38.8587	33.9131	33.3134	37.6207	35.7863	37.4362	39.6499	45.5295	74.6776	36.8094	39.2045	3.92325	3.22386	3.79221
692	76.6182	70.4198	80.3184	69.3783	77.818	73.5236	74.9311	37.1548	40.9347	38.9255	33.9722	33.4262	37.6697	35.8004	37.4689	39.6402	45.6338	74.7153	36.8827	39.2426	3.93794	3.20485	3.82342
693	76.5095	70.382	80.3907	69.3931	77.8854	73.4335	74.8889	37.1123	40.8826	39.0339	34.0631	33.6224	37.7542	35.8579	37.5485	39.7592	45.6954	74.6976	36.9429	39.323	3.96344	3.13214	3.82147
694	76.4573	70.4725	80.2958	69.3668	77.6544	73.5181	74.8346	37.1168	40.846	38.8974	33.9547	33.5526	37.8242	35.8647	37.5321	39.759	45.7588	74.6571	36.8735	39.3478	3.89115	3.14181	3.84123
695	76.427	70.5296	80.1359	69.4164	77.5622	73.4391	74.9249	37.1533	40.8801	38.8247	33.9873	33.4446	37.8129	35.8998	37.5628	39.7146	45.7648	74.6336	36.858	39.351	3.82191	3.16325	3.83221
696	76.4364	70.4197	80.0503	69.3627	77.6179	73.3752	75.0024	37.0883	40.9355	38.9326	33.9681	33.4292	37.8177	35.9377	37.5403	39.5973	45.6747	74.6092	36.8707	39.3135	3.84603	3.20509	3.7856
697	76.4665	70.3923	80.1946	69.3801	77.7192	73.4302	75.1193	36.9826	40.8748	39.0109	33.9961	33.448	37.7775	36.0463	37.5252	39.6064	45.6672	74.6717	36.8625	39.3245	3.89587	3.18605	3.76453
698	76.527	70.4077	80.2643	69.4496	77.8519	73.5099	75.2545	37.0543	41.0537	38.9987	34.0427	33.6161	37.9265	36.0264	37.6109	39.7124	45.7287	74.7521	36.9531	39.401	3.91427	3.18652	3.77171
699	76.7195	70.5068	80.3187	69.4655	77.9416	73.7195	75.3055	37.1614	41.101	39.1757	34.0993	33.6487	37.8689	36.0544	37.6801	39.6788	45.9157	74.8539	37.0372	39.4396	3.92219	3.20999	3.84121
700	76.7924	70.4743	80.3001	69.4003	77.8537	73.7819	75.3192	37.1167	41.0585	39.2154	34.1345	33.6384	37.9013	36.0496	37.7052	39.6806	45.9284	74.846	37.0327	39.453	3.93077	3.19762	3.84149
701	76.8447	70.5316	80.4067	69.4176	77.7425	73.7469	75.167	37.157	41.1134	39.1944	34.2446	33.6948	38.0366	36.1905	37.6619	39.7458	45.9577	74.8367	37.0808	39.5185	3.9306	3.17191	3.81555
702	76.8233	70.4283	80.5034	69.5298	77.7804	73.6854	75.3353	37.152	41.3021	39.1463	34.309	33.8518	38.1205	36.3174	37.67	39.8569	45.9717	74.8694	37.1522	39.5873	3.95574	3.16917	3.78659
703	76.7991	70.396	80.5842	69.5916	77.9323	73.7409	75.5017	37.182	41.3783	39.2809	34.3565	33.9563	38.1103	36.4594	37.7881	39.9044	46.0582	74.9351	37.2308	39.6641	3.98484	3.1777	3.77975
704	76.8556	70.4362	80.7133	69.6524	78.1662	73.7959	75.4897	37.2549	41.3737	39.3195	34.2609	34.0103	38.1417	36.5772	37.8169	39.9377	46.1158	75.0156	37.2439	39.7179	4.0254	3.19053	3.77305
705	76.7958	70.4209	80.6471	69.5822	78.2299	73.715	75.3287	37.1582	41.2361	39.2358	34.2142	34.1058	38.1547	36.5419	37.7207	39.9994	46.0212	74.9599	37.19	39.6876	4.03352	3.11949	3.75252
706	76.8491	70.3728	80.5114	69.5323	78.0286	73.6745	75.328	37.2719	41.2341	39.2012	34.3082	34.0676	38.272	36.4921	37.7947	39.9756	45.9692	74.8995	37.2166	39.7007	4.00141	3.10069	3.7195
707	77.0421	70.458	80.6224	69.7044	78.0826	73.8233	75.4745	37.5173	41.3522	39.3835	34.4409	34.0057	38.2734	36.7149	37.9638	39.9546	46.1462	75.0296	37.3399	39.8106	3.99084	3.15545	3.72551
708	77.1899	70.7872	80.8352	69.9982	78.3457	74.1453	75.7456	37.6868	41.557	39.672	34.7351	34.2643	38.4666	36.8967	38.2464	40.1918	46.5142	75.2924	37.583	40.0631	3.94741	3.13415	3.79172
709	77.2351	70.9743	80.8859	70.0804	78.3407	74.1316	75.7917	37.8242	41.6175	39.7207	34.7927	34.4112	38.5606	36.9453	38.4206	40.3297	46.622	75.3485	37.6733	40.1756	3.91022	3.11089	3.79812
710	77.3564	71.0577	80.7961	70.0411	78.2219	74.2099	75.7202	37.8116	41.69	39.6744	34.777	34.5786	38.581	36.9454	38.4425	40.4723	46.6235	75.3433	37.7063	40.2129	3.87252	3.08698	3.79595
711	77.2477	70.9544	80.6601	70.0124	78.2272	74.1677	75.6502	37.7775	41.5172	39.6207	34.874	34.4913	38.5953	36.9559	38.4218	40.5301	46.4847	75.2742	37.6561	40.1976	3.85866	3.02236	3.73723
712	77.1576	71.1181	80.5802	70.0442	78.2204	74.0763	75.73	37.742	41.4247	39.6341	34.9054	34.4927	38.6094	37.1193	38.4244	40.4774	46.506	75.2753	37.6398	40.2273	3.80021	2.98724	3.70852
713	77.2886	71.1463	80.6038	69.9068	78.2728	74.1382	75.6978	37.7017	41.4818	39.6438	34.8802	34.5882	38.5495	37.1771	38.577	40.5809	46.6082	75.2935	37.6591	40.2985	3.84643	2.98775	3.73021
714	77.3062	71.073	80.793	69.8952	78.2895	74.1439	75.8003	37.7815	41.626	39.6871	34.965	34.7118	38.5441	37.2593	38.7427	40.8116	46.6919	75.3287	37.7543	40.4099	3.91143	2.99013	3.73537
715	77.2604	71.1445	80.9589	69.8887	78.2973	74.2265	75.9128	37.9077	41.7313	39.7427	35.0928	34.8293	38.6469	37.4008	38.9318	41.0621	46.7819	75.3842	37.8608	40.5647	3.93444	2.9739	3.7167
716	77.2993	71.2026	80.7365	69.8571	78.493	74.3257	75.8968	38.0364	41.7053	39.8073	35.1917	35.0028	38.796	37.4593	39.07	41.109	46.8722	75.4016	37.9487	40.6613	3.90288	2.90919	3.70945
717	77.4234	71.3152	80.7863	70.1229	78.7626	74.3891	75.9926	38.18	41.8046	40.0478	35.3922	35.1516	39.0736	37.5601	39.1622	41.1052	47.0238	75.5417	38.1152	40.785	3.87684	2.89605	3.70768
718	77.4664	71.4114	80.8913	70.2536	78.7269	74.4598	76.066	38.1866	41.8924	40.056	35.5071	35.1412	39.0105	37.732	39.1992	41.0617	47.0466	75.6108	38.1567	40.81	3.84932	2.90161	3.68326
719	77.4837	71.4248	81.0219	70.1386	78.5777	74.4013	76.0543	38.1453	41.8209	39.9835	35.5652	35.2283	39.1582	37.8924	39.1453	41.1547	47.1955	75.586	38.1486	40.9092	3.8883	2.83085	3.70325
720	77.5329	71.4099	81.1436	70.326	78.7228	74.5987	76.2225	38.3255	41.8999	40.164	35.6246	35.4499	39.3768	38.0133	39.2741	41.2949	47.4892	75.7081	38.2928	41.0897	3.8923	2.8158	3.76465
721	77.5282	71.6865	81.2975	70.5901	78.9791	74.9858	76.3905	38.5844	42.0995	40.5088	35.6775	35.7758	39.5286	38.2063	39.4857	41.3765	47.9145	75.9225	38.5292	41.3023	3.83593	2.84527	3.86516
722	77.5916	71.5836	81.316	70.6964	78.9314	75.1733	76.5658	38.6369	42.1704	40.4777	35.8596	35.7681	39.6444	38.3644	39.5742	41.5615	48.1975	75.9797	38.5825	41.4684	3.83013	2.8197	3.9319
723	77.7436	71.7257	81.3964	70.7816	79.011	75.1746	76.8833	38.8521	42.2681	40.6806	36.0884	35.8631	39.8032	38.6071	39.6487	41.7492	48.4271	76.1023	38.7505	41.6471	3.83225	2.80771	3.95645
724	78.0071	71.932	81.5189	70.8717	79.3105	75.2664	77.1258	38.9551	42.4153	40.8574	36.3614	36.1058	39.9928	38.8299	39.7829	41.9717	48.7792	76.2903	38.939	41.8713	3.86242	2.75845	4.02708
725	78.0232	71.9008	81.4722	70.7932	79.1279	75.2504	76.9948	39.0033	42.5305	40.7678	36.3733	36.2564	39.991	38.7509	39.8607	42.0628	48.7384	76.2232	38.9863	41.8808	3.85009	2.73932	4.01585
726	78.0595	72.0138	81.5225	70.9504	79.0146	75.2688	77.0363	38.8061	42.3506	40.7833	36.3043	36.577	39.988	38.7498	39.8706	42.0695	48.7753	76.2666	38.9643	41.8906	3.79313	2.62562	4.03101
727	78.0401	72.0062	81.5461	71.0219	79.0783	75.386	77.0235	38.8981	42.2195	40.9311	36.403	36.5404	40.0887	38.8022	39.7667	42.03	49.0033	76.3003	38.9984	41.9382	3.78423	2.5932	4.11991
728	78.0635	72.2652	81.5871	71.1008	79.0696	75.4307	76.9847	39.0576	42.4464	41.0021	36.6358	36.5336	40.1814	38.9766	39.8539	42.1535	49.2164	76.3574	39.1351	42.0764	3.72484	2.62063	4.15707
729	78.1983	72.3916	81.684	71.1343	78.9326	75.5709	77.3329	39.23	42.6409	41.145	36.5924	36.6749	40.1593	39.1107	40.1989	42.3547	49.2914	76.4635	39.2566	42.223	3.71692	2.68251	4.12377
730	78.5326	72.3288	81.9155	71.222	79.2316	75.7033	77.5285	39.4743	42.8741	41.4238	36.5927	36.8771	40.3844	39.1259	40.2631	42.4882	49.4218	76.6375	39.4484	42.3367	3.82399	2.75703	4.14253
731	78.4624	72.1888	81.6607	71.2518	79.1521	75.4529	77.169	39.591	42.8032	41.3377	36.5936	36.7932	40.3684	39.0728	40.2215	42.4957	49.4114	76.4768	39.4237	42.314	3.76802	2.7405	4.15558
732	78.4589	72.3529	81.512	71.2988	79.0951	75.5582	76.9186	39.4177	42.7229	41.2495	36.6366	36.7853	40.3502	39.1243	40.3595	42.5994	49.4005	76.4564	39.3624	42.3668	3.67405	2.68927	4.12725
733	78.5279	72.5102	81.4177	71.187	79.224	75.6264	77.0406	39.4463	42.7623	41.3674	36.7979	36.9851	40.4266	39.2416	40.4452	42.5399	49.5583	76.5048	39.4718	42.4423	3.67238	2.63414	4.15159
734	78.4557	72.5673	81.6142	71.2856	79.2445	75.5028	77.1468	39.3948	42.5635	41.3067	36.7173	36.9201	40.4016	39.0207	40.4036	42.5775	49.462	76.5453	39.3805	42.3731	3.68706	2.59751	4.16229
735	78.6615	72.4727	81.7653	71.2375	79.1902	75.587	77.1613	39.3528	42.412	41.1643	36.6425	36.9683	40.4176	38.9703	40.2106	42.5096	49.3998	76.5822	39.308	42.3016	3.75875	2.53287	4.16674
736	78.7867	72.5331	82.0825	71.308	79.2077	75.7249	77.425	39.5898	42.5256	41.4275	36.9272	36.9839	40.5506	39.0967	40.4065	42.7415	49.6665	76.724	39.4908	42.4924	3.81932	2.54102	4.21847
737	78.9335	72.6381	82.253	71.5136	79.5541	75.9276	77.8008	40.088	43.0155	41.7415	37.4385	37.2629	40.7536	39.207	40.7631	42.901	50.0124	76.9458	39.9093	42.7274	3.84607	2.55664	4.27928
738	79.0179	72.7385	82.1405	71.658	79.7834	76.1277	77.9479	40.1442	43.0722	41.7469	37.459	37.4629	40.766	39.1826	40.643	43.0127	50.2232	77.0591	39.977	42.7655	3.7986	2.52001	4.38801
739	78.8782	72.2922	81.875	71.5464	79.4776	76.0762	77.841	39.8658	42.7842	41.4936	37.207	37.3565	40.6403	39.1673	40.5748	42.8555	50.3073	76.8552	39.7414	42.709	3.80243	2.47261	4.44785
740	78.9131	72.4025	82.0974	71.4651	79.5452	76.2871	77.9579	39.9252	42.9706	41.558	37.2425	37.3791	40.7233	39.2354	40.616	42.9842	50.4558	76.9526	39.8151	42.8029	3.85797	2.52781	4.48425
741	78.933	72.5111	82.1028	71.4241	79.6402	76.2032	78.2404	40.0863	43.1211	41.7479	37.479	37.4206	40.9042	39.1547	40.6197	43.1545	50.2706	77.0078	39.971	42.8207	3.87642	2.5401	4.40367
742	78.6774	72.2764	81.7503	71.1525	79.5353	75.9311	77.9811	39.842	42.9766	41.8094	37.5177	37.3011	40.8561	39.1673	40.511	42.9916	50.1214	76.7577	39.8894	42.7295	3.87313	2.52704	4.35401
743	78.6714	72.1835	81.7969	71.1374	79.5784	75.768	77.801	39.9834	42.8821	41.7657	37.5965	37.2723	40.7928	39.1481	40.2601	43.1242	50.0453	76.7052	39.9	42.6741	3.90666	2.4795	4.36854
744	78.7934	72.2907	82.064	71.2387	79.6334	76.1637	77.8843	39.9656	43.116	41.778	37.4775	37.3225	40.8057	39.3772	40.4859	42.8679	50.1649	76.8669	39.9319	42.7403	3.92689	2.56811	4.3381
745	78.8378	72.6375	82.0304	71.3217	79.4809	76.3872	78.0077	40.0627	43.1224	41.722	37.3702	37.2939	40.9368	39.4993	40.6814	42.771	50.2069	76.9576	39.9142	42.8191	3.8186	2.59426	4.29289
746	78.6727	72.4201	81.6171	71.2719	79.1291	75.9495	77.8183	39.791	42.847	41.5434	37.1582	37.2278	40.582	39.1184	40.4293	42.8033	50.2507	76.697	39.7135	42.6367	3.73197	2.5437	4.4574
747	78.5537	72.5335	81.5977	71.3597	79.2443	75.8558	77.6932	39.7989	42.8659	41.5806	37.2152	37.3905	40.5579	39.0614	40.4369	42.9323	50.221	76.6911	39.7702	42.6419	3.68497	2.50263	4.4596
748	78.4281	72.4833	81.7938	71.2597	79.4547	76.1034	77.5737	39.8441	42.7292	41.5017	37.1181	37.3875	40.6464	39.0733	40.2955	42.8743	50.2145	76.7281	39.7161	42.6208	3.76414	2.47263	4.46146
749	78.4123	72.5721	81.9954	71.3523	79.6417	76.3427	77.7512	39.859	42.9112	41.7802	37.1079	37.3995	41.0089	39.0403	40.3565	43.1479	50.1854	76.8668	39.8116	42.7478	3.79258	2.57941	4.41491
750	78.6043	72.407	82.0809	71.496	79.5577	76.5452	77.9103	39.7354	43.1381	41.8962	37.3657	37.4746	41.1545	39.1431	40.5188	43.1164	50.4176	76.9431	39.922	42.8701	3.81518	2.58844	4.45499
