# Supplementary material for: Molecular basis of wax-based color change and UV reflection in dragonflies
Source: eLife. 2019 Jan 15;8:e43045. doi: 10.7554/eLife.43045 (PMC6353593; doi:10.7554/eLife.43045)
Supplement: Figure 7—source data 1. [file elife-43045-fig7-data1.xlsx]

## Sheet: Omelania-OCEAN
	Male	Male	Male	Male	Male	Male	Male	Male	Male	Male	Female	Female	Female	Female	Female	Female	Female	Female	Female	Female
wavelength	M1D5	M2D5	M3D5	M4D5	M5D5	M1V5	M2V5	M3V5	M4V5	M5V5	F1D5	F2D5	F3D5	F4D5	F5D5	F1V5	F2V5	F3V5	F4V5	F5V5	male D5	female D5	male V5	female V5	male D%SD	female D%SD	male V5SD	femalseV5SD
300	32.299	25.617	33.388	30.96	36.465	11.617	6.983	18.974	10.338	11.239	1.192	2.433	2.95	0.606	3.681	1.448	5.602	6.933	4.062	13.382	31.7458	2.1724	11.8302	6.2854	3.98288	1.26127	4.39178	4.46072
301	32.111	25.212	32.658	31.688	35.48	12.052	6.765	18.59	10.287	11.082	1.147	2.552	3.175	0.311	3.683	1.343	5.316	6.712	4.502	12.869	31.4298	2.1736	11.7552	6.1484	3.77837	1.40956	4.31026	4.24204
302	31.803	25.824	33.21	30.828	35.919	11.745	6.968	18.309	10.05	10.891	0.975	2.846	3.384	0.746	3.529	1.444	5.583	6.608	4.369	13.218	31.5168	2.296	11.5926	6.2444	3.71519	1.33736	4.16509	4.35206
303	31.652	24.863	32.51	30.511	36.052	11.534	6.626	18.78	10.088	11.15	0.962	2.476	3.018	0.604	3.631	1.056	5.586	6.783	3.99	12.624	31.1176	2.1382	11.6356	6.0078	4.06389	1.30899	4.4379	4.27624
304	31.431	25.043	32.196	30.568	35.068	11.252	6.797	18.002	9.903	10.618	0.967	3.027	3.209	0.474	3.345	1.299	5.621	6.609	4.238	12.203	30.8612	2.2044	11.3144	5.994	3.66541	1.37043	4.11132	4.00611
305	31.355	24.839	32.513	30.759	35.436	11.474	6.696	18.55	10.118	10.523	0.648	2.451	3.231	0.4	3.429	1.269	5.549	6.8	4.472	13.019	30.9804	2.0318	11.4722	6.2218	3.87645	1.42685	4.34863	4.31801
306	30.762	24.931	31.95	30.07	34.523	11.137	6.596	17.698	10.214	10.381	0.919	2.212	3.281	0.446	3.859	1.254	5.565	6.583	4.07	12.764	30.4472	2.1434	11.2052	6.0472	3.51925	1.4682	4.03322	4.25791
307	30.627	24.453	32.23	30.115	34.77	11.328	6.645	18.138	10.069	10.793	0.801	2.697	3.063	0.481	3.678	1.052	5.498	6.596	4.233	12.862	30.439	2.144	11.3946	6.0482	3.80584	1.42063	4.18795	4.33842
308	30.228	24.04	32.241	30.102	34.552	11.201	6.556	18.087	10.187	10.843	1.023	2.54	3.109	0.443	4.128	1.267	5.585	6.565	3.994	12.958	30.2326	2.2486	11.3748	6.0738	3.90693	1.50994	4.18325	4.33887
309	30.245	24.167	31.558	30.11	34.712	10.95	6.538	17.683	9.647	10.745	0.989	2.706	3.09	0.352	3.41	1.185	5.199	6.563	4.304	12.836	30.1584	2.1094	11.1126	6.0174	3.82756	1.3558	4.07451	4.29385
310	29.984	24.225	31.042	29.455	34.698	10.884	6.684	17.544	10.324	10.255	0.735	2.517	2.779	0.261	3.645	1.055	4.837	6.414	4.189	12.693	29.8808	1.9874	11.1382	5.8376	3.76609	1.43211	3.94911	4.29887
311	30.062	24.169	31.765	29.849	34.379	11.179	6.686	17.956	10.221	10.546	0.788	2.3	3.239	0.422	3.589	1.265	5.475	6.435	4.262	13.438	30.0448	2.0676	11.3176	6.175	3.75193	1.42181	4.10296	4.50212
312	29.294	23.834	31.359	28.731	33.893	11.019	6.488	17.679	10.113	10.687	0.706	2.615	3.042	0.534	3.954	1.157	5.22	6.255	4.131	12.893	29.4222	2.1702	11.1972	5.9312	3.72362	1.49673	4.05148	4.33333
313	29.248	23.584	30.913	28.766	33.282	10.748	6.592	17.609	10.019	10.629	1.052	2.315	2.994	0.425	3.813	1.22	5.256	6.541	4.268	12.858	29.1586	2.1198	11.1194	6.0286	3.58185	1.3858	4.00629	4.29309
314	29.322	23.354	31.296	28.659	33.18	11.024	6.398	17.061	9.879	10.197	1.073	2.197	2.817	0.228	3.662	1.51	4.905	6.253	4.013	12.634	29.1622	1.9954	10.9118	5.863	3.6983	1.36636	3.86579	4.16195
315	29.365	23.398	31.769	29.056	33.144	10.607	6.12	17.348	9.658	11.068	1.102	2.693	3.017	0.356	3.745	1.33	5.505	6.249	4.051	13.035	29.3464	2.1826	10.9602	6.034	3.73359	1.40552	4.06398	4.34166
316	28.788	22.905	31.299	27.905	32.807	10.267	6.117	17.393	9.675	10.747	0.88	2.337	3.123	0.291	3.582	1.08	4.857	6.139	3.996	12.515	28.7408	2.0426	10.8398	5.7174	3.80249	1.41805	4.09093	4.23066
317	28.009	23.052	31.211	28.246	33.049	10.239	6.176	17.005	10.056	10.483	0.871	2.523	2.995	0.623	3.593	1.281	5.324	6.14	4.304	12.676	28.7134	2.121	10.7918	5.945	3.80137	1.31328	3.90038	4.18855
318	27.977	22.485	30.548	28.066	33.418	10.467	6.609	16.988	9.432	10.655	0.932	2.547	2.852	0.49	3.753	1.226	4.79	6.172	3.81	12.52	28.4988	2.1148	10.8302	5.7036	4.03185	1.365	3.80311	4.21758
319	27.99	22.469	30.564	28.073	33.115	10.435	6.329	17.116	9.767	10.326	0.908	2.311	2.989	0.416	3.584	1.392	4.982	6.067	3.876	12.609	28.4422	2.0416	10.7946	5.7852	3.94832	1.34877	3.91492	4.19029
320	27.958	22.175	30.473	27.884	32.503	9.994	6.151	16.762	9.359	10.235	0.737	2.732	3.108	0.409	3.695	1.291	5.033	6.006	3.827	13.346	28.1986	2.1362	10.5002	5.9006	3.87754	1.47226	3.86505	4.52068
321	28.241	22.391	30.292	27.21	31.858	9.7	6.341	16.94	9.654	10.541	0.843	2.32	3.167	0.323	3.921	1.436	4.873	5.888	3.781	12.834	27.9984	2.1148	10.6352	5.7624	3.61526	1.51984	3.87417	4.28538
322	27.651	22.013	30.597	27.111	31.537	9.656	5.951	16.417	9.841	9.853	0.551	2.522	2.946	0.357	3.4	1.351	4.788	6.261	3.75	12.474	27.7818	1.9552	10.3436	5.7248	3.73407	1.40681	3.77979	4.17573
323	26.587	21.628	29.425	27.015	32.488	9.758	6.123	16.382	9.44	9.98	1.035	2.416	2.665	0.238	4.042	1.265	4.911	5.932	3.618	12.729	27.4286	2.0792	10.3366	5.691	4.00342	1.48236	3.72717	4.30368
324	27.431	22.224	29.166	27.546	31.597	9.743	6.183	16.365	9.535	10.059	0.898	2.585	3.161	0.598	3.478	1.441	4.967	6.524	3.691	12.763	27.5928	2.144	10.377	5.8772	3.44096	1.31823	3.69655	4.27552
325	27.004	21.786	29.349	26.764	32.559	9.726	6.125	16.498	9.629	10.016	0.855	2.202	2.687	0.294	3.834	1.439	4.946	5.883	3.41	12.776	27.4924	1.9744	10.3988	5.6908	3.95125	1.42254	3.76356	4.30324
326	27.064	21.484	29.236	26.358	31.605	9.578	6.127	16.547	9.415	9.973	0.857	2.776	3.156	0.604	3.783	1.373	4.924	6.447	3.94	12.429	27.1494	2.2352	10.328	5.8226	3.77282	1.4227	3.80284	4.12871
327	26.872	21.771	29.551	26.776	32.201	9.74	6.11	16.598	9.344	10.377	0.859	2.359	3.161	0.373	3.658	1.325	5.058	6.164	3.669	13.015	27.4342	2.082	10.4338	5.8462	3.87377	1.42664	3.81984	4.39589
328	26.619	21.01	29.471	27.038	31.608	9.96	6.093	16.638	9.585	9.869	0.692	2.55	2.908	0.313	3.372	1.28	4.988	5.838	3.813	12.241	27.1492	1.967	10.429	5.632	3.97665	1.37484	3.82748	4.07384
329	25.804	21.194	28.857	26.324	31.645	9.918	5.726	16.535	10.313	9.302	0.987	2.459	3.231	0.525	4.067	1.243	4.617	5.78	3.622	12.906	26.7648	2.2538	10.3588	5.6336	3.8841	1.48982	3.90261	4.39507
330	26.152	21.263	28.698	26.28	31.189	9.619	5.626	16.448	9.513	10.114	0.99	2.429	3.336	0.616	3.793	1.568	5.026	6.135	3.907	12.667	26.7164	2.2328	10.264	5.8606	3.68033	1.40075	3.89729	4.16359
331	26.682	21.566	29.022	25.767	30.737	9.544	5.936	16.474	9.691	10.138	0.939	2.167	2.984	0.579	3.814	1.383	4.628	5.91	3.993	12.759	26.7548	2.0966	10.3566	5.7346	3.49653	1.35877	3.81167	4.25932
332	25.939	20.643	28.81	25.531	30.946	9.201	5.636	16.02	9.637	10.29	0.835	2.102	2.978	0.292	3.656	1.399	4.563	5.518	3.327	12.388	26.3738	1.9726	10.1568	5.439	3.89171	1.41244	3.7422	4.17865
333	26.653	20.874	28.219	25.413	30.762	9.646	6.017	16.22	9.494	9.907	0.64	2.427	2.788	0.339	4.071	1.113	4.775	5.633	3.996	12.913	26.3842	2.053	10.2568	5.686	3.67115	1.55618	3.69503	4.38266
334	25.77	20.694	28.658	25.567	30.749	9.165	5.706	16.04	9.87	9.717	1.052	2.289	3.241	0.511	4.08	1.159	5.088	5.739	3.578	12.923	26.2876	2.2346	10.0996	5.6974	3.79468	1.48245	3.73044	4.40657
335	25.93	20.527	27.883	25.765	30.306	9.072	5.926	15.88	10.051	9.949	0.952	2.58	3.168	0.369	3.61	1.524	4.746	5.679	4.101	12.793	26.0822	2.1358	10.1756	5.7686	3.60789	1.41058	3.60153	4.21881
336	25.746	20.8	27.91	26.344	30.361	9.424	6	15.54	9.072	9.752	0.945	2.404	2.885	0.364	3.734	1.439	4.691	5.758	3.694	12.652	26.2322	2.0664	9.9576	5.6468	3.52206	1.3893	3.46183	4.22841
337	25.463	20.221	27.747	24.932	30.549	8.908	5.844	15.765	9.645	9.994	0.718	2.414	3.078	0.781	3.809	1.176	5.166	5.912	3.836	12.615	25.7824	2.16	10.0312	5.741	3.81885	1.37908	3.59935	4.245
338	24.789	20.092	27.16	24.918	29.864	9.123	5.67	15.407	9.537	9.577	0.712	2.22	2.923	0.291	3.443	1.276	5.07	5.798	3.409	12.215	25.3646	1.9178	9.8628	5.5536	3.59858	1.3719	3.50189	4.1099
339	25.57	20.55	27.509	25.202	29.815	9.551	5.718	15.525	9.266	9.362	0.951	2.558	3.043	0.671	3.679	1.191	4.806	5.676	3.639	12.34	25.7292	2.1804	9.8844	5.5304	3.42742	1.3155	3.53347	4.16306
340	24.672	19.962	28.178	25.399	29.815	8.997	5.832	15.747	9.144	9.242	0.881	2.09	2.663	0.242	3.358	1.128	4.715	5.441	3.733	12.304	25.6052	1.8468	9.7924	5.4642	3.77825	1.27644	3.62278	4.15766
341	25.348	20.911	27.597	26.007	29.847	8.993	6.068	15.475	9.514	10.317	0.864	2.4	2.841	0.402	3.382	1.018	4.229	5.656	3.476	13.211	25.942	1.9778	10.0734	5.518	3.30364	1.28636	3.41907	4.61743
342	24.041	19.57	27.192	24.797	29.809	8.943	5.564	15.984	9.256	9.907	0.926	2.149	3.203	0.601	3.667	1.666	4.377	5.872	3.029	12.746	25.0818	2.1092	9.9308	5.538	3.81915	1.35087	3.77961	4.32152
343	24.793	20.319	26.819	24.021	29.028	8.631	5.414	15.714	9.234	9.632	0.864	2.551	2.99	0.425	3.549	1.44	4.705	5.761	3.978	12.459	24.996	2.0758	9.725	5.6686	3.25755	1.36249	3.7383	4.11661
344	25	20.035	26.517	24.469	29.161	9.126	5.664	15.482	8.712	9.338	0.944	2.276	2.762	0.153	3.561	1.435	5.149	5.246	3.456	12.853	25.0364	1.9392	9.6644	5.6278	3.33698	1.37855	3.576	4.32651
345	24.419	19.395	26.564	23.182	27.625	8.512	5.744	15.619	8.778	9.301	0.886	2.147	2.424	0.388	3.382	1.515	4.585	5.513	3.38	12.206	24.237	1.8454	9.5908	5.4398	3.22043	1.20741	3.64162	4.06707
346	24.327	19.366	26.452	24.196	28.983	8.722	5.648	14.896	9.102	9.544	0.903	2.407	3.005	0.529	3.369	1.302	4.661	5.231	3.548	12.639	24.6648	2.0426	9.5824	5.4762	3.54444	1.2657	3.34239	4.27704
347	24.047	19.617	26.609	23.214	28.699	8.125	5.226	15.21	9.341	9.679	0.776	2.479	2.871	0.392	3.687	1.035	4.286	5.322	3.305	12.367	24.4372	2.041	9.5162	5.263	3.45552	1.40619	3.63379	4.27594
348	24.224	19.081	26.81	24.226	28.945	8.831	5.835	14.743	9.406	10.195	0.712	2.349	2.765	0.688	3.295	1.217	4.627	5.429	3.51	12.809	24.6572	1.9618	9.802	5.5184	3.69078	1.19969	3.21732	4.37296
349	24.273	18.657	26.364	23.343	28.784	8.205	6.065	14.882	8.999	9.758	0.756	2.579	2.834	0.595	4.096	1.316	4.649	5.626	3.926	12.51	24.2842	2.172	9.5818	5.6054	3.77906	1.48304	3.26827	4.17756
350	24.068	18.884	26.571	22.883	27.837	8.504	5.208	15.002	8.672	9.669	0.649	2.153	3.208	0.491	3.988	0.941	4.811	5.678	3.439	12.629	24.0486	2.0978	9.411	5.4996	3.49094	1.54023	3.54823	4.36925
351	24.111	18.902	26.429	24.02	29.347	8.289	5.505	15.165	8.736	9.584	0.739	2.268	2.896	0.475	3.664	1.378	5.148	5.424	3.815	12.892	24.5618	2.0084	9.4558	5.7314	3.83779	1.37468	3.53906	4.31085
352	23.448	18.92	25.972	23.293	27.181	8.499	5.451	14.423	8.723	9.147	0.902	2.424	2.848	0.485	3.904	0.916	4.667	5.288	3.47	12.643	23.7628	2.1126	9.2486	5.3968	3.17558	1.41081	3.24209	4.38298
353	23.449	19.294	25.693	22.795	27.694	8.85	5.234	14.776	8.633	9.074	0.539	2.502	2.88	0.276	3.986	0.863	4.669	5.033	3.52	12.445	23.785	2.0366	9.3134	5.306	3.1695	1.58671	3.43571	4.31207
354	23.567	18.664	25.535	23.048	27.61	8.028	5.528	14.953	8.871	9.473	0.573	2.187	2.487	0.743	3.612	1.213	4.574	4.974	3.488	12.165	23.6848	1.9204	9.3706	5.2828	3.33385	1.27037	3.46379	4.11543
355	22.959	18.155	26.042	22.285	27.225	8.175	5.068	14.71	9.438	9.454	0.723	2.045	2.989	0.329	3.756	1.183	4.69	4.948	3.26	13.005	23.3332	1.9684	9.369	5.4172	3.55444	1.45616	3.48075	4.49738
356	22.685	18.359	25.657	21.992	27.884	8.124	5.451	14.63	8.599	8.955	0.735	2.306	2.571	0.279	3.619	1.174	4.43	5.073	3.368	13.084	23.3154	1.902	9.1518	5.4258	3.64245	1.37431	3.3581	4.5298
357	22.78	18.541	25.602	22.526	27.723	7.958	5.66	14.752	8.928	9.099	0.858	2.614	3.054	0.621	3.659	1.478	4.659	5.267	3.598	12.544	23.4344	2.1612	9.2794	5.5092	3.47453	1.35241	3.3523	4.18847
358	22.792	18.181	25	21.831	27.429	8.467	5.366	14.544	9.138	9.36	0.951	2.466	2.873	0.596	3.051	1.402	4.282	5.203	3.252	12.678	23.0466	1.9874	9.375	5.3634	3.47267	1.1352	3.30422	4.32577
359	22.983	18.067	25.614	22.314	26.734	8.315	5.673	13.897	8.664	9.304	0.717	2.537	2.724	0.441	3.591	1.446	4.646	5.073	3.258	12.386	23.1424	2.002	9.1706	5.3618	3.37193	1.36202	2.98239	4.17417
360	22.655	17.959	24.437	22.053	26.428	7.845	5.215	14.29	8.562	9.667	0.862	2.323	2.593	0.351	3.649	1.138	4.673	4.74	2.903	12.327	22.7064	1.9556	9.1158	5.1562	3.15486	1.33974	3.32468	4.27346
361	23.045	18.138	24.536	22.059	26.584	8.026	5.492	14.034	8.945	9.005	0.885	2.736	2.872	0.515	3.753	1.471	4.619	5.337	3.278	12.431	22.8724	2.1522	9.1004	5.4272	3.14839	1.38814	3.10437	4.18286
362	22.123	18.348	24.199	21.425	26.944	8.148	5.489	14.121	9.163	9.665	0.648	2.559	2.866	0.48	4.058	0.873	4.292	4.572	3.212	12.144	22.6078	2.1222	9.3172	5.0186	3.20603	1.52982	3.13223	4.24112
363	22.124	18.081	25.625	21.505	26.145	8.039	5.574	13.638	9.117	9.474	0.442	2.329	2.586	0.623	3.837	0.858	4.292	4.698	3.304	12.374	22.696	1.9634	9.1684	5.1052	3.29843	1.4268	2.92697	4.32856
364	22.18	17.366	24.94	21.23	26.99	8.058	5.536	14.004	8.917	9.111	0.671	2.419	2.911	0.519	3.83	1.013	4.825	4.798	3.103	12.313	22.5412	2.07	9.1252	5.2104	3.6803	1.43957	3.07683	4.26687
365	22.137	18.07	24.349	21.084	26.847	8.018	5.361	13.83	8.066	9.33	0.773	2.611	2.802	0.451	2.95	1.293	4.538	5.016	3.362	12.611	22.4974	1.9174	8.921	5.364	3.31952	1.2031	3.10184	4.29836
366	21.776	17.883	24.306	21.32	26.947	7.842	5.32	13.968	8.657	9.407	0.927	1.935	2.503	0.244	3.571	1.341	4.046	4.587	2.95	12.438	22.4464	1.836	9.0388	5.0724	3.4006	1.3063	3.15595	4.30026
367	22.782	17.812	23.798	20.404	25.73	7.586	5.245	13.603	8.808	9.177	1.084	2.681	2.722	0.474	3.511	1.387	4.591	4.97	3.548	12.098	22.1052	2.0944	8.8838	5.3188	3.07362	1.26406	3.05318	4.03744
368	22.042	17.914	24.569	21.091	26.338	8.026	5.32	14.556	8.979	9.219	0.93	2.467	3.067	0.477	3.808	1.42	5.084	5.247	3.326	12.877	22.3908	2.1498	9.22	5.5908	3.24722	1.41224	3.36031	4.35857
369	22.323	17.828	23.934	21.027	25.305	7.696	5.213	13.511	8.751	9.007	0.819	2.307	2.932	0.278	3.464	1.434	4.586	5.044	3.266	12.698	22.0834	1.96	8.8356	5.4056	2.87599	1.36549	3.01321	4.31083
370	21.879	17.337	23.517	20.519	25.757	7.586	4.982	13.937	8.637	8.9	0.588	2.74	2.839	0.492	3.368	1.295	5.031	5.185	3.373	12.655	21.8018	2.0054	8.8084	5.5078	3.16905	1.35928	3.25868	4.29299
371	21.567	17.14	23.834	20.6	25.731	7.86	5.35	14.319	8.971	8.862	0.883	2.626	2.626	0.551	3.762	1.054	4.221	5.097	3.148	12.345	21.7744	2.0896	9.0724	5.173	3.27095	1.34123	3.27519	4.28417
372	22.146	16.739	24.173	21.355	25.772	7.722	5.396	13.614	8.865	9.641	0.32	2.276	2.746	0.341	3.847	1.225	4.894	4.809	3.443	12.569	22.037	1.906	9.0476	5.388	3.42996	1.54714	3.01367	4.27959
373	21.779	17.574	24.2	20.34	25.839	7.487	5.372	13.944	8.618	9.311	0.655	2.389	2.864	0.317	3.482	0.922	4.95	5.224	3.31	12.478	21.9464	1.9414	8.9464	5.3768	3.23873	1.38911	3.16713	4.32289
374	21.558	16.917	23.315	21.011	25.27	7.671	5.453	13.207	8.853	9.472	0.691	2.476	2.433	0.173	3.624	1.341	4.462	4.923	3.282	12.889	21.6142	1.8794	8.9312	5.3794	3.11	1.41687	2.8402	4.42017
375	21.727	17.342	23.748	20.544	25.825	7.535	5.105	13.444	8.372	9.258	0.666	2.539	3.087	0.678	3.381	1.198	4.543	5.193	3.505	12.574	21.8372	2.0702	8.7428	5.4026	3.21889	1.31166	3.04945	4.28636
376	20.918	16.895	23.307	20.655	24.977	7.671	5.576	13.058	8.487	9.142	0.907	2.445	2.929	0.739	4.197	1.346	4.649	4.748	3.384	12.683	21.3504	2.2434	8.7868	5.362	3.06193	1.4471	2.73923	4.31634
377	21.227	17.089	23.272	20.302	26.243	7.4	5.355	14.36	8.896	9.743	0.595	2.444	2.758	0.257	3.94	1.125	4.43	4.83	3.058	12.606	21.6266	1.9988	9.1508	5.2098	3.41037	1.54494	3.35503	4.38098
378	21.166	17.537	23.533	19.295	25.132	7.591	5.604	13.971	9.019	8.848	0.824	2.479	2.507	0.446	4.052	1.301	4.457	5.015	3.078	12.527	21.3326	2.0616	9.0066	5.2756	3.07666	1.45569	3.09242	4.29964
379	21.44	16.745	23.677	20.087	24.657	7.602	5.295	13.301	8.732	9.38	0.74	2.619	2.84	0.731	3.77	0.97	4.687	5.114	3.35	12.336	21.3212	2.14	8.862	5.2914	3.12875	1.35292	2.92835	4.25637
380	21.421	16.421	23.261	19.518	24.913	7.69	5.573	13.199	8.592	9.289	0.806	2.907	2.739	0.643	3.622	1.352	4.724	4.85	3.55	12.108	21.1068	2.1434	8.8686	5.3168	3.30558	1.33828	2.79534	4.04756
381	21.088	16.844	22.717	19.874	25.161	7.388	5.526	13.203	8.838	9.407	0.706	2.359	2.91	0.692	3.843	1.085	3.941	4.237	3.178	12.527	21.1368	2.102	8.8724	4.9936	3.11112	1.38626	2.84793	4.38766
382	20.605	16.529	23.168	19.254	25.179	7.494	5.139	13.526	8.926	9.474	0.826	2.414	2.735	0.377	3.884	1.11	4.353	4.758	2.874	12.856	20.947	2.0472	8.9118	5.1902	3.36692	1.43721	3.07617	4.51843
383	20.507	16.477	22.635	19.838	25.34	7.16	5.275	13.618	8.513	9.262	0.666	2.537	2.828	0.333	3.53	0.819	5.184	4.796	3.355	12.563	20.9594	1.9788	8.7656	5.3434	3.29967	1.40277	3.10718	4.38382
384	20.522	16.427	22.599	19.496	24.674	7.608	5.246	12.736	8.557	8.726	0.944	2.159	2.73	0.474	3.825	1.359	4.234	4.359	3.301	12.475	20.7436	2.0264	8.5746	5.1456	3.12767	1.35362	2.70898	4.26939
385	20.913	16.56	22.763	19.142	25.243	7.352	5.135	13.177	8.688	9.297	0.637	2.075	2.716	0.382	3.926	1.3	3.821	4.408	2.948	12.568	20.9242	1.9472	8.7298	5.009	3.32625	1.4739	2.95474	4.38507
386	21.038	16.366	22.194	19.274	24.448	7.596	5.616	13.18	8.643	8.91	0.732	2.495	3.002	0.48	3.751	1.34	4.416	4.656	3.122	12.617	20.664	2.092	8.789	5.2302	3.04977	1.43099	2.77525	4.33404
387	20.613	16.158	22.162	18.833	24.318	7.122	5.105	13.083	8.419	9.196	0.872	2.536	2.967	0.391	4.019	1.17	4.707	5.058	3.129	12.408	20.4168	2.157	8.585	5.2944	3.12047	1.50306	2.95312	4.26333
388	20.844	15.889	23.199	19.096	24.571	7.282	5.304	13.293	8.892	9.026	0.695	2.706	3.174	0.469	3.61	1.024	4.621	4.969	3.295	12.621	20.7198	2.1308	8.7594	5.306	3.42662	1.45175	2.94808	4.3724
389	20.516	16.294	21.926	17.773	24.048	7.207	5.697	13.183	8.578	9.029	0.998	2.367	2.755	0.665	4.229	1.218	4.333	4.333	3.226	12.566	20.1114	2.2028	8.7388	5.1352	3.12226	1.43647	2.80446	4.34435
390	20.145	16.053	22.59	18.457	22.911	7.278	5.142	12.825	8.418	8.555	0.705	2.538	3.145	0.607	3.627	1.241	4.759	4.745	3.09	12.795	20.0312	2.1244	8.4436	5.326	2.87914	1.39532	2.80486	4.41961
391	20.223	16.457	22.004	18.029	24.374	7.212	5.478	12.794	8.535	8.76	0.894	2.859	3.282	0.803	3.63	1.372	4.507	4.698	3.241	12.809	20.2174	2.2936	8.5558	5.3254	3.13843	1.34753	2.70569	4.38867
392	19.832	15.838	22.437	18.366	23.32	7.033	5.628	12.857	8.831	9.056	0.515	2.891	3.145	0.642	4.011	1.144	4.899	4.725	3.306	12.902	19.9586	2.2408	8.681	5.3952	3.04028	1.57389	2.72208	4.45771
393	19.599	15.861	22.221	18.23	23.5	7.948	5.153	12.549	9.138	8.498	0.891	2.758	2.8	0.28	3.655	1.375	4.801	4.465	2.884	12.382	19.8822	2.0768	8.6572	5.1814	3.06343	1.42411	2.65448	4.25069
394	20.053	16.482	21.819	18.126	23.265	7.203	5.332	12.771	8.247	9.155	0.578	2.607	3.044	0.831	3.985	1.222	4.819	4.692	3.382	12.063	19.949	2.209	8.5416	5.2356	2.73162	1.46363	2.75882	4.08128
395	20.227	15.743	21.237	18.479	23.559	7.268	5.346	13.026	8.648	8.881	0.801	2.53	2.959	0.357	3.88	1.189	4.875	4.603	2.974	12.714	19.849	2.1054	8.6338	5.271	2.9398	1.48463	2.82965	4.41419
396	20.459	15.844	20.367	18.549	23.209	7.081	5.081	12.299	8.037	8.877	0.764	2.885	3.473	0.84	3.957	1.422	4.789	4.607	3.445	12.422	19.6856	2.3838	8.275	5.337	2.71692	1.49328	2.65701	4.18143
397	19.702	15.743	21.572	18.32	23.84	7.426	5.271	13.293	8.593	8.832	0.905	2.401	2.7	0.76	3.774	1.326	4.233	4.613	3.12	12.562	19.8354	2.108	8.683	5.1708	3.08685	1.27242	2.93701	4.3246
398	19.209	15.795	21.86	18.404	23.302	6.92	5.161	13.371	8.474	8.774	0.938	2.235	2.871	0.704	3.966	1.25	4.645	4.185	2.885	12.395	19.714	2.1428	8.54	5.072	2.94995	1.35872	3.0594	4.30076
399	19.685	15.753	21.159	18	22.605	7.485	5.425	12.785	8.479	8.821	0.761	2.443	3.051	0.801	3.606	1.472	4.445	4.114	3.092	12.666	19.4404	2.1324	8.599	5.1578	2.67861	1.3005	2.68801	4.35383
400	19.364	15.686	21.335	18.41	23.498	6.881	5.359	11.951	8.683	8.886	0.659	2.689	2.859	0.566	4.186	1.2	4.571	4.147	3.114	12.667	19.6586	2.1918	8.352	5.1398	2.95714	1.55418	2.47333	4.40437
401	19.618	15.339	21.597	18.057	23.047	7.053	5.068	12.178	8.701	8.685	0.498	2.883	3.025	0.653	3.602	1.349	4.942	4.786	3.338	12.74	19.5316	2.1322	8.337	5.431	3.01595	1.44739	2.61447	4.33359
402	18.936	15.149	21.224	17.923	22.61	6.584	5.025	12.644	8.066	8.86	0.977	2.644	2.844	0.757	4.064	1.151	4.33	4.287	3.272	12.551	19.1684	2.2572	8.2358	5.1182	2.90821	1.38275	2.86742	4.35045
403	19.839	15.558	21.059	18.053	22.692	7.019	5.376	12.925	8.302	8.942	0.701	2.493	2.674	0.39	4.12	1.35	4.136	4.275	2.883	12.696	19.4402	2.0756	8.5128	5.068	2.75452	1.53644	2.81812	4.42384
404	19.187	15.206	21.212	17.606	22.686	7.02	5.006	12.467	8.409	8.803	0.884	2.539	2.964	0.691	4.073	1.519	4.347	4.307	3.004	12.569	19.1794	2.2302	8.341	5.1492	2.94496	1.43275	2.74359	4.30658
405	18.985	15.247	20.754	17.088	22.696	6.742	4.992	12.224	8.865	8.909	0.847	2.738	3.371	0.771	3.841	1.403	4.637	4.431	3.082	12.005	18.954	2.3136	8.3464	5.1116	2.93544	1.42843	2.71327	4.06449
406	19.084	15.711	20.732	17.241	22.024	7.161	5.468	11.904	8.29	8.428	0.687	2.619	3.32	0.272	3.799	1.282	4.852	4.451	3.063	12.55	18.9584	2.1394	8.2502	5.2396	2.55218	1.57914	2.3617	4.31898
407	19.539	15.2	20.818	16.884	22.011	7.215	5.529	12.066	7.574	8.597	0.77	2.616	3.131	0.843	4.353	1.34	4.332	4.303	2.988	12.113	18.8904	2.3426	8.1962	5.0152	2.8071	1.53785	2.42898	4.15239
408	18.889	15.254	21.039	16.929	22.898	6.718	5.628	12.535	8.898	8.819	1.228	2.666	3.3	0.706	4.268	1.147	4.77	4.352	3.127	12.992	19.0018	2.4336	8.5196	5.2776	3.06944	1.46695	2.64402	4.53633
409	19.057	15.235	20.764	17.372	22.666	7.082	5.439	12.775	8.638	9.066	0.53	2.608	2.79	0.589	4.074	1.087	4.542	4.346	2.972	13.378	19.0188	2.1182	8.6	5.265	2.8887	1.53111	2.73612	4.74082
410	18.338	15.689	20.729	17.425	22.704	6.854	5.337	11.887	8.551	8.615	1.075	2.882	3.016	0.576	4.632	1.639	4.568	4.183	2.809	13.344	18.977	2.4362	8.2488	5.3086	2.76532	1.63322	2.44366	4.63943
411	19.07	15.069	20.561	17.085	22.446	7.223	5.664	12.248	8.149	8.575	0.894	2.504	2.668	0.537	4.115	1.567	4.83	3.682	2.832	12.838	18.8462	2.1436	8.3718	5.1498	2.8861	1.45206	2.43761	4.46021
412	19.12	15.437	20.354	16.818	21.389	7.25	5.62	12.263	8.122	8.584	0.482	2.616	3.527	0.617	4.507	1.156	4.614	4.438	3.027	12.55	18.6236	2.3498	8.3678	5.157	2.46489	1.77493	2.45355	4.35928
413	18.659	15.055	19.694	16.798	21.01	7.115	5.546	11.583	8.391	9.329	0.852	2.631	3.281	0.817	3.833	1.463	4.552	4.597	3.221	12.06	18.2432	2.2828	8.3928	5.1786	2.35511	1.38893	2.27985	4.05347
414	18.545	15.048	19.37	16.519	21.604	6.834	5.266	12.035	8.101	8.501	0.971	2.898	3.325	0.595	4.351	1.785	4.728	4.134	3.112	12.469	18.2172	2.428	8.1474	5.2456	2.54138	1.59736	2.51337	4.18954
415	18.598	14.225	19.415	16.231	21.945	6.567	4.898	11.859	8.571	8.623	1.196	3.117	3.289	0.862	4.062	1.618	4.856	4.402	3.242	12.014	18.0828	2.5052	8.1036	5.2264	2.96937	1.39878	2.60904	3.99521
416	17.928	14.451	19.536	16.382	20.617	7.038	5.855	12.008	8.418	8.627	0.678	2.398	2.997	0.356	4.183	1.386	4.179	3.823	2.705	12.844	17.7828	2.1224	8.3892	4.9874	2.4592	1.60417	2.31306	4.52534
417	18.734	14.381	20.453	16.765	21.896	7.112	5.107	12.133	7.964	9.104	0.799	3.144	3.78	0.538	4.4	1.659	4.741	5.002	3.226	13.326	18.4458	2.5322	8.284	5.5908	2.97336	1.76074	2.60079	4.52641
418	18.275	15.32	19.491	15.947	21.091	6.753	5.083	11.956	8.137	8.171	1.039	2.82	3.674	1.096	4.507	1.604	5.238	4.432	3.352	12.524	18.0248	2.6272	8.02	5.43	2.41076	1.54382	2.53771	4.19267
419	18.558	15.007	19.772	16.253	20.707	6.893	5.27	12.309	8.33	8.041	0.973	2.499	3.096	0.33	4.012	1.888	4.526	3.85	2.719	13.278	18.0594	2.182	8.1686	5.2522	2.38598	1.51463	2.60837	4.60005
420	18.354	14.88	19.127	16.085	21.118	6.338	5.457	11.817	8.489	8.759	0.999	2.641	3.396	0.711	4.204	1.984	4.629	4.107	3.12	12.375	17.9128	2.3902	8.172	5.243	2.47391	1.50993	2.47315	4.11282
421	18.339	15.023	19.231	15.43	20.709	6.621	5.724	11.131	7.783	7.934	0.938	2.662	3.373	0.739	4.148	1.51	4.641	4.07	2.634	12.187	17.7464	2.372	7.8386	5.0084	2.45534	1.49694	2.04977	4.19596
422	18.525	14.573	19.592	16.075	21.147	6.422	5.582	11.97	8.121	8.392	1.12	2.734	3.566	1.013	4.242	1.673	5.329	3.941	2.928	12.966	17.9824	2.535	8.0974	5.3674	2.6534	1.44353	2.46062	4.45461
423	18.002	14.444	19.51	15.611	21.19	6.979	5.593	11.681	8.353	8.26	0.903	2.945	3.345	0.915	4.377	1.794	4.774	3.974	3.059	12.436	17.7514	2.497	8.1732	5.2074	2.76132	1.54092	2.25987	4.19013
424	17.604	14.198	18.677	15.685	20.441	6.787	5.715	12.283	7.638	8.598	1.139	2.569	3.405	0.952	4.22	2.034	4.589	4.098	2.756	12.142	17.321	2.457	8.2042	5.1238	2.45371	1.41612	2.51579	4.05422
425	18.698	14.337	18.826	15.346	20.301	7.002	5.348	12.027	7.874	8.595	1.036	2.702	3.667	0.772	4.49	1.47	5.166	4.483	3.014	12.316	17.5016	2.5334	8.1692	5.2898	2.53394	1.61914	2.47349	4.17744
426	17.583	14.957	19.095	15.481	20.218	6.781	5.171	11.851	7.895	8.595	1.283	2.813	3.69	0.922	4.818	2.096	4.899	4.279	2.843	12.779	17.4668	2.7052	8.0586	5.3792	2.26253	1.63155	2.48331	4.28398
427	18.438	14.223	18.414	15.514	20.213	6.8	5.488	12.536	8.028	9.032	0.962	2.207	3.274	0.607	4.906	1.826	4.71	4.281	2.607	12.424	17.3604	2.3912	8.3768	5.1696	2.43213	1.75809	2.67775	4.22415
428	18.296	14.629	18.821	15.444	20.187	6.567	5.583	12.02	8.443	8.321	0.967	3.114	3.542	0.843	4.636	1.988	5.442	4.199	2.928	12.297	17.4754	2.6204	8.1868	5.3708	2.34869	1.66197	2.45869	4.08537
429	17.957	14.654	18.903	15.284	20.079	6.84	5.965	12.18	8.326	8.914	0.965	2.886	3.416	0.912	4.884	1.968	4.968	4.315	2.831	12.636	17.3754	2.6126	8.445	5.3436	2.33245	1.69456	2.39326	4.24517
430	18.02	14.652	18.685	14.741	19.737	7.417	6.055	11.833	7.933	8.868	0.888	2.678	3.498	0.834	4.85	1.583	5.015	4.072	2.719	12.695	17.167	2.5496	8.4212	5.2168	2.33707	1.72569	2.16135	4.37945
431	18.613	14.874	18.383	14.447	19.695	7.06	6.139	11.758	7.642	8.527	0.964	2.807	3.774	0.89	4.69	1.8	5.308	3.896	3.114	12.234	17.2024	2.625	8.2252	5.2704	2.37752	1.68721	2.15765	4.09499
432	18.758	14.811	17.874	14.474	20.251	7.469	6.705	12.23	8.038	8.615	1.46	2.726	4.097	1.02	5.1	1.976	5.33	3.747	2.787	12.659	17.2336	2.8806	8.6114	5.2998	2.5161	1.72549	2.14257	4.29918
433	18.615	14.761	18.414	14.708	19.665	7.381	6.559	11.978	8.159	8.776	0.931	3.033	3.772	0.573	4.924	2.133	5.386	3.968	2.972	12.4	17.2326	2.6466	8.5706	5.3718	2.32947	1.86048	2.07868	4.11143
434	19.218	14.51	18.161	14.447	19.813	7.562	6.606	11.535	8.099	8.917	0.861	3.118	4.087	1.196	5.317	1.837	5.176	3.92	2.83	12.32	17.2298	2.9158	8.5438	5.2166	2.58042	1.89462	1.87106	4.16109
435	19.264	15.473	17.743	13.514	19.691	7.643	6.773	12.25	7.933	7.88	0.484	2.79	3.748	0.875	5.458	1.483	6.208	3.649	3.104	13.215	17.137	2.671	8.4958	5.5318	2.61292	2.05852	2.14973	4.61846
436	19.418	15.138	17.739	14.138	19.504	7.465	6.757	12.141	7.506	8.183	1.474	3.307	4.549	1.158	5.331	2.66	6.262	4.046	2.854	12.195	17.1874	3.1638	8.4104	5.6034	2.4569	1.83812	2.14561	3.95383
437	18.753	15.471	17.262	13.525	19.371	7.603	6.301	12.599	7.604	8.751	1.366	3.307	4.654	1.015	5.384	2.023	6.106	3.884	2.869	12.396	16.8764	3.1452	8.5716	5.4556	2.40314	1.93767	2.41258	4.16939
438	19.005	16.029	17.372	13.917	18.891	7.57	7.275	12.74	7.746	8.031	1.299	2.623	4.101	1.021	5.183	2.044	5.721	3.133	3.116	12.873	17.0428	2.8454	8.6724	5.3774	2.13148	1.78956	2.29036	4.40355
439	19.172	15.582	17.27	14.097	18.672	7.8	6.792	12.656	7.496	8.625	1.245	2.441	3.808	0.729	5.783	2.276	5.793	3.425	2.824	12.442	16.9586	2.8012	8.6738	5.352	2.12224	2.04636	2.32122	4.18415
440	18.588	15.121	17.338	14.204	18.865	7.751	7.333	13.232	8.332	8.728	1.372	3.106	5.078	1.228	6.467	1.877	6.213	3.925	3.032	12.696	16.8232	3.4502	9.0752	5.5486	2.08003	2.29817	2.38436	4.30049
441	19.957	15.486	17.482	13.554	19.195	7.86	7.175	12.611	7.624	8.337	1.22	3.407	4.464	1.494	6.045	2.404	6.633	4.045	3.225	12.322	17.1348	3.326	8.7214	5.7258	2.63962	2.03015	2.21441	4.01392
442	19.632	15.791	16.847	13.817	19.066	8.646	7.538	12.775	7.507	7.97	1.268	3.33	4.102	1.269	6.117	2.304	6.42	3.587	2.851	11.617	17.0306	3.2172	8.8872	5.3558	2.38787	2.04935	2.22147	3.84224
443	19.824	16.078	17.177	13.7	18.33	8.998	8.335	12.188	7.672	7.899	1.409	2.998	4.479	1.138	5.499	2.296	6.556	3.54	2.89	11.621	17.0218	3.1046	9.0184	5.3806	2.3191	1.89579	1.84253	3.85454
444	19.926	15.99	17.668	12.99	19.018	8.856	7.503	13.116	7.647	8.744	1.252	2.822	4.704	1.129	6.315	2.149	6.859	3.336	2.72	12.54	17.1184	3.2444	9.1732	5.5208	2.74363	2.24622	2.28852	4.33148
445	20.031	16.362	17.276	13.338	18.57	9.49	8.285	12.93	7.68	8.939	1.577	2.697	4.807	1.374	6.332	2.277	6.7	2.982	2.747	12.132	17.1154	3.3574	9.4648	5.3676	2.52382	2.14997	2.05318	4.17261
446	20.799	16.357	16.304	13.122	18.793	9.06	8.435	12.957	7.254	7.88	1.797	2.909	4.811	0.881	5.968	2.964	6.903	3.553	2.72	11.886	17.075	3.2732	9.1172	5.6052	2.89637	2.10126	2.24805	3.89373
447	21.047	16.506	16.707	12.418	18.233	9.485	8.841	13.124	7.197	8.9	1.572	3.246	5.152	1.387	6.474	2.82	7.301	3.094	3.079	11.39	16.9822	3.5662	9.5094	5.5368	3.13135	2.22477	2.19267	3.76701
448	20.614	16.618	16.469	12.28	17.765	9.698	9.308	12.44	7.291	8.139	1.835	3.136	5.435	1.66	6.108	2.951	7.521	3.289	2.634	11.497	16.7492	3.6348	9.3752	5.5784	3.00158	2.04605	1.96047	3.86062
449	21.783	17.05	16.281	12.54	17.961	10.162	9.238	13.19	7.562	8.228	1.23	3.199	5.277	1.365	6.531	1.922	7.46	2.911	2.866	11.906	17.123	3.5204	9.676	5.413	3.32175	2.35289	2.19897	4.22148
450	21.52	17.953	16.105	12.462	18.421	9.474	8.81	13.245	7.19	8.324	1.715	3.228	5.587	1.568	6.774	3.043	7.76	3.244	2.545	11.967	17.2922	3.7744	9.4086	5.7118	3.32887	2.32868	2.30104	4.07933
451	20.633	16.867	15.945	11.565	17.554	10.265	9.697	13.34	6.521	8.196	1.877	2.746	5.493	1.309	6.72	2.872	7.105	2.906	2.826	11.598	16.5128	3.629	9.6038	5.4614	3.27829	2.35904	2.54414	3.89036
452	20.348	16.275	15.379	11.493	17.608	9.796	9.305	12.833	7.639	8.125	1.858	3.075	5.267	1.538	6.768	3.173	7.656	2.879	2.961	11.493	16.2206	3.7012	9.5396	5.6324	3.24121	2.25421	2.03597	3.84733
453	20.38	17.065	15.842	11.86	17.684	9.62	9.185	12.333	6.667	8.439	1.693	3.037	5.507	1.819	6.825	3.201	7.059	3.204	2.687	11.298	16.5662	3.7762	9.2488	5.4898	3.11111	2.2917	2.06007	3.69177
454	20.306	16.529	15.968	11.24	18.427	9.64	9.712	12.885	7.239	8.815	1.514	2.844	5.453	1.171	6.824	2.518	7.26	2.794	2.392	11.915	16.494	3.5612	9.6582	5.3758	3.3967	2.4821	2.06028	4.18471
455	21.694	16.726	15.601	11.058	17.319	9.971	9.703	13.049	7.162	8.727	2.172	3.349	5.866	1.383	6.482	2.719	7.582	3	2.633	12.028	16.4796	3.8504	9.7224	5.5924	3.81186	2.24413	2.16072	4.15664
456	20.786	16.43	16.208	12.042	16.779	10.722	9.211	12.815	7.508	8.297	2.052	3.032	6.113	1.639	6.601	3.184	7.735	2.999	2.819	11.908	16.449	3.8874	9.7106	5.729	3.09833	2.31693	2.1071	4.01877
457	20.387	16.68	16.065	11.581	17.744	9.995	9.796	12.595	7.224	8.112	2.347	2.672	5.727	1.551	7.367	3.736	7.708	2.733	2.779	11.724	16.4914	3.9328	9.5444	5.736	3.20445	2.48949	2.06207	3.92131
458	21.102	16.028	15.765	11.756	17.031	9.89	9.439	12.57	7.31	8.531	2.031	3.322	6.427	2.06	7.566	3.332	7.457	3.685	3.322	11.545	16.3364	4.2812	9.548	5.8682	3.33898	2.56474	1.95603	3.6205
459	20.669	16.781	16.03	11.474	17.994	10.286	9.39	13.254	7.701	8.698	1.932	3.148	6.048	2.035	7.9	3.568	7.761	3.119	2.768	12.011	16.5896	4.2126	9.8658	5.8454	3.35905	2.64774	2.11737	3.99294
460	20.597	16.547	15.896	11.446	17.307	9.758	9.819	12.827	7.068	8.348	2.104	3.828	6.657	1.859	7.519	3.671	8.197	3.315	3.176	11.838	16.3586	4.3934	9.564	6.0394	3.28811	2.59217	2.14817	3.85713
461	21.124	16.318	15.482	11.714	17.235	10.25	9.945	12.769	6.974	8.864	2.581	3.16	6.053	2	7.549	4.208	7.653	2.92	2.827	11.344	16.3746	4.2686	9.7604	5.7904	3.38446	2.40669	2.11501	3.66867
462	20.848	16.609	15.158	11.462	16.912	9.867	9.881	12.975	7.258	8.57	2.229	2.919	6.728	1.846	7.646	3.798	7.997	3.037	2.723	11.261	16.1978	4.2736	9.7102	5.7632	3.38425	2.70674	2.12285	3.73339
463	20.878	16.331	15.719	11.325	17.087	9.491	9.597	12.668	7.232	8.311	2.32	3.273	6.975	2.17	7.759	4.188	8.286	3.383	3.15	11.613	16.268	4.4994	9.4598	6.124	3.41546	2.66616	2.03686	3.70504
464	20.575	17.07	15.13	11.601	17.129	9.645	9.94	12.662	6.96	9.034	2.648	3.465	7.025	2.282	8.614	4.576	8.029	3.214	3.059	12.452	16.301	4.8068	9.6482	6.266	3.27892	2.83948	2.04767	3.9947
465	20.259	16.436	15.266	10.954	17.258	9.738	9.879	12.862	7.21	8.285	2.432	3.728	7.069	2.087	7.862	4.36	8.101	2.989	3.072	11.618	16.0346	4.6356	9.5948	6.028	3.38772	2.66955	2.13183	3.7517
466	20.661	16.22	15.345	11.416	16.79	10.094	9.609	12.181	7.284	8.323	2.242	3.453	6.824	2.441	8.359	4.672	8.266	2.883	2.86	11.619	16.0864	4.6638	9.4982	6.06	3.30916	2.76555	1.86068	3.80883
467	20.333	16.688	15.308	11.362	16.936	10.343	10.028	12.634	7.012	8.248	2.38	3.606	7.052	2.396	8.403	5.131	8.124	2.83	3.298	11.695	16.1254	4.7674	9.653	6.2156	3.24174	2.78877	2.14779	3.70192
468	20.195	16.745	15.475	11.389	17.396	9.968	10.042	12.998	7.269	8.31	2.442	3.805	7.386	2.376	8.958	4.802	8.078	3.224	3.102	11.91	16.24	4.9934	9.7174	6.2232	3.21523	3.00896	2.17405	3.75955
469	20.662	15.941	15.614	10.884	16.889	9.358	9.528	12.434	7.486	8.657	2.79	3.431	7.118	2.299	8.749	5.29	8.118	3.331	2.843	11.504	15.998	4.8774	9.4926	6.2172	3.49466	2.87694	1.83002	3.61035
470	20.227	16.289	15.108	11.117	16.157	10.107	10.571	12.554	7.07	8.404	3.084	3.162	7.185	2.1	8.609	5.957	7.948	2.996	2.697	12.178	15.7796	4.828	9.7412	6.3552	3.2547	2.87709	2.10105	3.91367
471	20.012	15.845	14.748	10.908	16.512	10.206	9.37	12.359	7.369	8.34	2.618	3.683	8.03	2.669	8.853	5.587	8.335	3.018	3.051	11.399	15.605	5.1706	9.5288	6.278	3.28246	3.02997	1.90865	3.60467
472	20.126	15.94	15.175	11.132	16.703	10.01	10.069	12.346	7.349	8.454	2.882	3.261	7.316	2.278	8.91	5.986	7.818	2.822	2.958	12.031	15.8152	4.9294	9.6456	6.323	3.2299	2.98104	1.89067	3.82459
473	19.974	16.251	15.177	10.882	16.317	10.19	9.959	12.289	7.542	8.436	2.579	3.456	8.09	2.67	9.001	6.237	8.05	2.982	3.012	11.683	15.7202	5.1592	9.6832	6.3928	3.25715	3.12664	1.82094	3.66811
474	19.697	15.766	14.996	10.973	16.419	9.547	9.96	12.407	7.508	8.573	2.866	3.192	7.619	2.588	9.21	6.516	7.736	2.89	2.841	11.819	15.5702	5.095	9.599	6.3604	3.13262	3.08945	1.83322	3.74642
475	19.74	16	14.444	10.871	16.101	9.709	9.93	12.481	7.546	8.746	3.12	3.307	7.864	2.765	9.404	6.952	8.158	3.068	2.802	11.747	15.4312	5.292	9.6824	6.5454	3.20577	3.10513	1.82587	3.73924
476	19.409	15.548	15.122	11.112	15.994	9.952	10.191	12.676	7.426	8.757	3.346	3.65	8.291	3.025	9.359	6.744	7.874	3.077	3.103	11.616	15.437	5.5342	9.8004	6.4828	2.95399	3.03577	1.9475	3.58385
477	19.36	15.816	14.929	10.76	16.033	9.299	9.535	12.481	7.422	8.74	3.283	3.49	8.159	2.921	9.391	7.012	7.887	2.945	2.888	11.89	15.3796	5.4488	9.4954	6.5244	3.0824	3.07423	1.859	3.77225
478	19.564	15.218	14.577	10.921	16.073	9.991	9.752	12.489	7.473	8.817	3.477	3.674	8.271	3.119	9.705	7.811	8.068	3.143	3.158	12.097	15.2706	5.6492	9.7044	6.8554	3.10161	3.09617	1.84425	3.78519
479	19.33	15.695	14.923	10.885	16.236	9.874	9.825	12.635	7.546	8.505	3.444	3.952	8.574	3.199	9.549	7.551	8.303	3.365	3.335	11.929	15.4138	5.7436	9.677	6.8966	3.03491	3.06044	1.91867	3.63622
480	19.622	15.457	14.619	10.796	16.221	9.568	9.934	12.33	7.412	8.726	3.756	3.489	8.557	3.171	9.912	7.923	8.122	3.04	3.12	12.36	15.343	5.777	9.594	6.913	3.17384	3.19911	1.81084	3.92233
481	19.56	15.293	14.594	10.811	16.459	9.832	10.05	12.055	7.445	8.234	3.373	3.78	9.089	3.153	10.114	7.776	8.255	3.352	3.079	12.297	15.3434	5.9018	9.5232	6.9518	3.16745	3.40418	1.78633	3.83751
482	19.414	15.687	14.522	10.905	16.096	9.599	9.897	12.433	7.452	8.567	3.725	3.711	8.695	3.31	10.289	8.432	8.15	3.242	2.901	12.238	15.3248	5.946	9.5896	6.9926	3.06703	3.28995	1.85705	3.92854
483	19.271	15.243	14.698	10.64	15.572	9.366	9.783	12.075	7.349	8.479	3.837	3.695	8.685	3.49	10.483	8.531	8.227	3.332	2.929	11.844	15.0848	6.038	9.4104	6.9726	3.06971	3.30117	1.75768	3.78607
484	19.325	15.21	14.788	10.516	15.635	9.681	9.913	12.183	7.166	8.232	3.835	3.716	8.502	3.253	10.448	8.844	8.316	3.034	3.075	11.929	15.0948	5.9508	9.435	7.0396	3.13286	3.29706	1.89974	3.89083
485	19.304	14.87	14.286	10.635	15.564	9.428	9.596	12.002	7.002	8.519	3.776	3.845	8.895	3.538	10.265	8.928	8.058	3.256	2.939	11.843	14.9318	6.0638	9.3094	7.0048	3.09835	3.24817	1.82312	3.83407
486	18.77	15.101	14.25	10.297	15.524	9.277	9.975	12.25	7.264	8.278	3.703	3.79	9.111	3.324	10.269	8.999	8.144	3.127	3.091	11.943	14.7884	6.0394	9.4088	7.0608	3.03951	3.36215	1.89006	3.87298
487	18.522	15.435	14.303	10.509	15.734	9.353	9.731	12.254	6.98	8.293	3.675	4.098	9.127	3.374	10.332	8.75	8.262	3.233	2.961	11.754	14.9006	6.1212	9.3222	6.992	2.90422	3.33129	1.95631	3.79997
488	19.018	14.911	14.14	10.285	15.397	9.179	9.244	11.862	6.988	8.08	4.125	3.912	9.053	3.368	10.193	9.594	8.35	3.021	2.833	11.955	14.7502	6.1302	9.0706	7.1506	3.12124	3.22568	1.8133	4.06775
489	18.471	14.801	13.732	10.187	15.29	9.257	9.853	11.652	6.835	8.045	3.931	3.527	8.778	3.367	10.084	9.27	7.535	2.756	2.635	11.16	14.4962	5.9374	9.1284	6.6712	2.98644	3.22901	1.82644	3.84932
490	18.44	14.846	13.809	10.629	15.859	9.111	9.624	11.769	7.469	8.798	3.958	4.063	9.322	3.775	10.545	10	7.669	3.048	2.888	11.905	14.7166	6.3326	9.3542	7.102	2.85997	3.31708	1.56737	4.06145
491	17.547	14.446	13.676	10.102	15.412	8.892	9.292	11.941	6.848	8.233	4.29	3.784	9.556	3.655	10.35	9.843	7.928	2.956	2.886	12.086	14.2366	6.327	9.0412	7.1398	2.72916	3.33042	1.86797	4.12288
492	17.553	14.521	14.203	10.494	15.153	9.129	9.406	11.924	7.336	8.634	4.294	3.796	9.154	3.689	11.035	9.891	8.041	2.996	2.772	12.445	14.3848	6.3936	9.2858	7.229	2.54055	3.45084	1.67524	4.26425
493	18.285	14.461	14.338	10.121	15.311	9.116	9.085	11.758	7.045	8.365	4.317	4.053	9.501	3.706	10.875	10.032	7.836	2.994	2.955	11.629	14.5032	6.4904	9.0738	7.0892	2.9235	3.41709	1.71939	3.9903
494	17.651	14.804	13.58	10.065	14.899	9.108	9.381	11.827	7.021	8.119	4.58	3.903	9.206	3.495	10.334	10.288	7.964	2.772	2.67	11.692	14.1998	6.3036	9.0912	7.0772	2.74979	3.21286	1.78884	4.19375
495	17.87	14.349	13.937	9.933	15.29	9.008	9.517	11.512	7.311	8.298	4.448	3.931	9.656	3.76	10.694	10.006	8.106	3.057	2.642	11.907	14.2758	6.4978	9.1292	7.1436	2.8691	3.3863	1.5684	4.14651
496	17.486	14.234	13.557	10.264	15.322	8.934	9.355	11.607	7.321	8.425	4.699	3.992	9.698	3.948	11.193	10.702	7.913	3.007	2.752	11.717	14.1726	6.706	9.1284	7.2182	2.64384	3.46719	1.58067	4.1994
497	17.733	14.563	13.755	10.085	15.248	8.894	9.304	11.409	7.064	8.513	4.86	3.81	9.781	3.604	10.69	11.06	7.971	3.089	2.66	12.227	14.2768	6.549	9.0368	7.4014	2.77551	3.414	1.57205	4.41797
498	17.959	14.626	14.021	10.027	14.86	8.75	9.322	11.847	7.156	8.632	5.017	3.908	9.352	3.813	10.831	11.202	7.772	3.032	2.946	11.874	14.2986	6.5842	9.1414	7.3652	2.83481	3.27848	1.7108	4.28724
499	17.237	14.469	13.546	9.952	14.843	8.717	9.568	11.348	7.151	8.205	4.908	3.856	9.731	3.812	10.871	11.101	7.686	2.846	2.672	11.844	14.0094	6.6356	8.9978	7.2298	2.64579	3.39866	1.5785	4.37254
500	18.256	14.725	13.901	9.98	14.952	9.138	9.904	11.488	7.019	8.28	4.866	3.695	10.238	3.865	11.515	11.46	7.721	3.062	2.981	12.164	14.3628	6.8358	9.1658	7.4776	2.96047	3.743	1.68313	4.40449
501	17.853	14.358	13.326	9.709	14.384	8.653	9.34	11.56	7.102	7.849	5.085	4.066	9.778	3.82	10.984	11.782	7.577	2.892	2.774	12.136	13.926	6.7466	8.9008	7.4322	2.9138	3.37848	1.70789	4.56562
502	17.659	14.155	13.492	9.779	15.013	8.588	9.293	11.25	7.05	8.582	5.041	4.035	10.203	4.227	11.158	11.518	7.849	2.757	2.479	12.082	14.0196	6.9328	8.9526	7.337	2.85094	3.45847	1.52349	4.60528
503	17.952	13.984	13.656	9.985	15.219	8.759	9.682	11.422	7.426	8.15	5.38	3.879	9.83	3.889	11.464	12.136	7.87	2.863	2.914	12.094	14.1592	6.8884	9.0878	7.5754	2.88168	3.53261	1.54521	4.61625
504	17.452	13.894	13.226	9.693	14.281	8.862	9.406	11.201	6.925	8.185	5.29	3.769	10.569	4.425	11.341	12.623	7.903	2.936	2.843	11.847	13.7092	7.0788	8.9158	7.6304	2.77187	3.58975	1.57819	4.68339
505	17.416	13.707	13.423	9.759	14.79	8.943	9.177	11.664	6.947	8.045	5.317	3.825	10.121	3.988	11.395	12.183	7.737	2.883	2.904	11.574	13.819	6.9292	8.9552	7.4562	2.76289	3.5713	1.74988	4.5004
506	17.341	13.716	13.329	9.776	14.319	8.382	9.333	11.673	7.234	8.545	5.782	4.291	10.482	3.924	11.903	12.664	7.748	2.468	2.912	11.777	13.6962	7.2764	9.0334	7.5138	2.70072	3.67647	1.65514	4.77993
507	17.327	13.797	13.17	9.533	14.62	8.116	9.247	11.245	7.001	8.047	5.586	3.9	10.53	3.923	11.458	13.01	7.369	2.957	2.593	11.815	13.6894	7.0794	8.7312	7.5488	2.81315	3.6531	1.61442	4.83999
508	16.562	13.773	13.215	9.652	14.418	8.481	9.194	11.674	6.836	8.064	5.794	3.882	10.68	4.113	11.337	12.979	7.373	2.903	2.915	12.36	13.524	7.1612	8.8498	7.706	2.50891	3.59629	1.79607	4.8887
509	17.465	13.946	13.386	9.903	14.479	8.456	9.574	11.329	6.871	7.989	5.731	4.059	10.573	4.428	12.256	13.118	7.391	3.067	2.733	11.757	13.8358	7.4094	8.8438	7.6132	2.70491	3.75596	1.69429	4.79603
510	16.299	13.408	13.111	9.267	14.32	8.1	9.246	11.446	7.196	8.321	6.299	3.737	10.465	4.278	11.77	12.908	7.808	2.622	2.863	12.344	13.281	7.3098	8.8618	7.709	2.56637	3.63411	1.61813	4.94681
511	16.867	13.447	13.239	9.504	14.084	8.365	9.32	11.621	6.804	8.314	6.126	4.237	11.256	4.683	11.812	13.07	7.89	2.886	3.08	11.978	13.4282	7.6228	8.8848	7.7808	2.63111	3.64335	1.77496	4.78698
512	16.796	14.078	13.185	9.131	13.964	8.189	8.951	10.897	7.249	8.248	6.513	4.037	10.991	4.263	11.977	13.834	8.028	2.838	2.544	12.268	13.4308	7.5562	8.7068	7.9024	2.7648	3.73027	1.36569	5.21102
513	15.91	13.473	12.981	9.447	14.24	7.525	8.946	10.579	6.583	8.303	6.556	4.138	11.206	4.473	11.895	13.449	8.018	3.098	2.807	11.884	13.2102	7.6536	8.3872	7.8512	2.37869	3.68407	1.51012	4.89039
514	16.404	13.472	12.993	9.085	14.203	8.1	9.446	11.102	6.871	8.128	6.697	4.172	10.524	4.227	12.071	13.829	7.899	2.548	2.414	11.84	13.2314	7.5382	8.7294	7.706	2.66067	3.62161	1.6089	5.22562
515	16.804	13.293	12.699	9.198	13.889	8.109	9.041	11.498	6.67	8.294	6.976	4.258	11.333	4.335	11.944	14.131	7.555	2.478	2.588	12.287	13.1766	7.7692	8.7224	7.8078	2.72656	3.70409	1.77325	5.37966
516	16.688	13.616	12.745	9.698	14.468	8.35	9.253	11.232	6.828	8.185	7.071	4.292	11.276	4.519	11.833	14.745	7.859	2.573	2.768	11.766	13.443	7.7982	8.7696	7.9422	2.55552	3.60382	1.62671	5.39692
517	16.199	12.846	13.039	9.485	13.65	7.583	9.104	11.123	7.151	8.083	6.857	4.02	11.059	4.699	12.033	14.926	7.801	2.746	2.861	11.958	13.0438	7.7336	8.6088	8.0584	2.39932	3.65073	1.58275	5.42383
518	16.349	13.033	13.064	9.399	14.078	8.615	9.508	10.962	7.055	8.079	7.206	3.854	11.317	4.726	12.483	14.783	7.432	2.645	2.409	12.272	13.1846	7.9172	8.8438	7.9082	2.50898	3.86019	1.48029	5.57842
519	16.45	13.491	12.711	8.864	13.892	7.968	8.836	10.94	6.829	7.928	6.903	4.049	11.168	4.772	12.07	14.413	7.804	2.836	2.748	12.05	13.0816	7.7924	8.5002	7.9702	2.74299	3.66126	1.53858	5.28709
520	16.009	13.344	12.77	9.107	14.108	8.118	9.161	10.919	7.197	8.26	7.358	4.121	11.257	4.732	12.258	15.137	7.594	3.043	2.566	11.736	13.0676	7.9452	8.731	8.0152	2.52911	3.70345	1.40739	5.45798
521	16.145	12.987	12.101	9.425	13.644	8.164	9.069	10.828	6.831	7.891	7.87	4.208	11.482	4.796	12.445	14.986	7.8	2.835	2.594	12.167	12.8604	8.1602	8.5566	8.0764	2.43912	3.75552	1.49972	5.52451
522	15.926	12.83	12.762	9.037	14.003	8.2	9.418	11.094	7.112	8.248	7.741	4.392	11.174	4.872	12.433	15.413	7.835	2.808	2.68	12.034	12.9116	8.1224	8.8144	8.154	2.51592	3.62353	1.51306	5.62125
523	16.022	13.015	12.437	9.402	13.938	8.147	9.529	11.249	7.225	8.3	7.86	4.469	11.737	4.979	12.628	15.669	7.794	2.748	2.773	12.229	12.9628	8.3346	8.89	8.2426	2.41186	3.75625	1.55287	5.73043
524	15.866	12.915	12.214	8.839	14.218	8.048	8.993	10.961	6.989	8.115	8.211	4.454	11.573	5.044	12.419	15.623	7.849	2.715	2.895	12.18	12.8104	8.3402	8.6212	8.2524	2.61996	3.64252	1.48844	5.68505
525	16.221	12.887	12.66	8.754	13.611	8.256	8.932	10.89	7.089	8.431	8.132	4.398	11.731	5.062	12.739	15.638	8.115	2.674	2.733	12.434	12.8266	8.4124	8.7196	8.3188	2.68117	3.77994	1.3886	5.77953
526	16.346	12.81	12.701	8.974	13.794	7.886	9.243	11.332	6.674	8.309	8.111	4.778	11.921	5.172	12.758	15.763	8.024	2.962	2.696	12.245	12.925	8.548	8.6888	8.338	2.65199	3.70481	1.74225	5.72773
527	15.527	12.971	12.039	8.07	13.837	7.574	8.994	10.423	6.595	7.625	8.06	4.165	11.665	5.053	12.221	15.825	7.875	2.842	2.615	11.867	12.4888	8.2328	8.2422	8.2048	2.78428	3.68693	1.48844	5.73571
528	15.447	12.595	12.307	8.784	13.431	7.881	9.441	10.697	7.239	7.888	8.198	4.353	11.801	5.405	12.804	16.095	7.417	2.682	2.661	12.35	12.5128	8.5122	8.6292	8.241	2.41897	3.75127	1.41215	5.94321
529	15.573	12.841	12.19	8.681	13.639	7.658	9.001	10.787	6.961	7.968	8.383	3.99	11.85	4.871	13.039	15.682	7.447	2.327	2.272	12.915	12.5848	8.4266	8.475	8.1286	2.52497	4.04109	1.4865	6.0907
530	15.275	12.353	12.069	8.69	13.517	7.83	8.78	10.77	6.759	8.103	8.52	4.62	11.707	5.136	12.908	16.178	7.558	2.77	2.557	12.138	12.3808	8.5782	8.4484	8.2402	2.41802	3.74353	1.48792	5.93483
531	15.653	12.753	12.091	8.662	13.123	7.409	9.203	10.702	6.965	7.76	8.391	4.68	12.23	5.466	12.85	16.407	7.675	2.983	2.608	11.889	12.4564	8.7234	8.4078	8.3124	2.51404	3.75484	1.53253	5.90897
532	14.988	12.007	11.833	8.434	12.935	7.616	9.173	10.8	7.007	7.715	8.537	4.412	11.504	5.369	12.065	16.09	7.069	2.454	2.578	12.146	12.0394	8.3774	8.4622	8.0674	2.37376	3.47039	1.52991	5.99245
533	15.48	12.028	12.246	8.814	13.441	7.418	8.624	10.31	6.958	8.002	8.407	4.276	11.866	5.012	12.803	16.479	7.624	2.568	2.411	12.246	12.4018	8.4728	8.2624	8.2656	2.42856	3.86843	1.30439	6.13299
534	15.202	12.929	12.005	8.487	13.287	7.376	8.998	10.724	7.026	8.161	8.85	4.71	11.862	5.233	12.905	16.388	7.327	2.442	2.202	12.23	12.382	8.712	8.457	8.1178	2.469	3.72969	1.47783	6.18755
535	14.901	12.104	11.947	8.262	12.662	7.669	8.925	10.457	6.947	8.003	8.724	4.6	11.924	5.228	12.631	16.152	7.474	2.654	2.504	11.958	11.9752	8.6214	8.4002	8.1484	2.38942	3.69734	1.35186	5.93871
536	14.736	12.43	12.459	8.836	12.896	7.508	8.759	10.781	6.999	7.823	9.178	4.68	11.676	5.347	13.104	17.171	7.52	3.05	2.621	12.241	12.2714	8.797	8.374	8.5206	2.14048	3.73618	1.49047	6.21299
537	14.962	12.041	11.927	8.515	13.2	7.846	9.172	10.425	6.555	7.769	8.833	4.735	12.241	5.713	12.364	16.752	7.774	2.607	2.646	11.807	12.129	8.7772	8.3534	8.3172	2.36022	3.5565	1.48281	6.09074
538	15.236	12.407	12.327	8.875	13.144	7.595	8.857	10.901	6.904	8.407	8.696	4.48	12.109	5.239	13.318	16.927	7.536	2.567	2.515	12.327	12.3978	8.7684	8.5328	8.3744	2.29278	3.95951	1.52166	6.27558
539	15.468	11.977	12.125	8.407	13.42	7.479	8.92	10.878	6.632	8.575	9.181	4.898	12.198	5.106	13.253	17.008	7.647	2.599	2.588	12.617	12.2794	8.9272	8.4968	8.4918	2.57774	3.88301	1.61003	6.32132
540	14.828	11.854	11.953	8.139	13.13	7.638	8.563	10.904	7.09	8.344	9.796	4.775	12.395	5.8	13.361	16.607	8.072	2.809	2.687	12.145	11.9808	9.2254	8.5078	8.464	2.45985	3.84105	1.46102	6.02836
541	14.712	11.756	12.012	8.556	12.757	6.887	9.091	10.522	6.937	7.49	9.321	4.957	12.112	5.617	12.937	17.061	7.717	2.564	2.857	12.012	11.9586	8.9888	8.1854	8.4422	2.22712	3.64271	1.58175	6.19073
542	14.351	11.994	11.514	8.387	13.084	7.071	8.865	9.74	6.765	8.501	9.363	4.709	12.218	5.13	12.688	17.03	7.497	2.8	2.862	12.318	11.866	8.8216	8.1884	8.5014	2.23061	3.78547	1.24876	6.17699
543	14.865	11.868	11.323	8.295	12.417	7.372	8.857	10.076	6.705	7.684	9.887	4.418	12.662	4.924	12.303	16.702	7.392	2.592	2.382	12.137	11.7536	8.8388	8.1388	8.241	2.36016	3.95555	1.33409	6.19934
544	14.759	11.287	11.847	7.911	13.071	7.087	8.492	9.866	6.624	7.785	9.438	4.558	12.188	5.497	12.591	16.581	7.715	2.572	2.45	12.087	11.775	8.8544	7.9708	8.281	2.5376	3.71305	1.27406	6.12963
545	14.088	11.586	11.378	7.976	12.899	7.121	8.571	10.369	7.091	8.026	9.876	5.059	12.61	5.706	13.098	16.683	7.735	2.554	2.603	12.413	11.5854	9.2698	8.2356	8.3976	2.29452	3.76202	1.34724	6.18335
546	14.676	12.167	11.428	7.598	12.758	7.723	9.109	9.799	7.125	7.461	9.977	4.447	12.336	5.355	12.87	16.506	7.507	2.211	2.415	12.012	11.7254	8.997	8.2434	8.1302	2.60246	3.90756	1.15141	6.19095
547	14.938	12.255	11.365	8.169	12.895	7.288	9.223	10.316	6.614	8.144	9.374	4.723	11.755	5.489	13.216	17.659	7.385	2.603	2.721	12.154	11.9244	8.9114	8.317	8.5044	2.47735	3.7445	1.48373	6.45472
548	13.922	11.015	11.771	8.346	12.426	6.772	8.56	10.658	6.85	7.765	9.789	5.004	12.262	5.473	13.588	17.145	7.482	2.666	2.537	12.685	11.496	9.2232	8.121	8.503	2.06033	3.88817	1.59617	6.38121
549	14.675	11.526	11.524	8.447	12.785	7.008	8.651	10.142	6.861	8.472	9.866	4.76	11.998	5.46	13.266	16.516	7.834	2.489	2.443	12.449	11.7914	9.07	8.2268	8.3462	2.27098	3.8217	1.34712	6.18457
550	14.066	11.682	11.837	8.518	12.567	7.002	8.737	10.195	6.937	7.871	9.831	5.32	12.769	5.964	13.31	17.321	7.975	2.818	2.841	12.831	11.734	9.4388	8.1484	8.7572	2.03028	3.71716	1.35957	6.34078
551	14.205	11.575	10.983	8.074	12.384	7.225	8.86	10.401	6.839	7.884	9.755	4.731	12.179	5.365	13.417	17.325	7.312	2.23	2.547	12.657	11.4442	9.0894	8.2418	8.4142	2.24128	3.92376	1.42952	6.54383
552	14.105	11.196	11.211	8.062	12.445	6.713	9.002	10.219	6.724	7.774	10.175	4.904	12.416	5.867	12.757	17.259	7.434	2.81	2.698	11.949	11.4038	9.2238	8.0864	8.43	2.21521	3.65743	1.51874	6.24033
553	14.792	11.45	11.6	8.316	12.66	7.306	8.947	10.354	7.023	8.048	9.484	5.176	12.566	5.813	13.638	17.412	7.267	2.739	2.247	12.369	11.7636	9.3354	8.3356	8.4068	2.34445	3.83012	1.35217	6.4838
554	14.098	11.3	11.035	8.319	12.484	7.055	8.489	10.316	7.018	7.977	10.271	4.821	12.535	5.652	13.431	17.258	7.292	2.593	2.183	12.473	11.4472	9.342	8.171	8.3598	2.12596	3.93172	1.35228	6.49318
555	14.303	11.822	11.265	8.29	12.298	7.11	9.233	9.97	7.12	8.119	10.092	4.846	12.369	5.457	13.468	17.578	7.502	2.545	2.523	12.321	11.5956	9.2464	8.3104	8.4938	2.17433	3.93734	1.27477	6.5037
556	13.846	11.493	11.232	7.858	11.787	6.905	8.532	9.715	6.805	7.994	10.348	5.014	12.436	5.504	13.225	17.617	7.106	2.572	2.572	11.741	11.2432	9.3054	7.9902	8.3216	2.15594	3.8444	1.20943	6.43604
557	13.959	11.055	11.189	8.189	12.362	7.062	8.408	10.005	6.632	8.166	10.331	5.088	12.142	5.656	13.941	17.225	7.709	2.238	2.37	12.362	11.3508	9.4316	8.0546	8.3808	2.11754	3.92466	1.31818	6.48816
558	14.071	11.196	11.047	7.753	12.278	6.622	8.648	9.916	6.965	7.786	10.245	4.992	12.363	5.929	13.021	17.132	7.65	2.432	2.808	12.223	11.269	9.31	7.9874	8.449	2.30685	3.67569	1.33286	6.29089
559	14.068	10.889	10.841	7.275	12.177	6.804	8.388	9.969	6.591	7.894	10.451	5.758	12.516	6.29	13.226	16.756	7.961	2.948	2.576	11.945	11.05	9.6482	7.9292	8.4372	2.48489	3.46701	1.36284	6.04605
560	13.371	10.995	10.824	8.214	11.881	6.777	8.732	9.921	6.805	7.906	9.962	4.898	12.787	5.856	13.103	17.534	7.677	2.417	2.768	12.343	11.057	9.3212	8.0282	8.5478	1.88244	3.81761	1.33741	6.45961
561	13.736	11.136	11.224	8.046	12.255	6.981	8.673	9.964	7.059	8.21	9.963	5.502	12.626	5.976	13.121	17.628	7.673	2.825	2.551	12.277	11.2794	9.4376	8.1774	8.5908	2.08957	3.58751	1.23701	6.43865
562	13.292	11.064	10.744	7.704	11.823	6.741	8.635	10.134	6.44	8.282	10.842	5.276	12.714	5.927	13.011	17.426	7.721	2.685	2.57	12.117	10.9254	9.554	8.0464	8.5038	2.05159	3.70985	1.50371	6.37068
563	13.668	11.722	10.598	7.838	11.925	6.684	8.407	9.779	7.084	7.342	10.577	5.163	12.918	6.114	13.154	17.436	7.765	2.561	2.644	12.119	11.1502	9.5852	7.8592	8.505	2.15303	3.75608	1.24852	6.38463
564	13.763	10.658	11.175	8.227	12.19	6.499	8.606	10.397	7.018	8.184	11.116	5.603	12.449	5.937	13.539	18.063	7.484	2.686	2.634	12.578	11.2026	9.7288	8.1408	8.689	2.04219	3.71623	1.52192	6.65483
565	13.654	11.332	11.019	7.914	12.011	7.032	8.612	10.534	7.062	8.248	10.708	5.263	12.332	5.717	13.423	17.537	7.348	2.343	2.208	12.787	11.186	9.4886	8.2976	8.4446	2.09325	3.77929	1.43451	6.68684
566	13.645	11.195	11.433	7.758	12.035	6.845	8.954	10.101	6.963	7.78	10.632	5.178	12.234	6.189	13.142	18.078	7.603	2.723	2.393	12.616	11.2132	9.475	8.1286	8.6826	2.155	3.59373	1.38739	6.70795
567	13.148	11.311	10.976	8.009	11.58	6.962	8.885	9.927	6.844	7.861	10.79	5.062	12.01	5.687	13.275	18.504	7.623	2.491	2.319	12.639	11.0048	9.3648	8.0958	8.7152	1.8704	3.75361	1.31185	6.92932
568	12.685	10.223	11.101	7.815	11.88	6.618	8.28	10.384	6.919	8.425	10.906	5.354	12.515	6.121	13.07	17.476	7.394	2.515	2.434	12.691	10.7408	9.5932	8.1252	8.502	1.87322	3.61855	1.49521	6.55692
569	13.179	10.859	10.888	7.595	11.919	6.724	8.797	10.117	7.179	8.023	10.363	5.583	12.514	6.227	13.482	18.264	7.786	2.374	2.505	12.294	10.888	9.6338	8.168	8.6446	2.07101	3.59344	1.34894	6.77501
570	13.06	10.867	10.322	7.349	11.424	6.944	8.771	9.626	6.788	8.035	11.213	5.041	12.137	5.875	13.17	17.985	7.443	2.54	2.521	12.287	10.6044	9.4872	8.0328	8.5552	2.08854	3.75432	1.20605	6.64603
571	13.237	10.839	10.55	7.384	11.364	7.034	8.792	9.91	6.765	7.724	10.763	5.554	12.541	5.959	12.963	17.939	7.501	2.708	2.52	12.499	10.6748	9.556	8.045	8.6334	2.11611	3.56823	1.30382	6.62011
572	12.937	10.923	10.866	7.682	12.148	6.714	8.887	9.895	7.082	8.106	10.729	5.37	12.084	6.535	13.337	18.79	7.362	2.6	2.162	12.541	10.9112	9.611	8.1368	8.691	2.00396	3.48915	1.30307	7.04107
573	12.88	10.668	10.65	7.698	11.542	6.868	8.625	10.076	6.991	8.077	10.776	5.409	12.602	6.198	13.52	17.384	7.41	2.828	2.463	12.177	10.6876	9.701	8.1274	8.4524	1.90238	3.70299	1.31574	6.36866
574	12.67	11.153	10.802	7.315	11.934	6.582	8.583	9.846	7.191	8.097	11.049	5.556	12.131	6.32	13.241	18	7.516	2.362	2.695	12.85	10.7748	9.6594	8.0598	8.6846	2.06455	3.49489	1.26534	6.73319
575	12.733	10.395	10.679	7.796	11.828	6.593	8.583	10.012	7.037	8.268	11.123	5.828	12.517	6.303	13.623	18.615	7.392	2.484	2.513	12.403	10.6862	9.8788	8.0986	8.6814	1.86623	3.59592	1.35261	6.90373
576	13.234	10.613	10.539	7.425	11.604	7.18	8.865	9.798	7.08	8.013	11.334	5.275	12.112	6.375	13.196	18.613	7.75	2.367	2.328	12.618	10.683	9.6584	8.1872	8.7352	2.12109	3.5825	1.15377	6.98613
577	13.157	10.827	10.18	7.546	11.31	6.563	8.841	9.594	6.759	8.263	11.2	5.673	12.584	6.004	13.479	17.947	7.506	2.339	2.525	12.772	10.604	9.788	8.004	8.6178	2.03698	3.69752	1.31551	6.74672
578	13.049	10.533	10.336	7.193	11.556	6.702	8.498	9.742	6.649	8.342	11.592	5.82	12.95	6.431	13.752	18.013	7.877	2.687	2.823	13.107	10.5334	10.109	7.9866	8.9014	2.15472	3.72375	1.31421	6.65814
579	12.814	10.892	10.598	7.294	11.204	6.397	8.918	9.992	6.809	7.618	11.063	5.935	12.017	6.207	13.69	18.124	7.674	2.73	2.555	12.275	10.5604	9.7824	7.9468	8.6716	2.01703	3.51741	1.49421	6.63406
580	12.641	10.701	10.633	7.47	11.325	6.829	8.78	9.488	6.707	7.771	11.474	5.476	12.431	6.221	13.112	18.952	7.67	2.145	2.42	12.51	10.554	9.7428	7.915	8.7394	1.90322	3.61191	1.21264	7.12529
581	12.676	10.039	10.463	7.534	11.537	6.573	8.505	9.932	7.123	8.287	11.378	5.78	12.633	6.144	13.383	18.06	7.601	2.406	2.444	13.042	10.4498	9.8636	8.084	8.7106	1.92411	3.63526	1.30769	6.82682
582	12.083	10.539	9.99	7.641	11.179	6.508	8.425	9.96	6.845	7.661	11.051	5.558	12.448	6.229	13.256	18.314	7.385	2.517	2.381	12.419	10.2864	9.7084	7.8798	8.6032	1.6714	3.5786	1.38067	6.82095
583	12.88	10.19	10.055	7.071	11.147	6.569	8.794	9.654	6.99	8.072	11.198	5.977	12.575	6.015	13.66	18.637	7.775	2.429	2.582	12.799	10.2686	9.885	8.0158	8.8444	2.1135	3.65582	1.26866	6.94717
584	12.575	10.299	9.981	7.203	10.914	6.272	8.455	9.555	6.886	8.453	11.534	5.833	12.426	6.394	13.384	18.092	7.659	2.512	2.455	12.233	10.1944	9.9142	7.9242	8.5902	1.94872	3.53626	1.32557	6.68967
585	12.381	10.349	10.093	7.123	11.464	6.335	8.533	9.458	6.994	7.699	11.727	5.607	12.553	6.114	13.382	18.244	7.405	2.268	2.239	13.113	10.282	9.8766	7.8038	8.6538	1.98887	3.71691	1.23412	6.98828
586	12.066	10.591	10.169	7.045	11.214	6.463	8.461	9.264	6.856	8.169	11.809	5.907	12.756	6.234	13.294	18.48	7.53	2.517	2.497	12.677	10.217	10	7.8426	8.7402	1.91158	3.62815	1.16039	6.88354
587	12.404	9.929	10.215	7.168	11.228	6.335	8.05	9.54	7.346	8.567	11.592	5.766	12.462	6.37	13.382	18.195	7.598	2.638	2.513	12.757	10.1888	9.9144	7.9676	8.7402	1.94811	3.57424	1.2135	6.76105
588	12.184	10.06	10.188	7.363	11.015	6.641	8.735	9.613	6.849	8.201	11.415	5.502	12.131	5.966	13.819	18.248	7.481	2.235	2.339	12.861	10.162	9.7666	8.0078	8.6328	1.77916	3.78685	1.26033	6.93181
589	12.248	9.848	9.757	7.033	10.976	6.109	8.418	9.539	7.023	8.143	11.659	6.153	12.058	6.516	13.541	19.156	7.395	2.408	2.226	12.868	9.9724	9.9854	7.8464	8.8106	1.92922	3.40819	1.32062	7.243
590	11.841	10.371	10.103	6.891	11.29	6.589	8.418	9.574	6.692	7.59	11.832	6.09	12.392	6.186	12.805	18.299	7.235	2.28	2.415	12.746	10.0992	9.861	7.7726	8.595	1.92473	3.41628	1.25135	6.91592
591	12.225	10.052	10.104	7.173	10.904	6.579	8.488	9.674	7.023	7.763	12.096	6.24	12.355	6.589	13.285	18.072	8.149	2.568	2.781	12.925	10.0916	10.113	7.9054	8.899	1.85279	3.40731	1.22736	6.67882
592	12.41	9.76	10.256	7.725	11.218	6.678	8.773	9.507	6.986	8.535	11.434	5.702	12.493	6.636	13.719	18.413	7.638	2.389	2.427	13.213	10.2738	9.9968	8.0958	8.816	1.74754	3.60179	1.21293	6.98121
593	12.012	9.635	10.246	7.172	11.04	6.732	8.482	9.613	7.142	8.217	11.756	5.955	12.669	6.695	13.34	18.276	7.809	2.324	2.526	12.767	10.021	10.083	8.0372	8.7404	1.82475	3.48616	1.14217	6.85196
594	12.072	9.799	10.191	7.108	11.202	6.026	8.401	9.45	6.557	7.909	11.696	6.035	12.263	6.622	13.405	18.581	7.874	2.503	2.493	12.904	10.0744	10.0042	7.6686	8.871	1.88088	3.41773	1.38757	6.94214
595	12.116	9.596	10.198	6.906	10.839	6.294	8.382	9.307	7.116	7.976	11.893	6.197	12.51	6.62	12.94	18.563	7.523	2.671	2.623	12.81	9.931	10.032	7.815	8.838	1.93215	3.33201	1.15926	6.86913
596	12.269	9.907	10.106	6.989	10.953	6.021	8.756	9.662	7.121	7.968	11.703	6.147	12.38	6.127	13.797	18.447	7.811	2.468	2.226	12.829	10.0448	10.0308	7.9056	8.7562	1.94503	3.63397	1.41239	6.95661
597	12.237	9.743	9.869	6.996	10.827	6.527	8.539	9.163	6.925	7.984	11.7	6.336	12.89	6.761	13.538	18.746	7.6	2.438	2.685	12.732	9.9344	10.245	7.8276	8.8402	1.92184	3.44149	1.09774	6.95852
598	11.755	9.518	9.864	6.89	10.935	5.979	8.389	9.755	7.069	8.01	11.848	6.202	12.538	6.5	13.136	18.427	7.731	2.635	2.702	12.868	9.7924	10.0448	7.8404	8.8726	1.84809	3.40426	1.41909	6.8106
599	12.211	9.975	9.809	7.036	10.574	6.307	8.481	9.491	7.096	7.881	12.015	6.643	12.873	6.528	13.586	18.763	7.902	2.461	2.5	12.9	9.921	10.329	7.8512	8.9052	1.87144	3.46254	1.22896	7.01241
600	11.484	9.575	9.836	6.767	10.786	6.135	8.228	9.706	6.637	8.157	11.984	6.017	12.47	6.801	13.465	18.463	7.749	2.506	2.428	12.775	9.6896	10.1474	7.7726	8.7842	1.80265	3.46528	1.4199	6.90098
601	12.109	9.421	9.242	6.757	10.345	6.065	8.556	9.291	7.075	8	11.803	6.059	12.637	6.453	13.217	18.344	7.632	2.522	2.79	12.799	9.5748	10.0338	7.7974	8.8174	1.94228	3.48786	1.26199	6.78189
602	11.975	9.866	10.173	6.96	11.14	6.317	8.436	9.448	7.01	8.149	11.906	6.205	12.391	6.532	13.93	18.366	8.023	2.492	2.588	13.114	10.0228	10.1928	7.872	8.9166	1.9031	3.57204	1.22879	6.87449
603	11.455	9.583	9.616	6.584	10.314	5.849	8.616	9.626	6.813	8.19	11.88	6.24	12.905	6.917	13.287	18.771	7.449	2.273	2.506	12.638	9.5104	10.2458	7.8188	8.7274	1.80329	3.39552	1.49424	7.03857
604	11.719	9.706	9.474	6.854	11.068	6.265	8.885	9.623	7.432	7.94	11.825	6.441	12.506	6.219	13.509	18.473	7.644	2.436	2.542	12.901	9.7642	10.1	8.029	8.7992	1.87603	3.49414	1.299	6.91709
605	11.203	9.814	9.509	6.577	10.737	6.479	8.689	9.192	7.072	7.676	12.174	6.657	12.455	6.17	13.282	18.6	7.517	2.264	2.531	12.847	9.568	10.1476	7.8216	8.7518	1.80623	3.43731	1.11983	7.00129
606	11.629	9.579	9.779	6.838	10.366	5.804	8.25	9.183	6.937	8.13	12.237	6.418	12.826	6.723	13.288	19.126	7.487	2.502	2.493	12.88	9.6382	10.2984	7.6608	8.8976	1.75766	3.42511	1.3092	7.14829
607	11.661	9.534	9.759	6.789	10.481	6.044	8.578	9.353	7.096	8.244	12.458	6.028	12.818	6.58	13.51	18.45	7.79	2.533	2.609	13.054	9.6448	10.2788	7.863	8.8872	1.79897	3.65334	1.3013	6.88848
608	11.779	9.478	9.426	6.706	10.612	5.373	8.667	9.576	6.656	8.659	11.956	6.378	11.851	6.635	13.362	18.505	7.758	2.437	2.618	12.664	9.6002	10.0364	7.7862	8.7964	1.88365	3.27836	1.7206	6.87219
609	11.267	8.915	9.447	6.574	10.077	5.689	8.322	9.23	6.662	7.764	12.158	6.371	12.601	6.609	13.245	18.455	7.642	2.56	2.702	13.058	9.256	10.1968	7.5334	8.8834	1.73667	3.40687	1.38876	6.86984
610	11.48	9.738	9.526	6.758	10.67	6.283	8.549	9.125	6.866	7.795	11.724	6.594	11.893	6.489	13.105	18.091	7.423	2.63	2.687	13.174	9.6344	9.961	7.7236	8.801	1.7871	3.1669	1.16845	6.75996
611	11.325	9.612	9.229	6.52	10.066	6.008	8.601	9.485	6.835	7.998	12.273	6.375	12.495	6.828	13.454	18.386	7.509	2.248	2.569	12.834	9.3504	10.285	7.7854	8.7092	1.76815	3.3955	1.38397	6.91997
612	11.142	9.664	9.601	6.732	10.524	6.544	8.573	9.204	7.178	8.042	11.957	6.519	12.398	6.896	13.344	18.172	8.055	2.515	2.496	13.433	9.5326	10.2228	7.9082	8.9342	1.69103	3.25064	1.06456	6.87397
613	11.365	9.183	9.473	6.728	10.176	5.687	8.203	9.711	7.006	8.314	12.075	6.278	12.855	6.788	13.565	17.895	7.49	2.471	2.259	13.05	9.385	10.3122	7.7842	8.633	1.70692	3.49459	1.51431	6.80439
614	11.303	9.213	9.489	6.486	10.317	5.772	8.533	9.848	7.174	8.122	12.16	6.337	12.135	6.923	13.61	18.484	7.614	2.194	2.497	13.231	9.3616	10.233	7.8898	8.804	1.80203	3.34925	1.52476	7.03895
615	11.236	9.027	9.375	6.474	10.382	6.152	8.512	9.356	7.214	7.777	12.209	6.224	12.381	6.625	13.303	18.07	7.789	2.425	2.339	12.731	9.2988	10.1484	7.8022	8.6708	1.80175	3.42773	1.22351	6.79539
616	11.096	9.815	9.275	6.652	10.285	5.95	8.788	9.127	7.098	7.989	12.062	6.658	12.394	6.86	13.552	18.431	7.648	2.431	2.738	12.79	9.4246	10.3052	7.7904	8.8076	1.6879	3.28491	1.29302	6.84315
617	11.66	9.411	9.429	6.749	10.501	6.007	8.449	9.132	6.958	8.596	11.917	6.554	12.152	7.014	13.28	18.477	7.588	2.488	2.555	12.814	9.55	10.1834	7.8284	8.7844	1.81907	3.14989	1.29892	6.89321
618	11.039	9.36	9.145	6.639	10.19	6.041	8.297	9.569	6.619	8.099	12.414	6.469	12.163	6.507	13.101	18.064	7.415	2.374	2.251	12.992	9.2746	10.1308	7.725	8.6192	1.65239	3.34311	1.4077	6.8799
619	11.028	9.555	9.545	6.713	10.178	5.95	8.834	9.426	7.446	8.307	12.415	6.487	12.063	7.057	13.01	18.43	7.618	2.441	2.622	13.238	9.4038	10.2064	7.9926	8.8698	1.62177	3.15981	1.35392	6.9356
620	10.847	8.99	9.098	6.148	10.065	5.865	8.767	9.187	6.759	8.013	12.271	6.492	12.265	6.69	12.749	18.244	7.389	2.079	2.391	12.887	9.0296	10.0934	7.7182	8.598	1.78079	3.20403	1.38732	6.96288
621	10.956	9.303	9.179	6.794	10.151	6.233	7.987	9.37	7.255	8.097	12.553	6.583	12.392	6.602	13.679	18.594	7.598	2.31	2.32	13.458	9.2766	10.3618	7.7884	8.856	1.56193	3.47643	1.15541	7.12669
622	11.313	9.26	9.387	6.435	10.076	5.733	8.609	9.128	6.854	8.011	12.464	6.742	12.621	6.915	13.677	18.599	7.596	2.446	2.589	12.729	9.2942	10.4838	7.667	8.7918	1.79385	3.36982	1.37309	6.92561
623	10.845	8.922	9.166	6.348	10.249	5.801	8.236	9.567	7.03	8.043	12.426	6.909	12.61	7.091	13.247	18.389	7.647	2.434	2.578	12.936	9.106	10.4566	7.7354	8.7968	1.73022	3.17075	1.40885	6.8852
624	11.093	9.44	9.275	6.521	10.237	5.832	9.138	9.032	7.199	8.465	12.455	6.617	12.474	6.79	13.447	18.476	7.8	2.568	2.481	13.123	9.3132	10.3566	7.9332	8.8896	1.7201	3.35941	1.40497	6.92894
625	10.577	9.445	9.192	5.901	9.542	6.029	8.242	9.042	6.671	8.152	12.493	7.346	12.927	7.141	13.693	18.354	7.893	2.361	2.507	12.953	8.9314	10.72	7.6272	8.8136	1.77453	3.20337	1.2373	6.89947
626	10.629	8.758	8.984	6.34	10.075	5.984	8.468	9.106	6.945	8.258	12.72	6.851	12.418	6.706	13.426	18.287	7.449	2.518	2.335	13.315	8.9572	10.4242	7.7522	8.7808	1.65337	3.34849	1.26284	6.9547
627	10.871	9.098	9.13	6.567	9.967	5.788	8.361	9.212	6.883	7.915	12.633	7.163	12.049	6.938	13.409	17.966	7.779	2.355	2.502	13.297	9.1266	10.4384	7.6318	8.7798	1.6048	3.13113	1.3294	6.82792
628	10.798	8.608	8.899	6.344	10.019	5.711	8.68	8.95	7.158	8.38	12.645	7.302	12.535	6.942	13.4	18.699	7.836	2.33	2.592	13.573	8.9336	10.5648	7.7758	9.006	1.69317	3.16298	1.34224	7.10438
629	10.559	8.854	8.813	6.392	9.943	5.6	8.451	9.153	7.312	8.353	12.843	7.116	12.067	7.009	13.204	18.931	7.524	2.272	2.495	12.914	8.9122	10.4478	7.7738	8.8272	1.5921	3.11776	1.38157	7.13363
630	10.515	9.162	9.081	6.404	10.225	5.726	8.506	9.428	7.089	7.916	12.353	7.31	12.19	7.29	13.555	18.529	7.999	2.273	2.765	13.115	9.0774	10.5396	7.733	8.9362	1.62311	3.00396	1.40951	6.94342
631	11.124	8.47	8.671	6.141	9.63	6.16	8.97	9.487	7.028	7.916	12.351	7.28	12.449	7.465	13.394	18.467	7.778	2.365	2.638	13.139	8.8072	10.5878	7.9122	8.8774	1.82246	2.964	1.36482	6.94031
632	10.55	8.952	8.999	6.193	9.467	6.286	8.071	9.02	7.372	8.074	11.819	7.357	12.31	6.641	13.413	18.533	7.808	2.03	2.648	12.975	8.8322	10.308	7.7646	8.7988	1.60945	3.08575	1.01317	7.01473
633	10.489	8.95	8.742	5.978	9.479	5.52	8.649	8.721	7.739	8.036	12.247	6.844	11.848	7.2	13.348	18.361	7.813	2.314	2.453	12.693	8.7276	10.2974	7.733	8.7268	1.67907	3.04267	1.30426	6.88963
634	10.619	8.762	8.839	6.312	9.872	5.445	8.929	9.146	7.315	7.754	12.687	7.478	12.224	7.34	13.821	18.479	7.812	2.545	2.702	13.105	8.8808	10.71	7.7178	8.9286	1.6293	3.06927	1.48627	6.8815
635	10.881	8.857	8.715	6.107	9.326	5.912	8.543	8.871	7.235	8.074	12.942	7.103	11.48	7.203	13.808	18.259	7.581	2.129	2.477	12.908	8.7772	10.5072	7.727	8.6708	1.72245	3.17318	1.18652	6.93241
636	10.721	8.673	8.872	5.813	9.657	5.904	8.422	8.944	6.914	8.209	12.738	7.374	12.113	7.127	13.329	18.151	7.522	2.053	2.577	12.91	8.7472	10.5362	7.6786	8.6426	1.82717	3.03134	1.24188	6.89366
637	10.993	8.832	8.444	6.341	9.659	5.696	8.644	8.75	6.974	8.362	12.644	7.639	11.941	7.031	12.967	18.401	7.718	2.251	2.44	13.028	8.8538	10.4444	7.6852	8.7676	1.71078	2.87068	1.3204	6.97423
638	10.276	8.897	8.538	6.022	9.311	5.854	8.473	8.909	7.239	8.043	12.975	7.49	12.243	7.233	13.415	18.7	7.856	2.184	2.49	13.147	8.6088	10.6712	7.7036	8.8754	1.58526	3.05155	1.20385	7.09501
639	10.373	8.414	8.799	5.842	9.799	5.663	8.467	9.299	7.446	7.925	12.564	7.654	11.606	7.004	13.444	18.232	7.514	2.181	2.641	13.204	8.6454	10.4544	7.76	8.7544	1.75011	2.93521	1.35937	6.92361
640	10.025	8.477	8.854	6.297	9.598	5.824	8.18	9.336	7.24	8.445	13.006	7.694	12.174	7.011	13.611	18.773	8.256	2.29	2.581	13.045	8.6502	10.6992	7.805	8.989	1.44892	3.10681	1.33583	7.04724
641	10.357	8.221	8.663	6.177	9.649	5.734	8.136	8.894	7.184	7.971	12.934	7.7	12.031	7.103	13.665	18.734	7.953	2.358	2.833	13.131	8.6134	10.6866	7.5838	9.0018	1.59727	3.0615	1.19928	6.9832
642	10.517	8.495	8.644	6.126	9.465	5.429	8.303	8.841	7.416	7.916	13.159	7.781	12.33	7.572	13.886	18.431	7.831	2.354	2.554	13.304	8.6494	10.9456	7.581	8.8948	1.62362	3.03552	1.31143	6.97316
643	10.154	8.606	8.71	5.873	9.561	5.456	8.281	9.277	7.586	8.195	13.382	7.669	12.451	6.997	14.058	18.241	7.84	2.396	2.496	13.08	8.5808	10.9114	7.759	8.8106	1.64205	3.32457	1.42308	6.87611
644	10.647	8.271	8.679	6.336	9.541	5.561	8.455	8.721	7.334	8.248	13.128	8.234	11.989	7.713	13.996	18.843	8.346	2.469	2.796	13.303	8.6948	11.012	7.6638	9.1514	1.60241	2.86954	1.28603	7.01529
645	10.46	8.444	8.329	6.228	9.033	5.78	8.595	8.833	6.354	8.413	13.25	8.076	12.467	7.454	13.37	18.826	7.402	2.42	2.44	13.066	8.4988	10.9234	7.595	8.8308	1.52644	2.9123	1.4174	7.10322
646	10.314	8.358	8.595	5.95	9.36	6.054	8.738	9.127	7.002	8.404	13.228	7.793	11.7	7.073	14.142	18.206	7.478	2.07	2.303	13.568	8.5154	10.7872	7.865	8.725	1.62486	3.19398	1.2913	7.07867
647	10.067	8.502	8.515	5.983	9.274	5.87	8.47	9.209	7.147	8.376	12.941	7.821	12.009	7.995	14.113	18.746	8.109	2.212	2.665	13.376	8.4682	10.9758	7.8144	9.0216	1.53175	2.89868	1.31494	7.0911
648	10.41	8.345	8.035	6.027	9.329	5.48	8.367	8.719	6.773	8.477	13.328	8.041	11.768	7.616	14.009	19.182	7.869	2.39	2.664	13.368	8.4292	10.9524	7.5632	9.0946	1.63296	2.96898	1.39473	7.20805
649	9.867	8.362	8.491	6.03	9.237	5.713	8.406	8.918	6.915	8.033	13.754	8.265	12.265	7.663	13.776	18.605	8.306	2.286	2.327	13.616	8.3974	11.1446	7.597	9.028	1.45596	2.97499	1.28493	7.13526
650	9.786	8.692	8.507	6.225	9.15	5.642	8.67	9.204	7.211	8.132	13.525	8.203	11.739	7.741	14.904	18.717	8.337	2.148	2.806	13.522	8.472	11.2224	7.7718	9.106	1.34953	3.17647	1.39984	7.08109
651	9.651	8.165	8.337	5.994	9.093	5.662	8.482	8.812	6.911	8.369	13.467	8.089	11.88	7.592	13.639	19	7.917	2.159	2.473	13.283	8.248	10.9334	7.6472	8.9664	1.39443	2.9108	1.32831	7.2269
652	10.338	8.771	8.26	5.955	9.337	5.616	7.921	8.708	7.022	7.961	13.397	8.851	12.198	8.019	14.321	18.711	8.584	2.321	2.659	13.179	8.5322	11.3572	7.4456	9.0908	1.63414	2.78731	1.1845	7.01279
653	10.388	8.531	8.522	5.976	9.31	5.68	7.824	8.932	7.292	8.047	13.981	8.477	11.797	7.59	14.142	18.919	7.734	2.248	2.568	13.258	8.5454	11.1974	7.555	8.9454	1.62653	3.04928	1.20368	7.16005
654	9.614	8.126	8.243	5.783	9.376	5.336	8.379	8.783	7.046	8.405	13.682	8.629	11.897	7.887	13.66	18.938	8	2.268	2.649	12.98	8.2284	11.151	7.5898	8.967	1.51884	2.75099	1.42183	7.0932
655	9.798	7.957	8.515	5.944	9.019	5.534	8.259	9.42	7.271	8.484	13.42	8.501	11.785	7.707	14.017	19.022	8.099	2	2.647	13.554	8.2466	11.086	7.7936	9.0644	1.45442	2.85599	1.47626	7.26862
656	10.298	8.475	8.253	5.734	8.906	5.934	8.601	8.885	7.061	8.429	14.127	8.976	12.048	8.042	13.675	18.503	7.913	2.495	2.634	13.499	8.3332	11.3736	7.782	9.0088	1.65612	2.74684	1.24909	6.97442
657	9.784	8.005	7.867	5.688	8.881	5.337	8.406	8.587	6.811	7.966	13.989	8.391	12.312	7.976	13.839	18.916	7.707	2.489	2.718	13.305	8.045	11.3014	7.4214	9.027	1.52576	2.92458	1.3548	7.07787
658	9.368	7.905	8.316	5.903	9.218	5.438	8.207	9.077	7.381	8.327	14.479	8.482	11.984	8.241	14.165	18.88	8.576	2.6	3.093	13.186	8.142	11.4702	7.686	9.267	1.39288	2.99733	1.39317	6.90675
659	9.604	8.254	8.079	5.741	8.694	5.577	8.332	9.034	7.739	8.408	14.593	9.199	12.078	8.585	14.863	19.948	8.627	2.202	2.826	13.447	8.0744	11.8636	7.818	9.41	1.43184	2.93007	1.3341	7.47101
660	9.654	7.719	8.382	5.885	9.064	5.784	8.67	8.976	7.37	8.382	14.38	9.001	11.966	8.076	14.025	19.686	8.139	2.24	2.881	13.035	8.1408	11.4896	7.8364	9.1962	1.45489	2.86598	1.29626	7.31711
661	10.062	8.437	8.338	5.503	8.768	5.577	8.537	9.011	7.191	8.128	14.265	8.808	12.515	8.127	13.753	19.262	8.254	2.364	2.854	13.147	8.2216	11.4936	7.6888	9.1762	1.66856	2.84496	1.35721	7.15397
662	9.905	8.265	7.926	5.627	9.338	5.717	8.265	8.703	6.754	8.363	14.266	8.979	12.28	8.686	14.143	19.301	7.869	2.158	2.902	13.246	8.2122	11.6708	7.5604	9.0952	1.65083	2.70983	1.27422	7.23484
663	9.79	7.892	8.033	5.549	8.868	6.094	8.214	8.495	7.363	8.088	14.439	8.972	12.026	8.482	14.802	19.287	8.323	2.448	2.458	13.352	8.0264	11.7442	7.6508	9.1736	1.5791	2.95882	0.965332	7.25941
664	9.896	8.12	7.918	5.509	8.553	5.909	8.533	8.674	7.305	8.247	14.381	9.523	11.856	8.987	13.942	19.42	7.904	2.239	2.449	13.503	7.9992	11.7378	7.7336	9.103	1.59113	2.46633	1.15107	7.39304
665	9.814	8.089	7.861	5.504	8.943	5.435	8.26	8.932	7.319	8.3	14.514	9.236	11.88	8.675	14.774	19.191	8.092	2.201	2.644	13.68	8.0422	11.8158	7.6492	9.1616	1.61464	2.85286	1.36509	7.29859
666	9.635	8.224	8.073	5.824	8.92	5.93	8.855	8.619	7.372	8.062	14.283	9.487	11.932	8.572	14.243	19.513	8.335	2.369	2.929	13.43	8.1352	11.7034	7.7676	9.3152	1.43341	2.6398	1.17551	7.26156
667	9.7	8.057	8.235	5.594	9.048	5.694	8.285	8.859	7.343	8.391	14.423	9.413	11.728	8.956	14.497	19.548	8.435	2.178	2.858	13.383	8.1268	11.8034	7.7144	9.2804	1.56167	2.64316	1.25633	7.32566
668	9.397	8.04	7.855	5.747	8.798	5.827	8.074	8.854	7.578	8.255	14.451	9.275	11.626	8.782	14.479	19.29	8.202	2.437	2.705	13.902	7.9674	11.7226	7.7176	9.3072	1.3858	2.72439	1.1512	7.29347
669	9.097	7.812	7.815	5.616	8.92	5.151	8.187	8.829	7.273	8.04	15.145	9.575	12.236	8.827	14.84	19.31	8.068	2.479	2.522	13.633	7.852	12.1246	7.496	9.2024	1.38684	2.91047	1.42294	7.29576
670	9.413	7.99	8.17	5.773	9.057	5.44	8.457	8.898	7.284	8.602	15.365	9.735	11.51	8.718	14.909	20.326	7.991	2.214	2.653	12.977	8.0806	12.0474	7.7362	9.2322	1.42038	2.9965	1.42267	7.60226
671	9.042	7.529	8.184	5.46	8.552	5.092	8.395	8.77	7.31	8.77	15.277	9.48	11.635	8.523	14.782	20.097	7.808	1.947	2.738	13.724	7.7534	11.9394	7.6674	9.2628	1.39586	3.04274	1.55895	7.67288
672	9.167	7.585	7.873	5.622	8.628	5.351	7.992	8.73	7.245	8.239	14.578	9.793	12.21	8.739	14.375	19.368	8.096	2.262	2.817	13.416	7.775	11.939	7.5114	9.1918	1.35521	2.6371	1.32133	7.26739
673	9.098	7.994	7.926	5.168	8.86	5.415	8.482	8.606	7.545	8.514	15.242	9.635	11.952	8.829	14.421	19.906	8.035	2.037	2.507	13.533	7.8092	12.0158	7.7124	9.2036	1.56436	2.82937	1.35457	7.59696
674	9.285	7.36	7.675	5.152	8.4	5.717	8.37	8.879	7.313	8.271	15.176	10.632	11.966	8.674	14.65	19.53	8.541	2.391	2.847	13.411	7.5744	12.2196	7.71	9.344	1.54369	2.72962	1.24965	7.27144
675	9.835	8.461	8.358	6.035	8.682	6.032	8.686	8.879	7.63	8.636	15.375	10.285	11.71	9.412	15.214	20.069	8.396	2.618	3.182	14.081	8.2742	12.3992	7.9726	9.6692	1.38368	2.76797	1.1889	7.43377
676	9.314	7.66	8.112	5.431	8.578	5.519	8.457	8.904	7.506	8.252	15.287	10.391	11.349	9.322	14.674	19.305	8.665	2.283	2.985	13.741	7.819	12.2046	7.7276	9.3958	1.4684	2.64243	1.33397	7.23356
677	9.009	7.217	7.575	5.434	8.32	5.555	8.404	8.483	7.575	8.145	15.52	10.316	12.122	9.566	14.475	20.107	8.35	2.306	2.886	13.219	7.511	12.3998	7.6324	9.3736	1.3512	2.57352	1.21455	7.46794
678	9.483	7.838	7.766	5.485	8.526	5.891	8.467	8.234	7.708	8.421	15.092	10.283	11.839	9.482	14.515	20.397	8.366	2.131	2.706	13.485	7.8196	12.2422	7.7442	9.417	1.47644	2.49533	1.0789	7.68663
679	8.889	7.417	7.889	5.569	8.341	5.241	8.548	8.639	7.889	8.567	15.756	10.17	11.682	9.511	14.993	19.934	8.205	2.432	3.091	13.517	7.621	12.4224	7.7768	9.4358	1.26988	2.8204	1.44961	7.37721
680	9.15	7.786	7.41	5.469	8.653	5.215	8.317	8.795	7.718	8.866	15.392	10.18	11.725	9.304	14.891	20.081	8.151	1.994	2.663	13.849	7.6936	12.2984	7.7822	9.3476	1.42121	2.74202	1.50674	7.6756
681	8.655	7.592	7.49	5.501	8.063	5.44	8.655	8.856	7.514	8.404	15.538	10.49	11.876	9.207	14.991	20.077	8.66	1.993	2.786	13.357	7.4602	12.4204	7.7738	9.3746	1.18824	2.7693	1.40169	7.56322
682	8.846	7.608	7.218	5.163	8.043	5.648	8.417	8.449	7.361	8.389	15.667	10.142	11.701	9.879	14.46	20.336	8.32	2.338	2.624	13.241	7.3756	12.3698	7.6528	9.3718	1.37677	2.59109	1.21082	7.60424
683	8.81	7.401	7.745	5.302	8.417	5.758	8.464	8.796	7.684	8.38	15.587	10.076	11.524	9.539	14.781	19.641	8.57	2.253	3.199	13.914	7.535	12.3014	7.8164	9.5154	1.36491	2.74459	1.21975	7.3384
684	9.103	7.36	7.452	5.103	8.456	5.492	8.331	8.651	7.513	8.382	16.087	10.17	12.135	9.753	14.794	20.068	8.765	2.251	3.37	13.546	7.4948	12.5878	7.6738	9.6	1.52077	2.79279	1.29175	7.39371
685	8.685	7.148	7.677	5.18	8.201	5.186	8.635	8.726	7.739	8.426	15.616	10.835	11.712	10.242	15.029	20.093	8.63	2.276	2.987	14.156	7.3782	12.6868	7.7424	9.6284	1.35638	2.47096	1.48043	7.56918
686	8.996	7.791	7.499	5.488	7.856	5.393	8.121	8.794	7.807	8.535	16.376	10.571	12.119	9.323	14.603	20.329	8.459	2.064	3.288	13.752	7.526	12.5984	7.73	9.5784	1.27419	2.88778	1.36019	7.58753
687	9.177	7.228	7.426	5.429	8.387	5.304	8.354	8.924	7.614	8.962	16.031	10.345	11.518	9.962	15.027	20.666	8.705	2.227	3.053	13.754	7.5294	12.5766	7.8316	9.681	1.41096	2.77823	1.51494	7.70884
688	8.781	7.26	7.467	5.054	8.174	5.969	8.244	8.705	7.467	8.49	16.201	10.946	11.141	10.362	15.136	20.034	8.28	1.972	2.861	13.658	7.3472	12.7572	7.775	9.361	1.41599	2.69944	1.11272	7.58935
689	8.687	6.958	7.371	4.918	8.403	5.279	8.339	8.415	7.723	8.516	16.382	11.163	11.613	9.907	15.019	20.335	8.506	2.108	2.852	13.333	7.2674	12.8168	7.6544	9.4268	1.49424	2.74825	1.36352	7.61393
690	9.11	7.254	7.478	5.29	8.701	5.529	8.741	8.534	7.35	8.83	16.487	11.176	11.348	10.174	14.712	20.48	8.67	2.384	2.971	13.708	7.5666	12.7794	7.7968	9.6426	1.49645	2.68743	1.40045	7.61775
691	8.533	7.041	7.666	5.395	7.806	5.169	8.454	8.661	7.768	8.52	16.242	10.982	12.066	10.323	14.885	20.047	8.417	2.192	2.926	13.712	7.2882	12.8996	7.7144	9.4588	1.18382	2.5556	1.46407	7.52942
692	8.649	7.571	7.165	5.701	8.316	5.618	8.339	8.826	7.78	8.407	16.644	11.523	11.498	10.089	14.88	20.297	8.404	1.912	3.107	13.624	7.4804	12.9268	7.794	9.4688	1.15518	2.72478	1.2721	7.63589
693	8.934	7.095	7.205	4.9	7.587	5.096	8.683	8.325	7.613	8.588	16.922	10.763	11.631	10.411	14.357	20.008	8.336	1.987	3.169	13.251	7.1442	12.8168	7.661	9.3502	1.45276	2.76753	1.49384	7.45415
694	8.31	7.006	7.725	5.198	8.106	5.379	8.673	8.856	7.869	8.501	16.654	11.512	11.461	10.574	14.66	19.847	8.686	2.069	2.878	13.844	7.269	12.9722	7.8556	9.4648	1.26	2.57738	1.43346	7.51096
695	8.693	7.639	7.152	5.371	7.795	5.53	8.282	8.639	7.809	8.505	16.087	11.387	11.788	10.715	15.068	20.332	8.828	2.378	3.348	13.729	7.33	13.009	7.753	9.723	1.2287	2.403	1.28211	7.48314
696	8.431	6.894	7.567	4.834	8.442	5.276	8.39	8.711	7.688	8.604	16.443	11.101	11.579	10.249	14.919	19.57	8.442	2.156	3.227	13.343	7.2336	12.8582	7.7338	9.3476	1.48985	2.67534	1.43053	7.25365
697	8.585	6.907	7.468	5.115	7.768	5.104	8.46	8.638	7.618	7.985	16.129	10.715	11.714	10.531	15.1	19.443	8.296	2.169	3.195	13.604	7.1686	12.8378	7.561	9.3414	1.29815	2.6	1.43073	7.25477
698	8.598	6.829	7.102	5.081	8.44	5.336	8.197	8.399	7.73	8.29	15.979	11.341	11.066	10.765	14.996	20.248	8.738	2.25	3.192	13.958	7.21	12.8294	7.5904	9.6772	1.42556	2.45972	1.28579	7.55265
699	8.818	7.572	7.45	5.32	7.91	5.883	8.679	9.219	7.715	9.052	16.854	11.975	11.772	11.339	15.346	20.443	8.92	2.419	3.271	13.87	7.414	13.4572	8.1096	9.7846	1.28728	2.4814	1.37446	7.54517
700	8.303	7.171	7.479	5.152	8.278	5.375	7.907	9.408	7.92	8.705	16.343	11.713	11.781	10.46	14.862	19.971	8.519	2.184	3.221	13.815	7.2766	13.0318	7.863	9.542	1.2867	2.46128	1.52408	7.45259
701	8.487	6.841	7.497	5.311	8.562	5.351	9.197	8.728	8.022	8.603	16.512	11.077	11.519	11.09	14.661	20.952	9.025	2.508	3.42	13.776	7.3396	12.9718	7.9802	9.9362	1.34158	2.48135	1.52824	7.6577
702	8.615	7.38	7.206	5.064	8.142	5.542	8.447	8.738	7.22	8.454	16.433	11.502	11.934	10.747	15.504	20.238	8.387	2.535	3.115	14.043	7.2814	13.224	7.6802	9.6636	1.36486	2.56227	1.33129	7.5221
703	8.477	6.634	7.354	5.584	7.972	5.705	8.579	9.339	7.426	8.865	16.884	11.71	11.669	10.816	14.909	20.363	8.449	2.381	3.124	14.333	7.2042	13.1976	7.9828	9.73	1.13822	2.58554	1.45528	7.64095
704	8.627	7.54	7.043	4.781	7.959	5.234	8.714	8.36	7.787	8.474	16.05	11.079	11.858	10.82	14.916	19.766	8.579	2.022	3.128	13.298	7.19	12.9446	7.7138	9.3586	1.4666	2.38249	1.42747	7.36693
705	8.676	6.816	6.798	4.958	7.531	5.421	8.356	8.695	7.732	8.537	16.708	11.365	11.778	10.883	14.731	20.169	8.379	1.981	3.357	13.826	6.9558	13.093	7.7482	9.5424	1.35329	2.51747	1.35131	7.55085
706	8.188	7.01	7.091	4.674	8.017	5.556	8.508	8.958	8.017	9.045	16.722	11.859	11.606	11.382	14.935	19.911	8.831	2.257	3.294	14.472	6.996	13.3008	8.0168	9.753	1.40216	2.39834	1.43526	7.48687
707	8.584	7.518	7.495	4.737	7.715	5.051	8.453	8.448	7.759	8.566	16.246	11.378	11.099	10.945	14.784	19.849	8.963	2.262	3.434	13.655	7.2098	12.8904	7.6554	9.6326	1.45213	2.45595	1.49057	7.31012
708	8.328	6.746	7.084	5.085	7.765	5.284	8.657	8.185	6.968	8.648	15.723	11.41	11.382	10.992	14.588	20.118	8.665	2.132	3.232	13.603	7.0016	12.819	7.5484	9.55	1.23365	2.17662	1.44116	7.48058
709	8.381	6.917	6.739	4.877	7.862	5.617	8.171	8.512	7.876	8.468	16.418	11.284	10.751	10.807	14.896	20.231	8.561	1.881	2.989	14.113	6.9552	12.8312	7.7288	9.555	1.34372	2.64325	1.20797	7.70946
710	8.306	6.812	7.483	4.613	7.644	5.781	8.814	8.391	7.6	8.932	15.899	11.597	11.384	11.128	14.116	20.321	8.911	2.445	3.056	13.633	6.9716	12.8248	7.9036	9.6732	1.42151	2.09645	1.2963	7.51117
711	8.438	6.366	6.934	5.134	7.701	4.91	8.393	8.277	8.233	8.557	15.894	11.609	11.171	10.945	14.518	20.006	8.53	2.09	3.276	14.37	6.9146	12.8274	7.674	9.6544	1.266	2.23795	1.5502	7.55912
712	8.189	6.834	7.156	4.891	7.805	5.494	8.755	8.892	7.669	8.726	15.928	11.96	11.845	10.725	15.021	19.957	8.801	2.297	3.417	14.946	6.975	13.0958	7.9072	9.8836	1.28047	2.24739	1.43521	7.54398
713	8.536	7.218	6.9	4.645	7.308	6.1	8.613	8.927	8.065	8.927	15.703	11.169	11.038	10.458	14.919	20.324	8.453	2.135	2.702	13.361	6.9214	12.6574	8.1264	9.395	1.41658	2.45284	1.18625	7.64139
714	7.788	6.587	6.95	4.623	7.725	5.263	9.081	8.774	7.619	8.744	15.47	11.542	10.996	10.523	14.827	19.699	8.455	2.038	3.029	14.69	6.7346	12.6716	7.8962	9.5822	1.28623	2.30092	1.5735	7.57577
715	8.306	7.12	6.895	4.886	8.387	5.44	8.399	8.782	8.158	8.813	16.221	11.195	11.283	11.239	14.566	19.658	9.259	2.286	3.217	13.775	7.1188	12.9008	7.9184	9.639	1.41891	2.34975	1.41218	7.29623
716	8.637	6.578	6.477	4.496	7.467	5.84	8.76	8.58	8.199	8.275	16.642	11.743	10.941	11.656	15.026	20.261	8.753	2.305	3.516	13.792	6.731	13.2016	7.9308	9.7254	1.52132	2.48955	1.19068	7.45152
717	7.819	6.199	6.754	4.714	7.651	5.202	8.427	8.934	7.913	8.964	15.958	11.583	11.435	10.677	14.73	19.985	8.969	2.168	3.193	14.189	6.6274	12.8766	7.888	9.7008	1.25781	2.31948	1.56186	7.50897
718	8.02	6.892	6.89	4.766	7.865	5.336	8.067	8.746	8.007	8.463	16.5	11.612	11.522	10.795	14.74	19.593	9.402	2.195	3.073	14.048	6.8866	13.0338	7.7238	9.6622	1.29796	2.46196	1.36847	7.36716
719	8.163	6.901	6.721	5.393	7.512	5.863	8.77	8.809	7.544	8.888	15.153	11.778	11.433	11.103	14.598	20.063	8.717	2.176	3.196	14.028	6.938	12.813	7.9748	9.636	1.03266	1.90798	1.30455	7.51634
720	7.645	6.604	6.601	4.81	6.779	5.498	8.116	8.15	8.134	8.844	16.172	11.537	11.035	10.289	14.219	19.326	8.63	1.903	3.196	14.235	6.4878	12.6504	7.7484	9.458	1.03262	2.46412	1.29516	7.3684
721	8.071	6.762	6.35	4.957	7.306	5.648	7.76	8.537	8.278	8.586	16.509	11.462	11.323	11.493	14.644	19.67	9.644	2.265	3.836	14.353	6.6892	13.0862	7.7618	9.9536	1.16304	2.36788	1.22626	7.25256
722	8.539	7.028	6.105	4.424	7.395	5.632	8.998	8.537	7.835	8.39	16.04	11.884	11.535	11.312	14.871	20.177	9.199	2.002	3.908	13.859	6.6982	13.1284	7.8784	9.829	1.54165	2.17375	1.32261	7.41686
723	8.247	6.424	6.676	5.023	7.762	5.838	9.117	9.075	8.281	9.302	15.923	11.484	11.072	10.993	15.103	19.519	8.605	1.819	3.037	13.855	6.8264	12.915	8.3226	9.367	1.258	2.39655	1.44321	7.43013
724	7.517	6.389	6.605	4.862	7.351	5.443	8.729	8.546	8.015	8.762	16.001	11.496	11.449	11.558	14.155	20.076	9.031	2.433	3.026	14.388	6.5448	12.9318	7.899	9.7908	1.05533	2.06541	1.40514	7.53984
725	8.697	7.242	6.602	4.595	7.379	6.184	8.896	8.673	7.864	8.495	15.368	11.593	11.358	11.108	14.385	19.428	9.183	2.628	3.254	13.528	6.903	12.7624	8.0224	9.6042	1.49812	1.96843	1.09711	7.09001
726	7.702	6.541	6.545	4.744	7.174	5.756	8.7	8.711	7.983	8.612	15.95	11.405	10.964	10.712	14.81	19.507	9.31	2.032	3.088	14.248	6.5412	12.7682	7.9524	9.637	1.11555	2.43075	1.26437	7.40794
727	7.722	6.578	7.012	4.347	7.129	5.468	8.998	8.411	8.278	8.494	15.655	11.544	11.035	11.051	14.274	19.545	9.111	1.908	3.164	14.191	6.5576	12.7118	7.9298	9.5838	1.30153	2.12347	1.40291	7.42979
728	7.881	6.639	6.567	4.533	7.55	4.901	8.808	8.867	8.083	8.5	15.957	11.565	11.517	10.979	14.6	19.292	9.239	1.914	2.974	14.15	6.634	12.9236	7.8318	9.5138	1.30507	2.21459	1.66762	7.37748
729	7.697	6.185	6.782	5.116	7.376	5.092	8.555	8.713	8.317	9.142	16.032	10.963	11.074	10.662	14.769	19.905	9.012	1.872	3.078	14.241	6.6312	12.7	7.9638	9.6216	1.02571	2.50985	1.63332	7.58838
730	7.742	6.427	6.351	4.567	7.317	5.944	8.325	8.594	7.825	8.856	15.525	11.374	10.81	11.233	14.749	19.493	9.178	2.369	3.734	13.374	6.4808	12.7382	7.9088	9.6296	1.22191	2.21665	1.16269	7.05311
731	8.417	6.896	6.83	5.007	7.683	5.771	8.798	8.783	8.636	8.767	15.237	11.216	10.619	11.357	14.152	19.368	8.844	2.168	3.299	13.807	6.9666	12.5162	8.151	9.4972	1.27285	2.04403	1.33202	7.22095
732	7.456	5.873	6.183	4.58	7.066	5.312	8.397	8.489	8.08	8.652	16.179	11.632	11.097	11.459	13.968	19.088	9.019	2.566	3.746	13.968	6.2316	12.867	7.786	9.6774	1.12407	2.16922	1.39862	6.94902
733	8.364	6.398	6.599	4.887	7.372	5.548	9.164	8.425	8.425	8.705	16.109	11.887	11.05	11.176	14.366	20.637	8.71	2.102	3.32	14.349	6.724	12.9176	8.0534	9.8236	1.2851	2.22857	1.43276	7.75514
734	7.6	6.04	6.693	4.621	7.203	5.36	8.828	8.847	8.42	8.979	14.962	11.125	11.015	10.54	14.11	18.966	8.692	1.928	3.35	13.929	6.4314	12.3504	8.0868	9.373	1.16835	2.02972	1.53865	7.15806
735	7.33	5.777	6.642	5.185	7.156	5.343	9.184	9.177	8.696	9.16	15.607	11.344	11.152	10.96	14.312	18.683	8.755	2.205	3.387	14.693	6.418	12.675	8.312	9.5446	0.916206	2.13943	1.67258	7.11382
736	8.009	6.363	6.025	4.804	7.214	5.406	8.613	8.072	7.824	8.815	15.341	10.73	10.652	10.856	14.196	19.335	8.431	1.83	3.222	13.321	6.483	12.355	7.746	9.2278	1.21514	2.24128	1.3677	7.25158
737	7.399	5.706	6.816	4.79	7.034	5.35	8.737	9.228	8.458	9.362	15.255	11.679	12.018	11.47	14.52	19.169	9.131	2.662	3.807	13.817	6.349	12.9884	8.227	9.7172	1.07631	1.76387	1.6493	6.91366
738	7.688	6.421	6.853	4.433	7.445	5.428	8.887	8.596	8.139	8.511	15.905	11.129	10.606	11.326	14.365	19.378	9.411	2.128	3.404	14.569	6.568	12.6662	7.9122	9.778	1.29273	2.33341	1.41413	7.32118
739	7.581	6.651	6.518	4.503	7.517	4.997	8.46	8.481	8.075	8.769	15.464	11.729	11.387	11.207	13.729	19.648	9.331	2.414	2.969	14.305	6.554	12.7032	7.7564	9.7334	1.24493	1.84353	1.56215	7.39411
740	7.675	6.057	6.66	4.737	7.467	6.109	9.465	8.668	7.964	9.32	15.619	11.146	11.687	10.883	14.332	19.078	8.684	2.068	3.217	14.744	6.5192	12.7334	8.3052	9.5582	1.18784	2.11666	1.36439	7.32457
741	7.593	6.528	6.688	4.47	7.012	5.463	8.693	8.599	8.053	9.145	15.834	11.324	11.226	11.438	13.615	18.845	9.147	1.898	3.355	14.486	6.4582	12.6874	7.9906	9.5462	1.18375	2.01972	1.46533	7.20858
742	7.536	6.549	6.348	4.273	7.058	5.561	8.992	8.632	7.577	9.445	15.669	11.202	11.366	11.431	13.925	19.403	8.5	2.342	3.603	14.15	6.3528	12.7186	8.0414	9.5996	1.25113	1.99673	1.54843	7.18773
743	7.73	5.789	6.205	4.865	6.857	5.771	8.727	9.254	8.338	9.184	15.198	12.018	10.821	11.377	13.732	18.71	8.967	2.107	3.388	14.472	6.2892	12.6292	8.2548	9.5288	1.08212	1.80458	1.4371	7.10348
744	7.315	6.113	6.343	4.697	6.892	5.608	9.004	8.64	7.972	8.692	15.39	11.436	10.871	11.087	14.229	19.674	9.026	2.211	3.457	14.229	6.272	12.6026	7.9832	9.7194	0.997897	2.06587	1.37999	7.34005
745	7.404	6.024	6.306	4.505	6.995	5.791	8.892	8.603	7.967	8.921	15.429	10.871	11.377	10.821	13.496	19.074	8.933	2.613	3.388	14.308	6.2468	12.3988	8.0348	9.6632	1.11646	2.01579	1.3117	7.06672
746	7.574	5.877	6.16	4.509	6.923	5.591	8.86	8.734	8.344	9.604	14.891	11.145	11.571	11.316	13.918	18.993	9.254	2.863	3.885	14.468	6.2086	12.5682	8.2266	9.8926	1.15927	1.71794	1.5424	6.88596
747	7.145	5.918	6.267	4.274	7.596	5.648	8.481	8.763	8.565	9.266	15.145	10.583	10.229	10.381	14.096	18.872	8.965	2.309	3.37	14.778	6.24	12.0868	8.1446	9.6588	1.28718	2.34585	1.42854	7.16134
748	7.899	5.535	6.37	4.403	7.182	5.427	8.956	9.239	8.192	9.744	14.269	11.196	11.178	11.421	14.056	18.763	9.292	1.834	3.322	14.94	6.2778	12.424	8.3116	9.6302	1.37122	1.59169	1.70751	7.2851
749	7.098	5.834	6.258	4.739	7.411	5.481	8.584	8.6	8.417	9.332	16.036	10.996	10.531	10.531	14.181	19.558	9.083	1.93	3.361	15.169	6.268	12.455	8.0828	9.8202	1.06321	2.51669	1.49668	7.54908
750	7.741	6.041	6.173	3.81	6.137	5.745	9.182	8.133	7.749	8.628	14.695	11.255	10.887	11.396	12.951	18.788	9.151	1.999	2.77	14.16	5.9804	12.2368	7.8874	9.3736	1.40318	1.58474	1.31281	7.23848
751	7.671	6.125	6.239	4.734	7.028	6.05	8.933	8.697	8.128	9.45	14.806	11.724	11.048	11.528	13.596	18.975	8.86	2.224	3.487	14.312	6.3594	12.5404	8.2516	9.5716	1.10439	1.5942	1.3192	7.11357
752	7.5	5.813	6.621	4.745	7.21	5.419	8.082	9.215	8.865	9.251	16.129	10.946	10.911	10.5	13.997	17.998	9.339	2.304	3.589	14.622	6.3778	12.4966	8.1664	9.5704	1.11759	2.46731	1.60618	6.80394
753	7.393	6.483	5.773	3.634	6.511	5.801	8.664	8.65	7.931	9.086	15.098	10.846	11.151	10.918	12.947	19.09	8.888	1.975	3.484	14.083	5.9588	12.192	8.0264	9.504	1.4209	1.83938	1.31146	7.17921
754	7.701	6.104	5.838	4.697	6.737	5.933	9.146	8.57	8.496	9.038	14.468	11.256	11.453	11.471	13.847	19.236	9.001	2.04	3.49	14.315	6.2154	12.499	8.2366	9.6164	1.11124	1.53216	1.31855	7.24443
755	6.75	5.7	6.105	4.816	6.978	5.494	8.644	9.158	8.76	9.31	14.53	11.03	11.305	10.755	13.766	17.635	9.271	2.418	3.243	14.259	6.0698	12.2772	8.2732	9.3652	0.865665	1.73993	1.57768	6.67257
756	7.409	6.334	5.912	4.749	6.145	5.489	9.194	8.471	8.025	9.304	15.641	11.673	10.561	11.469	13.549	18.673	9.116	2.168	3.28	14.576	6.1098	12.5786	8.0966	9.5626	0.952671	2.02744	1.54976	7.11485
757	7.528	6.18	6.354	4.616	6.547	6.45	9.299	8.922	8.15	9.463	14.692	11.504	10.98	11.317	13.326	17.664	8.679	2.132	3.479	14.195	6.245	12.3638	8.4568	9.2298	1.04965	1.58873	1.2308	6.69968
758	6.829	5.632	5.902	3.96	6.678	5.691	8.811	7.998	8.328	8.775	14.558	11.101	10.817	11.309	13.415	18.75	9.02	2.269	3.442	13.958	5.8002	12.24	7.9206	9.4878	1.14608	1.65399	1.29092	6.9759
759	7.171	5.933	5.769	4.555	6.684	5.713	9.129	8.136	8.554	9.23	14.383	11.658	10.863	11.128	13.427	18.609	9.671	2.29	3.974	14.382	6.0224	12.2918	8.1524	9.7852	0.997805	1.53781	1.43415	6.87297
760	7.106	5.19	5.776	3.924	6.4	5.469	8.643	8.915	8.372	9.439	14.526	10.978	10.028	11.13	13.624	18.704	9.288	1.576	3.134	14.792	5.6792	12.0572	8.1676	9.4988	1.21292	1.9165	1.55927	7.34982
761	6.722	5.658	6.393	4.461	6.373	5.839	8.668	8.584	8.564	9.938	15.424	10.72	11.109	10.739	14.34	19.398	8.911	2.568	3.599	14.678	5.9214	12.4664	8.3186	9.8308	0.904082	2.24355	1.50197	7.20167
762	6.78	5.737	5.781	4.178	6.247	5.176	8.225	8.803	8.458	9.594	14.544	11.773	10.928	11.292	13.164	18.419	9.065	2.305	3.803	14.199	5.7446	12.3402	8.0512	9.5582	0.972121	1.49584	1.68878	6.81955
763	7.356	5.955	5.576	4.294	6.573	6.388	8.964	9.341	8.099	9.259	14.495	10.856	11.342	11.089	13.146	18.515	9.475	2.412	3.56	14.367	5.9508	12.1856	8.4102	9.6658	1.14534	1.57621	1.23285	6.89827
764	7.675	6.181	6.384	4.325	7.146	5.792	9.701	9.246	8.958	9.432	14.558	10.915	10.895	10.679	13.303	18.266	8.638	2.199	3.455	15.115	6.3422	12.07	8.6258	9.5346	1.27664	1.75784	1.60713	7.05256
765	7.555	5.86	6.044	4.077	6.781	6.174	9.083	8.728	8.81	9.732	14.194	11.523	11.342	11.221	13.44	18.114	9.508	2.619	3.405	14.177	6.0634	12.344	8.5054	9.5646	1.29686	1.37504	1.36161	6.71848
766	6.801	6.093	5.594	3.87	6.73	5.535	9.697	8.728	8.833	9.947	15.14	10.958	10.778	10.318	13.375	18.078	9.358	1.84	2.879	14.805	5.8176	12.1138	8.548	9.392	1.19567	2.06722	1.76559	7.14493
767	6.783	5.744	6.019	4.296	6.933	5.829	9.411	9.358	8.996	9.017	13.858	11.378	11.236	11.256	13.292	17.419	9.013	2.488	3.528	15.398	5.955	12.204	8.5222	9.5692	1.05392	1.26861	1.5175	6.75543
768	7.37	5.935	5.634	4.422	6.739	6.13	9.022	9.29	8.567	9.439	13.803	10.878	11.082	11.244	13.116	17.347	9.455	2.359	3.68	14.796	6.02	12.0246	8.4896	9.5274	1.12353	1.33851	1.36007	6.60469
769	6.897	5.216	5.489	4.702	7.041	5.369	8.817	9.141	8.638	9.403	13.963	10.773	10.794	11.528	13.252	17.739	9.097	2.075	3.626	14.586	5.869	12.062	8.2736	9.4246	1.0444	1.46496	1.6502	6.77342
770	7.485	5.487	6.568	4.238	6.568	5.224	9.043	8.786	8.454	9.474	14.258	10.967	10.685	11.248	13.157	18.238	9.406	2.102	3.446	15.021	6.0692	12.063	8.1962	9.6426	1.24442	1.56358	1.7028	7.0378
771	6.117	5.275	5.243	4.123	6.453	4.965	9.397	8.739	7.999	10.06	14.663	11.196	10.856	11.132	13.153	18.755	9.302	2.512	3.555	14.385	5.4422	12.2	8.232	9.7018	0.906228	1.65299	1.98012	6.95574
772	7.424	5.297	5.68	4.45	6.06	5.613	9.937	8.497	8.497	9.168	14.301	10.813	10.636	11.143	12.97	17.909	8.5	2.29	3.347	14.982	5.7822	11.9726	8.3424	9.4056	1.09468	1.59966	1.63721	6.92031
773	6.791	5.374	6.419	4.695	6.668	5.374	8.95	8.664	8.914	9.413	15.4	11.153	11.636	10.845	13.382	18.758	9.55	2.634	4.018	14.516	5.9894	12.4832	8.263	9.8952	0.91403	1.90305	1.63748	6.84264
774	6.651	6.036	6.117	4.667	6.389	6.446	9.658	9.357	8.179	9.56	14.12	10.698	11.176	11.416	13.502	18.404	9.393	2.566	3.196	14.658	5.972	12.1824	8.64	9.6434	0.768615	1.52474	1.36226	6.95729
775	6.229	4.923	5.564	3.939	6.572	6.022	9.274	9.045	8.976	9.228	14.367	10.597	11.314	10.554	12.778	18.08	9.729	1.933	3.344	14.907	5.4454	11.922	8.509	9.5986	1.0535	1.63611	1.39577	7.03583
776	6.412	5.404	5.822	4.286	6.349	5.519	8.541	9.008	9.603	9.076	14.653	10.941	10.853	10.591	13.706	18.305	8.972	2.013	3.326	13.821	5.6546	12.1488	8.3494	9.2874	0.868869	1.88815	1.62643	6.89973
777	7.046	5.683	5.648	3.53	5.907	5.636	9.379	9.296	8.378	9.061	13.899	11.537	10.753	11.716	13.062	17.577	9.005	1.994	3.159	14.545	5.5628	12.1934	8.35	9.256	1.27204	1.26462	1.56731	6.84079
778	6.167	5.143	5.469	4.814	7.175	5.881	8.595	8.273	8.32	8.764	13.351	11.28	11.192	10.971	12.947	17.608	8.455	2.163	3.731	14.933	5.7536	11.9482	7.9666	9.378	0.939143	1.11116	1.18313	6.77104
779	7.719	6.526	5.652	4.698	6.296	6.339	9.053	8.228	8.395	9.158	14.282	11.024	11.315	11.786	12.831	18.282	10.06	2.308	3.809	14.906	6.1782	12.2476	8.2346	9.873	1.11544	1.32845	1.13375	6.89345
780	7.729	5.945	6.453	4.428	6.359	6.326	9.465	8.738	8.502	9.821	14.147	9.986	10.99	11.263	13.024	18.157	8.254	1.938	3.625	14.955	6.1828	11.882	8.5704	9.3858	1.18645	1.67392	1.36331	7.03362
781	6.782	5.14	6.012	4.752	7.394	5.735	9.448	9.018	8.97	10.061	14.286	10.829	10.783	11.083	14.085	16.811	8.936	2.54	3.348	15.636	6.016	12.2132	8.6464	9.4542	1.10122	1.80548	1.68543	6.66516
782	6.611	5.245	5.847	4.139	6.304	4.806	9.88	8.325	8.253	8.566	13.953	11.588	11.011	11.542	12.392	17.297	9.395	2.124	3.832	14.966	5.6292	12.0972	7.966	9.5228	0.979161	1.14872	1.88549	6.65602
783	7.258	6.207	5.443	4.003	6.493	6.378	8.529	8.567	8.933	9.177	14.238	11.077	11.007	11.288	13.229	17.898	9.247	1.572	3.802	14.742	5.8808	12.1678	8.3168	9.4522	1.23447	1.47676	1.11649	6.95302
784	6.749	5.754	5.764	4.458	6.034	5.899	9.128	8.892	9.089	9.433	13.675	10.77	10.889	10.699	13.448	17.709	9.368	2.282	3.899	16.084	5.7518	11.8962	8.4882	9.8684	0.828872	1.52383	1.46031	6.95605
785	7.314	5.583	5.119	4.061	6.522	6.216	9.727	8.86	8.245	9.23	14.555	11.519	10.5	10.856	13.094	17.221	9.362	2.536	4.243	14.127	5.7198	12.1048	8.4556	9.4978	1.25661	1.69263	1.3638	6.26848
786	6.73	5.354	5.051	3.876	6.577	5.829	9.232	8.702	8.252	9.102	14.511	11.124	11.028	12.69	13.578	18.072	8.837	2.36	3.684	14.754	5.5176	12.5862	8.2234	9.5414	1.17596	1.52195	1.39214	6.82496
787	7.027	5.761	5.961	4.168	6.567	5.942	9.532	8.714	9.472	9.901	14.114	11.164	10.733	10.973	13.362	16.107	9.32	2.228	3.115	14.903	5.8968	12.0692	8.7122	9.1346	1.08833	1.55395	1.60753	6.43933
788	6.89	5.331	5.486	2.972	6.223	5.381	8.977	8.763	8.052	8.611	14.088	10.494	10.691	12.19	12.827	18.123	9.093	2.703	3.539	14.91	5.3804	12.058	7.9568	9.6736	1.48348	1.5037	1.48008	6.80757
789	6.732	4.882	5.434	4.107	6.199	5.781	9.866	8.393	8.546	9.133	13.757	10.604	10.701	10.823	12.806	17.385	8.226	1.868	3.324	14.796	5.4708	11.7382	8.3438	9.1198	1.0403	1.45048	1.54525	6.84674
790	6.438	5.022	5.459	4.398	5.614	6.207	9.22	8.409	8.564	9.159	14.023	10.391	10.268	11.545	12.238	17.499	8.99	1.941	3.734	15.058	5.3862	11.693	8.3118	9.4444	0.753767	1.53897	1.22941	6.81002
791	7.018	5.687	6.093	4.045	6.534	5.557	9.288	9.1	9.048	10.474	13.875	10.045	11.412	11.76	13.3	18.508	9.871	2.461	3.605	14.597	5.8754	12.0784	8.6934	9.8084	1.13716	1.53299	1.84744	6.91166
792	6.076	4.872	5.24	4.27	5.921	5.972	9.377	8.436	9.065	9.798	14.257	10.721	10.721	10.92	13.047	18.049	9.973	2.169	4.338	15.248	5.2758	11.9332	8.5296	9.9554	0.74709	1.62834	1.51358	6.81362
793	6.371	5.472	5.039	3.892	6.185	6.318	10.177	8.878	8.958	8.664	14.026	11.42	11.137	11.06	13.01	17.589	8.946	2.449	3.944	14.743	5.3918	12.1306	8.599	9.5342	0.996029	1.32328	1.4057	6.59181
794	6.611	4.872	5.262	3.993	6.769	5.487	9.154	8.435	8.673	8.884	13.74	10.907	11.673	11.622	12.665	16.794	9.808	2.12	3.372	14.516	5.5014	12.1214	8.1266	9.322	1.1797	1.10007	1.4992	6.52526
795	6.46	4.778	5.615	4.657	5.668	5.82	9.61	8.914	8.781	10.165	13.468	10.143	10.456	10.639	13.039	17.122	7.875	1.434	3.103	15.061	5.4356	11.549	8.658	8.919	0.737266	1.57339	1.68169	6.99919
796	6.014	4.639	5.821	4.372	5.579	5.933	9.655	8.423	8.101	9.442	13.771	9.908	10.933	10.381	13.01	17.083	9.304	2.286	2.996	15.129	5.285	11.6006	8.3108	9.3596	0.734176	1.69522	1.48299	6.77258
797	6.803	5.246	6.097	4.647	6.608	5.874	9.044	9.025	9.159	9.696	14.554	10.397	10.767	12.302	12.033	16.984	10.159	2.698	4.286	14.504	5.8802	12.0106	8.5596	9.7262	0.915321	1.63589	1.52597	6.21856
798	6.852	5.954	5.482	4.07	6.035	5.574	9.951	8.998	9.025	9.551	13.546	10.848	9.731	12.311	13.068	16.71	9.12	2.18	3.988	15.282	5.6786	11.9008	8.6198	9.456	1.02542	1.58538	1.7481	6.50989
799	5.988	4.954	5.623	4.163	5.488	5.607	9.526	8.678	8.408	8.543	12.611	10.512	10.777	10.618	12.111	16.754	9.165	2.562	3.328	14.842	5.2432	11.3258	8.1524	9.3302	0.708761	0.966011	1.48829	6.46829
800	6.079	4.713	5.861	4.5	6.111	5.298	8.868	9.056	8.722	9.556	13.626	11.447	10.799	11.285	13.111	16.965	9.8	2.484	3.618	14.722	5.4528	12.0536	8.3	9.5178	0.782163	1.23726	1.70747	6.45961
801	5.716	4.458	5.677	4.279	5.928	5.43	9.917	9.004	8.697	10.095	13.27	10.263	9.856	11.132	12.752	17.151	8.987	1.846	3.693	14.541	5.2116	11.4546	8.6286	9.2436	0.778123	1.50486	1.88328	6.63681
802	6.926	4.825	5.235	3.396	5.942	5.053	9.282	7.64	9.14	9.847	13.306	10.16	9.916	11.244	12.507	16.598	9.185	2.059	3.576	14.46	5.2648	11.4266	8.1924	9.1756	1.31386	1.4679	1.93545	6.42298
803	6.979	5.549	5.198	3.725	6.468	6.093	9.897	8.663	8.519	9.327	12.908	11.083	10.807	11.305	12.792	16.998	10.116	2.792	2.902	14.958	5.5838	11.779	8.4998	9.5532	1.25833	0.99432	1.45397	6.6126
804	6.299	4.761	5.597	4.162	5.568	5.66	9.753	9.529	9.099	9.816	13.28	10.585	8.95	10.723	12.486	16.69	8.756	2.217	3.519	15.299	5.2774	11.2048	8.7714	9.2962	0.827805	1.70648	1.76188	6.60464
805	6.908	5.239	5.521	4.098	5.236	6.016	9.787	8.196	8.139	9.761	13.666	10.603	10.882	11.189	11.696	16.54	9.431	2.679	3.292	14.485	5.4004	11.6072	8.3798	9.2854	1.00458	1.22022	1.54655	6.30975
806	6.058	4.536	5.801	4.682	5.86	5.326	9.219	9.482	9.393	9.776	12.34	10.773	10.131	12.169	12.78	15.738	9.378	2.121	3.461	15.165	5.3874	11.6386	8.6392	9.1726	0.718782	1.12896	1.86308	6.35222
807	6.289	4.492	5.606	3.962	5.958	6.739	9.554	9.363	8.747	9.774	13.301	10.116	10.201	11.023	12.592	15.893	9.436	1.927	3.174	15.439	5.2614	11.4466	8.8354	9.1738	0.992519	1.43633	1.23272	6.57615
808	6.172	4.659	5.605	4.264	5.695	5.905	9.674	8.289	7.692	9.302	12.971	10.969	10.601	11.565	12.642	16.314	9.495	1.927	3.77	13.775	5.279	11.7496	8.1724	9.0562	0.789209	1.03088	1.49301	6.20292
809	6.19	6.159	4.31	3.703	6.1	6.159	10.266	8.134	7.709	9.044	13.314	9.753	11.575	12.28	11.958	16.901	9.871	2.38	3.848	13.93	5.2924	11.776	8.2624	9.386	1.19375	1.30245	1.53071	6.26721
810	6.631	5.214	5.538	3.775	6.436	6.088	9.373	9.437	8.88	11.231	13.483	9.515	10.279	10.22	12.345	17.1	8.576	1.292	2.996	15.532	5.5188	11.1684	9.0018	9.0992	1.14153	1.67078	1.85752	7.13913
811	7.061	4.545	5.778	4.548	6.023	5.394	9.758	8.697	9.711	10.111	13.766	9.949	10.806	11.292	12.231	16.421	9.491	2.744	3.917	14.413	5.591	11.6088	8.7342	9.3972	1.06823	1.4612	1.94012	6.09915
812	6.161	5.453	4.708	3.846	5.692	6.285	9.273	8.523	8.523	9.692	12.886	10.012	11.049	11.523	12.646	17.318	8.857	2.044	3.436	14.985	5.172	11.6232	8.4592	9.328	0.90844	1.18073	1.31504	6.77931
813	6.452	4.04	5.405	4.061	5.561	5.888	9.176	9.247	8.372	8.903	11.987	10.166	9.864	10.95	12.715	16.12	8.567	1.78	3.922	14.339	5.1038	11.1364	8.3172	8.9456	1.04121	1.20529	1.40083	6.2707
814	6.754	4.762	4.301	4.396	5.557	5.415	9.119	8.477	8.163	9.199	13.357	10.354	11.247	11.485	11.711	16.113	9.908	2.529	3.184	14.694	5.154	11.6308	8.0746	9.2856	1.02204	1.09373	1.54905	6.30739
815	6.52	5.008	5.009	4.082	5.628	5.89	9.26	9.215	8.534	8.844	13.049	10.95	10.436	11.283	12.74	16.107	9.437	1.633	2.722	15.275	5.2494	11.6916	8.3486	9.0348	0.899535	1.14402	1.40586	6.77783
816	6.09	5.091	5.204	3.758	5.814	5.684	10.119	9.765	8.224	9.38	13.021	10.597	10.413	11.087	12.849	15.89	9.923	2.481	3.308	15.548	5.1914	11.5934	8.6344	9.43	0.902772	1.25072	1.79663	6.42596
817	5.774	4.759	5.326	4.584	5.972	5.774	9.803	9.006	8.683	8.844	12.626	9.134	10.322	11.229	12.75	16.417	9.134	2.627	3.441	14.784	5.283	11.2122	8.422	9.2806	0.608446	1.5391	1.54162	6.31681
818	7.493	5.828	5.304	4.14	5.692	6.468	10.375	8.344	8.603	10.026	12.828	10.5	9.938	11.406	12.16	15.911	9.656	2.188	3.719	14.489	5.6914	11.3664	8.7632	9.1926	1.20637	1.17884	1.55418	6.17309
819	6.324	5.49	5.261	3.93	6.398	6.196	10.112	9.256	8.542	10.296	11.646	9.279	9.843	11.661	13.219	15.895	8.464	1.755	3.887	14.972	5.4806	11.1296	8.8804	8.9946	1.0007	1.58072	1.65698	6.36643
820	6.829	4.793	4.971	3.695	6.475	6.303	9.127	8.404	10.039	9.778	13.403	10.2	10.419	11.608	12.492	15.982	8.855	2.66	3.473	14.846	5.3526	11.6244	8.7302	9.1632	1.28899	1.35999	1.49716	6.19587
821	5.77	5.607	4.949	3.992	4.454	6	10.197	8.776	8.842	9.271	11.973	10.203	11.252	10.966	12.636	15.571	9.345	2.257	3.051	15.407	4.9544	11.406	8.6172	9.1262	0.75295	0.935269	1.56913	6.42506
822	6.04	4.158	5.328	3.963	6.394	5.413	9.208	9.257	9.79	10.09	12.54	10.538	10.698	12.076	12.987	16.322	9.257	3.075	3.555	15.751	5.1766	11.7678	8.7516	9.592	1.09096	1.09939	1.9026	6.36897
823	6.071	4.403	4.909	3.502	6.557	5.237	10.207	9.269	8.617	9.887	12.978	9.852	10.27	10.625	12.461	15.855	9.594	2.286	3.22	14.658	5.0884	11.2372	8.6434	9.1226	1.23904	1.39258	1.99919	6.28028
824	6.29	5.718	4.935	4.041	5.863	6.761	10.024	9.109	9.043	10.6	11.634	9.895	9.99	11.299	11.693	15.392	8.395	1.915	3.096	15.137	5.3694	10.9022	9.1074	8.787	0.889665	0.889509	1.46439	6.39754
825	6.17	5.024	5.062	4.157	6.001	5.934	9.777	9.353	8.448	9.822	12.545	10.242	10.406	11.289	11.599	15.418	8.933	2.781	3.698	14.817	5.2828	11.2162	8.6668	9.1294	0.819465	0.938487	1.62434	5.95265
826	6.497	5.136	5.335	3.976	5.98	6.259	10.34	8.359	10.024	9.922	12.903	10.013	10.174	11.462	11.553	15.405	9.466	3.026	3.992	14.951	5.3848	11.221	8.9808	9.368	0.953985	1.17823	1.70414	5.84695
827	6.25	4.918	4.466	3.332	5.737	5.84	9.529	9.447	9.275	9.516	12.694	11.13	11.428	11.693	13.569	16.255	9.142	2.021	3.677	15.046	4.9406	12.1028	8.7214	9.2282	1.13602	1.00857	1.61393	6.44185
828	6.159	4.394	5.232	4.234	6.024	6.367	10.83	10.361	9.329	10.258	13.34	9.594	10.127	11.426	13.012	15.714	9.727	2.898	4.364	15.525	5.2086	11.4998	9.429	9.6456	0.891923	1.67296	1.79614	6.01716
829	5.712	4.807	5.323	4.195	5.393	5.921	10.171	9.165	9.764	9.764	13.657	10.387	10.192	11.462	12.725	15.003	9.118	2.996	4.135	14.981	5.086	11.6846	8.957	9.2466	0.594562	1.49449	1.73471	5.72788
830	6.651	5.992	4.967	4.029	5.766	6.443	9.872	8.301	8.753	9.621	13.281	10.253	9.754	11.518	12.4	15.943	9.021	1.731	3.562	15.943	5.481	11.4412	8.598	9.24	1.01041	1.4636	1.36252	6.68081
831	6.314	4.541	4.942	3.19	6.169	6.208	10.536	9.569	9.078	9.954	12.992	8.587	10.345	11.562	11.497	14.909	8.722	1.555	2.705	15.563	5.0312	10.9966	9.069	8.6908	1.28242	1.64183	1.68602	6.56969
832	6.325	5.446	5.633	4.987	5.49	6.395	10.19	9.544	9.652	10.764	13.03	9.539	10.461	11.711	13.061	14.501	9.441	2.632	3.882	16.111	5.5762	11.5604	9.309	9.3134	0.483598	1.55956	1.69981	6.06787
833	6.562	5.35	5.289	4.245	4.976	5.706	10.414	9.429	9.081	9.777	11.692	10.075	9.973	12.219	12.422	15.646	9.462	1.634	3.608	15.344	5.2844	11.2762	8.8814	9.1388	0.838458	1.17429	1.84213	6.47812
834	5.614	4.03	5.284	4.565	6.65	5.578	10.291	9.526	9.526	10.532	11.775	9.348	10.348	10.831	12.509	16.143	8.589	2.139	3.967	16.355	5.2286	10.9622	9.0906	9.4386	1.0061	1.23018	2.0147	6.64699
835	7.085	4.84	6.006	4.016	6.183	5.823	9.646	9.417	9.311	9.737	12.9	9.03	10.602	11.07	11.549	14.929	8.796	1.906	3.712	16.169	5.626	11.0302	8.7868	9.1024	1.20346	1.40988	1.66562	6.4192
836	6.743	4.627	5.779	5.215	5.849	6.707	9.9	10.007	9.584	10.747	12.77	10.542	11.119	11.424	12.051	14.789	9.22	1.864	3.695	15.504	5.6426	11.5812	9.389	9.0144	0.788412	0.859103	1.55871	6.22349
837	6.567	4.118	4.757	4.108	5.802	6.567	10.259	9.189	9.586	9.91	13.136	9.003	11.142	11.28	12.036	15.003	8.796	1.552	2.794	15.351	5.0704	11.3194	9.1022	8.6992	1.08473	1.51759	1.47136	6.5182
838	6.941	4.83	5.345	4.602	5.558	6.619	9.517	9.451	8.637	10.832	13.175	10.435	10.504	11.617	12.566	15.893	9.461	2.261	3.478	14.336	5.4552	11.6594	9.0112	9.0858	0.915033	1.22013	1.55139	6.16581
839	6.744	4.46	5.22	3.564	5.472	5.874	10.841	9.323	9.179	10.115	11.936	9.962	10.272	12.099	12.563	16.135	10.1	2.034	3.482	15.803	5.092	11.3664	9.0664	9.5108	1.18576	1.16866	1.90517	6.63453
840	5.524	5.488	5.689	4.293	5.546	5.201	10.402	8.909	8.73	9.875	11.835	10.406	10.545	12.522	10.841	16.238	9.643	2.463	3.989	14.383	5.308	11.2298	8.6234	9.3432	0.572513	0.913073	2.0332	6.10394
841	6.065	5.235	5.37	3.774	4.717	6.426	9.856	8.672	8.128	10.631	11.716	9.766	10.22	10.743	11.901	15.217	8.546	2.302	3.418	14.768	5.0322	10.8692	8.7426	8.8502	0.852105	0.926839	1.62443	6.08352
842	5.64	4.512	5.53	3.817	5.53	6.368	9.971	9.918	8.883	11.309	11.8	9.081	10.374	11.317	11.951	15.992	9.57	2.235	3.388	15.305	5.0058	10.9046	9.2898	9.298	0.807599	1.19099	1.8465	6.43781
843	4.805	4.296	5.164	3.873	5.533	5.752	9.683	8.927	9.554	10.513	12.291	9.012	10.056	10.578	10.882	14.868	7.516	0.939	2.575	15.308	4.7342	10.5638	8.8858	8.2412	0.663609	1.19902	1.84067	6.70463
844	5.988	3.724	5.11	5.184	5.919	5.038	10.734	8.346	9.375	10.257	11.972	10.282	10.739	11.479	11.471	14.754	9.331	2.394	3.627	14.632	5.185	11.1886	8.75	8.9476	0.911553	0.671167	2.26606	5.86157
845	6.576	4.168	4.168	2.659	5.39	5.534	10.816	9.342	8.875	10.241	12.569	10.171	10.751	11.98	12.109	15.451	9.078	2.253	3.652	15.415	4.5922	11.516	8.9616	9.1698	1.47217	1.00871	2.06012	6.26005
846	5.738	4.277	5.585	4.261	4.905	7.448	11.547	9.524	8.736	10.419	12.006	9.573	10.787	12.314	12.066	15.136	9.365	3.156	4.128	16.47	4.9532	11.3492	9.5348	9.651	0.698891	1.15618	1.56714	6.11053
847	6.068	4.179	4.655	3.825	4.98	5.741	9.956	8.336	8.336	9.527	11.791	9.514	10.203	11.72	12.486	14.903	8.997	2.447	3.826	13.858	4.7414	11.1428	8.3792	8.8062	0.863184	1.23427	1.6407	5.65619
848	6.691	5.309	5.149	3.843	5.693	6.764	10.873	9.246	9.391	10.986	13.164	9.928	9.583	12.099	11.168	15.598	9.066	2.034	3.102	15.301	5.337	11.1884	9.452	9.0202	1.02813	1.49152	1.70616	6.45271
849	6.128	3.857	4.536	3.636	5.616	5.119	10.49	8.279	9.359	10.079	11.643	9.299	10.375	11.728	11.267	14.79	9.195	2.533	4.094	14.399	4.7546	10.8624	8.6652	9.0022	1.08777	1.02519	2.1526	5.67015
850	6.515	5.589	4.653	3.599	6.107	5.91	10.075	9.051	8.433	10.069	11.076	9.8	11.306	12.776	12.286	15.216	9.73	1.75	4.025	15.122	5.2926	11.4488	8.7076	9.1686	1.17502	1.15545	1.71341	6.20124
851	6.02	4.254	4.732	3.568	6.116	5.732	9.841	10.375	8.773	10.812	11.897	9.846	11.561	13.413	11.649	15.539	9.811	3.259	3.705	15.18	4.938	11.6732	9.1066	9.4988	1.11194	1.26776	2.03444	5.94476
852	5.874	4.931	4.857	4.5	3.821	6.055	11.022	7.75	8.143	10.75	12.139	9.133	10.86	11.319	11.143	14.512	9.485	2.292	4.09	15.143	4.7966	10.9188	8.744	9.1044	0.745364	1.10588	2.1091	5.86099
853	6.902	6.039	5.512	5.018	5.795	6.902	11.431	8.693	10	11.272	11.323	9.912	9.64	12.525	12.615	14.033	9.878	2.987	4.311	15.618	5.8532	11.203	9.6596	9.3654	0.698546	1.40227	1.89686	5.64303
854	5.533	5.063	4.463	4.995	5.88	6.365	9.837	9.6	8.466	11.796	12.431	9.795	11.195	11.672	11.477	15.347	10.444	2.457	3.413	15.799	5.1868	11.314	9.2128	9.492	0.542305	0.964876	1.9925	6.35238
855	6.394	4.583	5.614	4.035	5.158	6.004	10.018	8.491	10.07	10.772	12.733	9.061	9.094	11.292	11.368	14.665	9.161	1.599	3.364	14.737	5.1568	10.7096	9.071	8.7052	0.912055	1.59647	1.90598	6.14687
856	6.895	4.48	5.021	4.526	6.188	5.985	10.886	8.663	9.547	10.325	12.338	9.503	10.504	12.237	12.058	14.86	10.17	2.201	3.701	14.675	5.422	11.328	9.0812	9.1214	1.07325	1.26381	1.92241	5.96125
857	6.667	5.22	4.925	4.14	5.532	7.231	10.688	9.814	9.886	11.884	11.435	10.278	10.923	12.687	12.491	15.507	9.668	3.087	3.765	16.845	5.2968	11.5628	9.9006	9.7744	0.923998	1.02491	1.70941	6.3973
858	6.234	3.527	5.323	4.23	5.287	5.664	10.082	9.87	9.588	10.293	12.513	9.076	11.446	11.615	10.962	14.934	8.635	2.337	4.436	15.545	4.9202	11.1224	9.0994	9.1774	1.05359	1.27423	1.93809	5.98437
859	6.51	5.021	5.428	4.454	6.402	5.54	10.976	9.951	9.603	10.926	12.029	9.416	10.684	12.521	12.248	15.202	10.05	2.838	3.806	15.379	5.563	11.3796	9.3992	9.455	0.886369	1.30559	2.23924	6.00358
860	6.488	5.232	4.453	3.797	6.075	6.976	10.952	9.113	9.32	11.391	10.862	9.765	9.93	11.85	11.495	13.51	8.838	2.185	3.376	15.982	5.209	10.7804	9.5504	8.7782	1.11261	0.924063	1.74816	6.06099
861	5.725	5.101	5.269	3.467	5.744	6.28	10.479	8.804	9.551	11.149	12.229	8.91	9.726	10.868	11.489	15.515	9.595	1.991	3.198	14.684	5.0612	10.6444	9.2526	8.9966	0.93449	1.33472	1.88594	6.28284
862	5.68	4.361	5.529	4.457	6.496	5.544	10.007	8.569	8.604	11.437	11.864	9.475	11.237	12.101	12.509	15.254	9.209	1.928	3.391	16.517	5.3046	11.4372	8.8322	9.2598	0.897151	1.18973	2.18511	6.64827
863	5.888	4.969	5.008	4.196	5.618	6.399	10.96	9.577	9.442	10.017	11.986	10.286	10.582	12.126	11.98	15.424	10.417	2.629	3.878	14.992	5.1358	11.392	9.279	9.468	0.65683	0.882705	1.71611	6.01891
864	6.842	4.685	5.488	4.377	4.983	6.269	11.257	9.764	9.461	10.37	11.502	9.425	9.782	10.725	11.448	14.565	9.327	2.535	3.997	15.96	5.275	10.5764	9.4242	9.2768	0.967035	0.948063	1.89247	6.04071
865	6.494	4.829	5.411	3.957	6.155	6.427	9.79	10.044	9.841	11.261	12.153	9.008	10.493	12.168	12.648	15.538	9.45	2.339	4.046	15.556	5.3692	11.294	9.4726	9.3858	1.02109	1.51678	1.80534	6.20677
866	5.755	5.146	4.762	4.629	5.794	6.432	10.156	9.424	9.724	11.588	10.689	9.386	9.959	11.327	13.487	14.555	9.45	2.991	4.104	16.017	5.2172	10.9696	9.4648	9.4234	0.543181	1.58689	1.88762	5.90511
867	5.434	4.109	5.146	3.651	5.007	6.362	10.769	8.38	9.597	9.91	11.528	8.798	10.377	11.666	11.405	14.054	9.668	1.998	3.642	17.142	4.6694	10.7548	9.0036	9.3008	0.754474	1.20651	1.70714	6.51086
868	5.896	4.571	5.618	3.536	6.048	5.631	10.401	9.451	10.079	10.905	11.149	10.503	10.825	13.434	12.062	14.688	9.729	2.899	4.091	15.664	5.1338	11.5946	9.2934	9.4142	1.06312	1.18156	2.11419	5.86848
869	6.741	5.261	4.581	4.285	6.163	6.675	10.72	9.624	9.13	11.305	11.982	9.888	11.164	12.121	11.404	15.144	10.399	2.807	3.413	15.59	5.4062	11.3118	9.4908	9.4706	1.03846	0.889034	1.79436	6.15619
870	5.927	5.295	5.47	4.618	4.848	7.259	10.956	8.877	9.564	10.94	10.744	9.758	10.564	11.834	11.038	14.177	9.015	2.912	3.594	15.067	5.2316	10.7876	9.5192	8.953	0.516742	0.753264	1.54968	5.69841
871	6.938	4.703	6.069	4.804	6.102	6.938	10.64	9.348	10.094	12.171	11.669	9.969	10.313	13.009	11.522	16.078	10.219	3.48	4.201	15.222	5.7232	11.2964	9.8382	9.84	0.951912	1.20952	1.92365	5.92178
872	6.839	5.039	5.202	4.735	6.536	7.428	11.42	9.47	9.036	11.571	11.783	8.993	11.051	11.653	11.637	15.418	9.5	2.787	3.04	16.439	5.6702	11.0234	9.785	9.4368	0.949727	1.16974	1.73772	6.51821
873	5.648	4.771	5.35	4.66	5.776	5.29	11.814	9.091	9.025	11.191	11.477	9.195	10.552	11.941	10.535	14.585	8.979	2.006	3.487	15.523	5.241	10.74	9.2822	8.916	0.505523	1.05475	2.55411	6.18498
874	6.778	4.551	5.131	4.248	5.294	6.68	11.395	9.281	8.497	10.817	11.562	9.708	10.968	12.32	12.124	15.844	10.261	3.011	3.41	14.869	5.2004	11.3364	9.334	9.479	0.978671	1.05191	1.88375	6.10009
875	6.417	5.192	5.095	3.685	6.312	7.191	11.351	9.805	10.509	11.214	11.218	10.539	11.444	12.847	11.759	14.679	10.352	3.461	4.241	16.181	5.3402	11.5614	10.014	9.7828	1.10969	0.84688	1.69452	5.82903
876	6.473	3.865	5.523	4.91	5.652	6.377	11.594	10.239	9.787	11.305	12.018	8.645	10.268	11.767	12.048	15.155	8.739	2.278	3.558	17.022	5.2846	10.9492	9.8604	9.3504	0.969497	1.48255	2.08417	6.6425
877	6.948	5.027	5.65	4.437	6.288	5.764	11.047	9.767	8.873	11.459	11.263	8.899	10.317	12.7	11.906	15.482	9.683	3.017	3.198	15.097	5.67	11.017	9.382	9.2954	0.993648	1.47133	2.26845	6.09671
878	6.585	4.766	5.542	4.408	5.668	6.805	10.442	9.761	9.288	9.95	11.245	8.625	10.454	12.252	11.335	13.966	8.778	2.347	3.536	15.523	5.3938	10.7822	9.2492	8.83	0.848829	1.36394	1.42754	5.94208
879	6.117	4.396	4.624	3.555	5.694	6.917	11.989	8.776	9.437	11.198	11.141	8.516	10.356	12.552	11.01	13.422	9.703	1.988	3.769	16.483	4.8772	10.715	9.6634	9.073	1.03055	1.46693	2.00903	6.17553
880	5.969	4.591	5.056	4.632	5.722	5.693	11.387	10.173	9.658	11.656	11.964	9.39	11.374	12.589	11.989	14.108	10.041	2.518	3.791	16.228	5.194	11.4612	9.7134	9.3372	0.628074	1.23499	2.39544	6.08278
881	5.898	4.772	6.114	4.789	6.717	6.076	11.618	11.295	10.482	13.012	11.603	9.212	11.146	11.942	13.042	14.376	9.866	2.957	3.327	17.349	5.658	11.389	10.4966	9.575	0.855449	1.40378	2.63458	6.4499
882	5.861	4.552	5.073	4.985	5.219	6.873	11.038	10.437	10.641	10.962	11.14	8.681	10.485	12.655	11.895	14.167	9.611	2.847	3.692	16.064	5.138	10.9712	9.9902	9.2762	0.474426	1.51645	1.75943	5.97127
883	6.846	4.535	5.004	4.204	5.29	7.192	11.583	9.379	10.237	11.353	12.441	9.811	10.743	12.606	11.839	15.385	10.359	2.686	3.7	15.127	5.1758	11.488	9.9488	9.4514	1.02313	1.18835	1.77835	6.0641
884	7.137	5.771	5.034	4.866	5.285	6.997	12.016	10.403	10.067	11.242	11.683	9.77	10.439	12.982	11.242	15.587	9.823	2.784	3.667	16.695	5.6186	11.2232	10.145	9.7112	0.914907	1.228	1.91616	6.47745
885	5.542	4.136	5.641	4.655	6.544	6.534	11.359	10.706	10.323	11.665	12	9.275	11.014	12.806	11.637	15.079	9.96	2.582	3.979	16.32	5.3036	11.3464	10.1174	9.584	0.93451	1.32696	2.0716	6.24808
886	6.746	4.587	5.516	5.089	5.782	6.503	11.684	10.045	10.845	11.431	11.08	10.062	11.194	13.484	12.15	15.116	10.628	3.139	4.014	17.346	5.544	11.594	10.1016	10.0486	0.810109	1.28962	2.10814	6.39189
887	6.525	4.965	5.164	4.692	6.003	7.33	11.541	10.931	10.066	11.848	12.519	9.611	10.765	13.25	12.425	15.037	10.489	2.886	4.592	17.379	5.4698	11.714	10.3432	10.0766	0.766658	1.48627	1.81665	6.32231
888	6.441	4.927	4.51	4.943	5.452	6.98	12.497	10.573	10.064	11.618	11.27	9.822	11.455	12.357	11.439	13.912	10.115	2.998	3.973	17.146	5.2546	11.2686	10.3464	9.6288	0.742522	0.913927	2.10391	6.14504
889	6.449	5.229	5.096	4.547	5.996	7.246	11.404	9.943	9.568	11.566	12.154	9.128	10.685	12.53	11.691	15.304	9.463	2.468	3.666	15.888	5.4634	11.2376	9.9454	9.3578	0.755775	1.3667	1.74521	6.28247
890	6.821	4.97	5.52	4.464	6.407	7.6	11.669	9.719	10.415	11.951	11.959	9.604	10.947	13.654	11.855	15.914	9.651	3.171	4.143	16.919	5.6364	11.6038	10.2708	9.9596	0.978425	1.48519	1.74903	6.4012
891	6.536	4.412	4.662	4.921	5.745	6.796	11.916	10.478	10.596	11.467	11.344	10.444	10.715	12.79	11.679	14.077	10.49	2.391	3.925	16.011	5.2552	11.3944	10.2506	9.3788	0.873916	0.921423	2.02228	6.03877
892	6.152	5	5.345	4.485	6.206	6.659	11.106	10.419	9.989	11.71	11.096	8.895	11.602	12.689	12.367	14.528	10.138	2.839	3.239	16.308	5.4376	11.3298	9.9766	9.4104	0.743021	1.49835	1.96739	6.2363
893	6.403	4.891	5.678	4.702	6.01	6.47	12.05	9.825	10.113	11.155	11.353	9.619	11.662	12.066	11.799	15.045	10.321	2.894	4.107	16.833	5.5368	11.2998	9.9226	9.84	0.725966	0.974086	2.12196	6.27175
894	7.085	5.266	5.176	5.219	5.672	7.043	12.288	10.05	9.64	11.883	12.193	9.466	10.806	12.042	12.336	14.362	9.298	2.932	4.44	16.519	5.6836	11.3686	10.1808	9.5102	0.808078	1.22529	2.09124	5.95164
895	7.291	5.264	5.611	4.821	6.567	7.562	12.513	10.599	10.599	12.781	11.634	9.145	10.78	12.889	13.113	14.532	9.834	2.68	3.587	16.874	5.9108	11.5122	10.8108	9.5014	1.00392	1.62886	2.08708	6.34989
896	6.777	5.108	4.951	4.437	5.922	7.46	11.522	10.675	9.943	11.903	10.847	9.827	11.615	12.577	12.537	14.852	9.808	2.692	3.769	16.36	5.439	11.4806	10.3006	9.4962	0.918592	1.16961	1.76044	6.22478
897	6.903	4.53	5.203	4.572	5.755	7.058	12.25	9.834	11.372	11.924	11.64	9.453	11.37	12.765	11.549	14.564	10.365	2.698	3.87	16.791	5.3926	11.3554	10.4876	9.6576	0.983114	1.19633	2.1296	6.27278
898	6.93	4.793	5.448	4.715	6.068	7.141	12.608	10.558	10.107	12.023	11.849	9.613	11.364	13.189	11.948	14.252	9.686	3.174	3.612	16.457	5.5908	11.5926	10.4874	9.4362	0.928046	1.29534	2.13325	6.03495
899	6.072	4.68	5.433	4.412	6.235	7.517	12.179	10.848	10.137	12.015	11.503	9.417	11.617	12.658	11.741	14.629	9.468	2.968	3.872	17.648	5.3664	11.3872	10.5392	9.717	0.812219	1.19248	1.88797	6.45762
900	6.67	4.928	5.871	4.721	5.853	7.673	12.284	10.61	10.592	12.202	11.33	9.367	10.734	12.101	12.255	14.982	10.211	2.447	3.899	16.622	5.6086	11.1574	10.6722	9.6322	0.79155	1.17364	1.86706	6.37003
901	6.891	5.246	5.584	4.633	6.246	7.22	12.206	10.879	10.336	12.271	11.807	9.467	10.952	12.057	11.83	14.115	10.622	2.754	4.305	16.752	5.72	11.2226	10.5824	9.7096	0.87645	1.06795	2.05802	6.07095
902	6.993	5.087	5.973	4.553	6.054	7.241	12.278	10.477	10.477	12.631	11.411	9.803	10.889	13.36	12.272	14.752	10.008	3.43	4.123	16.531	5.732	11.547	10.6208	9.7688	0.943127	1.35144	2.1361	5.97228
903	6.937	4.765	5.489	4.25	6.214	8.12	12.431	10.238	10.061	12.106	11.531	9.366	11.128	13.014	11.8	14.264	10.479	3.06	4.189	16.388	5.531	11.3678	10.5912	9.676	1.08083	1.32175	1.74586	5.92925
904	6.851	4.567	5.608	4.71	5.671	7.159	12.205	10.759	10.287	12.76	11.888	9.514	11.552	13.108	12.287	15.157	10.375	3.337	4.183	16.462	5.4814	11.6698	10.634	9.9028	0.916374	1.33775	2.19087	6.05555
905	6.574	5.025	5.622	4.655	6.408	7.176	12.667	10.352	10.685	11.939	11.273	9.586	10.904	12.96	11.984	14.473	10.368	2.939	3.519	17.002	5.6568	11.3414	10.5638	9.6602	0.838085	1.25601	2.11254	6.33354
906	7.001	5.442	5.722	5.068	5.945	7.442	12.899	11.489	11.162	12.396	11.72	9.286	11.132	13.119	12.5	14.825	10.038	2.925	4.132	16.632	5.8356	11.5514	11.0776	9.7104	0.72924	1.47424	2.14765	6.15092
907	7.977	6.171	6.037	4.894	6.269	7.775	12.688	10.931	10.41	12.466	11.783	9.424	11.259	13.037	11.771	15.281	10.671	2.773	4.047	17.012	6.2696	11.4548	10.854	9.9568	1.10355	1.31087	1.97771	6.42584
908	7.525	5.238	5.538	5.02	6.38	7.737	12.777	10.516	10.544	12.437	11.357	9.486	10.982	13.079	12.058	14.693	9.739	2.886	4.115	17.064	5.9402	11.3924	10.8022	9.6994	1.0255	1.33151	2.00726	6.26065
909	7.122	4.922	5.874	5.076	5.819	7.466	13.131	10.662	11.047	11.79	11.673	9.75	11.395	13.513	11.982	14.594	10.724	3.303	4.263	17.045	5.7626	11.6626	10.8192	9.9858	0.872007	1.34683	2.09806	6.10375
910	7.34	4.848	6.015	5.078	6.382	7.449	12.788	10.984	10.686	12.179	12.315	9.246	11.242	13.224	12.125	14.963	10.29	3.234	3.978	17.379	5.9326	11.6304	10.8172	9.9688	1.01196	1.50741	2.06932	6.3483
911	7.226	4.952	5.973	5.004	6.134	7.523	12.717	11.165	10.721	11.999	11.42	9.737	11.914	13.743	12.053	14.696	10.574	3.014	3.838	17.137	5.8578	11.7734	10.825	9.8518	0.93688	1.43606	1.99922	6.32422
912	7.496	5.015	5.818	5.501	6.398	7.868	13.215	11.082	10.633	12.559	12.037	8.931	11.406	12.771	11.887	14.349	10.334	2.934	4.159	17.19	6.0456	11.4064	11.0714	9.7932	0.953726	1.46785	2.07738	6.21597
913	6.909	4.597	6.229	5.267	6.281	7.831	12.727	11.246	10.785	12.536	11.85	9.147	11.638	13.11	12.194	14.325	10.418	2.818	4.127	17.198	5.8566	11.5878	11.025	9.7772	0.916592	1.47592	1.96774	6.25533
914	7.234	5.556	5.702	5.132	6.531	7.81	13.235	10.963	11.105	12.505	12.078	9.539	11.212	12.872	11.792	15.154	10.382	3.283	4.014	16.846	6.031	11.4986	11.1236	9.9358	0.842508	1.24802	2.08401	6.21504
915	6.901	5.172	5.505	5.106	5.904	7.455	12.718	10.508	10.572	12.27	11.32	9.507	11.133	13.116	11.46	14.169	10.406	3.128	4.089	16.707	5.7176	11.3072	10.7046	9.6998	0.733504	1.28124	2.06884	6.00506
916	7.013	5.054	5.988	5.146	6.563	7.574	12.678	10.534	11.006	12.411	11.604	9.082	11.078	12.819	11.721	14.579	10.376	2.842	3.918	16.407	5.9528	11.2608	10.8406	9.6244	0.859706	1.37278	2.03925	6.1172
917	7.227	5.226	5.84	4.865	5.776	7.507	12.937	11.167	10.371	12.348	11.971	9.322	11.561	12.809	11.86	14.949	10.631	3.022	4.062	16.532	5.7868	11.5046	10.866	9.8392	0.900185	1.30501	2.12743	6.15185
918	7.142	5.411	5.876	5.241	5.837	7.659	13.057	11.039	10.961	12.155	11.981	9.631	11.27	12.801	12.012	14.619	9.959	3.085	4.178	17.33	5.9014	11.539	10.9742	9.8342	0.745067	1.1963	2.04495	6.25782
919	6.983	4.898	5.869	5.084	6.242	7.776	12.95	11.126	10.926	12.324	11.629	9.334	11.478	12.26	12.284	14.502	10.873	3.38	4.238	17.035	5.8152	11.397	11.0204	10.0056	0.85509	1.20912	1.99806	6.07343
920	7.077	5.042	6.072	5.685	7.019	7.955	12.931	11.182	10.702	13.317	12.194	9.115	11.163	12.465	12.397	14.386	10.442	2.958	3.869	17.321	6.179	11.4668	11.2174	9.7952	0.87468	1.41543	2.13629	6.32453
921	7.619	5.012	5.806	4.9	6.099	7.901	13.41	10.866	10.266	12.836	12.35	9.32	11.324	12.358	12.13	14.626	10.073	2.834	4.047	17.084	5.8872	11.4964	11.0558	9.7328	1.09443	1.2883	2.19795	6.28532
922	7.515	5.354	5.887	5.062	6.162	7.571	13.379	11.417	11.21	12.311	11.441	9.184	11.533	13.457	11.664	14.158	10.949	3.265	3.942	17.07	5.996	11.4558	11.1776	9.8768	0.952801	1.51784	2.1907	6.12695
923	7.188	5.009	6.46	5.575	6.336	7.513	13.199	11.302	10.569	12.879	11.606	9.594	10.987	12.958	12.173	14.901	10.514	3.286	3.969	17.831	6.1136	11.4636	11.0924	10.1002	0.841728	1.27272	2.27814	6.4616
924	7.272	5.283	6.57	5.501	6.181	7.968	13.066	11.113	10.779	12.224	11.339	9.369	11.2	12.644	12.266	14.629	10.305	3.528	4.157	17.183	6.1614	11.3636	11.03	9.9604	0.80754	1.27078	1.93757	6.10606
925	6.91	5.074	6.301	5.335	6.46	7.979	13.226	11.262	11.031	12.689	11.445	9.61	11.133	13.223	12.012	14.495	10.33	3.323	4.348	17.13	6.016	11.4846	11.2374	9.9252	0.779218	1.31715	2.04463	6.07557
926	7.387	5.333	5.762	5.148	6.479	7.963	12.927	10.749	10.72	12.591	11.489	9.48	11.387	13.04	12.27	14.456	10.624	2.896	4.055	17.315	6.0218	11.5332	10.99	9.8692	0.919004	1.32781	1.9754	6.31425
927	6.393	5.151	5.837	4.894	6.481	7.681	13.134	10.867	10.223	12.304	11.23	9.43	11.403	13.086	11.376	14.265	11.316	3.351	4.613	17.018	5.7512	11.305	10.8418	10.1126	0.715351	1.29498	2.10751	5.96532
928	7.027	5.145	6.118	5.21	6.556	7.89	13.239	10.374	11.219	12.784	11.715	9.02	11.264	13.044	11.97	14.275	10.546	2.857	3.635	17.087	6.0112	11.4026	11.1012	9.68	0.826482	1.48406	2.13638	6.32106
929	6.79	4.813	5.978	5.175	6.42	7.908	13.288	11.792	10.203	12.43	11.401	9.442	11.324	13.517	11.677	14.106	10.577	3.329	3.826	17.72	5.8352	11.4722	11.1242	9.9116	0.829877	1.44671	2.12283	6.31213
930	7.193	5.542	5.664	5.073	5.27	8.37	13.242	10.409	9.834	12.445	11.892	9.221	11.728	12.919	11.722	14.245	10.475	2.92	4.349	17.156	5.7484	11.4964	10.86	9.829	0.839885	1.36586	1.97752	6.15158
931	6.726	4.727	6.335	5.169	5.778	8.273	12.895	11.051	10.529	12.583	11.986	9.281	11.99	12.492	12.165	13.956	10.134	2.776	3.863	16.916	5.747	11.5828	11.0662	9.529	0.818479	1.3031	1.8531	6.16925
932	7.023	5.156	5.699	4.948	5.846	7.762	12.992	11.087	10.189	12.681	11.217	9.039	10.989	12.905	11.472	14.65	10.745	3.048	4.284	16.786	5.7344	11.1244	10.9422	9.9026	0.810427	1.38448	2.11702	6.10702
933	6.38	5.196	5.293	4.855	5.979	7.908	13.257	10.72	10.053	12.053	11.623	9.44	11.287	13.657	11.596	13.899	11.231	2.985	4.179	17.041	5.5406	11.5206	10.7982	9.867	0.62187	1.49698	2.03316	6.1094
934	6.978	4.311	5.943	5.209	5.554	6.637	13.594	11.152	10.957	12.016	11.987	9.65	11.296	13.56	11.498	13.649	11.07	2.984	3.765	16.317	5.599	11.5982	10.8712	9.557	0.978908	1.40505	2.58548	5.94733
935	7.072	5.334	5.489	4.746	6.16	7.848	13.087	11.17	11.122	13.039	10.931	9.314	11.336	13.426	11.865	14.244	10.109	2.817	3.453	18.265	5.7602	11.3744	11.2532	9.7776	0.889446	1.49106	2.1314	6.71835
936	7.842	5.331	5.986	5.706	5.986	7.927	13.568	11.245	10.769	11.692	10.397	8.93	11.497	13.102	10.713	13.53	10.348	2.594	4.332	16.923	6.1702	10.9278	11.0402	9.5454	0.972434	1.53054	2.03851	6.05086
937	6.194	4.534	6.349	5.993	6.252	7.088	12.899	11.662	10.042	13.379	11.639	8.776	10.433	13.225	11.597	13.894	10.433	3.253	4.05	17.817	5.8644	11.134	11.014	9.8894	0.755018	1.65025	2.54581	6.27135
938	7.092	5.071	7.028	5.522	7.386	7.66	12.66	10.828	9.932	12.729	11.207	8.345	11.231	12.1	11.617	13.785	10.257	2.955	4.555	17.82	6.4198	10.9	10.7618	9.8744	1.0465	1.47359	2.10874	6.21984
939	7.926	6.029	5.926	5.577	6.1	9.106	13.744	10.675	9.804	12.2	10.481	9.534	11.35	13.413	11.416	13.38	10.4	3.219	4.251	15.948	6.3116	11.2388	11.1058	9.4396	0.924561	1.43627	1.87329	5.57732
940	6.691	3.922	4.804	4.944	5.177	6.507	11.168	10.121	10.075	11.987	12.191	7.01	8.917	11.047	10.401	12.282	10.204	1.508	3.283	15.625	5.1076	9.9132	9.9716	8.5804	1.00456	2.00828	2.09342	6.00095
941	5.354	3.99	5.357	4.898	6.02	6.162	11.768	12.041	9.796	11.888	10.144	7.98	10.049	11.823	10.102	13.702	9.606	2.414	2.315	16.684	5.1238	10.0196	10.331	8.9442	0.749506	1.36339	2.504	6.51093
942	5.574	3.716	5.301	3.906	5.357	7.151	11.993	10.826	9.877	10.491	9.604	8.533	10.562	12.227	9.933	12.588	11.29	4.006	3.59	17.299	4.7708	10.1718	10.0676	9.7546	0.88464	1.36393	1.80309	5.88116
943	6.215	2.8	6.003	4.892	5.892	6.607	11.366	9.005	10.506	10.45	10.835	9.506	11.171	13.212	11.006	13.901	9.882	3.974	4.672	15.564	5.1604	11.146	9.5868	9.5986	1.41429	1.32993	1.86904	5.24606
944	8	4.958	6.519	5.746	6.74	7.944	13.07	10.829	9.558	13.757	9.15	7.591	10.701	11.703	12.486	13.724	9.541	2.319	4.955	17.459	6.3926	10.3262	11.0316	9.5996	1.1398	1.97266	2.41499	6.19201
945	6.07	5.591	6.641	5.832	6.317	8.413	13.525	11.501	10.205	13.121	9.347	9.034	9.399	11.488	12.311	12.958	9.086	2.768	3.499	15.227	6.0902	10.3158	11.353	8.7076	0.409602	1.4813	2.11109	5.54797
946	5.068	3.553	5.689	5.793	6.159	5.852	12.069	9.864	9.708	11.065	11.336	8.436	9.765	12.526	11.273	13.209	10.736	2.812	3.476	15.292	5.2524	10.6672	9.7116	9.105	1.02795	1.586	2.36161	5.68044
947	7.198	3.729	5.13	4.87	6.114	6.525	12.325	10.052	10.207	11.917	11.918	9.946	12.921	13.554	11.192	14.221	10.093	3.413	3.852	15.648	5.4082	11.9062	10.2052	9.4454	1.31228	1.42282	2.29081	5.68713
948	6.812	4.638	5.167	5.502	5.933	6.184	11.836	9.952	8.9	11.244	10.714	9.296	11.08	13.662	9.569	13.346	11.408	2.958	3.803	17.56	5.6104	10.8642	9.6232	9.815	0.821862	1.73447	2.2351	6.28795
949	6.945	4.693	4.779	4.871	5.974	8.353	13.89	9.651	9.651	10.892	11.201	7.766	10.644	12.106	9.191	13.62	8.771	1.827	3.746	16.544	5.4524	10.1816	10.4874	8.9016	0.983375	1.71557	2.10334	6.2713
950	6.595	4.217	6.427	5.718	5.895	7.268	14.536	10.771	10.195	11.436	9.913	8.705	11.06	11.228	11.082	12.751	10.135	3.827	3.07	15.824	5.7704	10.3976	10.8412	9.1214	0.941065	1.08357	2.60747	5.56274
951	6.998	5.797	5.96	5.014	6.165	8.116	12.836	9.7	11.056	12.906	10.475	8.109	10.432	11.899	11.591	13.134	9.128	2.934	3.219	17.92	5.9868	10.5012	10.9228	9.267	0.713681	1.48909	2.06061	6.45238
952	7.473	4.624	5.654	5.417	5.536	8.051	13.006	10.874	10.162	11.783	11.769	7.497	10.15	12.265	11.032	11.967	9.958	1.769	3.768	17.082	5.7408	10.5426	10.7752	8.9088	1.04906	1.88016	1.85736	6.2181
953	7.148	5.073	5.923	5.197	5.655	7.686	13.759	10.929	9.629	12.228	10.53	8.881	11.231	13.843	11.502	13.812	10.858	3.881	4.515	16.125	5.7992	11.1974	10.8462	9.8382	0.828461	1.79612	2.33822	5.48132
954	7.629	4.899	4.604	4.038	5.774	8.003	13.538	10.83	9.887	11.509	9.785	10	11.372	13.755	9.283	12.581	10.794	3.321	4.368	16.717	5.3888	10.839	10.7534	9.5562	1.40066	1.80438	2.03998	5.65141
955	5.71	4.063	6.279	5.554	6.534	7.284	12.116	10.744	10.49	12.958	10.116	8.446	11.262	13.278	11.543	13.909	10.01	2.815	3.511	17.205	5.628	10.929	10.7184	9.49	0.962557	1.79109	2.16893	6.3171
956	6.576	4.862	6.41	5.301	6.514	7.485	12.872	11.885	10.707	13.132	11.306	8.072	10.402	11.685	12.231	13.156	9.49	2.837	2.904	18.261	5.9326	10.7392	11.2162	9.3296	0.794513	1.63317	2.29349	6.66857
957	6.916	5.145	5.997	5.404	6.26	7.451	13.298	12.389	10.346	13.147	11.353	9.082	11.803	12.459	12.652	12.291	10.361	3.475	4.262	17.924	5.9444	11.4698	11.3262	9.6626	0.703109	1.43199	2.4653	5.98122
958	6.326	5.007	6.32	5.364	5.945	6.834	14.039	10.591	10.694	13.222	11.176	9.227	10.85	13.013	11.787	13.591	10.627	3.182	3.913	17.868	5.7924	11.2106	11.076	9.8362	0.588803	1.38264	2.81782	6.29675
959	7.69	4.742	5.559	5.072	5.787	7.434	13.265	10.858	10.858	12.159	10.609	8.279	9.435	13.902	11.053	13.089	10.778	2.53	3.624	17.23	5.77	10.6556	10.9148	9.4502	1.14839	2.11171	2.19054	6.27222
960	6.993	4.672	5.527	5.365	5.915	6.899	12.512	11.312	10.698	12.864	9.646	9.633	11.56	13.639	11.765	12.61	11.101	3.517	4.74	17.712	5.6944	11.2486	10.857	9.936	0.85394	1.67751	2.3804	5.8561
961	7.245	4.564	5.659	5.691	5.723	7.214	13.023	10.514	11.061	12.83	10.191	8.933	11.694	13.368	11.576	14.392	10.763	3.629	3.846	17.91	5.7764	11.1524	10.9284	10.108	0.955331	1.67568	2.34465	6.34119
962	6.473	4.284	5.469	5.281	6.5	6.973	12.414	10.531	10.438	12.719	10.595	8.728	10.601	12.413	10.875	13.791	10.118	2.718	3.443	16.875	5.6014	10.6424	10.615	9.389	0.925054	1.30939	2.28942	6.24112
963	6.72	4.459	5.627	5.281	5.753	6.624	13.726	10.971	10.688	13.706	10.018	8.011	10.701	12.696	10.877	12.94	10.671	2.297	3.748	17.447	5.568	10.4606	11.143	9.4206	0.818086	1.69002	2.91114	6.35013
964	6.533	5.057	5.472	5.816	6.348	7.475	13.913	12.226	11.413	13.915	9.944	8.506	10.294	12.197	11.132	14.057	10.063	2.97	3.604	18.605	5.8452	10.4146	11.7884	9.8598	0.609768	1.37572	2.64453	6.72199
965	7.662	5.077	6.141	5.652	6.447	7.415	14.615	10.907	10.816	12.618	11.374	9.982	10.451	14.344	10.755	13.164	11.007	3.249	4.011	17.629	6.1958	11.3812	11.2742	9.812	0.969959	1.73157	2.65542	6.1338
966	6.919	5.119	5.931	5.375	5.993	8.036	13	11.523	10.967	13.686	10.471	8.901	11.457	13.572	12.141	13.395	10.223	3.555	4.172	18.227	5.8674	11.3084	11.4424	9.9144	0.694306	1.75613	2.19636	6.21945
967	7.246	4.642	6.033	5.637	6.795	8.061	14.492	11.395	10.36	13.285	10.712	8.9	11.089	12.039	11.365	13.824	10.801	3.283	4.09	18.16	6.0706	10.821	11.5186	10.0316	1.01694	1.17828	2.51366	6.36183
968	7.34	4.026	6.25	4.618	6.373	7.03	13.688	11.453	11.207	13.085	11.198	8.515	11.473	14.431	11.361	13.064	10.816	3.615	3.914	16.933	5.7214	11.3956	11.2926	9.6684	1.36159	2.0951	2.60545	5.81761
969	6.683	4.835	6.378	4.582	6.068	7.391	12.781	11.3	9.721	12.91	9.858	8.958	10.48	12.295	11.393	13.54	10.334	3.337	4.508	17.678	5.7092	10.5968	10.8206	9.8794	0.943282	1.30028	2.31354	6.04317
970	7.216	5.467	5.945	5.732	6.006	7.966	14.089	11.646	10.396	13.537	9.202	8.471	10.706	12.294	10.671	12.567	10.941	2.853	4.147	16.372	6.0732	10.2688	11.5268	9.376	0.672837	1.4853	2.47881	5.73297
971	6.952	5.075	6.552	5.113	6.583	7.844	13.565	10.655	10.931	13.319	10.972	8.74	10.434	13.228	12.094	13.238	10.523	3.3	3.627	17.881	6.055	11.0936	11.2628	9.7138	0.891371	1.69895	2.32894	6.28418
972	7.719	5.356	5.34	5.245	6.23	8.507	14.241	11.411	10.648	13.128	10.142	9.363	11.289	12.178	10.076	13.734	10.667	3.319	3.526	17.8	5.978	10.6096	11.587	9.8092	1.05188	1.11567	2.22584	6.35598
973	6.289	4.514	6.015	4.432	5.825	7.565	12.516	10.7	10.51	12.726	9.634	8.845	11.342	12.726	11.079	12.605	10.289	3.339	3.971	17.664	5.415	10.7252	10.8034	9.5736	0.87608	1.51943	2.07445	6.02941
974	6.224	4.876	7.022	6.336	7.085	7.988	14.148	11.174	10.955	13.483	10.165	8.847	10.326	12.258	11.985	12.851	10.809	2.899	4.167	18.383	6.3086	10.7162	11.5496	9.8218	0.890504	1.40863	2.43256	6.39036
975	6.117	4.701	7.125	5.424	6.804	7.405	14.681	11.842	11.874	13.511	10.465	8.297	11.24	12.68	13.158	12.899	10.676	3.287	3.694	19.32	6.0342	11.168	11.8626	9.9752	0.992353	1.93573	2.76276	6.71845
976	6.705	5.255	6.319	6.027	6.027	8.221	13.507	11.504	11.471	14.193	9.984	9.266	11.131	13.272	10.758	13.541	9.48	3.272	3.67	18.082	6.0666	10.8822	11.7792	9.609	0.532234	1.51718	2.32611	6.37766
977	6.78	5.085	6.281	5.82	6.511	7.739	14.327	11.312	10.622	12.693	10.663	8.457	10.957	12.778	11.016	12.647	11.019	3.241	4.136	17.823	6.0954	10.7742	11.3386	9.7732	0.665695	1.5402	2.46152	6.10446
978	7.955	4.865	6.207	6.305	6.664	7.857	13.774	11.663	11.14	12.643	10.18	8.162	10.249	13.894	10.911	13.134	11.246	2.991	3.956	17.119	6.3992	10.6792	11.4154	9.6892	1.10569	2.07119	2.22875	6.06687
979	7.007	4.805	6.176	4.725	5.602	8.509	13.814	11.61	10.53	13.129	10.172	9.231	11.25	13.333	10.699	12.583	10.353	2.372	4.167	17.347	5.663	10.937	11.5184	9.3644	0.960369	1.53224	2.11575	6.1434
980	7.492	4.32	6.953	5.576	6.114	7.492	14.175	11.69	10.816	13.134	10.787	8.42	10.574	12.141	11.925	12.86	10.085	2.774	4.112	18.307	6.091	10.7694	11.4614	9.6276	1.23572	1.48112	2.56837	6.39107
981	7.358	5.202	6.244	4.708	6.175	7.563	13.689	11.157	11.839	12.214	11.216	8.565	9.644	12.259	10.645	15.405	9.251	2.55	3.629	16.718	5.9374	10.4658	11.2924	9.5106	1.02723	1.42293	2.28137	6.51539
982	6.589	4.933	6.157	5.98	5.732	7.47	14.376	11.182	10.474	13.447	10.781	9.676	11.03	13.21	11.005	13.238	10.634	3.203	4.491	18.401	5.8782	11.1404	11.3898	9.9934	0.614025	1.2833	2.71091	6.28513
983	6.226	4.838	5.937	6.897	5.866	6.795	12.416	11.34	9.776	13.153	10.89	8.379	10.508	13.668	12.264	12.877	9.821	2.988	3.674	18.45	5.9528	11.1418	10.696	9.562	0.744432	1.98363	2.5236	6.47956
984	7.662	4.43	6.326	5.295	7.001	7.153	13.58	11.549	10.697	12.864	10.555	7.447	9.677	13.761	11.407	13.811	10.226	2.539	3.294	17.804	6.1428	10.5694	11.1686	9.5348	1.29716	2.31484	2.50905	6.61499
985	6.995	5.355	5.533	5.606	6.184	8.087	15.046	11.465	10.633	12.405	10.415	8.516	10.706	12.339	10.886	13.441	10.671	3.024	3.372	17.975	5.9346	10.5724	11.5272	9.6966	0.669299	1.36845	2.53924	6.48124
986	6.446	4.297	4.92	5.339	5.721	8.292	14.512	11.518	10.412	13.005	9.376	9.296	10.445	12.383	9.764	12.441	10.912	2.477	3.697	17.048	5.3446	10.2528	11.5478	9.315	0.811255	1.27455	2.38752	6.13273
987	6.659	4.401	7.162	5.737	6.469	7.157	14.428	12.129	11.359	12.514	10.109	9.071	11.767	12.823	11.629	13.261	10.82	3.279	4.226	17.751	6.0856	11.0798	11.5174	9.8674	1.07166	1.48243	2.68687	6.11979
988	6.494	4.966	5.294	4.982	5.177	8.594	13.866	10.276	10.315	13.157	9.225	9.373	10.467	12.582	10.121	14.002	10.977	3.1	4.559	17.088	5.3826	10.3536	11.2416	9.9452	0.636272	1.34797	2.19983	6.00853
989	7.04	4.006	5.786	6.685	6.685	7.235	12.874	11.728	10.751	12.862	9.029	8.468	10.978	11.802	11.063	12.792	9.966	3.372	3.934	18.765	6.0404	10.268	11.09	9.7658	1.22818	1.43739	2.32947	6.42406
990	7.602	5.133	6.566	5.094	6.407	7.21	13.558	12.216	11.023	13.569	11.188	8.689	10.524	12.959	11.58	13.495	11.049	3.446	4.494	17.668	6.1604	10.988	11.5152	10.0304	1.06022	1.56333	2.6296	6.02868
991	7.746	5.422	5.783	5.537	6.85	9.172	14.88	12.1	11.28	13.905	9.937	8.711	10.027	12.427	11.034	12.629	11.343	3.755	4.336	19.073	6.2676	10.4272	12.2674	10.2272	1.00106	1.38863	2.2412	6.36116
992	7.236	5.315	5.389	5.965	6.17	7.809	13.41	11.271	10.49	12.176	9.686	9.077	10.255	13.242	10.448	12.314	10.491	3.694	3.694	16.66	6.015	10.5416	11.0312	9.3706	0.774474	1.60157	2.1037	5.64584
993	6.927	3.655	5.91	4.932	6.335	6.8	13.345	11.224	11.139	12.84	10.016	7.689	10.117	12.222	11.012	13.328	10.239	3.116	3.116	18.41	5.5518	10.2112	11.0696	9.6418	1.28597	1.66531	2.5773	6.63322
994	8.15	5.743	6.04	6.338	6.125	7.39	14.527	12.123	10.676	14.164	9.465	8.191	11.084	13.284	10.506	12.14	10.513	3.912	3.627	17.227	6.4792	10.506	11.776	9.4838	0.958104	1.90357	2.90852	5.77535
995	6.261	5.522	5.751	5.116	6.342	7.304	14.217	11.247	10.74	13.446	9.566	8	10.625	12.042	11.839	12.322	9.167	3.292	3.458	18.224	5.7984	10.4144	11.3908	9.2926	0.513277	1.67869	2.70912	6.30501
996	7.719	5.921	7.1	6.537	7.489	7.982	14.825	12.641	11.905	13.68	10.833	8.869	10.13	15.174	11.602	13.25	11.055	3.321	4.035	17.749	6.9532	11.3216	12.2066	9.882	0.730366	2.37663	2.60547	6.16123
997	7.79	4.62	7.242	6.181	6.227	8.469	15.308	12.085	11.854	13.238	10.116	8.441	10.896	13.437	11.531	12.527	10.724	3.445	3.402	18.681	6.412	10.8842	12.1908	9.7558	1.21312	1.83675	2.48948	6.48986
998	6.97	4.829	5.695	5.291	6.592	7.882	14.032	10.404	10.583	12.825	9.513	8.084	11.42	11.591	9.058	13.327	10.522	2.866	3.251	16.457	5.8754	9.9332	11.1452	9.2846	0.891724	1.52651	2.38061	6.06049
999	6.419	4.356	6.539	6.264	6.996	8.757	13.434	10.471	12.209	12.849	9.532	8.853	9.739	12.616	11.294	11.695	11.111	2.568	3.586	17.558	6.1148	10.4068	11.544	9.3036	1.02037	1.52424	1.91285	6.22856
1000	5.959	3.988	5.877	4.738	6.333	7.304	13.311	11.708	10.569	11.617	9.977	8.238	10.969	12.996	10.387	13.968	10.308	3.172	4.097	17.722	5.379	10.5134	10.9018	9.8534	0.979832	1.72134	2.23722	6.26156
