# Supplementary material for: Molecular basis of wax-based color change and UV reflection in dragonflies
Source: eLife. 2019 Jan 15;8:e43045. doi: 10.7554/eLife.43045 (PMC6353593; doi:10.7554/eLife.43045)
Supplement: Figure 7—source data 2. [file elife-43045-fig7-data2.xlsx]

## Sheet: Omelania-CRAIC
	Male	Male	Male	Male	Male	Male	Male	Male	Male	Male	Male	Male	Male	Male	Male	Male	Male	Male	Male	Male	Male	Male	Male	Male	Male	Male	Male	Male	Male	Male	Male	Male	Male	Male	Male	Male	Male	Male	Male	Male	Male	Male	Male	Male	Male	Male	Male	Male	Male
wavelength	M5D1-1	M5D1-2	M5D1-3	M5D1-4	M5D1-5	M5D1-6	M5D2-1	M5D2-2	M5D2-3	M5D2-4	M5D2-5	M5D3-1	M5D3-2	M5D3-3	M5D3-4	M5D3-5	M5D3-6	M5D4-1	M5D4-2	M5D4-3	M5D4-4	M5D4-5	M5D5-1	M5D5-2	M5D5-3	M5D5-4	M5D5-5	M5V1-1	M5V1-2	M5V1-3	M5V1-4	M5V1-5	M5V1-6	M5V2-1	M5V2-2	M5V2-3	M5V2-4	M5V2-5	M5V2-6	M5V3-1	M5V3-2	M5V3-3	M5V3-4	M5V3-5	M5V4-1	M5V4-2	M5V4-3	M5V4-4	M5V4-5
380	25.5887	24.3661	27.4106	25.2784	25.3574	27.1369	26.2543	24.5024	25.4294	25.8569	25.6414	35.9893	45.6853	35.0507	34.2996	35.2475	33.1244	30.3884	29.0386	29.9726	36.1788	36.2981	32.382	38.3691	36.1658	36.0485	36.3606	14.8199	16.3857	14.8937	17.526	18.8829	19.6292	15.9463	16.8686	16.5119	18.6501	18.1736	17.3093	17.2696	19.7826	16.9991	18.2946	24.0418	17.9381	17.1857	17.9865	15.8172	16.9542
381	25.4451	24.0782	27.5057	25.1178	25.3058	26.9627	25.9832	24.1777	24.8733	25.5863	25.346	35.6604	45.414	34.6505	33.8063	34.9583	32.8839	29.9014	28.5635	29.5773	35.6472	35.7736	31.7366	38.01	35.6276	35.7632	36.0173	14.5647	16.4234	14.8752	17.1999	18.7562	19.4921	15.794	16.674	16.2392	18.2282	17.6626	17.003	16.8033	19.3322	16.6664	17.7656	23.6142	17.5981	16.6505	17.4542	15.2217	16.4757
382	25.4509	24.0387	27.4128	24.9816	25.3188	27.0351	25.7526	23.9819	24.5237	25.2325	25.2188	35.4739	45.2091	34.3593	33.2845	34.5207	32.3623	29.4363	28.0042	29.0695	35.3476	35.2818	31.3667	37.6048	35.1362	35.2495	35.5987	14.4709	16.2102	14.9735	16.9657	18.7433	19.2814	15.7619	16.3571	15.952	17.742	17.3755	16.8463	16.2359	19.092	16.2081	17.5837	23.1689	17.2259	16.1345	16.8832	14.8062	16.0799
383	25.2399	23.8187	27.2635	24.6619	24.9759	26.9034	25.2378	23.4163	24.169	24.7278	24.9692	35.1882	45.2093	33.973	32.782	34.143	31.8662	28.8841	27.6345	28.8013	34.8961	34.7712	30.994	37.3858	34.6299	34.7836	35.1084	14.3687	15.9582	14.4958	16.5455	18.5349	18.9949	15.3172	15.8592	15.5474	17.4331	17.0149	16.5676	15.9715	18.9679	15.8662	17.5086	22.782	16.9951	15.9305	16.5545	14.4904	15.7182
384	24.7783	23.2881	26.9489	24.3858	24.4445	26.3972	24.5252	22.9956	23.6708	24.1134	24.4153	34.7742	44.7471	33.5452	32.2421	33.5986	31.5954	28.4607	27.0584	28.458	34.3139	34.3903	30.2152	36.8356	33.9208	34.1272	34.3135	13.8737	15.5712	14.0339	16.3272	18.0153	18.566	14.7739	15.3645	14.8304	17.0923	16.4491	16.0105	15.6676	18.6853	15.4513	17.0181	22.4006	16.5072	15.4517	16.1715	14.0357	15.1884
385	24.4921	23.1054	26.767	24.0933	24.1956	26.1349	24.212	22.8201	23.4251	23.7395	24.077	34.3462	44.3228	33.2958	31.7611	33.1485	31.2282	28.0025	26.6432	28.023	33.7397	33.9633	29.697	36.4598	33.4114	33.5871	33.8601	13.7533	15.3813	13.8683	16.2194	17.7955	18.3742	14.5363	15.2025	14.4068	16.7511	16.0326	15.6665	15.2996	18.4981	15.0654	16.6809	22.074	15.9963	15.0737	15.8635	13.644	14.6098
386	24.1329	22.8738	26.5536	23.7161	24.0541	25.811	23.8902	22.4702	23.1586	23.4874	23.6789	34.0204	44.0811	32.9614	31.4867	32.8418	30.7997	27.7294	26.3276	27.6411	33.5404	33.5413	29.4166	36.2774	33.003	33.2435	33.6915	13.3582	15.0256	13.6442	15.7753	17.5366	18.1455	14.296	14.8711	14.125	16.3461	15.7263	15.2328	14.9629	18.4376	14.6868	16.4802	21.6641	15.5822	14.7307	15.5915	13.3653	14.261
387	23.9312	22.6617	26.4156	23.4382	23.7372	25.3916	23.5491	22.1306	22.713	23.0607	23.4341	33.5913	43.7	32.4409	31.0384	32.4204	30.2543	27.2472	25.8956	27.1554	33.112	33.1047	29.0772	36.0218	32.418	32.7744	33.3167	13.0415	14.6637	13.3224	15.4501	17.2697	17.8502	13.9523	14.5641	13.8616	16.0832	15.4005	14.9453	14.5295	18.171	14.177	16.1873	21.3818	15.1475	14.3371	15.1973	12.8868	14.0152
388	23.7839	22.4647	26.4419	23.2288	23.4768	25.2981	23.2936	21.9274	22.5855	22.7333	23.0929	33.3277	43.3686	32.1662	30.52	32.1169	30.1148	26.8485	25.5789	26.8325	32.8831	32.8317	28.6885	35.6606	32.1231	32.4294	33.0414	12.8574	14.6128	13.1704	15.2652	17.0259	17.5173	13.6694	14.2975	13.7898	16.0633	15.1988	14.7113	14.2785	18.0014	13.9614	16.0611	21.1781	14.8737	14.0916	15.014	12.5316	13.8219
389	23.4871	22.1389	26.3223	23.0421	23.346	25.256	23.0176	21.7215	22.2579	22.5317	22.7854	33.1737	43.3363	31.8766	30.0733	31.9404	30.0322	26.6478	25.4405	26.7029	32.8299	32.6117	28.5073	35.529	31.9361	32.1432	32.8703	12.6471	14.4726	12.851	15.1083	16.7428	17.2338	13.4784	14.0743	13.4877	15.6646	14.9522	14.4852	14.1791	17.9643	13.8806	16.0742	21.1226	14.7394	13.9812	14.8625	12.4319	13.5411
390	23.3617	21.9708	26.3725	23.024	23.1441	25.1858	22.9454	21.5959	22.0912	22.5529	22.6213	32.772	43.0832	31.6393	29.7264	31.7162	29.8462	26.3447	25.1804	26.3387	32.5689	32.2387	28.3425	35.482	31.5557	31.8378	32.3571	12.62	14.4365	12.7444	14.9922	16.7024	17.1342	13.3665	14.0369	13.4391	15.562	14.8943	14.5635	13.9386	17.9234	13.7572	16.0021	20.9931	14.5903	13.7392	14.7321	12.1858	13.3119
391	23.2861	21.7633	26.2284	22.7633	22.8545	24.929	22.567	21.3536	21.9083	22.3805	22.4236	32.5626	43.1989	31.6837	29.6328	31.7541	29.7523	26.1982	25.1276	26.2679	32.405	32.1661	28.227	35.578	31.5242	31.7382	32.2333	12.5587	14.4334	12.6382	14.7908	16.5185	16.874	13.3295	13.8409	13.2596	15.4143	14.7331	14.349	13.8989	17.9881	13.6447	16.0199	20.9341	14.534	13.7843	14.6703	12.1995	13.3375
392	23.3213	21.75	26.291	22.6342	22.7901	24.8498	22.4813	21.1032	21.7665	22.2359	22.2075	32.5025	43.174	31.5489	29.4999	31.6714	29.596	26.1822	24.9486	26.253	32.394	32.2482	28.1797	35.4225	31.3917	31.7671	32.1724	12.4692	14.3455	12.5284	14.8241	16.4979	16.6867	13.2278	13.8037	13.1947	15.4477	14.5317	14.1934	13.8795	18.1042	13.627	15.9986	20.8965	14.5328	13.8614	14.7212	12.1691	13.3294
393	23.1576	21.5722	26.3421	22.5523	22.7281	24.8553	22.3613	20.996	21.5852	22.0865	22.0953	32.3693	43.0035	31.1372	29.3729	31.392	29.3434	25.8426	24.6656	25.9508	32.0756	32.1764	28.0305	35.1532	31.2163	31.5568	31.8474	12.4593	14.3524	12.515	14.7785	16.4782	16.7292	13.2083	13.7593	13.1054	15.3185	14.4691	14.1541	13.7602	18.0965	13.4302	15.9717	20.841	14.3993	13.767	14.6509	11.9398	13.1942
394	22.9698	21.4693	26.2779	22.5468	22.6846	24.8337	22.3124	20.8777	21.5321	22.0831	22.1432	32.1094	42.9984	30.9395	29.2159	31.3369	29.2198	25.7762	24.5696	25.7808	32.0161	32.0994	27.7891	35.0229	31.1698	31.4559	31.6562	12.4344	14.2786	12.5062	14.6969	16.3221	16.5807	13.2039	13.6611	12.9913	15.1039	14.2928	14.1031	13.6602	18.1763	13.2957	16.048	20.7171	14.2922	13.6638	14.5895	11.8369	13.0115
395	22.8389	21.4229	26.4544	22.4766	22.626	24.8093	22.2172	20.8313	21.5852	21.9923	22.0883	31.9313	42.8435	30.8955	29.0576	31.1995	29.2085	25.8512	24.5058	25.7166	32.0306	31.9532	27.5777	34.9591	31.036	31.3132	31.5137	12.3712	14.3536	12.4699	14.6518	16.24	16.5076	13.024	13.5581	12.9618	14.9159	14.2504	14.035	13.6608	18.2349	13.2244	16.0089	20.7058	14.1549	13.5709	14.6398	11.8305	13.0072
396	22.7386	21.203	26.3058	22.2423	22.3451	24.6351	22.0303	20.7106	21.4254	21.7887	21.8614	31.6994	42.6574	30.7231	28.7731	30.9311	29.0479	25.7479	24.3946	25.4267	31.7901	31.6809	27.2857	34.705	30.7624	31.0789	31.2336	12.2566	14.3217	12.2619	14.4524	16.0881	16.3079	12.9512	13.5038	12.8659	14.9553	14.0022	13.8318	13.4471	18.3216	13.0188	15.9539	20.5826	13.9009	13.4457	14.4455	11.6754	12.9257
397	22.6968	21.125	26.292	22.1292	22.1715	24.5273	21.9197	20.7743	21.2794	21.7226	21.8132	31.5027	42.5813	30.5243	28.6267	30.7211	28.8613	25.5191	24.2212	25.1981	31.673	31.5857	27.023	34.4891	30.5389	30.8483	31.0667	12.1941	14.1895	12.2704	14.3561	16.0834	16.1991	12.9181	13.4102	12.6707	14.8724	13.9804	13.8285	13.3446	18.3834	13.0069	16.0056	20.5005	13.8564	13.3487	14.2849	11.5699	12.7537
398	22.6116	20.9762	26.3242	22.0761	22.0861	24.5618	21.8337	20.5992	21.0842	21.5548	21.5512	31.3762	42.5737	30.3312	28.473	30.439	28.7467	25.1829	24.0183	25.155	31.6044	31.3894	27.0214	34.3555	30.3582	30.7162	30.9449	12.1513	14.1029	12.1964	14.3544	15.9074	16.0541	12.8078	13.3074	12.6258	14.7693	13.8991	13.6623	13.2746	18.2949	12.8193	15.9855	20.4433	13.791	13.295	14.1972	11.4437	12.7231
399	22.4337	20.9133	26.2658	21.9187	22.053	24.661	21.6916	20.3647	20.9337	21.309	21.2835	31.2117	42.3984	30.1264	28.3551	30.3354	28.6437	25.1303	23.8284	25.0157	31.5515	31.244	26.9683	34.3387	30.1662	30.5547	30.7638	12.0566	14.1041	12.1977	14.2931	15.8245	16.0073	12.7397	13.2283	12.6031	14.706	13.8301	13.6005	13.2612	18.2901	12.7672	15.8879	20.3463	13.6675	13.2084	14.1357	11.3391	12.6701
400	22.3483	20.9383	26.297	21.7874	22.0224	24.5627	21.5633	20.191	20.9493	21.2547	21.2073	31.1374	42.2072	29.9459	28.1399	30.2509	28.4563	25.005	23.6556	24.8516	31.4248	31.194	26.8858	34.1914	30.0788	30.4309	30.509	12.0506	14.0806	12.1604	14.3153	15.8776	15.9693	12.7856	13.2377	12.5372	14.7547	13.793	13.6048	13.1372	18.3348	12.7002	15.9178	20.2361	13.6036	13.2215	14.0378	11.2571	12.6032
401	22.0426	20.7637	26.1711	21.6441	21.7908	24.3996	21.2725	19.9563	20.6204	21.0522	20.9788	31.0059	42.0007	29.8199	27.9735	30.0474	28.3781	24.8279	23.5118	24.6533	31.2467	31.0256	26.5387	34.0462	29.9839	30.1913	30.2726	11.8657	13.9184	12.0072	14.1061	15.6522	15.7241	12.6115	13.1472	12.3012	14.4949	13.5716	13.3177	13.0759	18.3162	12.6582	15.8701	20.0737	13.3915	13.1748	13.9232	11.1669	12.495
402	21.9291	20.611	26.1194	21.5212	21.613	24.2422	21.0666	19.7658	20.4614	20.884	20.8028	30.8065	41.9559	29.6275	27.839	29.8511	28.2321	24.613	23.3288	24.5643	31.0885	30.8869	26.3822	33.739	29.7427	30.019	30.0594	11.767	13.8206	11.8157	13.8976	15.4071	15.5538	12.3672	12.9982	12.1649	14.2563	13.3601	13.089	12.9271	18.266	12.4831	15.8204	20.0113	13.2912	13.0138	13.8589	11.0734	12.3572
403	21.7727	20.3271	26.1145	21.3959	21.4568	24.1381	20.7654	19.5989	20.2123	20.5754	20.5691	30.4822	41.7655	29.3126	27.5139	29.5088	27.9658	24.3368	23.0778	24.1819	30.973	30.6303	26.1775	33.4501	29.5287	29.6974	29.7689	11.6311	13.7546	11.6095	13.68	15.218	15.3064	12.1769	12.758	11.9574	14.0638	13.1664	12.9584	12.775	18.2149	12.312	15.6984	19.8276	13.0582	12.8265	13.6121	10.8191	12.183
404	21.6814	20.086	26.1743	21.2447	21.3317	24.1327	20.5837	19.4578	20.1416	20.44	20.5184	30.2044	41.4525	29.178	27.1803	29.2654	27.6908	24.0854	22.8266	23.9366	30.793	30.4349	25.9789	33.2095	29.3876	29.3504	29.4705	11.543	13.7364	11.5456	13.653	15.2102	15.0946	12.1633	12.7269	11.8492	14.0267	13.117	12.8734	12.5876	18.188	12.1381	15.5479	19.7085	12.8026	12.6198	13.4129	10.5859	12.0537
405	21.627	20.0216	26.171	21.2483	21.3112	24.0738	20.4916	19.4305	19.9848	20.3415	20.4391	30.0651	41.1558	29.0367	26.8913	29.1112	27.5423	23.8352	22.6195	23.7384	30.5945	30.2986	25.7445	32.9972	29.2673	29.1384	29.2431	11.5621	13.7141	11.5747	13.6123	15.2136	15.0071	12.1696	12.7683	11.8509	13.9259	13.0202	12.8527	12.5613	18.2344	11.9294	15.5502	19.5775	12.7386	12.6149	13.2712	10.5154	11.9005
406	21.5701	19.9796	26.1376	21.1906	21.1922	23.9637	20.4169	19.3154	19.8147	20.1994	20.3114	29.8757	41.1032	28.889	26.7367	28.9313	27.285	23.6403	22.4488	23.5618	30.5131	30.2497	25.5755	32.732	29.1397	28.9654	29.1014	11.5593	13.7318	11.6133	13.5512	15.072	15.004	12.1623	12.7137	11.7502	13.8205	12.9472	12.7383	12.4425	18.3168	11.7869	15.5563	19.5303	12.6452	12.5229	13.1718	10.4747	11.7711
407	21.4145	19.8926	26.1314	21.0817	21.0376	23.8877	20.2074	19.0929	19.6673	20.0813	20.1511	29.6413	40.8767	28.7191	26.5923	28.7362	27.0882	23.3945	22.2986	23.3954	30.355	30.1349	25.3405	32.4621	28.9174	28.7839	28.9225	11.5148	13.6336	11.4534	13.4048	14.9276	14.9276	11.9619	12.6785	11.6026	13.7209	12.7303	12.5375	12.3091	18.3459	11.7126	15.5605	19.357	12.4662	12.3629	13.0959	10.3879	11.6521
408	21.346	19.7776	26.0875	20.9763	20.9059	23.8859	20.0631	18.9482	19.5992	19.9806	20.0352	29.3988	40.6303	28.5476	26.3825	28.5943	26.9866	23.3358	22.147	23.2416	30.0778	29.8907	25.1468	32.2229	28.6869	28.6006	28.6309	11.4325	13.5003	11.3309	13.3538	14.8054	14.7906	11.8469	12.6169	11.5855	13.6192	12.6353	12.4722	12.1434	18.3281	11.6166	15.598	19.1488	12.3099	12.2225	12.9515	10.303	11.5101
409	21.1572	19.5588	26.0349	20.8329	20.8292	23.7763	19.859	18.8542	19.419	19.7732	19.8885	29.1585	40.4175	28.4252	26.1006	28.459	26.7932	23.2044	21.9922	23.0391	29.9892	29.6964	25.0589	32.0698	28.6064	28.372	28.4235	11.3534	13.3567	11.2196	13.2673	14.6175	14.6187	11.7224	12.4886	11.4644	13.5157	12.5827	12.3841	12.051	18.2808	11.5203	15.5427	19.0005	12.1951	12.0926	12.843	10.2162	11.4228
410	21.0164	19.3806	25.908	20.6518	20.7539	23.6707	19.7351	18.6983	19.2058	19.6005	19.7336	28.9295	40.1409	28.2269	25.8372	28.2545	26.5104	22.8991	21.8498	22.8101	29.8685	29.4968	24.9287	31.8404	28.4738	28.1219	28.2717	11.235	13.1991	11.087	13.0896	14.481	14.5177	11.7141	12.4204	11.3569	13.4708	12.5064	12.2317	11.8634	18.2412	11.3415	15.4918	18.8582	11.9949	11.9683	12.7659	10.0708	11.2862
411	20.9388	19.2899	25.8213	20.551	20.6049	23.5203	19.6447	18.6181	19.0903	19.4912	19.6139	28.778	39.9709	27.9923	25.6782	28.0384	26.3832	22.6804	21.6643	22.5889	29.6812	29.3382	24.7065	31.5922	28.3165	27.9025	28.0413	11.1684	13.1237	11.0793	12.9548	14.3661	14.4263	11.6284	12.3183	11.2828	13.3831	12.3969	12.1549	11.7511	18.2793	11.1959	15.4628	18.7383	11.8865	11.8389	12.6817	9.9935	11.1233
412	20.8527	19.174	25.7409	20.4105	20.4705	23.335	19.5477	18.4749	19.0169	19.3364	19.4765	28.5762	39.8068	27.7309	25.4469	27.7831	26.1992	22.5586	21.4844	22.4121	29.5202	29.2301	24.4399	31.3454	28.1457	27.6829	27.7957	11.0484	13.0351	11.0655	12.8852	14.2632	14.2687	11.4981	12.2581	11.2184	13.2108	12.2603	12.031	11.6666	18.2728	11.1293	15.4483	18.6351	11.7098	11.6845	12.5903	9.8914	10.9861
413	20.6093	18.9735	25.5108	20.2633	20.319	23.191	19.4345	18.3266	18.9084	19.1537	19.3062	28.3865	39.7272	27.5837	25.2885	27.6651	25.9814	22.3789	21.3733	22.1851	29.3992	29.1889	24.2355	31.175	28.015	27.5149	27.6436	10.8797	12.8927	10.8443	12.7526	14.1198	14.1416	11.3816	12.2201	11.1147	13.1155	12.1045	11.8659	11.6086	18.2074	11.056	15.4571	18.5239	11.6426	11.6436	12.5537	9.8456	10.9011
414	20.4487	18.8722	25.4154	20.1249	20.2282	23.1775	19.3173	18.1592	18.7966	19.0144	19.2153	28.2684	39.6106	27.4589	25.1555	27.6116	25.8518	22.1852	21.2023	22.0631	29.3292	29.1035	24.1371	31.0787	27.9726	27.4054	27.5007	10.8043	12.815	10.6742	12.5958	13.9985	13.9944	11.3406	12.1491	11.0392	13.0671	12.0279	11.8055	11.5947	18.2767	10.9555	15.4911	18.4455	11.6138	11.5669	12.5032	9.8587	10.7824
415	20.4171	18.7618	25.4606	20.1128	20.1665	23.1843	19.2672	18.0452	18.6949	18.9152	19.1547	28.1263	39.4308	27.3003	25.0277	27.4069	25.6926	22.0422	21.121	21.9396	29.2481	28.9907	24.0863	30.9923	27.9994	27.306	27.3863	10.7952	12.8182	10.6949	12.6288	13.9887	13.8706	11.3283	12.1498	10.9924	13.0485	11.9429	11.8262	11.5443	18.3691	10.8756	15.5299	18.3762	11.5092	11.4847	12.3911	9.864	10.7035
416	20.3012	18.5867	25.3775	19.9807	19.9731	22.9988	19.0924	17.9044	18.5139	18.7693	18.988	28.0118	39.2968	27.2588	24.9075	27.3196	25.5799	21.8884	21.0318	21.8035	29.1085	28.9502	23.9616	30.8258	28.0066	27.1732	27.301	10.6991	12.7115	10.6401	12.5451	13.8224	13.7207	11.2562	12.0611	10.9134	12.9128	11.8699	11.7087	11.4488	18.4241	10.7717	15.5406	18.2846	11.417	11.3776	12.3165	9.8107	10.6751
417	20.1541	18.3814	25.2776	19.7243	19.7115	22.7987	18.8998	17.7286	18.2777	18.5789	18.7787	27.8095	39.0306	27.1264	24.7433	27.1555	25.4048	21.6687	20.8083	21.6179	28.9563	28.7779	23.723	30.6233	27.8469	26.9144	27.0854	10.4995	12.545	10.5099	12.3928	13.643	13.5804	11.1292	11.9426	10.778	12.7768	11.749	11.5745	11.3087	18.4465	10.5984	15.42	18.1295	11.2323	11.2595	12.2134	9.779	10.5589
418	20.0243	18.2537	25.2072	19.5893	19.5564	22.6709	18.8151	17.6247	18.1646	18.4523	18.6318	27.6247	38.823	26.992	24.618	26.9639	25.28	21.5461	20.656	21.5025	28.8386	28.6858	23.6131	30.4799	27.7282	26.7964	26.936	10.3964	12.3744	10.4574	12.2785	13.5096	13.4329	10.9861	11.8673	10.728	12.6772	11.6602	11.4958	11.2019	18.3878	10.4857	15.3783	18.0246	11.1207	11.1224	12.0844	9.7813	10.4528
419	19.8998	18.1263	25.08	19.4354	19.4324	22.514	18.6772	17.4981	18.0577	18.3446	18.5069	27.3581	38.5464	26.8258	24.4585	26.8393	25.1069	21.386	20.4878	21.3285	28.7323	28.596	23.4454	30.2688	27.639	26.6736	26.7671	10.2835	12.1951	10.3285	12.1732	13.386	13.2522	10.8272	11.7407	10.5857	12.5236	11.4848	11.3779	11.1048	18.3323	10.3199	15.336	17.9046	10.9644	10.9649	11.9689	9.7119	10.2952
420	19.7088	17.9936	24.9647	19.3353	19.3053	22.3915	18.5694	17.4143	17.962	18.1754	18.4215	27.0939	38.3828	26.6575	24.2811	26.7127	24.9617	21.2112	20.3458	21.1817	28.611	28.5003	23.3646	30.1652	27.5523	26.5691	26.6486	10.2252	12.1429	10.2714	12.0829	13.2437	13.1052	10.6963	11.6774	10.4621	12.4652	11.3608	11.2342	10.9822	18.2848	10.2027	15.3143	17.7748	10.8297	10.8944	11.8809	9.6191	10.2349
421	19.5494	17.8683	24.9541	19.1644	19.2232	22.3013	18.5062	17.2977	17.8291	18.0878	18.3562	26.9551	38.3401	26.5959	24.1197	26.5716	24.9173	21.0334	20.1917	21.0452	28.4631	28.4102	23.2497	29.997	27.437	26.4582	26.5535	10.1221	12.1107	10.1749	11.9806	13.0943	13.0443	10.6372	11.6157	10.3611	12.3937	11.3246	11.1375	10.9162	18.359	10.1465	15.3451	17.7019	10.7936	10.8123	11.7711	9.6223	10.1317
422	19.397	17.7277	24.8862	19.0433	19.0415	22.1754	18.3982	17.172	17.6899	18.0357	18.2058	26.7726	38.2038	26.4969	23.9754	26.3617	24.7699	20.9138	20.0842	20.8554	28.3122	28.2902	23.1089	29.7823	27.3149	26.3241	26.4442	9.9646	12.0166	10.0828	11.8374	13.0188	12.863	10.6091	11.5357	10.2468	12.2819	11.223	11.0031	10.8723	18.414	10.0545	15.3497	17.5992	10.7211	10.7022	11.675	9.6207	10.0596
423	19.1782	17.5502	24.7665	18.9047	18.8003	22.0025	18.2242	17.0334	17.5339	17.8037	18.0611	26.5889	37.9058	26.3663	23.8134	26.1502	24.664	20.7383	19.9376	20.666	28.1527	28.1316	22.9486	29.6114	27.196	26.1565	26.2889	9.7665	11.8357	9.9019	11.6397	12.8073	12.7087	10.4562	11.4176	10.0357	12.0652	11.0253	10.8323	10.7577	18.3706	9.9074	15.3023	17.4889	10.5257	10.6076	11.5752	9.5816	9.9421
424	19.0232	17.377	24.6879	18.7241	18.5951	21.8211	18.0232	16.8716	17.3724	17.6492	17.9386	26.3345	37.6448	26.1583	23.6354	25.9739	24.5286	20.5424	19.7536	20.4955	27.957	27.9278	22.7815	29.4506	27.0762	25.9131	26.0996	9.7001	11.7146	9.7567	11.5298	12.6666	12.6015	10.2793	11.3366	9.9508	11.9486	10.887	10.777	10.648	18.3185	9.7946	15.2128	17.3463	10.4121	10.5131	11.4252	9.5623	9.8497
425	18.8138	17.199	24.5136	18.4969	18.3794	21.6129	17.809	16.6414	17.1233	17.5082	17.7163	26.0278	37.4724	25.9359	23.4459	25.7528	24.4247	20.3514	19.5397	20.3207	27.7701	27.8174	22.5725	29.1881	26.9031	25.6544	25.8664	9.6169	11.5352	9.6476	11.4183	12.5042	12.4122	10.0733	11.1782	9.8472	11.8335	10.7798	10.6653	10.5266	18.2369	9.6928	15.1756	17.1779	10.2286	10.3182	11.2671	9.4978	9.7288
426	18.6423	16.9931	24.3953	18.3449	18.2463	21.4724	17.6357	16.4677	16.9149	17.3264	17.5697	25.8496	37.3107	25.8174	23.231	25.6071	24.2422	20.1688	19.349	20.1449	27.5355	27.701	22.382	28.9226	26.7649	25.4535	25.6563	9.5273	11.431	9.5386	11.264	12.3562	12.2714	9.9703	11.046	9.7121	11.6672	10.6775	10.5391	10.4225	18.2236	9.5876	15.1285	17.0498	10.0749	10.1711	11.1425	9.4674	9.6008
427	18.4666	16.8315	24.358	18.1485	18.106	21.3266	17.4594	16.3212	16.7779	17.1245	17.4434	25.6603	37.0362	25.6309	23.0614	25.4009	23.9252	19.9426	19.0804	19.9004	27.3264	27.52	22.1815	28.6718	26.6214	25.2691	25.4874	9.41	11.3013	9.4312	11.0832	12.201	12.1166	9.853	10.9888	9.5498	11.4987	10.5596	10.4363	10.26	18.1699	9.4283	15.0931	16.8801	9.9508	10.036	11.0109	9.4807	9.4602
428	18.3823	16.7405	24.1966	17.9249	17.8961	21.1523	17.3242	16.2228	16.6576	16.9561	17.2805	25.4489	36.8192	25.4771	22.8718	25.1963	23.781	19.8023	18.9113	19.758	27.103	27.3541	21.9882	28.4727	26.4477	25.1167	25.3271	9.2414	11.213	9.31	10.9824	12.1213	11.9803	9.7091	10.8942	9.4661	11.3972	10.3938	10.2758	10.1287	18.153	9.2985	15.057	16.7366	9.8322	9.9066	10.8621	9.4283	9.3576
429	18.2522	16.6553	24.0548	17.8044	17.8192	21.0384	17.309	16.1117	16.6313	16.9601	17.1942	25.2553	36.607	25.321	22.6947	25.0571	23.7425	19.6707	18.7996	19.6221	26.9174	27.2245	21.8305	28.2459	26.3322	24.9707	25.1394	9.1451	11.149	9.2161	10.9445	12.0292	11.9352	9.6367	10.8451	9.4183	11.3574	10.3209	10.2172	10.07	18.0636	9.2033	15.0925	16.6547	9.7158	9.8041	10.7434	9.363	9.3024
430	18.0393	16.483	23.9437	17.5832	17.6458	20.8344	17.1073	15.9159	16.393	16.789	16.9381	24.9537	36.3723	25.1688	22.468	24.8594	23.534	19.462	18.5551	19.3752	26.6663	27.0209	21.6508	27.9491	26.051	24.7354	24.8055	8.9506	10.9461	9.0518	10.7912	11.8042	11.7411	9.4818	10.6706	9.2768	11.1858	10.1345	10.1015	9.9141	17.9345	9.0244	14.9994	16.5026	9.548	9.596	10.5448	9.3067	9.1673
431	17.8904	16.2956	23.8394	17.4004	17.4785	20.7068	16.9198	15.7373	16.2266	16.579	16.7293	24.6936	36.1106	24.9556	22.1627	24.5922	23.2838	19.2339	18.3315	19.1603	26.3854	26.7978	21.428	27.6169	25.7788	24.498	24.5576	8.8163	10.7984	8.9408	10.6266	11.6123	11.5717	9.3257	10.4883	9.1403	11.0027	9.9551	9.9557	9.7461	17.7913	8.8787	14.8869	16.2822	9.3458	9.397	10.3564	9.2275	8.9558
432	17.79	16.1848	23.7623	17.2406	17.3762	20.6068	16.7629	15.5671	16.0959	16.4406	16.6062	24.4621	35.8641	24.6915	21.8977	24.3601	23.0429	18.9986	18.1233	18.9319	26.087	26.5534	21.1817	27.3019	25.5256	24.2329	24.3153	8.6964	10.7215	8.8575	10.5267	11.5016	11.4795	9.1896	10.3598	9.07	10.8937	9.8319	9.8465	9.6257	17.6835	8.7278	14.8235	16.0843	9.1669	9.237	10.1923	9.1617	8.7786
433	17.6459	16.0495	23.6649	17.1173	17.2577	20.5084	16.6325	15.4303	15.9675	16.3583	16.5376	24.3346	35.6715	24.5538	21.7455	24.2282	22.8893	18.8363	17.9355	18.7492	25.8761	26.3539	21.0387	27.134	25.328	24.0706	24.1885	8.5755	10.6319	8.7749	10.4112	11.4005	11.364	9.0604	10.2768	8.9824	10.7708	9.7324	9.7248	9.523	17.6511	8.5971	14.7564	15.9851	9.0442	9.0956	10.0303	9.1038	8.6639
434	17.5384	15.919	23.5329	16.9852	17.1469	20.4471	16.495	15.3293	15.8368	16.2283	16.4366	24.1337	35.4898	24.4157	21.6291	24.0428	22.7521	18.7038	17.8167	18.5825	25.6577	26.1655	20.9024	26.9176	25.1153	23.9251	24.0354	8.513	10.5141	8.7075	10.2872	11.2741	11.3049	8.9454	10.1716	8.8793	10.629	9.6378	9.6273	9.414	17.6282	8.4475	14.7048	15.8407	8.9236	8.9555	9.8955	9.0361	8.5642
435	17.3597	15.7397	23.4389	16.7701	16.995	20.2342	16.3043	15.1404	15.6657	16.0082	16.2557	23.9712	35.3305	24.2206	21.4397	23.8883	22.505	18.5218	17.6523	18.435	25.4182	25.9861	20.7708	26.6681	24.9259	23.7181	23.875	8.3802	10.3595	8.575	10.1737	11.1056	11.1433	8.791	9.9874	8.7641	10.4832	9.5087	9.5416	9.3042	17.6338	8.357	14.7186	15.7256	8.7992	8.8499	9.7938	8.9521	8.4409
436	17.2004	15.5302	23.2788	16.6073	16.8176	20.0982	16.1279	14.9292	15.4609	15.8522	16.0731	23.6895	35.121	23.935	21.1511	23.6484	22.216	18.3114	17.3745	18.2572	25.1645	25.7971	20.4622	26.3688	24.6776	23.5019	23.6142	8.2697	10.2701	8.466	10.0636	10.934	11.0063	8.6608	9.8306	8.6813	10.3717	9.3214	9.3884	9.1828	17.5245	8.2052	14.6464	15.5334	8.6677	8.6736	9.6366	8.8422	8.301
437	17.0429	15.4142	23.1735	16.4885	16.669	19.9855	15.9807	14.7677	15.3641	15.6977	15.9577	23.4231	34.8637	23.7332	20.8836	23.4203	22.0121	18.0799	17.1511	18.0573	24.9017	25.5457	20.2561	26.0268	24.4182	23.273	23.3331	8.1693	10.1823	8.3902	9.9616	10.8204	10.9087	8.5308	9.7139	8.5921	10.2014	9.1585	9.2889	9.0667	17.3744	8.067	14.5685	15.3723	8.5421	8.5297	9.4645	8.7814	8.1682
438	16.8655	15.2813	23.0973	16.3566	16.5932	19.8145	15.8561	14.6694	15.2718	15.5903	15.8567	23.2658	34.6787	23.5989	20.7381	23.2482	21.8538	17.9157	17.0129	17.8795	24.6725	25.3584	20.1143	25.7585	24.2561	23.106	23.1782	8.0988	10.0991	8.3233	9.8964	10.7315	10.8135	8.4235	9.6371	8.5112	10.0926	9.0992	9.2208	8.9609	17.3062	7.9683	14.5024	15.276	8.4161	8.4347	9.3736	8.7241	8.0621
439	16.7341	15.1954	22.9766	16.2517	16.5155	19.7482	15.7199	14.5689	15.1426	15.4704	15.7782	23.0974	34.5937	23.4397	20.6144	23.1351	21.7317	17.7985	16.8506	17.7552	24.5107	25.2535	19.9978	25.5914	24.1333	22.9759	23.0388	8.0152	10.0088	8.2493	9.8103	10.6066	10.7292	8.354	9.5354	8.4534	9.9915	9.0184	9.1351	8.8936	17.3468	7.8899	14.5186	15.2211	8.3329	8.3405	9.2913	8.6981	7.9857
440	16.682	15.1427	22.9463	16.1685	16.4241	19.6766	15.6244	14.4934	15.071	15.425	15.698	22.9715	34.4626	23.3117	20.5005	23.0569	21.6007	17.6977	16.7168	17.6431	24.328	25.1664	19.86	25.438	24.0382	22.8573	22.8823	8.0013	9.9875	8.2566	9.8032	10.5356	10.6548	8.3063	9.4744	8.428	9.9369	8.9557	9.0922	8.8226	17.3914	7.8313	14.5208	15.1408	8.2476	8.2662	9.2127	8.6759	7.9112
441	16.5576	15.0246	22.844	16.0405	16.3084	19.5547	15.5714	14.3755	14.94	15.3114	15.5469	22.8351	34.3677	23.231	20.37	22.9288	21.4433	17.5951	16.5934	17.5133	24.2103	25.066	19.7751	25.2296	23.8982	22.705	22.6993	7.9265	9.8978	8.2053	9.6801	10.4624	10.5487	8.229	9.3789	8.3444	9.8319	8.8352	9.0023	8.7891	17.41	7.7613	14.4774	15.0544	8.1548	8.1964	9.1492	8.6633	7.844
442	16.3948	14.9275	22.698	15.921	16.1374	19.4253	15.4715	14.2068	14.8032	15.1607	15.4193	22.6698	34.2455	23.1203	20.2133	22.778	21.3343	17.4701	16.4406	17.3815	24.0636	24.8965	19.6346	25.0221	23.6754	22.5458	22.5817	7.8291	9.8144	8.115	9.5483	10.3706	10.4634	8.1674	9.2664	8.2578	9.7312	8.7306	8.9206	8.7038	17.3659	7.6633	14.417	14.9702	8.0531	8.1019	9.071	8.6173	7.7837
443	16.294	14.8531	22.6346	15.8569	16.0149	19.3511	15.3565	14.1222	14.7133	15.0843	15.3525	22.54	34.1271	23.0326	20.1011	22.6739	21.2509	17.3456	16.3218	17.2524	23.9065	24.7529	19.5047	24.8509	23.5968	22.4238	22.4675	7.7617	9.7663	8.0279	9.49	10.2844	10.3918	8.1304	9.2276	8.2196	9.658	8.6722	8.8795	8.6319	17.2947	7.5463	14.385	14.8809	7.9582	8.0049	8.982	8.6091	7.6898
444	16.1851	14.776	22.5672	15.7511	15.916	19.2632	15.305	14.0343	14.6227	14.9909	15.2843	22.4908	34.0546	22.9953	20.0534	22.6203	21.1439	17.2195	16.2278	17.2043	23.8351	24.7	19.4254	24.7894	23.5681	22.348	22.3923	7.703	9.694	7.9473	9.4292	10.2083	10.3214	8.0347	9.2082	8.1791	9.5936	8.6024	8.8185	8.6059	17.2548	7.4911	14.3501	14.824	7.9151	7.9268	8.9182	8.6266	7.6447
445	16.0495	14.6755	22.498	15.6465	15.8265	19.1912	15.2119	13.9688	14.5449	14.9126	15.2023	22.3734	33.9898	22.9073	19.9807	22.5052	21.0234	17.1082	16.1347	17.0829	23.7668	24.6917	19.3248	24.6708	23.5095	22.2441	22.2978	7.6667	9.6014	7.8924	9.3741	10.085	10.2231	7.9658	9.1714	8.1356	9.5369	8.5151	8.7408	8.5297	17.2568	7.4713	14.3791	14.7702	7.8613	7.8508	8.8457	8.6281	7.5785
446	15.876	14.5375	22.3215	15.4856	15.6534	19.1417	15.1653	13.8486	14.4043	14.7488	15.0279	22.197	33.9031	22.811	19.9198	22.393	20.9215	16.9422	15.9602	16.8976	23.6515	24.6306	19.212	24.5392	23.5192	22.1455	22.1986	7.619	9.5322	7.868	9.2419	9.9639	10.1918	7.8191	9.074	8.0293	9.4189	8.5018	8.7161	8.4728	17.3152	7.4126	14.4043	14.7121	7.8015	7.7224	8.6975	8.6233	7.5394
447	15.7669	14.4339	22.2564	15.4189	15.5944	19.0471	15.0398	13.7437	14.3304	14.6676	14.9177	22.097	33.7459	22.7042	19.7675	22.2225	20.7841	16.7849	15.8102	16.7537	23.5168	24.5161	19.0809	24.4178	23.4637	21.9942	22.1015	7.5292	9.4957	7.8236	9.1397	9.9136	10.139	7.7652	9.0558	7.9735	9.3563	8.4367	8.689	8.4126	17.3187	7.356	14.3675	14.6516	7.7186	7.6263	8.6154	8.6103	7.4701
448	15.743	14.452	22.2727	15.4184	15.5992	18.9533	14.9093	13.7297	14.3271	14.6844	14.8961	22.0782	33.6702	22.6332	19.685	22.1334	20.7033	16.7648	15.7783	16.762	23.3929	24.4166	18.9692	24.3111	23.3962	21.8972	21.9746	7.4978	9.4473	7.7784	9.1434	9.9243	10.0947	7.8183	9.0904	7.9865	9.3526	8.3411	8.6206	8.3549	17.3745	7.3191	14.3532	14.5736	7.6534	7.6663	8.642	8.5607	7.4217
449	15.6475	14.386	22.2008	15.335	15.4981	18.8633	14.857	13.6343	14.2221	14.5827	14.7995	21.9927	33.5689	22.5375	19.598	22.0535	20.5724	16.653	15.7005	16.6288	23.2653	24.3385	18.8711	24.1601	23.2961	21.7882	21.811	7.4526	9.3604	7.7498	9.0627	9.8529	10.025	7.7433	9.0745	7.9275	9.2681	8.2528	8.5859	8.3352	17.394	7.2965	14.3425	14.5172	7.6077	7.6135	8.609	8.5781	7.3868
450	15.5565	14.3227	22.1579	15.2721	15.3826	18.793	14.7832	13.5621	14.1141	14.4741	14.7303	21.8415	33.3918	22.3781	19.4633	21.939	20.4329	16.5356	15.5937	16.5029	23.1468	24.2632	18.7193	23.9972	23.2364	21.6434	21.6583	7.4483	9.3233	7.7206	9.0466	9.8163	9.9741	7.6854	9.076	7.8749	9.2669	8.1998	8.5693	8.28	17.3746	7.2168	14.3239	14.4822	7.5418	7.5369	8.5603	8.5857	7.3424
451	15.4693	14.2601	22.0884	15.2341	15.3272	18.7541	14.723	13.5211	14.0404	14.4639	14.6915	21.7213	33.3602	22.3099	19.3503	21.8641	20.3373	16.4502	15.5375	16.4458	23.1038	24.2239	18.6371	23.9465	23.2167	21.5437	21.552	7.4569	9.3616	7.6682	9.0129	9.7894	9.9313	7.6614	9.086	7.8528	9.2419	8.2008	8.5647	8.2835	17.3987	7.1884	14.3327	14.5081	7.5169	7.5214	8.533	8.6299	7.3308
452	15.4409	14.2024	22.0868	15.2572	15.3261	18.7511	14.7233	13.5308	14.1141	14.4973	14.6956	21.7074	33.4127	22.3631	19.2589	21.8889	20.3419	16.4245	15.5062	16.4478	23.1165	24.296	18.5921	23.9781	23.283	21.5573	21.5256	7.4747	9.3701	7.6839	9.03	9.7669	9.9571	7.728	9.1401	7.8857	9.2405	8.2222	8.5918	8.3258	17.4832	7.2052	14.3773	14.5288	7.5384	7.5682	8.5449	8.6738	7.3571
453	15.4098	14.151	22.0572	15.238	15.2927	18.704	14.6877	13.5187	14.1243	14.4488	14.6923	21.72	33.4337	22.3481	19.2497	21.8821	20.2954	16.3887	15.485	16.4207	23.0948	24.3218	18.582	23.9433	23.336	21.5599	21.5376	7.4526	9.3914	7.7029	9.0316	9.7588	9.9468	7.734	9.1314	7.9013	9.2475	8.2246	8.573	8.3252	17.5083	7.1953	14.4205	14.5356	7.54	7.5758	8.5511	8.711	7.3302
454	15.2717	14.0177	21.9379	15.1351	15.23	18.611	14.5803	13.4285	14.0596	14.3398	14.6482	21.6092	33.3466	22.2328	19.1869	21.7495	20.1573	16.2948	15.3902	16.3457	23.0452	24.2606	18.4755	23.8564	23.325	21.4578	21.4959	7.4309	9.3337	7.6543	8.965	9.6674	9.9049	7.654	9.0918	7.9049	9.1721	8.1762	8.5162	8.2813	17.5214	7.1712	14.4385	14.5171	7.5074	7.5224	8.5094	8.7511	7.275
455	15.2059	13.9455	21.9624	15.1127	15.1554	18.5608	14.5395	13.3806	14.0059	14.297	14.6127	21.4809	33.2998	22.1485	19.0856	21.625	20.0771	16.2246	15.3212	16.2456	23.0042	24.2026	18.3761	23.7832	23.289	21.3517	21.4224	7.4405	9.2926	7.6518	8.9561	9.6203	9.8867	7.6187	9.0898	7.9141	9.165	8.114	8.483	8.2234	17.5097	7.1676	14.4595	14.4249	7.4781	7.4869	8.4855	8.7911	7.2403
456	15.0994	13.8665	21.9432	15.0544	15.0627	18.4489	14.4577	13.3083	13.881	14.2034	14.5162	21.3506	33.1968	22.0387	18.9793	21.5441	20.0044	16.139	15.2315	16.1341	22.9554	24.1452	18.2741	23.6651	23.1636	21.2154	21.2907	7.4108	9.2494	7.5873	8.8757	9.5831	9.7704	7.602	9.0488	7.8547	9.1268	8.0505	8.4432	8.1611	17.4722	7.1035	14.467	14.3489	7.4241	7.4597	8.4229	8.8027	7.1894
457	14.9968	13.7771	21.8954	14.9685	15.0177	18.3403	14.3872	13.2532	13.8386	14.1352	14.445	21.2779	33.1124	21.9469	18.9198	21.4467	19.9204	16.0381	15.1607	16.0536	22.9285	24.0785	18.1524	23.6066	23.084	21.1173	21.18	7.3693	9.2275	7.574	8.8094	9.5294	9.7135	7.5681	9.054	7.8083	9.0878	8.0281	8.4255	8.1423	17.4714	7.0616	14.4701	14.274	7.3683	7.4135	8.3687	8.8078	7.1705
458	14.9034	13.6958	21.84	14.9402	14.9668	18.2673	14.3264	13.1941	13.7839	14.0671	14.4045	21.2048	33.0559	21.8668	18.881	21.3438	19.8483	15.9692	15.0932	16.0039	22.8815	24.0265	18.0761	23.552	23.0354	21.0731	21.0978	7.3578	9.1963	7.5663	8.8025	9.51	9.6902	7.5502	9.0458	7.7881	9.0627	7.9974	8.3899	8.125	17.5139	7.0422	14.4999	14.2297	7.3493	7.3868	8.3445	8.8096	7.1539
459	14.8847	13.6063	21.8577	14.9381	14.9256	18.2401	14.2746	13.1451	13.7449	14.012	14.3612	21.1066	32.9916	21.8047	18.8263	21.2358	19.7331	15.8662	15.0169	15.9292	22.8549	23.9926	18.0427	23.4844	22.9742	20.981	20.9793	7.3732	9.1813	7.5846	8.7742	9.5065	9.7093	7.5144	9.0458	7.8044	9.0523	7.9436	8.4051	8.0964	17.5566	7.0569	14.5093	14.206	7.3216	7.3716	8.3386	8.8125	7.1593
460	14.8568	13.5494	21.842	14.9017	14.8293	18.2328	14.2271	13.086	13.7016	13.9751	14.2806	20.9918	32.8818	21.7089	18.7329	21.1082	19.6394	15.7708	14.9159	15.8507	22.8093	23.9738	17.9504	23.386	22.8783	20.8281	20.8853	7.3806	9.2045	7.5758	8.7608	9.483	9.7132	7.5187	9.0749	7.8221	9.0233	7.919	8.4111	8.0519	17.5573	7.0381	14.5148	14.1953	7.2961	7.3609	8.3085	8.8183	7.1247
461	14.8153	13.5153	21.8302	14.8456	14.7892	18.1916	14.2021	13.0248	13.6543	13.9181	14.2328	20.9304	32.8739	21.6513	18.6758	21.0472	19.5801	15.7247	14.8842	15.8311	22.7994	23.9243	17.8918	23.3351	22.8124	20.7703	20.8408	7.3768	9.1939	7.5659	8.7431	9.4778	9.6901	7.506	9.0589	7.7967	9.0175	7.8879	8.4004	8.0344	17.585	7.0277	14.564	14.1923	7.2984	7.3457	8.2792	8.8142	7.0993
462	14.7655	13.476	21.7852	14.776	14.7257	18.1553	14.1259	12.9706	13.5977	13.8711	14.1487	20.8331	32.8427	21.5765	18.6046	20.9749	19.4829	15.6909	14.8643	15.765	22.7814	23.8874	17.7857	23.2898	22.7563	20.7073	20.7475	7.365	9.1978	7.5693	8.7204	9.4412	9.6467	7.509	9.0445	7.7693	9.0294	7.8847	8.3983	8.011	17.61	7.0137	14.6082	14.2003	7.2605	7.3441	8.2662	8.8591	7.0907
463	14.7559	13.4229	21.7898	14.7875	14.75	18.1283	14.0998	12.9628	13.5797	13.8312	14.1296	20.7289	32.8295	21.5078	18.5581	20.8942	19.4304	15.6603	14.8433	15.7119	22.7621	23.8532	17.6828	23.2334	22.7222	20.6268	20.6641	7.4095	9.2184	7.5703	8.7604	9.4494	9.6444	7.5228	9.0527	7.8078	9.0628	7.8836	8.4032	8.0437	17.6299	7.0065	14.6277	14.2301	7.243	7.3459	8.2587	8.8671	7.0898
464	14.7002	13.4116	21.7488	14.7963	14.6993	18.1056	14.0316	12.9269	13.541	13.8276	14.0813	20.6918	32.8587	21.4698	18.5329	20.7936	19.4147	15.6304	14.7821	15.6694	22.7652	23.8545	17.6324	23.1939	22.6786	20.5435	20.5994	7.4331	9.2358	7.5848	8.7654	9.4441	9.6229	7.5247	9.075	7.8089	9.0442	7.8835	8.4113	8.0896	17.6546	7.0247	14.6076	14.2236	7.2597	7.3524	8.2741	8.8747	7.0817
465	14.6825	13.382	21.7362	14.7552	14.6507	18.0484	13.9644	12.8989	13.4811	13.7687	14.0294	20.6115	32.8382	21.4082	18.5104	20.6577	19.3321	15.5691	14.6978	15.5965	22.7527	23.8419	17.6019	23.0817	22.5822	20.4788	20.5238	7.4317	9.243	7.5906	8.7563	9.4406	9.617	7.4995	9.1028	7.8192	8.9876	7.8638	8.4201	8.0676	17.6311	7.0073	14.5765	14.2046	7.2288	7.3309	8.2335	8.8569	7.0516
466	14.6283	13.3187	21.701	14.723	14.6042	17.987	13.8873	12.8127	13.4175	13.6745	13.9678	20.5554	32.7818	21.3302	18.4356	20.5563	19.2396	15.5034	14.6407	15.5085	22.7027	23.8012	17.5486	22.9957	22.5082	20.4022	20.4236	7.4122	9.2302	7.599	8.7306	9.4225	9.5942	7.4705	9.0712	7.8201	8.9672	7.8407	8.4074	8.0301	17.6127	6.9906	14.5335	14.1814	7.1897	7.3202	8.1605	8.8581	7.0319
467	14.557	13.2689	21.6477	14.6842	14.5304	17.9452	13.779	12.7383	13.3459	13.5856	13.9093	20.5384	32.79	21.3201	18.4528	20.546	19.2123	15.4932	14.5914	15.4494	22.676	23.8321	17.5493	22.9384	22.5067	20.3666	20.3501	7.3886	9.2302	7.5945	8.6909	9.3909	9.5704	7.4398	9.0281	7.8201	8.944	7.7969	8.4037	8.0402	17.643	6.9841	14.5586	14.1697	7.1921	7.3358	8.1379	8.9039	7.0295
468	14.5413	13.2288	21.6201	14.6319	14.4641	17.9429	13.7049	12.6863	13.3048	13.5316	13.8658	20.4839	32.807	21.317	18.4856	20.4861	19.1747	15.4201	14.5534	15.4106	22.6591	23.8367	17.4764	22.8196	22.524	20.3187	20.2967	7.3906	9.2482	7.6036	8.6782	9.3706	9.5658	7.4196	9.0556	7.8142	8.9434	7.7748	8.3788	8.0329	17.6779	6.9708	14.5634	14.1712	7.192	7.3297	8.1333	8.9323	6.9958
469	14.4807	13.1842	21.6062	14.6234	14.4217	17.928	13.6683	12.6366	13.2806	13.4654	13.7846	20.4351	32.7898	21.2696	18.47	20.4203	19.1218	15.3694	14.5053	15.3303	22.6458	23.8422	17.4085	22.6962	22.5169	20.224	20.2318	7.3913	9.2429	7.5974	8.6478	9.3664	9.544	7.3964	9.041	7.7854	8.9209	7.727	8.3332	8.0314	17.6957	6.9577	14.5593	14.1315	7.1698	7.2908	8.1241	8.9362	6.9339
470	14.4144	13.1334	21.5882	14.5773	14.4209	17.9113	13.6297	12.6139	13.2344	13.4223	13.7467	20.3928	32.7911	21.2323	18.4292	20.3775	19.0727	15.3494	14.4756	15.2803	22.6688	23.8752	17.3654	22.6594	22.528	20.1602	20.1701	7.4033	9.2172	7.6038	8.6377	9.3406	9.5124	7.3912	9.0209	7.7766	8.8895	7.697	8.3155	8.008	17.6973	6.9616	14.5917	14.1134	7.1545	7.2723	8.0871	8.9627	6.9192
471	14.362	13.093	21.5682	14.5219	14.3972	17.8544	13.5882	12.566	13.2167	13.404	13.7425	20.3078	32.7219	21.1636	18.3764	20.3002	18.9831	15.3015	14.41	15.2099	22.6121	23.8702	17.332	22.6184	22.5214	20.1277	20.0752	7.3868	9.2417	7.5891	8.6377	9.3082	9.5344	7.3827	9.039	7.7885	8.878	7.6926	8.2868	7.979	17.6976	6.9124	14.6064	14.0919	7.132	7.2554	8.0407	8.9558	6.9167
472	14.331	13.0586	21.5632	14.5022	14.348	17.8115	13.5687	12.5442	13.2231	13.3999	13.7246	20.2074	32.639	21.0495	18.3488	20.2488	18.8948	15.2515	14.3352	15.1152	22.5624	23.87	17.2911	22.5593	22.5019	20.0869	19.9751	7.3788	9.273	7.5871	8.6293	9.2969	9.5233	7.3663	9.0553	7.8141	8.8877	7.6764	8.2935	7.9681	17.7082	6.8721	14.5922	14.0514	7.098	7.2469	8.0112	8.9408	6.8986
473	14.3264	13.0255	21.5914	14.5049	14.3182	17.7843	13.5703	12.5327	13.21	13.4148	13.6942	20.1681	32.6762	20.9878	18.3643	20.2229	18.8608	15.2065	14.2919	15.0679	22.5766	23.866	17.2421	22.5145	22.5115	20.0355	19.9338	7.3819	9.2882	7.605	8.6185	9.279	9.4836	7.3663	9.0693	7.8254	8.9165	7.6631	8.3107	7.9706	17.7218	6.8782	14.5981	14.0239	7.077	7.2331	7.9993	8.9611	6.8732
474	14.2856	12.9666	21.5747	14.4275	14.2527	17.7822	13.5071	12.4682	13.1513	13.3799	13.6587	20.1638	32.6942	20.9863	18.391	20.1763	18.8524	15.1692	14.2536	15.0296	22.529	23.8671	17.1757	22.5056	22.5199	19.9766	19.9039	7.364	9.2804	7.5944	8.5827	9.2523	9.4476	7.3473	9.0766	7.841	8.8959	7.6432	8.2891	7.9917	17.7271	6.8845	14.6251	14.0267	7.0813	7.2278	7.9944	9.0026	6.8659
475	14.2513	12.9335	21.5212	14.3727	14.2296	17.7504	13.4625	12.4265	13.121	13.3745	13.625	20.1446	32.7089	20.9935	18.3949	20.1616	18.8352	15.147	14.2373	14.9948	22.5155	23.8856	17.1169	22.4646	22.5163	19.9626	19.8851	7.3571	9.2743	7.5945	8.5735	9.2324	9.4304	7.3272	9.0851	7.8348	8.8906	7.6566	8.2744	7.9905	17.749	6.881	14.6534	14.0346	7.0765	7.2126	7.9857	9.0369	6.8528
476	14.1607	12.8403	21.4712	14.2976	14.1364	17.67	13.4101	12.3707	13.0516	13.3191	13.5494	20.0501	32.6463	20.9882	18.3859	20.1115	18.7623	15.0424	14.186	14.9168	22.4689	23.896	17.0469	22.4083	22.5281	19.8904	19.8309	7.321	9.2467	7.5828	8.5272	9.1653	9.3737	7.2802	9.0752	7.7982	8.8416	7.5925	8.2276	7.9795	17.7486	6.8471	14.661	14.0474	7.0554	7.1871	7.9557	9.0593	6.8271
477	14.0535	12.7398	21.392	14.2218	14.0382	17.5806	13.367	12.3354	12.9804	13.2259	13.5095	19.9717	32.6441	20.966	18.3398	20.0182	18.7033	14.9645	14.1159	14.8707	22.4158	23.8508	16.9672	22.3624	22.5463	19.8214	19.749	7.2665	9.2271	7.5357	8.4801	9.1084	9.3024	7.2365	9.0535	7.7667	8.8177	7.5342	8.1901	7.9493	17.732	6.8326	14.6116	14.0195	7.0183	7.1666	7.9357	9.042	6.8063
478	13.9861	12.6827	21.3359	14.1752	13.9558	17.497	13.3077	12.3063	12.9117	13.1771	13.4734	19.9517	32.6551	20.936	18.3014	19.9447	18.6278	14.8965	14.0585	14.8112	22.3037	23.8035	16.8675	22.3092	22.5351	19.7813	19.6722	7.2266	9.2148	7.5049	8.4487	9.0797	9.2471	7.2157	9.0444	7.7669	8.793	7.5072	8.154	7.9322	17.7287	6.8141	14.5628	14.0038	6.9992	7.1354	7.9195	9.0224	6.7917
479	13.9176	12.6081	21.2721	14.1234	13.8893	17.4006	13.2529	12.2496	12.8442	13.1093	13.4162	19.8882	32.5728	20.8616	18.2479	19.8447	18.5478	14.8011	13.979	14.72	22.1991	23.6697	16.7668	22.2195	22.4642	19.6813	19.5879	7.1869	9.1579	7.4888	8.417	9.045	9.19	7.17	9.0142	7.7528	8.7524	7.5053	8.1376	7.9246	17.6971	6.7767	14.5097	13.9735	6.9922	7.0881	7.8796	9.0135	6.7459
480	13.8544	12.544	21.2381	14.0497	13.8229	17.3605	13.1685	12.1669	12.7829	13.0385	13.3495	19.7523	32.37	20.7369	18.1546	19.7018	18.3904	14.6463	13.8548	14.5882	22.0731	23.5015	16.6511	22.0801	22.3497	19.5422	19.4403	7.1807	9.1491	7.4802	8.3706	8.9756	9.1229	7.1287	8.9982	7.7282	8.6989	7.4486	8.1255	7.8726	17.5827	6.7225	14.4348	13.9343	6.9289	7.038	7.8058	8.9928	6.6759
481	13.7789	12.4929	21.18	14.0161	13.7417	17.3301	13.13	12.1246	12.7442	13.014	13.2985	19.6512	32.2578	20.6503	18.1053	19.5923	18.3304	14.5828	13.769	14.4864	21.9785	23.4294	16.5373	21.9691	22.2429	19.4633	19.3353	7.1638	9.1418	7.4676	8.3371	8.9453	9.0774	7.1024	8.9787	7.7072	8.6726	7.4095	8.0956	7.8431	17.5003	6.702	14.4199	13.939	6.8751	7.0136	7.761	8.9802	6.65
482	13.7252	12.4204	21.1181	13.9612	13.6332	17.2669	13.0753	12.1033	12.6796	12.9432	13.258	19.5864	32.2071	20.5924	18.0949	19.5187	18.2829	14.5286	13.7103	14.4351	21.9099	23.3906	16.4763	21.8554	22.1387	19.4038	19.2643	7.1218	9.1195	7.436	8.2722	8.9257	9.0577	7.0907	8.9449	7.7046	8.6488	7.3869	8.0692	7.8359	17.4878	6.6959	14.4552	13.966	6.8487	6.9932	7.7648	8.9966	6.624
483	13.6624	12.3509	21.0242	13.9009	13.5481	17.2031	12.987	12.0389	12.5931	12.8892	13.2012	19.4768	32.0569	20.4739	18.0146	19.4156	18.1692	14.4424	13.6186	14.3427	21.8479	23.3296	16.3988	21.7613	22.0216	19.315	19.1801	7.0854	9.0681	7.3896	8.1931	8.8707	9.0021	7.0551	8.9074	7.6723	8.6106	7.3465	8.0374	7.7994	17.468	6.6584	14.439	13.9598	6.8236	6.9384	7.7251	9.0302	6.5859
484	13.553	12.2825	20.9353	13.8426	13.4627	17.1114	12.9415	11.9666	12.5266	12.8367	13.1575	19.4297	31.9788	20.3939	17.9317	19.3352	18.0882	14.367	13.5445	14.2803	21.7966	23.2838	16.3608	21.7088	21.9995	19.2442	19.0955	7.0509	9.0195	7.3544	8.1496	8.802	8.933	6.9995	8.871	7.6434	8.5518	7.2743	7.998	7.7361	17.444	6.6011	14.4187	13.9325	6.7907	6.9021	7.6612	9.076	6.5434
485	13.4539	12.2008	20.8686	13.7467	13.3863	17.0311	12.9096	11.915	12.4936	12.7793	13.0905	19.4537	31.9961	20.3677	17.9333	19.3123	18.0664	14.2936	13.5313	14.2639	21.7539	23.268	16.3257	21.6662	22.0186	19.2276	19.0768	7.0163	8.9986	7.3286	8.0839	8.7354	8.8727	6.9729	8.8471	7.6129	8.5152	7.2349	7.9603	7.6935	17.4529	6.5895	14.463	13.9054	6.7731	6.8783	7.6374	9.1159	6.5146
486	13.4144	12.1269	20.7904	13.679	13.3081	17.0035	12.8404	11.8622	12.4368	12.7084	13.0269	19.446	31.9988	20.3293	17.9497	19.264	18.0549	14.2196	13.4741	14.2171	21.7125	23.2361	16.275	21.661	21.9737	19.1906	19.0132	6.9809	8.9686	7.288	8.0413	8.6824	8.794	6.9413	8.8581	7.5978	8.4847	7.2239	7.951	7.6973	17.4522	6.5782	14.4993	13.8971	6.7325	6.845	7.6223	9.1293	6.5004
487	13.367	12.0868	20.6967	13.6412	13.2498	16.9593	12.7837	11.7994	12.3604	12.6249	12.9641	19.3709	31.9533	20.2693	17.9521	19.1938	18.0413	14.1768	13.4313	14.138	21.6286	23.1668	16.2104	21.6178	21.9394	19.1026	18.9257	6.9397	8.9363	7.2616	7.9944	8.6249	8.7166	6.9107	8.8333	7.5771	8.4618	7.1953	7.9259	7.6849	17.4624	6.5542	14.4934	13.9053	6.7034	6.8418	7.6057	9.102	6.4905
488	13.3275	12.0404	20.6236	13.637	13.2094	16.92	12.7724	11.7915	12.3279	12.5815	12.9559	19.2877	31.8393	20.2053	17.8993	19.1172	17.9628	14.1173	13.3723	14.0875	21.5419	23.11	16.1566	21.5253	21.874	19.0066	18.8144	6.9278	8.8943	7.2692	7.9902	8.613	8.6919	6.908	8.821	7.5774	8.4401	7.1662	7.9275	7.6583	17.4365	6.5238	14.4688	13.8774	6.6768	6.8217	7.5942	9.0864	6.4776
489	13.2847	11.9801	20.4954	13.6097	13.1425	16.849	12.7161	11.7607	12.2638	12.5133	12.8987	19.2193	31.7476	20.1013	17.7943	19.0608	17.8334	14.0205	13.3086	14.0125	21.4363	22.9733	16.0914	21.4607	21.8131	18.8867	18.7249	6.9226	8.8346	7.2711	7.95	8.5719	8.6631	6.882	8.7958	7.5365	8.4144	7.1311	7.901	7.6271	17.475	6.5126	14.4724	13.8377	6.6548	6.7801	7.5719	9.0507	6.4386
490	13.1885	11.9117	20.3991	13.5091	13.0754	16.7407	12.6109	11.6833	12.166	12.4161	12.7916	19.0784	31.6091	19.9599	17.6709	18.9166	17.6656	13.9236	13.21	13.9236	21.28	22.8192	15.9726	21.3416	21.6614	18.7605	18.5736	6.8751	8.7655	7.223	7.8682	8.4969	8.5964	6.8115	8.7486	7.5339	8.3556	7.0633	7.8522	7.5656	17.4307	6.4593	14.4687	13.7768	6.6055	6.7069	7.4884	8.9881	6.3721
491	13.0744	11.8217	20.2681	13.4126	12.9785	16.6205	12.484	11.583	12.0717	12.3224	12.6914	18.9157	31.4269	19.8345	17.5128	18.8025	17.5447	13.8285	13.0915	13.8018	21.1498	22.6229	15.8567	21.1986	21.5128	18.6126	18.4498	6.8	8.6976	7.1787	7.7888	8.414	8.4984	6.7468	8.7068	7.4995	8.2854	6.9937	7.7856	7.5195	17.3952	6.4115	14.4304	13.7401	6.576	6.6416	7.4204	8.9534	6.3479
492	13.0097	11.7475	20.1851	13.3637	12.8573	16.502	12.4013	11.4972	11.9947	12.2219	12.626	18.7941	31.2304	19.7055	17.3871	18.6851	17.4475	13.7005	12.9553	13.7187	21.01	22.4128	15.7457	21.0951	21.4258	18.4564	18.3622	6.7656	8.6492	7.1272	7.7163	8.3513	8.4275	6.6968	8.6629	7.4298	8.2253	6.9244	7.7292	7.4973	17.3767	6.3749	14.4069	13.6928	6.5327	6.617	7.397	8.9203	6.3201
493	12.9728	11.7107	20.189	13.3274	12.8315	16.4588	12.3585	11.4725	11.966	12.1924	12.5914	18.7215	31.1093	19.6244	17.3109	18.5909	17.3687	13.6019	12.8894	13.6408	20.9274	22.3003	15.6891	21.026	21.369	18.3615	18.2506	6.8005	8.6529	7.1218	7.68	8.3255	8.3592	6.6843	8.6539	7.4161	8.2221	6.9349	7.7267	7.4816	17.4171	6.3493	14.4305	13.6664	6.4838	6.6121	7.3684	8.8937	6.2854
494	12.9597	11.686	20.1914	13.3267	12.8388	16.4337	12.3712	11.4724	11.9572	12.2077	12.552	18.6804	31.0677	19.5837	17.2703	18.5432	17.2947	13.566	12.839	13.6095	20.8923	22.2821	15.6676	20.9616	21.3771	18.2982	18.1893	6.8081	8.6646	7.1336	7.6784	8.3215	8.3389	6.6879	8.6839	7.4414	8.2269	6.9601	7.7405	7.4667	17.4485	6.3465	14.4444	13.6293	6.4506	6.5893	7.3412	8.882	6.2602
495	12.8841	11.6178	20.1001	13.2712	12.7515	16.3551	12.3126	11.4011	11.8968	12.1761	12.4965	18.598	31.0134	19.5066	17.1749	18.4616	17.2086	13.5251	12.7649	13.5865	20.7991	22.1642	15.6114	20.8484	21.3892	18.2366	18.1586	6.7675	8.6373	7.1087	7.6426	8.2656	8.2807	6.6463	8.6676	7.4314	8.1994	6.9121	7.702	7.4481	17.4088	6.3287	14.4141	13.5717	6.4211	6.5496	7.2925	8.8741	6.2463
496	12.7901	11.526	19.9872	13.1652	12.651	16.2278	12.2201	11.2988	11.7786	12.1099	12.4061	18.5365	30.9877	19.409	17.0565	18.3781	17.143	13.4368	12.7166	13.5258	20.6832	22.0275	15.5275	20.7292	21.3334	18.163	18.112	6.6928	8.5597	7.0502	7.5537	8.1759	8.2195	6.5751	8.6018	7.3838	8.1358	6.8579	7.6222	7.4237	17.3306	6.3112	14.4053	13.5371	6.421	6.4985	7.2618	8.8996	6.2251
497	12.7447	11.4795	19.9588	13.101	12.5746	16.1496	12.1459	11.2477	11.7129	12.079	12.3437	18.4474	30.9134	19.3014	16.9459	18.2614	17.0611	13.3556	12.629	13.411	20.5917	21.8883	15.4411	20.6463	21.243	18.0681	18.05	6.674	8.506	7.0089	7.5185	8.1338	8.1813	6.5498	8.5809	7.3794	8.1105	6.8136	7.598	7.3756	17.2523	6.2861	14.3842	13.4489	6.4063	6.4702	7.2229	8.9055	6.1729
498	12.6766	11.4321	19.9125	13.0456	12.5263	16.0546	12.0773	11.2173	11.6628	11.9895	12.2716	18.3587	30.8298	19.2302	16.8358	18.1552	16.9769	13.2883	12.5502	13.3428	20.5175	21.7786	15.3952	20.5689	21.157	17.9814	17.9849	6.6351	8.4693	6.96	7.5042	8.0915	8.1169	6.5288	8.5445	7.3543	8.0665	6.7957	7.5626	7.3155	17.184	6.2581	14.3568	13.4079	6.3901	6.4508	7.1721	8.8714	6.1376
499	12.5888	11.3399	19.8002	12.9779	12.4593	15.9221	11.9872	11.1128	11.5659	11.8716	12.1611	18.2366	30.7314	19.1193	16.6863	18.0366	16.8391	13.1944	12.4424	13.2431	20.4198	21.6177	15.3078	20.4688	21.0383	17.8666	17.8458	6.5742	8.4213	6.898	7.4244	8.0292	8.0336	6.4573	8.4813	7.322	7.9926	6.7355	7.4792	7.2558	17.1098	6.1917	14.2745	13.369	6.3171	6.3838	7.0983	8.7977	6.0743
500	12.5386	11.2822	19.718	12.8931	12.3887	15.8224	11.9319	11.0307	11.4791	11.8085	12.1083	18.1353	30.6265	19.0003	16.5676	17.9087	16.7612	13.0914	12.336	13.1404	20.3081	21.4602	15.1948	20.3461	20.9222	17.7879	17.7319	6.5276	8.3661	6.8455	7.3718	7.9701	7.9869	6.4051	8.4341	7.2761	7.9547	6.6818	7.4346	7.1934	17.0728	6.1405	14.2036	13.3234	6.2454	6.3278	7.0538	8.7495	6.016
501	12.4546	11.195	19.6699	12.7704	12.2972	15.7415	11.8518	10.9873	11.4329	11.7355	12.0487	18.0308	30.545	18.9209	16.4717	17.8105	16.6877	12.9802	12.244	13.077	20.2235	21.3184	15.0671	20.2104	20.7855	17.7	17.6245	6.4946	8.3304	6.8222	7.3015	7.9257	7.9216	6.3574	8.3881	7.2049	7.9143	6.633	7.3979	7.1343	17.0542	6.0817	14.1298	13.2752	6.188	6.2517	6.9994	8.7082	5.9795
502	12.3411	11.1544	19.5805	12.712	12.2064	15.6713	11.7504	10.9223	11.3759	11.6487	11.9823	17.9955	30.4981	18.8681	16.3567	17.744	16.6685	12.9017	12.1707	13.0332	20.1514	21.2144	14.9943	20.1279	20.691	17.6329	17.5419	6.4308	8.2629	6.8037	7.2124	7.859	7.8227	6.2839	8.3247	7.1503	7.8541	6.5655	7.3576	7.1148	16.9982	6.0585	14.0944	13.2698	6.1631	6.2102	6.9485	8.7262	5.9484
503	12.2525	11.0718	19.5383	12.6646	12.1488	15.5927	11.6869	10.8268	11.2983	11.5628	11.8955	17.8604	30.3966	18.7442	16.2203	17.6438	16.5618	12.8221	12.1091	12.9435	20.0693	21.0914	14.9157	20.0094	20.5616	17.5143	17.4204	6.3926	8.1832	6.7323	7.1645	7.8054	7.7341	6.2355	8.2405	7.1418	7.7873	6.5123	7.3121	7.0717	16.9315	6.0252	14.0297	13.2174	6.1373	6.1606	6.8864	8.695	5.8934
504	12.2084	11.0028	19.4749	12.5965	12.0964	15.5161	11.6226	10.7816	11.2489	11.5086	11.8372	17.7376	30.2841	18.636	16.1318	17.5649	16.4406	12.7501	11.9958	12.8333	19.9909	20.9725	14.8169	19.8711	20.4198	17.4249	17.3178	6.3654	8.1064	6.6977	7.1392	7.7843	7.6933	6.2262	8.2096	7.1245	7.756	6.5058	7.2929	7.0168	16.8751	5.957	13.9969	13.1592	6.0957	6.1004	6.8065	8.637	5.833
505	12.1316	10.9684	19.4066	12.507	12.036	15.4134	11.5588	10.738	11.1828	11.4295	11.7394	17.6568	30.1293	18.5266	16.0198	17.4476	16.3207	12.6762	11.8659	12.7181	19.9311	20.8306	14.711	19.7335	20.2778	17.3135	17.2154	6.3306	8.0518	6.6792	7.0844	7.7225	7.6598	6.191	8.1935	7.0842	7.7172	6.4927	7.2347	6.9549	16.7821	5.9108	13.9487	13.1085	6.0436	6.0427	6.7594	8.5774	5.788
506	12.0882	10.9317	19.3708	12.4637	11.9941	15.3871	11.5531	10.7293	11.157	11.4233	11.7175	17.5779	30.0332	18.4311	15.9086	17.3524	16.2408	12.6158	11.8041	12.6713	19.837	20.7202	14.644	19.6435	20.1544	17.2176	17.1445	6.3302	8.0404	6.6773	7.054	7.6868	7.6167	6.1683	8.1944	7.0765	7.6865	6.4716	7.2252	6.9403	16.7732	5.8916	13.9202	13.0475	5.9904	6.012	6.7479	8.5076	5.7684
507	12.0219	10.8505	19.3541	12.4232	11.9486	15.3154	11.519	10.6814	11.1301	11.379	11.6848	17.5018	30.0122	18.3286	15.8238	17.2984	16.2008	12.5619	11.7807	12.6137	19.7491	20.613	14.6119	19.534	19.9991	17.1523	17.0925	6.2974	8.0341	6.664	6.9971	7.6585	7.5577	6.1369	8.1822	7.0632	7.6704	6.4613	7.2159	6.9188	16.7641	5.8838	13.8549	13.0244	5.9451	6.01	6.7191	8.4362	5.7663
508	11.9455	10.8092	19.2987	12.3616	11.8844	15.2298	11.4442	10.6205	11.0587	11.3346	11.6246	17.4108	29.9282	18.2236	15.7461	17.2326	16.18	12.5195	11.7186	12.5389	19.6556	20.538	14.5512	19.4192	19.8723	17.0733	17.0189	6.2746	8.0026	6.6528	6.9548	7.6243	7.5182	6.127	8.133	7.0351	7.638	6.4185	7.1767	6.8939	16.6577	5.8583	13.7907	12.9674	5.9278	5.9958	6.6851	8.4072	5.7466
509	11.8574	10.7505	19.1798	12.2491	11.7842	15.1395	11.373	10.5673	10.9707	11.3009	11.5554	17.3671	29.829	18.1557	15.6756	17.136	16.1391	12.47	11.6182	12.4685	19.5455	20.4611	14.4816	19.3184	19.7731	16.9752	16.9094	6.2728	7.9539	6.5949	6.9184	7.5769	7.4577	6.1	8.0615	6.9779	7.5933	6.3966	7.1235	6.8772	16.5721	5.8481	13.7483	12.9196	5.8822	5.9647	6.6579	8.3996	5.7311
510	11.7981	10.7279	19.1082	12.174	11.7538	15.087	11.3078	10.5122	10.9164	11.2672	11.5162	17.3228	29.6934	18.0912	15.5735	17.0479	16.0832	12.3768	11.5037	12.4213	19.4649	20.3977	14.4079	19.2227	19.6567	16.8806	16.8174	6.2642	7.9372	6.5787	6.879	7.53	7.3949	6.0997	8.021	6.9515	7.5345	6.3703	7.1011	6.8619	16.5105	5.8186	13.7625	12.8965	5.8584	5.9532	6.6235	8.3945	5.7102
511	11.7706	10.6884	19.0729	12.1415	11.6842	15.0641	11.2551	10.4585	10.8961	11.187	11.4533	17.2905	29.6613	18.0645	15.5211	17.0192	16.0368	12.3116	11.4535	12.3793	19.405	20.3612	14.359	19.1614	19.5782	16.8194	16.7608	6.2194	7.8972	6.5526	6.837	7.4733	7.3704	6.0636	7.9727	6.9408	7.4873	6.3332	7.0761	6.837	16.4881	5.7991	13.7673	12.8655	5.849	5.9244	6.6029	8.3789	5.6882
512	11.7196	10.6563	19.0467	12.099	11.6171	15.0292	11.2101	10.4217	10.8684	11.1258	11.415	17.2625	29.653	18.0271	15.4532	16.9976	16.0096	12.2814	11.426	12.3405	19.367	20.3512	14.3182	19.0932	19.5203	16.7757	16.7091	6.1947	7.8623	6.5403	6.8052	7.4415	7.3441	6.0465	7.9596	6.9062	7.4667	6.295	7.0435	6.8103	16.483	5.7939	13.7543	12.8635	5.8416	5.9019	6.5856	8.3455	5.6844
513	11.6409	10.6031	19.0074	12.0367	11.561	14.9744	11.1778	10.3817	10.8183	11.0938	11.3773	17.2209	29.6214	17.9765	15.403	16.9515	15.9469	12.2524	11.38	12.3211	19.321	20.3369	14.2703	18.9893	19.469	16.7489	16.6782	6.161	7.8409	6.5077	6.807	7.4011	7.3044	6.0177	7.9256	6.8733	7.446	6.2524	7.0018	6.793	16.4835	5.7738	13.7063	12.8839	5.8206	5.8695	6.5405	8.3213	5.6493
514	11.5783	10.5355	18.9531	11.9693	11.5002	14.9235	11.1121	10.3334	10.739	11.0621	11.3161	17.1423	29.5635	17.9036	15.3702	16.8917	15.8841	12.1875	11.3005	12.2676	19.2365	20.2612	14.2155	18.8792	19.4082	16.6934	16.6261	6.1573	7.8119	6.4744	6.7564	7.3381	7.2473	6.0126	7.9029	6.8387	7.4063	6.2523	6.9784	6.7595	16.502	5.7313	13.6892	12.9103	5.7997	5.8479	6.5101	8.3275	5.651
515	11.5379	10.4722	18.8885	11.8827	11.4676	14.8609	11.046	10.3016	10.6845	11.0144	11.2599	17.0939	29.4649	17.8259	15.3359	16.8386	15.8373	12.1254	11.2112	12.187	19.1195	20.1752	14.1431	18.7772	19.3486	16.6146	16.572	6.1341	7.7745	6.4467	6.7085	7.3156	7.2017	5.9817	7.8895	6.8173	7.3572	6.2455	6.9419	6.7346	16.525	5.7003	13.7162	12.9202	5.7526	5.8221	6.4917	8.2996	5.634
516	11.4865	10.4316	18.8296	11.8139	11.4221	14.7936	10.9957	10.2781	10.6544	10.9527	11.2192	17.04	29.3606	17.7471	15.28	16.7438	15.7791	12.0952	11.154	12.1525	18.9871	20.0762	14.0612	18.6925	19.2713	16.5432	16.4972	6.11	7.7539	6.4306	6.6934	7.2883	7.1772	5.9649	7.8816	6.8082	7.3364	6.2129	6.9097	6.7233	16.4959	5.6862	13.702	12.9033	5.7304	5.8035	6.4719	8.2611	5.6296
517	11.4378	10.3694	18.7822	11.7502	11.3677	14.7517	10.9708	10.2388	10.6263	10.8967	11.1733	16.9935	29.2433	17.7064	15.255	16.6675	15.7397	12.0748	11.1143	12.1104	18.8915	19.9902	14.0099	18.6272	19.2193	16.4983	16.4256	6.0881	7.7463	6.4357	6.6666	7.2704	7.1619	5.9392	7.8817	6.8229	7.3151	6.1965	6.8896	6.7238	16.5033	5.6863	13.7017	12.8592	5.7387	5.7953	6.4461	8.2446	5.6143
518	11.3969	10.3637	18.7448	11.689	11.339	14.7721	10.9539	10.199	10.6049	10.8952	11.1606	16.9258	29.1651	17.6634	15.1977	16.6237	15.6742	12.0399	11.0896	12.0532	18.8056	19.9115	13.9764	18.545	19.1777	16.4353	16.3391	6.0775	7.7559	6.451	6.6437	7.2403	7.16	5.923	7.8959	6.8172	7.3224	6.1878	6.8872	6.7108	16.5319	5.6719	13.6956	12.8494	5.732	5.7679	6.4419	8.2239	5.5861
519	11.3372	10.3188	18.7059	11.6151	11.2811	14.7578	10.9295	10.1756	10.5536	10.8609	11.1451	16.8095	29.0525	17.5437	15.0893	16.5214	15.5606	11.9329	10.9869	11.9591	18.6648	19.7976	13.8949	18.3872	19.0924	16.3364	16.2513	6.0578	7.7174	6.4264	6.6022	7.1915	7.1239	5.9124	7.8762	6.8006	7.3122	6.1692	6.87	6.6634	16.5207	5.623	13.6319	12.8117	5.6718	5.7023	6.3952	8.1736	5.5277
520	11.2714	10.2519	18.6239	11.5406	11.1978	14.6854	10.8758	10.1144	10.4783	10.7813	11.0591	16.73	28.9524	17.4388	14.9702	16.4178	15.4779	11.8486	10.8994	11.8779	18.5581	19.6619	13.7883	18.2941	18.9895	16.2733	16.1926	6.0133	7.6788	6.3755	6.5557	7.1277	7.0288	5.8698	7.8558	6.7572	7.2581	6.109	6.8411	6.6143	16.4757	5.5883	13.5404	12.7522	5.6279	5.6507	6.3527	8.1454	5.4881
521	11.2226	10.1877	18.5569	11.4676	11.1408	14.6467	10.8375	10.0928	10.4551	10.7461	10.9994	16.7013	28.8627	17.3946	14.925	16.3807	15.4442	11.8015	10.8893	11.8331	18.4707	19.5685	13.7411	18.2461	18.9521	16.2014	16.146	5.9831	7.6503	6.362	6.5337	7.0834	6.9985	5.858	7.8787	6.7667	7.2065	6.0899	6.8261	6.6209	16.465	5.5722	13.4946	12.7535	5.6092	5.6328	6.3523	8.141	5.4726
522	11.1462	10.0988	18.4589	11.3717	11.0813	14.5722	10.7958	10.0338	10.4039	10.7144	10.9616	16.6465	28.7546	17.3519	14.8918	16.3339	15.4181	11.7536	10.85	11.7996	18.3821	19.5097	13.6801	18.1998	18.9378	16.1085	16.0882	5.9733	7.6412	6.3411	6.5025	7.0499	6.9661	5.8333	7.8688	6.7485	7.1443	6.0679	6.776	6.6234	16.4709	5.5517	13.493	12.7555	5.5775	5.6268	6.3236	8.147	5.475
523	11.0899	10.0464	18.3828	11.3073	11.0384	14.5025	10.7797	9.9795	10.3381	10.6506	10.9329	16.583	28.6371	17.2592	14.8771	16.2506	15.3598	11.7034	10.7893	11.7541	18.282	19.4099	13.6177	18.1223	18.9625	16.024	16.0065	5.9542	7.6437	6.3214	6.4678	7.0273	6.9216	5.8194	7.8522	6.7283	7.1322	6.0563	6.7615	6.6003	16.4764	5.515	13.4844	12.7188	5.5549	5.6098	6.2825	8.1401	5.4803
524	11.0422	10.0153	18.3534	11.2328	10.977	14.4795	10.7495	9.9304	10.266	10.6068	10.8813	16.5285	28.4889	17.2038	14.8256	16.1987	15.2948	11.6289	10.7335	11.7087	18.1854	19.2953	13.5684	18.038	18.9455	15.9606	15.9552	5.9311	7.6485	6.3301	6.4441	6.9925	6.8779	5.797	7.845	6.7347	7.1165	6.0622	6.7577	6.5865	16.4868	5.5057	13.4888	12.6722	5.5317	5.6069	6.2337	8.1285	5.4819
525	11.0142	9.9839	18.3227	11.1732	10.9351	14.4478	10.7192	9.9128	10.2515	10.5916	10.8445	16.5065	28.4241	17.1311	14.7952	16.1289	15.275	11.5981	10.6902	11.6522	18.117	19.1927	13.5164	17.9942	18.8998	15.9154	15.9118	5.9203	7.6239	6.325	6.4232	6.9798	6.8679	5.7804	7.827	6.7365	7.1071	6.0536	6.753	6.5787	16.4986	5.5152	13.4832	12.671	5.529	5.6096	6.2387	8.1264	5.4734
526	10.9574	9.9283	18.2443	11.0999	10.8583	14.418	10.6827	9.8821	10.2446	10.5576	10.7966	16.4957	28.3346	17.0558	14.7839	16.0578	15.2189	11.5406	10.6479	11.5782	18.0011	19.1088	13.4367	17.9291	18.8239	15.8254	15.8591	5.9064	7.5875	6.298	6.3755	6.9451	6.8531	5.7671	7.8408	6.7429	7.0837	6.0348	6.7692	6.5493	16.5323	5.4786	13.4573	12.6577	5.5351	5.6046	6.2289	8.1253	5.4625
527	10.9385	9.9091	18.1823	11.0439	10.8274	14.3565	10.6628	9.8577	10.2293	10.5545	10.7745	16.4174	28.2933	17.005	14.8083	16.0366	15.1727	11.5195	10.6325	11.5518	17.9352	19.0707	13.4022	17.8715	18.7795	15.7784	15.8074	5.9127	7.6034	6.276	6.3591	6.9037	6.8102	5.7723	7.8707	6.7453	7.0884	6.0311	6.756	6.5683	16.5301	5.464	13.4331	12.6878	5.5467	5.6115	6.2354	8.1464	5.4673
528	10.9437	9.9075	18.1556	11.0002	10.8359	14.3333	10.6479	9.8768	10.2201	10.5478	10.7753	16.3457	28.2123	16.9445	14.8064	15.9979	15.1206	11.4959	10.6335	11.5295	17.8885	19.0156	13.3715	17.8196	18.7725	15.7509	15.7538	5.9323	7.6286	6.2918	6.3782	6.9083	6.7975	5.7888	7.9047	6.7678	7.0967	6.0568	6.7522	6.5724	16.5249	5.4926	13.4534	12.6787	5.5506	5.6145	6.247	8.1571	5.4882
529	10.9257	9.8863	18.1492	10.9634	10.8404	14.3561	10.6603	9.8821	10.245	10.5389	10.7828	16.2941	28.1195	16.8886	14.7663	15.9182	15.0546	11.4397	10.6103	11.5049	17.8499	18.9378	13.3176	17.7725	18.751	15.6976	15.6804	5.9488	7.6287	6.2781	6.385	6.9181	6.8131	5.7987	7.9558	6.7831	7.1037	6.0762	6.789	6.56	16.5229	5.4653	13.4489	12.6776	5.521	5.6159	6.258	8.1842	5.4781
530	10.8618	9.8525	18.1407	10.8899	10.8072	14.3013	10.6334	9.8621	10.2062	10.5104	10.7782	16.2594	28.0417	16.8484	14.7354	15.8364	14.9803	11.388	10.5596	11.448	17.7625	18.8468	13.2544	17.7132	18.6912	15.6544	15.6006	5.9499	7.62	6.281	6.352	6.8995	6.8072	5.7906	7.9782	6.7837	7.0725	6.0692	6.7966	6.547	16.5437	5.4413	13.4222	12.7165	5.5291	5.5869	6.2679	8.1988	5.4533
531	10.7967	9.8045	18.0752	10.8146	10.7512	14.2053	10.5957	9.8166	10.1509	10.4686	10.6957	16.2228	27.9965	16.8014	14.7294	15.7914	14.932	11.3622	10.5446	11.4053	17.7069	18.8013	13.2122	17.6728	18.6873	15.6296	15.5167	5.9278	7.5864	6.2758	6.3134	6.8275	6.769	5.7448	7.9409	6.7696	7.0301	6.056	6.7586	6.5648	16.5702	5.4422	13.4262	12.724	5.5541	5.5795	6.2519	8.1979	5.4488
532	10.7526	9.7862	18.0485	10.7554	10.7175	14.1579	10.5479	9.7755	10.1323	10.4053	10.671	16.1909	27.889	16.7426	14.6929	15.7351	14.8908	11.3282	10.5127	11.3719	17.6966	18.7711	13.159	17.625	18.6882	15.6086	15.4726	5.9357	7.5758	6.2482	6.2981	6.8135	6.7608	5.7171	7.9348	6.7853	7.0323	6.0475	6.7873	6.5809	16.5497	5.4581	13.3983	12.7289	5.5411	5.5766	6.2346	8.214	5.4509
533	10.7866	9.7773	18.0582	10.7423	10.6986	14.1494	10.557	9.7949	10.1373	10.426	10.7096	16.1352	27.8252	16.692	14.6818	15.7111	14.8648	11.3135	10.4895	11.3408	17.6972	18.6998	13.1076	17.59	18.703	15.6083	15.4282	5.9676	7.6291	6.2702	6.3369	6.8518	6.7865	5.7583	8.006	6.8581	7.0677	6.0873	6.8502	6.5909	16.5387	5.4664	13.4208	12.7433	5.5597	5.601	6.2297	8.2222	5.4787
534	10.7696	9.7541	18.0563	10.7329	10.6576	14.131	10.5568	9.7882	10.1106	10.4076	10.6928	16.1347	27.7743	16.6399	14.6882	15.6935	14.8291	11.2681	10.4645	11.3009	17.6798	18.6639	13.0796	17.5451	18.7179	15.5663	15.3892	5.9709	7.6296	6.2913	6.3288	6.8502	6.785	5.7739	8.015	6.8721	7.0419	6.0768	6.8337	6.5964	16.541	5.4861	13.446	12.742	5.591	5.6023	6.2331	8.2421	5.4863
535	10.7238	9.753	18.0434	10.7137	10.6231	14.0814	10.5424	9.7519	10.0891	10.3745	10.6728	16.1232	27.7029	16.5793	14.6513	15.6613	14.7575	11.2116	10.4448	11.2668	17.6361	18.661	13.0477	17.4892	18.6868	15.5393	15.3527	5.979	7.6263	6.325	6.3204	6.8346	6.7826	5.7999	7.9943	6.8863	7.0162	6.0755	6.833	6.5933	16.5561	5.4939	13.4663	12.7178	5.5743	5.6108	6.2291	8.1951	5.5103
536	10.6843	9.7282	18.002	10.6797	10.6197	14.0231	10.5329	9.7603	10.0812	10.3779	10.659	16.1016	27.6424	16.5643	14.6169	15.6606	14.7018	11.1839	10.4398	11.2435	17.5954	18.6266	13.0371	17.4988	18.676	15.542	15.3129	5.9884	7.6263	6.289	6.3191	6.8321	6.7751	5.8115	8.0097	6.9383	7.0229	6.0835	6.8402	6.5974	16.5785	5.4986	13.5014	12.7001	5.5668	5.6157	6.255	8.1357	5.5219
537	10.6973	9.7301	18.0154	10.6752	10.6318	13.9871	10.5435	9.7616	10.0853	10.3562	10.6803	16.0598	27.5743	16.5361	14.5803	15.6356	14.6783	11.1669	10.4446	11.2403	17.571	18.571	13.0093	17.5053	18.6752	15.5299	15.2748	6.0035	7.6666	6.2948	6.3363	6.8251	6.786	5.8155	8.0255	6.9812	7.0142	6.0971	6.8417	6.5869	16.5792	5.4975	13.5287	12.6825	5.573	5.6042	6.2602	8.1397	5.5227
538	10.6825	9.6984	18.0079	10.6276	10.575	13.9345	10.5362	9.7338	10.0777	10.3275	10.6754	16.0078	27.5216	16.5032	14.5758	15.6331	14.677	11.1621	10.4465	11.2641	17.6231	18.5784	12.9964	17.485	18.6744	15.4733	15.2546	6.0272	7.6816	6.2794	6.3479	6.7926	6.7808	5.7787	8.0254	6.9955	6.9942	6.0822	6.8427	6.6149	16.59	5.5183	13.5742	12.6805	5.5919	5.6082	6.2563	8.1804	5.5062
539	10.6474	9.6482	17.9905	10.5666	10.4986	13.8785	10.5182	9.6714	10.0493	10.2921	10.607	15.9803	27.4789	16.4541	14.5416	15.5951	14.651	11.1521	10.4379	11.2616	17.6503	18.5337	12.9644	17.4555	18.6297	15.3939	15.2336	6.006	7.6485	6.2565	6.31	6.7541	6.7505	5.7542	8.0357	6.9817	6.9822	6.07	6.8234	6.6338	16.5288	5.5204	13.5715	12.6958	5.6102	5.6115	6.2414	8.2063	5.5015
540	10.6199	9.6219	17.932	10.537	10.4456	13.846	10.4959	9.6443	10.0307	10.2426	10.5902	15.9147	27.3812	16.3835	14.5068	15.5152	14.5889	11.1071	10.3826	11.1943	17.6622	18.4493	12.896	17.3931	18.5354	15.314	15.1507	6.0165	7.6031	6.2774	6.2994	6.747	6.7664	5.7686	8.0151	6.9794	6.9645	6.0417	6.8265	6.6101	16.456	5.4995	13.5555	12.7008	5.5986	5.5946	6.2018	8.1885	5.4652
541	10.5894	9.6299	17.9014	10.502	10.436	13.8355	10.497	9.6336	10.0471	10.2366	10.6098	15.8911	27.2718	16.3601	14.4827	15.435	14.5555	11.0647	10.357	11.1669	17.6572	18.3886	12.8458	17.3413	18.4678	15.274	15.071	6.0432	7.642	6.2911	6.3003	6.7702	6.7843	5.8014	8.0394	7.029	6.9721	6.0605	6.8345	6.5971	16.3976	5.4937	13.5599	12.7262	5.5888	5.6026	6.2161	8.1869	5.4743
542	10.5699	9.6224	17.8978	10.4724	10.4292	13.8352	10.4794	9.6199	10.0231	10.2292	10.5873	15.8367	27.1801	16.3698	14.4683	15.36	14.5035	11.0405	10.3399	11.1305	17.6669	18.3298	12.774	17.3032	18.4434	15.2355	15.0083	6.0553	7.6668	6.2897	6.2769	6.772	6.7819	5.8005	8.0613	7.064	6.9857	6.076	6.8332	6.5895	16.3672	5.5031	13.5568	12.7399	5.6045	5.6059	6.2283	8.2346	5.4897
543	10.5668	9.616	17.9047	10.473	10.4424	13.8083	10.4808	9.6129	10.0128	10.2184	10.5986	15.7763	27.1196	16.3016	14.4844	15.3143	14.4571	11.0125	10.3075	11.0923	17.6743	18.2768	12.7302	17.323	18.4561	15.1781	14.9902	6.0654	7.658	6.3103	6.2924	6.7659	6.7604	5.8076	8.1108	7.1225	6.9952	6.0933	6.8474	6.5752	16.3551	5.4902	13.5297	12.7183	5.6207	5.601	6.2244	8.2648	5.4861
544	10.5254	9.5981	17.8887	10.4672	10.4142	13.7372	10.4503	9.6013	9.9813	10.1735	10.5966	15.719	27.1128	16.249	14.498	15.2794	14.4151	10.9761	10.2778	11.0801	17.7141	18.2673	12.7093	17.3218	18.4834	15.1183	14.9783	6.0441	7.6425	6.3134	6.2919	6.7608	6.7411	5.8311	8.1249	7.1461	7.0003	6.0878	6.815	6.5833	16.3438	5.4959	13.486	12.7423	5.6306	5.6	6.2362	8.2499	5.5102
545	10.5522	9.6211	17.9074	10.4715	10.402	13.7253	10.4721	9.6462	9.9957	10.2011	10.6236	15.702	27.1396	16.2817	14.5356	15.2352	14.4449	11.0097	10.2877	11.0708	17.7684	18.2538	12.7064	17.3089	18.5128	15.1037	14.9856	6.0691	7.7021	6.325	6.3231	6.7653	6.7892	5.8902	8.1643	7.1857	7.037	6.1257	6.8565	6.6167	16.3845	5.5203	13.521	12.7691	5.6818	5.6376	6.2772	8.2937	5.5557
546	10.5801	9.6176	17.9292	10.4971	10.4237	13.7294	10.4842	9.683	10.0509	10.201	10.6272	15.7027	27.1364	16.2873	14.5466	15.2592	14.4584	11.0141	10.3004	11.0635	17.7979	18.2432	12.6773	17.3104	18.518	15.105	14.9589	6.1017	7.7575	6.3241	6.3521	6.7749	6.8043	5.9272	8.1892	7.2319	7.0589	6.1694	6.912	6.6452	16.4515	5.5526	13.5348	12.7681	5.7143	5.6805	6.3116	8.3461	5.5733
547	10.6058	9.6038	17.956	10.5086	10.4223	13.6867	10.4929	9.6606	10.0663	10.2135	10.614	15.6985	27.0658	16.2158	14.5232	15.2135	14.4352	10.9969	10.2863	11.068	17.765	18.1998	12.6272	17.2748	18.4418	15.0738	14.9006	6.1345	7.7753	6.3451	6.3582	6.8	6.8237	5.9548	8.2263	7.2765	7.0527	6.1958	6.9673	6.6613	16.4546	5.5543	13.5332	12.742	5.6955	5.7007	6.317	8.3553	5.5748
548	10.5582	9.5883	17.9481	10.5029	10.4181	13.674	10.5011	9.6536	10.0406	10.2106	10.6081	15.6411	26.9904	16.1631	14.4836	15.1599	14.3991	10.9681	10.2461	11.0325	17.7614	18.1757	12.6213	17.2697	18.3649	15.014	14.8666	6.1617	7.7663	6.3372	6.3534	6.8149	6.8464	5.9743	8.2564	7.3077	7.0498	6.1908	6.976	6.6552	16.4846	5.5115	13.5317	12.7608	5.6752	5.6926	6.2902	8.3117	5.5752
549	10.5358	9.562	17.9269	10.4952	10.3833	13.642	10.4488	9.6402	10.0392	10.1751	10.5784	15.6274	27.0035	16.1338	14.4715	15.1152	14.3887	10.9506	10.2206	11.0053	17.7761	18.1707	12.5992	17.2811	18.325	14.9858	14.8243	6.1434	7.7475	6.3361	6.3331	6.8108	6.8394	5.9597	8.284	7.3391	7.0342	6.1895	6.9694	6.6571	16.4721	5.5069	13.5027	12.7762	5.6838	5.6753	6.2934	8.2909	5.5571
550	10.5247	9.5652	17.9291	10.5218	10.3688	13.6331	10.4352	9.6359	10.0316	10.1394	10.5804	15.6171	27.0133	16.1024	14.434	15.1159	14.37	10.9485	10.202	10.9763	17.8058	18.1399	12.573	17.3074	18.2996	14.9604	14.7806	6.1737	7.7846	6.3458	6.3548	6.8133	6.8612	5.9662	8.3018	7.3614	7.0356	6.1758	6.9918	6.6756	16.4887	5.5193	13.4684	12.8115	5.6996	5.6851	6.3079	8.2843	5.5556
551	10.505	9.553	17.9407	10.511	10.3776	13.6118	10.4219	9.6142	9.9933	10.1248	10.6055	15.5951	27.0115	16.0801	14.3996	15.0934	14.3621	10.9527	10.22	10.9393	17.806	18.0748	12.5438	17.3311	18.2891	14.9419	14.7392	6.2018	7.7912	6.3585	6.3521	6.8161	6.8498	5.9604	8.3265	7.3809	7.0358	6.1642	7.017	6.6875	16.5054	5.5506	13.4711	12.7957	5.7073	5.703	6.3373	8.2755	5.5725
552	10.4852	9.5454	17.9175	10.4906	10.3615	13.603	10.4163	9.5893	9.9764	10.1816	10.5888	15.5636	26.9458	16.0703	14.3832	15.073	14.3681	10.936	10.224	10.944	17.7926	18.0333	12.5229	17.3506	18.2887	14.923	14.7282	6.2356	7.7944	6.3768	6.3503	6.8069	6.8369	5.9653	8.4092	7.393	7.0362	6.2069	7.0345	6.6957	16.5176	5.5683	13.4878	12.7864	5.7029	5.7255	6.337	8.2736	5.5925
553	10.5006	9.5206	17.8677	10.4666	10.3274	13.6044	10.3919	9.5778	9.9777	10.182	10.5626	15.5215	26.9209	16.0312	14.3548	15.0208	14.3612	10.8813	10.2022	10.9065	17.7632	18.0149	12.4612	17.2847	18.2594	14.8811	14.676	6.2212	7.794	6.3849	6.3637	6.7981	6.8424	5.9634	8.4431	7.4062	7.0362	6.1942	7.0621	6.6776	16.5103	5.59	13.4727	12.7656	5.6819	5.7428	6.3291	8.2549	5.5974
554	10.5115	9.4845	17.7989	10.4434	10.3194	13.6427	10.3749	9.5372	9.9573	10.1502	10.528	15.4675	26.8361	15.9542	14.2938	14.9252	14.3199	10.8424	10.1619	10.8277	17.6937	17.9463	12.3955	17.1981	18.2013	14.8018	14.6109	6.2262	7.8023	6.3801	6.3452	6.8084	6.8459	5.9748	8.4523	7.4084	7.0248	6.1864	7.0652	6.6651	16.4672	5.5731	13.423	12.7028	5.6714	5.7243	6.3222	8.2314	5.6103
555	10.5029	9.4551	17.7484	10.4518	10.2889	13.6219	10.3656	9.5057	9.9409	10.1054	10.4869	15.4427	26.7726	15.92	14.3169	14.9014	14.32	10.8284	10.1523	10.7996	17.6465	17.9139	12.3606	17.1929	18.1502	14.7515	14.5706	6.2106	7.8061	6.3761	6.2941	6.7776	6.8389	5.9662	8.4652	7.4155	7.0146	6.1744	7.0666	6.6697	16.4787	5.5875	13.4032	12.6771	5.6788	5.7434	6.3567	8.2342	5.6246
556	10.4907	9.4428	17.7212	10.4477	10.2569	13.606	10.3439	9.4695	9.9383	10.0844	10.4558	15.4486	26.6999	15.8927	14.2995	14.8866	14.3343	10.8129	10.1386	10.7584	17.6317	17.9148	12.3373	17.2012	18.1049	14.7031	14.5427	6.2249	7.8076	6.3766	6.2952	6.7544	6.8625	5.9587	8.5021	7.4214	7.0139	6.1827	7.0757	6.6661	16.5011	5.5992	13.395	12.6629	5.6922	5.7624	6.3447	8.2715	5.6213
557	10.4718	9.4095	17.6763	10.3964	10.2547	13.5741	10.3341	9.4591	9.8927	10.0618	10.4135	15.4136	26.6126	15.8678	14.2567	14.8421	14.2895	10.7754	10.0835	10.7063	17.5977	17.8769	12.2922	17.1698	18.0361	14.6976	14.5081	6.221	7.8129	6.3586	6.3048	6.7602	6.8416	5.9582	8.5513	7.4222	6.9939	6.1725	7.0994	6.6623	16.4599	5.5847	13.3377	12.6542	5.6884	5.7378	6.3325	8.2774	5.6089
558	10.445	9.392	17.6512	10.3738	10.2444	13.5733	10.3187	9.4616	9.8766	10.0484	10.4413	15.376	26.5213	15.8324	14.2189	14.7484	14.2593	10.7315	10.0704	10.6825	17.5646	17.824	12.2515	17.1526	18.0024	14.6515	14.476	6.2201	7.8531	6.3508	6.3164	6.7671	6.8323	5.9594	8.5694	7.4439	6.9727	6.1699	7.0973	6.6468	16.4317	5.5968	13.2862	12.6925	5.677	5.7519	6.334	8.2818	5.6451
559	10.4469	9.3842	17.6273	10.3955	10.2668	13.5838	10.3085	9.4589	9.8762	10.0529	10.4871	15.3504	26.4413	15.7768	14.194	14.6781	14.215	10.7343	10.033	10.6651	17.5604	17.7836	12.2118	17.0888	17.9861	14.6194	14.4432	6.2386	7.9059	6.3891	6.3306	6.7501	6.8483	5.9644	8.6125	7.4539	6.9697	6.1788	7.1046	6.6579	16.4125	5.6003	13.2717	12.724	5.6797	5.7831	6.3645	8.2705	5.6527
560	10.4459	9.363	17.6111	10.3968	10.2809	13.5892	10.3032	9.4558	9.8815	10.0491	10.4688	15.3141	26.3737	15.6943	14.137	14.6566	14.1334	10.7078	9.9908	10.6175	17.5116	17.7621	12.1715	17.0778	17.9402	14.594	14.3861	6.2655	7.9362	6.4207	6.3149	6.758	6.8387	5.976	8.6794	7.484	6.9735	6.2111	7.1272	6.6632	16.3963	5.5928	13.2859	12.7278	5.6814	5.762	6.3797	8.2726	5.634
561	10.4385	9.3633	17.5842	10.3815	10.2739	13.592	10.2852	9.4538	9.8654	10.069	10.4556	15.3177	26.3649	15.6999	14.1234	14.6634	14.1327	10.7289	9.9931	10.6165	17.4829	17.7886	12.173	17.1153	17.9551	14.6028	14.3903	6.2845	7.9534	6.4427	6.3223	6.7773	6.8412	5.9821	8.7249	7.5005	6.9768	6.2213	7.1293	6.6649	16.392	5.6261	13.3069	12.7503	5.7066	5.7861	6.3959	8.3068	5.6516
562	10.4374	9.356	17.5313	10.3531	10.2376	13.5931	10.2661	9.4665	9.8542	10.0598	10.4605	15.3409	26.3566	15.6823	14.1376	14.6461	14.1362	10.7293	9.9684	10.5925	17.4378	17.7977	12.1316	17.1292	17.921	14.5867	14.3907	6.2925	7.9698	6.4327	6.2994	6.7798	6.8425	5.9819	8.7723	7.528	6.9768	6.2281	7.1494	6.6965	16.363	5.6514	13.2919	12.7498	5.7128	5.8235	6.4002	8.3334	5.68
563	10.4522	9.3493	17.4785	10.3663	10.2215	13.6071	10.2886	9.4456	9.8329	10.0697	10.4401	15.34	26.3215	15.6834	14.1191	14.5821	14.1073	10.6928	9.9617	10.5885	17.4293	17.776	12.1154	17.1359	17.8977	14.5489	14.3572	6.3076	7.9763	6.4463	6.3078	6.7885	6.8482	5.9697	8.8232	7.5323	6.9737	6.2464	7.1567	6.7134	16.3538	5.6683	13.2835	12.7175	5.7226	5.8378	6.3868	8.2923	5.6749
564	10.4153	9.3279	17.4497	10.374	10.2118	13.6027	10.2704	9.4088	9.8184	10.0851	10.4162	15.3045	26.2589	15.6618	14.1095	14.5298	14.0674	10.6683	9.9642	10.5697	17.3896	17.7649	12.0766	17.1349	17.8487	14.5291	14.315	6.3099	8.0009	6.4547	6.3149	6.7994	6.847	5.9563	8.8377	7.5327	6.9653	6.2527	7.1287	6.7068	16.3443	5.6763	13.2833	12.6979	5.7265	5.8398	6.3831	8.2562	5.6777
565	10.4059	9.3196	17.4808	10.3993	10.2082	13.6222	10.2517	9.3923	9.8414	10.0886	10.4305	15.3093	26.2727	15.6504	14.1221	14.5626	14.0833	10.6609	9.9821	10.5718	17.3539	17.8208	12.0738	17.1553	17.8391	14.5327	14.3056	6.316	8.0787	6.468	6.3502	6.8382	6.8691	5.9625	8.8765	7.5352	6.9922	6.2558	7.1338	6.7147	16.3785	5.7037	13.3515	12.7595	5.7502	5.8717	6.432	8.2831	5.7158
566	10.417	9.3023	17.4894	10.3755	10.2045	13.6271	10.2467	9.3812	9.8564	10.0829	10.4609	15.34	26.3285	15.6591	14.1497	14.573	14.1053	10.6709	10.002	10.5791	17.3405	17.8556	12.0668	17.1389	17.8385	14.5816	14.3327	6.3376	8.1138	6.4778	6.3746	6.8343	6.8805	5.9965	8.8872	7.5608	6.9803	6.266	7.135	6.7728	16.4796	5.735	13.3996	12.8377	5.7784	5.8983	6.4631	8.2807	5.7727
567	10.4283	9.2686	17.4638	10.3599	10.1859	13.6058	10.2372	9.354	9.8463	10.0873	10.47	15.3592	26.3218	15.6524	14.182	14.5594	14.0944	10.6818	9.9873	10.5977	17.3401	17.8788	12.0569	17.1614	17.8411	14.607	14.3391	6.3657	8.1109	6.4917	6.3756	6.8309	6.8781	6.016	8.9201	7.5758	6.9505	6.2853	7.1408	6.7981	16.5401	5.7613	13.4487	12.9066	5.8013	5.938	6.468	8.2863	5.8178
568	10.4034	9.2743	17.4195	10.37	10.1871	13.5843	10.2298	9.3335	9.864	10.0709	10.4774	15.3258	26.2557	15.6076	14.1644	14.5179	14.0571	10.6498	9.9465	10.5784	17.3358	17.8957	12.0092	17.1704	17.7907	14.5709	14.2985	6.3867	8.1418	6.4931	6.3817	6.8508	6.8952	6.0298	8.9789	7.6019	6.9713	6.3141	7.1594	6.7913	16.5821	5.7633	13.4847	12.9006	5.8054	5.9404	6.4644	8.3085	5.8055
569	10.4029	9.2716	17.3785	10.389	10.1866	13.5971	10.2346	9.3528	9.8623	10.0774	10.4904	15.2792	26.1922	15.5687	14.1299	14.5074	14.0196	10.6335	9.9239	10.5807	17.2877	17.914	11.9656	17.1739	17.7426	14.5321	14.286	6.3908	8.1689	6.5084	6.373	6.8685	6.9013	6.0805	9.0162	7.6676	7.0134	6.3478	7.2145	6.7995	16.5814	5.7467	13.5217	12.8826	5.809	5.9558	6.492	8.3503	5.8167
570	10.4061	9.2791	17.3173	10.4071	10.1574	13.5868	10.2279	9.3684	9.8766	10.1116	10.4776	15.2281	26.1889	15.5183	14.1025	14.512	13.9927	10.6465	9.9164	10.6028	17.2049	17.9228	11.9522	17.1615	17.7512	14.5139	14.2772	6.4273	8.2068	6.5271	6.3834	6.8746	6.9024	6.1127	9.053	7.7166	7.0399	6.3727	7.2314	6.821	16.6138	5.7534	13.539	12.8978	5.8243	5.9714	6.5141	8.3777	5.8387
571	10.4205	9.2929	17.2997	10.4156	10.1666	13.5934	10.2691	9.3967	9.9122	10.1258	10.4787	15.2144	26.1858	15.5058	14.0693	14.4975	13.9851	10.6653	9.9311	10.6026	17.2114	17.9064	11.9477	17.1441	17.7443	14.4839	14.2361	6.4832	8.2491	6.5547	6.4247	6.8834	6.9315	6.1447	9.1053	7.7482	7.0391	6.4007	7.2734	6.8623	16.6507	5.787	13.5409	12.9111	5.8539	5.9906	6.5314	8.3871	5.8651
572	10.4047	9.2658	17.2619	10.3677	10.1327	13.5511	10.2514	9.3716	9.8835	10.0913	10.4641	15.1723	26.165	15.4298	13.9937	14.4604	13.9141	10.6202	9.9156	10.5821	17.1786	17.8979	11.9061	17.0996	17.6709	14.4297	14.1798	6.4769	8.2529	6.5675	6.4266	6.8815	6.9168	6.1699	9.1326	7.758	7.0284	6.3916	7.2791	6.88	16.6454	5.8001	13.5197	12.8886	5.8733	6.0096	6.5426	8.3797	5.8695
573	10.3915	9.2353	17.2419	10.3315	10.1199	13.5218	10.1978	9.3523	9.841	10.0665	10.4607	15.1243	26.1527	15.3835	13.9732	14.4273	13.8586	10.5869	9.8958	10.5645	17.147	17.9264	11.8612	17.0144	17.6656	14.3708	14.1423	6.4561	8.2866	6.5761	6.4325	6.8886	6.9083	6.1624	9.1732	7.7754	7.0192	6.3857	7.2868	6.9097	16.6257	5.8082	13.5677	12.8867	5.8688	6.0377	6.5312	8.3983	5.8647
574	10.4027	9.2375	17.28	10.3616	10.1334	13.5123	10.2049	9.3473	9.855	10.0696	10.4819	15.1	26.1333	15.3712	13.9875	14.4352	13.8561	10.5819	9.8981	10.5844	17.1613	17.9652	11.8589	16.9718	17.6869	14.3611	14.1136	6.4786	8.3422	6.6072	6.4373	6.8971	6.9163	6.1684	9.1982	7.7947	7.0161	6.3811	7.3179	6.9284	16.6535	5.832	13.6189	12.9257	5.8644	6.0518	6.5266	8.4301	5.8764
575	10.3597	9.2116	17.2901	10.3757	10.1194	13.5023	10.2229	9.3397	9.8583	10.0971	10.4908	15.0509	26.0452	15.3283	13.9781	14.4207	13.8367	10.5791	9.9076	10.5887	17.1754	18.0078	11.8316	16.9571	17.7095	14.3565	14.1022	6.4885	8.3724	6.6078	6.458	6.8656	6.9381	6.2017	9.2261	7.8067	7.021	6.3769	7.3217	6.9278	16.6819	5.8624	13.6662	12.971	5.8856	6.037	6.5343	8.4636	5.8908
576	10.3277	9.2149	17.2908	10.3812	10.0943	13.4856	10.2537	9.3398	9.858	10.11	10.4823	15.002	25.9751	15.2794	13.9517	14.3616	13.785	10.5625	9.9023	10.575	17.1283	17.9853	11.7958	16.8885	17.6806	14.2993	14.0615	6.501	8.4035	6.6143	6.4534	6.8763	6.9245	6.2418	9.2494	7.8239	7.0233	6.4027	7.3511	6.9075	16.6646	5.8771	13.6251	12.9831	5.8861	6.0286	6.5422	8.4789	5.8897
577	10.3322	9.2287	17.2597	10.3872	10.0811	13.4345	10.233	9.3226	9.8448	10.1251	10.4642	14.9704	25.9445	15.2654	13.9321	14.2866	13.7559	10.5492	9.8526	10.5729	17.1008	17.9619	11.7542	16.8734	17.7015	14.2602	14.0148	6.5328	8.4411	6.6535	6.4414	6.9129	6.9403	6.2736	9.2616	7.8474	7.0331	6.4103	7.3953	6.9068	16.6232	5.8946	13.5934	12.9625	5.9066	6.0658	6.5796	8.4832	5.9113
578	10.3528	9.2263	17.2167	10.4396	10.0992	13.4719	10.2016	9.3028	9.8515	10.121	10.4443	14.9718	25.9445	15.2593	13.9437	14.2781	13.7404	10.5481	9.843	10.5614	17.1063	17.9191	11.7294	16.9059	17.6877	14.2231	14.02	6.5772	8.4508	6.6637	6.4697	6.9399	6.9384	6.2929	9.2622	7.9038	7.0515	6.4461	7.4469	6.9247	16.6371	5.9221	13.6372	12.9716	5.9265	6.0903	6.5964	8.4859	5.9428
579	10.3554	9.2024	17.1993	10.422	10.1116	13.4801	10.2008	9.2795	9.8577	10.1209	10.4801	14.9877	25.9733	15.2792	13.9602	14.3386	13.7205	10.573	9.88	10.5816	17.1341	17.8899	11.7581	16.9794	17.7118	14.2199	14.0561	6.6193	8.4478	6.6746	6.4835	6.9652	6.9401	6.3024	9.301	7.967	7.0534	6.4769	7.4806	6.9694	16.6751	5.9478	13.7055	13.0163	5.974	6.1403	6.6389	8.5106	5.983
580	10.3233	9.2183	17.1659	10.4153	10.0809	13.4214	10.1798	9.281	9.8511	10.0938	10.4929	15	25.9742	15.2782	13.9518	14.3427	13.7125	10.554	9.8886	10.5729	17.1123	17.8618	11.7841	16.9654	17.7425	14.1907	14.0229	6.6062	8.4705	6.6889	6.4773	6.9721	6.9325	6.3352	9.3392	8.0038	7.0711	6.4751	7.49	7.0184	16.6528	5.9605	13.708	13.0229	5.9999	6.1611	6.6634	8.5104	5.9996
581	10.2871	9.212	17.1757	10.3833	10.0744	13.397	10.1762	9.2803	9.8476	10.0776	10.4776	14.9495	25.9493	15.2548	13.9203	14.2549	13.6467	10.4911	9.8461	10.5356	17.0414	17.8485	11.7475	16.9175	17.7908	14.1208	13.9747	6.5938	8.4745	6.691	6.4717	6.9597	6.942	6.3519	9.3861	8.0631	7.0812	6.5052	7.4976	7.0174	16.5948	5.9443	13.6458	12.9993	5.9811	6.1611	6.6317	8.4652	5.9901
582	10.2557	9.1901	17.1829	10.3656	10.0875	13.3833	10.1745	9.2836	9.8319	10.0694	10.4668	14.9086	25.912	15.23	13.9063	14.2201	13.6028	10.4669	9.8407	10.5295	16.9756	17.807	11.7216	16.8341	17.811	14.1186	13.947	6.5842	8.4716	6.6872	6.4877	6.955	6.939	6.3756	9.4329	8.0924	7.0764	6.5482	7.4958	7.0181	16.5403	5.9574	13.6189	12.9891	6.0141	6.202	6.6326	8.4743	6.008
583	10.2272	9.2091	17.1657	10.3632	10.0767	13.3427	10.1973	9.2726	9.8405	10.0853	10.4693	14.9018	25.8972	15.2192	13.9204	14.2081	13.6119	10.4478	9.8435	10.5595	16.9831	17.7838	11.7324	16.7566	17.8484	14.0861	13.9275	6.6074	8.4894	6.7015	6.482	6.968	6.915	6.395	9.4745	8.1262	7.0778	6.5707	7.5151	7.0122	16.5449	6.0101	13.6446	13.0057	6.0273	6.2337	6.6838	8.5425	6.0324
584	10.2052	9.219	17.114	10.3506	10.0692	13.324	10.1836	9.267	9.8375	10.0758	10.4579	14.8959	25.9054	15.2104	13.9402	14.2126	13.6193	10.4583	9.8496	10.5524	17.0326	17.7766	11.7473	16.7274	17.902	14.0761	13.8989	6.6411	8.4699	6.7245	6.5028	6.9669	6.9078	6.3914	9.4934	8.1509	7.0976	6.5901	7.5463	7.0502	16.6057	6.0339	13.685	13.0253	6.0454	6.2244	6.7121	8.6123	6.0608
585	10.2257	9.2056	17.0836	10.3827	10.0667	13.2841	10.1941	9.2652	9.8505	10.0815	10.4555	14.8855	25.8334	15.2111	13.9705	14.2061	13.6152	10.4638	9.8626	10.5472	17.048	17.7829	11.7641	16.7467	17.9316	14.0888	13.8489	6.6623	8.4831	6.7348	6.5228	6.9883	6.9381	6.4048	9.5276	8.1602	7.1279	6.6215	7.5561	7.098	16.6316	6.0527	13.7663	13.0643	6.0599	6.2633	6.7328	8.6529	6.0902
586	10.2504	9.1927	17.0821	10.3793	10.0787	13.2836	10.1866	9.2992	9.8779	10.0939	10.4499	14.888	25.7786	15.2268	14.0309	14.1866	13.5792	10.4857	9.8495	10.5384	17.0474	17.7901	11.7852	16.7566	17.9337	14.0745	13.8396	6.6823	8.5156	6.7319	6.5422	7.004	6.9513	6.4581	9.5642	8.1987	7.1188	6.6418	7.5837	7.1165	16.6606	6.0791	13.797	13.0937	6.0552	6.2968	6.7399	8.6619	6.1201
587	10.2141	9.1825	17.0903	10.362	10.0905	13.2315	10.1373	9.2803	9.8476	10.0747	10.4135	14.8893	25.6908	15.1927	14.0219	14.1546	13.4949	10.433	9.7922	10.5233	16.9628	17.7995	11.7634	16.7383	17.8875	14.0331	13.7969	6.7006	8.5325	6.7266	6.5267	6.9738	6.9278	6.4646	9.554	8.2201	7.0962	6.627	7.5948	7.0947	16.6613	6.0523	13.813	13.1321	6.0544	6.3151	6.7346	8.6681	6.1261
588	10.1292	9.1974	17.092	10.3529	10.0756	13.2168	10.1356	9.2731	9.8096	10.0576	10.4053	14.86	25.6476	15.1388	14.0346	14.12	13.4414	10.3955	9.7656	10.5004	16.9269	17.7863	11.7057	16.706	17.8785	13.9759	13.7581	6.7354	8.5317	6.7334	6.5323	6.9521	6.9487	6.4704	9.5485	8.2627	7.1137	6.6251	7.597	7.0728	16.7163	6.0215	13.8092	13.1131	6.0888	6.3174	6.7316	8.6734	6.1385
589	10.0843	9.1463	17.0936	10.2904	10.0027	13.1736	10.105	9.2269	9.7561	10.0003	10.3753	14.848	25.6149	15.1071	14.0161	14.0946	13.404	10.3797	9.7791	10.4691	16.9178	17.7548	11.6806	16.6967	17.8921	13.9454	13.7367	6.737	8.5007	6.7464	6.5179	6.9507	6.9335	6.4425	9.5514	8.292	7.1024	6.6079	7.5848	7.0688	16.7419	6.0331	13.7874	13.0784	6.0744	6.3304	6.7452	8.6972	6.1612
590	10.0755	9.1321	17.0301	10.2397	9.9554	13.1793	10.0606	9.2179	9.7483	10.013	10.3567	14.8258	25.5744	15.0615	14.0067	14.0514	13.3898	10.3746	9.7766	10.4225	16.8894	17.7285	11.6945	16.6783	17.8859	13.9115	13.7037	6.7403	8.4864	6.7353	6.5169	6.9733	6.9095	6.4164	9.5349	8.2928	7.0745	6.5997	7.5976	7.0803	16.7012	6.0335	13.7607	13.0902	6.0558	6.3173	6.74	8.7144	6.1395
591	9.9979	9.1459	16.98	10.2305	9.9016	13.1719	10.073	9.2227	9.7428	9.9791	10.332	14.7887	25.529	15.0624	14.0349	14.0411	13.3813	10.3945	9.7671	10.4217	16.8808	17.714	11.7136	16.7194	17.8786	13.9017	13.6679	6.694	8.4964	6.7282	6.5236	6.9778	6.881	6.406	9.5418	8.315	7.0571	6.6174	7.6087	7.1071	16.6962	6.0583	13.7883	13.1147	6.0725	6.3257	6.7619	8.7069	6.1238
592	9.9871	9.1283	16.9299	10.2218	9.8671	13.1202	10.0617	9.2218	9.7502	9.9493	10.337	14.7533	25.4384	15.0496	14.0463	14.0135	13.3235	10.3746	9.7563	10.3947	16.851	17.683	11.6746	16.7023	17.8998	13.8827	13.6353	6.697	8.4912	6.7706	6.5383	6.9547	6.8867	6.3878	9.5729	8.3503	7.0475	6.627	7.6019	7.1019	16.7283	6.0693	13.8364	13.1261	6.1074	6.3516	6.7717	8.7002	6.104
593	9.9948	9.1348	16.9539	10.225	9.8805	13.1405	10.0628	9.2461	9.7882	9.9808	10.3264	14.7412	25.4151	15.0562	14.0693	13.97	13.3379	10.3656	9.763	10.4041	16.8685	17.7199	11.6786	16.6965	17.9616	13.9029	13.6493	6.7595	8.5236	6.8306	6.5734	7.0087	6.9017	6.386	9.6701	8.4199	7.0672	6.6731	7.6059	7.1383	16.763	6.102	13.8657	13.1757	6.137	6.3927	6.7968	8.7266	6.1034
594	10.0293	9.1457	16.9555	10.2191	9.927	13.2088	10.0863	9.2863	9.8309	10.0318	10.3399	14.7392	25.3779	15.0946	14.0787	13.9518	13.3431	10.4005	9.7604	10.3927	16.864	17.7261	11.7024	16.681	17.9802	13.9094	13.6371	6.8221	8.552	6.8617	6.6116	7.0652	6.9436	6.4426	9.7832	8.4977	7.1309	6.7387	7.6664	7.1818	16.7676	6.1264	13.8003	13.1913	6.1642	6.4199	6.7996	8.7335	6.131
595	10.0165	9.144	16.9751	10.2058	9.9405	13.1704	10.0799	9.3111	9.8641	10.0419	10.3427	14.6983	25.3255	15.0932	14.0937	13.9149	13.2936	10.403	9.7291	10.3726	16.83	17.6941	11.709	16.7153	17.9517	13.8512	13.6205	6.8196	8.5613	6.8516	6.6338	7.0446	6.9657	6.4731	9.8666	8.5263	7.2015	6.7756	7.706	7.2093	16.7589	6.1358	13.7349	13.1312	6.1796	6.4321	6.8323	8.7369	6.1445
596	10.0009	9.1078	16.9882	10.2202	9.9044	13.1455	10.1007	9.3175	9.8715	10.0552	10.3472	14.6505	25.2874	15.0266	14.0938	13.8799	13.2732	10.3548	9.7238	10.3516	16.7921	17.6407	11.6741	16.7155	17.8915	13.8248	13.5687	6.814	8.5731	6.851	6.6447	7.0423	6.9575	6.486	9.8964	8.5497	7.1941	6.7869	7.7405	7.2008	16.6863	6.1362	13.6905	13.0049	6.1548	6.4307	6.809	8.7111	6.1651
597	9.998	9.1126	17.0277	10.2674	9.9238	13.1672	10.1723	9.3338	9.9026	10.0895	10.3741	14.6398	25.1949	14.9692	14.0913	13.8686	13.2613	10.3224	9.7197	10.339	16.768	17.5914	11.6382	16.6887	17.8511	13.7945	13.529	6.8859	8.6093	6.8835	6.6442	7.0863	6.982	6.5291	9.9389	8.6057	7.1974	6.805	7.7914	7.1852	16.6927	6.1474	13.6547	12.955	6.1524	6.4565	6.8115	8.7169	6.1792
598	9.9622	9.1019	16.9817	10.2459	9.9138	13.1272	10.1239	9.3	9.8595	10.0709	10.3197	14.6417	25.1321	14.9027	14.062	13.8391	13.2259	10.2861	9.6938	10.3093	16.7407	17.5863	11.6346	16.7136	17.8422	13.7584	13.4957	6.9239	8.5728	6.8989	6.6266	7.0781	6.9707	6.5191	9.9308	8.6176	7.1747	6.8462	7.7881	7.1685	16.7695	6.1709	13.6638	12.999	6.1504	6.5288	6.8473	8.7174	6.1849
599	9.9416	9.0826	16.9567	10.2282	9.9024	13.0969	10.1083	9.3119	9.8615	10.0451	10.2894	14.6496	25.0854	14.9022	14.078	13.8428	13.1954	10.315	9.6781	10.3088	16.7325	17.6082	11.6345	16.7526	17.8499	13.7406	13.5029	6.9283	8.5637	6.8843	6.635	7.0533	6.9839	6.5395	9.9374	8.6284	7.1743	6.8607	7.8246	7.179	16.8036	6.1916	13.6762	13.0803	6.1719	6.5403	6.8924	8.7146	6.2286
600	9.9014	9.0646	16.9319	10.1752	9.8752	13.0722	10.0459	9.2767	9.863	10.0374	10.2292	14.6823	25.1237	14.9337	14.1212	13.8731	13.2453	10.3518	9.6911	10.3389	16.7693	17.6324	11.6587	16.7762	17.8167	13.7292	13.5007	6.9281	8.5656	6.8737	6.6374	7.0665	6.9748	6.5342	9.8799	8.6378	7.1869	6.8599	7.8413	7.26	16.856	6.2384	13.7337	13.1321	6.2229	6.5925	6.9124	8.717	6.2863
601	9.868	9.0391	16.9136	10.1383	9.8415	13.0572	10.0514	9.2389	9.8334	9.9601	10.1588	14.6809	25.1265	14.9555	14.1015	13.8589	13.2689	10.3617	9.6811	10.31	16.7549	17.6681	11.6492	16.7369	17.8355	13.6989	13.4999	6.9045	8.5784	6.871	6.6276	7.0359	6.9662	6.5212	9.8929	8.6506	7.1754	6.8631	7.8532	7.2982	16.8409	6.2677	13.74	13.1409	6.2249	6.6069	6.9169	8.7118	6.2643
602	9.8371	9.03	16.8946	10.1163	9.818	13.013	10.0298	9.2236	9.8251	9.9124	10.0883	14.6572	25.0258	14.8634	14.0522	13.8021	13.1631	10.2865	9.6184	10.2328	16.6749	17.6718	11.5834	16.7036	17.7943	13.667	13.426	6.877	8.5906	6.8713	6.6264	6.998	6.9398	6.4994	9.8905	8.6646	7.1293	6.8073	7.8804	7.2591	16.834	6.2458	13.7299	13.1107	6.2261	6.561	6.8914	8.6984	6.2355
603	9.8019	9.0092	16.8995	10.0928	9.818	12.9925	10.0089	9.2574	9.8349	9.8982	10.0701	14.6691	24.9939	14.827	14.0089	13.7963	13.1241	10.2841	9.607	10.2085	16.6776	17.691	11.5574	16.7554	17.7109	13.6827	13.4131	6.8988	8.6256	6.8601	6.6252	6.992	6.8903	6.4976	9.9065	8.68	7.1054	6.8073	7.9068	7.2452	16.8813	6.2233	13.7393	13.1392	6.2396	6.5877	6.9161	8.7194	6.2377
604	9.7447	8.9805	16.8709	10.0413	9.7809	12.9326	9.9912	9.2051	9.7809	9.848	10.0336	14.6235	24.9189	14.7767	13.9763	13.7554	13.1042	10.2397	9.5577	10.1776	16.6742	17.7056	11.5241	16.7218	17.6228	13.6759	13.3659	6.8643	8.5728	6.8355	6.5975	6.9715	6.8638	6.457	9.9008	8.6775	7.1035	6.7926	7.8694	7.2117	16.8233	6.1727	13.7156	13.1129	6.1997	6.5786	6.8855	8.7063	6.2252
605	9.7214	8.963	16.8978	10.013	9.7604	12.9601	9.9715	9.1973	9.7591	9.8417	9.9662	14.5121	24.8076	14.7362	13.9297	13.6712	13.0715	10.2023	9.5153	10.1341	16.6321	17.6659	11.4813	16.6419	17.5634	13.6027	13.2828	6.8944	8.6257	6.8899	6.6084	6.9579	6.8731	6.4938	9.9514	8.6957	7.1064	6.8054	7.8688	7.2156	16.7842	6.1857	13.6685	13.094	6.2217	6.5866	6.8732	8.6375	6.2106
606	9.7305	8.9343	16.9019	10.0002	9.7608	12.9989	9.9546	9.2042	9.759	9.8188	9.9489	14.4478	24.7549	14.6762	13.9153	13.6699	13.0003	10.1751	9.5352	10.0861	16.5885	17.643	11.4594	16.654	17.5286	13.5632	13.2543	6.9185	8.6674	6.9412	6.6196	7.0143	6.8768	6.509	9.9896	8.7117	7.1065	6.8031	7.894	7.2259	16.7843	6.2012	13.6178	13.0621	6.2358	6.6024	6.8712	8.6148	6.2255
607	9.7197	8.9324	16.9112	9.9834	9.7649	12.9976	9.9346	9.1913	9.738	9.8158	9.9929	14.4558	24.7101	14.6169	13.8972	13.6573	12.9921	10.1805	9.5622	10.0938	16.5681	17.6682	11.4241	16.6941	17.4571	13.5677	13.2296	6.9039	8.7158	6.91	6.6028	7.0678	6.879	6.4827	10.0104	8.7318	7.0901	6.8081	7.9243	7.2288	16.8212	6.2256	13.6464	13.0521	6.2591	6.6489	6.909	8.6484	6.2726
608	9.67	8.9123	16.8421	9.9922	9.712	12.9184	9.9096	9.1843	9.6932	9.7677	9.9438	14.4229	24.6397	14.5715	13.8482	13.6083	12.9536	10.1551	9.5319	10.0528	16.4953	17.6546	11.3831	16.6819	17.4056	13.5503	13.2093	6.8895	8.6694	6.8928	6.582	7.0238	6.8369	6.4322	10.0051	8.6782	7.0431	6.7888	7.9302	7.2336	16.8084	6.2395	13.7028	13.04	6.2588	6.6313	6.9109	8.6491	6.2821
609	9.6539	8.892	16.7977	9.9822	9.7139	12.8872	9.9108	9.2038	9.6591	9.766	9.9136	14.3629	24.5269	14.4771	13.7884	13.552	12.9219	10.0921	9.4839	9.9722	16.4548	17.6608	11.3102	16.6373	17.3395	13.5072	13.147	6.8776	8.6454	6.9128	6.5924	7.0035	6.8666	6.4292	10.0159	8.6427	7.0445	6.7883	7.9969	7.2378	16.7341	6.2168	13.6812	12.9853	6.2231	6.5804	6.9068	8.6411	6.2218
610	9.6531	8.8896	16.8113	9.9689	9.708	12.9058	9.9301	9.1857	9.6571	9.7604	9.8708	14.3278	24.4141	14.4189	13.7233	13.5164	12.8765	10.0571	9.4484	9.9445	16.4308	17.6648	11.2859	16.6184	17.2832	13.4767	13.1303	6.8743	8.6768	6.9197	6.5925	7.0155	6.8951	6.477	10.0027	8.6791	7.0706	6.8095	8.0108	7.2235	16.6303	6.1973	13.6591	13.0146	6.2094	6.5906	6.8968	8.6449	6.2251
611	9.645	8.8824	16.782	9.9445	9.6923	12.9065	9.9068	9.1947	9.6344	9.733	9.8919	14.2726	24.3479	14.3941	13.6905	13.4707	12.8646	10.0514	9.434	9.9095	16.4249	17.6418	11.2182	16.5916	17.2096	13.4324	13.0858	6.8571	8.712	6.9237	6.5945	7.016	6.8724	6.5288	10.0073	8.6872	7.0985	6.8401	7.998	7.2109	16.5652	6.2095	13.6493	13.0288	6.2209	6.6058	6.8678	8.661	6.2355
612	9.6691	8.8681	16.7863	9.9291	9.6715	12.8896	9.8363	9.1943	9.629	9.74	9.8771	14.2475	24.2987	14.3764	13.7538	13.4466	12.8687	10.0709	9.4404	9.9294	16.4218	17.6653	11.2086	16.6026	17.1613	13.4525	13.0848	6.8755	8.7231	6.9241	6.6098	6.999	6.8559	6.5607	10.0388	8.7403	7.0956	6.8695	8.0233	7.2338	16.574	6.227	13.6599	13.0753	6.236	6.6362	6.9149	8.696	6.2526
613	9.6961	8.869	16.7806	9.8886	9.6756	12.874	9.8184	9.2444	9.668	9.7203	9.8326	14.325	24.3652	14.4127	13.8344	13.4934	12.8874	10.0807	9.5024	9.9496	16.4863	17.7433	11.2502	16.6405	17.2021	13.5248	13.1026	6.8935	8.7477	6.9663	6.6093	7.0084	6.8667	6.571	10.0635	8.7382	7.0954	6.876	8.0106	7.2692	16.6878	6.275	13.69	13.1364	6.2898	6.6683	6.957	8.7314	6.289
614	9.7289	8.8826	16.7707	9.9114	9.7002	12.9105	9.8583	9.2449	9.7026	9.7536	9.8481	14.3181	24.3244	14.4099	13.8336	13.4981	12.8808	10.0404	9.5366	9.9606	16.4532	17.7056	11.2339	16.677	17.2372	13.5653	13.1325	6.9608	8.7864	7.0095	6.6687	7.0348	6.9154	6.6017	10.131	8.7469	7.1334	6.9204	8.074	7.2887	16.7006	6.2851	13.6756	13.1528	6.2886	6.694	6.9921	8.7357	6.3
615	9.6724	8.8776	16.7075	9.9279	9.6842	12.886	9.8535	9.2065	9.7185	9.7427	9.8594	14.281	24.2642	14.3689	13.7667	13.4691	12.8419	10.0311	9.5632	9.9463	16.3869	17.7589	11.2175	16.7008	17.2242	13.5892	13.0861	6.9671	8.7884	7.0125	6.6678	7.0634	6.9239	6.6149	10.1393	8.7702	7.1146	6.8988	8.0419	7.2871	16.7342	6.2901	13.6496	13.1747	6.278	6.7273	6.9866	8.7252	6.306
616	9.6235	8.8669	16.6489	9.888	9.677	12.8401	9.8306	9.1742	9.6971	9.7214	9.8528	14.2417	24.2632	14.3284	13.7414	13.4622	12.8042	10.0172	9.5414	9.9233	16.342	17.7931	11.2055	16.73	17.1678	13.628	13.0642	6.9728	8.7926	6.9666	6.6498	7.0495	6.9095	6.6032	10.1563	8.783	7.1063	6.8838	8.0228	7.2594	16.7795	6.3009	13.6312	13.1604	6.2947	6.7801	6.9978	8.6701	6.3268
617	9.627	8.8931	16.6468	9.8644	9.6577	12.8484	9.8088	9.1758	9.6867	9.7195	9.8633	14.2365	24.1896	14.3023	13.7038	13.4353	12.7687	9.9835	9.5327	9.8924	16.2679	17.7458	11.1634	16.7068	17.0897	13.5975	13.0048	7.0083	8.7997	6.9651	6.6848	7.0345	6.9414	6.6127	10.1998	8.7611	7.1133	6.8948	8.0125	7.2493	16.7654	6.316	13.6298	13.1217	6.3086	6.7738	6.9947	8.6442	6.3444
618	9.6394	8.9088	16.6811	9.854	9.6856	12.895	9.8283	9.2136	9.7009	9.7535	9.8464	14.1728	24.0853	14.2502	13.6871	13.3859	12.7443	9.9419	9.5509	9.8882	16.2311	17.6498	11.1391	16.6926	17.0705	13.6	12.9174	7.0441	8.8407	7.006	6.7315	7.0808	6.9706	6.6516	10.2736	8.7669	7.1284	6.9279	8.0216	7.2665	16.7054	6.346	13.6305	13.0772	6.3238	6.7771	7.0074	8.6746	6.3503
619	9.6356	8.9267	16.6214	9.8548	9.6779	12.8968	9.8113	9.2299	9.6986	9.7367	9.7995	14.1336	24.0265	14.2198	13.6908	13.3503	12.7234	9.9059	9.5684	9.8436	16.2297	17.6484	11.1307	16.6449	17.0496	13.5861	12.8677	7.0504	8.8555	7.0375	6.7248	7.0795	6.9755	6.6538	10.3298	8.771	7.1038	6.934	8.036	7.2774	16.6603	6.3928	13.5964	13.0767	6.315	6.7876	7.0524	8.7074	6.3699
620	9.6451	8.8761	16.6146	9.8453	9.6572	12.8843	9.7533	9.2093	9.662	9.6478	9.7733	14.0765	23.9722	14.2041	13.7053	13.3311	12.7153	9.897	9.6048	9.8218	16.2201	17.5987	11.1568	16.6052	17.0283	13.5536	12.9133	7.0498	8.8466	7.0382	6.7058	7.0625	6.943	6.597	10.3393	8.7275	7.0667	6.9413	8.0246	7.3151	16.581	6.3877	13.5614	13.0872	6.3461	6.7849	7.1222	8.7104	6.3832
621	9.6802	8.9008	16.6342	9.8943	9.7	12.9384	9.7918	9.2344	9.6892	9.6816	9.8293	14.0667	23.9865	14.2385	13.7244	13.3363	12.7511	9.9176	9.6234	9.8437	16.2522	17.5535	11.1608	16.6643	17.051	13.5769	12.9292	7.1206	8.8878	7.0946	6.7772	7.1439	6.9874	6.6516	10.426	8.7666	7.1409	7.0067	8.0981	7.3555	16.5628	6.4228	13.5842	13.1386	6.3964	6.8283	7.1328	8.7652	6.4474
622	9.6835	8.9451	16.6521	9.9268	9.7323	12.9711	9.8339	9.2831	9.7386	9.7647	9.8361	14.0352	24.0462	14.1855	13.6805	13.3168	12.7585	9.9371	9.6002	9.8565	16.2668	17.5471	11.1604	16.6545	17.0379	13.601	12.8975	7.2067	8.9422	7.1676	6.8153	7.1936	7.0337	6.7113	10.4955	8.8466	7.1907	7.0885	8.1937	7.3698	16.6026	6.4462	13.6053	13.2092	6.4145	6.8454	7.1436	8.8036	6.5255
623	9.7086	8.9438	16.6001	9.9195	9.7293	12.9254	9.8217	9.2835	9.7257	9.749	9.8203	14.0495	23.9888	14.1472	13.6594	13.2442	12.7306	9.9184	9.6073	9.8469	16.245	17.5625	11.1648	16.5927	17.0036	13.5484	12.8589	7.2206	8.9442	7.1642	6.798	7.1876	7.0005	6.7398	10.5063	8.8439	7.1955	7.1184	8.1934	7.3741	16.5921	6.4814	13.6362	13.2375	6.448	6.8653	7.1527	8.7933	6.5543
624	9.7007	8.9412	16.5688	9.9043	9.7385	12.9426	9.8099	9.2585	9.7267	9.7122	9.8508	14.066	23.9157	14.1357	13.7026	13.2555	12.711	9.9206	9.6297	9.837	16.2802	17.5575	11.1883	16.6083	17.0006	13.5131	12.8479	7.2205	8.962	7.214	6.7985	7.1641	7.0023	6.761	10.5166	8.9095	7.2057	7.1163	8.1904	7.4022	16.5887	6.5223	13.6407	13.2819	6.4836	6.8661	7.1649	8.8563	6.5457
625	9.6824	8.9324	16.5922	9.9235	9.7652	12.9742	9.8529	9.2309	9.7573	9.7207	9.8392	14.0222	23.9288	14.1226	13.6852	13.2735	12.6851	9.9026	9.6079	9.8371	16.2857	17.5235	11.1789	16.6198	16.9602	13.4734	12.8246	7.2434	8.9988	7.247	6.834	7.1949	6.9942	6.7736	10.5245	8.976	7.229	7.1544	8.2277	7.3621	16.6	6.5156	13.571	13.2839	6.4712	6.8793	7.1657	8.8604	6.5541
626	9.6303	8.9179	16.5321	9.8758	9.7274	12.8817	9.8338	9.2002	9.7076	9.6997	9.7988	13.9589	23.8911	14.1063	13.6403	13.2578	12.6384	9.9111	9.6201	9.8422	16.2734	17.5093	11.1935	16.6155	16.922	13.438	12.7775	7.2537	8.9927	7.1945	6.8164	7.1986	6.9801	6.7887	10.5065	8.9566	7.2362	7.1712	8.2058	7.3667	16.5961	6.4968	13.5669	13.3161	6.4978	6.9212	7.2266	8.8299	6.5866
627	9.6237	8.9329	16.5002	9.8597	9.7115	12.8356	9.8025	9.2141	9.7111	9.6589	9.7619	13.9386	23.8992	14.1038	13.6376	13.2553	12.6557	9.9125	9.6606	9.8296	16.2668	17.4676	11.2214	16.5893	16.9436	13.4485	12.7964	7.2831	8.9793	7.1758	6.8236	7.2005	7.001	6.8253	10.5134	8.9726	7.23	7.1751	8.2398	7.3937	16.6618	6.5207	13.568	13.3212	6.4858	6.9596	7.2245	8.815	6.6108
628	9.6139	8.9183	16.4157	9.8239	9.7107	12.8206	9.7431	9.1834	9.6803	9.6677	9.7201	13.9545	23.8959	14.067	13.6714	13.2565	12.6708	9.9068	9.6899	9.8376	16.2281	17.4854	11.1892	16.5681	16.9704	13.4533	12.7928	7.278	8.9425	7.1971	6.8169	7.1914	7.0354	6.8384	10.5171	8.9634	7.2307	7.1706	8.2579	7.4279	16.6858	6.5332	13.5769	13.3408	6.4925	7.0012	7.2474	8.8597	6.6717
629	9.6179	8.9177	16.4488	9.8238	9.7267	12.8287	9.7573	9.1803	9.7097	9.6814	9.73	13.9787	23.9291	14.0265	13.6794	13.254	12.6902	9.9152	9.6896	9.846	16.2331	17.4765	11.1734	16.5643	16.9653	13.4289	12.7509	7.2827	8.9958	7.2023	6.8117	7.1871	7.0394	6.8581	10.5969	9.0145	7.26	7.2164	8.2936	7.4294	16.6896	6.5304	13.5688	13.3486	6.5506	6.9699	7.2694	8.9013	6.7031
630	9.6665	8.9035	16.4861	9.8478	9.7355	12.869	9.8274	9.2058	9.7435	9.6819	9.7991	14.0063	23.9807	14.0716	13.6861	13.2402	12.7045	9.9552	9.678	9.8996	16.2989	17.485	11.2002	16.6154	16.969	13.4392	12.758	7.2846	9.1122	7.2682	6.8205	7.2426	7.0579	6.8772	10.7417	9.0791	7.3047	7.2556	8.3226	7.4586	16.7186	6.5915	13.5839	13.349	6.6008	6.9796	7.3236	8.9613	6.7624
631	9.6346	8.8716	16.481	9.84	9.7014	12.8363	9.8419	9.2042	9.7492	9.6906	9.7982	13.9961	24.0514	14.0588	13.708	13.2452	12.6763	9.9335	9.706	9.8972	16.2645	17.4146	11.1982	16.6055	16.9572	13.441	12.7799	7.2526	9.1493	7.3232	6.842	7.2311	7.0599	6.8894	10.8264	9.1193	7.2857	7.2419	8.3569	7.4705	16.7011	6.6235	13.5507	13.2999	6.6267	7.0332	7.3593	8.991	6.772
632	9.6404	8.909	16.4794	9.7962	9.6867	12.8296	9.8384	9.1838	9.7555	9.6773	9.7792	13.9976	24.1729	14.0391	13.7002	13.2514	12.6574	9.9076	9.7234	9.8759	16.2789	17.3852	11.2201	16.6541	16.9705	13.4459	12.7537	7.2702	9.1458	7.3081	6.8743	7.2141	7.0511	6.8846	10.8683	9.1465	7.3394	7.2766	8.4246	7.4781	16.7138	6.6396	13.5188	13.3319	6.6416	7.0894	7.376	9.0387	6.7652
633	9.6404	8.9102	16.4953	9.7646	9.6573	12.862	9.8148	9.2077	9.7468	9.6987	9.8129	13.9976	24.1617	14.0635	13.6813	13.2042	12.6347	9.9548	9.6928	9.8898	16.2886	17.3499	11.2244	16.6833	16.9631	13.4258	12.7243	7.2916	9.1594	7.3026	6.9189	7.228	7.0406	6.8688	10.9164	9.1735	7.3599	7.3325	8.4763	7.4702	16.717	6.6362	13.4617	13.3796	6.6621	7.0766	7.3958	9.0097	6.7827
634	9.635	8.8548	16.5509	9.7435	9.6477	12.9068	9.8457	9.2052	9.7629	9.6829	9.8355	14.0164	24.1432	14.0656	13.6392	13.171	12.6122	9.9734	9.7134	9.8986	16.3033	17.3544	11.1796	16.6175	17.0253	13.411	12.7238	7.3421	9.188	7.3654	6.9326	7.2373	7.068	6.83	10.9728	9.2062	7.3528	7.3577	8.5471	7.5059	16.754	6.7139	13.4878	13.4658	6.7122	7.0754	7.443	8.9877	6.8116
635	9.6359	8.8559	16.5496	9.723	9.6771	12.8831	9.8734	9.2083	9.7561	9.6797	9.8313	13.9857	24.1474	14.0302	13.6134	13.1539	12.5873	9.9221	9.7314	9.8551	16.294	17.3213	11.1691	16.6088	17.056	13.3707	12.6653	7.3203	9.2468	7.4119	6.9522	7.2262	7.1155	6.8476	10.9784	9.2654	7.3647	7.3705	8.5995	7.4947	16.7715	6.7608	13.4942	13.5305	6.6887	7.0771	7.447	8.9701	6.8023
636	9.6556	8.8708	16.5408	9.7206	9.6923	12.8579	9.852	9.215	9.728	9.7141	9.8717	14.0604	24.22	14.0311	13.6493	13.1516	12.6602	9.9822	9.798	9.896	16.3549	17.3198	11.2171	16.6686	17.0666	13.4332	12.7026	7.3294	9.2409	7.4201	6.9732	7.274	7.153	6.9001	10.979	9.337	7.3877	7.3895	8.6286	7.586	16.9029	6.8233	13.4989	13.5664	6.7439	7.1632	7.4881	9.0241	6.8814
637	9.6525	8.8626	16.5609	9.696	9.7106	12.9111	9.8466	9.2602	9.7243	9.7189	9.8528	14.0868	24.3334	14.0563	13.6795	13.1636	12.6621	10.0234	9.8625	9.9098	16.4165	17.3843	11.2481	16.7192	17.1132	13.5045	12.7209	7.3705	9.272	7.4441	7.0062	7.3329	7.1507	6.9549	11.0093	9.4096	7.4497	7.4198	8.644	7.5996	16.9943	6.8842	13.4911	13.5818	6.8233	7.2601	7.5073	9.0836	6.9497
638	9.6754	8.9303	16.5675	9.6682	9.6876	12.9193	9.8518	9.2753	9.7653	9.7905	9.8748	14.0677	24.3702	14.0711	13.6597	13.1659	12.6979	10.0432	9.9212	9.9312	16.4065	17.391	11.2275	16.7909	17.1067	13.5295	12.7608	7.404	9.3154	7.4653	7.0326	7.337	7.1866	6.9868	11.0622	9.5082	7.4853	7.4698	8.7244	7.6126	17.0808	6.907	13.5338	13.5888	6.8701	7.2906	7.5864	9.1573	6.9594
639	9.6673	8.911	16.5292	9.6898	9.6318	12.8714	9.8671	9.2433	9.7546	9.7692	9.8863	14.0816	24.45	14.0674	13.6676	13.1678	12.6846	10.0661	9.9323	9.9432	16.3925	17.3084	11.2073	16.8019	17.0889	13.5725	12.768	7.4341	9.2875	7.504	7.0296	7.2979	7.2099	6.972	11.045	9.5663	7.493	7.4649	8.729	7.6553	17.0603	6.9266	13.5575	13.5677	6.8933	7.3018	7.648	9.1776	6.9912
640	9.6897	8.954	16.5626	9.7769	9.678	12.9177	9.9505	9.2542	9.7875	9.8339	9.8864	14.0983	24.4703	14.0497	13.6696	13.1674	12.6868	10.0739	9.8885	9.9148	16.3555	17.2623	11.1673	16.7617	17.068	13.5013	12.7099	7.5099	9.2943	7.5414	7.0751	7.3446	7.2578	7.0145	11.084	9.5783	7.5456	7.487	8.7806	7.6365	17.0501	6.9546	13.536	13.5476	6.9094	7.3196	7.6266	9.1398	7.0249
641	9.626	8.9394	16.534	9.7533	9.6473	12.9143	9.9399	9.2459	9.8177	9.7915	9.8353	14.0588	24.459	14.0171	13.6894	13.1693	12.6699	10.0909	9.8613	9.917	16.3393	17.2185	11.1567	16.7376	17.1065	13.4852	12.6876	7.5116	9.3127	7.545	7.0979	7.3341	7.2451	7.0636	11.1407	9.5884	7.5253	7.4965	8.7872	7.6375	16.9975	6.9605	13.5833	13.5597	6.982	7.3646	7.6551	9.131	7.0921
642	9.7014	8.9609	16.5654	9.7701	9.6355	12.9231	9.9278	9.2379	9.8146	9.7947	9.8545	14.094	24.4909	14.0302	13.7158	13.1605	12.7407	10.1155	9.9116	9.9484	16.388	17.2809	11.2307	16.7819	17.1394	13.561	12.727	7.5426	9.3978	7.6145	7.094	7.3546	7.2564	7.0876	11.1704	9.6009	7.5375	7.5804	8.8396	7.6734	17.0714	7.0048	13.6148	13.6237	7.0245	7.4187	7.6688	9.1757	7.132
643	9.7518	8.9384	16.583	9.7834	9.7184	12.9677	9.9589	9.2403	9.8555	9.8683	9.9062	14.0824	24.5118	14.0516	13.7727	13.1029	12.754	10.1659	9.947	10.0176	16.4276	17.2981	11.3073	16.854	17.2106	13.56	12.7915	7.5703	9.4192	7.694	7.094	7.4051	7.2695	7.1595	11.2526	9.6838	7.5949	7.669	8.8906	7.7475	17.1887	7.0647	13.6054	13.6473	7.0778	7.4251	7.7262	9.247	7.2108
644	9.7913	8.9701	16.6144	9.8447	9.7902	13.0013	10.0098	9.2524	9.9021	9.9456	9.9932	14.1096	24.5858	14.0773	13.814	13.1471	12.7964	10.1815	9.9296	10.0513	16.4694	17.2609	11.308	16.8983	17.2363	13.5769	12.8221	7.6498	9.4555	7.7557	7.1845	7.4909	7.3261	7.2464	11.4224	9.7867	7.6551	7.7343	8.9915	7.8036	17.2117	7.1604	13.6314	13.6389	7.0971	7.4739	7.7821	9.2623	7.224
645	9.8213	9.0008	16.5617	9.826	9.775	12.9773	10.0103	9.2853	9.8807	9.9253	9.9859	14.1787	24.6951	14.1554	13.8067	13.2114	12.8342	10.2431	9.9744	10.1054	16.5466	17.2929	11.299	16.9415	17.294	13.6402	12.8591	7.6928	9.4483	7.7274	7.1973	7.483	7.3436	7.2745	11.5459	9.8127	7.6516	7.7434	9.0519	7.8606	17.1836	7.2156	13.7109	13.7484	7.1423	7.5913	7.8386	9.315	7.2477
646	9.745	8.8855	16.4961	9.7273	9.642	12.87	9.9574	9.2213	9.8366	9.7997	9.9114	14.0925	24.6819	14.0597	13.7421	13.1424	12.797	10.2092	9.9366	10.0504	16.4894	17.1946	11.2171	16.8621	17.2239	13.5826	12.8089	7.6041	9.3811	7.7198	7.0951	7.3891	7.3136	7.1546	11.4885	9.7625	7.5479	7.6702	8.9301	7.829	17.1346	7.1518	13.674	13.7037	7.0624	7.5647	7.7855	9.3331	7.1859
647	9.6808	8.8339	16.5346	9.7066	9.5929	12.7939	9.9406	9.1991	9.8177	9.7869	9.8843	14.0586	24.7184	14.013	13.7783	13.0923	12.7268	10.1548	9.9374	10.0181	16.4294	17.1054	11.2485	16.8582	17.2662	13.5766	12.8003	7.534	9.3584	7.7699	7.1305	7.3671	7.2769	7.1809	11.5108	9.808	7.5541	7.6552	8.9658	7.7701	17.0473	7.1495	13.7239	13.6298	7.0872	7.5269	7.7902	9.3502	7.2162
648	9.6682	8.8731	16.546	9.753	9.5572	12.7772	9.9399	9.2278	9.8533	9.8218	9.8658	14.0181	24.7388	14.017	13.752	13.0388	12.6209	10.1618	9.8836	10.0063	16.3638	17.0445	11.25	16.8353	17.2323	13.5683	12.7754	7.5836	9.3825	7.7446	7.1397	7.3991	7.2591	7.2119	11.5036	9.9336	7.6042	7.7029	9.0184	7.8203	16.9714	7.1504	13.7399	13.6153	7.0903	7.4734	7.792	9.3886	7.2987
649	9.7124	8.8713	16.5141	9.7566	9.5812	12.8171	9.9194	9.2691	9.8309	9.8464	9.9403	13.9923	24.6985	14.0292	13.7801	13.0308	12.6418	10.1625	9.9106	9.9979	16.3243	17.0995	11.2497	16.8479	17.2182	13.519	12.792	7.6621	9.3892	7.7748	7.1442	7.4439	7.3137	7.3128	11.5552	10.0261	7.6286	7.7687	9.0648	7.8256	16.9778	7.1715	13.7534	13.6486	7.1019	7.5091	7.8025	9.4238	7.3239
650	9.7527	8.9372	16.4867	9.7908	9.5835	12.8502	9.9894	9.2877	9.8931	9.9062	10.0041	14.0001	24.6616	14.0104	13.8097	13.0787	12.6872	10.2301	9.9539	10.0258	16.3911	17.0793	11.2849	16.8753	17.2233	13.5027	12.8542	7.7568	9.4708	7.8318	7.2038	7.5412	7.3691	7.3751	11.6534	10.1319	7.7255	7.9047	9.1532	7.8495	17.0316	7.213	13.7907	13.6299	7.1962	7.5927	7.8619	9.4443	7.3539
651	9.7189	8.9353	16.4448	9.7814	9.5253	12.8269	9.9904	9.2667	9.8664	9.9453	9.9985	14.0369	24.6474	13.9626	13.7711	13.0578	12.6592	10.2568	9.9493	10.0207	16.4489	17.0461	11.3167	16.8356	17.2297	13.5017	12.8507	7.7325	9.5747	7.8507	7.2687	7.5274	7.3711	7.3227	11.6613	10.1258	7.7011	7.9053	9.1109	7.8802	16.9949	7.2664	13.8171	13.6073	7.2383	7.6504	7.8914	9.4549	7.3897
652	9.7534	8.9512	16.3964	9.7715	9.5327	12.8347	9.9807	9.3289	9.8341	9.9316	10.0482	14.0528	24.7446	13.9913	13.8273	13.0696	12.6752	10.2655	9.9954	10.0312	16.5093	17.0995	11.3601	16.8651	17.2416	13.5262	12.8785	7.7148	9.5891	7.9244	7.2655	7.5257	7.3644	7.3415	11.6615	10.173	7.7471	7.9122	9.089	7.9454	17.0936	7.3036	13.8367	13.7068	7.2782	7.724	7.9383	9.5166	7.4658
653	9.754	8.9387	16.4294	9.8001	9.5978	12.8812	10.0811	9.3742	9.8939	9.9537	10.1121	14.0359	24.8024	13.9542	13.8464	13.0539	12.653	10.3282	9.985	10.0538	16.4649	17.1184	11.3208	16.9406	17.2452	13.5261	12.8464	7.7535	9.6333	8.0358	7.2729	7.5601	7.4842	7.4744	11.7129	10.2883	7.8299	7.8998	9.1671	7.886	17.1478	7.3672	13.7788	13.6872	7.3168	7.7366	7.9253	9.4514	7.4229
654	9.8018	8.936	16.4156	9.8905	9.6124	12.8961	10.087	9.3635	9.9433	10.0104	10.1774	14.0219	24.7849	13.9594	13.749	13.0125	12.6127	10.3573	9.9636	10.0426	16.4595	17.1016	11.3437	17.0045	17.2654	13.52	12.7637	7.7932	9.6747	8.1002	7.3186	7.6353	7.5964	7.5032	11.8152	10.3557	7.8902	8.008	9.2447	7.8694	17.1165	7.335	13.7137	13.7056	7.3168	7.7129	7.9546	9.4006	7.4082
655	9.7907	8.907	16.2988	9.8979	9.628	12.9633	10.0718	9.3503	9.9687	9.9988	10.1941	14.041	24.7876	13.9975	13.6901	13.0433	12.6636	10.3065	9.9388	10.0331	16.4936	17.011	11.3753	17.0116	17.3553	13.5027	12.8198	7.8182	9.6759	8.1058	7.3525	7.6622	7.5796	7.4816	11.8035	10.3316	7.9048	8.0724	9.2454	7.9291	17.1048	7.3501	13.7384	13.7141	7.2868	7.7295	8.0135	9.488	7.4424
656	9.7596	8.9657	16.2423	9.792	9.5933	12.9222	9.9855	9.3323	9.939	9.9448	10.1424	14.1055	24.8665	14.0195	13.8069	13.0933	12.7243	10.3387	10.0136	10.0677	16.5506	17.115	11.4064	17.027	17.3551	13.5292	12.8787	7.8353	9.6356	8.0448	7.251	7.6296	7.5003	7.4428	11.7568	10.2614	7.8977	8.0249	9.221	7.9462	17.1579	7.3709	13.8446	13.8119	7.3353	7.7773	8.0604	9.5393	7.5642
657	9.7341	9.0038	16.2801	9.7962	9.57	12.8424	9.9441	9.3547	9.9349	10.0504	10.1801	14.2082	24.9756	14.0837	13.885	13.1342	12.7319	10.491	10.1628	10.1695	16.5575	17.2114	11.4802	17.1476	17.3948	13.6323	12.9987	7.8352	9.7131	8.0735	7.355	7.5721	7.5419	7.5631	11.8299	10.2999	7.8795	8.0636	9.2871	8.076	17.3228	7.5061	13.9508	13.9562	7.5047	7.918	8.1533	9.6465	7.6699
658	9.6882	9.0147	16.2926	9.8086	9.5976	12.846	10.0019	9.4007	10.0413	10.0054	10.1591	14.2329	24.971	14.138	13.9201	13.166	12.7215	10.5641	10.143	10.2024	16.5405	17.1393	11.5216	17.1622	17.403	13.6485	13.0496	7.8306	9.77	8.1018	7.3633	7.5841	7.5011	7.5774	11.924	10.3083	7.9306	8.1262	9.3135	8.1513	17.3365	7.6296	14.0185	13.9951	7.5613	8.0005	8.2124	9.7521	7.7197
659	9.761	9.0438	16.3165	9.8092	9.6079	12.8954	10.0946	9.409	10.1011	10.0539	10.1947	14.1907	24.9212	14.1572	13.899	13.1261	12.7005	10.5588	10.1374	10.2143	16.4359	17.0991	11.5173	17.192	17.3649	13.6208	12.997	7.8514	9.8366	8.1366	7.3757	7.6795	7.5833	7.6022	12.0901	10.3692	7.9534	8.1797	9.393	8.1827	17.262	7.6537	14.044	13.9867	7.5719	8.0397	8.2494	9.7863	7.764
660	9.7723	9.0547	16.2861	9.8151	9.6324	12.8506	10.0931	9.3739	10.0466	10.0649	10.1852	14.2008	24.848	14.0838	13.8552	13.0941	12.6803	10.4886	10.1652	10.2172	16.4511	17.0597	11.5236	17.1749	17.3931	13.6104	12.9735	7.9577	9.7766	8.1373	7.4042	7.7446	7.6116	7.6015	12.2107	10.4651	7.9221	8.1307	9.3601	8.1272	17.1594	7.6118	14.056	13.918	7.6024	8.0114	8.2432	9.78	7.8023
661	9.7525	9.0223	16.3238	9.8461	9.6351	12.8024	10.0861	9.4498	10.0164	10.1022	10.1713	14.1581	24.73	14.0047	13.7301	13.0428	12.5822	10.4193	10.1298	10.1498	16.4283	17.0082	11.4723	17.0826	17.2873	13.4938	12.86	8.099	9.805	8.181	7.4228	7.7818	7.6255	7.6125	12.2204	10.5678	7.9396	8.1736	9.3418	8.0929	17.1925	7.6013	13.9271	13.8548	7.5687	7.9864	8.1966	9.7833	7.7812
662	9.8027	9.1371	16.4003	9.9181	9.6794	12.8237	10.1659	9.5422	10.041	10.1683	10.2425	14.0735	24.7613	14.0478	13.7837	13.017	12.63	10.5072	10.159	10.0836	16.4455	16.9455	11.4654	17.0629	17.2694	13.4771	12.9145	8.1298	9.9245	8.2994	7.4747	7.8781	7.7328	7.7225	12.3187	10.6616	8.0876	8.3128	9.475	8.1977	17.2925	7.6823	13.957	13.8997	7.6065	8.0508	8.1902	9.8016	7.7995
663	9.807	9.1669	16.5087	9.9149	9.6613	12.8198	10.1937	9.5204	10.0509	10.2205	10.3081	14.0976	24.8988	14.1309	13.9239	13.072	12.7271	10.5783	10.2394	10.1848	16.5414	16.8829	11.517	17.1739	17.4579	13.4974	13.0006	8.0383	9.9137	8.3153	7.5159	7.8443	7.7992	7.7586	12.4331	10.7947	8.132	8.3899	9.512	8.3033	17.3593	7.763	14.0122	13.9804	7.6916	8.116	8.2813	9.8421	7.8441
664	9.8194	9.1776	16.5179	9.8483	9.7093	12.8365	10.2559	9.4835	10.0327	10.2699	10.3826	14.1946	25.0109	14.2119	14.0221	13.1552	12.8021	10.6188	10.2777	10.2877	16.5843	16.9019	11.5937	17.3398	17.6167	13.5904	13.1009	8.0425	9.9254	8.3315	7.5206	7.869	7.7944	7.7922	12.5234	10.8931	8.1308	8.4455	9.5532	8.344	17.4108	7.7933	14.0873	14.1044	7.7584	8.242	8.4055	9.9525	7.9647
665	9.8263	9.2385	16.5527	9.8946	9.7561	12.8941	10.3539	9.5254	10.1827	10.3415	10.4283	14.2471	24.9881	14.2111	14.062	13.1656	12.8025	10.6556	10.2497	10.3235	16.5934	16.9691	11.7218	17.4826	17.6968	13.6241	13.1648	8.1272	10.0338	8.3956	7.6501	7.906	7.799	7.9487	12.5404	10.9343	8.1696	8.4769	9.7015	8.3917	17.4424	7.8501	14.1902	14.1134	7.8268	8.2714	8.4657	10.0432	8.0355
666	9.828	9.265	16.5966	9.9901	9.7385	12.902	10.3817	9.5728	10.1585	10.4111	10.4598	14.224	24.8947	14.1808	13.9872	13.091	12.7045	10.6227	10.1844	10.2728	16.5659	16.8865	11.6189	17.3554	17.624	13.5512	13.0292	8.2022	10.1784	8.4718	7.616	7.9311	7.7934	8.0102	12.514	10.9207	8.1654	8.4689	9.8203	8.3577	17.3661	7.7816	14.0805	14.0556	7.7563	8.1871	8.4556	9.9748	7.974
667	9.8686	9.2472	16.49	10.0365	9.6475	12.9223	10.288	9.5579	10.058	10.4136	10.4509	14.2056	24.8777	14.105	13.874	13.0725	12.6209	10.5969	10.2014	10.2923	16.5153	16.8829	11.5291	17.2515	17.4644	13.5205	12.9215	8.2287	10.1526	8.4312	7.6147	7.8728	7.7778	7.9395	12.4178	10.899	8.0796	8.4089	9.8348	8.3298	17.2791	7.7884	13.922	13.999	7.7009	8.1708	8.4582	9.9042	7.962
668	9.8525	9.2592	16.4879	10.012	9.7293	12.8958	10.3575	9.5954	10.0959	10.4134	10.4728	14.2464	24.9001	14.1177	13.8371	13.0768	12.5876	10.593	10.2559	10.2329	16.5066	16.8386	11.5858	17.3156	17.4851	13.5006	12.9401	8.2932	10.1988	8.4459	7.5755	7.8695	7.7701	8.0207	12.3472	10.9803	8.1442	8.4943	9.8452	8.3209	17.2557	7.7897	13.8726	13.9676	7.7472	8.256	8.4335	9.918	7.9715
669	9.8687	9.2461	16.4166	9.8927	9.7123	12.8434	10.2927	9.5181	10.1362	10.3459	10.4142	14.2505	24.8773	14.1829	13.839	13.0085	12.6133	10.6548	10.2486	10.2157	16.5427	16.8218	11.5833	17.3025	17.5035	13.4869	12.9739	8.2654	10.2518	8.4481	7.595	7.8817	7.8162	7.9995	12.3751	11.0059	8.1487	8.5016	9.7822	8.3641	17.2407	7.8622	13.8806	14.0366	7.838	8.3152	8.4556	9.9881	8.0462
670	9.9042	9.249	16.4829	9.854	9.7764	12.9325	10.3014	9.5782	10.2001	10.3984	10.4986	14.2117	24.9121	14.117	13.8753	12.9782	12.6138	10.6219	10.2109	10.2288	16.453	16.7744	11.5159	17.2125	17.5059	13.4218	12.9373	8.395	10.3338	8.5317	7.6586	7.9728	7.9196	8.0416	12.4665	10.9942	8.2124	8.5386	9.8888	8.3691	17.2175	7.8883	13.9649	14.0327	7.8504	8.2695	8.4965	10.052	8.0423
671	9.9275	9.279	16.4632	9.9468	9.8099	12.912	10.3511	9.6371	10.1795	10.4659	10.5776	14.2814	24.9412	14.0654	13.9158	13.0213	12.5902	10.6396	10.2334	10.2425	16.3505	16.8613	11.5147	17.2444	17.5281	13.4273	12.9392	8.4997	10.4554	8.6398	7.7186	8.06	7.9915	8.1467	12.5166	10.9813	8.2527	8.6467	10.0077	8.3666	17.2146	7.9362	14.0439	14.0745	7.848	8.2844	8.5336	10.1301	8.1283
672	9.8719	9.2214	16.388	9.8954	9.7227	12.81	10.3577	9.557	10.0956	10.4347	10.5051	14.28	24.9291	14.0746	13.9546	13.025	12.6152	10.5959	10.2348	10.2815	16.3264	16.8842	11.5206	17.2724	17.5397	13.5017	12.9674	8.4177	10.4833	8.5607	7.7057	8.0031	7.9197	8.0778	12.4725	10.999	8.3123	8.6301	9.9155	8.4532	17.2935	7.9498	14.0527	14.1841	7.9079	8.3579	8.5986	10.1461	8.1911
673	9.9384	9.208	16.3691	9.8506	9.6978	12.8054	10.3722	9.5976	10.1033	10.4128	10.4909	14.2904	24.9644	14.0828	14.0158	12.8999	12.5825	10.566	10.2197	10.2498	16.2894	16.8428	11.5066	17.3029	17.5592	13.518	12.9925	8.3342	10.4812	8.532	7.7113	7.9518	7.962	8.0199	12.5513	11.0421	8.3197	8.6592	9.982	8.4512	17.3817	8.006	14.0663	14.2211	7.9035	8.4218	8.6081	10.1301	8.1776
674	9.9258	9.2338	16.3969	9.881	9.7357	12.8306	10.4257	9.5935	10.1788	10.386	10.4212	14.3541	25.015	14.1775	14.0877	13.0181	12.63	10.6116	10.2634	10.3317	16.3323	16.8712	11.5445	17.3292	17.597	13.6026	13.0862	8.3724	10.4443	8.5858	7.7593	7.9498	8.0092	8.036	12.6136	11.1301	8.3744	8.6618	10.0692	8.535	17.4897	8.0775	14.0908	14.278	8.0147	8.5052	8.6778	10.1835	8.2244
675	9.9127	9.2693	16.3763	9.9078	9.7193	12.7979	10.4994	9.6117	10.2014	10.4165	10.3962	14.3783	25.0081	14.2544	14.0831	13.1029	12.7032	10.6728	10.2672	10.413	16.4359	16.8731	11.6094	17.2968	17.6528	13.683	13.1065	8.4705	10.413	8.6316	7.7852	8.0078	8.0247	8.0686	12.7294	11.142	8.341	8.6793	10.0927	8.5929	17.6376	8.0796	14.0828	14.3583	8.1253	8.535	8.7878	10.2642	8.3413
676	9.9093	9.3557	16.3145	9.9484	9.723	12.7649	10.4513	9.6053	10.1493	10.4581	10.4678	14.4014	25.0212	14.2502	14.1343	13.1291	12.7291	10.6788	10.332	10.4234	16.5154	16.8961	11.6871	17.3504	17.7204	13.6832	13.1672	8.4867	10.4879	8.668	7.7704	8.0224	8.0246	8.1037	12.8608	11.1782	8.307	8.7737	10.0906	8.614	17.6556	8.1559	14.0943	14.388	8.089	8.603	8.8165	10.3411	8.4213
677	9.9631	9.3569	16.2673	9.9712	9.716	12.7757	10.3992	9.6705	10.1205	10.4812	10.5154	14.4349	25.0994	14.2355	14.0776	13.1257	12.6587	10.715	10.3082	10.3843	16.468	16.8842	11.6217	17.3159	17.7506	13.6378	13.1543	8.4825	10.4964	8.6513	7.7487	8.1014	8.0756	8.1258	12.9432	11.2011	8.3274	8.7716	10.1362	8.631	17.5834	8.1731	14.0509	14.3876	8.0919	8.5722	8.7969	10.3195	8.3855
678	9.9596	9.34	16.2703	9.9079	9.6795	12.763	10.3515	9.7101	10.0429	10.454	10.5135	14.4509	25.1659	14.2764	14.0329	13.1006	12.6486	10.7183	10.2659	10.4153	16.446	16.9489	11.5773	17.3031	17.7473	13.6421	13.097	8.5291	10.515	8.6893	7.7766	8.1029	8.0782	8.2161	12.9245	11.2202	8.3609	8.7962	10.1771	8.641	17.6063	8.1842	14.0661	14.3556	8.1313	8.6211	8.7469	10.3414	8.3946
679	9.8649	9.2296	16.2601	9.8881	9.7041	12.6336	10.2845	9.6606	9.9515	10.3651	10.5077	14.3775	25.2959	14.2805	14.0084	13.0609	12.6434	10.7241	10.2305	10.3899	16.3626	16.9109	11.5802	17.3115	17.7966	13.7283	13.0232	8.4771	10.5211	8.6498	7.739	8.0511	8.0325	8.2036	12.8346	11.1848	8.2823	8.755	10.1887	8.6248	17.5924	8.1246	14.0643	14.3238	8.1359	8.6423	8.7958	10.2892	8.4117
680	9.9106	9.2177	16.2694	9.969	9.8146	12.6484	10.3243	9.7067	10.0535	10.3793	10.5708	14.3538	25.3777	14.3371	14.0805	13.1061	12.6829	10.7089	10.3321	10.4008	16.4423	16.9279	11.665	17.3358	17.79	13.7862	13.0494	8.5114	10.651	8.7242	7.7624	8.1019	8.0636	8.2131	12.8403	11.2689	8.326	8.7965	10.2747	8.674	17.6433	8.2104	14.1217	14.3976	8.2156	8.6648	8.8692	10.3769	8.4277
681	9.9196	9.2186	16.2995	9.9893	9.8275	12.6946	10.3268	9.7479	10.1361	10.4402	10.5993	14.4219	25.4007	14.3835	14.1127	13.1203	12.665	10.7417	10.3848	10.4186	16.4115	16.959	11.7229	17.3805	17.7373	13.7909	13.0696	8.5691	10.7155	8.7861	7.7854	8.145	8.1198	8.1546	12.8214	11.3759	8.4042	8.7826	10.3613	8.723	17.7476	8.1955	14.2443	14.4276	8.1662	8.6549	8.8476	10.4729	8.4792
682	9.9914	9.3116	16.4657	10.0332	9.9064	12.7896	10.4152	9.7255	10.1941	10.5835	10.6371	14.4274	25.4835	14.3909	14.1107	13.0636	12.6752	10.7398	10.4065	10.4455	16.3876	16.9259	11.7496	17.3699	17.75	13.7525	13.072	8.6932	10.7686	8.8417	7.86	8.175	8.1936	8.1893	12.8499	11.4341	8.4698	8.8502	10.3873	8.726	17.7882	8.1953	14.3339	14.4823	8.197	8.6762	8.8865	10.4727	8.5615
683	10.0891	9.4164	16.4946	10.0521	10.0123	12.8901	10.4804	9.7009	10.1989	10.6365	10.6131	14.3847	25.4147	14.3845	14.0948	13.0217	12.6558	10.7295	10.372	10.4799	16.4002	16.8929	11.6693	17.2934	17.7105	13.7537	13.0568	8.7246	10.8584	8.8755	7.9126	8.3281	8.2904	8.2732	12.8582	11.481	8.4218	8.8737	10.4966	8.7473	17.7575	8.1977	14.2977	14.4893	8.255	8.7354	8.9121	10.5285	8.6049
684	10.1508	9.5344	16.4691	10.1166	10.0725	12.9101	10.5146	9.8052	10.2672	10.6184	10.6508	14.3937	25.4047	14.438	14.1676	13.1764	12.7173	10.7519	10.4047	10.4754	16.4125	16.9818	11.7107	17.3287	17.6808	13.8103	13.1303	8.7661	10.9097	9.034	7.9303	8.4187	8.3921	8.408	12.9461	11.4585	8.3989	8.9542	10.603	8.8052	17.7787	8.2785	14.3535	14.5933	8.3529	8.8442	8.9716	10.56	8.6669
685	10.1598	9.5067	16.4106	10.1167	10.0056	12.7678	10.4057	9.8167	10.2674	10.519	10.6804	14.4664	25.4528	14.4999	14.1931	13.2783	12.7183	10.8339	10.4678	10.5618	16.4075	17.0353	11.765	17.3903	17.8233	13.8486	13.2057	8.7807	10.9188	9.0376	7.8877	8.3244	8.3422	8.411	12.9516	11.4803	8.4426	8.9267	10.5771	8.8795	17.8512	8.3877	14.447	14.7357	8.4431	8.8972	9.0509	10.6229	8.8303
686	10.2112	9.5025	16.4882	10.1182	10.0516	12.793	10.391	9.824	10.2873	10.4797	10.7162	14.4514	25.5032	14.4064	14.1195	13.1863	12.6784	10.8237	10.4138	10.4999	16.3257	16.989	11.738	17.4605	17.8091	13.8434	13.1451	8.8718	10.9649	9.0394	7.9918	8.3409	8.3067	8.4195	12.9994	11.6363	8.5061	9.0001	10.6227	8.8535	17.8796	8.4202	14.4852	14.7081	8.4064	8.9005	9.0399	10.661	8.8137
687	10.2175	9.5476	16.527	10.1942	10.1442	12.9293	10.5355	9.8761	10.3723	10.6115	10.8237	14.5127	25.6626	14.4255	14.1125	13.2226	12.7226	10.8694	10.448	10.5424	16.4097	17.0313	11.7809	17.5016	17.8675	13.8687	13.1426	8.9664	11.0182	9.1221	8.0626	8.4216	8.4422	8.5358	13.2295	11.7978	8.569	9.1227	10.7012	8.9023	17.9136	8.4507	14.4846	14.7013	8.4762	8.9429	9.0959	10.6924	8.8308
688	10.1999	9.5719	16.4576	10.2264	10.138	12.8911	10.6226	9.8945	10.3471	10.717	10.8317	14.558	25.677	14.4759	14.0996	13.2506	12.7643	10.9853	10.509	10.6267	16.4458	17.1103	11.9265	17.4895	17.8951	13.9439	13.1949	8.982	11.0484	9.1687	8.0811	8.4706	8.4819	8.5587	13.3673	11.8305	8.6101	9.1475	10.7251	9.0489	17.9474	8.5136	14.5004	14.7116	8.5481	9.0219	9.2654	10.6931	8.9416
689	10.3408	9.6083	16.4983	10.308	10.191	12.9167	10.6958	9.9886	10.3948	10.8274	10.8532	14.5157	25.7871	14.4827	14.2187	13.2668	12.8638	11.0312	10.5929	10.7343	16.476	17.107	11.9468	17.5304	17.9297	13.9381	13.2658	9.0166	11.1391	9.318	8.1584	8.5409	8.5918	8.625	13.5364	11.9816	8.7275	9.2391	10.874	9.1763	17.972	8.64	14.5499	14.7675	8.5911	9.0973	9.3385	10.8359	9.009
690	10.4283	9.638	16.5291	10.3353	10.2302	12.9544	10.7618	10.0492	10.4837	10.9239	10.9479	14.5016	25.796	14.551	14.3322	13.2722	12.9011	11.0274	10.5872	10.7691	16.5151	17.1172	11.9306	17.528	17.9312	14.0273	13.2941	9.1101	11.2543	9.326	8.1991	8.6475	8.6777	8.7224	13.6773	12.1191	8.7925	9.3569	10.9615	9.1685	17.9976	8.6683	14.6117	14.896	8.6461	9.1162	9.3499	10.9843	9.0876
691	10.4836	9.6711	16.5381	10.3572	10.3373	12.9682	10.8491	10.1741	10.5108	10.9381	10.9962	14.588	25.8121	14.6081	14.3355	13.3027	12.8627	11.0282	10.6065	10.7726	16.5022	17.0813	11.9183	17.5291	17.897	14.0574	13.3324	9.2063	11.3612	9.3375	8.265	8.6893	8.7117	8.8306	13.8397	12.1264	8.8705	9.3814	11.0091	9.2051	17.976	8.6891	14.6504	14.9655	8.6823	9.1427	9.3938	11.0287	9.1339
692	10.4685	9.729	16.5349	10.4358	10.452	12.9992	10.8299	10.2487	10.5673	10.8898	10.9596	14.6787	25.9328	14.6137	14.2975	13.3839	12.9394	11.0701	10.7158	10.7659	16.5546	17.1046	11.9629	17.6132	17.9606	14.0961	13.3723	9.2505	11.3694	9.3327	8.2897	8.6486	8.6936	8.809	13.9312	12.1078	8.8736	9.3958	11.0792	9.2319	17.9492	8.712	14.6232	14.986	8.7118	9.1749	9.4	11.0733	9.1651
693	10.4533	9.8123	16.5682	10.4792	10.508	13.1129	10.9161	10.2942	10.6533	10.9453	11.0971	14.6486	26.0528	14.5512	14.2465	13.4134	12.9997	11.0844	10.7218	10.7544	16.4925	17.1869	12.0031	17.6935	17.9744	14.1718	13.3673	9.2713	11.3931	9.439	8.3299	8.7892	8.7584	8.8632	13.9851	12.2328	8.9547	9.4426	11.1203	9.2345	17.9733	8.7541	14.5977	14.9924	8.7518	9.2281	9.4947	11.1264	9.2372
694	10.4459	9.817	16.5652	10.3843	10.4392	13.0726	10.8692	10.2302	10.6301	10.9735	11.0784	14.5458	26.237	14.5892	14.2669	13.3705	12.985	11.1015	10.7062	10.7903	16.4866	17.1207	12.0687	17.6264	17.966	14.1601	13.3329	9.2449	11.3498	9.429	8.3126	8.7738	8.7889	8.8374	13.913	12.3003	8.9129	9.453	11.0194	9.2641	17.958	8.7922	14.6741	15.0031	8.771	9.2398	9.5588	11.1478	9.2291
695	10.4464	9.7665	16.6395	10.3537	10.3729	13.0541	10.8665	10.1455	10.6451	10.9471	11.0372	14.4801	26.3362	14.5974	14.2465	13.3905	12.9239	11.0595	10.7494	10.7703	16.5015	17.0933	12.0107	17.587	17.9366	14.0648	13.3174	9.2605	11.3986	9.3816	8.3848	8.722	8.7444	8.8416	13.8922	12.256	8.9166	9.437	10.9976	9.2878	18.0254	8.7977	14.6881	15.009	8.7445	9.252	9.5563	11.1478	9.1659
696	10.4783	9.7957	16.6422	10.3672	10.3596	13.0727	10.8249	10.2287	10.6305	10.9067	11.054	14.5043	26.4787	14.6237	14.4	13.4804	12.9602	11.1818	10.8428	10.8132	16.5654	17.1534	12.1415	17.7374	18.0459	14.1769	13.4307	9.2669	11.3908	9.4368	8.3646	8.6858	8.7599	8.8511	13.9253	12.2907	8.9596	9.4677	11.0566	9.3165	18.1331	8.8655	14.7643	15.0496	8.8549	9.3311	9.5762	11.1461	9.2681
697	10.4182	9.7468	16.5935	10.3915	10.2754	13.0342	10.8404	10.2869	10.5336	10.9151	11.0378	14.5074	26.6411	14.7248	14.454	13.5203	13.0231	11.2585	10.7994	10.8911	16.5858	17.2056	12.1648	17.7339	18.0656	14.2064	13.5029	9.2217	11.3342	9.5078	8.3146	8.6775	8.7626	8.8792	13.8942	12.3802	8.8274	9.4043	11.0915	9.305	18.1504	8.9058	14.7438	15.1166	8.9109	9.4182	9.5726	11.1216	9.3406
698	10.4143	9.77	16.484	10.4569	10.3891	12.9984	10.8497	10.2949	10.5909	10.9905	10.9951	14.5368	26.6609	14.8052	14.4179	13.4943	13.0424	11.2612	10.892	10.9602	16.5805	17.1868	12.0437	17.7776	18.0998	14.2101	13.4987	9.2852	11.3978	9.4867	8.3784	8.7825	8.7825	8.9495	13.8528	12.4878	8.8482	9.4635	11.0477	9.2727	18.0905	8.9983	14.7703	15.0822	8.9588	9.4528	9.6291	11.1983	9.4121
699	10.5295	9.7973	16.4675	10.5013	10.4251	12.9865	10.879	10.3167	10.6433	10.9698	11.0431	14.5434	26.5725	14.8138	14.4254	13.4169	13.0371	11.291	10.8873	11.0254	16.4929	17.2303	12.0981	17.7922	18.0758	14.1666	13.5159	9.3257	11.4446	9.552	8.453	8.837	8.8077	9.0085	13.8037	12.6013	8.8848	9.4959	10.9969	9.3325	18.0998	9.0159	14.7796	15.1074	9.067	9.4714	9.7051	11.2923	9.4492
700	10.5807	9.8551	16.4511	10.5026	10.44	13.0184	10.9574	10.3204	10.709	11.0411	11.1488	14.6727	26.7156	14.8108	14.4962	13.5866	13.0856	11.4174	10.9477	11.1515	16.5722	17.346	12.2573	17.8971	18.166	14.2541	13.5911	9.3398	11.5157	9.6159	8.4891	8.8926	8.8342	9.0673	13.8414	12.6456	8.9867	9.5991	11.0918	9.4493	18.1212	9.0621	14.8768	15.2226	9.1092	9.5774	9.7981	11.3887	9.5272
701	10.7525	10.0907	16.5749	10.5686	10.6304	13.1732	11.1235	10.4743	10.8734	11.1662	11.4123	14.8136	26.7637	14.7605	14.5188	13.6833	13.1848	11.497	11.0302	11.2019	16.6185	17.345	12.3491	18.0489	18.0795	14.2931	13.6991	9.4698	11.7208	9.7901	8.6367	8.9735	8.9894	9.2258	14.0797	12.8084	9.1475	9.7924	11.3141	9.5557	18.1538	9.0976	14.8741	15.2646	9.1985	9.6731	9.8843	11.4355	9.6211
702	10.7157	10.0534	16.556	10.5272	10.7044	13.2279	11.1445	10.5627	10.8785	11.1885	11.4707	14.8067	26.8591	14.8181	14.5194	13.5909	13.2128	11.4836	11.0317	11.1543	16.622	17.315	12.3206	17.9085	18.053	14.3481	13.7401	9.4908	11.7299	9.7422	8.6424	9.0052	9.071	9.2041	14.1693	12.8592	9.1223	9.8619	11.3349	9.5501	18.1992	9.0623	14.8312	15.2645	9.1683	9.6428	9.828	11.4879	9.6389
703	10.7154	9.8932	16.5939	10.576	10.6907	13.1067	11.1101	10.5281	10.7989	11.1379	11.4436	14.8059	26.8586	14.8951	14.6177	13.6123	13.2247	11.5037	11.0533	11.2106	16.5871	17.2915	12.3466	17.9607	18.1718	14.4573	13.7997	9.4237	11.6317	9.6954	8.5917	8.9873	9.1054	9.1314	14.2552	12.891	9.1108	9.7987	11.3262	9.4909	18.2851	9.1344	14.8556	15.3574	9.1427	9.6704	9.9023	11.5473	9.7493
704	10.7424	9.8698	16.5033	10.6066	10.5756	13.034	11.0735	10.5531	10.8728	11.1542	11.4694	14.8853	26.743	14.9339	14.6806	13.6846	13.2994	11.5899	11.0464	11.2004	16.6075	17.3554	12.3704	17.9881	18.194	14.5095	13.7789	9.3768	11.5614	9.6944	8.5985	8.9623	9.1097	9.1525	14.3367	12.9066	9.2541	9.7421	11.3432	9.5136	18.2224	9.2186	14.8842	15.4153	9.2101	9.6464	10.001	11.5297	9.8176
705	10.7121	10.0068	16.5439	10.5873	10.6492	13.0824	11.2328	10.6584	11.0108	11.2887	11.5497	14.8921	26.8173	14.9374	14.638	13.7836	13.2827	11.5904	10.9704	11.1745	16.6171	17.3943	12.4585	17.9733	18.1995	14.4545	13.7755	9.5092	11.6277	9.77	8.7376	9.0273	9.2098	9.2076	14.5345	12.9696	9.2923	9.7801	11.3679	9.585	18.0897	9.2502	14.9568	15.4263	9.3241	9.678	10.0049	11.451	9.8552
706	10.7775	10.0508	16.5916	10.6915	10.8316	13.1387	11.3769	10.7635	11.1662	11.4058	11.6764	14.9305	26.9478	14.9001	14.495	13.7464	13.3586	11.5437	11.0145	11.2174	16.638	17.3561	12.4888	18.0813	18.2304	14.4389	13.8543	9.6393	11.7893	9.982	8.8745	9.162	9.2998	9.3686	14.7302	13.0925	9.364	9.9712	11.4701	9.5893	18.127	9.3127	14.9769	15.3413	9.4018	9.726	10.0487	11.5216	9.8896
707	10.6972	10.0746	16.4622	10.7581	10.7507	13.0643	11.3817	10.8325	11.053	11.357	11.6587	15.0655	27.1726	15.0461	14.6686	13.8706	13.4802	11.6648	11.1631	11.3825	16.6895	17.4465	12.5929	18.1897	18.3067	14.5904	13.9973	9.6008	11.8154	9.9591	8.8367	9.164	9.2492	9.4109	14.9015	13.0971	9.2808	9.9252	11.5361	9.7496	18.2592	9.4495	15.1073	15.4868	9.4647	9.8904	10.1822	11.7693	9.9953
708	10.8191	10.222	16.5703	10.8475	10.8719	13.2814	11.5303	10.9353	11.158	11.5763	11.7894	15.1735	27.3413	15.1534	14.8992	14.0451	13.6575	11.9848	11.2832	11.6314	16.7818	17.6397	12.7843	18.3524	18.3781	14.7558	14.1809	9.6915	11.7885	10.1091	8.9123	9.3451	9.3227	9.5896	15.1459	13.3524	9.4234	10.114	11.7309	9.9081	18.4208	9.5995	15.1249	15.5851	9.7051	10.1485	10.3218	11.8872	10.1211
709	10.8938	10.2811	16.6097	10.9053	10.9102	13.3483	11.6315	10.9636	11.2438	11.6923	11.8524	15.0986	27.3844	15.0137	14.8965	13.9899	13.61	11.9543	11.2283	11.6198	16.6692	17.4493	12.7972	18.2981	18.342	14.7162	14.2037	9.8038	11.823	10.1522	9.0033	9.3597	9.3448	9.7345	15.1204	13.4372	9.5417	10.2133	11.8071	9.9681	18.2783	9.566	15.0319	15.5218	9.6839	10.1296	10.3236	11.7338	10.0237
710	11.0046	10.305	16.6002	10.9215	10.7696	13.3242	11.5568	10.9776	11.24	11.5964	11.8261	15.1399	27.4416	15.063	14.904	13.9357	13.5145	11.9405	11.3601	11.7118	16.8148	17.4669	12.835	18.3013	18.5296	14.8566	14.1999	9.7735	11.8419	10.1598	9.0164	9.3664	9.3065	9.7106	15.0539	13.4546	9.6124	10.2152	11.7796	10.0084	18.2334	9.601	15.1613	15.6107	9.7825	10.1889	10.436	11.8778	10.1605
711	11.1521	10.4046	16.6759	11.0121	10.9494	13.4203	11.5559	11.0737	11.2937	11.6473	11.8697	15.332	27.6608	15.3343	15.122	14.1468	13.7134	11.9647	11.588	11.9262	17.0242	17.6861	13.0383	18.3771	18.6766	15.0865	14.372	9.7654	11.9421	10.2358	9.1034	9.4466	9.3907	9.7466	15.0729	13.4426	9.6231	10.2946	11.8052	10.0786	18.4377	9.796	15.4365	15.8395	9.9112	10.2583	10.7509	12.1192	10.3179
712	11.2177	10.5012	16.8626	11.1357	11.0562	13.5927	11.6423	11.1881	11.4814	11.7444	11.9782	15.5187	27.7147	15.4931	15.2698	14.3122	13.921	12.2628	11.692	11.9751	17.0402	17.9088	13.2403	18.5904	18.8386	15.1756	14.6249	9.9759	11.9639	10.2928	9.2721	9.5946	9.4833	9.9265	15.031	13.5717	9.7175	10.4667	11.8496	10.1937	18.5208	9.9309	15.5328	15.9904	10.071	10.401	10.7855	12.1773	10.4725
713	11.2867	10.6033	16.9621	11.1927	11.2457	13.739	11.7174	11.2867	11.5853	11.9369	12.1587	15.5418	27.8384	15.5237	15.3187	14.398	13.9499	12.4535	11.767	11.9048	17.0834	17.9001	13.2086	18.7815	18.8663	15.2573	14.7327	10.1598	12.0367	10.4503	9.4587	9.7385	9.6526	10.076	15.2102	13.7854	9.8771	10.543	12.1255	10.1913	18.5694	9.9755	15.4893	16.1523	10.1919	10.5524	10.6879	12.2269	10.604
714	11.4006	10.7427	17.0589	11.2899	11.4124	13.7326	11.8913	11.3325	11.7001	12.036	12.2955	15.6135	27.982	15.5815	15.4146	14.5357	14.0517	12.5405	11.7908	11.9941	17.2095	17.936	13.295	18.9409	18.8855	15.4067	14.6481	10.3005	12.2341	10.4518	9.5069	9.8482	9.7935	10.1704	15.1953	13.8761	9.9254	10.6432	12.2176	10.3515	18.6265	10.0864	15.5846	16.2696	10.2609	10.7278	10.8558	12.2209	10.7066
715	11.4618	10.7679	17.005	11.3549	11.4195	13.8028	12.0089	11.3249	11.7542	12.1361	12.3828	15.6604	28.2133	15.5939	15.4367	14.7129	14.1384	12.5276	11.9171	12.1091	17.3415	18.0205	13.4191	19.0781	18.9108	15.4521	14.6411	10.3328	12.3463	10.5199	9.5997	9.7991	9.8477	10.22	15.0385	13.9299	10.1116	10.7743	12.2322	10.5608	18.6501	10.1018	15.7127	16.3623	10.3323	10.8576	11.0652	12.4016	10.7865
716	11.4755	10.8749	17.0458	11.4564	11.4034	13.918	12.0522	11.4973	11.8068	12.2359	12.4498	15.7498	28.2557	15.6322	15.5065	14.779	14.1377	12.6193	12.0157	12.173	17.3848	17.9264	13.5204	19.1653	18.9697	15.3902	14.7736	10.3244	12.4204	10.6564	9.5841	9.8756	9.9661	10.1826	15.0684	13.9409	10.1343	10.8614	12.3954	10.6199	18.6146	10.0998	15.667	16.4264	10.3174	10.8173	11.085	12.4454	10.8362
717	11.6077	10.9496	17.1643	11.509	11.3717	13.9997	12.1705	11.5589	11.8655	12.2389	12.528	15.9013	28.2378	15.6967	15.6732	14.9074	14.3172	12.8145	12.1166	12.3832	17.5171	18.0903	13.6821	19.298	19.0624	15.4992	15.0611	10.298	12.3636	10.642	9.5791	10.1349	9.9857	10.3358	15.1823	14.0026	10.1896	10.8629	12.5086	10.657	18.7166	10.1772	15.7274	16.5106	10.4573	10.7895	11.1659	12.529	10.9168
718	11.6386	10.8806	17.0237	11.6213	11.3745	14.0501	12.3076	11.5347	12.0007	12.194	12.5486	16.0356	28.3983	15.9416	15.6885	15.0156	14.4725	12.9545	12.1602	12.6506	17.6716	18.27	13.7103	19.3459	19.2828	15.7251	15.2812	10.2376	12.4036	10.5465	9.5866	10.2322	9.9431	10.3481	15.1628	14.0084	10.2511	10.8882	12.4283	10.734	18.7505	10.254	15.8001	16.6229	10.5965	10.947	11.2849	12.6452	11.093
719	11.4716	10.9152	16.8656	11.5716	11.3979	13.9328	12.3193	11.6947	12.0098	12.2973	12.5042	16.1756	28.5923	16.1668	15.7957	15.0553	14.5881	13.1396	12.3058	12.7748	17.658	18.3509	13.783	19.4511	19.4007	15.8779	15.3976	10.304	12.3684	10.6441	9.5281	10.0115	9.8646	10.2778	15.2143	14.067	10.3307	10.8967	12.2934	10.7499	18.784	10.3471	15.8626	16.6961	10.6544	11.0541	11.3803	12.7077	11.0088
720	11.6888	11.0676	17.1158	11.7385	11.6686	14.066	12.5624	12.0126	12.241	12.5567	12.8139	16.3437	28.6703	16.1952	15.9303	15.2176	14.7977	13.3024	12.4321	12.8779	17.7288	18.5164	14.1282	19.6922	19.4651	15.9873	15.509	10.5633	12.6405	10.9611	9.7109	10.2019	10.0639	10.4159	15.6266	14.3854	10.5579	11.1033	12.6003	10.8832	18.9252	10.5772	16.0242	16.8706	10.8075	11.0873	11.5559	12.709	11.0534
721	11.816	11.2107	17.3458	12.0201	11.8414	14.1908	12.8379	12.2044	12.515	12.6765	13.132	16.3761	28.8219	16.373	16.2449	15.446	14.9892	13.3663	12.5515	13.0535	18.063	18.756	14.5152	20.0202	19.7177	16.1898	15.7767	10.7605	12.8411	11.0687	9.9035	10.3644	10.3161	10.788	16.0463	14.5605	10.6572	11.2638	12.921	11.0437	19.0699	10.7258	16.1914	16.9585	11.0305	11.3746	11.8265	12.9118	11.4701
722	11.9326	11.2957	17.3571	12.0781	11.8996	14.3889	12.7477	12.1983	12.6247	12.797	13.1593	16.5649	28.9164	16.4339	16.4682	15.6031	14.9949	13.4657	12.6692	13.1722	18.2581	18.933	14.583	20.1464	19.7113	16.3955	15.9999	10.7838	12.6958	11.1555	10.076	10.4189	10.3995	10.8892	16.2697	14.4681	10.574	11.3976	12.9544	10.9833	19.0593	10.778	16.1073	16.9914	11.0794	11.5125	11.8072	13.1049	11.6039
723	12.2252	11.5074	17.5785	12.2007	12.1549	14.6515	12.9645	12.3788	12.7282	13.1537	13.304	16.8538	29.0903	16.5387	16.4871	15.8061	15.1172	13.6733	12.9884	13.3974	18.255	19.1593	14.65	20.3771	19.8681	16.6218	16.2428	10.8912	12.8246	11.33	10.2007	10.5364	10.5844	10.8766	16.5644	14.6452	10.8365	11.6308	13.2727	11.0156	19.0385	10.8803	16.2081	16.9845	11.2528	11.5668	11.7538	13.0722	11.6635
724	12.4828	11.7132	17.6323	12.1754	12.2159	14.7262	13.0861	12.5368	12.9183	13.3355	13.4226	17.2334	29.3776	16.878	16.7671	16.1217	15.3448	14.0068	13.314	13.7404	18.4264	19.4368	14.9502	20.6456	20.1931	17.0546	16.447	10.898	12.9146	11.3703	10.2439	10.8059	10.7566	11.0564	16.5958	14.6861	11.2155	11.8143	13.5243	11.3481	19.2457	11.1745	16.4107	17.1334	11.4806	11.702	11.8688	13.2422	11.8252
725	12.6479	11.7015	17.5431	12.054	12.2244	14.7763	13.3111	12.7148	13.0653	13.2971	13.6412	17.2425	29.4229	17.112	16.8864	16.3363	15.5365	14.1408	13.4736	13.8134	18.7042	19.5746	15.1711	20.7288	20.3957	17.2869	16.6441	10.9825	12.9946	11.4665	10.2659	10.8762	10.8662	11.1587	16.673	14.8872	11.3177	11.8849	13.4454	11.4785	19.3507	11.2834	16.4997	17.3885	11.5394	11.7533	12.0384	13.3333	11.9655
726	12.6575	11.7279	17.7126	12.3597	12.3384	14.7157	13.4441	12.8517	13.1262	13.3831	13.8522	17.2737	29.4696	17.1268	16.8818	16.4781	15.7834	14.1231	13.6321	13.8767	18.9019	19.7347	15.4471	20.7385	20.4948	17.3637	16.7855	11.0238	12.9377	11.4641	10.4039	10.9399	10.8319	11.0829	16.7077	14.9543	11.1916	11.9318	13.2917	11.591	19.3879	11.2184	16.4953	17.5196	11.6118	11.8214	12.2203	13.3089	12.0323
727	12.6989	11.7469	17.8175	12.5081	12.418	14.8203	13.5508	12.9498	13.2869	13.4711	13.7895	17.5231	29.6596	17.2456	17.1817	16.6545	15.9318	14.3987	13.8087	14.1022	19.0416	19.9277	15.5541	20.947	20.6203	17.5207	17.0866	10.9182	12.9191	11.54	10.5605	10.9715	10.7638	11.0859	16.6787	14.857	11.2344	11.9485	13.4261	11.749	19.3714	11.3238	16.6172	17.6585	11.7291	12.0471	12.3408	13.576	12.1621
728	12.8061	11.8313	17.8502	12.6274	12.5757	15.0054	13.7513	13.1285	13.4667	13.5835	13.8408	17.7128	29.8023	17.2432	17.4945	16.7954	15.9705	14.6115	13.9188	14.3098	19.2193	19.9545	15.617	21.1116	20.7131	17.7634	17.1994	10.993	13.1154	11.6925	10.5354	11.1086	10.9486	11.3988	16.7224	14.9172	11.4316	12.0617	13.7607	11.7806	19.4064	11.474	16.6051	17.6666	11.7421	12.0016	12.4024	13.7247	12.1067
729	13.1452	12.2773	18.046	12.918	12.8952	15.2893	14.1081	13.4215	13.8041	13.8614	14.1642	17.9435	30.0317	17.5248	17.5966	16.9019	16.2677	14.8171	14.0999	14.5843	19.312	20.1361	15.9162	21.3804	20.9884	17.9712	17.3514	11.3588	13.3411	11.8695	10.7627	11.4739	11.23	11.7179	16.8581	15.3773	11.7425	12.3261	14.1233	11.9231	19.3762	11.6209	16.7338	17.775	11.942	12.1636	12.4975	13.7606	12.3572
730	13.0777	12.414	18.0306	13.1115	13.0283	15.4185	14.134	13.5059	13.8082	13.7892	14.1636	18.1238	30.2765	17.81	17.8503	17.1795	16.6176	14.9037	14.2501	14.7985	19.4287	20.4311	16.0809	21.6244	21.1517	18.1934	17.6515	11.4873	13.2703	11.9262	10.924	11.5241	11.42	11.7721	16.7346	15.3378	11.7114	12.4268	13.9134	12.2005	19.3327	11.8313	17.002	17.9031	12.2113	12.4831	12.8881	13.9242	12.6068
731	13.1058	12.3621	18.0081	13.1761	13.0267	15.442	14.0889	13.4736	13.7389	14.0221	14.223	18.2135	30.4514	17.9793	17.8325	17.3686	16.7075	15.112	14.3049	14.8684	19.5493	20.6131	16.226	21.9113	21.2585	18.2071	17.6643	11.6155	13.302	11.8459	10.9118	11.4903	11.5149	11.8774	16.5871	15.2058	11.6683	12.4942	13.9431	12.2614	19.4941	11.9316	17.1799	18.0242	12.341	12.5503	12.986	13.988	12.664
732	13.2412	12.3028	17.9428	13.2092	13.0754	15.3534	14.1286	13.3193	13.7417	14.0207	14.4447	18.1341	30.3169	17.9787	17.8488	17.4562	16.4735	15.1835	14.2932	14.8665	19.6372	20.4997	16.2579	21.718	21.2465	18.0425	17.6369	11.5761	13.4125	11.6821	10.9432	11.3286	11.5505	11.7557	16.5289	15.0727	11.6446	12.436	14.0315	12.1295	19.4706	11.8725	16.9871	17.9356	12.246	12.4159	12.7878	13.8158	12.5245
733	13.4768	12.6162	18.214	13.338	13.3056	15.4657	14.0141	13.3522	13.862	14.1984	14.5084	18.2885	30.3964	18.0374	17.9415	17.4131	16.5038	15.0271	14.3326	14.8237	19.7411	20.5155	16.2371	21.7029	21.2358	18.0908	17.6849	11.6061	13.5384	11.7717	10.9781	11.4323	11.5949	11.7558	16.6402	15.2552	11.8689	12.4888	14.1109	12.1107	19.4612	11.9815	16.9108	18.0739	12.2863	12.4067	12.9019	13.8488	12.5244
734	13.6531	12.7488	18.2728	13.3483	13.3303	15.6237	14.1148	13.5869	13.9969	14.3983	14.7458	18.2965	30.5483	18.2821	17.8854	17.3757	16.7312	15.1402	14.52	14.9555	19.9147	20.6109	16.2931	21.8934	21.4574	18.322	17.7282	11.5922	13.7929	12.0268	10.9586	11.7182	11.7827	11.8019	16.6142	15.308	12.1089	12.6931	14.2858	12.3007	19.592	12.0328	17.042	18.2037	12.4165	12.4605	13.0278	13.8553	12.7144
735	13.6793	12.7546	18.4467	13.5371	13.2622	15.6827	14.1304	13.8069	14.0462	14.3631	14.7767	18.3617	30.5609	18.3249	17.9828	17.4203	16.8382	15.3112	14.5989	14.8598	19.8593	20.6435	16.3185	21.8228	21.4257	18.3777	17.6974	11.6945	13.8772	12.0964	11.0758	11.7502	11.7898	11.858	16.7469	15.4558	12.1971	12.6566	14.3509	12.4339	19.7156	12.0589	17.1813	18.3008	12.398	12.4936	13.0211	13.9383	12.7609
736	13.539	12.7124	18.417	13.5331	13.2851	15.4798	14.1236	13.6991	13.9691	14.3514	14.5464	18.5495	30.7812	18.5353	18.0766	17.4613	16.9417	15.4396	14.6051	14.9987	19.9388	20.6841	16.6277	21.934	21.4549	18.5599	17.8992	11.8033	13.8202	11.9685	11.0946	11.7055	11.6857	11.8269	16.8263	15.2987	12.148	12.5651	14.3971	12.5525	19.7795	12.0956	17.2774	18.3953	12.5842	12.7314	13.1097	14.1094	12.9808
737	13.7274	12.9857	18.5433	13.5461	13.3407	15.604	14.3779	13.8776	14.3498	14.4159	14.7094	18.782	30.8418	18.6992	18.3496	17.7381	17.065	15.5512	14.7195	15.1846	20.04	21.0693	16.8541	22.2593	21.6212	18.8354	18.3428	11.9223	13.9938	12.1984	11.3855	11.8646	11.8993	12.0742	17.0375	15.4867	12.2341	12.7092	14.4008	12.5892	19.8771	12.1533	17.2548	18.5291	12.7832	13.0844	13.3609	14.2231	13.2515
738	13.7571	13.1791	18.5977	13.5675	13.4715	15.6311	14.646	14.2089	14.5347	14.55	15.1569	18.9077	31.0314	18.8611	18.6305	18.0257	17.0822	15.7583	14.9494	15.2597	20.149	21.1816	16.887	22.5165	21.8337	19.0938	18.3836	11.8077	14.0292	12.3981	11.4837	11.906	12.0709	12.1266	17.2364	15.8314	12.5185	12.9217	14.6036	12.6649	19.987	12.2451	17.196	18.4781	12.9142	13.1125	13.3839	14.328	13.2974
739	13.9711	13.2767	18.5805	13.7356	13.5732	15.8802	15.0303	14.3006	14.593	14.6998	15.2027	18.9168	31.0714	18.6589	18.4852	18.0922	17.0129	15.7512	14.9335	15.348	20.368	21.1518	16.8905	22.589	21.9446	19.2593	18.4586	11.927	14.1864	12.4729	11.5336	12.0314	12.1094	12.3358	17.5327	15.9327	12.637	13.1911	14.6687	12.7706	20.0524	12.2122	17.1243	18.508	12.8713	12.9076	13.3015	14.2209	13.1805
740	13.8183	13.2719	18.4895	13.6504	13.518	15.8283	15.0177	14.1856	14.326	14.8123	15.1559	19.1511	31.306	18.7336	18.5667	18.2341	17.3865	15.8992	15.083	15.7197	20.8196	21.3091	17.1252	22.6738	22.1324	19.3556	18.7216	11.9986	14.1957	12.2205	11.4191	12.0661	12.083	12.4312	17.6102	15.6091	12.5367	13.0377	14.694	12.9065	19.9493	12.5101	17.2055	18.7341	13.0815	13.0912	13.4741	14.3544	13.3102
741	14.0655	13.4035	18.6476	13.9493	13.7181	15.9029	15.2036	14.4492	14.566	15.1605	15.582	19.4318	31.574	19.1806	18.7906	18.5736	17.8759	16.0562	15.6175	16.1077	21.2	21.7484	17.4847	23.0085	22.6032	19.693	19.2874	12.2271	14.345	12.4322	11.501	12.2726	12.3824	12.7097	17.8051	15.7113	12.7855	13.3531	14.8836	13.1718	20.2437	12.7932	17.3696	18.9609	13.4639	13.6093	13.9486	14.8657	13.7108
742	14.1242	13.365	18.8412	14.2155	13.7185	16.1298	15.3627	14.5281	14.8035	15.3351	15.6207	19.5046	31.806	19.3531	18.9188	18.5191	17.8053	16.1387	15.7952	16.1791	21.1492	21.8032	17.578	23.2487	22.5455	19.7519	19.1628	12.2531	14.1583	12.524	11.6376	12.3885	12.4931	12.8944	17.9832	16.0212	12.7302	13.5009	15.1773	13.2917	20.2088	12.6966	17.515	18.9503	13.4491	13.6838	13.9319	15.0832	13.8922
743	13.9526	13.2133	18.9692	14.124	13.8897	16.2793	15.3353	14.6118	15.0381	15.3872	15.5435	19.5773	31.8109	19.2866	19.0891	18.5602	17.9286	16.3993	15.7797	16.3455	21.2381	21.9487	17.7862	23.3852	22.7191	19.7351	18.9763	12.2229	14.0373	12.6061	11.7279	12.4462	12.2851	13.0937	18.1057	16.22	12.8509	13.545	15.4148	13.1654	20.2906	12.8518	17.6778	18.9725	13.4896	13.7652	14.0718	15.1745	13.9626
744	13.9191	13.2204	18.8038	13.9709	13.7358	16.2786	15.1729	14.7076	15.0547	15.2589	15.5612	19.6923	31.7952	19.401	19.2872	18.6407	17.9912	16.6987	15.8775	16.3925	21.2432	21.8427	17.9604	23.4346	22.9272	19.9082	19.2036	12.3232	13.9525	12.708	11.753	12.4133	12.1501	13.0877	18.0688	16.3093	12.6574	13.4971	15.3379	13.3375	20.4241	13.099	17.8536	19.158	13.5178	13.8709	14.2049	15.1986	13.9503
745	13.9179	13.25	18.7436	13.8436	13.8826	15.9627	15.191	14.7688	14.8448	15.2347	15.2973	19.7065	31.8465	19.3555	19.4138	18.8218	17.9498	16.9121	16.1637	16.3414	21.4182	21.9324	18.0671	23.4985	23.1031	19.9591	19.5264	12.0536	13.9468	12.4147	11.5929	12.2711	12.1572	12.8599	17.957	16.227	12.5467	13.6638	15.2561	13.3389	20.4133	13.1403	17.7323	19.2587	13.6578	14.0593	14.2635	15.1513	13.9999
746	14.1423	13.5388	18.899	14.1061	14.2146	16.0227	15.3452	14.9253	15.2782	15.4788	15.7501	19.543	31.9431	19.4561	19.2458	18.8851	18.21	16.8666	16.1976	16.2566	21.4782	22.0335	18.2018	23.4266	23.1389	19.9598	19.5334	12.4955	14.3391	12.808	12.0216	12.4884	12.6336	12.9249	18.1951	16.5926	12.984	13.9531	15.4569	13.3322	20.7138	13.1271	17.68	19.194	13.8095	14.0136	14.3045	15.2322	14.0635
747	14.1323	13.431	18.7968	14.1264	14.1106	16.1064	15.3429	14.922	15.3282	15.3925	15.8815	19.601	32.0522	19.5596	19.105	18.7181	18.3355	16.7285	16.3034	16.3915	21.625	21.9358	18.3096	23.4867	23.1351	20.2276	19.6727	12.3839	14.3998	12.8373	12.1031	12.56	12.5921	13.1495	17.9265	16.5752	13.1068	13.9444	15.4798	13.4305	20.7603	13.2785	17.7539	19.633	13.8894	14.0021	14.4005	15.198	14.1829
748	14.1002	13.304	18.7652	14.0634	13.9229	16.0535	15.5188	14.6783	15.0555	15.2948	15.8831	19.4934	32.0173	19.5215	19.0355	18.5551	18.0814	16.5322	16.2095	16.5032	21.3375	21.8566	17.9908	23.3538	23.1434	20.2723	19.4435	12.1909	14.1904	12.7879	11.6252	12.5124	12.545	13.1504	17.7496	16.4522	13.021	13.9654	15.2414	13.4277	20.5863	13.1938	17.583	19.6343	13.6725	13.9394	14.1967	14.9619	14.145
749	14.1786	13.3013	18.7656	14.1852	13.843	16.1015	15.6902	14.8121	15.1892	15.5632	16.108	19.4815	32.2666	19.5132	19.2472	18.7899	18.1854	16.7068	16.4116	16.7659	21.2905	22.1547	18.1178	23.7149	23.415	20.3788	19.6424	12.1173	14.3167	12.7796	11.6156	12.4252	12.5387	13.1076	17.9544	16.351	13.2102	13.9515	15.1779	13.6445	20.6086	13.3352	17.8786	19.6214	13.9777	14.1265	14.3017	15.1967	14.309
750	14.4091	13.6502	19.0019	14.3136	14.2198	16.2622	15.8652	15.106	15.4294	15.7359	16.3087	19.7586	32.5565	19.599	19.8266	19.0139	18.3923	16.9589	16.3972	16.9882	21.6077	22.2834	18.4076	24.0121	23.5989	20.5003	20.0222	12.6338	14.5183	13.0279	11.915	12.5595	12.6343	13.2089	17.9463	16.7737	13.3984	14.036	15.465	13.7399	20.7398	13.5512	17.8513	19.7229	14.1719	14.3571	14.5542	15.4026	14.3371
[truncated: 71 more columns]
