# Supplementary material for: Molecular basis of wax-based color change and UV reflection in dragonflies
Source: eLife. 2019 Jan 15;8:e43045. doi: 10.7554/eLife.43045 (PMC6353593; doi:10.7554/eLife.43045)
Supplement: Figure 7—source data 3. [file elife-43045-fig7-data3.xlsx]

## Sheet: Sdarwinianum-OCEAN
	Male	Male	Male	Male	Male	Male	Female	Female	Female	Female	Female	Female
wavelength	M1D5	M2D5	M3D5	M1V5	M2V5	M3V5	F1D5	F2D5	F3D5	F1V5	F2V5	F3V5	male D5	male V5	female D5	female V5
300	1.89	2.099	0.945	5.109	6.131	5.56	4.626	1.341	1.538	16.537	24.986	26.382	1.64467	5.6	2.50167	22.635	0.614874	0.512173	1.84236	5.32695
301	1.893	2.168	0.98	4.832	5.91	5.448	4.589	1.321	1.365	15.738	25.336	25.919	1.68033	5.39667	2.425	22.331	0.621897	0.54083	1.87421	5.71714
302	2.121	2.187	1.066	5.197	5.867	5.461	4.615	1.582	1.736	15.987	24.723	26.008	1.79133	5.50833	2.64433	22.2393	0.629023	0.337499	1.70838	5.45267
303	1.802	2.303	0.868	4.905	6.04	5.517	4.138	1.524	1.39	15.673	24.461	25.673	1.65767	5.48733	2.35067	21.9357	0.728306	0.568081	1.54933	5.45738
304	2.083	2.364	1.43	5.325	6.113	5.505	4.447	1.306	1.599	15.929	24.901	26.613	1.959	5.64767	2.45067	22.481	0.479188	0.412918	1.73507	5.7384
305	1.799	1.932	0.993	4.967	5.74	4.912	4.404	1.314	1.601	15.543	24.153	25.566	1.57467	5.20633	2.43967	21.754	0.508109	0.462986	1.7072	5.42508
306	1.867	2.203	1.062	4.752	6.049	5.221	4.573	1.129	1.308	15.597	24.229	25.078	1.71067	5.34067	2.33667	21.6347	0.586345	0.656729	1.93879	5.24598
307	2.194	2.171	1.262	5.092	6.047	5.422	4.819	1.637	1.807	15.799	24.551	26.586	1.87567	5.52033	2.75433	22.312	0.531575	0.485034	1.79007	5.73146
308	2.116	2.556	1.145	4.799	6.094	5.678	4.487	1.607	1.642	15.911	25.312	25.659	1.939	5.52367	2.57867	22.294	0.721961	0.661151	1.65276	5.53056
309	2.583	2.43	1.498	5.249	6.063	5.462	5.002	1.675	1.97	16.433	24.95	26.059	2.17033	5.59133	2.88233	22.4807	0.587262	0.422131	1.8416	5.2667
310	2.05	2.144	1.054	5.062	6.046	5.249	4.546	1.383	1.336	16.052	24.698	25.495	1.74933	5.45233	2.42167	22.0817	0.604008	0.522563	1.83988	5.23703
311	2.168	2.097	0.82	4.792	6.233	5.542	4.651	1.324	1.605	15.395	23.89	25.483	1.695	5.52233	2.52667	21.5893	0.758603	0.720701	1.84508	5.42326
312	2.08	2.045	1.011	4.853	5.946	5.147	4.36	1.269	1.81	15.699	23.854	26.052	1.712	5.31533	2.47967	21.8683	0.607336	0.56561	1.65073	5.45466
313	1.838	2.315	0.942	5.294	6.062	5.387	4.549	1.35	1.594	15.207	24.084	25.876	1.69833	5.581	2.49767	21.7223	0.697074	0.419146	1.78069	5.71314
314	1.862	1.933	1.02	4.862	6.203	5.361	4.424	1.494	1.376	15.346	23.885	25.605	1.605	5.47533	2.43133	21.612	0.507867	0.677772	1.72671	5.49424
315	1.74	2.422	1.058	4.857	5.891	5.233	4.104	1.152	1.47	15.51	23.848	24.882	1.74	5.327	2.242	21.4133	0.682	0.52337	1.62036	5.13851
316	1.769	2.111	0.849	4.716	5.542	5.082	3.985	1.179	1.721	15.717	24.042	25.139	1.57633	5.11333	2.295	21.6327	0.652688	0.41389	1.48846	5.1524
317	1.914	2.386	1.039	4.819	5.599	5.256	4.5	1.665	1.536	14.93	24.569	25.018	1.77967	5.22467	2.567	21.5057	0.683474	0.390943	1.67527	5.69912
318	1.767	2.158	1.032	4.969	5.669	5.586	4.127	1.127	1.482	14.741	23.138	25.617	1.65233	5.408	2.24533	21.1653	0.571691	0.382443	1.63921	5.70004
319	2.122	2.459	0.928	5.231	5.919	5.014	4.568	1.41	1.386	15.297	24.313	24.952	1.83633	5.388	2.45467	21.5207	0.804484	0.472486	1.83024	5.39931
320	2.106	2.385	1.211	5.229	6.04	4.975	4.334	1.404	1.84	15.494	23.859	25.263	1.90067	5.41467	2.526	21.5387	0.613344	0.556247	1.58088	5.28169
321	1.755	2.027	0.939	4.844	5.746	5.302	4.041	1.199	1.285	15.88	23.888	25.779	1.57367	5.29733	2.175	21.849	0.566213	0.451018	1.61658	5.25506
322	2.3	2.336	1.07	5.017	6.136	5.657	4.427	1.451	1.648	15.31	23.893	24.791	1.902	5.60333	2.50867	21.3313	0.720758	0.561427	1.66424	5.23392
323	1.876	2.298	0.932	4.82	5.777	5.268	4.522	1.28	1.131	14.834	23.295	24.848	1.702	5.28833	2.311	20.9923	0.699425	0.478824	1.91623	5.3895
324	2.053	2.129	0.932	5.127	5.593	5.227	4.32	1.36	1.675	15.443	23.794	25.381	1.70467	5.31567	2.45167	21.5393	0.670227	0.245327	1.62567	5.33888
325	2.159	2.221	0.987	4.862	5.713	5.183	4.307	1.641	1.604	15.622	23.223	25.346	1.789	5.25267	2.51733	21.397	0.695244	0.429756	1.55001	5.1127
326	1.73	2.035	1.023	4.885	5.811	4.995	4.301	1.486	1.486	15.156	23.514	24.464	1.596	5.23033	2.42433	21.0447	0.519137	0.505871	1.62524	5.12181
327	1.984	2.132	0.974	4.967	6.027	5.399	4.302	1.541	1.491	15.149	23.764	25.169	1.69667	5.46433	2.44467	21.3607	0.630207	0.533012	1.60869	5.42514
328	2.071	2.071	1.164	5.221	5.92	5.405	4.51	1.189	1.777	15.186	23.643	24.562	1.76867	5.51533	2.492	21.1303	0.523657	0.362326	1.7722	5.16841
329	1.854	2.222	0.81	5.144	5.905	5.316	4.174	1.154	1.436	14.463	23.56	24.616	1.62867	5.455	2.25467	20.8797	0.732473	0.399088	1.66816	5.58202
330	2.018	2.239	1.132	5.303	5.856	5.327	4.429	1.28	1.71	14.542	22.724	24.889	1.79633	5.49533	2.473	20.7183	0.585845	0.312577	1.70754	5.4573
331	1.788	2.195	0.987	5.106	5.488	5.439	4.588	1.209	1.517	14.776	22.805	24.507	1.65667	5.34433	2.438	20.696	0.614616	0.207852	1.86831	5.19702
332	1.701	1.949	1.068	4.78	5.947	5.376	3.985	1.229	1.266	14.699	23.277	24.531	1.57267	5.36767	2.16	20.8357	0.454304	0.583545	1.5806	5.35137
333	1.884	1.921	1.103	5.031	5.774	5.167	4.287	1.276	1.636	14.857	23.383	24.969	1.636	5.324	2.39967	21.0697	0.461962	0.3956	1.64436	5.43845
334	1.49	2.159	0.505	4.671	5.378	5.29	3.825	1.212	1.01	14.581	23.116	24.555	1.38467	5.113	2.01567	20.7507	0.832016	0.385304	1.57018	5.39131
335	1.547	1.56	0.774	4.318	5.578	4.705	4.231	1.36	1.36	14.352	22.364	24.51	1.29367	4.867	2.317	20.4087	0.450091	0.645432	1.65757	5.35385
336	1.87	1.908	0.606	5.26	5.286	4.99	4.358	1.212	1.367	14.234	22.795	24.948	1.46133	5.17867	2.31233	20.659	0.740984	0.163906	1.77329	5.66739
337	2.101	2.05	0.986	4.881	5.944	5.329	4.266	1.435	1.858	14.566	22.291	24.789	1.71233	5.38467	2.51967	20.5487	0.62954	0.533682	1.52709	5.32956
338	1.928	2.086	0.885	4.951	5.902	5.189	4.278	1.452	1.571	14.827	22.894	24.822	1.633	5.34733	2.43367	20.8477	0.652586	0.494876	1.59835	5.30242
339	1.434	1.704	0.595	4.531	5.193	5.031	3.814	1.109	1.258	14.471	22.978	24.817	1.24433	4.91833	2.06033	20.7553	0.578317	0.345082	1.52055	5.51952
340	1.884	1.87	0.984	4.373	5.442	5.132	3.951	1.097	1.322	14.82	23.299	24.564	1.57933	4.98233	2.12333	20.8943	0.515621	0.549991	1.5868	5.29841
341	2.005	2.019	1.045	4.884	5.774	5.251	4.221	1.186	1.51	14.37	22.868	24.52	1.68967	5.303	2.30567	20.586	0.558342	0.447273	1.66662	5.44622
342	1.561	2.042	0.656	4.624	5.456	4.902	4.158	1.473	1.415	14.136	22.655	23.676	1.41967	4.994	2.34867	20.1557	0.703726	0.423561	1.5672	5.23812
343	1.983	2.22	1.302	5.179	5.357	5.623	4.321	1.569	1.509	13.954	23.084	25.037	1.835	5.38633	2.46633	20.6917	0.47656	0.223449	1.60647	5.91614
344	1.744	1.789	0.939	4.249	5.083	5.456	3.995	1.282	1.371	14.058	22.555	24.076	1.49067	4.92933	2.216	20.2297	0.478287	0.617999	1.5413	5.39865
345	1.549	2.271	0.947	4.376	5.94	5.128	3.895	1.068	1.444	14.421	22.436	23.624	1.589	5.148	2.13567	20.1603	0.662906	0.782192	1.53518	5.00578
346	1.833	2.257	1.151	4.771	5.62	4.847	4.15	1.378	1.666	14.132	21.766	23.917	1.747	5.07933	2.398	19.9383	0.557993	0.469771	1.52409	5.14216
347	1.285	1.453	0.49	4.36	5.477	4.498	3.427	1.01	0.903	13.632	22.215	22.965	1.076	4.77833	1.78	19.604	0.514396	0.608985	1.42735	5.18548
348	1.431	1.878	0.893	4.494	5.172	5.233	4.187	1.539	1.354	13.822	22.303	23.919	1.40067	4.96633	2.36	20.0147	0.4932	0.410188	1.58493	5.42353
349	1.579	1.876	0.969	4.847	5.472	5.347	4.253	1.313	1.517	13.727	22.686	24.359	1.47467	5.222	2.361	20.2573	0.462414	0.330719	1.64169	5.71696
350	1.89	1.795	0.693	4.787	5.323	4.929	3.669	1.071	1.575	14.331	21.732	23.748	1.45933	5.013	2.105	19.937	0.665362	0.277698	1.37771	4.95848
351	1.686	2.187	1.152	4.39	5.692	5.058	4.273	1.469	1.736	14.505	22.434	24.62	1.675	5.04667	2.49267	20.5197	0.517588	0.651074	1.54758	5.32229
352	1.531	1.645	0.603	4.332	4.918	4.69	3.843	0.912	1.433	14.346	21.755	23.579	1.25967	4.64667	2.06267	19.8933	0.571539	0.295394	1.56367	4.88993
353	1.954	1.735	0.891	4.925	5.269	5.097	3.94	1.141	1.266	14.087	22.076	23.562	1.52667	5.097	2.11567	19.9083	0.561288	0.172	1.58115	5.09588
354	2.027	2.027	1.309	4.739	5.659	5.44	4.302	1.496	1.45	14.326	21.761	23.882	1.78767	5.27933	2.416	19.9897	0.414537	0.480583	1.63349	5.01822
355	1.091	1.621	0.686	4.163	4.88	4.646	3.414	1.45	0.998	13.736	21.547	23.792	1.13267	4.563	1.954	19.6917	0.468891	0.365635	1.28444	5.27849
356	1.984	2.045	1.129	4.518	5.449	5.266	4.06	1.45	1.419	13.98	22.375	24.13	1.71933	5.07767	2.30967	20.1617	0.512153	0.493247	1.51591	5.42492
357	1.711	1.669	1.01	4.543	5.104	5.16	4.206	1.108	1.234	14.091	21.453	23.528	1.46333	4.93567	2.18267	19.6907	0.393159	0.34121	1.75339	4.95919
358	1.545	1.707	0.588	4.193	5.296	4.811	3.766	1.295	1.295	13.8	21.921	23.04	1.28	4.76667	2.11867	19.587	0.604739	0.552835	1.42663	5.04282
359	1.972	1.944	0.886	4.445	5.631	5.031	4.445	1.301	1.486	13.92	22.067	23.739	1.60067	5.03567	2.41067	19.9087	0.619078	0.593014	1.76421	5.25328
360	1.228	1.725	0.439	4.036	5.337	4.928	3.772	0.965	0.863	13.628	21.158	23.308	1.13067	4.767	1.86667	19.3647	0.648502	0.665275	1.65086	5.08307
361	2.005	1.887	1.017	4.703	5.779	5.042	4.261	1.342	1.666	14.212	21.996	24.193	1.63633	5.17467	2.423	20.1337	0.539594	0.550131	1.59998	5.24465
362	1.328	1.934	0.462	4.62	5.847	4.735	4.302	1.169	0.982	13.455	21.048	23.156	1.24133	5.06733	2.151	19.2197	0.739817	0.677655	1.86517	5.1024
363	1.883	2.091	0.771	4.715	5.501	5.086	4.004	1.335	1.379	13.597	21.886	23.354	1.58167	5.10067	2.23933	19.6123	0.709719	0.393205	1.5284	5.26089
364	1.885	2.167	1.113	4.734	5.343	5.269	3.874	1.321	1.781	14.069	21.49	23.909	1.72167	5.11533	2.32533	19.8227	0.545653	0.332311	1.36076	5.12751
365	1.468	1.715	0.77	4.463	5.291	5.408	4.085	1.468	1.585	13.272	21.835	22.968	1.31767	5.054	2.37933	19.3583	0.490108	0.515153	1.47831	5.30127
366	1.709	1.915	0.751	4.818	5.083	4.906	3.949	1.238	1.179	13.865	22.042	23.236	1.45833	4.93567	2.122	19.7143	0.621168	0.134968	1.5825	5.10073
367	1.728	1.846	1.064	4.697	5.318	4.919	4.121	1.019	1.329	13.693	21.374	23.309	1.546	4.978	2.15633	19.4587	0.421573	0.314676	1.7085	5.08608
368	1.237	1.693	0.53	4.579	5.286	5.286	3.445	1.075	0.942	13.501	20.966	23.322	1.15333	5.05033	1.82067	19.263	0.585997	0.408187	1.40828	5.1272
369	1.903	1.979	1.118	5.211	5.196	5.286	3.836	1.495	1.722	14.001	21.326	23.803	1.66667	5.231	2.351	19.71	0.476676	0.0482183	1.29105	5.0969
370	1.946	1.629	1.056	4.51	5.339	5.415	4.208	1.493	1.614	13.198	21.916	22.609	1.54367	5.088	2.43833	19.241	0.451095	0.502003	1.53377	5.24485
371	1.671	1.916	1.104	4.675	5.38	5.319	3.694	1.211	1.318	13.167	21.505	22.961	1.56367	5.12467	2.07433	19.211	0.416505	0.390615	1.40369	5.28464
372	1.949	1.513	0.889	4.647	5.411	5.037	4.085	1.325	1.388	13.66	21.254	23.515	1.45033	5.03167	2.266	19.4763	0.532771	0.382028	1.57562	5.1624
373	1.651	2.186	1.132	4.985	5.457	5.127	4.199	1.4	1.274	13.446	21.906	23.07	1.65633	5.18967	2.291	19.474	0.52702	0.24216	1.65358	5.25274
374	1.904	1.78	1.115	4.241	5.387	5.232	4.164	1.207	1.486	13.978	21.115	22.786	1.59967	4.95333	2.28567	19.293	0.424288	0.621748	1.63265	4.67814
375	1.608	1.904	0.89	4.245	5.26	4.963	3.886	1.03	1.077	13.36	21.133	23.412	1.46733	4.82267	1.99767	19.3017	0.52143	0.521849	1.63551	5.2703
376	1.785	1.723	0.59	4.61	5.215	5.122	3.911	1.242	1.164	13.534	21.574	22.521	1.366	4.98233	2.10567	19.2097	0.67275	0.325786	1.56395	4.93803
377	2.026	2.072	0.807	5.012	5.317	5.393	3.656	1.386	1.432	13.224	21.039	23.065	1.635	5.24067	2.158	19.1093	0.717438	0.201644	1.29751	5.19654
378	1.485	1.74	0.675	4.169	4.904	4.379	3.839	0.81	1.065	13.272	20.546	22.705	1.3	4.484	1.90467	18.841	0.55608	0.378583	1.68003	4.94223
379	1.717	1.672	0.723	4.413	5.377	5.182	4.037	1.085	1.13	13.451	21.57	23.181	1.37067	4.99067	2.084	19.4007	0.561347	0.509687	1.6915	5.21514
380	1.784	1.754	0.847	4.748	5.095	4.868	4.339	1.134	1.119	13.411	21.182	22.422	1.46167	4.90367	2.19733	19.005	0.532528	0.176228	1.85475	4.88406
381	1.653	2.029	0.932	4.885	5.561	5.426	3.893	1.127	1.593	13.332	21.013	22.546	1.538	5.29067	2.20433	18.9637	0.557468	0.357743	1.48087	4.93703
382	1.856	2.022	0.8	4.905	5.282	5.101	4.196	1.328	1.283	13.598	21.084	23.302	1.55933	5.096	2.269	19.328	0.662819	0.18855	1.66898	5.08474
383	1.886	1.81	0.649	4.797	5.401	5.461	3.952	1.388	1.312	13.2	21.014	22.899	1.44833	5.21967	2.21733	19.0377	0.693285	0.367267	1.50275	5.14267
384	1.734	2.035	0.889	4.508	5.292	5.111	3.799	1.462	1.07	13.297	20.7	23.353	1.55267	4.97033	2.11033	19.1167	0.59413	0.410493	1.4755	5.21162
385	2.12	2.194	1.045	5.08	5.58	5.462	3.961	1.251	1.458	14.385	21.496	22.836	1.78633	5.374	2.22333	19.5723	0.643079	0.261358	1.50842	4.54205
386	1.595	1.783	0.928	4.958	5.581	5.19	3.755	1.203	1.305	13.323	21.412	22.673	1.43533	5.243	2.08767	19.136	0.449307	0.314863	1.44485	5.07353
387	1.863	2.169	0.946	5.168	5.619	5.692	3.916	1.587	1.674	13.699	21.735	23.089	1.65933	5.493	2.39233	19.5077	0.636429	0.283815	1.32025	5.0758
388	1.521	1.752	1.347	4.345	5.257	5.344	4.301	1.173	1.593	13.222	21.521	22.303	1.54	4.982	2.35567	19.0153	0.203167	0.553371	1.69775	5.03239
389	1.416	1.979	0.852	4.825	5.479	5.51	3.744	1.172	0.944	13.151	21.339	22.253	1.41567	5.27133	1.95333	18.9143	0.5635	0.386847	1.55495	5.01207
390	1.732	1.778	1.064	4.847	5.713	5.41	4.346	1.687	1.641	13.448	20.742	22.504	1.52467	5.32333	2.558	18.898	0.399611	0.439457	1.54862	4.80136
391	0.997	1.786	0.804	4.702	4.985	5.06	3.795	0.967	0.982	12.887	20	22.917	1.19567	4.91567	1.91467	18.6013	0.520271	0.188802	1.62843	5.15921
392	1.24	1.794	0.467	4.668	5.339	5.047	3.559	0.715	1.08	12.998	20.525	22.232	1.167	5.018	1.78467	18.585	0.666505	0.336439	1.54742	4.91319
393	1.854	2.047	1.38	4.628	5.326	5.504	3.842	1.394	1.469	13.41	20.516	22.593	1.76033	5.15267	2.235	18.8397	0.343223	0.463009	1.39221	4.81554
394	1.859	1.935	0.869	4.906	5.424	5.043	4.068	1.341	1.6	12.616	20.905	22.322	1.55433	5.12433	2.33633	18.6143	0.594731	0.268407	1.50525	5.2428
395	1.517	1.768	0.876	4.912	5.209	5.162	4.004	1.111	1.549	13.374	21.195	23.979	1.387	5.09433	2.22133	19.516	0.45999	0.159644	1.55929	5.49825
396	1.458	1.853	0.668	4.891	4.967	5.392	3.919	1.109	1.382	12.318	20.611	22.843	1.32633	5.08333	2.13667	18.5907	0.603372	0.270001	1.54957	5.54574
397	1.755	1.741	0.699	4.701	5.192	5.192	4.106	0.967	1.443	12.853	21.586	23.207	1.39833	5.02833	2.172	19.2153	0.605681	0.283479	1.69172	5.56923
398	2.031	2.09	0.848	4.764	5.597	5.816	4.033	1.14	1.447	13.152	21.584	22.68	1.65633	5.39233	2.20667	19.1387	0.700658	0.555061	1.58908	5.21349
399	1.651	1.665	0.743	4.937	5.13	5.249	4.387	1.19	1.398	13.115	20.818	22.483	1.353	5.10533	2.325	18.8053	0.528322	0.157456	1.78877	4.9978
400	1.607	1.746	0.618	5.067	4.805	5.701	4.017	1.097	1.313	12.838	20.609	22.493	1.32367	5.191	2.14233	18.6467	0.615064	0.460691	1.6271	5.11789
401	1.614	1.814	0.861	4.812	4.966	5.166	3.844	1.445	0.953	13.669	20.741	22.955	1.42967	4.98133	2.08067	19.1217	0.50253	0.177497	1.54678	4.85017
402	1.621	1.901	0.966	5.236	5.392	5.517	3.584	1.044	1.309	13.184	20.913	23.001	1.496	5.38167	1.979	19.0327	0.47987	0.140785	1.39627	5.17157
403	1.713	1.803	0.917	4.718	5.259	5.62	3.952	1.488	1.277	12.938	20.481	23.261	1.47767	5.199	2.239	18.8933	0.487632	0.453983	1.48725	5.3415
404	1.818	1.933	1.031	4.954	5.47	5.842	4.367	1.403	1.475	13.431	20.418	22.981	1.594	5.422	2.415	18.9433	0.490951	0.445942	1.69086	4.94283
405	1.7	2.242	0.527	5.128	5.216	5.377	3.956	1.377	1.275	13.377	21.099	22.549	1.48967	5.24033	2.20267	19.0083	0.876634	0.126271	1.51929	4.93047
406	1.886	1.674	0.664	4.782	5.31	5.491	4.103	1.146	1.312	12.521	20.41	22.537	1.408	5.19433	2.187	18.4893	0.652984	0.368381	1.66138	5.27701
407	1.499	1.994	1.035	5.331	5.393	5.393	3.956	1.051	1.144	13.151	20.754	22.176	1.50933	5.37233	2.05033	18.6937	0.479583	0.0357957	1.65101	4.85246
408	2.036	1.754	0.767	5.308	5.512	5.637	3.868	1.816	1.629	13.044	20.2	22.502	1.519	5.48567	2.43767	18.582	0.66634	0.166073	1.24223	4.93223
409	2.012	1.935	1.06	5.329	5.713	5.774	4.254	1.397	1.628	13.068	20.485	22.297	1.669	5.60533	2.42633	18.6167	0.528813	0.241247	1.58701	4.88995
410	1.729	1.825	0.496	5.492	5.332	5.62	3.603	0.993	1.441	13.114	20.096	22.594	1.35	5.48133	2.01233	18.6013	0.741142	0.144296	1.39565	4.91357
411	2.051	2.051	0.928	5.339	5.502	5.86	4.232	1.514	1.465	13.674	20.853	21.781	1.67667	5.567	2.40367	18.7693	0.648364	0.266513	1.58357	4.43702
412	2.054	2.179	1.113	5.425	5.629	5.535	4.108	1.427	1.395	13.076	20.32	22.374	1.782	5.52967	2.31	18.59	0.582732	0.102105	1.5572	4.88445
413	1.695	2.168	0.799	4.874	5.265	5.509	4.075	1.434	1.548	12.567	20.636	23.032	1.554	5.216	2.35233	18.745	0.695306	0.320323	1.49296	5.48279
414	1.777	2.07	1.271	5.558	5.721	5.689	4.417	1.614	1.679	12.844	20.293	23.162	1.706	5.656	2.57	18.7663	0.404204	0.0863655	1.59988	5.32572
415	1.389	1.779	0.762	5.319	5.048	5.777	4.201	1.169	1.152	12.672	20.498	21.362	1.31	5.38133	2.174	18.1773	0.513082	0.368476	1.75545	4.78729
416	1.837	1.819	0.721	4.909	5.441	5.578	3.759	1.287	1.15	12.29	20.494	21.936	1.459	5.30933	2.06533	18.24	0.63919	0.353401	1.46836	5.20305
417	1.912	2.52	1.321	5.562	5.562	5.475	4.224	1.477	1.564	13.454	20.285	22.597	1.91767	5.533	2.42167	18.7787	0.59952	0.0502295	1.56147	4.75399
418	1.63	1.942	0.572	5.548	5.392	5.479	3.623	1.283	1.456	12.309	20.388	21.585	1.38133	5.473	2.12067	18.094	0.718054	0.0781729	1.30393	5.04558
419	1.984	1.667	1.134	5.285	4.902	5.635	4.035	1.1	1.384	12.538	20.207	22.508	1.595	5.274	2.173	18.4177	0.42955	0.366624	1.61878	5.2203
420	2.023	2.085	1.245	5.711	5.773	6.054	4.451	1.603	1.758	13.414	19.888	22.782	1.78433	5.846	2.604	18.6947	0.468104	0.182781	1.60143	4.79665
421	1.607	2.321	0.893	5.698	5.147	5.534	4.225	1.056	1.413	12.437	20.247	21.854	1.607	5.45967	2.23133	18.1793	0.714	0.282921	1.73577	5.0375
422	1.835	1.986	1.319	5.656	5.322	5.474	4.337	1.486	1.835	12.964	20	23.366	1.71333	5.484	2.55267	18.7767	0.349749	0.167224	1.5551	5.30781
423	1.854	2.115	0.674	4.981	5.379	6.13	3.816	1.395	1.441	12.674	20.398	22.513	1.54767	5.49667	2.21733	18.5283	0.767789	0.583468	1.38468	5.17911
424	1.723	2.002	1.071	5.216	5.123	5.775	4.362	1.273	1.537	12.713	20.009	21.981	1.59867	5.37133	2.39067	18.2343	0.477791	0.352665	1.71232	4.88222
425	1.537	1.909	1.197	5.467	5.484	5.645	4.368	0.987	1.375	13.038	20.883	22.177	1.54767	5.532	2.24333	18.6993	0.35612	0.0982293	1.85021	4.94536
426	1.746	2.312	1.019	5.707	5.594	6.015	4.204	1.067	1.584	12.692	20.631	22.668	1.69233	5.772	2.285	18.6637	0.648168	0.217897	1.68189	5.27095
427	1.768	1.895	0.717	5.844	5.207	5.748	3.981	1.433	1.736	12.5	20.764	22.086	1.46	5.59967	2.38333	18.45	0.646583	0.34343	1.39189	5.19507
428	1.274	1.79	0.88	4.946	4.825	5.796	3.854	1.305	1.472	12.335	20.24	22.425	1.31467	5.189	2.21033	18.3333	0.456361	0.529147	1.4259	5.30835
429	1.726	1.785	0.619	5.28	4.867	5.723	4.13	1.327	1.209	12.257	19.912	22.448	1.37667	5.29	2.222	18.2057	0.656821	0.428088	1.65343	5.30545
430	1.828	1.945	0.687	5.28	5.134	5.28	4.051	1.302	1.58	12.974	20.097	22.071	1.48667	5.23133	2.311	18.3807	0.694998	0.0842931	1.51328	4.78521
431	1.53	1.997	0.934	5.604	5.137	5.121	4.106	0.918	0.982	12.738	20.37	21.514	1.487	5.28733	2.002	18.2073	0.532803	0.274358	1.8224	4.77099
432	1.821	2.466	1.026	5.693	5.23	5.892	4.22	1.705	2.069	12.893	20.854	23.105	1.771	5.605	2.66467	18.9507	0.721301	0.33966	1.3592	5.36547
433	1.685	2.102	1.091	5.905	4.926	5.632	4.365	1.187	1.252	12.58	20.491	22.866	1.626	5.48767	2.268	18.6457	0.508076	0.505207	1.81635	5.38557
434	1.69	1.771	0.585	5.217	5.266	5.526	3.998	0.845	0.943	13.018	20.624	21.876	1.34867	5.33633	1.92867	18.506	0.662594	0.166073	1.79276	4.7938
435	1.878	2.257	0.999	5.202	5.375	6.064	4.496	1.757	1.774	12.937	20.517	22.36	1.71133	5.547	2.67567	18.6047	0.645348	0.456014	1.57648	4.9941
436	1.618	1.952	0.721	5.592	4.607	5.803	4.185	1.372	1.442	12.819	20.274	21.822	1.43033	5.334	2.333	18.305	0.636596	0.638378	1.60426	4.81365
437	1.236	1.826	0.793	5.127	4.758	5.754	4.15	1.586	1.217	12.505	20.232	22.15	1.285	5.213	2.31767	18.2957	0.51824	0.503538	1.59754	5.10574
438	1.639	2.272	1.192	5.456	5.345	5.605	4.581	1.657	1.676	12.756	20.149	22.551	1.701	5.46867	2.638	18.4853	0.542663	0.130462	1.68271	5.10503
439	1.518	1.595	0.711	5.324	5.112	5.785	4.017	1.096	1.211	12.743	20.623	22.391	1.27467	5.407	2.108	18.5857	0.489666	0.344092	1.65424	5.13654
440	1.742	1.999	1.01	5.127	4.612	5.641	4.355	1.762	2.078	12.609	20.329	23.298	1.58367	5.12667	2.73167	18.7453	0.513159	0.5145	1.4147	5.51767
441	1.438	1.983	0.719	5.442	4.354	5.675	3.848	1.05	1.224	12.75	20.311	22.527	1.38	5.157	2.04067	18.5293	0.633993	0.705109	1.56761	5.12623
442	1.112	1.534	0.23	4.831	3.911	4.678	3.7	0.863	1.15	11.867	19.268	21.549	0.958667	4.47333	1.90433	17.5613	0.665385	0.492967	1.5617	5.0616
443	1.255	1.461	1.087	4.572	4.441	5.79	3.916	1.012	1.312	11.954	20.049	21.997	1.26767	4.93433	2.08	18	0.187321	0.743918	1.59708	5.32581
444	1.903	2.177	1.134	5.799	4.83	5.964	4.501	1.262	1.5	12.843	20.856	23.417	1.738	5.531	2.421	19.0387	0.540723	0.612664	1.80526	5.51628
445	1.679	1.869	0.433	5.314	5.141	5.539	4.051	1.316	1.644	12.55	21.032	23.282	1.327	5.33133	2.337	18.9547	0.780033	0.199565	1.4934	5.65954
446	1.618	1.7	0.964	4.968	4.429	5.589	4.478	1.193	1.438	12.96	20.886	22.618	1.42733	4.99533	2.36967	18.8213	0.403348	0.580483	1.82997	5.14941
447	1.125	1.607	0.305	4.323	4.596	5.769	4.307	0.964	1.494	13.016	20.874	22.835	1.01233	4.896	2.255	18.9083	0.658271	0.768264	1.79673	5.19626
448	1.825	2.228	1.211	5.135	4.812	5.878	4.699	1.469	1.502	13.515	21.508	23.317	1.75467	5.275	2.55667	19.4467	0.512135	0.546616	1.85539	5.216
449	2.066	1.877	1.12	5.378	4.542	6.434	4.605	1.498	1.656	13.484	20.975	23.182	1.68767	5.45133	2.58633	19.2137	0.500614	0.948129	1.75	5.08326
450	1.326	1.981	0.655	5.017	4.553	6.215	4.681	1.086	1.566	12.798	21.713	22.799	1.32067	5.26167	2.44433	19.1033	0.663016	0.857588	1.95182	5.48751
451	1.923	1.956	1.26	5.438	4.642	5.67	4.924	1.641	1.641	13.13	20.773	23.392	1.713	5.25	2.73533	19.0983	0.392656	0.53917	1.89544	5.33203
452	1.746	1.576	0.763	5	4.153	6.22	5.034	1.627	1.424	12.186	20.949	22.492	1.36167	5.12433	2.695	18.5423	0.525382	1.03909	2.02817	5.55855
453	1.789	1.789	1.035	4.91	4.787	5.646	4.559	1.648	1.42	13.309	21.27	23.321	1.53767	5.11433	2.54233	19.3	0.435322	0.464526	1.7502	5.28873
454	1.906	2.195	0.834	5.514	4.391	5.837	5.037	1.736	1.872	13.376	20.899	22.771	1.645	5.24733	2.88167	19.0153	0.717057	0.758988	1.86781	4.97269
455	1.345	1.603	0.328	5.121	4.172	6.103	4.448	1.224	1.517	13.224	21.052	22.914	1.092	5.132	2.39633	19.0633	0.674102	0.965547	1.78282	5.142
456	1.384	1.739	0.878	4.659	4.49	6.482	4.524	1.637	1.688	12.981	20.003	22.367	1.33367	5.21033	2.61633	18.4503	0.432701	1.10453	1.65228	4.88184
457	1.828	1.478	0.938	4.721	4.387	5.897	5.087	1.192	1.796	12.891	21.03	22.794	1.41467	5.00167	2.69167	18.905	0.448367	0.793162	2.09629	5.28243
458	1.586	1.766	0.838	4.909	4.49	6.136	4.744	1.317	1.302	12.436	20.233	22.149	1.39667	5.17833	2.45433	18.2727	0.492119	0.855415	1.98292	5.14468
459	2.095	1.884	1.281	5.502	4.658	6.045	4.839	1.583	1.688	12.798	20.636	22.746	1.75333	5.40167	2.70333	18.7267	0.422439	0.698922	1.85029	5.24164
460	1.802	1.788	0.77	5.233	4.201	6.032	4.491	1.192	1.584	13.488	21.134	23.11	1.45333	5.15533	2.42233	19.244	0.591825	0.917968	1.80221	5.08181
461	1.889	2.165	1.075	5.515	5.405	6.384	5.143	1.848	1.641	13.098	20.433	23.342	1.70967	5.768	2.87733	18.9577	0.566697	0.536299	1.96485	5.27895
462	2.253	2.132	1.073	5.323	4.76	6.007	5.323	1.636	1.944	13.248	20.971	22.942	1.81933	5.36333	2.96767	19.0537	0.649169	0.624478	2.04558	5.12353
463	1.749	1.825	0.786	5.196	4.689	6.477	4.588	1.166	1.673	13.207	20.33	22.814	1.45333	5.454	2.47567	18.7837	0.579176	0.921498	1.84682	4.98668
464	1.725	1.464	0.571	5.187	4.765	6.117	4.641	1.179	1.067	12.892	20.263	22.174	1.25333	5.35633	2.29567	18.443	0.605156	0.691723	2.03189	4.90134
465	1.732	1.576	1.131	5.268	4.498	6.158	5.028	1.479	1.624	12.918	21.097	22.829	1.47967	5.308	2.71033	18.948	0.311866	0.830723	2.00847	5.29345
466	1.965	1.621	0.793	5.042	5.089	6.379	5.03	1.444	1.657	12.877	21.34	21.754	1.45967	5.50333	2.71033	18.657	0.602426	0.758714	2.01171	5.00991
467	1.724	1.5	0.992	5.302	4.829	6.577	4.818	1.476	1.511	13.425	20.64	22.883	1.40533	5.56933	2.60167	18.9827	0.37507	0.904144	1.91948	4.94201
468	1.851	1.701	0.822	5.253	4.189	5.832	4.999	1.238	1.689	13.168	20.285	22.796	1.458	5.09133	2.642	18.7497	0.555875	0.833345	2.05364	4.99425
469	1.527	1.596	0.775	5.118	4.537	6.429	4.856	1.653	1.664	13.097	20.597	21.931	1.29933	5.36133	2.72433	18.5417	0.455395	0.969187	1.84609	4.76216
470	1.748	1.871	0.997	5.49	4.717	6.454	5.12	1.793	1.714	12.896	20.471	22.779	1.53867	5.55367	2.87567	18.7153	0.473111	0.870248	1.94405	5.17013
471	1.766	2.09	0.95	5.51	4.359	6.673	5.242	1.453	1.587	12.708	20.443	22.667	1.602	5.514	2.76067	18.606	0.587428	1.15701	2.14994	5.22746
472	1.862	1.927	1.187	5.433	4.41	6.49	5.433	1.797	2.091	13.23	21.309	23.138	1.65867	5.44433	3.107	19.2257	0.409766	1.04005	2.01973	5.27232
473	2.006	2.037	1.054	5.466	4.627	6.326	5.169	1.863	1.771	13.461	20.36	22.53	1.699	5.473	2.93433	18.7837	0.558801	0.849522	1.93582	4.73554
474	1.641	1.901	0.971	5.123	4.623	6.594	4.843	1.681	1.611	13.268	20.863	22.273	1.50433	5.44667	2.71167	18.8013	0.479826	1.02459	1.84612	4.84359
475	1.819	1.705	0.933	5.153	4.619	6.705	5.362	1.562	1.753	13.163	20.497	22.735	1.48567	5.49233	2.89233	18.7983	0.482006	1.08361	2.14093	5.00698
476	2.034	1.891	1.183	5.636	4.883	6.505	5.241	1.64	1.667	13.162	20.267	22.829	1.70267	5.67467	2.84933	18.7527	0.455689	0.811691	2.07129	5.00826
477	1.953	1.936	0.993	5.833	4.907	6.869	5.052	1.817	1.588	12.88	20.878	22.814	1.62733	5.86967	2.819	18.8573	0.549415	0.981514	1.93722	5.26625
478	1.9	1.788	1.234	5.635	4.906	6.749	5.427	1.9	2.012	12.914	20.922	23.03	1.64067	5.76333	3.113	18.9553	0.356608	0.928178	2.00477	5.33706
479	1.62	1.596	0.814	5.54	4.657	6.734	5.517	1.573	1.79	12.809	20.465	22.774	1.34333	5.64367	2.96	18.6827	0.458573	1.04237	2.21708	5.21611
480	1.991	1.685	0.999	5.526	5.041	6.779	5.31	1.835	1.805	12.947	20.919	22.686	1.55833	5.782	2.98333	18.8507	0.507986	0.896835	2.01501	5.1885
481	1.808	1.877	1.004	5.556	4.835	6.966	5.379	1.701	1.64	13.226	20.858	22.989	1.563	5.78567	2.90667	19.0243	0.485336	1.08391	2.14132	5.1333
482	1.743	1.961	1.164	5.908	4.876	6.759	5.548	2.008	1.813	13.3	20.755	22.091	1.62267	5.84767	3.123	18.7153	0.411901	0.942949	2.10237	4.73715
483	1.928	1.986	0.952	5.636	5.031	6.645	5.214	1.879	1.887	13.133	20.366	22.923	1.622	5.77067	2.99333	18.8073	0.580961	0.815384	1.92316	5.07771
484	1.69	1.656	1.061	5.597	4.761	6.925	5.39	1.889	2.07	13.187	20.845	22.872	1.469	5.761	3.11633	18.968	0.353747	1.09128	1.97113	5.10805
485	1.846	1.837	1.136	5.406	5.113	6.852	5.184	1.58	1.607	12.746	20.469	22.839	1.60633	5.79033	2.79033	18.6847	0.407345	0.931029	2.07302	5.27779
486	1.972	1.718	1.042	5.972	4.873	6.93	5.296	1.634	2.066	12.845	20.808	22.808	1.57733	5.925	2.99867	18.8203	0.480693	1.02931	2.00124	5.27053
487	1.719	1.893	0.821	5.535	4.695	6.878	4.83	1.729	1.806	12.655	20.257	22.324	1.47767	5.70267	2.78833	18.412	0.575306	1.10112	1.76855	5.0917
488	1.683	1.703	1.149	5.521	5.192	6.67	5.264	1.857	1.878	12.919	20.605	22.524	1.51167	5.79433	2.99967	18.6827	0.314238	0.775986	1.961	5.08287
489	1.606	1.473	0.829	5.094	4.92	6.291	5.268	1.606	1.524	12.428	19.691	21.88	1.30267	5.435	2.79933	17.9997	0.415563	0.746405	2.13832	4.94778
490	1.97	2.202	1.138	6.153	5.12	6.869	5.299	2.044	1.917	12.916	20.607	21.976	1.77	6.04733	3.08667	18.4997	0.559485	0.879275	1.91699	4.8838
491	1.779	1.727	1.009	5.554	5.076	6.459	4.93	1.82	1.82	12.908	20.876	22.259	1.505	5.69633	2.85667	18.681	0.430335	0.7024	1.79556	5.04716
492	1.757	1.625	1.042	5.426	4.761	6.836	5.007	1.941	1.819	12.864	20.507	22.469	1.47467	5.67433	2.92233	18.6133	0.380469	1.05956	1.8064	5.07479
493	1.841	1.89	0.901	5.868	5.027	7.036	5.364	1.87	1.88	12.924	20.713	22.355	1.544	5.977	3.038	18.664	0.557393	1.00893	2.01438	5.03833
494	1.715	1.32	1.041	5.386	4.644	6.629	5.184	1.657	1.6	12.43	20.139	22.133	1.35867	5.553	2.81367	18.234	0.33866	1.00298	2.05297	5.12434
495	1.786	1.823	0.982	5.787	4.74	6.629	5.226	1.617	1.533	12.593	20.494	22.326	1.53033	5.71867	2.792	18.471	0.475231	0.946352	2.10832	5.17225
496	1.892	1.883	0.878	5.457	4.854	6.691	5.347	2.075	1.883	12.45	20.009	22.212	1.551	5.66733	3.10167	18.2237	0.582852	0.936388	1.94688	5.12003
497	1.904	1.913	0.956	5.757	4.782	6.999	5.372	2.145	2.056	13.051	20.166	22.571	1.591	5.846	3.191	18.596	0.549945	1.11118	1.88933	4.95038
498	1.85	1.6	1.01	5.613	4.692	6.962	5.425	1.779	1.859	12.611	20.493	22.138	1.48667	5.75567	3.021	18.414	0.431316	1.14171	2.08231	5.09241
499	1.736	1.772	0.986	5.425	4.919	6.682	5.072	1.863	1.781	12.369	20.506	22.315	1.498	5.67533	2.90533	18.3967	0.44377	0.907768	1.87684	5.2979
500	1.749	1.749	1.178	5.927	4.988	7.105	5.228	1.997	1.887	12.913	20.184	22.651	1.55867	6.00667	3.03733	18.5827	0.329667	1.06075	1.89797	5.06264
501	1.836	1.667	1.086	5.844	5.038	7.249	5.385	2.145	1.939	13.017	20.135	22.429	1.52967	6.04367	3.15633	18.527	0.393409	1.11894	1.93283	4.90772
502	1.972	1.851	0.835	5.695	4.91	7.033	5.222	1.992	1.932	12.828	20.284	22.558	1.55267	5.87933	3.04867	18.5567	0.624455	1.07344	1.8824	5.08979
503	2.084	1.534	1.28	6.03	5.258	6.95	5.586	1.936	2.179	12.98	20.205	22.776	1.63267	6.07933	3.23367	18.6537	0.410981	0.847078	2.0408	5.07892
504	1.712	1.799	0.932	5.982	5.05	7.087	5.44	1.886	1.701	12.473	20.189	21.901	1.481	6.03967	3.009	18.1877	0.477434	1.01972	2.10734	5.02253
505	1.647	1.546	0.975	5.86	4.84	7.126	5.109	2.017	1.625	13.445	20.235	22.801	1.38933	5.942	2.917	18.827	0.362359	1.1452	1.90842	4.83431
506	1.408	1.512	0.843	5.714	5.264	7.007	5.264	1.951	1.685	12.836	20.536	22.325	1.25433	5.995	2.96667	18.5657	0.36	0.904839	1.99399	5.04202
507	1.616	1.698	0.808	6.17	5.035	7.083	5.035	1.908	2.072	12.458	20.267	21.906	1.374	6.096	3.005	18.2103	0.491882	1.026	1.75994	5.04862
508	1.945	1.716	1.184	6.477	5.365	7.552	5.341	2.26	1.982	12.421	20.553	22.052	1.615	6.46467	3.19433	18.342	0.390424	1.09355	1.86426	5.18222
509	2.087	1.882	1.062	6.02	5.188	7.444	5.296	2.015	1.798	12.764	20.376	21.993	1.677	6.21733	3.03633	18.3777	0.542379	1.14087	1.95993	4.92835
510	1.951	1.654	0.88	6.091	5.115	7.221	5.199	2.308	2.082	12.872	20.307	21.961	1.495	6.14233	3.19633	18.38	0.55292	1.05394	1.73804	4.84123
511	1.73	1.917	1.028	6.065	4.908	7.444	5.177	2.209	1.811	12.563	19.633	21.9	1.55833	6.139	3.06567	18.032	0.468703	1.26962	1.83927	4.87004
512	1.965	1.706	1.188	6.318	5.118	7.435	5.341	2.153	1.953	12.976	20.376	22.424	1.61967	6.29033	3.149	18.592	0.395629	1.15875	1.90096	4.97023
513	2.109	1.866	1.194	5.875	5.168	7.717	5.55	2.144	1.784	12.816	19.78	22.039	1.723	6.25333	3.15933	18.2117	0.473965	1.31594	2.07819	4.80736
514	1.676	1.963	0.987	6.152	5.452	7.507	5.51	2.055	1.802	12.959	20.248	21.373	1.542	6.37033	3.12233	18.1933	0.501608	1.04475	2.07165	4.56783
515	2.105	1.798	1.218	6.202	5.44	7.602	5.235	2.492	2.265	12.94	20.815	22.408	1.707	6.41467	3.33067	18.721	0.450448	1.09658	1.6531	5.06946
516	1.806	1.463	0.931	6.417	4.721	7.614	5.807	2.194	1.662	12.867	20.115	21.911	1.4	6.25067	3.221	18.2977	0.440889	1.45365	2.25528	4.78806
517	1.737	1.351	0.783	6.198	4.932	7.613	5.469	2.338	1.973	12.471	19.773	21.724	1.29033	6.24767	3.26	17.9893	0.479885	1.34119	1.92174	4.87756
518	1.86	1.765	1.152	6.637	5.274	7.831	5.696	2.304	2.029	12.45	19.943	21.909	1.59233	6.58067	3.343	18.1007	0.384287	1.27943	2.04239	4.99137
519	1.904	1.811	1.297	6.258	5.249	7.894	5.589	2.305	2.182	13.082	20.821	22.406	1.67067	6.467	3.35867	18.7697	0.326929	1.33483	1.9325	4.98901
520	2.168	2.188	1.084	6.211	5.254	8.105	5.625	2.607	2.158	13.164	20.566	21.836	1.81333	6.52333	3.46333	18.522	0.6317	1.45094	1.88547	4.68341
521	1.99	1.788	1.11	6.558	5.246	7.759	5.714	2.513	1.99	12.281	20.187	21.361	1.62933	6.521	3.40567	17.943	0.460957	1.25691	2.01611	4.93845
522	1.912	1.752	1.072	6.434	5.094	8.016	5.898	2.422	1.761	12.895	20.912	22.35	1.57867	6.51467	3.36033	18.719	0.446019	1.46267	2.2224	5.09472
523	1.996	1.886	1.138	6.574	5.521	8.137	5.742	2.574	1.954	12.452	19.757	22.144	1.67333	6.744	3.42333	18.1177	0.466863	1.31626	2.03181	5.04968
524	2.047	1.859	1.036	6.501	5.413	8.068	5.952	2.569	2.33	13.455	20.358	22.482	1.64733	6.66067	3.617	18.765	0.53771	1.33468	2.0257	4.71963
525	1.83	1.848	1.046	6.868	5.5	8.211	5.517	2.397	1.857	12.804	20.474	22.191	1.57467	6.85967	3.257	18.4897	0.457927	1.35552	1.97575	4.99821
526	1.818	1.856	1.066	6.606	5.531	8.291	5.778	2.903	1.885	13.165	20.143	22.275	1.58	6.80933	3.522	18.5277	0.445542	1.39119	2.01897	4.76498
527	1.915	1.662	1.175	6.617	5.401	8.137	5.492	2.614	2.28	12.524	20.347	22.008	1.584	6.71833	3.462	18.293	0.376116	1.37081	1.76595	5.06466
528	2.089	2.034	1.006	6.558	5.67	8.43	6.136	2.684	2.056	12.704	20.528	22.054	1.70967	6.886	3.62533	18.4287	0.610013	1.40893	2.19686	5.01608
529	1.878	1.733	1.151	6.484	5.377	7.837	5.601	2.515	2.348	12.677	20.38	22.817	1.58733	6.566	3.488	18.6247	0.384768	1.23205	1.83182	5.293
530	1.89	1.627	0.974	6.473	4.857	8.294	5.476	2.52	2.039	12.51	19.613	22.225	1.497	6.54133	3.345	18.116	0.471634	1.71952	1.8611	5.02753
531	2.196	1.856	1.104	6.729	5.496	8.409	5.661	2.783	2.29	12.519	20.094	21.961	1.71867	6.878	3.578	18.1913	0.558803	1.4622	1.82069	5.00029
532	2.292	1.831	1.359	6.533	5.481	8.269	5.588	2.67	2.174	12.369	20.26	22.185	1.82733	6.761	3.47733	18.2713	0.466511	1.40791	1.84464	5.2014
533	1.99	2.001	0.977	6.841	5.957	8.133	5.969	2.606	2.408	12.868	20.105	21.827	1.656	6.977	3.661	18.2667	0.588057	1.09436	2.00124	4.754
534	2.002	1.868	0.984	6.655	5.425	8.188	5.582	2.931	2.148	12.707	19.62	21.834	1.618	6.756	3.55367	18.0537	0.553133	1.38427	1.79969	4.76084
535	1.721	1.855	1.133	6.553	5.513	8.346	5.42	2.823	2.081	12.962	19.876	22.36	1.56967	6.804	3.44133	18.3993	0.384054	1.43308	1.75328	4.86991
536	2.14	2.249	1.274	6.906	5.483	8.359	6.03	2.816	2.239	13.026	20.519	22.201	1.88767	6.916	3.695	18.582	0.534238	1.43803	2.04265	4.88458
537	2.59	1.915	1.29	6.591	5.845	8.737	6.036	2.822	2.439	13.262	20.417	22.292	1.93167	7.05767	3.76567	18.657	0.65016	1.50142	1.97547	4.76534
538	1.929	1.82	1.246	6.945	5.602	8.723	5.862	2.6	2.34	13.046	20.154	22.462	1.665	7.09	3.60067	18.554	0.366935	1.56554	1.96268	4.90767
539	2.146	2.146	1.362	6.991	5.436	9.113	5.906	3.158	2.085	13.211	20.287	21.962	1.88467	7.18	3.71633	18.4867	0.452643	1.84577	1.97074	4.64499
540	2.189	2.189	1.146	7.249	5.446	8.897	5.652	3.244	2.369	13.197	20.651	22.132	1.84133	7.19733	3.755	18.66	0.602176	1.72608	1.70011	4.7887
541	2.261	1.786	1.041	6.848	5.718	8.39	5.705	2.917	2.3	13.157	19.902	21.573	1.696	6.98533	3.64067	18.2107	0.614959	1.34128	1.81419	4.45564
542	1.974	2.103	1.09	7.051	5.769	8.41	5.487	2.769	2.026	12.346	20	21.487	1.72233	7.07667	3.42733	17.9443	0.551402	1.32069	1.822	4.90498
543	2.194	1.794	1.187	7.073	5.563	8.686	5.924	2.956	2.414	13.436	20.418	21.877	1.725	7.10733	3.76467	18.577	0.507034	1.56178	1.88957	4.51161
544	2.193	2.029	1.141	6.974	5.82	8.787	5.87	3.005	2.422	12.704	20.337	21.669	1.78767	7.19367	3.76567	18.2367	0.566001	1.49565	1.84557	4.83749
545	2.186	2.371	1.396	6.83	5.644	8.83	6.2	3.125	2.618	12.844	19.97	22.193	1.98433	7.10133	3.981	18.3357	0.51784	1.61024	1.93836	4.88408
546	2.583	2.347	1.639	6.967	5.725	8.756	6.197	3.217	2.459	13.028	20.231	21.485	2.18967	7.14933	3.95767	18.248	0.491273	1.5237	1.97601	4.56393
547	2.305	2.48	1.333	7.377	5.894	9.022	6.255	3.227	2.343	12.872	20.249	22.293	2.03933	7.431	3.94167	18.4713	0.617929	1.5647	2.05158	4.95569
548	2.092	1.981	1.366	6.953	5.476	8.799	6.079	3.507	2.634	13.217	20.231	22.053	1.813	7.076	4.07333	18.5003	0.391072	1.66491	1.79097	4.66531
549	2.272	1.784	1.356	6.851	5.84	9.135	5.71	3.247	2.7	12.668	20.126	22.136	1.804	7.27533	3.88567	18.31	0.458327	1.68799	1.60342	4.9884
550	2.242	2.218	1.248	6.847	5.902	9.198	6.289	3.32	2.46	13.039	20.407	21.68	1.90267	7.31567	4.023	18.3753	0.567085	1.69724	2.00897	4.66503
551	2.455	2.25	1.42	7.016	5.921	9.218	6.39	3.297	2.467	12.972	20.542	22.455	2.04167	7.385	4.05133	18.6563	0.54805	1.67919	2.06743	5.01484
552	2.227	2.438	1.348	6.975	5.72	9.038	6.447	3.141	2.309	12.871	20.572	21.217	2.00433	7.24433	3.96567	18.22	0.578109	1.67532	2.18879	4.64358
553	2.158	2.369	1.067	7.366	5.9	9.336	6.334	3.214	2.24	13.078	20.854	21.757	1.86467	7.534	3.92933	18.563	0.698809	1.72415	2.13869	4.77156
554	2.421	2.364	1.538	7.081	5.678	8.777	6.334	3.28	2.602	12.555	20.032	21.468	2.10767	7.17867	4.072	18.0183	0.494168	1.55181	1.98807	4.78555
555	2.076	2.227	1.45	7.319	5.44	9.314	6.055	3.422	2.784	12.934	20.392	21.703	1.91767	7.35767	4.087	18.343	0.411988	1.93729	1.73393	4.72997
556	2.8	2.429	1.552	7.758	5.937	9.231	6.308	3.812	2.766	13.459	20.047	21.992	2.26033	7.642	4.29533	18.4993	0.640868	1.65006	1.81979	4.47208
557	2.739	2.415	1.766	7.479	5.757	8.932	6.171	3.432	2.884	12.633	19.821	21.52	2.30667	7.38933	4.16233	17.9913	0.495464	1.5894	1.761	4.71757
558	2.453	2.476	1.294	7.304	5.672	9.014	6.392	3.432	2.678	12.852	20.189	21.776	2.07433	7.33	4.16733	18.2723	0.675886	1.67115	1.96316	4.76074
559	2.404	2.731	1.512	7.482	6.026	9.423	6.805	3.747	2.878	13.17	20.618	22.311	2.21567	7.64367	4.47667	18.6997	0.630946	1.70426	2.06268	4.86307
560	2.647	2.713	1.461	7.436	5.953	8.941	6.711	3.757	2.878	12.884	20.266	21.32	2.27367	7.44333	4.44867	18.1567	0.704563	1.49401	2.00793	4.59657
561	2.571	2.461	1.38	6.887	6.081	9.337	6.699	3.642	2.693	13.001	20.042	21.488	2.13733	7.435	4.34467	18.177	0.658172	1.69576	2.0934	4.54048
562	2.833	2.593	1.656	7.278	6.102	9.392	6.418	3.628	2.975	13.205	20.418	22.02	2.36067	7.59067	4.34033	18.5477	0.621946	1.66714	1.8287	4.69571
563	2.649	2.864	1.691	7.451	5.976	9.131	6.482	3.919	2.907	13.061	20.017	21.342	2.40133	7.51933	4.436	18.14	0.624489	1.57861	1.84272	4.44816
564	2.85	2.708	1.719	7.179	6.156	9.593	6.526	4.166	3.285	13.074	20.339	22.178	2.42567	7.64267	4.659	18.5303	0.616096	1.76479	1.6758	4.81395
565	2.298	2.535	1.439	7.389	5.971	9.236	6.551	3.856	2.814	12.684	20.116	21.759	2.09067	7.532	4.407	18.1863	0.576667	1.63719	1.92847	4.83545
566	2.831	3.055	1.554	7.312	5.971	9.377	6.557	3.874	2.863	12.709	19.957	21.32	2.48	7.55333	4.43133	17.9953	0.809723	1.71578	1.90902	4.62855
567	2.955	3.04	2.019	7.227	6.122	9.682	7.195	4.134	3.188	12.403	20.459	21.745	2.67133	7.677	4.839	18.2023	0.566534	1.82216	2.09446	5.06336
568	3.057	2.973	1.754	7.679	5.987	9.412	6.66	3.761	3.298	13.277	20.399	21.891	2.59467	7.69267	4.573	18.5223	0.729249	1.71254	1.82216	4.60344
569	2.87	3.172	1.643	7.456	6.115	9.38	6.718	4.035	2.974	12.978	20.31	21.287	2.56167	7.65033	4.57567	18.1917	0.809792	1.64115	1.92967	4.54152
570	3.116	2.714	1.972	7.346	5.904	9.37	6.922	4.049	3.286	13.208	20.606	22.302	2.60067	7.54	4.75233	18.7053	0.58036	1.74112	1.91732	4.83576
571	2.946	2.781	1.803	7.015	5.377	9.446	6.829	4.079	3.183	12.783	20.179	21.457	2.51	7.27933	4.697	18.1397	0.617813	2.04734	1.89994	4.68281
572	3.041	2.886	1.757	7.56	6.112	9.666	6.605	3.914	3.195	13.015	20.021	21.376	2.56133	7.77933	4.57133	18.1373	0.700871	1.78712	1.79752	4.48751
573	3.265	3.224	1.771	7.442	5.958	9.356	7.032	4.156	3.224	12.898	20.135	21.691	2.75333	7.58533	4.804	18.2413	0.850973	1.70353	1.98498	4.69241
574	2.996	3.098	1.652	7.695	6.033	9.829	7.018	4.135	3.211	12.753	20.417	21.401	2.582	7.85233	4.788	18.1903	0.807017	1.90288	1.98573	4.7345
575	3.348	3.637	2.164	7.686	6.027	9.788	6.985	4.234	3.369	13.353	20.441	21.492	3.04967	7.83367	4.86267	18.4287	0.780503	1.88484	1.88819	4.42696
576	3.454	3.759	1.94	7.427	6.157	9.804	7.193	4.765	3.403	12.892	20.563	21.335	3.051	7.796	5.12033	18.2633	0.974165	1.85129	1.91982	4.6677
577	3.581	3.551	2.032	7.685	6.025	9.897	7.031	4.446	3.621	12.513	19.946	21.203	3.05467	7.869	5.03267	17.8873	0.885782	1.94255	1.77909	4.69655
578	3.323	3.577	2.134	7.845	6.229	9.948	6.91	4.624	3.536	13.037	20.14	22.528	3.01133	8.00733	5.02333	18.5683	0.770334	1.86481	1.72208	4.93684
579	3.757	3.777	2.202	7.848	6.141	9.969	7.363	4.535	3.676	13.1	20.099	22.361	3.24533	7.986	5.19133	18.52	0.903609	1.91773	1.92914	4.82819
580	3.569	4.125	2.254	7.541	6.531	10.099	7.248	4.67	3.649	13.334	20.319	21.28	3.316	8.057	5.189	18.311	0.960816	1.83912	1.85478	4.33691
581	3.849	3.778	2.323	7.95	6.445	9.961	7.193	4.809	3.617	12.506	20.275	21.992	3.31667	8.11867	5.20633	18.2577	0.861273	1.76406	1.82081	5.05453
582	3.942	4.141	2.485	7.993	6.087	9.839	7.614	4.411	3.872	13.063	20.277	21.784	3.52267	7.973	5.299	18.3747	0.904137	1.87608	2.02288	4.66134
583	3.974	4.065	2.259	7.505	6.224	10.339	7.081	4.983	3.44	13.052	20.224	21.939	3.43267	8.02267	5.168	18.405	1.01744	2.10578	1.82754	4.71447
584	4.479	4.747	2.884	7.908	6.719	10.128	7.373	4.836	3.865	12.665	20.444	21.286	4.03667	8.25167	5.358	18.1317	1.00719	1.73029	1.81132	4.75295
585	4.296	4.516	2.568	7.853	6.085	10.091	7.713	4.856	3.976	12.749	20.082	21.351	3.79333	8.00967	5.515	18.0607	1.06686	2.00759	1.95372	4.64359
586	4.392	4.744	2.935	7.94	6.442	10.332	7.417	5.256	3.98	13.317	20.683	21.377	4.02367	8.238	5.551	18.459	0.9591	1.96205	1.73739	4.4666
587	4.682	4.954	2.723	7.697	6.773	10.179	7.777	5.165	4.23	12.791	19.865	21.031	4.11967	8.21633	5.724	17.8957	1.21717	1.76139	1.83839	4.45905
588	4.585	5.558	2.868	7.979	6.53	10.232	7.275	5.25	4.407	12.902	20.067	21.655	4.337	8.247	5.644	18.208	1.36204	1.86549	1.47404	4.66322
589	4.735	5.342	3.025	7.851	6.677	10.593	7.376	5.322	4.452	13.031	20.579	21.651	4.36733	8.37367	5.71667	18.4203	1.20146	2.00964	1.50142	4.69798
590	4.628	5.174	3.366	7.358	6.455	10.089	7.756	4.657	4.429	13.009	19.523	21.251	4.38933	7.96733	5.614	17.9277	0.927328	1.89208	1.85853	4.34643
591	5.035	5.6	3.409	7.691	6.521	10.248	7.81	4.965	4.549	12.963	20.188	21.407	4.68133	8.15333	5.77467	18.186	1.13751	1.90603	1.77488	4.56413
592	5.376	5.831	3.638	7.912	6.7	10.449	7.862	5.224	4.436	12.551	20.806	21.16	4.94833	8.35367	5.84067	18.1723	1.15736	1.91313	1.79432	4.87143
593	5.173	6.092	3.432	7.902	6.488	10.098	7.714	5.173	4.312	13.184	20.206	21.333	4.899	8.16267	5.733	18.241	1.351	1.81906	1.76879	4.41559
594	5.465	6.486	3.924	7.978	6.476	10.26	7.578	5.095	4.705	13.233	20.781	21.401	5.29167	8.238	5.79267	18.4717	1.28977	1.90535	1.55839	4.5474
595	5.401	6.438	4.04	7.869	6.62	10.136	7.718	5.28	4.605	12.625	19.97	21.804	5.293	8.20833	5.86767	18.133	1.20264	1.78239	1.63759	4.85741
596	5.984	6.723	4.273	7.836	6.297	10.216	7.847	5.366	4.556	12.808	19.986	20.735	5.66	8.11633	5.923	17.843	1.25672	1.97448	1.71475	4.37649
597	6.133	7.386	4.694	8.3	6.975	10.416	8.156	5.547	5.136	13.107	20.74	21.715	6.071	8.56367	6.27967	18.5207	1.34707	1.73559	1.6379	4.71365
598	6.15	7.895	5.054	7.935	6.549	10.476	8.054	5.572	4.904	13.178	20.664	21.571	6.36633	8.32	6.17667	18.471	1.4328	1.99161	1.65977	4.60625
599	6.651	8	5.003	8.099	6.561	10.626	8.199	5.533	5.023	13.143	20.154	21.662	6.55133	8.42867	6.25167	18.3197	1.50098	2.05245	1.70561	4.54609
600	6.526	7.89	4.978	7.788	6.383	10.374	7.849	5.284	5.121	12.644	20.442	21.348	6.46467	8.18167	6.08467	18.1447	1.45697	2.02441	1.53013	4.78521
601	6.695	8.411	5.956	7.573	6.565	10.336	8.032	5.667	5.188	12.801	19.735	21.141	7.02067	8.158	6.29567	17.8923	1.25948	1.95238	1.52266	4.46491
602	6.793	8.93	6	7.967	6.713	11.027	8.148	5.529	5.278	12.713	20.008	21.724	7.241	8.569	6.31833	18.1483	1.5155	2.21911	1.5895	4.78469
603	7.459	9.199	6.309	8.009	7.029	10.279	8.329	6.259	5.329	13.139	20.278	21.908	7.65567	8.439	6.639	18.4417	1.455	1.66712	1.53568	4.664
604	6.994	9.836	6.671	8.112	6.46	10.723	8.556	5.774	5.361	13.292	20.337	21.647	7.83367	8.43167	6.56367	18.4253	1.74158	2.1494	1.73772	4.49359
605	7.63	10.048	7.203	8.237	6.476	10.844	8.257	5.929	5.521	12.764	20.424	21.439	8.29367	8.519	6.569	18.209	1.53422	2.19761	1.47602	4.74274
606	8.158	10.013	7.573	8.178	6.958	10.537	8.319	6.06	5.506	13.3	20.914	21.498	8.58133	8.55767	6.62833	18.5707	1.27389	1.81946	1.49013	4.57386
607	7.75	10.714	7.942	7.801	6.41	10.512	8.607	5.694	5.563	12.961	20.298	21.397	8.802	8.241	6.62133	18.2187	1.65862	2.0861	1.72088	4.58631
608	8.017	10.735	7.987	7.739	6.767	10.696	8.165	6.132	5.209	12.839	19.903	21.431	8.913	8.40067	6.502	18.0577	1.57797	2.04637	1.51234	4.58362
609	8.535	11.575	8.526	8.328	6.704	10.981	8.466	6.387	5.812	12.902	20.151	21.269	9.54533	8.671	6.88833	18.1073	1.75775	2.15903	1.39622	4.54248
610	8.403	11.792	9.26	8.245	6.758	10.649	8.61	5.881	5.783	13.023	19.85	21.111	9.81833	8.55067	6.758	17.9947	1.76214	1.96343	1.60463	4.35151
611	8.817	12.032	9.665	8.254	6.972	10.789	8.915	6.361	5.897	13.205	20.345	21.371	10.1713	8.67167	7.05767	18.307	1.66623	1.94247	1.62514	4.44814
612	8.742	12.469	9.824	8.113	6.559	10.67	8.526	6.038	5.654	12.784	19.923	21.33	10.345	8.44733	6.73933	18.0123	1.91735	2.07579	1.55917	4.5822
613	9.353	12.375	10.726	8.523	6.528	10.854	8.889	6.044	5.956	12.869	20.188	21.491	10.818	8.635	6.963	18.1827	1.5131	2.16517	1.66855	4.64766
614	9.487	13.139	10.515	8.048	6.736	10.789	8.89	5.962	6.011	13.129	20.394	20.991	11.047	8.52433	6.95433	18.1713	1.88323	2.06806	1.67652	4.37698
615	9.385	13.157	11.119	7.977	6.382	10.656	8.765	6.136	6.086	12.685	20.416	21.41	11.2203	8.33833	6.99567	18.1703	1.88804	2.15979	1.53249	4.77637
616	9.407	14.364	11.766	8.222	6.968	11.149	8.909	6.48	6.221	13.169	20.207	21.143	11.8457	8.77967	7.20333	18.173	2.47946	2.14556	1.48282	4.35879
617	9.939	13.985	11.853	8.223	7.092	10.891	9.244	6.011	6.159	13.142	19.996	21.067	11.9257	8.73533	7.138	18.0683	2.02398	1.95063	1.82535	4.29981
618	10.161	14.884	12.517	8.342	6.93	10.927	8.869	6.482	6.194	12.915	19.895	21.823	12.5207	8.733	7.18167	18.211	2.3615	2.02698	1.46835	4.68668
619	10.22	14.814	12.701	8.077	6.797	11.113	8.95	6.499	6.202	13.495	20.242	21.403	12.5783	8.66233	7.217	18.38	2.29946	2.21674	1.50815	4.27018
620	10.234	14.699	13.287	8.444	6.683	11.019	9.14	6.494	6.087	13.068	20.179	21.919	12.74	8.71533	7.24033	18.3887	2.28221	2.1807	1.6577	4.68925
621	10.338	15.268	13.28	8.141	7.038	10.964	9.135	6.402	6.262	13.26	19.831	21.481	12.962	8.71433	7.26633	18.1907	2.48034	2.02482	1.61983	4.34905
622	10.366	15.664	13.821	8.432	6.941	11.02	9.076	6.467	6.326	13.136	19.966	21.447	13.2837	8.79767	7.28967	18.183	2.68956	2.06394	1.54862	4.43311
623	10.965	15.566	14.543	8.279	6.735	10.614	9.151	6.445	6.735	13.24	20.216	21.329	13.6913	8.54267	7.44367	18.2617	2.41584	1.9529	1.48569	4.38435
624	10.93	16.16	14.765	8.09	6.825	11.252	9.304	6.514	6.625	13.129	19.934	21.63	13.9517	8.72233	7.481	18.231	2.7082	2.28023	1.57974	4.4991
625	10.874	15.756	15.096	8.543	7.043	11.224	9.434	6.773	6.553	12.765	19.808	21.499	13.9087	8.93667	7.58667	18.024	2.64874	2.11812	1.60361	4.63224
626	11.3	16.333	15.776	8.151	6.936	11.32	9.417	6.369	6.541	12.91	20.018	21.527	14.4697	8.80233	7.44233	18.1517	2.7591	2.26341	1.71227	4.60169
627	11.229	17.186	15.207	8.307	6.519	11.089	9.351	6.448	6.338	12.816	20.48	21.093	14.5407	8.63833	7.379	18.1297	3.03389	2.30295	1.70869	4.61197
628	11.129	17.091	15.98	8.541	6.981	11.496	9.336	7.053	6.625	13.31	20.383	21.637	14.7333	9.006	7.67133	18.4433	3.17049	2.29314	1.45744	4.48959
629	11.1	16.403	16.604	8.6	7.128	11.402	9.174	6.714	6.674	13.227	19.931	21.272	14.7023	9.04333	7.52067	18.1433	3.12133	2.17122	1.43197	4.31014
630	11.471	16.967	16.57	8.407	7.084	11.338	9.486	6.545	6.575	13.191	19.888	21.527	15.0027	8.943	7.53533	18.202	3.06495	2.17706	1.68939	4.41635
631	11.514	17.2	16.463	8.12	6.727	11.231	9.14	6.939	6.514	12.595	19.685	21.604	15.059	8.69267	7.531	17.9613	3.0921	2.30596	1.40954	4.7454
632	11.362	16.992	16.982	8.186	6.699	10.772	9.224	6.842	6.496	13.063	20.138	21.411	15.112	8.55233	7.52067	18.204	3.2476	2.06106	1.48524	4.4975
633	11.482	16.999	17.183	8.356	6.773	11.411	8.847	7.079	6.589	12.902	20.196	21.167	15.2213	8.84667	7.505	18.0883	3.23966	2.35761	1.18775	4.51766
634	11.892	17.931	18.138	8.934	7.399	11.705	9.806	7.222	7.316	13.593	20.017	22.144	15.987	9.346	8.11467	18.5847	3.54788	2.18237	1.46549	4.45181
635	11.87	17.919	18.26	8.825	6.844	11.55	9.589	6.947	7.164	12.779	19.953	21.852	16.0163	9.073	7.9	18.1947	3.59488	2.36278	1.46674	4.78525
636	11.917	17.783	18.082	8.881	7.019	11.711	9.416	6.947	6.813	13.245	20.047	21.241	15.9273	9.20367	7.72533	18.1777	3.47627	2.36258	1.46569	4.31333
637	12.592	18.217	18.113	8.801	7.114	11.613	9.52	7.208	7.176	13.436	20.279	22.008	16.3073	9.176	7.968	18.5743	3.21799	2.27282	1.34417	4.53312
638	12.459	17.988	18.703	9.077	7.137	11.815	9.16	7.293	6.94	13.309	20.425	21.763	16.3833	9.343	7.79767	18.499	3.41732	2.35032	1.19294	4.54419
639	12.282	17.631	18.351	8.935	7.893	11.792	9.467	7.695	7.215	13.586	20.811	21.896	16.088	9.54	8.12567	18.7643	3.31569	2.01868	1.18616	4.51726
640	12.199	18.12	19.056	8.981	6.962	11.736	9.496	7.435	7.141	13.556	21.033	21.79	16.4583	9.22633	8.024	18.793	3.71826	2.39644	1.28324	4.55114
641	12.601	18.549	19.089	9.545	7.694	11.749	9.129	7.288	7.008	13.641	20.441	21.439	16.7463	9.66267	7.80833	18.507	3.6001	2.03006	1.15227	4.24352
642	12.542	18.288	19.275	8.939	7.626	11.796	9.685	7.353	6.712	13.414	19.926	21.555	16.7017	9.45367	7.91667	18.2983	3.63602	2.13211	1.5646	4.30766
643	12.27	18.499	19.514	8.784	7.381	11.589	9.631	7.862	7.307	13.317	20.519	21.566	16.761	9.25133	8.26667	18.4673	3.92229	2.14257	1.2137	4.49094
644	12.618	18.25	19.117	9.194	7.778	12.057	9.807	7.989	7.44	13.907	20.522	22.382	16.6617	9.67633	8.412	18.937	3.52865	2.1799	1.2389	4.45428
645	12.202	17.846	19.443	8.975	7.441	12.118	10.131	7.872	7.346	13.652	20.389	21.734	16.497	9.51133	8.44967	18.5917	3.80432	2.38418	1.47964	4.33041
646	12.897	18.65	19.52	9.171	6.984	11.856	9.872	8.078	7.122	13.406	20.529	21.707	17.0223	9.337	8.35733	18.5473	3.59903	2.44024	1.39612	4.49131
647	13.056	18.848	19.968	9.664	7.648	12.096	9.899	7.797	7.051	13.973	20.608	21.931	17.2907	9.80267	8.249	18.8373	3.70984	2.22724	1.47682	4.26426
648	12.652	18.343	19.858	9.155	7.608	11.699	9.696	7.767	7.142	13.489	19.975	21.458	16.951	9.48733	8.20167	18.3073	3.79932	2.06565	1.33133	4.23817
649	12.484	17.863	20.004	9.193	7.616	12.133	9.683	8	7.403	13.954	20.537	21.496	16.7837	9.64733	8.362	18.6623	3.87444	2.29252	1.18232	4.10563
650	12.547	18.686	19.405	9.724	7.824	12.107	9.831	8.179	7.18	13.695	20.726	22.078	16.8793	9.885	8.39667	18.833	3.76909	2.14603	1.33884	4.5007
651	13.003	18.557	19.852	8.872	7.513	12.329	9.985	8.037	7.598	13.784	21.008	21.789	17.1373	9.57133	8.54	18.8603	3.63851	2.483	1.27051	4.41354
652	12.696	18.655	20.294	9.471	7.332	12.398	9.652	8.418	7.375	13.728	20.56	21.422	17.215	9.73367	8.48167	18.57	3.99845	2.54319	1.13983	4.21539
653	13.257	18.562	20.381	9.815	7.549	12.756	10.261	8.333	7.113	13.682	21.046	21.961	17.4	10.04	8.569	18.8963	3.70142	2.61078	1.58721	4.53886
654	13.374	19.078	19.712	10.012	7.391	12.225	9.872	7.939	7.423	13.976	20.421	21.689	17.388	9.876	8.41133	18.6953	3.49065	2.41987	1.29102	4.13594
655	12.981	18.628	20.253	9.844	7.735	12.425	9.72	8.301	7.282	13.979	20.51	21.765	17.2873	10.0013	8.43433	18.7513	3.81688	2.34896	1.22446	4.18033
656	12.815	19.243	20.142	9.606	7.996	12.616	10.097	8.759	7.285	13.724	20.79	21.564	17.4	10.0727	8.71367	18.6927	3.99609	2.34509	1.40655	4.32036
657	12.746	18.358	20.486	9.348	7.296	12.333	9.467	8.522	7.22	14.114	20.476	21.952	17.1967	9.659	8.403	18.8473	3.99855	2.53286	1.12822	4.16509
658	12.788	19.216	20.688	9.679	7.592	12.701	10.042	8.526	7.229	13.788	21.402	22.094	17.564	9.99067	8.599	19.0947	4.20111	2.56872	1.40792	4.60871
659	12.821	18.576	20.651	9.577	7.743	13.072	9.741	8.769	7.612	13.869	20.651	22.431	17.3493	10.1307	8.70733	18.9837	4.05657	2.7073	1.06584	4.51796
660	12.88	18.771	20.56	9.83	7.745	13.198	9.786	9.347	7.713	14.635	20.998	22.238	17.4037	10.2577	8.94867	19.2903	4.01843	2.75154	1.0924	4.07903
661	13.168	19.069	20.347	10.19	8.045	12.879	9.868	9.112	7.923	14.346	21.125	22.025	17.528	10.3713	8.96767	19.1653	3.82956	2.4221	0.9805	4.19785
662	13.742	18.148	20.324	9.836	7.464	12.665	9.977	9.455	7.312	14.275	20.923	21.456	17.4047	9.98833	8.91467	18.8847	3.35337	2.60384	1.41228	4.00097
663	13.196	18.391	20.48	9.936	7.825	12.964	9.936	8.974	7.615	14.578	20.922	22.491	17.3557	10.2417	8.84167	19.3303	3.75075	2.5831	1.16615	4.18974
664	13.338	18.473	20.896	10.492	8.014	13.238	10.081	9.581	7.603	14.338	21.207	22.241	17.569	10.5813	9.08833	19.262	3.85924	2.61315	1.31041	4.29554
665	13.513	19.014	20.533	10.205	7.91	12.995	10.205	9.485	7.64	14.458	21.366	22.694	17.6867	10.37	9.11	19.506	3.69343	2.54651	1.32298	4.42183
666	13.363	18.918	20.763	10.07	8.022	13.385	10.33	9.437	7.852	14.573	21.702	22.234	17.6813	10.4923	9.20633	19.503	3.85188	2.70633	1.255	4.27778
667	13.074	17.747	20.266	9.956	7.691	13.019	10.222	9.223	7.503	14.229	21.132	21.598	17.029	10.222	8.98267	18.9863	3.64936	2.67394	1.37534	4.12655
668	13.174	18.597	20.404	9.988	7.954	13.004	10.406	9.445	7.412	14.349	21.32	22.314	17.3917	10.3153	9.08767	19.3277	3.76269	2.54086	1.52865	4.3402
669	12.885	18.975	20.422	10.295	7.85	12.818	10.059	9.532	7.435	14.545	21.823	22.407	17.4273	10.321	9.00867	19.5917	3.99976	2.4841	1.38808	4.38029
670	13.455	18.536	20.076	10.51	7.981	13.231	10.049	9.667	7.801	14.388	21.335	22.055	17.3557	10.574	9.17233	19.2593	3.46472	2.62559	1.20287	4.23403
671	13.012	18.176	20.964	9.96	7.963	12.92	10.052	9.593	7.183	14.137	20.929	22.02	17.384	10.281	8.94267	19.0287	4.03473	2.49404	1.5411	4.27128
672	13.318	18.547	20.675	11.041	8.421	13.73	10.183	9.908	7.929	14.828	21.304	22.288	17.5133	11.064	9.34	19.4733	3.78586	2.65457	1.22967	4.05295
673	13.203	18.302	19.839	10.094	8.22	13.808	10.164	10.083	7.323	14.53	21.679	22.506	17.1147	10.7073	9.19	19.5717	3.47368	2.84404	1.61738	4.38575
674	13.718	18.342	20.88	10.365	8.373	13.113	10.399	10.015	7.395	14.743	20.974	22.161	17.6467	10.617	9.26967	19.2927	3.63128	2.38003	1.63482	3.98458
675	13.013	18.404	20.902	10.26	8.109	13.268	10.307	10.272	7.715	14.76	21.955	22.88	17.4397	10.5457	9.43133	19.865	4.03194	2.59134	1.48649	4.44519
676	13.71	18.876	20.266	10.811	8.029	13.569	10.496	10.402	7.959	14.797	21.692	22.838	17.6173	10.803	9.619	19.7757	3.45448	2.77001	1.43837	4.34956
677	13.541	17.566	20.758	10.432	7.663	13.248	10.455	10.15	7.287	14.187	21.65	21.978	17.2883	10.4477	9.29733	19.2717	3.6165	2.79253	1.74767	4.4065
678	13.804	18.817	20.646	10.501	8.351	13.97	10.501	10.121	7.508	14.445	22.06	22.927	17.7557	10.9407	9.37667	19.8107	3.54232	2.83518	1.62943	4.66698
679	13.824	18.753	20.404	10.772	8.397	13.539	10.238	10.808	7.637	15.428	21.01	23.064	17.6603	10.9027	9.561	19.834	3.42338	2.57349	1.69043	3.9515
680	13.331	18.494	21.149	11.413	8.421	13.295	10.291	10.532	7.806	14.851	22.041	23.441	17.658	11.043	9.543	20.111	3.97548	2.45798	1.5091	4.60876
681	13.615	18.145	20.596	10.442	8.099	13.41	9.925	10.803	7.546	14.792	22.038	22.35	17.452	10.6503	9.42467	19.7267	3.54172	2.66162	1.68516	4.27639
682	13.543	18.624	20.507	11.08	8.087	13.313	10.585	10.272	7.833	15.269	21.098	22.511	17.558	10.8267	9.56333	19.626	3.6023	2.62219	1.50666	3.83884
683	13.864	18.543	20.894	10.827	7.691	13.742	9.871	10.68	7.471	15.028	21.825	22.474	17.767	10.7533	9.34067	19.7757	3.57867	3.02617	1.66894	4.12439
684	13.6	18.337	20.631	11.194	8.115	13.7	10.097	10.957	7.666	14.71	21.603	22.339	17.5227	11.003	9.57333	19.5507	3.58554	2.79739	1.70685	4.20826
685	13.85	18.059	20.306	10.739	8.048	13.455	10.098	10.962	8.073	15.319	21.973	22.503	17.405	10.7473	9.711	19.9317	3.27731	2.70351	1.48287	4.00347
686	14	18.654	21.093	10.86	8.658	14.05	10.434	11.397	7.919	15.176	21.869	22.582	17.9157	11.1893	9.91667	19.8757	3.60368	2.71104	1.79579	4.08561
687	13.558	17.583	20.769	10.664	8.036	13.558	10.207	10.994	7.858	15.348	22.178	22.737	17.3033	10.7527	9.68633	20.0877	3.61363	2.76207	1.63155	4.11418
688	13.582	17.787	20.366	10.659	7.941	13.607	10.316	10.812	7.991	15.271	21.471	22.03	17.245	10.7357	9.70633	19.5907	3.42432	2.83378	1.50608	3.75137
689	14.124	18.691	20.813	11.461	8.773	13.7	10.831	11.075	7.911	15.809	22.215	23.72	17.876	11.3113	9.939	20.5813	3.41816	2.46691	1.76053	4.20091
690	13.899	18.118	20.467	10.918	7.975	13.782	10.388	10.918	7.704	15.163	21.603	23.138	17.4947	10.8917	9.67	19.968	3.32807	2.90359	1.72311	4.23144
691	13.424	18.843	20.65	11.189	8.694	14.451	10.773	11.683	8.07	15.27	22.456	22.703	17.639	11.4447	10.1753	20.143	3.76045	2.887	1.87919	4.22195
692	13.489	18.242	20.759	11.185	8.562	14.487	10.519	11.771	7.776	15.593	21.971	23.209	17.4967	11.4113	10.022	20.2577	3.69186	2.96898	2.04335	4.08687
693	13.927	17.193	20.275	10.911	8.319	13.411	10.66	11.89	7.34	15.487	21.968	22.616	17.1317	10.8803	9.96333	20.0237	3.17444	2.54614	2.35364	3.94221
694	13.806	17.784	19.549	11.29	8.299	13.371	10.644	11.909	8.075	15.242	21.618	22.355	17.0463	10.9867	10.2093	19.7383	2.9417	2.54957	1.95361	3.91134
695	14.035	18.074	20.359	11.274	8.609	13.967	10.254	11.451	8.038	15.3	22.209	22.997	17.4893	11.2833	9.91433	20.1687	3.20228	2.67901	1.73167	4.23476
696	13.426	18.358	19.772	11.279	8.534	13.399	10.11	12.094	8.208	15.41	21.457	23.006	17.1853	11.0707	10.1373	19.9577	3.33156	2.43918	1.94314	4.01383
697	13.863	18.02	21.021	11.757	9.169	14.014	11.151	11.867	7.778	15.721	22.852	23.1	17.6347	11.6467	10.2653	20.5577	3.59452	2.42438	2.18364	4.19051
698	13.485	18.061	20.614	11.149	8.569	13.675	10.388	11.814	7.496	15.345	22.135	22.882	17.3867	11.131	9.89933	20.1207	3.61202	2.55305	2.20009	4.15268
699	14.067	18.154	20.517	11.245	8.076	13.803	10.342	11.76	7.895	15.541	21.824	22.519	17.5793	11.0413	9.999	19.9613	3.26317	2.86893	1.9552	3.84386
700	13.808	18.289	20.171	11.28	9.018	14.075	10.662	11.898	8.035	15.789	22.264	23.627	17.4227	11.4577	10.1983	20.56	3.26877	2.53318	1.9728	4.18763
701	13.825	17.732	20.061	10.993	8.845	14.118	10.114	12.388	7.952	15.36	22.335	22.405	17.206	11.3187	10.1513	20.0333	3.1511	2.65154	2.21824	4.04738
702	14.12	17.702	20.095	11.419	8.984	13.952	10.747	11.867	8.018	15.869	22.138	23.006	17.3057	11.4517	10.2107	20.3377	3.00715	2.48416	1.97976	3.89424
703	13.917	18.067	20.213	11.252	8.515	14.652	10.373	11.886	7.967	15.315	22.461	23.095	17.399	11.473	10.0753	20.2903	3.20071	3.07446	1.97638	4.32041
704	13.421	16.949	19.859	11.07	8.833	13.851	9.98	12.088	7.27	14.927	22.297	22.742	16.743	11.2513	9.77933	19.9887	3.22394	2.51391	2.41526	4.38918
705	13.257	17.479	20.413	10.886	8.645	14.009	10.843	11.768	7.619	15.31	22.437	22.972	17.0497	11.18	10.0767	20.2397	3.59727	2.69406	2.17807	4.27759
706	14.014	17.583	19.953	11.849	8.733	14.307	10.796	12.039	7.665	15.301	22.776	22.689	17.1833	11.6297	10.1667	20.2553	2.9896	2.79347	2.25389	4.2908
707	14.237	17.752	20.278	11.165	8.433	13.499	10.191	11.667	7.887	15.67	22.271	22.995	17.4223	11.0323	9.915	20.312	3.03396	2.5356	1.90505	4.03636
708	13.248	17.611	20.143	11.345	8.432	14.376	10.16	11.653	8.022	15.181	22.149	23.188	17.0007	11.3843	9.945	20.1727	3.48778	2.9722	1.82502	4.35401
709	14.271	17.653	20.583	10.802	8.878	14.402	10.787	12.522	7.522	15.656	22.026	22.609	17.5023	11.3607	10.277	20.097	3.1587	2.80406	2.53872	3.85705
710	13.711	17.569	19.797	11.08	9.031	13.906	10.437	11.857	7.895	15.206	22.054	22.937	17.0257	11.339	10.063	20.0657	3.07917	2.4478	2.0073	4.23169
711	13.118	17.58	19.14	11.057	9.084	13.457	9.482	11.631	7.847	15.283	21.849	22.158	16.6127	11.1993	9.65333	19.7633	3.12537	2.18997	1.89781	3.88316
712	13.773	17.682	20.385	11.712	9.192	14.063	10.918	11.742	7.986	15.56	22.4	22.981	17.28	11.6557	10.2153	20.3137	3.32428	2.43599	1.97413	4.12703
713	13.542	17.416	20.533	11.348	8.821	14.178	11.03	11.999	8.004	15.827	22.212	23.059	17.1637	11.449	10.3443	20.366	3.50232	2.67993	2.08389	3.95364
714	13.509	17.452	19.704	11.076	9.036	14.506	10.32	12.285	7.872	15.805	22.182	22.847	16.8883	11.5393	10.159	20.278	3.13573	2.76428	2.2109	3.88798
715	13.865	17.728	20.353	11.331	8.992	14.62	10.878	11.512	8.087	16.068	22.42	23.295	17.3153	11.6477	10.159	20.5943	3.26363	2.82733	1.82219	3.94426
716	13.675	17.733	20.257	11.693	8.797	13.861	10.64	12.064	8.007	15.921	22.147	23.091	17.2217	11.4503	10.237	20.3863	3.32066	2.54071	2.0583	3.89579
717	13.592	17.15	20.147	11.829	8.926	13.951	10.659	12.219	7.74	15.746	21.801	23.205	16.963	11.5687	10.206	20.2507	3.2815	2.5226	2.2736	3.96381
718	13.048	17.786	19.532	11.193	9.026	13.624	10.366	12.143	7.638	15.729	21.902	22.79	16.7887	11.281	10.049	20.1403	3.35508	2.30026	2.26917	3.84604
719	13.298	17.286	19.813	11.058	8.595	14.045	10.677	12.409	7.817	15.65	22.45	22.514	16.799	11.2327	10.301	20.2047	3.28469	2.7292	2.31898	3.94459
720	14.161	18.057	19.382	11.752	8.859	14.274	10.782	11.866	7.016	16.279	22.276	23.101	17.2	11.6283	9.888	20.552	2.71395	2.70962	2.54559	3.72345
721	13.738	17.197	19.954	11.486	8.321	14.75	10.426	11.715	7.571	15.206	22.565	22.663	16.963	11.519	9.904	20.1447	3.1146	3.21463	2.12074	4.27729
722	13.123	17.306	19.111	11.368	8.793	14.452	10.991	11.959	7.841	15.469	22.031	23.048	16.5133	11.5377	10.2637	20.1827	3.07169	2.83331	2.15319	4.1137
723	13.744	17.287	20.303	10.745	8.701	14.634	9.888	12.327	7.729	15.425	21.704	22.989	17.1113	11.36	9.98133	20.0393	3.28303	3.01393	2.30042	4.04745
724	13.801	17.226	19.566	11.228	9.039	14.152	10.76	12.03	7.937	15.656	22.289	23.208	16.8643	11.473	10.2423	20.3843	2.89947	2.56529	2.09503	4.12056
725	13.154	18.17	19.1	11.427	7.889	14.566	10.463	12.191	7.64	15.695	21.741	22.853	16.808	11.294	10.098	20.0963	3.19844	3.34049	2.29735	3.852
726	12.857	17.375	19.12	11.445	8.638	14.485	9.834	11.794	7.442	15.432	22.392	22.674	16.4507	11.5227	9.69	20.166	3.2322	2.92427	2.17957	4.10219
727	13.382	17.042	19.709	11.51	9.192	14.26	10.235	11.61	8.016	15.171	21.464	22.806	16.711	11.654	9.95367	19.8137	3.17646	2.53707	1.81344	4.07627
728	13.431	17.719	19.016	11.27	8.777	14.345	10.805	12.434	8.178	15.01	21.842	23.487	16.722	11.464	10.4723	20.113	2.92294	2.78906	2.14741	4.49522
729	13.655	17.219	19.534	11.357	8.859	14.754	10.325	10.691	7.394	15.82	21.982	22.398	16.8027	11.6567	9.47	20.0667	2.96153	2.9589	1.80716	3.6836
730	13.336	17.124	19.408	10.92	8.57	13.716	10.87	12.326	7.842	15.189	21.145	22.386	16.6227	11.0687	10.346	19.5733	3.06689	2.57622	2.28746	3.84731
731	13.274	16.708	18.965	10.635	8.08	14.335	10.718	11.963	7.616	15.099	21.802	22.615	16.3157	11.0167	10.099	19.8387	2.86571	3.14492	2.23863	4.12475
732	13.84	17.686	19.001	11.259	8.974	14.168	10.815	11.966	7.774	15.516	22.091	22.387	16.8423	11.467	10.185	19.998	2.68194	2.60324	2.16585	3.88435
733	13.771	17.276	19.269	11.86	8.987	14.435	10.631	12.043	7.94	15.748	20.947	23.173	16.772	11.7607	10.2047	19.956	2.78344	2.72536	2.08446	3.81041
734	13.02	17.028	18.718	11.529	8.763	14.378	10.817	11.115	7.437	15.206	21.65	22.163	16.2553	11.5567	9.78967	19.673	2.92653	2.8076	2.04291	3.87703
735	12.933	16.95	18.717	11.683	8.933	14.6	11	12.017	7.767	15.7	21.983	22.417	16.2	11.7387	10.2613	20.0333	2.96404	2.83391	2.2192	3.75905
736	13.758	17.471	19.625	11.653	9.1	14.487	10.758	11.951	8.105	15.482	21.565	22.742	16.9513	11.7467	10.2713	19.9297	2.96782	2.69472	1.96864	3.89649
737	13.916	17.395	19.076	11.731	9.143	13.849	10.756	11.21	7.092	15.244	21.076	22.084	16.7957	11.5743	9.686	19.468	2.63169	2.35691	2.25791	3.69265
738	13.375	16.961	18.882	11.047	8.515	13.987	10.605	11.353	8.039	15.432	21.142	22.553	16.406	11.183	9.999	19.709	2.79514	2.73853	1.73812	3.77058
739	14.34	16.976	18.432	11.098	9.676	13.941	11.011	12.207	8.046	15.259	22.299	23.409	16.5827	11.5717	10.4213	20.3223	2.07416	2.1716	2.14226	4.41996
740	13.455	17.714	19.913	11.431	9.372	14.956	10.75	12.426	7.906	15.986	22.653	23.508	17.0273	11.9197	10.3607	20.7157	3.2833	2.82389	2.28501	4.11826
741	13.76	16.738	18.381	11.005	8.164	13.794	10.252	11.638	6.983	14.513	21.102	22.523	16.293	10.9877	9.62433	19.3793	2.34242	2.81504	2.39013	4.27384
742	13.762	16.538	18.595	11.62	8.535	13.676	10.557	11.894	7.438	15.356	21.491	22.211	16.2983	11.277	9.963	19.686	2.4254	2.58761	2.28662	3.76713
743	13.989	16.787	18.916	11.596	9.344	14.394	10.417	11.191	7.707	15.362	22.066	22.84	16.564	11.778	9.77167	20.0893	2.47106	2.52991	1.82945	4.11224
744	12.873	16.586	18.182	10.999	8.952	14.781	9.958	11.225	7.287	15.493	20.507	22.207	15.8803	11.5773	9.49	19.4023	2.72394	2.95722	2.01028	3.49065
745	13.519	16.93	19.026	11.601	8.687	14.745	10.517	11.832	7.71	15.385	22.064	22.633	16.4917	11.6777	10.0197	20.0273	2.77954	3.02973	2.10552	4.03043
746	13.289	17.017	19.226	11.398	8.729	15.038	10.603	11.84	7.846	14.791	21.735	22.99	16.5107	11.7217	10.0963	19.8387	3.00071	3.16693	2.04464	4.41622
747	13.415	17.031	19.888	11.969	9.347	14.265	10.685	11.969	7.575	14.88	21.443	22.473	16.778	11.8603	10.0763	19.5987	3.24391	2.4608	2.25935	4.11881
748	13.962	17.125	19.407	11.482	9.883	13.89	10.458	12.111	7.116	15.31	21.563	22.174	16.8313	11.7517	9.895	19.6823	2.73435	2.01707	2.54465	3.79886
749	13.959	17.329	19.363	11.76	9.251	14.105	11.486	11.724	8.078	15.168	21.616	22.806	16.8837	11.7053	10.4293	19.8633	2.72939	2.42746	2.03979	4.10958
750	13.442	17.102	19.253	11.732	9.562	13.865	10.739	11.493	7.576	15.355	20.761	22.729	16.599	11.7197	9.936	19.615	2.93797	2.15153	2.0783	3.81824
751	13.233	16.919	18.669	11.39	8.644	14.025	10.56	11.021	7.538	14.836	21.563	22.964	16.2737	11.353	9.70633	19.7877	2.77486	2.69069	1.89193	4.34511
752	13.69	16.851	19.394	11.464	9.258	14.812	10.08	11.782	7.78	15.897	21.358	21.919	16.645	11.8447	9.88067	19.7247	2.85757	2.7965	2.00843	3.3267
753	13.676	16.927	18.692	10.746	8.717	14.296	10.295	11.103	6.895	14.71	20.778	22.055	16.4317	11.253	9.431	19.181	2.54442	2.82384	2.23309	3.92429
754	13.632	17.579	18.646	11.802	9.685	14.337	11.249	10.848	7.588	15.157	21.03	22.688	16.619	11.9413	9.895	19.625	2.64126	2.32913	2.00796	3.95721
755	13.184	16.85	18.503	12.12	9.062	14.4	10.372	12.006	7.732	15.312	21.429	22.72	16.179	11.8607	10.0367	19.8203	2.72225	2.67843	2.15664	3.95733
756	13.85	17.172	18.357	11.364	9.751	14.258	10.82	11.81	8.275	16.084	22.009	23.193	16.4597	11.791	10.3017	20.4287	2.33641	2.28364	1.82361	3.80888
757	13.222	17.478	18.877	11.764	9.143	14.187	10.621	11.823	7.764	14.522	21.675	22.424	16.5257	11.698	10.0693	19.5403	2.94533	2.52265	2.08498	4.36211
758	13.092	16.923	18.898	11.276	8.886	14.159	10.446	11.394	7.405	15.324	21.11	22.927	16.3043	11.4403	9.74833	19.787	2.95203	2.64034	2.08401	3.97041
759	13.561	16.313	18.082	11.006	8.569	14.072	10.22	10.711	7.252	14.721	21.364	21.777	15.9853	11.2157	9.39433	19.2873	2.27824	2.75748	1.87149	3.95995
760	14.004	17.248	18.497	11.848	9.188	14.185	10.86	11.525	7.576	15.575	21.257	23.393	16.583	11.7403	9.987	20.075	2.31914	2.50024	2.1143	4.04081
761	13.049	16.911	17.724	11.565	8.943	14.248	10.061	11.951	7.337	14.919	20.813	22.52	15.8947	11.5853	9.783	19.4173	2.49772	2.65256	2.31953	3.98807
762	13.216	16.788	18.27	10.881	8.749	14.454	10.8	11.713	7.714	15.713	21.214	21.945	16.0913	11.3613	10.0757	19.624	2.59803	2.88267	2.09559	3.40669
763	13.008	17.357	18.12	10.905	8.823	14.925	11.07	11.977	7.895	15.42	22.181	23.129	16.1617	11.551	10.314	20.2433	2.75767	3.10187	2.14344	4.20394
764	14.073	16.639	18.605	11.403	9.147	14.88	9.996	11.155	7.719	14.673	20.964	22.289	16.439	11.81	9.62333	19.3087	2.27261	2.88809	1.74805	4.0689
765	13.717	16.649	18.408	11.644	8.628	13.822	10.639	11.309	7.707	15.183	20.88	22.743	16.258	11.3647	9.885	19.602	2.36982	2.60824	1.91572	3.9387
766	13.569	16.279	17.645	10.838	9.26	13.975	10.924	11.095	7.062	14.295	20.888	22.125	15.831	11.3577	9.69367	19.1027	2.0746	2.40007	2.28069	4.20925
767	13.124	16.283	18.395	11.716	9.134	14.639	10.521	11.481	7.768	15.45	21.084	22.258	15.934	11.8297	9.92333	19.5973	2.65277	2.75426	1.9273	3.63935
768	13.996	16.856	18.1	11.048	8.908	14.978	10.983	11.463	7.576	14.956	20.83	22.576	16.3173	11.6447	10.0073	19.454	2.10436	3.07867	2.11923	3.99201
769	13.817	17.206	18.566	11.939	9.585	14.637	10.859	11.183	7.556	14.68	21.114	22.69	16.5297	12.0537	9.866	19.4947	2.44567	2.52795	2.00707	4.24343
770	13.513	16.339	16.913	11.526	9.229	13.756	10.024	10.687	7.11	14.286	21.042	21.881	15.5883	11.5037	9.27367	19.0697	1.82006	2.26358	1.90289	4.16396
771	13.652	16.941	18.27	11.309	8.921	14.012	10.543	10.498	7.321	14.553	21.514	22.73	16.2877	11.414	9.454	19.599	2.37731	2.54712	1.84737	4.41206
772	12.892	16.258	17.449	11.083	9.434	14.174	9.32	10.808	7.694	14.518	21.021	22.304	15.533	11.5637	9.274	19.281	2.36343	2.40628	1.55751	4.17446
773	12.434	16.167	17.586	10.671	9.572	13.51	10.877	10.74	6.916	14.793	20.54	21.388	15.3957	11.251	9.511	18.907	2.6612	2.03206	2.24838	3.58797
774	13.312	16.043	18.338	10.971	8.699	13.863	10.856	11.269	6.931	15.745	21.047	21.597	15.8977	11.1777	9.68533	19.463	2.51615	2.5882	2.39424	3.2316
775	14.124	16.294	18.117	11.17	9.116	14.54	10.362	10.893	7.547	14.009	21.348	22.479	16.1783	11.6087	9.60067	19.2787	1.99901	2.73848	1.79824	4.59857
776	13.155	16.316	18.305	10.768	9.551	14.443	10.955	10.698	7.163	14.045	20.482	22.238	15.9253	11.5873	9.60533	18.9217	2.59713	2.54684	2.11902	4.31362
777	13.598	17.079	18.154	11.285	8.855	13.785	10.514	11.425	7.266	14.86	20.561	22.944	16.277	11.3083	9.735	19.455	2.38153	2.46508	2.1862	4.15394
778	13.152	16.222	17.898	11.523	8.784	14.144	9.941	11.641	7.509	15.254	20.992	22.125	15.7573	11.4837	9.697	19.457	2.40688	2.68022	2.07678	3.68372
779	13.481	16.31	18.212	10.533	8.892	13.837	9.629	10.485	6.776	14.289	20.78	22.04	16.001	11.0873	8.96333	19.0363	2.38059	2.51867	1.94204	4.1593
780	13.94	16.459	17.826	12.164	8.685	13.916	10.413	10.893	7.51	14.851	19.914	21.593	16.075	11.5883	9.60533	18.786	1.97125	2.66259	1.83041	3.50969
781	13.726	16.452	17.303	10.952	9.832	14.626	10.367	11.682	7.325	14.991	20.857	21.83	15.827	11.8033	9.79133	19.226	1.86861	2.50782	2.23482	3.69974
782	13.458	15.746	17.523	10.976	8.956	13.02	10.221	10.489	7.593	14.261	20.638	21.441	15.5757	10.984	9.43433	18.78	2.03785	2.03201	1.60026	3.93411
783	13.33	15.445	17.167	11.559	8.633	13.945	9.69	10.477	7.427	14.929	20.02	22.184	15.314	11.379	9.198	19.0443	1.92185	2.66057	1.58341	3.72461
784	12.974	16.464	18.083	11.179	9.181	16.009	10.142	11.153	7.764	14.947	21.27	22.914	15.8403	12.123	9.68633	19.7103	2.61097	3.51052	1.73984	4.20627
785	13.81	15.664	17.995	10.501	8.897	13.985	10.351	11.128	6.792	14.662	18.872	21.353	15.823	11.1277	9.42367	18.2957	2.09703	2.60124	2.31197	3.38253
786	13.042	16.722	17.61	11.215	9.515	14.21	10.353	10.936	7.003	15.174	20.198	22.355	15.7913	11.6467	9.43067	19.2423	2.42204	2.37708	2.12253	3.68465
787	13.359	16.187	17.045	11.793	9.646	14.268	10.101	10.404	6.566	13.586	20.126	21.793	15.5303	11.9023	9.02367	18.5017	1.92875	2.31294	2.13379	4.33792
788	13.734	16.233	16.89	11.235	8.988	13.734	11.033	11.285	7.094	15.122	20.424	21.989	15.619	11.319	9.804	19.1783	1.66518	2.37411	2.35031	3.59898
789	13.378	17.083	16.568	11.423	8.567	13.635	10.188	10.882	7.435	14.69	20.736	22.434	15.6763	11.2083	9.50167	19.2867	2.007	2.54081	1.82311	4.07036
790	13.591	15.315	17.992	11.248	9.344	14.183	9.833	10.837	6.924	14.801	19.099	22.831	15.6327	11.5917	9.198	18.9103	2.21763	2.43774	2.03232	4.01832
791	13.207	15.854	17.852	11.624	9.004	13.96	10.95	10.716	6.928	14.271	20.187	22.159	15.6377	11.5293	9.53133	18.8723	2.33004	2.47936	2.25759	4.10505
792	12.932	15.942	17.801	11.178	9.346	14.424	10.393	9.764	7.277	14.686	20.55	23.613	15.5583	11.6493	9.14467	19.6163	2.45707	2.5716	1.64774	4.53615
793	12.457	15.919	17.204	10.884	8.497	13.638	10.569	10.359	7.632	14.608	19.906	21.532	15.1933	11.0063	9.52	18.682	2.45529	2.57268	1.63842	3.62065
794	13.983	15.44	16.896	11.811	9.64	14.195	10.673	11.361	6.78	14.751	20.551	22.193	15.4397	11.882	9.60467	19.165	1.4565	2.27833	2.4703	3.90981
795	13.351	16.285	16.743	11.978	9.69	14.913	11.009	10.686	7.51	14.778	20.888	23.526	15.4597	12.1937	9.735	19.7307	1.84046	2.61817	1.93366	4.48736
796	13.29	16.37	16.505	11.075	8.779	14.182	10.913	10.94	6.537	14.506	19.638	22.204	15.3883	11.3453	9.46333	18.7827	1.81846	2.71163	2.53431	3.91963
797	12.69	15.24	16.653	11.471	8.451	13.494	10.086	9.92	6.013	13.494	19.534	21.28	14.861	11.1387	8.673	18.1027	2.0085	2.53787	2.30512	4.08558
798	12.531	15.427	17.321	11.696	8.521	14.926	10.415	10.554	6.934	13.979	20.384	22.027	15.093	11.7143	9.301	18.7967	2.4124	3.20254	2.05106	4.25233
799	13.033	14.693	16.823	10.376	8.688	13.365	8.827	9.408	6.862	13.697	19.563	21.306	14.8497	10.8097	8.36567	18.1887	1.89985	2.36847	1.33422	3.98633
800	12.997	15.647	17.282	11.164	8.937	15.14	9.896	10.375	7.02	14.237	19.876	21.427	15.3087	11.747	9.097	18.5133	2.16244	3.14233	1.81461	3.78374
801	13.037	15.566	17.308	10.621	9.16	13.571	9.666	10.593	7.334	14.92	20.118	21.326	15.3037	11.1173	9.19767	18.788	2.14755	2.247	1.67922	3.4038
802	12.779	14.986	16.447	10.716	8.309	14.069	9.685	10.201	6.476	14.04	18.596	21.719	14.7373	11.0313	8.78733	18.1183	1.8466	2.89292	2.01823	3.86172
803	13.632	15.626	17.414	11.14	9.381	14.248	10.525	11.228	7.124	13.808	20.375	21.988	15.5573	11.5897	9.62567	18.7237	1.89193	2.46446	2.19484	4.33281
804	13.018	16.561	18.03	12.154	9.677	13.94	10.138	10.282	7.085	14.977	20.478	21.861	15.8697	11.9237	9.16833	19.1053	2.57653	2.14081	1.80566	3.6415
805	11.503	15.579	16.22	10.949	8.416	13.57	8.998	9.959	7.135	13.483	19.278	21.52	14.434	10.9783	8.69733	18.0937	2.55847	2.57713	1.43581	4.14733
806	12.137	14.861	16.104	9.414	8.2	13.203	9.325	9.71	6.187	13.262	19.301	20.93	14.3673	10.2723	8.40733	17.831	2.02905	2.60961	1.93248	4.03983
807	12.348	15.583	17.008	11.428	8.43	14.782	10.567	10.003	6.946	14.782	20.214	21.312	14.9797	11.5467	9.172	18.7693	2.38787	3.17766	1.94829	3.4965
808	12.504	15.087	17.493	10.801	8.6	13.707	10.185	9.569	6.545	13.237	19.343	20.429	15.028	11.036	8.76633	17.6697	2.49502	2.5616	1.94823	3.87702
809	12.276	14.889	16.895	10.058	8.721	14.099	9.45	10.848	6.563	13.917	20.085	21.939	14.6867	10.9593	8.95367	18.647	2.31614	2.8	2.18519	4.19988
810	12.415	15.342	17.314	10.998	9.088	14.695	10.598	9.827	7.24	13.617	19.039	21.288	15.0237	11.5937	9.22167	17.9813	2.46496	2.85057	1.75894	3.94336
811	12.257	14.727	16.394	10.744	8.923	14.202	9.633	9.633	7.78	13.831	19.296	20.408	14.4593	11.2897	9.01533	17.845	2.08145	2.68147	1.06983	3.52041
812	12.873	14.624	16.344	11.306	8.786	13.825	10.691	10.876	7.496	13.21	19.662	21.874	14.6137	11.3057	9.68767	18.2487	1.73552	2.5195	1.90029	4.50159
813	12.63	14.967	16.861	10.357	8.652	13.072	10.357	9.978	6.82	13.925	20.587	21.819	14.8193	10.6937	9.05167	18.777	2.11936	2.22915	1.94195	4.24687
814	13.054	15.589	16.667	10.615	8.46	14.037	10.203	9.981	7.193	13.815	20.12	21.103	15.1033	11.0373	9.12567	18.346	1.85482	2.81238	1.67742	3.95462
815	12.583	14.164	16.377	10.939	9.453	13.531	10.243	10.718	7.366	13.089	19.57	22.036	14.3747	11.3077	9.44233	18.2317	1.90575	2.06385	1.81377	4.62121
816	12.11	15.357	16.623	11.364	9.61	15.13	9.643	9.675	7.013	14.058	19.481	21.721	14.6967	12.0347	8.777	18.42	2.32784	2.82045	1.52775	3.94014
817	12.299	14.515	15.157	10.212	7.836	12.685	9.409	9.602	6.68	12.749	18.497	20.906	13.9903	10.2443	8.56367	17.384	1.4995	2.42466	1.63415	4.19085
818	13.287	15.673	16.733	10.172	8.482	14.215	10.603	9.245	7.124	13.453	20.179	21.272	15.231	10.9563	8.99067	18.3013	1.76501	2.94588	1.75339	4.2342
819	12.384	14.696	16.347	11.328	9.875	14.927	9.577	9.841	6.968	14.168	19.98	22.259	14.4757	12.0433	8.79533	18.8023	1.99067	2.60086	1.58801	4.17208
820	12.677	14.29	16.398	9.45	8.199	13.665	9.055	9.45	6.487	13.237	18.571	20.25	14.455	10.438	8.33067	17.3527	1.86598	2.86381	1.60883	3.6618
821	12.337	14.556	16.253	10.836	7.866	13.153	9.726	9.595	6.527	13.414	18.668	19.68	14.382	10.6183	8.616	17.254	1.96379	2.65021	1.81031	3.36381
822	11.826	14.436	14.944	9.624	8.133	13.419	9.522	9.658	5.456	13.182	18.401	21.552	13.7353	10.392	8.212	17.7117	1.67293	2.7254	2.38773	4.22736
823	12.956	14.899	16.877	9.717	9.103	13.467	9.444	8.933	6.58	12.922	18.923	21.241	14.9107	10.7623	8.319	17.6953	1.96053	2.36234	1.52754	4.29323
824	12.008	15.265	15.332	10.719	8.548	13.806	10.041	8.989	7.497	13.263	19.335	20.658	14.2017	11.0243	8.84233	17.752	1.90007	2.64226	1.27833	3.94347
825	12.125	15.329	16.052	10.679	8.543	14.674	10.334	9.749	6.821	14.02	18.808	21.667	14.502	11.2987	8.968	18.165	2.09004	3.11212	1.88222	3.86384
826	11.348	13.745	15.873	10.165	8.072	14.286	10.469	8.95	6.923	12.361	18.845	20.263	13.6553	10.841	8.78067	17.1563	2.26383	3.16167	1.77905	4.21297
827	12.461	14.469	16.649	10.557	8.757	13.015	9.83	9.069	7.061	14.123	19.038	20.907	14.5263	10.7763	8.65333	18.0227	2.09459	2.13746	1.43053	3.50412
828	11.835	15.005	14.442	11.06	9.017	12.927	9.792	9.898	6.516	13.209	18.598	20.5	13.7607	11.0013	8.73533	17.4357	1.69127	1.95566	1.92273	3.78192
829	12.614	14.361	16.177	10.832	8.735	13.312	10.063	10.517	7.163	13.732	18.728	21.244	14.384	10.9597	9.24767	17.9013	1.78161	2.29117	1.81959	3.82362
830	11.478	13.496	15.513	10.4	9.252	13.948	10.4	9.391	6.504	12.661	19.339	20.104	13.4957	11.2	8.765	17.368	2.0175	2.44808	2.02203	4.09429
831	11.378	13.958	14.558	9.435	8.339	12.792	9.117	8.94	5.795	12.049	18.622	19.223	13.298	10.1887	7.95067	16.6313	1.68962	2.3202	1.86896	3.97978
832	11.814	13.572	14.944	9.564	8.368	13.819	10.162	8.509	7.032	12.271	18.565	19.726	13.4433	10.5837	8.56767	16.854	1.56896	2.86499	1.56582	4.01122
833	11.987	14.593	15.949	10.146	8.687	13.273	10.076	8.548	6.915	13.343	18.242	20.5	14.1763	10.702	8.513	17.3617	2.0136	2.34301	1.58079	3.65881
834	11.725	14.772	15.705	10.362	8.605	13.804	9.179	9.251	7.35	13.195	18.86	21.477	14.0673	10.9237	8.59333	17.844	2.08147	2.64462	1.07736	4.23345
835	12.65	15.053	15.583	10.601	9.47	12.721	9.258	9.717	7.385	14.064	18.021	20.707	14.4287	10.9307	8.78667	17.5973	1.563	1.65038	1.23538	3.3417
836	12.157	14.724	16.399	11.373	9.305	13.119	10.481	10.053	7.879	13.512	19.251	21.283	14.4267	11.2657	9.471	18.0153	2.13657	1.90926	1.39522	4.03017
837	12.495	13.864	15.808	9.579	8.931	14.188	9.651	9.579	6.698	13.072	17.861	20.598	14.0557	10.8993	8.64267	17.177	1.6648	2.86644	1.68452	3.80934
838	11.396	13.848	15.398	9.592	7.934	13.163	10.169	8.907	6.491	12.081	18.969	19.942	13.5473	10.2297	8.52233	16.9973	2.01787	2.67219	1.86893	4.28537
839	11.894	13.762	15.235	10.744	9.414	13.008	9.45	9.414	7.186	13.798	19.332	22.206	13.6303	11.0553	8.68333	18.4453	1.67439	1.81711	1.29685	4.27355
840	12.753	14.486	15.444	10.984	9.067	13.785	9.657	10.431	7.114	13.564	19.02	20.715	14.2277	11.2787	9.06733	17.7663	1.36397	2.37276	1.73534	3.7367
841	12.439	14.195	15.54	10.758	8.181	12.775	9.189	10.609	6.799	12.551	18.229	21.068	14.058	10.5713	8.86567	17.2827	1.55503	2.30268	1.92547	4.33664
842	11.951	13.139	14.759	11.159	8.819	14.327	9.647	9.683	6.839	12.491	18.467	21.454	13.283	11.435	8.723	17.4707	1.40953	2.76435	1.63169	4.56381
843	12.644	13.47	14.44	10.524	9.016	13.47	9.986	9.591	6.358	12.392	18.534	19.72	13.518	11.0033	8.645	16.882	0.898962	2.26536	1.99042	3.93341
844	11.793	13.18	15.078	9.712	8.762	12.815	9.419	9.091	6.061	12.304	17.415	20.007	13.3503	10.4297	8.19033	16.5753	1.64911	2.11967	1.85134	3.91954
845	11.54	13.069	15.69	10.084	8.846	13.142	9.465	8.482	5.388	12.887	17.328	21.405	13.433	10.6907	7.77833	17.2067	2.09881	2.21132	2.12764	4.2603
846	11.686	14.09	14.016	10.059	8.469	12.537	10.059	9.061	6.25	12.574	17.641	19.896	13.264	10.355	8.45667	16.7037	1.36709	2.05009	1.9751	3.74992
847	12.405	14.317	15.723	9.665	9.737	13.127	9.268	9.809	7.248	13.271	17.67	19.546	14.1483	10.843	8.775	16.829	1.66542	1.97833	1.3498	3.22093
848	11.841	14.209	14.855	9.437	8.934	13.671	9.975	8.934	6.602	12.953	17.797	20.703	13.635	10.6807	8.50367	17.151	1.58687	2.60189	1.72719	3.91518
849	10.769	12.437	14.83	10.044	9.21	13.996	9.028	9.173	5.729	12.727	17.005	20.015	12.6787	11.0833	7.97667	16.5823	2.04126	2.55668	1.94789	3.66234
850	11.955	14.485	15.512	11.514	9.351	13.238	10.451	9.791	6.967	13.898	18.409	21.195	13.984	11.3677	9.06967	17.834	1.83066	1.94763	1.85062	3.68233
851	11.93	14.009	15.067	10.033	9.632	13.791	9.814	8.574	7.114	12.514	19.044	21.124	13.6687	11.152	8.50067	17.5607	1.59595	2.29422	1.35149	4.49258
852	11.778	14.358	14.286	10.36	8.433	12.686	8.979	8.688	5.889	12.395	17.921	21.592	13.474	10.493	7.852	17.3027	1.46922	2.12962	1.70622	4.62957
853	12.192	13.897	15.784	10.269	9.18	13.716	10.232	9.652	6.713	13.28	19.194	21.916	13.9577	11.055	8.86567	18.13	1.79677	2.36795	1.88669	4.41522
854	12.478	13.864	14.255	10.38	8.638	14.077	10.487	9.349	6.399	12.727	19.303	20.334	13.5323	11.0317	8.745	17.4547	0.933774	2.77744	2.10987	4.1266
855	11.872	12.856	14.717	10.221	9.027	12.821	9.484	8.395	5.725	12.083	18.159	20.126	13.1483	10.6897	7.868	16.7893	1.44485	1.93993	1.93412	4.19279
856	12.39	14.472	14.402	9.566	9.283	13.237	10.378	8.719	7.166	13.343	18.743	22.344	13.7547	10.6953	8.75433	18.1433	1.18235	2.20569	1.60629	4.53036
857	11.425	13.223	15.056	10.472	9.697	12.271	8.992	8.956	6.876	13.223	19.64	20.346	13.2347	10.8133	8.27467	17.7363	1.81553	1.32051	1.21141	3.92457
858	11.976	14.106	15.293	11.418	9.218	13.966	10.161	9.881	7.158	13.024	17.458	20.95	13.7917	11.534	9.06667	17.144	1.68069	2.37612	1.65887	3.97232
859	11.087	13.682	15.601	10.057	9.346	12.331	10.306	9.986	6.716	13.326	18.941	20.185	13.4567	10.578	9.00267	17.484	2.26542	1.55921	1.98676	3.65426
860	12.416	13.941	15.218	10.607	9.01	13.019	10.145	9.649	7.059	12.629	19.546	20.681	13.8583	10.8787	8.951	17.6187	1.40283	2.01826	1.65718	4.35828
861	11.28	13.418	14.557	9.762	9.245	13.177	9.038	8.796	6.002	10.831	17.558	19.8	13.085	10.728	7.94533	16.063	1.66369	2.13659	1.68732	4.66766
862	12.202	14.306	15.428	10.799	10.028	13.464	11.045	9.046	6.557	13.184	18.303	22.055	13.9787	11.4303	8.88267	17.8473	1.63772	1.8029	2.24845	4.45302
863	11.008	13.443	13.752	9.979	8.882	12.894	9.636	8.608	6.379	13.134	17.97	20.508	12.7343	10.585	8.20767	17.204	1.50301	2.07351	1.665	3.7462
864	12.022	13.621	16.435	10.181	9.659	13.621	9.868	9.138	6.776	12.404	17.755	21.438	14.026	11.1537	8.594	17.199	2.2342	2.15265	1.61619	4.54259
865	12.462	13.657	14.988	10.516	8.911	13.896	10.789	9.423	6.555	12.871	18.197	20.86	13.7023	11.1077	8.92233	17.3093	1.26361	2.54462	2.16095	4.0678
866	11.617	14.664	14.094	9.977	8.972	13.224	10.546	8.805	6.461	12.655	17.744	20.221	13.4583	10.7243	8.604	16.8733	1.61991	2.22233	2.0499	3.85741
867	10.991	12.812	15.071	9.912	7.957	13.419	9.71	8.328	5.732	11.733	17.465	20.027	12.958	10.4293	7.92333	16.4083	2.04391	2.76751	2.01964	4.24677
868	11.763	14.201	14.629	10.972	9.522	14.432	10.708	9.16	6.557	13.245	17.364	20.395	13.531	11.642	8.80833	17.0013	1.54602	2.52264	2.09773	3.58877
869	11.458	13.978	15.155	10.383	9.375	12.97	10.047	9.274	6.687	12.231	18.481	20.43	13.5303	10.9093	8.66933	17.0473	1.88872	1.85439	1.75972	4.28339
870	11.828	13.131	14.3	10.09	9.322	13.097	9.255	9.656	6.716	13.03	18.343	20.114	13.0863	10.8363	8.54233	17.1623	1.23661	1.9951	1.59431	3.68663
871	11.51	12.718	14.933	10.772	8.993	13.826	9.866	8.658	6.711	12.416	19.06	20.403	13.0537	11.197	8.41167	17.293	1.73601	2.44437	1.59186	4.27665
872	11.674	13.113	14.781	10.824	8.6	13.538	10.268	9.745	6.573	13.113	17.56	19.948	13.1893	10.9873	8.862	16.8737	1.55491	2.47305	1.99951	3.4688
873	11.236	12.488	13.575	9.72	8.995	12.652	9.423	8.007	5.206	11.631	18.155	18.748	12.433	10.4557	7.54533	16.178	1.17047	1.93632	2.14607	3.94896
874	10.875	12.637	14.799	10.742	8.513	12.77	9.777	9.611	6.385	11.373	17.459	20.685	12.7703	10.675	8.591	16.5057	1.96539	2.12929	1.91225	4.72863
875	11.298	13.435	15.766	9.518	9.485	13.435	11.072	8.773	6.636	13.435	17.546	20.201	13.4997	10.8127	8.827	17.0607	2.2347	2.27107	2.21849	3.40901
876	11.809	12.627	13.935	9.388	9.192	13.903	10.075	8.538	7.295	12.332	17.599	19.66	12.7903	10.8277	8.636	16.5303	1.07237	2.66512	1.39259	3.77908
877	12.714	12.973	14.526	9.673	8.638	13.944	10.45	8.994	6.6	12.197	18.57	20.641	13.4043	10.7517	8.68133	17.136	0.979986	2.81266	1.94395	4.40086
878	11.355	13.327	15.553	9.256	8.651	13.327	9.765	8.779	5.852	12.786	18.352	20.261	13.4117	10.4113	8.132	17.133	2.10028	2.5431	2.03515	3.88373
879	10.733	12.106	13.573	9.61	8.268	12.761	9.423	8.112	5.959	10.733	17.005	19.75	12.1373	10.213	7.83133	15.8293	1.42026	2.3064	1.74897	4.62204
880	11.587	13.683	14.607	9.646	9.276	12.881	9.368	8.105	6.163	12.08	18.336	19.877	13.2923	10.601	7.87867	16.7643	1.54744	1.98319	1.61444	4.12927
881	10.835	12.742	13.711	10.048	8.989	13.317	9.352	8.081	6.205	11.713	17.887	19.522	12.4293	10.7847	7.87933	16.374	1.46327	2.25608	1.58316	4.11849
882	11.911	13.511	15.17	9.659	9.274	13.244	10.163	9.511	6.163	13.156	17.719	20.711	13.5307	10.7257	8.61233	17.1953	1.62959	2.18942	2.14609	3.80463
883	12.023	13.048	15.157	9.658	8.974	14.416	11.311	8.148	6.439	12.422	18.917	20.798	13.4093	11.016	8.63267	17.379	1.59794	2.96428	2.4719	4.3947
884	11.844	13.464	14.749	10.279	9.441	13.743	10.223	8.603	6.816	11.48	17.765	20.335	13.3523	11.1543	8.54733	16.5267	1.45572	2.28067	1.70418	4.55553
885	10.74	12.356	13.863	9.233	7.945	12.849	8.767	7.671	5.151	11.644	17.699	18.63	12.3197	10.009	7.19633	15.991	1.56182	2.54243	1.85414	3.79328
886	11.099	13.834	14.18	11.312	9.745	13.117	9.825	8.842	6.93	13.17	18.03	20.818	13.0377	11.3913	8.53233	17.3393	1.68782	1.6874	1.47213	3.8705
887	11.772	13.651	14.471	10.291	9.365	13.413	10.397	8.386	6.481	12.593	17.778	20.476	13.298	11.023	8.42133	16.949	1.38369	2.12095	1.95824	4.00635
888	11.154	12.711	13.411	9.909	8.664	12.892	9.546	8.949	6.304	12.503	17.095	20	12.4253	10.4883	8.26633	16.5327	1.1553	2.17272	1.72545	3.78
889	11.233	12.781	14.104	8.887	8.337	12.581	9.71	8.737	6.34	12.506	17.199	19.546	12.706	9.935	8.26233	16.417	1.43697	2.30795	1.73442	3.58456
890	11.765	13.532	13.968	10.167	9.15	13.241	10.458	8.69	6.149	11.668	17.768	20.673	13.0883	10.8527	8.43233	16.703	1.16659	2.12995	2.16603	4.596
891	12.059	12.779	14.649	9.854	9.278	13.546	9.638	9.158	6.281	11.244	18.101	19.636	13.1623	10.8927	8.359	16.327	1.33687	2.31583	1.81553	4.46841
892	11.724	13.422	14.887	10.793	9.211	14.352	10.281	9.025	6.653	13.236	18.539	20.609	13.3443	11.452	8.653	17.4613	1.58293	2.63309	1.84239	3.8028
893	11.223	13.017	14.001	11.07	9.67	13.236	9.823	8.641	6.476	12.054	17.72	20.739	12.747	11.3253	8.31333	16.8377	1.40854	1.79666	1.69739	4.40922
894	11.322	12.721	14.27	9.277	8.459	12.742	9.212	8.674	5.984	11.946	16.767	19.307	12.771	10.1593	7.95667	16.0067	1.47464	2.27374	1.72943	3.73894
895	12.06	13.353	14.54	10.64	8.605	13.396	9.623	8.775	6.655	12.844	18.482	19.903	13.3177	10.8803	8.351	17.0763	1.24038	2.40452	1.52875	3.73354
896	11.393	12.751	13.987	10.116	9.143	13.683	9.528	8.453	6.588	12.285	18.082	20.86	12.7103	10.9807	8.18967	17.0757	1.29748	2.39032	1.48758	4.37518
897	12.086	12.378	14.288	9.766	9.181	13.801	9.513	8.967	6.452	12.359	17.368	20.351	12.9173	10.916	8.31067	16.6927	1.19598	2.51555	1.63264	4.03857
898	11.863	12.591	14.431	10.023	9.467	13.032	10.349	8.816	6.535	12.61	18.34	20.372	12.9617	10.8407	8.56667	17.1073	1.32352	1.918	1.91919	4.02514
899	11.694	13.16	14.278	10.63	9.897	13.875	10.301	8.743	6.891	12.408	18.438	20.693	13.044	11.4673	8.645	17.1797	1.2959	2.11707	1.70711	4.28344
900	11.401	12.952	13.974	9.568	8.881	12.423	9.322	8.775	6.326	12.018	17.656	19.789	12.7757	10.2907	8.141	16.4877	1.29553	1.87833	1.59545	4.01508
901	11.665	12.793	14.199	10.172	9.13	13.852	10.207	9.2	6.596	12.463	17.931	20.326	12.8857	11.0513	8.66767	16.9067	1.26954	2.48077	1.86343	4.03034
902	11.336	13.239	13.946	10.359	9.281	13.273	10.291	8.59	6.384	12.447	17.871	20.33	12.8403	10.971	8.42167	16.8827	1.3499	2.06517	1.95893	4.03336
903	11.585	12.506	14.057	10.002	9.145	13.637	10.341	8.709	6.544	12.942	17.677	19.777	12.716	10.928	8.53133	16.7987	1.24931	2.38487	1.90472	3.50113
904	12.316	12.601	14.213	10.087	8.806	13.075	10.055	8.269	6.482	12.427	17.249	20.221	13.0433	10.656	8.26867	16.6323	1.02294	2.19064	1.7865	3.93342
905	11.504	13.29	13.473	10.33	9.536	13.457	9.826	9.033	6.439	12.084	17.333	20.598	12.7557	11.1077	8.43267	16.6717	1.08783	2.07295	1.77151	4.29535
906	11.746	13.142	13.825	10.425	9.222	12.816	10.113	8.836	6.683	12.103	17.181	20.374	12.9043	10.821	8.544	16.5527	1.05968	1.82943	1.73354	4.17115
907	11.577	12.607	14.566	10.358	8.98	13.477	10.039	8.182	6.964	12.244	17.757	20.485	12.9167	10.9383	8.395	16.8287	1.51837	2.30398	1.54853	4.1982
908	11.495	12.856	13.877	10.021	8.746	13.14	10.149	8.377	6.917	12.445	18.101	20.383	12.7427	10.6357	8.481	16.9763	1.19504	2.26057	1.61851	4.08676
909	11.708	12.864	13.95	10.052	8.993	13.588	9.564	8.896	6.85	12.084	16.929	19.964	12.8407	10.8777	8.43667	16.3257	1.12118	2.4062	1.4141	3.97449
910	11.645	12.849	14.053	10.249	9.1	13.424	10.4	8.388	6.554	12.781	17.419	20.211	12.849	10.9243	8.44733	16.8037	1.204	2.23971	1.92369	3.75303
911	11.487	12.936	13.875	9.97	9.071	13.151	10.319	8.682	7.018	12.131	17.445	20.142	12.766	10.7307	8.673	16.5727	1.20304	2.14373	1.65052	4.07612
912	11.72	12.517	13.578	10.008	9.437	13.472	9.968	9.012	6.769	12.344	17.786	20.122	12.605	10.9723	8.583	16.7507	0.932121	2.18352	1.64208	3.99102
913	11.686	12.821	13.839	10.213	8.921	13.16	10.526	8.765	6.821	12.378	17.504	20.164	12.782	10.7647	8.704	16.682	1.07703	2.17268	1.85325	3.95755
914	11.068	12.113	13.681	9.578	8.951	12.936	9.918	8.493	6.756	11.995	17.705	19.94	12.2873	10.4883	8.389	16.5467	1.31519	2.1428	1.58356	4.0972
915	11.966	12.908	13.98	10.494	8.816	13.128	10.391	9.475	6.932	12.134	17.323	20.279	12.9513	10.8127	8.93267	16.5787	1.0077	2.17359	1.79214	4.1232
916	11.664	12.792	14.278	10.472	9.382	13.15	10.408	9.318	6.998	11.753	17.765	20.085	12.9113	11.0013	8.908	16.5343	1.31108	1.93897	1.74158	4.30017
917	11.372	13.263	13.697	10.269	9.481	13.434	10.309	8.68	6.921	12.213	17.505	20.053	12.7773	11.0613	8.63667	16.5903	1.23625	2.09222	1.69442	3.99923
918	11.535	12.744	13.601	10.003	8.976	13.822	10.34	8.626	6.924	12.055	17.693	20.005	12.6267	10.9337	8.63	16.5843	1.03799	2.55353	1.708	4.08931
919	11.968	12.047	13.957	9.651	9.072	13.18	10.165	9.217	7.07	12.205	17.419	20.606	12.6573	10.6343	8.81733	16.7433	1.12624	2.22354	1.58574	4.24106
920	11.485	12.123	12.934	9.478	9.012	13.532	9.969	8.255	6.646	11.299	17.294	19.726	12.1807	10.674	8.29	16.1063	0.726219	2.48604	1.66178	4.33722
921	11.729	12.469	13.99	9.975	9.002	13.182	10.674	8.934	7.153	12.469	17.128	20.211	12.7293	10.7197	8.92033	16.6027	1.15276	2.18723	1.76054	3.89764
922	12.136	12.453	13.779	9.954	9.14	13.158	10.162	8.505	6.42	12.578	17.493	20.047	12.7893	10.7507	8.36233	16.706	0.871609	2.12417	1.87508	3.79618
923	11.28	12.617	13.215	10.249	9.205	13.884	10.528	8.481	7.116	11.503	17.658	20.164	12.3707	11.1127	8.70833	16.4417	0.99074	2.45616	1.71732	4.45677
924	11.092	13.102	13.73	10.066	8.954	13.117	10.037	8.269	6.972	12.119	17.85	19.689	12.6413	10.7123	8.426	16.5527	1.37801	2.15545	1.53852	3.94823
925	11.311	12.332	13.004	9.384	8.771	12.391	10.42	7.837	6.699	12.23	17.119	19.775	12.2157	10.182	8.31867	16.3747	0.852474	1.93745	1.90669	3.82718
926	11.979	12.764	13.822	9.849	9.335	13.625	10.755	8.489	7.009	11.994	17.402	20.483	12.855	10.9363	8.751	16.6263	0.924864	2.34259	1.88669	4.29733
927	11.648	12.437	13.804	9.947	9.233	13.242	11.116	8.641	6.925	11.83	17.388	19.696	12.6297	10.8073	8.894	16.3047	1.09084	2.13849	2.10692	4.04335
928	11.431	11.89	13.727	9.706	9.088	13.284	10.275	8.328	6.951	12.381	16.672	19.49	12.3493	10.6927	8.518	16.181	1.21497	2.26533	1.67013	3.57984
929	10.938	12.218	13.077	10.112	9.107	13.466	10.144	7.908	6.433	11.927	17.145	19.203	12.0777	10.895	8.16167	16.0917	1.07638	2.28255	1.86846	3.75062
930	11.298	12.417	13.588	9.737	9.313	12.841	10.5	9.042	7.345	12.383	17.863	20.237	12.4343	10.6303	8.96233	16.8277	1.1451	1.9262	1.57901	4.02806
931	11.571	12.205	13.332	9.546	8.824	12.716	10.162	8.912	6.992	12.364	17.806	19.901	12.3693	10.362	8.68867	16.6903	0.891927	2.07034	1.59676	3.89039
932	11.183	12.047	13.96	9.932	8.902	13.518	10.116	8.92	6.971	11.863	17.252	19.643	12.3967	10.784	8.669	16.2527	1.42114	2.42307	1.58745	3.98511
933	11.504	12.422	12.969	9.824	8.789	13.281	10.176	8.613	6.777	11.992	17.012	19.316	12.2983	10.6313	8.522	16.1067	0.740288	2.35231	1.70133	3.74499
934	11.327	11.587	13.013	9.706	8.56	12.17	10.225	7.674	6.788	11.803	17.077	19.996	11.9757	10.1453	8.229	16.292	0.907714	1.84466	1.78445	4.15253
935	10.543	11.977	12.814	10.16	9.132	12.599	10.041	8.295	6.718	10.949	17.499	19.197	11.778	10.6303	8.35133	15.8817	1.1485	1.78071	1.66222	4.35536
936	10.249	11.438	12.882	10.051	8.579	13.25	9.315	8.267	5.946	10.391	16.648	18.743	11.523	10.6267	7.84267	15.2607	1.31856	2.38812	1.72412	4.3454
937	10.913	11.887	12.861	9.159	8.282	11.725	9.776	8.282	6.658	11.335	16.661	18.74	11.887	9.722	8.23867	15.5787	0.974	1.78921	1.55945	3.8193
938	10.62	11.697	12.217	8.875	7.798	11.92	9.58	7.798	6.795	11.511	16.079	19.124	11.5113	9.531	8.05767	15.5713	0.814528	2.13787	1.41054	3.83181
939	9.851	11.432	11.026	9.761	8.179	11.704	8.947	7.094	5.648	10.845	15.861	20.108	10.7697	9.88133	7.22967	15.6047	0.821079	1.76558	1.65368	4.63682
940	10.491	10.443	11.405	9.384	6.882	13.041	10.154	7.796	5.534	11.116	15.833	18.191	10.7797	9.769	7.828	15.0467	0.542086	3.0975	2.31017	3.60245
941	10.283	10.598	11.91	9.811	7.817	12.12	9.549	7.24	5.089	11.07	15.95	18.153	10.9303	9.916	7.29267	15.0577	0.862912	2.15342	2.23047	3.62483
942	11.47	10.301	12.138	9.967	8.463	11.359	7.795	6.626	5.679	10.301	16.036	18.04	11.303	9.92967	6.7	14.7923	0.929817	1.44836	1.05994	4.0166
943	9.629	10.625	11.898	9.076	8.633	10.625	9.463	7.692	6.586	11.455	14.942	17.875	10.7173	9.44467	7.91367	14.7573	1.13731	1.04592	1.45125	3.21398
944	11.536	10.667	12.058	8.754	6.725	12.986	8.812	7.478	5.913	11.478	16.58	19.362	11.4203	9.48833	7.401	15.8067	0.702677	3.19444	1.45103	3.99849
945	9.519	10.394	12.199	8.753	8.589	12.309	9.737	7.549	6.182	9.737	15.974	17.724	10.704	9.88367	7.82267	14.4783	1.36663	2.102	1.79323	4.19831
946	12.46	10.642	11.604	10.695	8.128	12.032	8.77	8.984	7.38	12.139	16.631	17.647	11.5687	10.285	8.378	15.4723	0.909515	1.98403	0.870891	2.93111
947	9.822	11.442	11.599	8.255	8.307	12.591	9.039	7.419	5.12	10.24	17.085	18.548	10.9543	9.71767	7.19267	15.291	0.983766	2.48852	1.96928	4.43504
948	10.14	10.29	11.838	9.091	8.042	12.338	8.941	5.594	5.544	10.49	14.386	17.582	10.756	9.82367	6.693	14.1527	0.940036	2.23976	1.94699	3.55175
949	11.762	11.153	12.371	8.341	8.341	12.652	9.888	8.247	7.357	12.418	17.807	19.4	11.762	9.778	8.49733	16.5417	0.609	2.48896	1.28394	3.65895
950	11.993	11.644	12.691	8.548	8.024	11.252	10.161	8.809	6.978	11.208	16.877	17.968	12.1093	9.27467	8.64933	15.351	0.533106	1.73235	1.5975	3.62917
951	9.942	11.065	10.732	8.403	8.195	12.479	9.068	6.864	5.366	10.94	15.516	18.386	10.5797	9.69233	7.09933	14.9473	0.57679	2.41556	1.86219	3.75543
952	11.175	11.051	12.459	8.402	7.409	12.003	8.982	7.368	6.167	10.969	16.97	18.543	11.5617	9.27133	7.50567	15.494	0.779583	2.41723	1.41254	3.99691
953	10.781	10.935	12.481	8.423	8.423	12.403	10.201	8.192	7.032	11.476	16.847	19.706	11.399	9.74967	8.475	16.0097	0.940198	2.29785	1.60334	4.17841
954	10.594	10.594	11.843	9.648	8.816	11.843	9.383	7.34	5.297	10.972	16.194	18.199	11.0103	10.1023	7.34	15.1217	0.72111	1.56381	2.043	3.73093
955	10.58	11.383	11.602	9.376	8.428	12.295	9.121	8.719	7.333	11.529	16.344	18.533	11.1883	10.033	8.391	15.4687	0.538091	2.01548	0.938043	3.58311
956	11.182	10.651	11.642	9.236	7.997	10.651	9.66	7.289	6.334	10.828	15.888	19.781	11.1583	9.29467	7.761	15.499	0.495924	1.32797	1.7125	4.48916
957	9.699	10.758	12.5	9.221	7.275	12.671	9.187	7.855	5.806	11.407	15.915	18.852	10.9857	9.72233	7.616	15.3913	1.41431	2.73271	1.70312	3.75002
958	10.93	11.034	13.421	8.855	8.371	13.179	9.893	7.126	6.607	11.899	16.465	19.613	11.795	10.135	7.87533	15.9923	1.40912	2.64727	1.76651	3.87866
959	10.668	11.878	11.944	8.508	8.966	11.387	10.111	8.933	7.199	10.831	16.59	19.306	11.4967	9.62033	8.74767	15.5757	0.718405	1.54702	1.46482	4.32759
960	10.771	10.9	11.803	9.094	7.707	12.48	9.094	7.481	5.418	10.674	16.188	18.736	11.158	9.76033	7.331	15.1993	0.562298	2.45528	1.84258	4.12093
961	10.659	10.243	12.708	10.019	8.355	12.196	9.699	7.298	6.626	11.172	16.549	18.342	11.2033	10.19	7.87433	15.3543	1.31958	1.9262	1.61553	3.73131
962	10.627	10.658	13.103	8.37	8.213	11.473	9.185	7.9	6.144	10.94	16.019	18.401	11.4627	9.352	7.743	15.12	1.42065	1.83852	1.52657	3.81088
963	9.673	10.688	12.02	9.007	8.278	12.401	9.832	7.136	5.709	11.164	16.429	19.569	10.7937	9.89533	7.559	15.7207	1.17706	2.20037	2.0938	4.24704
964	10.577	11.228	12.128	10.267	8.499	13.12	9.77	7.94	5.924	11.942	16.346	19.82	11.311	10.6287	7.878	16.036	0.778824	2.33163	1.92375	3.94814
965	10.842	11.339	12.022	9.04	8.232	13.203	10.314	8.046	6.617	10.531	17.117	18.857	11.401	10.1583	8.32567	15.5017	0.592438	2.66753	1.8643	4.39176
966	10.484	10.671	11.856	8.175	8.3	12.293	10.047	7.332	5.803	10.328	16.786	18.159	11.0037	9.58933	7.72733	15.091	0.744041	2.34228	2.14944	4.18162
967	10.116	10.727	11.858	8.649	8.099	12.133	9.046	7.366	5.41	10.605	15.709	18.612	10.9003	9.627	7.274	14.9753	0.883841	2.18761	1.81975	4.0536
968	10.866	11.673	12.263	10.214	8.631	11.58	10.152	8.289	7.11	10.494	16.889	19.093	11.6007	10.1417	8.517	15.492	0.701303	1.47583	1.53376	4.46648
969	11.091	11.832	12.079	10.442	8.496	13.16	9.268	8.032	6.117	11.152	16.25	18.814	11.6673	10.6993	7.80567	15.4053	0.514172	2.34262	1.58765	3.90021
970	9.313	10.798	10.922	8.323	7.828	11.603	8.818	6.745	5.136	10.21	14.635	18.967	10.3443	9.25133	6.89967	14.604	0.89531	2.05159	1.84587	4.37858
971	10.663	11.457	12.694	9.426	9.172	13.012	10.029	8.093	7.521	10.981	15.963	18.978	11.6047	10.5367	8.54767	15.3073	1.02352	2.14746	1.31437	4.03862
972	9.609	10.881	12.186	8.75	8.081	13.331	9.768	6.713	5.377	10.627	16.227	17.467	10.892	10.054	7.286	14.7737	1.28854	2.85761	2.25088	3.64425
973	11.035	9.44	12.066	8.878	8.034	11.222	9.565	7.346	6.033	11.254	15.098	18.318	10.847	9.378	7.648	14.89	1.32306	1.65177	1.78526	3.53659
974	10.389	10.454	12.158	9.07	7.977	12.512	9.617	7.012	6.948	11.837	16.597	18.495	11.0003	9.853	7.859	15.643	1.0031	2.36672	1.52281	3.42999
975	10.345	11.408	12.053	8.959	8.443	11.892	9.894	7.734	5.93	10.828	15.791	18.885	11.2687	9.76467	7.85267	15.168	0.862483	1.8603	1.98466	4.06447
976	10.327	9.898	10.789	8.809	7.291	12.042	10.327	7.093	6.302	10.228	14.649	18.443	10.338	9.38067	7.90733	14.44	0.445602	2.42654	2.13249	4.11149
977	10.699	11.133	12.437	8.526	7.857	11.601	10.064	7.957	6.085	10.966	16.55	19.492	11.423	9.328	8.03533	15.6693	0.904564	1.99669	1.99066	4.33069
978	9.601	10.69	11.085	8.875	7.687	12.372	9.469	7.522	7.093	10.261	16.694	19.169	10.4587	9.64467	8.028	15.3747	0.76857	2.43549	1.26624	4.59822
979	10.357	10.117	11.42	8.471	8.711	12.277	10.254	7.099	5.521	11.077	16.358	19.822	10.6313	9.81967	7.62467	15.7523	0.693467	2.13149	2.40989	4.40385
980	10.262	10.533	12.47	8.835	8.393	12.063	9.548	7.679	6.796	11.315	16.208	18.552	11.0883	9.76367	8.00767	15.3583	1.20421	2.00351	1.40513	3.69256
981	9.895	11.509	12.07	9.263	8.947	12	9.614	8.316	6.211	10.632	15.93	20.07	11.158	10.07	8.047	15.544	1.12918	1.67888	1.71737	4.73083
982	9.851	10.276	11.269	9.284	8.505	12.438	9.001	7.76	6.449	11.304	15.84	18.71	10.4653	10.0757	7.73667	15.2847	0.727713	2.08259	1.27616	3.7341
983	9.771	9.989	11.914	8.427	8.645	11.115	9.517	7.919	6.139	10.207	16.164	17.69	10.558	9.39567	7.85833	14.687	1.17938	1.49297	1.68982	3.95411
984	9.052	10.057	10.524	8.908	8.585	11.818	9.447	7.579	6.466	10.92	15.697	19.145	9.87767	9.77033	7.83067	15.254	0.752208	1.78067	1.50635	4.13036
985	10.813	9.599	11.144	8.716	7.098	11.769	8.165	7.282	6.179	9.93	15.006	17.874	10.5187	9.19433	7.20867	14.27	0.813468	2.37195	0.995029	4.02282
986	10.968	10.285	12.562	9.753	8.691	12.562	9.943	7.4	5.579	10.474	16.622	17.761	11.2717	10.3353	7.64067	14.9523	1.16848	2.00012	2.19193	3.91994
987	9.213	11.593	11.977	7.332	8.791	11.785	8.676	7.255	6.18	11.401	15.086	18.273	10.9277	9.30267	7.37033	14.92	1.49731	2.27017	1.25199	3.43901
988	9.973	10.206	11.336	9.116	8.921	11.102	9.31	7.713	5.96	10.245	15.816	18.816	10.505	9.713	7.661	14.959	0.729036	1.20685	1.67561	4.34929
989	9.721	9.163	11.554	7.49	8.088	11.394	9.641	7.092	5.418	10.08	15.378	18.526	10.146	8.99067	7.38367	14.6613	1.25088	2.10271	2.12655	4.26836
990	8.891	10.481	11.011	8.197	9.013	11.501	9.584	8.238	5.873	10.767	16.639	18.719	10.1277	9.57033	7.89833	15.375	1.10328	1.72107	1.87867	4.12394
991	9.942	9.612	10.561	8.333	8.54	12.624	8.663	6.931	5.446	10.437	15.594	19.224	10.0383	9.83233	7.01333	15.085	0.481778	2.41987	1.61008	4.41556
992	10.963	10.379	12.422	7.795	8.879	11.838	9.962	7.712	6.961	11.463	15.632	18.966	11.2547	9.504	8.21167	15.3537	1.05227	2.09271	1.56165	3.75924
993	9.945	12.188	12.569	9.649	8.718	13.161	10.664	8.083	6.39	11.172	15.658	19.34	11.5673	10.5093	8.379	15.39	1.41784	2.34312	2.15232	4.09059
994	10.009	8.896	10.479	9.153	7.998	12.275	9.025	6.929	5.389	10.351	15.526	17.793	9.79467	9.80867	7.11433	14.5567	0.812974	2.2126	1.82507	3.81452
995	10.07	10.375	11.683	9.198	7.803	12.075	9.154	8.413	7.585	10.724	15.65	19.093	10.7093	9.692	8.384	15.1557	0.856899	2.17842	0.784902	4.20634
996	9.562	10.536	10.624	8.853	8.986	12.838	10.27	8.721	7.216	10.934	16.822	18.681	10.2407	10.2257	8.73567	15.479	0.589387	2.26332	1.52705	4.04435
997	10.306	10.67	12.038	9.302	9.53	12.175	10.123	8.618	5.928	10.351	15.595	18.285	11.0047	10.3357	8.223	14.7437	0.913213	1.59698	2.12521	4.03493
998	10.446	9.424	11.421	8.589	8.124	11.746	9.749	6.639	5.107	9.192	15.46	18.431	10.4303	9.48633	7.165	14.361	0.998592	1.97069	2.36528	4.71653
999	10.358	10.125	12.634	9.057	8.314	12.68	11.705	7.71	5.806	11.287	16.024	18.672	11.039	10.017	8.407	15.3277	1.38621	2.33596	3.01063	3.74142
1000	8.847	8.661	11.116	9.264	8.337	11.116	10.097	6.762	5.697	9.403	14.775	18.064	9.54133	9.57233	7.51867	14.0807	1.36687	1.41492	2.29552	4.37205
