# Supplementary material for: Molecular basis of wax-based color change and UV reflection in dragonflies
Source: eLife. 2019 Jan 15;8:e43045. doi: 10.7554/eLife.43045 (PMC6353593; doi:10.7554/eLife.43045)
Supplement: Figure 7—source data 4. [file elife-43045-fig7-data4.xlsx]

## Sheet: Sdarwinianum-CRAIC
	Male	Male	Male	Male	Male	Male	Male	Male	Male	Male	Male	Male	Male	Male	Male	Male	Male	Male	Male	Male	Male	Male	Male	Male	Male	Male	Male	Male	Male	Male	Female	Female	Female	Female	Female	Female	Female	Female	Female	Female	Female	Female	Female	Female	Female	Female	Female	Female	Female
wavelength	M5D1-1	M5D1-2	M5D1-3	M5D1-4	M5D1-5	M5D2-1	M5D2-2	M5D2-3	M5D2-4	M5D2-5	M5D3-1	M5D3-2	M5D3-3	M5D3-4	M5D3-5	M5V1-1	M5V1-2	M5V1-3	M5V1-4	M5V1-5	M5V2-1	M5V2-2	M5V2-3	M5V2-4	M5V2-5	M5V3-1	M5V3-2	M5V3-3	M5V3-4	M5V3-5	F5D1-1	F5D1-2	F5D1-3	F5D1-4	F5D1-5	F5D2-1	F5D2-2	F5D2-3	F5D2-4	F5D2-5	F5D3-1	F5D3-2	F5D3-3	F5D3-4	F5D3-5	F5V1-1	F5V1-2	F5V1-3	F5V1-4
380	15.8346	15.6939	15.388	15.9109	15.5276	20.3522	16.9873	17.0122	17.2603	17.1392	18.539	17.6961	17.2976	17.7412	17.3478	18.8868	20.2875	18.358	19.8133	19.0803	21.5987	22.1113	20.772	20.9673	19.8698	19.7774	21.9954	20.7646	22.1825	21.3917	19.2368	19.6519	25.4148	19.2201	19.0606	18.2064	18.3673	18.3833	18.4327	19.2222	18.0918	18.4458	18.5639	18.2433	18.3042	24.794	23.171	26.3768	22.7525
381	15.7578	15.5103	15.4493	15.7146	15.3385	20.1641	16.6768	16.7283	16.9981	17.0087	18.154	17.3294	17.0699	17.3876	17.0501	18.7568	19.9531	18.3037	19.6124	18.9157	21.4092	21.9249	20.4493	20.6789	19.5672	19.4889	21.7236	20.4479	21.7788	21.022	19.0558	19.2627	25.2008	18.8268	18.7645	17.8274	18.0876	18.0605	18.2699	19.0535	17.8708	18.0398	18.1443	18.1002	18.0742	24.3815	22.865	26.2676	22.4171
382	15.6665	15.222	15.2828	15.7659	15.1807	19.9321	16.4029	16.4926	16.6516	16.7541	17.7491	16.9841	16.7776	16.891	16.8305	18.5419	19.7665	18.1119	19.3415	18.8064	21.0376	21.3221	20.2611	20.4709	19.2464	19.277	21.5109	20.3669	21.5449	20.6356	18.6298	18.7864	25.0117	18.4784	18.5274	17.4503	17.631	17.6095	17.8226	18.8153	17.5936	17.8593	17.6612	17.7725	17.7985	24.0297	22.5434	26.0604	22.0433
383	15.2903	14.8775	14.9526	15.4505	14.9148	19.6032	16.0622	16.2103	16.3325	16.1704	17.3782	16.3781	16.279	16.5961	16.3242	18.139	19.5862	17.7543	18.9574	18.6152	20.7143	20.7537	19.8409	20.05	18.825	18.9916	21.088	19.953	21.1843	20.1944	18.2101	18.2732	24.4507	18.1829	18.3267	16.9403	17.1798	17.1974	17.2881	18.229	17.0775	17.4532	17.3202	17.3205	17.3466	23.7661	22.0286	25.7266	21.8272
384	14.9274	14.6348	14.6214	15.1357	14.6298	19.2803	15.789	15.8124	16.1117	15.6522	17.0407	16.1358	15.9009	16.2694	15.9185	17.8525	19.2872	17.6958	18.8528	18.3715	20.4353	20.414	19.5327	19.5814	18.4662	18.5682	20.5971	19.4213	20.891	19.8316	17.8074	17.8471	23.9066	17.7362	17.8761	16.5452	16.7191	16.8573	16.8537	17.6729	16.5714	16.9026	16.7211	16.7766	16.8038	23.5331	21.5262	25.2961	21.4727
385	14.6242	14.3612	14.4246	14.8886	14.4346	18.9791	15.3981	15.356	15.6518	15.4844	16.5527	15.8554	15.7341	15.9774	15.6756	17.6181	19.1078	17.5482	18.6177	18.0805	20.0763	20.2119	19.1757	19.4103	18.3324	18.3268	20.2847	19.0132	20.4842	19.4735	17.3405	17.4754	23.6302	17.385	17.4235	16.2233	16.2727	16.5419	16.5887	17.346	16.2977	16.3609	16.3166	16.4096	16.4554	23.2007	21.1937	25.0718	21.2096
386	14.4214	14.1037	14.0837	14.7363	14.1858	18.6332	15.0854	15.0217	15.2916	15.2225	16.2124	15.5862	15.4077	15.6395	15.3517	17.3113	18.8094	17.2652	18.2906	17.8494	19.876	20.0446	18.8854	19.2495	17.9656	17.9485	19.9188	18.7451	20.1899	19.1734	17.0595	17.1319	23.4029	16.9876	17.0004	15.8886	15.9153	16.1418	16.2841	17.0811	15.8911	15.9072	15.9942	16.0639	16.1069	22.968	20.9286	24.8547	20.8494
387	14.1868	13.8031	13.6906	14.3778	13.755	18.3008	14.6768	14.6964	14.9502	14.8159	15.7586	15.2334	14.958	15.2804	14.9703	16.9319	18.4958	16.7813	18.0932	17.5606	19.5589	19.7037	18.6163	18.8358	17.504	17.5495	19.4382	18.2922	19.8619	18.8895	16.725	16.7412	22.9589	16.4935	16.5688	15.4291	15.4828	15.6662	15.7524	16.6283	15.4049	15.6418	15.5935	15.5842	15.8419	22.7938	20.5194	24.3238	20.3621
388	13.9938	13.5902	13.405	14.1864	13.4772	18.0314	14.3333	14.4538	14.6233	14.5538	15.4541	14.8059	14.6061	14.9688	14.6501	16.7056	18.3107	16.4915	17.95	17.2054	19.3645	19.3269	18.3278	18.4794	17.2956	17.2569	19.171	17.9772	19.5148	18.7598	16.4433	16.5128	22.8615	16.0737	16.3609	15.1424	15.0687	15.2919	15.3287	16.2834	15.1761	15.4639	15.3216	15.3078	15.5385	22.6333	20.3202	24.1804	20.2155
389	13.8522	13.4657	13.2321	14.1683	13.4457	17.9454	14.2549	14.3348	14.4481	14.5384	15.508	14.6382	14.4772	14.8843	14.4731	16.6963	18.2195	16.4683	17.7866	17.1727	19.186	19.2216	18.2978	18.4322	17.0644	17.1231	19.0643	17.9918	19.4449	18.6289	16.2971	16.4122	22.7155	15.9172	16.1648	14.9742	15.0152	15.1506	15.2181	16.2675	15.1381	15.3658	15.183	15.1844	15.2498	22.541	20.3437	24.3105	20.1557
390	13.7657	13.4672	13.1758	14.0487	13.3822	17.866	14.1234	14.2169	14.3549	14.4505	15.5049	14.6065	14.458	14.8228	14.3013	16.7009	18.0408	16.4263	17.6581	17.1432	19.1014	19.0938	18.1805	18.3613	16.9309	17.1495	19.0404	17.9306	19.4047	18.474	16.1931	16.2784	22.5958	15.8236	16.1636	14.9274	15.0067	15.0894	15.2553	16.1864	14.9554	15.2477	15.003	15.0749	15.0914	22.4104	20.2726	24.1677	20.0112
391	13.477	13.3363	13.1389	13.8274	13.2408	17.5951	14.0137	14.1046	14.1787	14.1985	15.307	14.4376	14.2451	14.6591	14.2094	16.5021	17.9597	16.2594	17.4974	16.9404	18.8843	18.964	18.0839	18.139	16.8211	16.9883	18.8607	17.6755	19.3342	18.163	15.9293	16.0193	22.4561	15.7241	16.0384	14.6238	14.8179	14.8739	15.1665	15.9246	14.7546	15.1073	14.8915	14.8709	14.8707	22.1959	20.1592	24.0892	19.8926
392	13.3171	13.1243	12.9925	13.6654	13.0577	17.442	13.9387	13.9678	14.1127	14.0178	15.1433	14.244	14.1379	14.4484	14.105	16.2818	17.911	16.1839	17.4437	16.8637	18.8155	18.787	17.9805	18.0403	16.8407	16.8982	18.7216	17.5617	19.3556	18.0918	15.8394	15.9868	22.3964	15.6508	15.8871	14.4373	14.6861	14.6749	15.0717	15.775	14.6215	14.8649	14.8298	14.6868	14.7518	22.1917	20.1325	24.1534	19.802
393	13.2111	12.9164	12.8993	13.5662	12.9415	17.3077	13.8877	13.8119	13.9243	13.8735	15.0867	14.1018	14.0281	14.4507	13.9438	16.2432	17.7272	16.0466	17.2722	16.7454	18.7262	18.6767	17.8658	17.9525	16.6106	16.8075	18.6447	17.4151	19.1851	18.0933	15.6949	15.754	22.2799	15.4431	15.7911	14.353	14.5577	14.7069	14.966	15.5954	14.5226	14.7562	14.6607	14.6258	14.6317	22.2457	19.9795	24.2329	19.7616
394	13.0514	12.7888	12.6795	13.5126	12.7481	17.2038	13.7928	13.7497	13.8081	13.6382	14.8844	13.9935	13.8514	14.3365	13.7441	16.0647	17.5599	15.806	17.2637	16.6904	18.7602	18.5818	17.7194	17.7489	16.3889	16.7745	18.5017	17.3137	19.0297	17.955	15.5212	15.6565	22.1712	15.373	15.5324	14.3039	14.4158	14.638	14.8694	15.482	14.3083	14.6026	14.5483	14.5623	14.6388	22.1973	19.8984	24.34	19.6996
395	12.9145	12.6451	12.4591	13.3531	12.567	17.0711	13.6151	13.4478	13.6383	13.5038	14.6833	13.8308	13.6421	14.1318	13.6066	15.9275	17.3809	15.6493	17.1366	16.4925	18.677	18.3941	17.4768	17.6067	16.2265	16.4655	18.3932	17.1688	18.8949	17.7936	15.3758	15.542	22.0539	15.2391	15.3692	14.0709	14.2678	14.3951	14.683	15.3948	14.0862	14.4059	14.3795	14.3256	14.417	22.1407	19.7103	24.2502	19.4984
396	12.757	12.3686	12.2114	12.9849	12.4624	16.8856	13.3362	13.2249	13.4371	13.3408	14.3414	13.6282	13.4529	14.0199	13.3495	15.7233	17.2125	15.5485	16.928	16.1885	18.4983	18.1481	17.1809	17.4221	15.9755	16.179	18.1756	16.8952	18.6972	17.6965	15.0481	15.351	21.853	14.9431	15.2399	13.7837	14.0439	14.16	14.4783	15.1945	13.8353	14.1751	14.0743	14.09	14.0473	22.0328	19.4999	24.1663	19.2433
397	12.5354	12.2716	12.0785	12.7692	12.2178	16.7558	13.1904	13.1965	13.1785	13.0377	14.0493	13.3703	13.1421	13.745	13.135	15.4664	17.0833	15.4447	16.8105	16.0281	18.306	18.0168	17.0547	17.2673	15.8102	16.042	18.0177	16.7436	18.5537	17.4622	14.87	15.1663	21.6757	14.7203	15.1075	13.5045	13.8043	13.9187	14.2703	14.8693	13.705	13.9917	13.8212	13.8583	13.865	21.9527	19.431	24.0429	19.0405
398	12.3431	12.1176	11.9842	12.6401	12.08	16.5507	13.082	13.1023	12.9791	12.8786	13.9989	13.0601	12.9568	13.5661	12.977	15.3419	17.0057	15.3835	16.718	15.9567	18.206	17.8219	16.9878	17.1819	15.7177	15.957	17.8203	16.6336	18.4241	17.2372	14.7647	14.8138	21.5528	14.594	14.9232	13.4745	13.5757	13.754	14.0663	14.5795	13.5285	13.8384	13.6226	13.6621	13.6508	21.8318	19.2992	24.08	18.8206
399	12.1777	12.0025	11.9144	12.629	11.8533	16.4768	12.932	12.8833	12.9146	12.8627	13.9832	12.9311	12.8886	13.4635	12.8298	15.3423	16.9126	15.2323	16.6148	15.9576	18.159	17.6337	16.8905	17.0723	15.5723	15.8229	17.6587	16.5215	18.2178	17.1264	14.6279	14.7085	21.3882	14.5323	14.7659	13.3956	13.4685	13.5962	13.9254	14.4536	13.3034	13.6582	13.513	13.454	13.4707	21.6826	19.3062	23.9708	18.7474
400	12.1421	11.9934	11.7981	12.5558	11.7919	16.405	12.8439	12.8151	12.9	12.849	13.9035	12.8673	12.7217	13.3226	12.7467	15.2988	16.8477	15.1206	16.5357	15.8872	18.056	17.4691	16.8342	16.9762	15.4505	15.7549	17.5238	16.353	18.1582	17.0866	14.5576	14.6833	21.3097	14.4176	14.6166	13.2821	13.3128	13.5421	13.8836	14.4685	13.1838	13.5253	13.3821	13.3584	13.3129	21.5463	19.3306	23.968	18.6648
401	11.932	11.8336	11.6231	12.3663	11.7112	16.3057	12.6031	12.6047	12.6731	12.6376	13.6673	12.76	12.5066	13.2179	12.5078	15.0968	16.5688	14.9236	16.4109	15.6442	17.9111	17.3456	16.6636	16.8493	15.2997	15.5166	17.4203	16.1774	18.0648	16.9157	14.3413	14.4888	21.2236	14.1507	14.42	13.0331	13.0513	13.2883	13.7175	14.2595	12.9377	13.3159	13.1992	13.1048	13.1434	21.423	19.1292	23.9697	18.5567
402	11.7775	11.6414	11.3974	12.1357	11.4739	16.11	12.4273	12.3898	12.3899	12.4157	13.4262	12.592	12.356	13	12.3286	14.8945	16.4995	14.7466	16.304	15.3968	17.8024	17.2113	16.4336	16.6761	15.0859	15.2791	17.2287	16.0376	17.889	16.7271	14.0541	14.2804	21.1723	13.9539	14.2788	12.7548	12.8659	12.9996	13.4752	13.9969	12.6839	13.1018	12.9403	12.8688	12.9826	21.3079	19.0141	23.8308	18.3691
403	11.5686	11.4305	11.1828	11.9531	11.1947	15.8736	12.172	12.1369	12.1434	12.1532	13.2289	12.3	12.1901	12.7691	12.1298	14.6606	16.3085	14.604	16.0758	15.2417	17.6336	16.9997	16.1678	16.4096	14.9359	15.0537	17.0351	15.8578	17.6005	16.5969	13.7491	14.0832	20.9476	13.6534	14.0457	12.4162	12.6615	12.7603	13.1265	13.7222	12.4455	12.8409	12.6469	12.6588	12.6461	21.1799	18.8909	23.7388	18.1642
404	11.5166	11.2905	11.0634	11.8298	11.164	15.773	12.0405	12.0159	12.0144	11.9996	13.0801	12.1014	12.0415	12.6185	11.9626	14.6178	16.2064	14.4831	15.9821	15.1775	17.6786	16.8272	16.1101	16.1703	14.8073	15.0061	16.9683	15.6757	17.4797	16.4766	13.614	13.8855	20.8024	13.5535	13.9754	12.2656	12.5652	12.6483	13.0601	13.6304	12.347	12.6751	12.5241	12.5609	12.4778	21.1736	18.8727	23.7823	18.0776
405	11.4445	11.2594	11.0671	11.8596	11.1556	15.7365	12.0312	12.0122	11.9848	11.9732	12.9543	12.0814	11.9594	12.5209	11.8576	14.6629	16.1705	14.4844	16.0285	15.1615	17.7468	16.8181	16.0755	16.0738	14.675	14.994	16.9516	15.6216	17.4498	16.3835	13.5925	13.8953	20.7395	13.5784	13.9368	12.2558	12.5107	12.6101	13.1381	13.5492	12.2737	12.5655	12.5419	12.4077	12.4232	21.1868	18.8384	23.824	18.0577
406	11.3066	11.2314	11.0231	11.8822	11.0911	15.6899	11.9691	12.0191	11.8982	11.844	12.8536	12.0056	11.8381	12.4043	11.7924	14.5441	16.1312	14.4696	15.9565	15.1319	17.6409	16.7417	15.9736	16.0477	14.5253	14.915	16.7947	15.5574	17.4395	16.3557	13.4951	13.7669	20.5926	13.4887	13.8526	12.1615	12.3069	12.4812	13.0468	13.4641	12.1456	12.4822	12.4328	12.2298	12.3309	21.1889	18.7079	23.8628	17.9932
407	11.2696	11.1786	11.0537	11.8794	11.0539	15.6397	11.9282	11.956	11.7982	11.747	12.819	11.9396	11.8049	12.3642	11.7593	14.5183	16.1048	14.4604	15.9617	15.0737	17.6049	16.7135	15.966	16.0814	14.5643	14.9025	16.7638	15.5414	17.4636	16.3067	13.4479	13.6891	20.5671	13.3794	13.8118	12.1035	12.2649	12.3428	12.9433	13.3439	12.0685	12.4327	12.2314	12.1718	12.2031	21.1511	18.6721	23.779	17.9851
408	11.2198	11.1341	10.9423	11.7536	11.0282	15.534	11.7911	11.8376	11.7582	11.6843	12.7216	11.8251	11.7174	12.2789	11.5802	14.4492	16.1109	14.3692	15.9211	14.9932	17.5902	16.6934	15.8858	15.9883	14.5271	14.8364	16.7051	15.4673	17.3562	16.2505	13.2708	13.591	20.4679	13.2861	13.7708	11.9537	12.1326	12.2052	12.8293	13.2666	11.919	12.2724	12.14	12.0578	12.1466	21.1568	18.7345	23.7972	17.9305
409	11.0699	11.0507	10.7932	11.5956	10.889	15.4628	11.6568	11.6424	11.5956	11.5535	12.5149	11.6674	11.5581	12.1392	11.3772	14.3269	16.0061	14.2482	15.7953	14.906	17.541	16.526	15.7319	15.8324	14.3213	14.6898	16.559	15.3058	17.2512	16.0817	13.1034	13.4728	20.3335	13.1115	13.6413	11.7428	11.9126	12.0769	12.6752	13.1007	11.7096	12.0966	12.0056	11.8524	11.9331	21.1066	18.721	23.7571	17.8131
410	10.8816	10.9036	10.6915	11.439	10.7321	15.3922	11.5134	11.5094	11.4058	11.3841	12.2927	11.4866	11.3643	11.9738	11.1898	14.2305	15.8593	14.1403	15.7372	14.7604	17.4289	16.3623	15.5631	15.6723	14.0884	14.5228	16.4324	15.0982	17.1167	15.9545	12.9311	13.3312	20.2096	12.963	13.451	11.5645	11.7476	11.8905	12.481	12.9134	11.5435	11.8847	11.8029	11.6958	11.7039	21.0038	18.5688	23.6683	17.6471
411	10.8026	10.8144	10.6247	11.3577	10.6388	15.3171	11.436	11.4043	11.3445	11.3373	12.2303	11.3669	11.2228	11.8965	11.1017	14.1739	15.8443	14.1011	15.6442	14.6731	17.3754	16.2957	15.5037	15.5876	14.0034	14.4684	16.324	14.9494	16.9269	15.8775	12.8617	13.2683	20.1066	12.8621	13.3546	11.5145	11.6773	11.7747	12.4506	12.7792	11.4511	11.7467	11.6287	11.7041	11.6081	20.9289	18.4448	23.6738	17.5158
412	10.7361	10.7455	10.4467	11.2209	10.5035	15.179	11.3605	11.2675	11.3022	11.2628	12.0981	11.2533	11.0869	11.7791	11.0339	14.0714	15.7932	14.0453	15.5697	14.6251	17.3105	16.2439	15.4268	15.4994	13.9193	14.3733	16.2567	14.85	16.796	15.8133	12.7505	13.1215	19.9688	12.763	13.3078	11.4303	11.5836	11.6616	12.3651	12.6897	11.3361	11.6629	11.549	11.5529	11.4913	20.838	18.4127	23.638	17.4503
413	10.6795	10.6552	10.3436	11.1432	10.3881	15.0641	11.2904	11.1787	11.2771	11.1329	11.9777	11.165	10.9871	11.6905	10.9521	14.0083	15.7391	13.9498	15.5216	14.5589	17.2815	16.1434	15.3381	15.3738	13.815	14.2758	16.1561	14.8689	16.6844	15.7305	12.5607	13.0196	19.8544	12.6916	13.2034	11.3483	11.5216	11.6085	12.2359	12.6341	11.2145	11.5427	11.4919	11.3814	11.4177	20.7426	18.414	23.5789	17.439
414	10.622	10.6668	10.3631	11.172	10.4069	15.0542	11.2751	11.1565	11.2033	11.0763	11.9225	11.1551	10.9888	11.7024	10.9537	14.0301	15.6889	13.9645	15.5313	14.5966	17.284	16.1237	15.317	15.3471	13.8137	14.2387	16.1354	14.8519	16.6983	15.7224	12.5923	13.003	19.8778	12.6544	13.1832	11.2827	11.4963	11.5772	12.2234	12.6004	11.2043	11.5365	11.4648	11.3822	11.4108	20.7776	18.4283	23.6939	17.404
415	10.484	10.5355	10.2653	11.0588	10.3772	14.9285	11.2331	11.0429	11.0901	11.0286	11.8061	11.1133	10.9799	11.5741	10.866	13.9374	15.6234	13.8635	15.5257	14.4932	17.196	16.0758	15.2204	15.3019	13.7572	14.2209	16.0828	14.7667	16.626	15.6553	12.557	12.907	19.8162	12.5947	13.1449	11.2168	11.4729	11.4612	12.1455	12.5082	11.1172	11.4744	11.4041	11.2894	11.3712	20.7996	18.4093	23.7227	17.3708
416	10.3097	10.3548	10.1079	10.8677	10.2757	14.8283	11.0702	10.9444	10.9748	10.8989	11.6697	10.9477	10.8613	11.4115	10.6986	13.7787	15.4816	13.7468	15.3749	14.3536	17.1228	15.9128	15.113	15.1342	13.6344	14.1127	15.9578	14.6144	16.4996	15.5509	12.3781	12.7477	19.6376	12.4835	13.0656	11.0684	11.3215	11.3017	12.0381	12.4276	10.9578	11.353	11.2288	11.1284	11.2145	20.7233	18.3428	23.6014	17.2925
417	10.1736	10.1704	9.9518	10.7345	10.0648	14.7557	10.8692	10.8125	10.8043	10.7647	11.51	10.834	10.7254	11.2711	10.5531	13.6281	15.3649	13.622	15.1919	14.2236	17.039	15.8283	14.9422	15.0104	13.5003	13.9618	15.7745	14.4978	16.3487	15.4077	12.2241	12.6217	19.4653	12.3167	12.9495	10.9113	11.1051	11.1571	11.8765	12.2668	10.8295	11.1875	11.0448	10.9646	11.0333	20.6384	18.2072	23.5302	17.1824
418	10.1219	10.0777	9.8834	10.6404	9.9431	14.6507	10.7826	10.7319	10.68	10.6122	11.3991	10.6936	10.6159	11.1553	10.4216	13.5386	15.3296	13.5387	15.1058	14.1059	16.999	15.7408	14.8125	14.9327	13.3929	13.9109	15.6494	14.4139	16.2413	15.3116	12.1156	12.5163	19.3948	12.2298	12.8488	10.789	10.9783	11.0803	11.7695	12.1803	10.7257	11.0839	10.9416	10.8723	10.916	20.5373	18.1194	23.4397	17.079
419	9.9571	9.902	9.7105	10.4683	9.7718	14.5077	10.6547	10.5474	10.482	10.4263	11.2284	10.5602	10.4803	11.0521	10.2611	13.3914	15.1614	13.3572	14.9633	13.9254	16.8277	15.557	14.685	14.7848	13.2244	13.7482	15.5292	14.2866	16.0721	15.1898	11.9756	12.4122	19.298	12.0962	12.7377	10.6413	10.7827	10.9225	11.6682	12.0047	10.5356	10.9276	10.8018	10.7225	10.6949	20.383	17.9909	23.3684	16.9856
420	9.7981	9.7931	9.5911	10.3111	9.6469	14.3639	10.5729	10.3793	10.3423	10.3074	11.0587	10.3982	10.3051	10.9449	10.135	13.2575	15.0148	13.2523	14.8517	13.8326	16.6758	15.42	14.5617	14.6291	13.1095	13.6601	15.4966	14.1668	16.0094	15.112	11.8616	12.2654	19.1951	12.0064	12.6536	10.5436	10.6805	10.7745	11.6123	11.8991	10.3865	10.794	10.6656	10.5692	10.5673	20.281	17.9485	23.383	16.9151
421	9.6742	9.67	9.4774	10.1987	9.5448	14.278	10.4551	10.2812	10.2436	10.2244	10.9355	10.2668	10.2079	10.845	10.103	13.1844	14.8683	13.0768	14.7798	13.767	16.5573	15.3161	14.5129	14.4895	12.9958	13.5682	15.4567	14.075	15.9949	15.032	11.7556	12.1496	19.0391	11.9104	12.579	10.4404	10.6224	10.6681	11.5256	11.7888	10.2694	10.6692	10.5791	10.4632	10.5039	20.1932	17.9301	23.3362	16.8843
422	9.5947	9.5806	9.3845	10.0492	9.3918	14.1675	10.3181	10.1946	10.1579	10.163	10.8383	10.1882	10.1195	10.7049	10.0188	13.0931	14.7281	12.9957	14.6567	13.6655	16.4846	15.2411	14.4296	14.3718	12.8636	13.4562	15.4083	14.0115	15.9097	14.9963	11.6937	12.045	18.8927	11.7847	12.5225	10.3468	10.5688	10.5952	11.4421	11.6829	10.1896	10.5753	10.4586	10.3893	10.45	20.0927	17.8494	23.2944	16.8045
423	9.4689	9.4761	9.2469	9.9077	9.281	13.9697	10.2136	10.0557	10.0436	10.0071	10.6838	10.0558	10.0006	10.5749	9.8572	12.9005	14.601	12.9124	14.502	13.5094	16.3358	15.0542	14.3125	14.2547	12.7159	13.3412	15.2687	13.921	15.7568	14.8998	11.6048	11.9256	18.8016	11.6686	12.466	10.266	10.4671	10.5109	11.3565	11.5941	10.1232	10.4389	10.314	10.2845	10.3346	19.9959	17.7133	23.1924	16.6658
424	9.3208	9.3618	9.133	9.7648	9.2048	13.796	10.1014	9.8921	9.904	9.8671	10.5667	9.9248	9.8607	10.4963	9.7314	12.7332	14.5251	12.7917	14.3218	13.3687	16.1852	14.9559	14.1901	14.1234	12.6069	13.2513	15.1052	13.7773	15.6272	14.7492	11.4504	11.8108	18.6701	11.6012	12.3	10.1436	10.3261	10.3564	11.2359	11.5051	10.0108	10.3391	10.1944	10.1856	10.1896	19.9214	17.5852	23.0795	16.5838
425	9.1832	9.2242	9.0016	9.613	9.0669	13.6958	9.9616	9.7756	9.7401	9.695	10.437	9.7964	9.7165	10.3623	9.636	12.6719	14.3966	12.6826	14.1429	13.2661	16.0423	14.8106	14.0359	13.9276	12.4755	13.1331	14.9594	13.6437	15.515	14.6253	11.2696	11.6517	18.451	11.4721	12.1914	10.0188	10.1487	10.1992	11.0968	11.3713	9.8558	10.2032	10.0495	9.9953	10.1329	19.8141	17.4471	22.8762	16.4357
426	9.0187	9.0674	8.8185	9.5271	8.8869	13.5629	9.8324	9.6322	9.6116	9.5406	10.2943	9.6073	9.5621	10.1892	9.4286	12.4984	14.209	12.5387	14.0218	13.1202	15.9245	14.6253	13.8256	13.7468	12.3427	12.9512	14.7692	13.4626	15.3508	14.479	11.0855	11.4703	18.217	11.3183	12.0959	9.8777	10.0474	10.0173	10.9197	11.1975	9.6355	10.0327	9.9064	9.8127	9.9726	19.5649	17.3107	22.6973	16.3332
427	8.8294	8.8756	8.6296	9.3196	8.7223	13.3642	9.6511	9.4523	9.4629	9.3777	10.0193	9.4336	9.3337	9.9831	9.1924	12.2276	14.015	12.3116	13.8892	12.9564	15.7565	14.4021	13.6428	13.5206	12.1247	12.7348	14.5492	13.2322	15.0755	14.2422	10.9514	11.2992	18.0204	11.148	11.9774	9.6337	9.8279	9.8232	10.7241	11.002	9.3903	9.8228	9.7276	9.6043	9.706	19.354	17.1368	22.4688	16.1127
428	8.7035	8.7212	8.5038	9.1767	8.5415	13.1793	9.4621	9.2882	9.2563	9.2098	9.8083	9.3132	9.1702	9.7843	9.0624	12.0694	13.8658	12.1624	13.7309	12.8122	15.5571	14.2902	13.4465	13.3352	11.9145	12.5791	14.4007	13.0469	14.8779	14.1787	10.827	11.1553	17.8496	10.9677	11.8406	9.472	9.6338	9.6707	10.5793	10.8975	9.2607	9.653	9.5394	9.4451	9.5333	19.1628	16.9742	22.3335	15.9046
429	8.5531	8.5883	8.4044	9.0365	8.4132	12.993	9.3021	9.1168	9.1327	9.0671	9.6545	9.165	9.0515	9.661	8.9523	11.9763	13.7529	12.0169	13.587	12.6828	15.3887	14.2152	13.292	13.1679	11.7227	12.4147	14.2673	12.8898	14.6989	14.0599	10.6611	10.9838	17.6746	10.8195	11.709	9.342	9.5177	9.522	10.475	10.7829	9.096	9.5172	9.3899	9.2585	9.4157	19.0606	16.8761	22.238	15.7965
430	8.3892	8.4553	8.2252	8.8758	8.2678	12.7859	9.1949	8.9607	8.9786	8.901	9.4815	8.9575	8.8633	9.5343	8.7957	11.8347	13.6101	11.8853	13.4473	12.5023	15.1966	14.068	13.1387	12.9665	11.5546	12.3002	14.1238	12.6951	14.5186	13.8632	10.4862	10.8397	17.471	10.6899	11.5123	9.1749	9.352	9.3554	10.3172	10.5899	8.9339	9.3176	9.1893	9.0969	9.2363	18.8664	16.7023	22.0921	15.6219
431	8.2101	8.2954	8.036	8.6882	8.1044	12.61	9.0123	8.8117	8.798	8.7636	9.2663	8.7646	8.6835	9.3599	8.6168	11.6054	13.4269	11.7112	13.2762	12.3526	15.0311	13.861	12.946	12.7513	11.436	12.1074	13.9169	12.553	14.4178	13.6528	10.3055	10.684	17.2859	10.4668	11.3837	8.9725	9.147	9.1771	10.0883	10.3809	8.7191	9.1167	8.995	8.9198	8.9943	18.5997	16.5102	21.9483	15.4161
432	8.0745	8.1243	7.9025	8.5406	7.9948	12.4493	8.8259	8.6331	8.629	8.5907	9.0956	8.616	8.5123	9.166	8.408	11.48	13.2522	11.52	13.0943	12.1802	14.8643	13.6558	12.7809	12.6175	11.28	11.9489	13.7233	12.397	14.2792	13.493	10.1107	10.4853	17.0616	10.3663	11.2218	8.7953	8.9583	8.9943	9.8897	10.2291	8.5829	8.9391	8.8548	8.7382	8.7812	18.3361	16.3944	21.7125	15.258
433	7.976	8.0291	7.8072	8.4335	7.8719	12.3246	8.7018	8.4698	8.506	8.4893	8.9562	8.4932	8.4003	9.0375	8.2956	11.4026	13.1282	11.4299	12.9714	12.0625	14.7608	13.5603	12.6212	12.4922	11.1115	11.7932	13.5967	12.2764	14.1276	13.3828	9.9996	10.3826	16.8933	10.2344	11.0894	8.6813	8.8515	8.8827	9.8055	10.1175	8.459	8.8141	8.778	8.6243	8.6715	18.2073	16.2972	21.5733	15.1156
434	7.8966	7.9187	7.6961	8.3438	7.7753	12.1774	8.5695	8.3816	8.3548	8.323	8.8406	8.3879	8.3211	8.9449	8.1587	11.2922	13.0659	11.3238	12.8826	11.9412	14.646	13.4261	12.4683	12.3131	10.9498	11.7191	13.4859	12.1475	13.9891	13.2721	9.8835	10.2771	16.7747	10.1544	10.9994	8.629	8.7574	8.7838	9.707	10.0277	8.3642	8.6926	8.6508	8.5354	8.5963	18.0967	16.1896	21.4951	15.01
435	7.802	7.7999	7.6072	8.2301	7.6516	12.0355	8.4658	8.2754	8.2405	8.2114	8.7295	8.2502	8.2213	8.8239	8.0498	11.1845	12.99	11.2324	12.7947	11.9079	14.514	13.3159	12.3447	12.1576	10.8241	11.6163	13.3432	12.0361	13.8729	13.1788	9.7321	10.1554	16.6179	10.0438	10.9434	8.504	8.6334	8.6761	9.5964	9.9091	8.2456	8.544	8.5351	8.3904	8.4829	17.9656	16.0759	21.3858	14.8911
436	7.6596	7.6888	7.5045	8.0975	7.5119	11.8944	8.3405	8.12	8.1374	8.0722	8.5576	8.1217	8.0939	8.6573	7.8984	11.0372	12.8791	11.0996	12.6608	11.814	14.3677	13.1346	12.2274	12.0419	10.6976	11.492	13.1798	11.9028	13.7133	13.0359	9.582	10.0022	16.4161	9.9069	10.8384	8.3439	8.47	8.523	9.4741	9.7561	8.0793	8.3956	8.387	8.2232	8.3326	17.8182	15.9682	21.2175	14.7324
437	7.5872	7.6241	7.3981	8.002	7.4503	11.8371	8.2775	8.0586	8.0404	7.9865	8.4776	8.0369	7.9955	8.5278	7.8058	10.9716	12.7569	11.0008	12.5934	11.7318	14.2684	13.0247	12.1686	11.9199	10.6029	11.4077	13.0749	11.8318	13.5852	12.9744	9.4892	9.9241	16.2494	9.8368	10.7589	8.2475	8.3789	8.4343	9.3953	9.6778	7.9469	8.319	8.268	8.1496	8.2761	17.6907	15.8709	21.142	14.6741
438	7.5508	7.6113	7.3547	7.9848	7.4129	11.7882	8.2449	8.0378	7.973	7.9489	8.4479	8.0174	7.9233	8.4896	7.7644	10.9234	12.6953	10.9977	12.5553	11.6889	14.1722	13.0146	12.1128	11.8532	10.5393	11.3785	13.011	11.7882	13.5243	12.9335	9.4254	9.8944	16.1446	9.7968	10.7559	8.2134	8.3707	8.3985	9.3743	9.6507	7.909	8.2759	8.2415	8.0945	8.228	17.6077	15.8348	21.081	14.6175
439	7.4662	7.5198	7.2992	7.9028	7.3487	11.7016	8.1546	7.9665	7.8923	7.8992	8.35	7.9629	7.8645	8.4512	7.713	10.8489	12.6431	10.9726	12.4908	11.6213	14.0659	12.9357	11.993	11.7373	10.4222	11.303	12.984	11.7245	13.4433	12.8656	9.3747	9.7962	16.0525	9.7083	10.7164	8.143	8.305	8.3018	9.3461	9.5933	7.8605	8.2069	8.1882	8.0444	8.129	17.5402	15.7736	20.9601	14.5735
440	7.42	7.4838	7.2591	7.8438	7.3009	11.6324	8.1168	7.8998	7.8525	7.8738	8.278	7.8953	7.8325	8.3959	7.7007	10.7862	12.6196	10.9194	12.4805	11.5796	14.0162	12.8703	11.9436	11.6224	10.3885	11.268	12.9445	11.6875	13.4254	12.8178	9.3266	9.7486	15.9851	9.6828	10.7056	8.0718	8.2562	8.2572	9.324	9.5444	7.8071	8.1722	8.1407	7.9696	8.0599	17.5379	15.7101	20.9399	14.5501
441	7.3318	7.3864	7.1461	7.785	7.2206	11.5003	8.0185	7.8134	7.7493	7.7567	8.1984	7.7783	7.728	8.2757	7.6043	10.7169	12.565	10.7857	12.3951	11.5297	13.9214	12.7809	11.8765	11.5063	10.3264	11.1849	12.9045	11.5696	13.3296	12.7583	9.2172	9.6666	15.8552	9.6351	10.6316	7.9801	8.1655	8.2024	9.24	9.4462	7.7118	8.0685	8.0208	7.8602	7.962	17.4889	15.6095	20.863	14.4649
442	7.2683	7.3164	7.0631	7.7029	7.1431	11.3598	7.9114	7.7372	7.658	7.659	8.0853	7.6964	7.6305	8.1972	7.5092	10.6615	12.4807	10.6908	12.2968	11.4775	13.8093	12.6862	11.7774	11.4191	10.2505	11.1298	12.8553	11.4676	13.2071	12.6746	9.1133	9.5817	15.7526	9.5423	10.5667	7.8905	8.0645	8.1025	9.1562	9.3901	7.5801	7.9589	7.9052	7.7897	7.8878	17.4146	15.5156	20.7516	14.3693
443	7.2241	7.2561	7.0252	7.6337	7.0826	11.266	7.8768	7.6575	7.6076	7.568	7.9988	7.6456	7.5593	8.1476	7.4502	10.6101	12.3947	10.6597	12.2293	11.4278	13.7427	12.6281	11.7234	11.3643	10.2003	11.089	12.7797	11.4468	13.139	12.5777	9.0644	9.5035	15.6994	9.4913	10.5188	7.8357	8.0222	8.0112	9.091	9.3464	7.5072	7.8768	7.8218	7.7441	7.8268	17.3616	15.4969	20.7349	14.2945
444	7.1397	7.1671	6.9574	7.5118	7.0133	11.2071	7.801	7.5849	7.5205	7.4857	7.9209	7.5607	7.4501	8.0708	7.366	10.5344	12.3087	10.5922	12.1532	11.36	13.6849	12.5573	11.6505	11.2986	10.1096	11.0135	12.7338	11.3923	13.0791	12.5397	8.9867	9.4689	15.6268	9.4367	10.4941	7.7536	7.9533	7.9336	9.0224	9.2928	7.4593	7.8302	7.7363	7.6539	7.7216	17.2826	15.4754	20.7318	14.2394
445	7.0689	7.1088	6.8769	7.4249	6.9478	11.1195	7.7052	7.5004	7.4304	7.4191	7.862	7.4739	7.3851	7.9898	7.2986	10.4747	12.2562	10.5288	12.1055	11.3172	13.6679	12.483	11.608	11.2257	10.0273	10.9579	12.6963	11.3378	13.0359	12.5479	8.9214	9.3957	15.5869	9.3962	10.4491	7.7078	7.9044	7.9026	8.983	9.2615	7.4001	7.7654	7.6748	7.5756	7.6665	17.2126	15.4549	20.6785	14.2159
446	7.0637	7.1157	6.8745	7.4441	6.9292	11.1285	7.7081	7.5163	7.455	7.4283	7.8819	7.4819	7.4425	8.0211	7.2871	10.4973	12.3192	10.5759	12.1596	11.3325	13.7278	12.5144	11.6529	11.2375	10.0262	10.9791	12.7305	11.3432	13.0953	12.5994	8.9207	9.3917	15.624	9.4394	10.5192	7.7585	7.9605	7.9243	9.0247	9.3056	7.4053	7.7517	7.7058	7.5904	7.7102	17.3056	15.5349	20.7359	14.25
447	6.9906	7.0714	6.807	7.4029	6.8722	11.066	7.6414	7.435	7.4137	7.3743	7.8007	7.4211	7.3857	7.9583	7.2284	10.4271	12.2823	10.5246	12.138	11.2934	13.6902	12.4895	11.641	11.1865	9.976	10.9525	12.7105	11.2926	13.0455	12.574	8.8801	9.3482	15.5832	9.3889	10.5059	7.6877	7.8776	7.8671	8.9953	9.2625	7.3428	7.6741	7.6241	7.5284	7.628	17.3156	15.5028	20.7435	14.2043
448	6.8656	6.9446	6.6814	7.2658	6.7597	10.9231	7.5166	7.2935	7.2739	7.2464	7.6723	7.2983	7.2632	7.8367	7.1174	10.3448	12.1711	10.3998	12.054	11.1859	13.568	12.3508	11.5299	11.0478	9.8653	10.8404	12.5931	11.172	12.9558	12.4651	8.7506	9.2352	15.4692	9.2548	10.4068	7.5513	7.7419	7.7309	8.8709	9.1527	7.1854	7.5445	7.5054	7.3886	7.4887	17.2358	15.3804	20.6573	14.1164
449	6.8894	6.9559	6.6842	7.2851	6.7641	10.9334	7.5099	7.3034	7.2639	7.2445	7.6696	7.2982	7.2546	7.814	7.0902	10.3586	12.2329	10.4379	12.0771	11.2255	13.5656	12.3346	11.5033	11.0339	9.8645	10.861	12.5944	11.1913	12.9613	12.4791	8.7441	9.2567	15.4373	9.252	10.4112	7.5305	7.7183	7.7576	8.867	9.2031	7.1418	7.543	7.4946	7.374	7.468	17.3042	15.3937	20.7356	14.1268
450	6.8915	6.9379	6.7054	7.2777	6.7677	10.9561	7.4896	7.3139	7.2377	7.1967	7.6455	7.2801	7.2465	7.8029	7.0823	10.3678	12.2574	10.4502	12.0818	11.2407	13.5815	12.3244	11.4878	10.997	9.8663	10.8737	12.5553	11.1786	12.9631	12.4949	8.7518	9.2689	15.4281	9.2571	10.4372	7.5215	7.7156	7.7618	8.8636	9.2417	7.1609	7.5406	7.491	7.3361	7.4421	17.3231	15.4239	20.7896	14.1407
451	6.869	6.9005	6.6895	7.2233	6.745	10.9311	7.4633	7.2658	7.2075	7.1569	7.599	7.2626	7.1985	7.7931	7.0671	10.3162	12.2565	10.4195	12.0905	11.2108	13.5479	12.3386	11.5066	10.9432	9.8248	10.9127	12.5667	11.1921	13.0099	12.4943	8.764	9.2513	15.4137	9.2564	10.4667	7.5289	7.6934	7.7443	8.8706	9.2502	7.1546	7.5109	7.4783	7.3142	7.4228	17.3293	15.4464	20.802	14.1222
452	6.8814	6.9076	6.7191	7.253	6.7747	10.9475	7.5256	7.2629	7.2136	7.2085	7.6242	7.2734	7.2411	7.8341	7.0981	10.3799	12.2875	10.4602	12.1521	11.2536	13.5826	12.4094	11.5511	10.9938	9.8828	10.9738	12.6546	11.287	13.089	12.5483	8.8247	9.2727	15.4621	9.3228	10.5316	7.5463	7.735	7.7727	8.9489	9.3046	7.1865	7.5459	7.5109	7.3494	7.4598	17.4364	15.5564	20.9013	14.2057
453	6.8774	6.9259	6.6841	7.2424	6.7396	10.9516	7.5194	7.2413	7.212	7.2274	7.6209	7.2658	7.2754	7.8345	7.1099	10.4198	12.3295	10.5	12.1771	11.2728	13.6322	12.4396	11.5789	11.0023	9.9052	11.0146	12.6537	11.3116	13.1242	12.6015	8.8008	9.2712	15.4806	9.3502	10.5871	7.5589	7.7611	7.7892	8.9955	9.3261	7.1886	7.5658	7.4887	7.3558	7.4638	17.5341	15.6157	20.979	14.2866
454	6.8096	6.8668	6.594	7.1521	6.6363	10.8843	7.4294	7.1618	7.1582	7.1171	7.5473	7.2017	7.1834	7.7798	7.0406	10.372	12.2699	10.4278	12.143	11.2369	13.5863	12.4037	11.53	10.934	9.8381	10.9758	12.6203	11.257	13.0911	12.5805	8.7248	9.2006	15.432	9.3282	10.5731	7.5135	7.6945	7.7294	8.9465	9.2733	7.1039	7.5153	7.4249	7.2825	7.4133	17.4885	15.5672	20.9806	14.2384
455	6.7853	6.82	6.5438	7.1327	6.6185	10.8459	7.3886	7.1372	7.0826	7.0651	7.5041	7.1612	7.1237	7.7255	7.0048	10.3466	12.2651	10.3963	12.1163	11.2047	13.5466	12.3887	11.4885	10.9091	9.8265	10.9606	12.6254	11.249	13.0686	12.5626	8.6845	9.1752	15.3865	9.2813	10.5379	7.4858	7.6685	7.6856	8.9274	9.2811	7.0646	7.4555	7.4034	7.2455	7.3589	17.4837	15.5672	21.0317	14.2222
456	6.734	6.7974	6.5503	7.1005	6.5999	10.836	7.3448	7.1122	7.0529	7.0333	7.4943	7.149	7.0918	7.6467	6.9761	10.3477	12.2427	10.3724	12.1383	11.2208	13.5996	12.3572	11.4778	10.9004	9.784	10.968	12.636	11.2572	13.0603	12.5686	8.6666	9.1812	15.384	9.2768	10.5446	7.4459	7.6337	7.6579	8.9194	9.2748	7.0134	7.4058	7.3572	7.2128	7.3171	17.5094	15.5902	21.1244	14.2293
457	6.7047	6.7652	6.5083	7.0621	6.5572	10.8132	7.3024	7.0578	7.0027	6.965	7.4529	7.072	7.0587	7.5995	6.9283	10.3254	12.225	10.3447	12.0813	11.1971	13.62	12.3394	11.4442	10.8682	9.7147	10.9369	12.5956	11.2253	13.0395	12.5649	8.6511	9.1594	15.3744	9.2699	10.5398	7.373	7.5903	7.6062	8.8831	9.232	6.972	7.3517	7.3153	7.158	7.256	17.5024	15.5839	21.1459	14.1814
458	6.6604	6.7232	6.458	7.0279	6.5146	10.7731	7.2593	7.0325	6.9724	6.9377	7.3981	7.0246	7.0371	7.5699	6.8737	10.2925	12.2262	10.3035	12.0416	11.1799	13.6463	12.3241	11.461	10.8325	9.7082	10.9072	12.6159	11.2048	13.0502	12.5579	8.6188	9.1122	15.3902	9.2417	10.5142	7.3448	7.5725	7.586	8.8605	9.2404	6.9456	7.3362	7.2899	7.1164	7.1975	17.4941	15.621	21.1927	14.138
459	6.6398	6.687	6.4347	6.9771	6.5081	10.7446	7.2465	7.0078	6.9283	6.9156	7.3586	7.0268	7.0135	7.5598	6.8467	10.2784	12.2633	10.3006	12.0872	11.2044	13.6698	12.37	11.483	10.8136	9.7326	10.9224	12.6641	11.2316	13.0594	12.5907	8.5878	9.1058	15.3972	9.2497	10.5429	7.3511	7.5508	7.5688	8.8519	9.2263	6.9206	7.2841	7.254	7.128	7.1895	17.5401	15.6746	21.3141	14.1593
460	6.6368	6.6597	6.4321	6.9727	6.5219	10.7338	7.2527	6.9756	6.9313	6.9038	7.348	7.0324	6.9766	7.5536	6.8322	10.2969	12.3069	10.3535	12.1612	11.2488	13.7445	12.3769	11.4886	10.8411	9.7357	10.9631	12.724	11.254	13.0966	12.6045	8.5893	9.0965	15.3966	9.2833	10.6077	7.3459	7.5439	7.5573	8.8858	9.2299	6.8931	7.2536	7.2362	7.1389	7.1736	17.5952	15.7089	21.3786	14.2153
461	6.6184	6.6516	6.3786	6.9769	6.5053	10.7149	7.22	6.9614	6.8948	6.8804	7.3329	7.0072	6.9737	7.5674	6.815	10.3007	12.3274	10.3687	12.2072	11.2744	13.7768	12.379	11.4978	10.8501	9.7326	10.9773	12.7245	11.2701	13.1338	12.5989	8.5675	9.1021	15.4118	9.2791	10.6139	7.3144	7.552	7.5546	8.9103	9.2193	6.8759	7.2459	7.1962	7.0838	7.151	17.6074	15.7136	21.3917	14.218
462	6.641	6.6557	6.381	6.9978	6.5002	10.7199	7.1881	6.956	6.8575	6.8503	7.3037	6.992	6.969	7.5652	6.8237	10.3268	12.3691	10.4022	12.2481	11.3084	13.8029	12.4108	11.527	10.8517	9.7456	10.9919	12.7403	11.3092	13.1756	12.6461	8.5661	9.1124	15.43	9.296	10.6588	7.3178	7.5455	7.5726	8.9367	9.1987	6.8689	7.2371	7.181	7.0685	7.1233	17.6391	15.744	21.4735	14.2259
463	6.6598	6.6951	6.4378	7.0116	6.5192	10.7849	7.2357	6.968	6.8992	6.8607	7.3448	7.0199	7.0093	7.5987	6.8398	10.3954	12.4731	10.4773	12.3146	11.3604	13.8759	12.4927	11.5987	10.8914	9.7664	11.0654	12.8245	11.3704	13.2654	12.7414	8.6165	9.1805	15.4616	9.3564	10.7286	7.3549	7.57	7.6116	8.9983	9.2565	6.8876	7.2612	7.2023	7.0944	7.1531	17.7145	15.8419	21.641	14.2842
464	6.6769	6.7103	6.4806	7.0335	6.5429	10.8597	7.2765	6.9737	6.9338	6.903	7.3672	7.0529	7.05	7.6382	6.8675	10.4667	12.5352	10.506	12.3546	11.4138	13.9513	12.5398	11.6677	10.9138	9.8068	11.1099	12.9211	11.4197	13.3767	12.8242	8.6662	9.2293	15.5207	9.4076	10.7834	7.3869	7.5785	7.6374	9.062	9.3101	6.8905	7.2886	7.2499	7.1043	7.1931	17.8075	15.907	21.7482	14.3539
465	6.6924	6.7177	6.5017	7.0468	6.5575	10.8762	7.2703	6.9778	6.937	6.9105	7.3751	7.0501	7.0434	7.6436	6.8827	10.5062	12.5961	10.5266	12.3846	11.4739	13.9958	12.5529	11.6769	10.9552	9.848	11.1554	12.9563	11.4401	13.4247	12.91	8.6709	9.2366	15.561	9.4177	10.8334	7.3763	7.5925	7.6494	9.0533	9.3583	6.8883	7.2756	7.2714	7.1085	7.2117	17.8058	15.9455	21.8481	14.3771
466	6.6861	6.707	6.4843	7.0392	6.5388	10.8555	7.2259	6.9662	6.9135	6.8782	7.3535	7.011	7.0119	7.5969	6.8604	10.5222	12.6475	10.5417	12.3844	11.47	14.0246	12.5479	11.6673	10.9887	9.862	11.1716	12.9396	11.4426	13.4055	12.9355	8.6563	9.192	15.5455	9.4102	10.8478	7.3379	7.5846	7.6271	9.0446	9.3556	6.8673	7.2518	7.2199	7.0661	7.1618	17.7795	15.9579	21.924	14.3945
467	6.6994	6.7298	6.4952	7.0738	6.5461	10.8626	7.2152	6.9711	6.9108	6.8758	7.3374	7.0111	6.9968	7.5933	6.8518	10.5695	12.6992	10.5932	12.3994	11.5137	14.098	12.6081	11.6783	10.9927	9.8597	11.2056	12.9896	11.4923	13.4337	12.9662	8.6711	9.1713	15.576	9.4452	10.8917	7.3583	7.5933	7.6435	9.0719	9.3785	6.8549	7.2356	7.1968	7.0501	7.1309	17.8442	16.0521	22.0469	14.4306
468	6.7396	6.7543	6.5318	7.0936	6.5796	10.8458	7.2585	6.9832	6.9238	6.9013	7.3463	7.0374	7.0046	7.6093	6.8646	10.6337	12.7614	10.6396	12.4466	11.5787	14.1691	12.644	11.731	11.0369	9.8688	11.2557	13.0535	11.5549	13.4811	13.0259	8.6894	9.2064	15.6209	9.4841	10.9477	7.3849	7.5985	7.6782	9.1353	9.4283	6.8796	7.2254	7.2119	7.0735	7.1411	17.9774	16.1174	22.1486	14.4997
469	6.7597	6.7763	6.5533	7.1135	6.6113	10.8779	7.3044	7.0056	6.9415	6.9076	7.3835	7.0686	7.0435	7.6353	6.8879	10.6811	12.8202	10.6723	12.4996	11.6476	14.2289	12.6842	11.7952	11.0891	9.8974	11.3187	13.1252	11.624	13.5375	13.1119	8.7297	9.2574	15.6649	9.5414	11.0154	7.3982	7.6295	7.7101	9.1754	9.4864	6.8933	7.2447	7.2554	7.0816	7.1565	18.0455	16.1862	22.2555	14.588
470	6.776	6.801	6.5768	7.1557	6.6408	10.9535	7.3276	7.0256	6.9649	6.9406	7.3995	7.0734	7.0916	7.6636	6.9129	10.7338	12.8805	10.7146	12.5672	11.7489	14.2771	12.7777	11.8599	11.1582	9.9572	11.4041	13.2055	11.7103	13.6201	13.2157	8.7678	9.3137	15.7085	9.5903	11.1081	7.456	7.6759	7.7426	9.219	9.5428	6.9079	7.2761	7.2947	7.1091	7.1721	18.1089	16.2458	22.3956	14.6437
471	6.8314	6.8491	6.6063	7.1818	6.6651	10.979	7.3486	7.0454	6.9855	6.9627	7.4293	7.0844	7.1194	7.6845	6.9416	10.7788	12.9568	10.7721	12.631	11.8178	14.326	12.8539	11.8943	11.1748	10.0207	11.4781	13.2718	11.7875	13.6856	13.3061	8.7886	9.335	15.7739	9.6317	11.1897	7.4759	7.695	7.7531	9.2812	9.6075	6.9112	7.3014	7.3014	7.1348	7.2036	18.1873	16.276	22.4918	14.6921
472	6.851	6.87	6.6188	7.1762	6.687	10.948	7.3605	7.0616	6.9818	6.9708	7.445	7.1116	7.1431	7.6985	6.9597	10.8072	13.0194	10.8007	12.6669	11.8619	14.3539	12.909	11.9093	11.201	10.0471	11.5211	13.2922	11.8515	13.7314	13.3255	8.7748	9.3414	15.8029	9.6818	11.2404	7.5055	7.697	7.774	9.3328	9.6569	6.9301	7.2977	7.3051	7.1431	7.2177	18.2817	16.3256	22.5508	14.7362
473	6.8485	6.8674	6.6166	7.1888	6.7116	10.926	7.3708	7.0659	6.971	6.9695	7.4618	7.1306	7.1434	7.7429	6.9691	10.8393	13.0908	10.8073	12.7182	11.8979	14.4	12.9511	11.9335	11.2302	10.0753	11.5821	13.3545	11.9006	13.8103	13.3867	8.7873	9.3431	15.8495	9.7275	11.3098	7.539	7.7386	7.8171	9.3829	9.6871	6.9519	7.3297	7.3157	7.1583	7.2357	18.3681	16.4096	22.6337	14.7663
474	6.8248	6.8637	6.6091	7.1988	6.7143	10.9297	7.3558	7.0614	6.9552	6.955	7.4248	7.1275	7.1383	7.751	6.9726	10.8606	13.1158	10.7992	12.7407	11.9087	14.4312	12.9853	11.955	11.2199	10.1011	11.6266	13.4322	11.9305	13.8653	13.4822	8.7878	9.3593	15.896	9.7468	11.3643	7.5245	7.7508	7.8428	9.4085	9.7091	6.9577	7.3235	7.3065	7.1603	7.2221	18.4227	16.4793	22.7015	14.7855
475	6.8093	6.8486	6.6009	7.197	6.7012	10.9426	7.367	7.0572	6.9709	6.9589	7.411	7.1153	7.1275	7.7406	6.9785	10.8748	13.1387	10.8206	12.7549	11.9193	14.4623	13.0226	11.9939	11.2146	10.1203	11.6666	13.489	11.9684	13.9142	13.5519	8.8098	9.3718	15.938	9.7646	11.4142	7.515	7.774	7.847	9.4412	9.7311	6.9512	7.3238	7.3064	7.1619	7.2303	18.4765	16.5235	22.7711	14.8165
476	6.8031	6.832	6.5748	7.1564	6.6602	10.9145	7.3529	7.0304	6.9602	6.9333	7.4003	7.1044	7.1243	7.7276	6.957	10.8793	13.152	10.8286	12.7671	11.9464	14.4892	13.0643	12.0147	11.2111	10.1244	11.7099	13.5365	12.0085	13.9327	13.5993	8.7869	9.3507	15.9442	9.7768	11.4534	7.5018	7.7631	7.8371	9.4601	9.7316	6.9302	7.299	7.2821	7.1463	7.1914	18.5433	16.5611	22.8184	14.8554
477	6.7775	6.8209	6.5506	7.1272	6.6266	10.8597	7.313	7.0029	6.9299	6.9022	7.4011	7.0673	7.0884	7.7131	6.9402	10.8679	13.1334	10.7947	12.7455	11.9378	14.4755	13.0438	12.0145	11.1979	10.1207	11.7167	13.5401	12.0202	13.9313	13.6252	8.7611	9.3225	15.9386	9.7855	11.4443	7.4923	7.7409	7.8353	9.4634	9.7465	6.9106	7.29	7.2578	7.1248	7.1663	18.5948	16.5941	22.8786	14.8527
478	6.7495	6.7993	6.5262	7.0994	6.6016	10.845	7.2676	6.9698	6.906	6.8763	7.3942	7.0369	7.0743	7.6783	6.9304	10.8817	13.1178	10.7669	12.7191	11.9242	14.4385	13.0274	11.9903	11.1974	10.0844	11.7339	13.5628	11.9935	13.95	13.6528	8.7491	9.3067	15.9289	9.793	11.4577	7.4823	7.7167	7.8415	9.4626	9.774	6.9012	7.2767	7.2559	7.1106	7.1608	18.6522	16.6056	22.8518	14.8594
479	6.7007	6.722	6.4637	7.025	6.5328	10.7986	7.1859	6.9025	6.8403	6.8237	7.3319	6.9914	7.0362	7.6101	6.8755	10.8435	13.0838	10.6973	12.6724	11.8773	14.3975	12.9594	11.9468	11.153	10.0285	11.6833	13.5484	11.9492	13.9194	13.6455	8.7073	9.2629	15.8676	9.7781	11.4433	7.4224	7.6601	7.7808	9.4391	9.7462	6.84	7.2235	7.2145	7.0498	7.1185	18.6547	16.5716	22.7792	14.8345
480	6.6292	6.6396	6.3992	6.9352	6.463	10.7285	7.1053	6.8144	6.7687	6.7523	7.2562	6.9278	6.9458	7.549	6.7965	10.777	13.0598	10.633	12.6016	11.8318	14.3535	12.8856	11.9148	11.0993	9.9625	11.5929	13.5046	11.8802	13.8605	13.6253	8.6191	9.2017	15.7948	9.7274	11.3973	7.3557	7.5808	7.7217	9.4034	9.6901	6.7473	7.1366	7.1226	6.9507	7.0377	18.5882	16.483	22.7069	14.7875
481	6.5936	6.6142	6.3697	6.893	6.443	10.6781	7.086	6.8017	6.7128	6.6973	7.197	6.8734	6.9053	7.5091	6.7534	10.7751	13.09	10.6232	12.5865	11.8388	14.3509	12.8736	11.9071	11.0777	9.9105	11.5988	13.52	11.8893	13.8477	13.6259	8.5791	9.1578	15.7701	9.7146	11.4166	7.3123	7.552	7.6869	9.3942	9.6667	6.7108	7.1012	7.0903	6.9008	6.9989	18.5737	16.463	22.7037	14.7837
482	6.5961	6.6117	6.3578	6.9226	6.4313	10.6552	7.1069	6.7958	6.704	6.715	7.2123	6.8649	6.9189	7.503	6.7592	10.8037	13.1261	10.6794	12.6291	11.888	14.3995	12.8716	11.9392	11.0985	9.9323	11.6621	13.533	11.9513	13.9045	13.6831	8.5647	9.1724	15.8177	9.7323	11.4549	7.3223	7.5758	7.69	9.4342	9.6659	6.7303	7.0945	7.0964	6.9209	6.9921	18.6162	16.4952	22.7699	14.8232
483	6.5528	6.5791	6.3322	6.9	6.3953	10.6301	7.0694	6.7536	6.6767	6.6904	7.1998	6.8534	6.8922	7.4533	6.729	10.7895	13.1115	10.6764	12.6321	11.8796	14.3808	12.862	11.9368	11.1006	9.94	11.6516	13.4914	11.9492	13.9062	13.6963	8.5344	9.1534	15.8622	9.7392	11.4648	7.3241	7.5611	7.6658	9.4163	9.6372	6.6876	7.062	7.0566	6.8965	6.9466	18.6596	16.5015	22.8039	14.8362
484	6.4957	6.5338	6.2854	6.8412	6.3437	10.5814	6.9964	6.7138	6.6231	6.6076	7.1489	6.809	6.8492	7.3982	6.6938	10.7591	13.0628	10.6315	12.5813	11.8746	14.3509	12.8421	11.9239	11.0583	9.91	11.594	13.4322	11.921	13.8881	13.6532	8.4951	9.1106	15.8501	9.7206	11.4737	7.2698	7.5237	7.6237	9.3751	9.6053	6.6315	7.0132	6.9967	6.8447	6.8861	18.6429	16.4886	22.8109	14.8445
485	6.4645	6.4755	6.2346	6.7954	6.3068	10.5224	6.9487	6.6753	6.5863	6.5738	7.0996	6.7652	6.8072	7.3587	6.6512	10.739	13.0392	10.5958	12.5393	11.8604	14.3282	12.8344	11.9001	11.0258	9.8857	11.5769	13.4227	11.9126	13.9046	13.6516	8.4657	9.0894	15.7998	9.71	11.4935	7.228	7.4766	7.6049	9.3432	9.5963	6.6002	6.9879	6.9641	6.8082	6.8662	18.6126	16.4683	22.8058	14.8093
486	6.437	6.4488	6.2071	6.775	6.2899	10.506	6.9353	6.665	6.5836	6.5756	7.0791	6.7539	6.7889	7.3481	6.6295	10.7275	13.0735	10.5928	12.5628	11.8654	14.3229	12.8053	11.8954	11.033	9.8772	11.6348	13.4314	11.9152	13.9368	13.688	8.4586	9.082	15.7854	9.7355	11.5169	7.2192	7.4596	7.6259	9.3726	9.6176	6.5766	6.9889	6.9564	6.8151	6.8416	18.6247	16.5031	22.7894	14.7967
487	6.4276	6.457	6.2084	6.7614	6.29	10.4797	6.9331	6.6504	6.5594	6.5672	7.0819	6.7362	6.7852	7.3669	6.65	10.7248	13.1072	10.6005	12.593	11.8917	14.3142	12.806	11.8869	11.0212	9.8755	11.6821	13.4336	11.932	13.9639	13.7363	8.4436	9.0809	15.7707	9.7728	11.5418	7.2234	7.4489	7.639	9.4228	9.6361	6.5749	6.9772	6.945	6.8078	6.8428	18.6628	16.5416	22.7743	14.8118
488	6.4226	6.4557	6.1969	6.7495	6.2982	10.46	6.917	6.6268	6.5717	6.5406	7.0678	6.7264	6.7853	7.3625	6.6413	10.7415	13.1242	10.5964	12.5903	11.8925	14.2852	12.8342	11.8909	11.0175	9.8905	11.7119	13.4272	11.9675	14.0008	13.7645	8.4462	9.0776	15.7647	9.8088	11.5811	7.2354	7.4673	7.649	9.444	9.6487	6.5679	6.9739	6.9515	6.8093	6.8399	18.6492	16.57	22.7656	14.8395
489	6.4232	6.447	6.1957	6.7347	6.3001	10.4575	6.9128	6.6274	6.5535	6.5338	7.0672	6.7143	6.7846	7.3522	6.6329	10.7699	13.1632	10.6038	12.5805	11.8965	14.2639	12.8514	11.8891	11.0132	9.8967	11.7306	13.4197	12.0184	14.0116	13.7873	8.4514	9.0927	15.741	9.8176	11.6517	7.2352	7.4728	7.6537	9.4654	9.6814	6.5636	6.9752	6.9472	6.7723	6.8111	18.6223	16.5595	22.7197	14.8734
490	6.3948	6.421	6.1552	6.7106	6.2503	10.4071	6.8852	6.5852	6.5204	6.5031	7.0388	6.687	6.7517	7.3259	6.589	10.7673	13.1463	10.5933	12.5471	11.8883	14.2501	12.8463	11.8643	10.9883	9.8424	11.7005	13.4124	12.0469	14.0306	13.7807	8.4102	9.055	15.7315	9.8069	11.6646	7.2099	7.4402	7.6219	9.4938	9.6641	6.5307	6.9438	6.8961	6.7355	6.7664	18.585	16.5136	22.704	14.8504
491	6.3437	6.3838	6.1259	6.6813	6.1845	10.3484	6.8498	6.5384	6.4728	6.4545	6.9977	6.6489	6.7132	7.2709	6.5634	10.7408	13.1415	10.5752	12.5201	11.8542	14.2032	12.8197	11.828	10.9285	9.8043	11.7001	13.3932	12.0038	14.015	13.7348	8.3665	8.9881	15.6935	9.785	11.6626	7.1703	7.3881	7.6003	9.4603	9.6515	6.49	6.8945	6.8416	6.6959	6.7289	18.4917	16.4604	22.6751	14.8381
492	6.3434	6.3757	6.1192	6.6701	6.1844	10.2649	6.8335	6.5173	6.4573	6.4336	6.9728	6.6233	6.6852	7.2395	6.5506	10.7479	13.1729	10.5577	12.5105	11.8313	14.2051	12.8108	11.7936	10.91	9.7814	11.7497	13.3792	11.9809	14.0349	13.7311	8.3475	8.9565	15.6541	9.778	11.6805	7.1434	7.385	7.6122	9.4447	9.649	6.4574	6.8666	6.8376	6.6696	6.7023	18.4536	16.4443	22.6551	14.8471
493	6.3432	6.3611	6.1125	6.6429	6.1796	10.2689	6.8036	6.5114	6.4419	6.4286	6.9888	6.6109	6.6745	7.2273	6.5495	10.7151	13.1749	10.5672	12.5128	11.8251	14.2049	12.8256	11.805	10.9161	9.7714	11.8107	13.4089	12.0029	14.0922	13.753	8.3417	8.9484	15.6418	9.8013	11.7219	7.1407	7.3911	7.6255	9.4675	9.6567	6.4456	6.8399	6.8457	6.6532	6.7036	18.4648	16.4536	22.7091	14.8802
494	6.3105	6.3237	6.0872	6.6305	6.1732	10.2606	6.7913	6.4988	6.4359	6.4046	6.9721	6.6093	6.6753	7.229	6.5403	10.7057	13.1709	10.5783	12.5125	11.8269	14.2057	12.8162	11.8363	10.9177	9.7776	11.8713	13.4607	12.035	14.1261	13.7981	8.3459	8.9489	15.6597	9.8295	11.789	7.1424	7.3742	7.6388	9.4849	9.6917	6.4606	6.829	6.8553	6.6482	6.7175	18.4669	16.4677	22.7645	14.9445
495	6.2639	6.2903	6.0637	6.5919	6.1501	10.2326	6.7654	6.4592	6.4114	6.3686	6.9253	6.5954	6.6547	7.2147	6.519	10.7228	13.1669	10.5665	12.4953	11.8171	14.1686	12.7503	11.8493	10.9289	9.7422	11.8838	13.525	12.0266	14.1464	13.8439	8.3196	8.9343	15.6669	9.8563	11.8099	7.1237	7.3585	7.6443	9.4973	9.7206	6.4581	6.8246	6.8375	6.6297	6.7094	18.425	16.4991	22.7977	14.9384
496	6.2668	6.2676	6.0636	6.5777	6.1508	10.2147	6.7508	6.4551	6.3975	6.388	6.8879	6.5926	6.6584	7.1929	6.4909	10.731	13.1841	10.5333	12.5112	11.8126	14.1375	12.6951	11.8236	10.947	9.7318	11.8598	13.565	12.0199	14.1606	13.8932	8.2838	8.8845	15.6525	9.9074	11.8452	7.1304	7.3533	7.6416	9.4969	9.7438	6.445	6.7962	6.7965	6.6079	6.6804	18.3625	16.5177	22.7917	14.9327
497	6.2587	6.2523	6.019	6.5716	6.1153	10.1782	6.7359	6.4308	6.355	6.355	6.8638	6.5667	6.6204	7.1426	6.4716	10.7122	13.197	10.5212	12.5013	11.807	14.13	12.6595	11.7973	10.9053	9.7119	11.8527	13.5771	11.9912	14.1436	13.9046	8.2367	8.831	15.5846	9.8955	11.8744	7.0999	7.3264	7.6135	9.5127	9.7297	6.4029	6.7719	6.7597	6.5801	6.6294	18.2604	16.4801	22.7108	14.904
498	6.1847	6.2102	5.9705	6.5335	6.052	10.1268	6.6896	6.3663	6.2997	6.2788	6.8212	6.5157	6.5528	7.083	6.4267	10.6562	13.1837	10.4824	12.4364	11.7735	14.0875	12.5867	11.7707	10.8467	9.6383	11.8117	13.5329	11.9896	14.1039	13.8621	8.1903	8.7662	15.5343	9.8649	11.8499	7.0438	7.2811	7.5605	9.4714	9.7071	6.3206	6.7088	6.7112	6.5375	6.5728	18.1444	16.4284	22.5622	14.8096
499	6.1289	6.1359	5.9236	6.4721	6.0143	10.0779	6.6311	6.3059	6.258	6.2252	6.7763	6.4733	6.4748	7.0533	6.3557	10.6094	13.1366	10.4335	12.3831	11.7731	14.0592	12.5125	11.733	10.778	9.5871	11.7494	13.4489	11.9671	14.0838	13.8305	8.1405	8.7058	15.4821	9.8566	11.8252	7.0113	7.2388	7.5283	9.4428	9.6553	6.2829	6.6579	6.6532	6.4913	6.4967	18.0903	16.3933	22.4641	14.7502
500	6.0991	6.1007	5.8998	6.4607	5.9699	10.0251	6.5729	6.2599	6.2288	6.1856	6.7326	6.4104	6.4391	7.0056	6.3153	10.5841	13.1006	10.3969	12.3533	11.7468	14.0074	12.472	11.7105	10.7447	9.5582	11.7004	13.4276	11.9266	14.0557	13.7996	8.0926	8.6793	15.4313	9.8443	11.8249	6.9769	7.2007	7.503	9.4376	9.6161	6.2553	6.6279	6.627	6.4504	6.4562	18.0231	16.359	22.4473	14.7155
501	6.1077	6.1083	5.8799	6.4244	5.9381	9.9985	6.5443	6.2542	6.1884	6.1561	6.7069	6.3703	6.4388	6.985	6.3002	10.5919	13.0933	10.4191	12.3235	11.7209	13.9746	12.4319	11.7115	10.7326	9.5265	11.7177	13.453	11.9137	14.0605	13.8192	8.0698	8.6444	15.3987	9.836	11.8771	6.9701	7.1969	7.4988	9.4507	9.6248	6.2195	6.6239	6.6287	6.4125	6.4412	17.971	16.3585	22.4304	14.7378
502	6.1022	6.1013	5.8687	6.3958	5.9398	9.9233	6.5193	6.2295	6.1623	6.1573	6.6875	6.3576	6.4309	6.9532	6.2962	10.5788	13.1199	10.4339	12.2751	11.7026	13.9616	12.4068	11.7228	10.7303	9.5033	11.7353	13.4808	11.9383	14.0674	13.8635	8.062	8.608	15.4119	9.8449	11.9392	6.9676	7.1858	7.4946	9.458	9.6301	6.1901	6.6124	6.6103	6.4039	6.4314	17.9133	16.3575	22.411	14.7442
503	6.0667	6.0614	5.8453	6.3592	5.9179	9.877	6.4843	6.1873	6.1347	6.1251	6.6464	6.3228	6.3726	6.8994	6.2601	10.5588	13.1089	10.4052	12.2144	11.6834	13.9187	12.3708	11.6821	10.7034	9.4777	11.7428	13.4524	11.9176	14.0073	13.8927	8.0458	8.5809	15.3702	9.8566	11.9439	6.9365	7.1378	7.4717	9.4497	9.6155	6.1718	6.5689	6.5483	6.372	6.4007	17.8554	16.3197	22.3813	14.6949
504	5.9993	6.0386	5.7983	6.3263	5.901	9.8211	6.4459	6.1533	6.0951	6.0823	6.5789	6.2739	6.3282	6.8464	6.2248	10.5472	13.0976	10.3836	12.1485	11.6379	13.8846	12.3497	11.637	10.6855	9.4589	11.7479	13.4083	11.9013	13.9746	13.8677	7.999	8.5561	15.2889	9.8285	11.9176	6.9028	7.099	7.438	9.4457	9.6081	6.1168	6.5091	6.5131	6.3238	6.35	17.8197	16.2464	22.3233	14.6214
505	5.9718	5.9966	5.7524	6.2887	5.8368	9.7592	6.3973	6.106	6.0607	6.0315	6.5477	6.2461	6.2911	6.8073	6.1736	10.5503	13.076	10.3735	12.1123	11.5782	13.8518	12.3308	11.5987	10.6682	9.4244	11.759	13.427	11.9041	13.9604	13.8588	7.9315	8.5249	15.2488	9.8339	11.915	6.8834	7.0601	7.4032	9.4487	9.5916	6.0789	6.4581	6.4778	6.2806	6.3003	17.7866	16.1929	22.2701	14.6065
506	5.956	5.9577	5.7401	6.2532	5.8026	9.722	6.379	6.0852	6.0428	6.0067	6.5473	6.221	6.2784	6.7848	6.1549	10.5612	13.0421	10.3696	12.0956	11.569	13.8425	12.3237	11.5874	10.6666	9.4147	11.7999	13.4729	11.9505	13.9796	13.8903	7.9088	8.5162	15.2417	9.8579	11.9825	6.8641	7.033	7.4138	9.4549	9.5914	6.0858	6.4608	6.4549	6.2634	6.2923	17.8239	16.1849	22.2373	14.6167
507	5.9413	5.925	5.7171	6.2289	5.789	9.7041	6.3617	6.0875	6.024	5.9811	6.5402	6.205	6.2728	6.7816	6.1528	10.5655	13.0459	10.3662	12.0805	11.548	13.8256	12.3092	11.5716	10.6579	9.404	11.8412	13.4812	11.9763	14.004	13.9455	7.9222	8.5115	15.2675	9.8743	12.044	6.8598	7.0157	7.4321	9.4456	9.6081	6.0796	6.4448	6.4429	6.2253	6.282	17.8417	16.1642	22.201	14.6206
508	5.9063	5.9048	5.7028	6.221	5.7796	9.6718	6.3458	6.0664	5.9787	5.9643	6.5157	6.1894	6.2382	6.7742	6.1353	10.5732	13.0506	10.3703	12.0928	11.5111	13.7937	12.297	11.5511	10.6511	9.4108	11.869	13.5264	11.9691	14.031	13.9547	7.9042	8.4857	15.2815	9.8781	12.077	6.864	7.0228	7.4469	9.4487	9.6396	6.0327	6.4278	6.4411	6.194	6.2495	17.8371	16.1442	22.1309	14.6235
509	5.9056	5.9111	5.6973	6.1984	5.7749	9.6518	6.3232	6.0609	5.9621	5.968	6.4846	6.1522	6.238	6.7582	6.1114	10.5926	13.1125	10.3752	12.1037	11.5369	13.8057	12.2765	11.5553	10.6782	9.4243	11.8727	13.5708	11.9681	14.0199	13.9668	7.8881	8.4558	15.2527	9.8944	12.1256	6.8641	7.0336	7.4489	9.4601	9.6835	5.9989	6.4023	6.43	6.2029	6.2296	17.8204	16.1433	22.057	14.6259
510	5.9276	5.915	5.6938	6.1961	5.7852	9.6432	6.3069	6.059	5.9728	5.9702	6.485	6.1462	6.2214	6.7458	6.0979	10.6354	13.1511	10.3988	12.1491	11.5565	13.8017	12.2554	11.6148	10.6664	9.4187	11.8871	13.6051	12.0162	14.0175	13.9807	7.8628	8.4268	15.1925	9.9214	12.2008	6.8436	7.0232	7.4636	9.4615	9.7125	5.9927	6.4013	6.4172	6.1804	6.2319	17.8136	16.1175	21.9885	14.6613
511	5.9011	5.8981	5.6855	6.2105	5.7548	9.6118	6.2904	6.0437	5.9573	5.9579	6.4709	6.1333	6.1761	6.711	6.0743	10.6421	13.1486	10.4116	12.1833	11.5715	13.7466	12.2109	11.6027	10.6533	9.4207	11.8857	13.6597	12.0594	14.0178	13.9685	7.8392	8.3986	15.163	9.937	12.2631	6.8158	6.9992	7.466	9.4536	9.7472	5.9716	6.3699	6.3884	6.1685	6.196	17.787	16.0942	21.9109	14.6649
512	5.8864	5.8739	5.6709	6.1968	5.7369	9.5962	6.2878	6.0146	5.9437	5.9627	6.4679	6.145	6.174	6.7031	6.0827	10.65	13.1448	10.4104	12.1702	11.585	13.7174	12.1686	11.5982	10.6423	9.4368	11.9216	13.7078	12.0933	14.0303	13.9798	7.839	8.4036	15.1404	9.9741	12.2959	6.8203	7.0012	7.4814	9.4459	9.7939	5.9677	6.3594	6.3767	6.1731	6.1788	17.8077	16.1089	21.9161	14.677
513	5.8304	5.8272	5.6238	6.1453	5.6915	9.5681	6.2622	5.9716	5.9009	5.9182	6.4497	6.1177	6.1444	6.6701	6.0632	10.613	13.1157	10.3913	12.1567	11.5676	13.7062	12.1175	11.567	10.6284	9.4366	11.9409	13.7857	12.1103	14.0442	14.0182	7.8367	8.3871	15.1515	9.9957	12.3423	6.8252	6.9932	7.4595	9.4921	9.8109	5.969	6.3527	6.357	6.1395	6.1725	17.8426	16.1185	21.9089	14.7095
514	5.7864	5.788	5.5777	6.0743	5.6476	9.4953	6.2121	5.9127	5.8571	5.8637	6.4003	6.0673	6.1125	6.6298	5.9989	10.5715	13.0756	10.3551	12.1249	11.5308	13.6878	12.0448	11.5531	10.5925	9.4027	11.931	13.8128	12.085	14.0504	14.0265	7.7955	8.3385	15.1598	10.0031	12.3613	6.7939	6.9686	7.4355	9.4965	9.7681	5.921	6.3248	6.3232	6.0944	6.1402	17.8638	16.1095	21.857	14.6525
515	5.7756	5.7824	5.5703	6.0587	5.6587	9.4594	6.1911	5.8982	5.8377	5.8284	6.3769	6.058	6.0934	6.6085	5.971	10.5694	13.0911	10.3487	12.1446	11.5667	13.6688	12.0301	11.557	10.5993	9.3935	11.9674	13.8599	12.107	14.0838	14.0414	7.7635	8.2919	15.1661	10.0088	12.391	6.785	6.9497	7.428	9.5114	9.7636	5.8972	6.2965	6.3142	6.0721	6.1237	17.8771	16.0935	21.8147	14.6358
516	5.8044	5.8071	5.594	6.098	5.7048	9.488	6.1983	5.9359	5.8727	5.856	6.4059	6.0813	6.1327	6.6226	6.0124	10.6257	13.1441	10.4135	12.1559	11.6265	13.6526	12.0321	11.6052	10.6434	9.448	12.0512	13.9406	12.1814	14.1656	14.1178	7.791	8.3123	15.2052	10.0665	12.4694	6.8047	6.9831	7.4516	9.5724	9.8242	5.9219	6.2994	6.3483	6.0887	6.1276	17.9237	16.1078	21.7931	14.6741
517	5.8548	5.8441	5.6339	6.1322	5.7358	9.5252	6.2194	5.9746	5.9137	5.9108	6.4466	6.1324	6.1715	6.6773	6.0542	10.6651	13.1956	10.4712	12.1731	11.6621	13.6821	12.0895	11.6849	10.6943	9.5188	12.1688	14.0378	12.297	14.263	14.1832	7.8252	8.3407	15.2456	10.1342	12.5786	6.8445	7.0322	7.4997	9.6362	9.8961	5.966	6.345	6.3843	6.1211	6.1532	18.0086	16.1388	21.812	14.7227
518	5.8671	5.8668	5.6512	6.154	5.7296	9.5341	6.2477	5.9681	5.9222	5.9276	6.4654	6.1557	6.1846	6.6948	6.0834	10.6845	13.2586	10.4996	12.1634	11.6498	13.7317	12.1245	11.7381	10.7309	9.5236	12.2677	14.1022	12.3644	14.3077	14.2505	7.8554	8.3721	15.2552	10.1906	12.6468	6.8788	7.0623	7.5446	9.6841	9.9728	5.9893	6.388	6.4253	6.1495	6.1839	18.0691	16.1598	21.8187	14.7849
519	5.8371	5.8215	5.5992	6.1019	5.68	9.4719	6.2055	5.9208	5.8786	5.875	6.402	6.1046	6.1361	6.6324	6.0574	10.6483	13.2283	10.4947	12.0949	11.6045	13.7264	12.0759	11.6953	10.6942	9.4549	12.2571	14.0744	12.3495	14.3105	14.2826	7.8339	8.3417	15.2574	10.1865	12.6504	6.8557	7.024	7.5268	9.6734	9.9782	5.9489	6.3567	6.4007	6.0981	6.1607	18.0309	16.123	21.7771	14.7874
520	5.7876	5.7659	5.5427	6.0502	5.6274	9.4085	6.1647	5.8795	5.82	5.8319	6.3475	6.0424	6.0744	6.586	6.0032	10.6141	13.1948	10.4767	12.0389	11.5384	13.7107	11.9917	11.6379	10.6527	9.3953	12.2221	14.0674	12.325	14.3042	14.271	7.7891	8.2881	15.2339	10.1562	12.6589	6.8265	6.9726	7.4811	9.6663	9.9447	5.8959	6.3103	6.3393	6.0577	6.1387	17.9905	16.0635	21.6894	14.7379
521	5.7764	5.7676	5.5528	6.0504	5.6211	9.3981	6.1464	5.8801	5.8307	5.827	6.3618	6.0478	6.0827	6.5854	6.0069	10.6274	13.2381	10.4919	12.0178	11.5231	13.7339	11.9751	11.6759	10.666	9.4026	12.2744	14.1055	12.3595	14.3618	14.328	7.798	8.2781	15.2727	10.202	12.7254	6.8398	7.001	7.5073	9.7075	9.9704	5.9075	6.3009	6.3403	6.0659	6.1403	17.996	16.0647	21.6986	14.751
522	5.7883	5.7617	5.555	6.0529	5.6299	9.3825	6.1562	5.892	5.8442	5.837	6.3697	6.0792	6.1051	6.6021	6.0058	10.6461	13.2889	10.5158	12.0272	11.5501	13.7423	11.9956	11.6946	10.6882	9.4231	12.332	14.1529	12.3974	14.4067	14.3976	7.8224	8.2915	15.3019	10.2716	12.7873	6.877	7.0154	7.5444	9.7611	10.005	5.9223	6.3104	6.3558	6.0704	6.1376	17.9651	16.0888	21.6986	14.7923
523	5.7927	5.7645	5.5531	6.0484	5.6317	9.3818	6.1795	5.9036	5.8571	5.8363	6.3776	6.0918	6.1121	6.6256	6.0114	10.6962	13.3251	10.5399	12.0644	11.5872	13.788	12.0317	11.7125	10.7179	9.4256	12.3851	14.2225	12.438	14.4492	14.4965	7.8435	8.308	15.3167	10.3141	12.8522	6.9196	7.0497	7.5843	9.8223	10.0374	5.9207	6.3383	6.3961	6.0846	6.13	17.955	16.0781	21.7424	14.8441
524	5.8083	5.7665	5.5665	6.0555	5.6285	9.3968	6.178	5.9069	5.8559	5.8521	6.3923	6.0915	6.1307	6.6256	6.0372	10.7296	13.3591	10.5675	12.0891	11.6263	13.8268	12.0567	11.7325	10.7594	9.4443	12.4659	14.2766	12.4763	14.4979	14.5707	7.861	8.3318	15.2967	10.3591	12.901	6.9388	7.0716	7.6323	9.8674	10.0686	5.9358	6.3582	6.4345	6.0937	6.1384	17.9731	16.0803	21.8169	14.8934
525	5.8094	5.7601	5.5737	6.055	5.6266	9.3695	6.1603	5.8987	5.8586	5.8547	6.3762	6.0876	6.1189	6.6349	6.0312	10.7215	13.3893	10.5635	12.1194	11.6364	13.8125	12.0567	11.7288	10.7876	9.4563	12.4999	14.303	12.4839	14.5091	14.5998	7.8617	8.3297	15.29	10.382	12.9314	6.947	7.0717	7.6346	9.8967	10.0639	5.9367	6.3549	6.427	6.093	6.133	17.9678	16.0893	21.8416	14.8865
526	5.7635	5.7275	5.548	6.0477	5.6003	9.3379	6.1305	5.8841	5.8302	5.8602	6.3593	6.0785	6.0933	6.6073	6.007	10.7173	13.4114	10.5681	12.1231	11.6675	13.7987	12.0128	11.7164	10.803	9.4776	12.5212	14.3182	12.4849	14.5085	14.5992	7.8261	8.3063	15.2823	10.3962	12.9681	6.9504	7.0811	7.6335	9.9165	10.0824	5.9167	6.3526	6.3966	6.0817	6.1294	17.9667	16.0773	21.8083	14.8874
527	5.7632	5.7623	5.5703	6.0813	5.6205	9.3457	6.1558	5.8953	5.8628	5.8785	6.3839	6.0831	6.1168	6.5985	6.0171	10.7421	13.4957	10.6297	12.1611	11.7217	13.8024	12.0149	11.7513	10.8465	9.512	12.5664	14.4011	12.5372	14.5657	14.6694	7.8416	8.3487	15.3381	10.4582	13.0447	6.9682	7.1047	7.6795	9.9535	10.1429	5.9375	6.3716	6.4286	6.1071	6.1699	18.0137	16.1349	21.8782	14.9647
528	5.8184	5.8087	5.624	6.0963	5.673	9.4152	6.2213	5.9272	5.9174	5.9083	6.4607	6.1469	6.1892	6.6443	6.0727	10.8212	13.578	10.6925	12.235	11.8116	13.8548	12.0623	11.8357	10.9224	9.5961	12.6671	14.5312	12.6315	14.6622	14.8	7.9052	8.4099	15.4212	10.5593	13.1408	7.0179	7.1717	7.7655	10.0165	10.2368	5.9996	6.4306	6.4979	6.1459	6.2437	18.0817	16.2228	21.9726	15.0713
529	5.8399	5.8028	5.6166	6.1104	5.6966	9.4375	6.2385	5.9596	5.9367	5.9354	6.4925	6.1807	6.2118	6.6852	6.0998	10.8547	13.6456	10.71	12.279	11.8598	13.9088	12.0954	11.8837	10.9614	9.6519	12.7628	14.6356	12.711	14.7249	14.8853	7.938	8.4211	15.4964	10.6162	13.2293	7.0567	7.2278	7.8018	10.0829	10.3185	6.0475	6.4547	6.5437	6.1984	6.2608	18.1116	16.2422	22.0521	15.1404
530	5.8428	5.8111	5.6152	6.1275	5.6966	9.4617	6.2289	5.976	5.9592	5.9595	6.497	6.1841	6.2172	6.6949	6.1076	10.8563	13.6762	10.7323	12.3223	11.8577	13.9278	12.1063	11.9244	10.9893	9.6808	12.8207	14.7079	12.7772	14.7842	14.9488	7.9376	8.4472	15.5287	10.6852	13.3249	7.0755	7.2632	7.8436	10.1434	10.3921	6.0636	6.4875	6.5582	6.2141	6.2834	18.1164	16.2595	22.1454	15.1714
531	5.8538	5.8402	5.634	6.1402	5.7173	9.4967	6.2428	5.9934	5.9782	5.9731	6.4876	6.1999	6.2272	6.687	6.1115	10.8583	13.7351	10.7953	12.3658	11.8756	13.9382	12.1464	11.9583	11.0418	9.6872	12.8913	14.8258	12.8404	14.8419	14.9832	7.9735	8.477	15.5288	10.7318	13.4016	7.096	7.2985	7.8819	10.1982	10.442	6.0591	6.5048	6.5741	6.2209	6.3077	18.1415	16.2567	22.2157	15.1717
532	5.9015	5.8705	5.6752	6.1545	5.7557	9.5487	6.3017	6.0362	6.0183	6.0059	6.5267	6.2583	6.2667	6.7296	6.1672	10.8966	13.834	10.8627	12.4564	11.9396	13.9921	12.1905	12.014	11.0875	9.7338	12.9871	14.984	12.943	14.9365	15.0697	8.0236	8.5123	15.5996	10.8022	13.5133	7.1702	7.3423	7.9409	10.2748	10.5258	6.1161	6.5441	6.6238	6.2495	6.344	18.1581	16.3076	22.2952	15.2109
533	5.9746	5.9109	5.7144	6.203	5.8119	9.5808	6.3525	6.1017	6.0726	6.0609	6.5804	6.3224	6.3097	6.7993	6.237	10.955	13.9261	10.9298	12.5538	12.0248	14.0451	12.2563	12.0827	11.1518	9.8187	13.0931	15.1282	13.0451	15.0613	15.1989	8.097	8.5648	15.6932	10.9047	13.6225	7.2556	7.4062	8.0346	10.3749	10.631	6.2006	6.6218	6.7336	6.3178	6.4093	18.226	16.3931	22.387	15.2964
534	6.0081	5.9558	5.7591	6.2493	5.8641	9.6249	6.401	6.1609	6.1183	6.124	6.6227	6.3628	6.3658	6.8625	6.2898	11.0203	13.9933	10.9987	12.6442	12.096	14.1261	12.3298	12.1794	11.22	9.8828	13.1795	15.2618	13.1812	15.1863	15.3508	8.1558	8.6119	15.7657	10.9925	13.7246	7.3156	7.4779	8.0997	10.4784	10.7281	6.2542	6.6674	6.8084	6.3882	6.4567	18.3273	16.4718	22.5092	15.4054
535	6.0028	5.9689	5.76	6.2662	5.8714	9.6433	6.4172	6.1698	6.1227	6.1164	6.6474	6.3865	6.3837	6.875	6.2978	11.0533	14.0346	11.0554	12.6335	12.123	14.2172	12.3744	12.2105	11.2672	9.9024	13.2347	15.3382	13.3135	15.2898	15.4513	8.16	8.6563	15.8115	11.0316	13.8347	7.344	7.5308	8.1282	10.5363	10.7613	6.265	6.6781	6.825	6.3999	6.4845	18.3889	16.5103	22.5981	15.4571
536	5.978	5.9521	5.7233	6.234	5.8388	9.6272	6.4287	6.1596	6.1198	6.094	6.6211	6.3716	6.3726	6.8587	6.2876	11.0218	14.0698	11.0704	12.5763	12.0935	14.2351	12.3865	12.2063	11.2821	9.888	13.2838	15.4259	13.3723	15.3662	15.5162	8.1502	8.6423	15.8461	11.0726	13.8987	7.3336	7.5441	8.1083	10.5591	10.7526	6.2517	6.6717	6.8189	6.378	6.4902	18.3564	16.4965	22.636	15.4919
537	6.0076	5.9637	5.7368	6.2431	5.8413	9.6485	6.4624	6.1659	6.1418	6.1371	6.6591	6.399	6.3854	6.8498	6.3109	11.0348	14.1059	11.084	12.6075	12.095	14.2565	12.4071	12.2247	11.3324	9.9225	13.3513	15.5153	13.4206	15.4304	15.5706	8.1765	8.6558	15.8871	11.104	13.9595	7.3829	7.5805	8.1302	10.5892	10.798	6.2758	6.6934	6.8596	6.4151	6.5228	18.3734	16.5204	22.654	15.4889
538	6.0403	6.0116	5.7899	6.2918	5.8763	9.7074	6.4988	6.2147	6.2032	6.2005	6.711	6.4411	6.4317	6.8977	6.3599	11.0971	14.2025	11.1598	12.6627	12.1534	14.3357	12.47	12.2906	11.4277	9.9592	13.4455	15.6364	13.5565	15.541	15.7008	8.2238	8.6782	15.9697	11.1745	14.0476	7.4256	7.6512	8.1914	10.6535	10.8704	6.328	6.7338	6.8941	6.4561	6.5803	18.4283	16.6289	22.7264	15.5213
539	6.0817	6.0403	5.8637	6.304	5.9285	9.755	6.5244	6.2365	6.2295	6.2229	6.7329	6.4665	6.4723	6.9408	6.405	11.1555	14.2994	11.2556	12.663	12.1981	14.4331	12.5137	12.3766	11.4891	10.0024	13.5346	15.7075	13.6704	15.6228	15.7786	8.252	8.7254	16.02	11.2334	14.104	7.4722	7.6898	8.2438	10.7396	10.9361	6.3501	6.7603	6.9245	6.4781	6.6205	18.4444	16.7097	22.7514	15.5679
540	6.0846	6.0511	5.8724	6.312	5.9685	9.7856	6.5504	6.2457	6.2487	6.2415	6.7514	6.479	6.4962	6.9619	6.4308	11.1658	14.3645	11.2923	12.6616	12.2269	14.5079	12.5555	12.3957	11.5385	10.0243	13.6019	15.7398	13.6953	15.6506	15.8531	8.2946	8.7588	16.0877	11.269	14.1683	7.5008	7.7019	8.2775	10.7833	10.9666	6.3514	6.787	6.9562	6.5025	6.6378	18.4539	16.7287	22.7954	15.6113
541	6.1098	6.0706	5.8635	6.3435	5.9879	9.8183	6.607	6.2683	6.285	6.303	6.7772	6.5174	6.5279	6.9734	6.452	11.2319	14.4047	11.3148	12.6809	12.2738	14.5763	12.6094	12.4632	11.5792	10.0583	13.716	15.8163	13.7151	15.6842	15.9379	8.3473	8.7883	16.1457	11.3257	14.258	7.5533	7.743	8.3256	10.8316	11.0371	6.3844	6.8491	7.0083	6.5279	6.6536	18.4721	16.7594	22.8818	15.6328
542	6.1303	6.0973	5.9006	6.3564	5.9915	9.8522	6.6254	6.311	6.3125	6.3377	6.7949	6.5442	6.5626	6.9857	6.4679	11.2653	14.4605	11.355	12.6929	12.3236	14.6046	12.631	12.5253	11.6299	10.0984	13.825	15.8785	13.7378	15.7375	15.9741	8.3928	8.8281	16.1826	11.3842	14.3157	7.6066	7.7871	8.3771	10.9026	11.1205	6.4272	6.8949	7.0465	6.5458	6.6728	18.5067	16.7932	22.9633	15.6829
543	6.1724	6.129	5.9516	6.3863	6.0219	9.8907	6.6627	6.3799	6.3624	6.3769	6.8548	6.5942	6.606	7.0512	6.5133	11.3096	14.5802	11.3868	12.7205	12.3928	14.6727	12.6718	12.5685	11.6918	10.1728	13.9512	15.9557	13.8384	15.8435	16.0337	8.4304	8.8788	16.2779	11.4437	14.3882	7.6795	7.8605	8.4363	10.9862	11.19	6.4875	6.9337	7.0975	6.6012	6.7413	18.6029	16.8282	23.0546	15.7573
544	6.1972	6.1763	5.9961	6.448	6.0465	9.95	6.7092	6.4323	6.4084	6.4293	6.9152	6.6559	6.6407	7.094	6.5936	11.4081	14.7138	11.4606	12.7889	12.4874	14.765	12.7336	12.6484	11.7554	10.2422	14.0822	16.0338	13.9169	15.9311	16.1524	8.5141	8.9386	16.3625	11.5059	14.5004	7.7447	7.9434	8.4961	11.068	11.2861	6.5354	7.0083	7.1814	6.6671	6.816	18.7037	16.857	23.2029	15.8182
545	6.2407	6.2247	6.0288	6.512	6.0947	10.0341	6.7787	6.4826	6.4804	6.5042	6.9887	6.7063	6.704	7.1634	6.6379	11.4973	14.7812	11.5389	12.8938	12.5328	14.8398	12.7992	12.7115	11.8614	10.3153	14.1949	16.1136	13.9858	16.0262	16.272	8.6077	9.0451	16.4496	11.6053	14.591	7.8016	8.0317	8.5786	11.1818	11.3994	6.6032	7.0915	7.2885	6.7319	6.9118	18.7695	16.9213	23.3328	15.8812
546	6.2674	6.241	6.0353	6.5314	6.1192	10.0804	6.817	6.5017	6.5386	6.5179	7.0246	6.7351	6.7463	7.1975	6.6583	11.5192	14.8117	11.5401	12.9512	12.5543	14.8902	12.854	12.7414	11.9327	10.3592	14.282	16.1885	14.0284	16.1028	16.3213	8.6565	9.1049	16.5311	11.6743	14.662	7.8742	8.1031	8.6476	11.2253	11.4513	6.6565	7.1659	7.3437	6.7661	6.9445	18.8152	16.9976	23.3903	15.9258
547	6.2551	6.2223	6.0417	6.5525	6.1184	10.1025	6.7778	6.4963	6.5171	6.5216	7.006	6.7236	6.7487	7.1925	6.6515	11.5161	14.8375	11.5344	12.9594	12.5747	14.8922	12.8784	12.7393	11.9625	10.3632	14.311	16.2103	14.0688	16.162	16.3295	8.6296	9.1103	16.5858	11.6722	14.6842	7.8631	8.1247	8.6751	11.234	11.4683	6.6578	7.1433	7.342	6.7616	6.934	18.8475	17.0386	23.3599	15.9568
548	6.2768	6.2292	6.0564	6.5925	6.1393	10.1975	6.7935	6.5517	6.5208	6.5702	7.0455	6.7428	6.7589	7.2066	6.6796	11.5465	14.914	11.5764	13.0267	12.6374	14.9332	12.9283	12.7775	12.0124	10.4	14.3442	16.2793	14.1287	16.2615	16.3933	8.6545	9.1375	16.6502	11.6969	14.732	7.9036	8.1534	8.7099	11.2792	11.4896	6.6687	7.1491	7.3594	6.7828	6.9716	18.8891	17.0992	23.3488	16.0047
549	6.324	6.2783	6.0919	6.6347	6.1658	10.2709	6.8553	6.5982	6.5728	6.628	7.0865	6.8136	6.8158	7.258	6.7225	11.6017	14.9851	11.6397	13.1235	12.7072	15.0153	13.0068	12.8517	12.0779	10.4707	14.3873	16.3863	14.2267	16.3703	16.5093	8.7194	9.1927	16.7316	11.7605	14.7989	7.9628	8.202	8.7517	11.349	11.5586	6.7246	7.1966	7.4258	6.824	7.0144	18.9353	17.172	23.3678	16.0392
550	6.4029	6.3523	6.165	6.7023	6.2516	10.4082	6.9522	6.6737	6.6819	6.719	7.1568	6.9264	6.8939	7.3324	6.7864	11.7135	15.1029	11.7717	13.262	12.7932	15.1521	13.141	12.9362	12.1505	10.5694	14.5225	16.5805	14.3808	16.4912	16.663	8.8224	9.282	16.8295	11.8522	14.9362	8.084	8.3166	8.8561	11.4512	11.6835	6.801	7.2982	7.5325	6.9182	7.106	19.0159	17.231	23.4133	16.1199
551	6.4444	6.3993	6.1966	6.7368	6.2993	10.5187	7.0228	6.7586	6.763	6.7919	7.2048	6.976	6.9314	7.4248	6.8653	11.7875	15.1389	11.8609	13.3391	12.8285	15.2153	13.2387	13.0023	12.2358	10.6392	14.5827	16.71	14.4938	16.6006	16.7798	8.8968	9.3467	16.9044	11.9272	15.0386	8.1479	8.408	8.9193	11.5522	11.8	6.8685	7.3847	7.5996	7.0065	7.1946	19.0761	17.308	23.4442	16.1905
552	6.4925	6.451	6.2485	6.7878	6.3276	10.5853	7.0743	6.8387	6.8249	6.8482	7.2545	7.0329	6.9874	7.4952	6.9409	11.8321	15.215	11.9047	13.41	12.8873	15.2958	13.3117	13.064	12.3312	10.6905	14.6349	16.8373	14.5987	16.6967	16.9048	8.97	9.4055	17.0017	12.0367	15.1182	8.2154	8.5057	8.9942	11.6384	11.8984	6.9333	7.4622	7.6673	7.0732	7.2733	19.1338	17.4269	23.5218	16.2461
553	6.5217	6.4703	6.2765	6.7935	6.3551	10.6308	7.1175	6.8769	6.8603	6.8864	7.283	7.0546	7.0226	7.5321	6.9625	11.8709	15.3057	11.9527	13.463	12.9475	15.4016	13.3338	13.1121	12.3935	10.7212	14.6754	16.9682	14.6594	16.8073	17.0297	9.0134	9.456	17.1074	12.0923	15.1909	8.2581	8.5833	9.0525	11.7234	11.9581	6.9735	7.5081	7.7049	7.1123	7.3182	19.1515	17.5048	23.5401	16.2796
554	6.5529	6.4686	6.3018	6.8294	6.3976	10.7031	7.1675	6.9175	6.8907	6.9234	7.3076	7.0614	7.0517	7.5596	7.0114	11.9074	15.3703	12.0088	13.4995	12.9861	15.4886	13.3681	13.1605	12.4413	10.7731	14.722	17.0503	14.7276	16.9008	17.1185	9.071	9.4913	17.2046	12.1091	15.259	8.29	8.6276	9.0754	11.7509	12.0507	7.002	7.5417	7.7589	7.1512	7.3557	19.1489	17.565	23.5611	16.2929
555	6.5866	6.5089	6.3496	6.8737	6.4431	10.7729	7.2262	6.9605	6.9458	6.9847	7.3438	7.1044	7.0752	7.5883	7.0505	11.9744	15.425	12.0611	13.5506	13.0355	15.5686	13.4415	13.2484	12.5061	10.8635	14.7837	17.1492	14.8214	16.9662	17.2138	9.0998	9.5453	17.2593	12.1605	15.3416	8.343	8.6892	9.1052	11.8352	12.1491	7.0206	7.5778	7.8223	7.1939	7.3936	19.1707	17.5943	23.5707	16.3561
556	6.6349	6.5421	6.3734	6.9145	6.4713	10.8469	7.2694	6.9905	7.011	7.0376	7.3616	7.1424	7.112	7.6186	7.0813	12.0498	15.4906	12.1107	13.5957	13.0722	15.664	13.5002	13.3194	12.5761	10.927	14.8849	17.265	14.8736	16.9748	17.3222	9.1323	9.6041	17.2916	12.2145	15.3963	8.4153	8.7408	9.1326	11.9342	12.2049	7.0882	7.6026	7.8727	7.2096	7.4488	19.2139	17.641	23.6443	16.3833
557	6.6367	6.5493	6.3915	6.9251	6.4813	10.8905	7.2795	7.0029	7.0308	7.0505	7.3813	7.1472	7.1478	7.6255	7.0775	12.0869	15.5468	12.1168	13.5973	13.0594	15.7649	13.5345	13.3484	12.6275	10.9427	14.9366	17.3182	14.872	16.9953	17.4191	9.1766	9.6342	17.3428	12.2352	15.42	8.4409	8.761	9.1459	11.969	12.2148	7.1181	7.6279	7.8962	7.2003	7.4827	19.2434	17.6315	23.7187	16.3711
558	6.662	6.6046	6.4276	6.9655	6.5235	10.9305	7.321	7.0512	7.0871	7.1303	7.4472	7.1809	7.2022	7.6574	7.1285	12.1563	15.6171	12.1727	13.6046	13.101	15.8435	13.6058	13.4089	12.694	11.0054	15.0055	17.3977	14.8905	17.0545	17.5401	9.2305	9.6997	17.4455	12.2872	15.4766	8.5073	8.8332	9.1956	12.0112	12.2424	7.1708	7.675	7.9588	7.2515	7.5343	19.3098	17.6378	23.822	16.3965
559	6.7442	6.6885	6.49	7.0356	6.5766	11.0314	7.3883	7.1173	7.1997	7.2193	7.5296	7.2586	7.2656	7.7323	7.2238	12.2721	15.6899	12.2315	13.6544	13.1791	15.9413	13.6995	13.5128	12.7949	11.0951	15.1256	17.4824	14.9782	17.1745	17.6794	9.3085	9.7607	17.5909	12.3793	15.585	8.6064	8.937	9.299	12.0968	12.3298	7.2438	7.7786	8.0666	7.3728	7.5998	19.3908	17.6965	23.9417	16.4529
560	6.7945	6.7186	6.5454	7.089	6.6303	11.1441	7.4662	7.2206	7.2884	7.2869	7.5874	7.3523	7.3295	7.8338	7.3129	12.3892	15.7573	12.2604	13.7138	13.2541	16.0405	13.833	13.5828	12.887	11.1495	15.2539	17.5595	15.0879	17.2993	17.8077	9.3982	9.8141	17.6949	12.4794	15.6749	8.716	9.0344	9.3898	12.1569	12.4164	7.3153	7.872	8.1561	7.4417	7.6941	19.4627	17.7677	24.0094	16.5286
561	6.7926	6.7069	6.5639	7.0818	6.6269	11.2092	7.5145	7.251	7.3279	7.3152	7.5986	7.3898	7.3408	7.8621	7.3352	12.4349	15.7754	12.2668	13.7329	13.2605	16.1083	13.8759	13.5946	12.9312	11.1781	15.3102	17.6084	15.1195	17.3348	17.8815	9.4414	9.876	17.7696	12.509	15.7062	8.773	9.0816	9.4283	12.1942	12.4748	7.3397	7.9042	8.2025	7.4469	7.7361	19.5124	17.7966	24.0142	16.5627
562	6.7796	6.7349	6.5733	7.0913	6.63	11.2864	7.5476	7.2777	7.3604	7.3536	7.6106	7.4093	7.3722	7.9071	7.3568	12.4955	15.8134	12.3275	13.7675	13.2805	16.1364	13.9134	13.5914	12.9959	11.1903	15.3504	17.6196	15.1434	17.3644	17.9292	9.4613	9.8987	17.815	12.5104	15.7383	8.8212	9.1449	9.4504	12.2218	12.5431	7.3567	7.9195	8.2248	7.4533	7.787	19.5044	17.7919	24.0004	16.5553
563	6.8234	6.7834	6.6101	7.1339	6.671	11.368	7.6085	7.3148	7.4104	7.413	7.641	7.4476	7.4333	7.9436	7.3946	12.561	15.8873	12.3782	13.8216	13.331	16.138	13.9756	13.65	13.0679	11.2115	15.4006	17.638	15.1602	17.4344	17.9427	9.4941	9.9355	17.8671	12.5436	15.8122	8.8691	9.2219	9.5108	12.2934	12.5841	7.4038	7.9771	8.2888	7.5284	7.8437	19.504	17.839	24.0148	16.5927
564	6.8691	6.8088	6.6503	7.1693	6.717	11.4728	7.666	7.3873	7.4633	7.5053	7.6859	7.4921	7.5005	7.9901	7.4532	12.6404	15.9461	12.4347	13.8991	13.3954	16.1899	14.0734	13.7354	13.1311	11.2608	15.5057	17.6908	15.2259	17.5471	18.0131	9.5625	10.0184	17.9384	12.5975	15.8836	8.9528	9.3183	9.5852	12.3887	12.6346	7.4679	8.057	8.3764	7.6032	7.9201	19.5277	17.9256	24.056	16.6576
565	6.9206	6.8661	6.7039	7.2138	6.7535	11.5699	7.7231	7.4555	7.5404	7.5967	7.7421	7.5503	7.5581	8.044	7.5148	12.7109	16.0118	12.4898	13.987	13.4641	16.245	14.1516	13.8206	13.1984	11.3245	15.6287	17.7661	15.3297	17.6741	18.1331	9.6529	10.1055	18.0092	12.6957	15.9537	9.0623	9.4004	9.6568	12.4661	12.7171	7.5415	8.138	8.4671	7.6569	7.9925	19.6047	18.0343	24.1063	16.7274
566	6.9631	6.935	6.7619	7.2765	6.7868	11.6372	7.8036	7.5523	7.6109	7.6727	7.798	7.607	7.6121	8.11	7.5842	12.7651	16.115	12.5645	14.0759	13.5117	16.2639	14.2247	13.8926	13.2619	11.3803	15.7364	17.8304	15.4385	17.795	18.2187	9.7129	10.1696	18.0503	12.7617	16.0272	9.1461	9.4996	9.7402	12.5092	12.7831	7.6199	8.1931	8.5292	7.706	8.0518	19.6752	18.1235	24.1357	16.7728
567	6.9957	6.9692	6.8115	7.3364	6.8209	11.7187	7.8665	7.6302	7.7019	7.7549	7.8445	7.6864	7.6725	8.1669	7.6516	12.7875	16.1959	12.6055	14.1616	13.5516	16.3001	14.2771	13.9626	13.3338	11.4559	15.8442	17.9118	15.5384	17.8887	18.3208	9.7635	10.2221	18.1443	12.8376	16.0972	9.2199	9.5922	9.8262	12.566	12.855	7.6965	8.2547	8.6061	7.7735	8.144	19.702	18.2266	24.2023	16.8113
568	7.0293	6.9983	6.8601	7.3774	6.8723	11.817	7.9444	7.6801	7.7945	7.8425	7.9112	7.7534	7.7233	8.2229	7.7312	12.8077	16.2842	12.6786	14.2439	13.5984	16.3581	14.2883	14.0259	13.386	11.5009	15.9459	18.0029	15.6275	17.9573	18.4429	9.81	10.2846	18.296	12.9088	16.1749	9.2991	9.687	9.8954	12.6265	12.9454	7.7894	8.3575	8.6998	7.8724	8.2399	19.7596	18.3312	24.2603	16.8477
569	7.0737	7.0275	6.8927	7.3966	6.9056	11.9259	8.0348	7.742	7.8888	7.9237	7.9785	7.8208	7.7664	8.3123	7.7967	12.8266	16.3135	12.7358	14.3291	13.6157	16.3651	14.3268	14.0766	13.44	11.5552	16.0082	18.0634	15.7209	18.0512	18.5245	9.8746	10.3663	18.4162	12.9617	16.2252	9.388	9.7986	9.9297	12.7139	13.0327	7.8673	8.4381	8.7913	7.9477	8.3522	19.8197	18.372	24.3115	16.9049
570	7.1292	7.0495	6.9251	7.4166	6.9331	12.0365	8.0882	7.8247	7.9638	7.9987	8.0175	7.887	7.8302	8.369	7.856	12.8492	16.3813	12.7786	14.4313	13.658	16.3673	14.3968	14.1064	13.5048	11.6279	16.0426	18.1238	15.7932	18.1169	18.589	9.952	10.4549	18.4716	13.0343	16.3022	9.4892	9.8875	9.9824	12.7885	13.1031	7.9319	8.5011	8.8679	8.0277	8.435	19.8634	18.3824	24.3451	16.9298
571	7.1857	7.1067	6.977	7.4714	7.0029	12.1642	8.188	7.9342	8.06	8.0897	8.0914	7.9686	7.9262	8.444	7.9404	12.9077	16.4733	12.8396	14.515	13.7239	16.3792	14.473	14.1646	13.6111	11.7173	16.1029	18.2489	15.8801	18.1873	18.6958	10.0427	10.5409	18.5134	13.0933	16.3872	9.5984	10.0242	10.0814	12.8676	13.1786	8.0242	8.6023	8.9703	8.1304	8.549	19.9383	18.4231	24.4732	17.0056
572	7.242	7.1624	7.0453	7.5588	7.0589	12.3315	8.2977	8.0547	8.1847	8.2067	8.1727	8.057	8.03	8.5241	8.0313	12.9633	16.5784	12.9116	14.6017	13.8001	16.4273	14.5541	14.2364	13.7217	11.8025	16.2115	18.4041	16.0119	18.2919	18.8394	10.1543	10.6343	18.5542	13.1327	16.4498	9.6884	10.1734	10.1722	12.9706	13.278	8.1329	8.7076	9.1068	8.2332	8.6525	20.0478	18.4457	24.6267	17.0788
573	7.3291	7.249	7.1405	7.6554	7.1294	12.5231	8.4103	8.1713	8.3299	8.3788	8.2652	8.1545	8.1274	8.6032	8.1394	13.0451	16.6812	13.0006	14.6975	13.9133	16.5449	14.6773	14.3376	13.8416	11.9232	16.3211	18.5653	16.1436	18.416	18.9819	10.272	10.749	18.6369	13.2194	16.5226	9.8217	10.3215	10.2414	13.1035	13.3706	8.2437	8.8318	9.2351	8.3452	8.796	20.1488	18.4448	24.7595	17.1732
574	7.377	7.2972	7.1736	7.6912	7.1686	12.6279	8.4762	8.2326	8.4141	8.4664	8.3041	8.1999	8.2042	8.6416	8.1988	13.0878	16.7139	13.0513	14.7372	13.965	16.6072	14.7403	14.3872	13.8978	11.9913	16.3562	18.6536	16.2021	18.4705	19.0357	10.3282	10.8132	18.681	13.2663	16.5486	9.898	10.3936	10.2868	13.1721	13.4167	8.2983	8.9079	9.2978	8.4011	8.8756	20.1458	18.4295	24.8196	17.2067
575	7.443	7.3571	7.2252	7.7225	7.2247	12.7414	8.5544	8.3016	8.5305	8.586	8.3671	8.2642	8.2744	8.7003	8.2559	13.1755	16.7197	13.1036	14.7741	13.9911	16.7073	14.7988	14.4255	13.9835	12.0855	16.4166	18.7591	16.2452	18.5498	19.1669	10.4037	10.8646	18.7431	13.3259	16.6038	9.9696	10.5261	10.3484	13.2101	13.4413	8.4016	9.0064	9.3844	8.492	8.99	20.1824	18.4308	24.8529	17.2267
576	7.4967	7.4168	7.2895	7.7571	7.2667	12.9006	8.6646	8.4089	8.6377	8.7303	8.4531	8.3569	8.3375	8.7883	8.3289	13.2511	16.7521	13.1351	14.8058	14.0543	16.8113	14.8256	14.4708	14.0775	12.1575	16.4919	18.8358	16.2994	18.6281	19.2835	10.5025	10.9526	18.8402	13.3705	16.6433	10.0783	10.6577	10.4405	13.2631	13.4599	8.5131	9.1083	9.5107	8.6081	9.0944	20.2671	18.4672	24.9196	17.2536
577	7.5424	7.4877	7.3526	7.8394	7.3444	13.0691	8.7956	8.5479	8.7751	8.8745	8.5369	8.4736	8.4195	8.8967	8.4349	13.3483	16.8116	13.1888	14.8536	14.1432	16.9237	14.888	14.4815	14.1751	12.2121	16.5327	18.9505	16.32	18.7047	19.403	10.5744	11.0594	18.9388	13.4352	16.7049	10.2022	10.8122	10.5159	13.3023	13.5526	8.6166	9.2349	9.6563	8.7212	9.238	20.3043	18.5102	24.9654	17.2937
578	7.6052	7.517	7.3997	7.9122	7.3878	13.2278	8.8971	8.6852	8.8946	8.9953	8.5898	8.5533	8.5089	8.9972	8.5353	13.4201	16.8577	13.2359	14.9112	14.1876	16.9815	14.9952	14.525	14.2692	12.257	16.5821	19.0888	16.3693	18.8032	19.5189	10.657	11.1158	19.0132	13.5085	16.785	10.2826	10.9593	10.5674	13.3551	13.6487	8.71	9.3378	9.7601	8.8019	9.3665	20.3084	18.4853	24.9218	17.3084
579	7.6696	7.5296	7.4594	7.9685	7.4453	13.3786	9.0287	8.8082	9.0497	9.1334	8.6603	8.6225	8.5748	9.0952	8.6315	13.4907	16.9074	13.2862	14.9841	14.2378	17.0376	15.0877	14.6381	14.3607	12.3193	16.6783	19.2409	16.4525	18.9146	19.593	10.732	11.1882	19.0537	13.553	16.8611	10.3612	11.0709	10.6106	13.4395	13.7734	8.8187	9.453	9.8782	8.9191	9.4755	20.3714	18.5618	24.9071	17.3289
580	7.6652	7.5611	7.4962	7.9952	7.4714	13.5142	9.1201	8.9064	9.1912	9.2541	8.6971	8.6819	8.6698	9.1513	8.6994	13.525	16.9396	13.3156	14.9824	14.2607	17.0911	15.1723	14.7086	14.42	12.3558	16.7378	19.3563	16.5507	18.9629	19.6176	10.7627	11.2608	19.1131	13.5691	16.9016	10.4411	11.1897	10.63	13.4403	13.8739	8.873	9.5305	9.9593	9.0006	9.5727	20.4376	18.6356	24.8728	17.36
581	7.6985	7.6181	7.5342	8.0253	7.5029	13.677	9.247	9.017	9.3568	9.414	8.7852	8.8018	8.7446	9.2361	8.7986	13.5659	17.022	13.3887	14.9604	14.2711	17.1365	15.2273	14.7498	14.5023	12.3974	16.7828	19.4793	16.6108	19.0152	19.6169	10.8519	11.3296	19.1459	13.6004	16.9565	10.5169	11.3236	10.6995	13.5011	13.9762	8.9501	9.6038	10.0768	9.1104	9.7044	20.4406	18.6858	24.924	17.3976
582	7.719	7.6548	7.5488	8.0663	7.5315	13.8058	9.3646	9.1317	9.4874	9.5688	8.8644	8.8882	8.8034	9.2937	8.9008	13.5892	17.0994	13.4237	14.9441	14.2713	17.1966	15.2634	14.7906	14.5596	12.4317	16.8229	19.539	16.6629	19.0699	19.7181	10.937	11.4091	19.1747	13.6806	17.0263	10.6401	11.4542	10.7791	13.6036	14.0339	9.0413	9.7144	10.1736	9.2125	9.8427	20.4421	18.779	25.0176	17.437
583	7.7779	7.6665	7.605	8.1408	7.5974	13.9532	9.4763	9.2461	9.63	9.7215	8.9274	8.983	8.9022	9.395	8.9873	13.5807	17.1851	13.4483	14.9794	14.2869	17.2645	15.3065	14.8316	14.5944	12.4648	16.8537	19.5469	16.6468	19.0765	19.7946	11.011	11.4693	19.1732	13.7223	17.0364	10.7492	11.6042	10.8372	13.7108	14.1032	9.1192	9.8399	10.2772	9.3246	9.9405	20.4697	18.8301	25.0641	17.4701
584	7.8436	7.7585	7.6823	8.2013	7.6639	14.1296	9.6035	9.4104	9.786	9.906	8.9931	9.0838	9.0103	9.5013	9.0682	13.5838	17.2831	13.53	14.9911	14.2991	17.3073	15.4012	14.8701	14.6652	12.5057	16.9309	19.5502	16.6785	19.1155	19.8337	11.0845	11.5189	19.2294	13.7584	17.0578	10.8285	11.7699	10.8852	13.7998	14.1345	9.2433	9.9529	10.3747	9.4298	10.0865	20.4765	18.9099	25.0921	17.4668
585	7.9451	7.8791	7.8054	8.2758	7.7648	14.3785	9.7656	9.6129	10.0294	10.1457	9.1306	9.2185	9.1299	9.6206	9.2383	13.6251	17.4318	13.6114	15.0642	14.4089	17.4126	15.4968	14.9388	14.7794	12.5699	17.0951	19.6042	16.7871	19.1919	19.8877	11.2139	11.6406	19.3607	13.8305	17.1562	10.9607	11.9839	10.9684	13.8991	14.1905	9.3767	10.1132	10.5454	9.5587	10.24	20.5131	19.0423	25.2211	17.5508
586	8.0103	7.9149	7.8681	8.3339	7.8164	14.5349	9.8912	9.743	10.1917	10.3003	9.2307	9.3365	9.2319	9.7059	9.361	13.6419	17.517	13.6802	15.1069	14.4624	17.4444	15.5571	15.0057	14.837	12.6262	17.162	19.6322	16.8347	19.224	19.9315	11.277	11.7143	19.4266	13.9025	17.1967	11.0537	12.1151	11.0175	13.9301	14.2603	9.473	10.2235	10.6412	9.6638	10.365	20.5257	19.0918	25.3279	17.5969
587	8.0768	7.9619	7.9327	8.3893	7.8612	14.7235	10.0641	9.9062	10.426	10.5235	9.3758	9.482	9.372	9.7935	9.5145	13.6409	17.6354	13.7512	15.1727	14.5133	17.5004	15.6175	15.056	14.9055	12.6405	17.2468	19.7108	16.9048	19.2825	20.0286	11.3519	11.823	19.5158	13.9684	17.2946	11.1716	12.2569	11.0728	14.0163	14.3294	9.5897	10.3326	10.7459	9.7846	10.512	20.5944	19.1238	25.4404	17.6303
588	8.088	8.0068	7.9561	8.4097	7.9066	14.8703	10.1979	10.0226	10.6083	10.7005	9.458	9.5838	9.4556	9.8715	9.6227	13.5983	17.6648	13.7584	15.206	14.4994	17.5313	15.6181	15.0618	14.8722	12.6672	17.3103	19.7354	16.9415	19.2841	20.0409	11.3889	11.8651	19.5381	13.9535	17.3243	11.2588	12.3659	11.1037	14.0779	14.3692	9.6613	10.429	10.8148	9.9164	10.6317	20.6358	19.0887	25.5289	17.6389
589	8.1263	8.0528	8.0025	8.458	7.9396	15.1343	10.3843	10.183	10.8052	10.9414	9.5698	9.7283	9.5825	10.0138	9.7942	13.619	17.6719	13.7973	15.2408	14.5206	17.6167	15.6901	15.0701	14.9355	12.7386	17.4105	19.7466	17.0064	19.3216	20.1003	11.4795	11.9392	19.62	13.9746	17.3306	11.3369	12.5428	11.1878	14.1438	14.4212	9.7778	10.5384	10.9487	10.0649	10.7824	20.7286	19.0856	25.6524	17.6803
590	8.1892	8.0915	8.0644	8.5028	7.9635	15.3656	10.5872	10.3747	11.0407	11.1606	9.7138	9.8571	9.7448	10.1489	9.9535	13.587	17.6871	13.8473	15.3317	14.5453	17.6223	15.7791	15.0988	14.9683	12.8108	17.4929	19.7208	17.0559	19.3556	20.1302	11.566	11.9972	19.6471	14.043	17.3607	11.427	12.7272	11.2332	14.1853	14.4724	9.867	10.6418	11.0647	10.2066	10.957	20.7803	19.0538	25.718	17.6593
591	8.2691	8.1596	8.1708	8.5993	8.0504	15.5786	10.7902	10.5975	11.2891	11.4646	9.8343	10.0652	9.8741	10.3238	10.1195	13.644	17.7217	13.8902	15.4184	14.5636	17.6243	15.8312	15.1505	15.0367	12.8514	17.5621	19.7769	17.1395	19.4578	20.2032	11.6461	12.0523	19.6094	14.0745	17.4323	11.5628	12.9183	11.2732	14.2501	14.55	10.0178	10.7764	11.23	10.3319	11.1168	20.813	19.0321	25.7703	17.7071
592	8.3851	8.2631	8.331	8.7053	8.1798	15.8187	10.9896	10.8335	11.6085	11.7636	10.0142	10.2598	10.0606	10.4999	10.2969	13.737	17.7531	13.9366	15.523	14.6378	17.6601	15.8601	15.223	15.107	12.8792	17.6677	19.8443	17.2282	19.5445	20.291	11.7746	12.1674	19.6589	14.1557	17.4998	11.7127	13.1027	11.3663	14.3539	14.6581	10.1881	10.9331	11.389	10.4843	11.2721	20.8636	19.0568	25.8159	17.7565
593	8.5101	8.4011	8.4633	8.822	8.2834	16.1152	11.2505	11.0993	11.9486	12.099	10.243	10.4656	10.2747	10.6806	10.5199	13.868	17.8165	14.0199	15.6261	14.7078	17.6889	15.9128	15.2965	15.2122	12.9619	17.7315	19.9171	17.3131	19.5792	20.3835	11.9038	12.2831	19.758	14.2468	17.6125	11.861	13.2535	11.4476	14.4212	14.6915	10.3245	11.1022	11.5563	10.6621	11.4811	20.9475	19.0933	25.8984	17.7775
594	8.6094	8.4685	8.5472	8.9294	8.3668	16.4126	11.5224	11.326	12.2495	12.4611	10.4564	10.633	10.4717	10.899	10.7742	13.9233	17.8828	14.0918	15.6281	14.7585	17.7867	15.9542	15.3541	15.2761	13.0415	17.7864	19.9828	17.3686	19.6855	20.5011	11.9928	12.4255	19.8339	14.2652	17.705	11.9633	13.432	11.5237	14.4845	14.7394	10.4626	11.2624	11.7095	10.8089	11.6855	20.9495	19.147	25.9356	17.7835
595	8.6656	8.5162	8.5894	8.9925	8.4048	16.6574	11.7227	11.5261	12.5229	12.7558	10.5812	10.7795	10.6391	11.0709	10.9677	13.9279	17.8835	14.0678	15.6239	14.7559	17.8378	15.9556	15.3406	15.3026	13.0572	17.7864	20.0047	17.4142	19.7382	20.547	12.0951	12.5041	19.8911	14.2733	17.7156	12.0421	13.5873	11.5438	14.5212	14.788	10.5685	11.3859	11.8164	10.9196	11.8545	20.9254	19.1721	25.8899	17.8253
596	8.7492	8.6016	8.6736	9.0433	8.4783	16.8886	11.9426	11.7672	12.8221	13.0771	10.7535	10.9861	10.8343	11.2647	11.2146	13.9586	17.8717	14.0797	15.6608	14.7737	17.8136	15.9432	15.3657	15.3662	13.0555	17.7905	20.0205	17.4526	19.7849	20.6248	12.2062	12.5701	20.0205	14.3179	17.7362	12.1725	13.8206	11.6044	14.5622	14.8327	10.6996	11.5484	11.9362	11.0506	12.0376	20.9339	19.2694	25.875	17.8539
597	8.8525	8.7047	8.7708	9.1658	8.6081	17.1973	12.2595	12.0285	13.1397	13.4364	10.9954	11.2785	11.0826	11.5312	11.4982	14.0064	17.8619	14.1319	15.7127	14.8181	17.849	15.9953	15.3967	15.4256	13.085	17.7815	20.069	17.5362	19.8189	20.7569	12.282	12.6904	20.1506	14.3515	17.7949	12.2833	14.0306	11.6655	14.6354	14.9755	10.8389	11.722	12.1017	11.2408	12.2418	20.9677	19.3346	25.8531	17.8816
598	8.9323	8.7575	8.8772	9.2666	8.7028	17.4413	12.5552	12.306	13.4462	13.8136	11.2508	11.5192	11.2979	11.7575	11.7793	14.043	17.83	14.1579	15.7331	14.8132	17.8978	16.0928	15.4732	15.5005	13.1473	17.8054	20.0818	17.5882	19.8562	20.8739	12.3581	12.821	20.1816	14.3605	17.8264	12.3462	14.204	11.7056	14.6451	15.0848	10.9658	11.8654	12.2433	11.3905	12.402	21.0084	19.4009	25.7751	17.8938
599	9.0184	8.8072	8.9853	9.347	8.813	17.6367	12.7419	12.4896	13.7277	14.1015	11.4519	11.7063	11.461	11.9561	11.9978	14.0794	17.8701	14.2131	15.7253	14.8198	17.9359	16.139	15.5113	15.5484	13.2034	17.8293	20.0891	17.6263	19.8971	20.9158	12.4484	12.8705	20.2189	14.3873	17.8064	12.3879	14.3472	11.7749	14.6477	15.1088	11.1002	11.9883	12.3562	11.4751	12.5167	20.9956	19.4512	25.7279	17.9387
600	9.1381	8.9586	9.1319	9.5103	8.9497	17.9242	13.0384	12.7987	14.1606	14.5505	11.7445	11.9899	11.7139	12.2235	12.2841	14.1367	17.9711	14.2834	15.7639	14.862	18.0272	16.2156	15.5966	15.6649	13.2753	17.875	20.2557	17.6978	19.9607	21.0369	12.5952	12.9794	20.2956	14.4546	17.8766	12.5027	14.5349	11.8392	14.7112	15.1808	11.2582	12.1384	12.4801	11.6496	12.7164	20.9864	19.5652	25.7896	17.999
601	9.2345	9.0697	9.2307	9.6197	9.0746	18.1947	13.3455	13.0647	14.5539	14.9884	12.0053	12.2706	12.0193	12.5531	12.5758	14.2095	18.0072	14.3189	15.7771	14.8739	18.1044	16.2455	15.6357	15.7277	13.307	17.9313	20.3492	17.787	20.0076	21.0531	12.6511	13.0594	20.3172	14.4829	17.9147	12.6242	14.7378	11.8781	14.8332	15.2487	11.3844	12.3104	12.6259	11.8256	12.8654	20.9944	19.6298	25.7883	18.0552
602	9.3006	9.1214	9.3418	9.6988	9.1434	18.4646	13.6575	13.3509	14.9033	15.4252	12.2583	12.563	12.297	12.8497	12.8917	14.2518	17.9764	14.3482	15.7479	14.879	18.1927	16.2404	15.6724	15.7436	13.3546	17.9595	20.3995	17.8149	20.0254	21.096	12.7012	13.1258	20.3232	14.4849	17.9525	12.6936	14.9075	11.9304	14.9427	15.2686	11.5192	12.4474	12.747	11.9992	13.0222	20.9794	19.6736	25.7359	18.0644
603	9.3883	9.2305	9.4531	9.8061	9.2162	18.7636	13.9348	13.7042	15.3021	15.882	12.5704	12.8432	12.5413	13.114	13.2496	14.2598	18.0064	14.3791	15.73	14.8997	18.3172	16.2767	15.6787	15.801	13.4256	18.0412	20.4549	17.8278	20.0477	21.1439	12.8099	13.2208	20.394	14.4968	17.9873	12.7346	15.1071	11.9722	15.0276	15.3302	11.6238	12.5974	12.894	12.1637	13.2224	21.0268	19.7216	25.8165	18.0134
604	9.4164	9.267	9.5052	9.873	9.2777	19.0218	14.1751	13.9347	15.6696	16.2718	12.8373	13.1193	12.7842	13.3403	13.5231	14.2199	18.0287	14.3724	15.6929	14.8307	18.4045	16.3172	15.6543	15.7936	13.4731	18.0021	20.4778	17.7841	20.0295	21.151	12.8595	13.2568	20.4114	14.5001	17.975	12.7973	15.273	11.9334	14.9844	15.3017	11.6737	12.6669	12.9601	12.2318	13.3649	20.9989	19.6194	25.8234	17.9527
605	9.5025	9.3636	9.578	9.9822	9.3893	19.3	14.5097	14.1709	16.0404	16.6948	13.1795	13.4428	13.0759	13.6358	13.8508	14.2387	18.0914	14.3902	15.6345	14.8383	18.4492	16.3592	15.6621	15.769	13.4818	17.957	20.4892	17.7405	20.0536	21.1744	12.8833	13.2902	20.451	14.4884	17.9373	12.8332	15.4081	11.917	14.9449	15.2696	11.7506	12.755	13.0528	12.3621	13.5024	20.9915	19.5284	25.7804	17.8902
606	9.7149	9.5128	9.776	10.1401	9.5624	19.6279	14.8803	14.5042	16.4765	17.1681	13.5692	13.7874	13.4171	14.0182	14.2353	14.3161	18.2014	14.4966	15.6414	14.9522	18.519	16.4075	15.7207	15.7949	13.5469	18.0571	20.5815	17.8147	20.0985	21.2296	13.0183	13.3658	20.483	14.5034	17.9648	12.9092	15.5694	11.9861	14.9827	15.3232	11.9033	12.8979	13.2084	12.5357	13.7127	21.0969	19.5127	25.765	17.9343
607	9.9017	9.6907	10.0026	10.327	9.7177	19.9432	15.306	14.8751	16.9961	17.7019	13.9786	14.2276	13.8138	14.3969	14.64	14.4087	18.3036	14.5645	15.7355	15.0447	18.6211	16.5056	15.8358	15.9358	13.629	18.2372	20.7463	17.9092	20.1912	21.3284	13.1576	13.5045	20.5841	14.5694	18.0181	13.0745	15.7847	12.0992	15.0611	15.4276	12.0778	13.1054	13.372	12.7115	13.9337	21.2165	19.5292	25.8149	17.9972
608	10.0177	9.7999	10.1602	10.4437	9.8422	20.2376	15.6319	15.1676	17.3963	18.1392	14.3934	14.6397	14.165	14.7206	15.0103	14.4212	18.3099	14.6009	15.7311	15.028	18.7372	16.5558	15.8947	15.9925	13.6396	18.3377	20.8204	17.9575	20.2115	21.3916	13.2173	13.6104	20.5896	14.6126	18.023	13.1989	15.984	12.1504	15.0918	15.4756	12.2153	13.2709	13.4798	12.8822	14.1517	21.2881	19.5062	25.771	18.0243
609	10.1062	9.9033	10.2882	10.5427	9.9395	20.4855	15.9672	15.492	17.7974	18.5777	14.8064	15.0165	14.5077	15.0637	15.4322	14.4417	18.348	14.6268	15.7212	15.0439	18.8258	16.5588	15.8744	16.0133	13.6718	18.4051	20.8187	18.0044	20.2756	21.4515	13.2901	13.7075	20.5734	14.6553	18.0759	13.2666	16.1291	12.1871	15.1896	15.4947	12.3544	13.4173	13.5734	13.0272	14.3317	21.3519	19.5221	25.7522	18.003
610	10.2102	10.012	10.3647	10.6997	10.0772	20.7351	16.2641	15.81	18.2445	19.0671	15.2843	15.3868	14.8939	15.4646	15.8639	14.471	18.3795	14.6501	15.713	15.0854	18.9058	16.5942	15.856	16.0541	13.7404	18.4138	20.8455	18.0803	20.341	21.5563	13.4342	13.7823	20.6089	14.6988	18.1245	13.3713	16.3216	12.2493	15.3004	15.5831	12.5016	13.5404	13.7206	13.1664	14.468	21.4031	19.5666	25.8393	18.0209
611	10.3259	10.0632	10.4498	10.8341	10.1718	20.9467	16.5685	16.0812	18.6393	19.5658	15.6926	15.7789	15.222	15.8467	16.2215	14.4507	18.4047	14.6511	15.7322	15.0663	18.8979	16.5762	15.8758	16.0918	13.7171	18.4747	20.855	18.062	20.3612	21.5891	13.4971	13.8074	20.5817	14.7204	18.1589	13.4422	16.4275	12.2965	15.346	15.6498	12.5854	13.644	13.8157	13.2659	14.6019	21.37	19.6055	25.8513	18.0369
612	10.4169	10.1413	10.5888	10.9273	10.2854	21.1739	16.885	16.3939	19.0202	20.001	16.096	16.2056	15.5448	16.1923	16.6077	14.435	18.3465	14.6449	15.765	15.0361	18.9064	16.5606	15.9353	16.0925	13.7168	18.5366	20.8744	18.0819	20.3866	21.6306	13.5727	13.8347	20.5736	14.7306	18.1597	13.5157	16.5439	12.3205	15.3647	15.7074	12.6561	13.7484	13.9041	13.3623	14.7613	21.302	19.6108	25.7826	18.0286
613	10.518	10.2262	10.7257	11.0632	10.3926	21.4244	17.154	16.6436	19.3516	20.3481	16.4593	16.5581	15.8532	16.4783	16.9342	14.4895	18.3895	14.7085	15.7989	15.0934	18.933	16.6211	15.9974	16.1263	13.7497	18.6189	20.919	18.1653	20.4714	21.6654	13.6432	13.8868	20.5971	14.7675	18.2049	13.6247	16.6821	12.3706	15.4414	15.7958	12.7592	13.8842	14.0049	13.4857	14.8851	21.3387	19.6603	25.7641	18.0847
614	10.6632	10.3668	10.8658	11.2171	10.5348	21.6972	17.4851	16.9264	19.7718	20.7743	16.926	16.9737	16.2173	16.8725	17.3753	14.5437	18.4213	14.8187	15.8476	15.1843	19.0016	16.668	16.0642	16.2047	13.8045	18.6826	20.9753	18.2783	20.5961	21.725	13.7821	13.9446	20.7143	14.8285	18.2423	13.7215	16.8657	12.4586	15.5437	15.8899	12.8915	14.0338	14.0886	13.6193	15.091	21.3947	19.7153	25.7334	18.2097
615	10.8024	10.5061	10.9728	11.3547	10.6339	21.9776	17.8082	17.2236	20.1725	21.2363	17.392	17.3623	16.6054	17.2731	17.8236	14.5583	18.4915	14.866	15.9204	15.2505	18.9992	16.7264	16.1054	16.2657	13.8569	18.7629	21.0473	18.3412	20.6479	21.7963	13.8927	14.0423	20.7947	14.8653	18.3204	13.7915	17.0651	12.4755	15.5708	15.9456	12.9703	14.1342	14.2009	13.7373	15.2863	21.4135	19.7653	25.7351	18.3079
616	10.9404	10.6186	11.098	11.48	10.7435	22.2322	18.1341	17.5146	20.5749	21.744	17.9352	17.7882	17.0191	17.672	18.2843	14.5737	18.5401	14.864	16.0257	15.2795	18.9865	16.8112	16.1496	16.3436	13.8796	18.8718	21.0757	18.3685	20.6936	21.8459	14.0207	14.1783	20.9108	14.925	18.427	13.903	17.2443	12.4831	15.5906	16.0001	13.1055	14.2771	14.3343	13.8898	15.4088	21.473	19.8315	25.7901	18.3328
617	11.0604	10.717	11.2499	11.5795	10.864	22.4208	18.4328	17.8114	20.9269	22.1787	18.414	18.2203	17.3552	18.0278	18.6961	14.6081	18.5314	14.8411	16.0901	15.3237	18.9675	16.8474	16.2181	16.4215	13.9255	18.9205	21.0776	18.4603	20.7191	21.8668	14.0982	14.2354	21.0207	14.975	18.4464	14.0166	17.3754	12.5506	15.6179	16.0636	13.2046	14.3937	14.4729	14.0321	15.5105	21.485	19.8484	25.7462	18.3614
618	11.1753	10.869	11.4261	11.7405	11.0246	22.7445	18.7542	18.1469	21.3517	22.6316	18.9151	18.6635	17.7572	18.4441	19.1424	14.6723	18.5902	14.9292	16.2047	15.3823	18.9769	16.9236	16.3292	16.5293	13.9982	18.9773	21.1648	18.5964	20.8015	22.0064	14.1645	14.2886	21.0955	15.0164	18.4642	14.1507	17.5544	12.6234	15.6348	16.1547	13.3161	14.5547	14.6236	14.1399	15.6644	21.5706	19.8832	25.7569	18.4394
619	11.2932	10.9774	11.5814	11.8953	11.1789	23.0378	19.1026	18.4338	21.7154	23.0853	19.4364	19.0946	18.2202	18.8859	19.616	14.7297	18.6651	15.0147	16.2965	15.4456	19.0246	17.0214	16.3913	16.6186	14.099	19.0665	21.2382	18.6772	20.9019	22.1234	14.2342	14.3745	21.0878	15.0958	18.5648	14.2558	17.731	12.6461	15.678	16.2364	13.4433	14.7115	14.7151	14.2617	15.8341	21.6537	19.955	25.8191	18.509
620	11.4215	11.0598	11.7221	11.9921	11.3115	23.2393	19.3888	18.6764	22.0667	23.5028	19.9079	19.5041	18.5633	19.2337	20.057	14.8013	18.7307	15.0598	16.3463	15.482	19.0561	17.0989	16.4673	16.7022	14.2141	19.062	21.2408	18.7486	20.9376	22.1551	14.2676	14.487	21.044	15.1542	18.621	14.2953	17.888	12.6511	15.7352	16.285	13.5597	14.8133	14.7668	14.4035	15.9877	21.6524	19.994	25.8247	18.5054
621	11.5934	11.1859	11.8584	12.1561	11.4154	23.4325	19.6954	18.9523	22.3943	23.9233	20.3813	19.9023	18.9235	19.6693	20.4875	14.9145	18.7939	15.149	16.3979	15.5447	19.1456	17.1644	16.5748	16.7823	14.3251	19.1464	21.3209	18.8342	21.0061	22.2262	14.3731	14.588	21.0563	15.2623	18.6983	14.3924	18.0596	12.735	15.8152	16.3848	13.6748	14.9147	14.9211	14.5384	16.1124	21.7361	20.008	25.8873	18.5704
622	11.7519	11.3619	12.0184	12.3468	11.5606	23.6963	20.0362	19.2547	22.7801	24.3528	20.9039	20.3568	19.373	20.0666	20.9611	15.0422	18.8745	15.211	16.5313	15.625	19.2903	17.2489	16.7039	16.9178	14.4668	19.2955	21.4424	18.9427	21.1033	22.3684	14.5788	14.7216	21.1237	15.3319	18.7965	14.5582	18.2832	12.8699	15.9998	16.4918	13.789	15.0715	15.088	14.7099	16.2489	21.8945	20.0957	26.1041	18.6807
623	11.8731	11.4789	12.1707	12.5194	11.6935	23.864	20.308	19.505	23.0922	24.7509	21.3574	20.8024	19.7512	20.4463	21.407	15.1378	18.9652	15.2579	16.6154	15.7417	19.3864	17.3066	16.7778	17.0214	14.6038	19.3755	21.5132	19.0086	21.1733	22.45	14.726	14.8437	21.1831	15.3807	18.9123	14.7134	18.4794	12.964	16.1158	16.5494	13.9115	15.1977	15.2391	14.8738	16.4	22.0169	20.1529	26.2007	18.7262
624	11.9716	11.5602	12.2832	12.6294	11.8016	23.9901	20.5266	19.698	23.4048	25.0453	21.8083	21.2393	20.0751	20.7857	21.7681	15.2589	19.0229	15.3355	16.6453	15.8038	19.5006	17.3676	16.8357	17.1195	14.661	19.4021	21.5838	19.0576	21.2893	22.5532	14.795	14.8967	21.2582	15.3943	18.9647	14.8509	18.6508	13.0316	16.1844	16.6311	14.0091	15.2936	15.3221	14.9763	16.4843	22.0707	20.2366	26.2983	18.8284
625	12.0941	11.6222	12.4098	12.7207	11.8703	24.1453	20.7432	19.8683	23.6961	25.3697	22.1747	21.5837	20.3899	21.1186	22.1154	15.3403	19.0701	15.3807	16.6715	15.8637	19.5974	17.4209	16.8699	17.2466	14.699	19.4278	21.695	19.116	21.3568	22.6674	14.8283	14.9461	21.4038	15.4132	19.0126	14.9671	18.7926	13.0661	16.2526	16.6965	14.0661	15.4005	15.3619	15.0658	16.6058	22.158	20.2222	26.3978	18.878
626	12.1813	11.7397	12.5494	12.8316	11.927	24.2702	20.9349	20.0311	23.9704	25.6466	22.5867	21.8425	20.7204	21.4111	22.4685	15.4318	19.1083	15.399	16.7248	15.9344	19.6803	17.4852	16.8767	17.3032	14.7876	19.4838	21.8319	19.1971	21.4173	22.6963	14.8913	15.001	21.5623	15.4379	19.0531	15.0632	18.9324	13.1446	16.3299	16.6871	14.1215	15.439	15.4381	15.1316	16.721	22.1736	20.1689	26.4973	18.9533
627	12.2623	11.8111	12.6341	12.8907	12.0502	24.3823	21.1249	20.1719	24.2353	25.9197	22.9231	22.0893	20.9597	21.6946	22.7307	15.4723	19.1517	15.4686	16.7374	15.9604	19.7695	17.5786	16.982	17.3671	14.8568	19.5737	21.9392	19.2899	21.4941	22.7511	14.9474	15.0753	21.7041	15.4995	19.1115	15.1332	19.0582	13.1715	16.3831	16.7396	14.1771	15.5063	15.4964	15.172	16.8125	22.1781	20.2242	26.5492	19.0267
628	12.3285	11.8745	12.7048	12.9464	12.1507	24.4924	21.3454	20.364	24.4865	26.215	23.2918	22.3954	21.2524	21.9829	23.0536	15.5751	19.1899	15.5613	16.7537	15.9998	19.8601	17.6646	17.0315	17.4203	14.8843	19.5962	22.0626	19.345	21.6305	22.752	14.9626	15.1214	21.804	15.5721	19.1537	15.1627	19.1858	13.2448	16.4056	16.7683	14.2201	15.5623	15.5184	15.2342	16.869	22.2375	20.2227	26.5782	19.0907
629	12.4106	11.9517	12.759	13.0515	12.2614	24.5547	21.5322	20.551	24.6907	26.4214	23.6484	22.6797	21.5148	22.2624	23.3953	15.6609	19.251	15.6315	16.7597	16.041	19.9637	17.7094	17.0821	17.4992	14.9032	19.6013	22.2016	19.3335	21.7172	22.837	14.9816	15.1681	21.8473	15.5744	19.1893	15.2501	19.3115	13.2822	16.4115	16.8192	14.2878	15.6382	15.5934	15.3042	16.9521	22.2899	20.2483	26.5937	19.1711
630	12.4534	11.9752	12.8441	13.114	12.282	24.6714	21.6635	20.7078	24.8536	26.6174	24.0348	23	21.8082	22.5543	23.7086	15.6858	19.2407	15.6031	16.7336	16.0466	19.9802	17.7379	17.1332	17.5574	14.9185	19.6488	22.3343	19.3736	21.859	22.9421	15.0368	15.2079	21.8804	15.6239	19.2596	15.3309	19.5089	13.3312	16.4305	16.8618	14.3223	15.6701	15.6445	15.3136	17.0427	22.3425	20.2963	26.5885	19.2157
631	12.4641	11.9663	12.8223	13.1312	12.2907	24.7651	21.7746	20.8189	25.023	26.8506	24.403	23.2991	22.0956	22.8384	23.9923	15.6253	19.2567	15.5939	16.6936	16.0592	20.0262	17.8024	17.198	17.617	14.9447	19.7001	22.4026	19.4031	21.9664	23.0818	15.0861	15.2067	21.9322	15.6557	19.2526	15.4158	19.6548	13.3681	16.4574	16.8712	14.3729	15.7262	15.6907	15.3617	17.105	22.3916	20.3206	26.5696	19.2048
632	12.6072	12.0297	12.8687	13.1864	12.3599	24.8923	21.9858	20.9596	25.2854	27.1194	24.7863	23.6411	22.3901	23.11	24.3067	15.6676	19.3539	15.7023	16.7503	16.1391	20.1457	17.9228	17.282	17.7096	15.0285	19.8262	22.5019	19.45	22.1289	23.3279	15.1622	15.2946	21.9936	15.7016	19.3359	15.5651	19.8181	13.4204	16.5574	16.9283	14.4625	15.84	15.804	15.4853	17.232	22.5255	20.423	26.6705	19.2877
633	12.6726	12.1424	13.0021	13.3019	12.4873	25.0063	22.1715	21.066	25.4865	27.3548	25.1627	23.921	22.5805	23.3585	24.6269	15.6511	19.4423	15.8383	16.7788	16.2017	20.2868	17.9875	17.3604	17.7849	15.0642	19.9288	22.588	19.5294	22.2741	23.4091	15.2415	15.3894	22.0636	15.787	19.4944	15.6917	20.0379	13.4581	16.6194	17.0044	14.5423	15.9435	15.8668	15.5687	17.3	22.5814	20.5331	26.7493	19.3141
634	12.7367	12.2705	13.1508	13.4686	12.6007	25.1823	22.3769	21.2022	25.7032	27.6134	25.5637	24.2424	22.8019	23.6429	24.9415	15.6631	19.5386	15.9622	16.8021	16.2731	20.4326	18.0733	17.4981	17.8733	15.131	20.0263	22.7012	19.6812	22.4176	23.4963	15.337	15.4571	22.1541	15.8754	19.609	15.7929	20.2362	13.5608	16.7291	17.0561	14.595	15.9964	15.9598	15.6466	17.4107	22.6695	20.6621	26.8344	19.3518
635	12.8746	12.3715	13.2519	13.6473	12.6574	25.3731	22.5373	21.3972	25.9658	27.8993	25.8889	24.5348	23.0913	23.916	25.2419	15.7031	19.6155	16.0449	16.885	16.3959	20.6533	18.2084	17.6786	18.035	15.2102	20.1516	22.8249	19.7855	22.591	23.653	15.4277	15.5533	22.2809	15.9797	19.7015	15.952	20.4561	13.5998	16.8633	17.0889	14.7061	16.0959	16.091	15.7573	17.562	22.7952	20.7409	26.9462	19.4515
636	12.9997	12.4707	13.3883	13.7694	12.8043	25.4531	22.6612	21.5626	26.1354	28.0712	26.1494	24.7603	23.2885	24.1512	25.4784	15.73	19.7422	16.1063	16.97	16.4915	20.8289	18.3033	17.7925	18.2153	15.3285	20.3116	22.8774	19.8216	22.6686	23.7864	15.4807	15.6424	22.3903	16.0618	19.7501	16.1175	20.6816	13.663	16.9908	17.1292	14.7675	16.1702	16.1301	15.864	17.6618	22.9426	20.8542	27.0337	19.5926
637	13.0748	12.5626	13.5374	13.8699	12.917	25.5318	22.7977	21.7215	26.297	28.247	26.4907	25.0359	23.4894	24.3928	25.702	15.7099	19.8671	16.1666	17.0733	16.5652	20.9619	18.4066	17.9117	18.3346	15.4639	20.4794	22.9874	19.9569	22.7457	23.9846	15.5736	15.7296	22.5011	16.1351	19.8583	16.2913	20.8446	13.7471	17.0896	17.2418	14.8716	16.2486	16.207	15.9642	17.7153	23.0378	21.0096	27.1359	19.664
638	13.1723	12.5787	13.621	13.9556	12.9242	25.6402	22.9193	21.7887	26.5276	28.4403	26.7636	25.3013	23.7211	24.6292	25.9304	15.7471	19.9838	16.1749	17.1786	16.6662	21.051	18.4809	18.0241	18.4061	15.5626	20.6037	23.1079	20.037	22.8722	24.1547	15.6479	15.7707	22.5574	16.2535	19.9793	16.395	20.9987	13.8546	17.1369	17.321	14.9725	16.3134	16.2935	16.0195	17.7988	23.1002	21.1269	27.2853	19.7188
639	13.2195	12.6306	13.6646	13.9578	12.9903	25.7303	23.0085	21.8717	26.6661	28.5951	26.9998	25.5081	23.925	24.8239	26.1112	15.7917	20.0272	16.2101	17.2648	16.6918	21.1125	18.5168	18.1559	18.5428	15.6876	20.7228	23.1423	20.0904	22.9556	24.311	15.6799	15.8125	22.5673	16.3208	20.0658	16.5127	21.1588	13.8795	17.1934	17.3697	15.0183	16.3356	16.3863	16.0708	17.8776	23.167	21.2085	27.4429	19.7691
640	13.2887	12.6984	13.7387	14.0492	13.079	25.8086	23.1176	22.0206	26.7995	28.7943	27.2697	25.7607	24.1498	24.9771	26.2886	15.8329	20.1433	16.2814	17.3483	16.7209	21.1456	18.6382	18.2293	18.6613	15.8446	20.7792	23.2203	20.2218	23.0647	24.4831	15.8056	15.8744	22.6225	16.3665	20.1262	16.668	21.4173	13.9269	17.2692	17.484	15.1374	16.4355	16.4657	16.1341	17.9705	23.2462	21.3127	27.5497	19.9237
641	13.3685	12.7526	13.7675	14.1183	13.1229	25.8564	23.2305	22.0265	26.8896	28.9735	27.5482	25.9433	24.3568	25.1357	26.4874	15.8747	20.2485	16.3406	17.4284	16.8044	21.1302	18.711	18.3181	18.757	15.9611	20.8401	23.2965	20.3222	23.1556	24.6204	15.8532	15.8883	22.642	16.3888	20.2092	16.7472	21.6135	14.0244	17.2758	17.6042	15.1988	16.4845	16.4963	16.1971	17.9867	23.3196	21.369	27.6582	20.0369
642	13.457	12.8436	13.8347	14.2111	13.2203	25.8931	23.3062	22.163	27.0401	29.1415	27.7132	26.1486	24.5191	25.3169	26.6589	15.942	20.355	16.4096	17.5554	16.9245	21.1627	18.7819	18.4281	18.8382	16.0245	20.9374	23.4331	20.4172	23.2215	24.6838	15.8815	15.9261	22.6684	16.4563	20.2415	16.8737	21.7577	14.0772	17.3074	17.7005	15.2501	16.5473	16.5585	16.2857	18.0936	23.4039	21.5037	27.838	20.16
643	13.5429	12.9563	13.9546	14.2688	13.3384	26.0133	23.4068	22.2917	27.1433	29.3434	27.9847	26.3309	24.6711	25.5246	26.8634	16.0774	20.4623	16.5289	17.6153	17.0154	21.2273	18.8826	18.6064	19.02	16.1622	21.0676	23.5244	20.5741	23.2663	24.7623	15.9782	16.0068	22.6964	16.5264	20.3764	17.0342	21.9648	14.1483	17.4259	17.7898	15.3242	16.61	16.65	16.3951	18.1748	23.4218	21.6557	28.0341	20.2414
644	13.6361	13.0651	14.0551	14.3792	13.4234	26.1552	23.5647	22.4491	27.2807	29.478	28.2164	26.5101	24.8429	25.7376	27.0801	16.2835	20.6504	16.6352	17.7927	17.1031	21.3489	18.9919	18.7835	19.208	16.3408	21.2028	23.6669	20.711	23.3962	24.8678	16.1087	16.1187	22.7119	16.6335	20.5384	17.263	22.2346	14.2597	17.4922	17.9049	15.3803	16.6514	16.7767	16.5055	18.2494	23.5159	21.6984	28.2095	20.4114
645	13.7095	13.1309	14.1551	14.4564	13.4885	26.2264	23.7218	22.5771	27.5001	29.654	28.5117	26.6694	25.0098	25.9457	27.2872	16.4195	20.7364	16.7477	17.9466	17.2163	21.4341	19.1695	18.8755	19.3931	16.4779	21.4016	23.793	20.8553	23.5288	25.0429	16.1926	16.2166	22.8158	16.7418	20.6778	17.4403	22.5085	14.3257	17.5642	18.1234	15.4657	16.7409	16.8009	16.5912	18.3656	23.6401	21.7608	28.4093	20.5612
646	13.7024	13.1331	14.1193	14.4645	13.4961	26.1872	23.6838	22.5343	27.5626	29.6623	28.6617	26.7519	25.0956	26.0019	27.398	16.4792	20.7843	16.7964	17.9427	17.2311	21.3596	19.204	18.9021	19.4681	16.5062	21.4712	23.7692	20.9414	23.5668	25.1009	16.1968	16.2155	22.807	16.7373	20.6571	17.551	22.6659	14.2878	17.5675	18.1586	15.5047	16.7862	16.7833	16.5787	18.2922	23.6252	21.7616	28.4596	20.5134
647	13.6897	13.1412	14.1226	14.508	13.4856	26.181	23.6905	22.5347	27.6193	29.7578	28.8	26.8944	25.2333	26.0789	27.5116	16.551	20.8433	16.814	17.9699	17.1987	21.3789	19.2629	18.9731	19.5247	16.5734	21.4284	23.8181	21.0533	23.6423	25.1392	16.2403	16.2072	22.8272	16.7643	20.6926	17.705	22.8542	14.2618	17.6054	18.1785	15.5193	16.8239	16.7946	16.5736	18.2746	23.6514	21.8396	28.5564	20.5034
648	13.6695	13.1146	14.1312	14.5235	13.523	26.156	23.7252	22.5902	27.6379	29.8627	28.895	27.0014	25.3288	26.1397	27.6412	16.6162	20.8485	16.8151	17.9306	17.245	21.4077	19.2857	19.0177	19.5858	16.5798	21.4139	23.8569	21.0949	23.7321	25.1473	16.2259	16.2183	22.8771	16.7528	20.733	17.7784	22.9537	14.3365	17.6174	18.1677	15.5089	16.7971	16.7893	16.5607	18.3035	23.654	21.8951	28.5144	20.4729
649	13.6559	13.0757	14.107	14.4535	13.5362	26.1373	23.7072	22.579	27.6179	29.854	28.9429	27.0859	25.3421	26.1405	27.6999	16.6741	20.7704	16.8575	17.8399	17.2533	21.3916	19.3188	19.0515	19.6517	16.5821	21.376	23.8275	21.1482	23.7767	25.1733	16.1559	16.1678	22.9258	16.6839	20.7364	17.8513	23.117	14.3111	17.5203	18.1726	15.4437	16.759	16.7551	16.5199	18.3003	23.6102	21.881	28.4771	20.4534
650	13.6226	13.035	14.0451	14.4386	13.5158	26.0852	23.6697	22.5492	27.6711	29.8361	29.0953	27.1611	25.4247	26.2689	27.7291	16.6532	20.769	16.8686	17.8259	17.204	21.4233	19.3983	19.1121	19.6901	16.6599	21.393	23.8909	21.2303	23.9132	25.198	16.138	16.1187	22.9261	16.7013	20.7381	17.9579	23.3157	14.3222	17.5064	18.1524	15.428	16.7558	16.7367	16.5358	18.2825	23.6711	21.8695	28.5111	20.514
651	13.677	13.0613	14.0841	14.4557	13.5442	26.0663	23.656	22.5761	27.7262	29.8394	29.2899	27.2581	25.555	26.3823	27.8123	16.7068	20.7821	16.9672	17.892	17.193	21.4914	19.4845	19.2193	19.8719	16.6816	21.4641	24.0304	21.3219	24.0936	25.3334	16.1673	16.1076	23.0116	16.706	20.803	18.0697	23.47	14.3535	17.4932	18.1588	15.4763	16.7265	16.7179	16.5614	18.3276	23.8348	21.9193	28.522	20.5527
652	13.805	13.1176	14.201	14.4893	13.6668	26.2067	23.7334	22.6497	27.8896	30.0382	29.5796	27.5094	25.7253	26.5651	28.0796	16.8277	20.8951	17.0879	17.9774	17.3731	21.6154	19.6065	19.4114	20.1	16.7849	21.6721	24.1748	21.4492	24.286	25.5211	16.3108	16.2985	23.2025	16.8097	21.0875	18.3164	23.7725	14.4334	17.663	18.3523	15.6058	16.8444	16.8767	16.6803	18.4464	24.074	22.0598	28.6804	20.7005
653	13.8566	13.206	14.2071	14.5157	13.6886	26.2473	23.7902	22.7159	27.9957	30.1426	29.7216	27.6385	25.8716	26.7308	28.2423	16.8491	20.9602	17.1492	17.9851	17.505	21.7246	19.6622	19.5277	20.2145	16.8985	21.7619	24.2559	21.6009	24.5127	25.6432	16.3797	16.4225	23.2705	16.8341	21.2334	18.5063	24.0606	14.5092	17.8132	18.4031	15.6954	16.9456	16.9327	16.7895	18.5346	24.2042	22.2281	28.7408	20.7723
654	13.874	13.2122	14.2787	14.5819	13.7524	26.2414	23.9198	22.7619	28.0315	30.2226	29.9121	27.7766	26.0273	26.7969	28.3385	16.8699	21.039	17.2088	17.9746	17.5548	21.8609	19.6725	19.5817	20.3324	16.9424	21.8425	24.3672	21.722	24.7528	25.7371	16.3841	16.4704	23.2836	16.8797	21.341	18.6547	24.2164	14.5737	17.8868	18.4134	15.7678	16.9526	16.9846	16.8573	18.5155	24.2375	22.3795	28.7108	20.7997
655	13.9302	13.2745	14.2978	14.6339	13.7689	26.2701	23.9987	22.8132	28.1274	30.3659	30.0496	27.9151	26.1048	26.8516	28.4536	16.8743	21.1832	17.3159	18.0198	17.6594	22.0556	19.7604	19.7108	20.51	17.0439	22.0116	24.5218	21.8029	24.8715	25.8207	16.4265	16.5063	23.3501	16.9867	21.5053	18.9198	24.4717	14.631	17.864	18.4902	15.7992	17.0513	17.0126	16.9177	18.5921	24.2992	22.5492	28.8218	20.9002
656	14.0077	13.3161	14.3349	14.6476	13.7819	26.3264	23.9729	22.8818	28.1543	30.4243	30.0949	27.9478	26.0339	26.9206	28.4954	16.8313	21.1893	17.4193	18.0569	17.7248	22.1786	19.8238	19.8106	20.5315	17.1102	22.115	24.52	21.8095	24.9566	25.9177	16.4534	16.5483	23.3829	16.9872	21.5391	19.0955	24.6633	14.7044	17.8707	18.5157	15.7633	17.0634	16.982	16.8961	18.5288	24.278	22.7131	28.87	20.9392
657	14.1456	13.4298	14.4948	14.7831	13.906	26.4432	24.041	23.0149	28.3441	30.5737	30.2677	28.0417	26.2101	27.1208	28.6991	16.8987	21.374	17.5722	18.257	17.9123	22.4526	20.0515	20.0063	20.6761	17.3065	22.2915	24.6673	22.0757	25.1729	26.1332	16.5533	16.6842	23.5373	17.0899	21.6597	19.3572	24.9081	14.7573	18.0219	18.6332	15.9114	17.1759	17.1524	17.0136	18.7213	24.3201	22.9202	29.0834	21.1137
658	14.2165	13.5799	14.6502	14.9814	14.0443	26.5457	24.17	23.0798	28.4964	30.7432	30.4886	28.2468	26.5017	27.1682	28.858	16.9975	21.5719	17.6886	18.3554	18.007	22.6869	20.2278	20.175	20.937	17.5347	22.4382	24.8624	22.2674	25.3499	26.3649	16.6706	16.789	23.7647	17.2282	21.8101	19.5729	25.2412	14.844	18.1761	18.6966	16.0668	17.2536	17.2991	17.1189	18.878	24.4749	23.0851	29.3585	21.3351
659	14.2699	13.6485	14.6862	15.0177	14.1454	26.6599	24.2083	23.1215	28.5317	30.8067	30.6117	28.3634	26.6037	27.2331	28.9636	16.9597	21.6295	17.7643	18.4008	18.0021	22.8721	20.307	20.3178	21.038	17.6646	22.5416	24.9298	22.3502	25.5186	26.5037	16.7528	16.8613	23.9127	17.383	21.9365	19.7105	25.4781	14.9617	18.2488	18.7605	16.0869	17.3255	17.3856	17.1733	18.955	24.5831	23.2164	29.5539	21.4409
660	14.303	13.6718	14.6564	15.0311	14.1918	26.6271	24.177	23.1907	28.5352	30.8011	30.745	28.4258	26.6152	27.2846	28.9951	16.9067	21.7145	17.8663	18.3691	18.1083	22.9414	20.2505	20.4014	21.1683	17.7075	22.6106	25.0158	22.3701	25.5301	26.5718	16.8149	16.9384	24.0206	17.3926	21.9373	19.8368	25.6128	14.9789	18.2485	18.7204	16.1147	17.3514	17.378	17.157	18.9497	24.5438	23.2937	29.6218	21.3873
661	14.2913	13.6864	14.6487	15.039	14.2329	26.5451	24.1657	23.1814	28.521	30.8257	30.8221	28.4834	26.6103	27.3661	29.0174	16.94	21.8019	17.8733	18.4194	18.1398	23.0304	20.2403	20.4371	21.2032	17.7949	22.7916	25.1311	22.3495	25.5848	26.606	16.7671	16.8963	24.0534	17.3978	22.0211	19.949	25.7699	15.0449	18.2859	18.6563	16.0967	17.3308	17.3458	17.1891	18.9346	24.5643	23.3126	29.7227	21.4536
662	14.3242	13.7404	14.6973	15.0724	14.2909	26.5535	24.2125	23.1665	28.571	30.8525	30.7923	28.568	26.7386	27.4022	29.0167	16.9776	21.9116	17.8597	18.4873	18.2112	23.1263	20.3803	20.5137	21.2929	17.9127	22.859	25.1889	22.3718	25.595	26.7034	16.754	16.88	24.0712	17.4013	22.0374	20.1664	26.0367	15.1012	18.3248	18.7136	16.1232	17.366	17.4146	17.3004	19.0069	24.5876	23.413	29.8683	21.5779
663	14.4059	13.7935	14.7782	15.0547	14.2942	26.6011	24.2081	23.1033	28.6832	30.856	31.0091	28.7116	26.8272	27.5274	29.1114	17.021	21.9475	17.8978	18.5052	18.2684	23.2515	20.4791	20.6317	21.3418	18.0261	22.9082	25.1945	22.4944	25.6782	26.9033	16.8776	16.9458	24.197	17.5098	22.2099	20.3895	26.328	15.1774	18.3283	18.7005	16.1751	17.3909	17.4565	17.3287	19.0666	24.6231	23.5344	30.0499	21.6198
664	14.5923	13.8736	14.9606	15.1918	14.4089	26.6985	24.355	23.2848	28.7848	31.0422	31.2531	28.9054	27.0312	27.718	29.299	17.2094	22.1397	18.0986	18.6483	18.4124	23.444	20.7093	20.852	21.5764	18.2452	23.0721	25.3505	22.6876	25.8505	27.1641	17.1078	17.1244	24.2942	17.6868	22.4897	20.6995	26.6478	15.3616	18.4221	18.8596	16.364	17.5397	17.5497	17.4728	19.2326	24.7848	23.7387	30.3026	21.8577
665	14.6607	13.9384	15.0514	15.3015	14.5462	26.7819	24.4716	23.3818	28.8865	31.1575	31.3393	29.0303	27.1067	27.8211	29.4819	17.3482	22.2318	18.1946	18.7116	18.4883	23.6443	20.845	21.0277	21.7656	18.3991	23.2579	25.5265	22.8671	25.9496	27.3458	17.2581	17.2379	24.2837	17.8073	22.6243	21.0053	26.9423	15.4645	18.505	18.885	16.5111	17.5864	17.6248	17.5615	19.3373	24.9509	23.8918	30.4278	21.9236
666	14.7488	14.0328	15.0389	15.3355	14.6223	26.8411	24.5399	23.4592	28.9571	31.2281	31.4661	29.0857	27.1367	27.9508	29.605	17.3882	22.3194	18.2255	18.7063	18.5224	23.7643	21.0085	21.1524	21.9483	18.4813	23.3759	25.6409	22.9256	26.0847	27.485	17.3698	17.337	24.2692	17.8172	22.7207	21.1718	27.2494	15.5122	18.4832	18.931	16.5578	17.6476	17.7049	17.6277	19.3467	25.0514	24.06	30.5136	21.9618
667	14.7876	14.0596	15.0093	15.3124	14.5848	26.7689	24.5085	23.3996	28.9547	31.1453	31.55	29.1176	27.2127	28.0015	29.6439	17.4623	22.4	18.2541	18.7149	18.4805	23.7632	21.1159	21.2116	22.1005	18.5543	23.3263	25.6387	22.9115	26.0609	27.5542	17.3205	17.3379	24.3145	17.7499	22.7547	21.3206	27.4255	15.5165	18.475	18.9865	16.5379	17.6494	17.6915	17.5413	19.4015	25.0337	24.0735	30.4793	22.0036
668	14.7959	14.0564	15.0301	15.367	14.5391	26.7057	24.4862	23.3169	28.9593	31.2013	31.6121	29.1184	27.2745	28.0674	29.6573	17.5946	22.4834	18.338	18.758	18.4793	23.7216	21.1381	21.2633	22.2285	18.5899	23.3367	25.6679	22.9954	26.0974	27.6506	17.2919	17.3217	24.2992	17.8433	22.7893	21.541	27.6438	15.5239	18.4566	18.9976	16.5009	17.6139	17.7131	17.4871	19.4024	25.1657	24.0412	30.5158	22.1484
669	14.8564	14.0517	15.0581	15.4102	14.5302	26.7768	24.4898	23.353	29.0505	31.3671	31.7067	29.182	27.3354	28.1429	29.7073	17.6927	22.5713	18.4581	18.8169	18.4729	23.7654	21.2076	21.3367	22.3807	18.7145	23.5046	25.7504	23.0857	26.0687	27.8126	17.2856	17.3467	24.371	17.8524	22.8636	21.6867	27.893	15.5774	18.5081	19.0105	16.4934	17.6091	17.7491	17.5385	19.4028	25.2556	24.1102	30.4662	22.1989
670	14.9057	14.1329	15.1642	15.5169	14.6672	26.8867	24.5571	23.4449	29.1391	31.5694	31.836	29.2461	27.3237	28.2073	29.8099	17.8028	22.6549	18.495	18.873	18.5779	23.9265	21.3843	21.4641	22.6138	18.9139	23.5881	25.8959	23.2722	26.1175	28.0307	17.3125	17.3565	24.4647	17.8687	23.0284	21.8348	28.1187	15.632	18.6177	19.0509	16.6053	17.6581	17.8281	17.6523	19.4668	25.4257	24.2941	30.5782	22.3213
671	14.9885	14.2284	15.2261	15.6437	14.7516	27.0434	24.5937	23.563	29.217	31.5522	31.9836	29.3997	27.3906	28.3013	29.8984	17.9307	22.7602	18.5993	18.8785	18.6844	24.0748	21.5229	21.5772	22.7643	19.0308	23.6908	26.0109	23.3634	26.2547	28.1864	17.4083	17.4315	24.6275	17.9296	23.186	22.1126	28.3191	15.6981	18.7454	19.1382	16.7195	17.7448	17.883	17.7465	19.5294	25.5309	24.4415	30.6831	22.5076
672	14.9711	14.296	15.2216	15.697	14.8178	27.0396	24.6352	23.6341	29.3037	31.4521	32.1357	29.554	27.4823	28.2992	30.0416	18.076	22.7836	18.6916	18.9261	18.7277	24.2012	21.6353	21.7199	22.933	19.183	23.7783	26.0794	23.4204	26.3331	28.2713	17.4894	17.4088	24.6933	18.0223	23.2525	22.4115	28.6009	15.7138	18.952	19.2401	16.752	17.8133	17.9241	17.8019	19.5981	25.7468	24.5645	30.7005	22.5818
673	14.9475	14.3196	15.2413	15.6681	14.8532	27.0353	24.5877	23.6339	29.3308	31.4807	32.2103	29.5766	27.6036	28.352	30.1037	18.2444	22.7719	18.7533	18.9613	18.73	24.244	21.6498	21.7984	23.1257	19.3026	23.9232	26.1217	23.4838	26.3165	28.3607	17.574	17.4667	24.7373	18.0821	23.3136	22.6563	28.8773	15.8274	18.9662	19.3254	16.7737	17.8388	17.9616	17.7735	19.6227	25.8574	24.7242	30.6859	22.651
674	15.0207	14.3335	15.3296	15.6886	14.8912	27.0305	24.6032	23.7094	29.4285	31.6062	32.2664	29.6923	27.6225	28.5127	30.2307	18.3769	22.9198	18.836	19.033	18.803	24.2794	21.6537	21.8422	23.2849	19.4466	23.9842	26.2618	23.5273	26.5368	28.445	17.6202	17.5333	24.8378	18.1558	23.5151	22.9113	29.1598	15.8872	18.9884	19.4252	16.7915	17.8546	17.9858	17.8697	19.7179	25.9751	24.9263	30.7707	22.7149
675	15.0451	14.3546	15.3339	15.7272	14.9278	27.0262	24.6461	23.6347	29.3496	31.5344	32.2921	29.6917	27.6423	28.578	30.2946	18.3032	23.0569	18.8854	19.0456	18.8617	24.3216	21.7396	21.8856	23.3513	19.4886	23.9617	26.3427	23.503	26.6616	28.5157	17.5893	17.5238	24.751	18.1543	23.6252	23.0794	29.3634	15.8712	18.9703	19.3614	16.7776	17.8244	18.0289	17.9784	19.6544	26.0836	24.9771	30.8665	22.6795
676	15.1302	14.3685	15.4067	15.7758	14.9957	27.0821	24.7359	23.672	29.3068	31.5735	32.4368	29.7216	27.7462	28.6403	30.3715	18.4156	23.1617	18.9919	19.0942	18.9894	24.517	21.9126	22.0464	23.5386	19.5213	24.035	26.4977	23.6172	26.7547	28.5893	17.6492	17.6434	24.7908	18.1888	23.7012	23.2281	29.6645	15.871	19.1089	19.3953	16.837	17.9065	18.0654	18.0163	19.667	26.2439	25.1162	30.9811	22.811
677	15.1947	14.3455	15.456	15.7991	14.9835	27.0468	24.7734	23.7066	29.2986	31.6189	32.5308	29.7373	27.8395	28.6225	30.4377	18.455	23.1513	19.0228	19.2132	19.0604	24.5148	22.0072	22.0673	23.592	19.6006	24.0919	26.5621	23.6374	26.8143	28.5865	17.6997	17.6352	24.7489	18.2761	23.7776	23.3537	29.8144	15.9032	19.0949	19.4722	16.9042	17.9164	18.0875	17.982	19.71	26.2639	25.193	31.0352	22.858
678	15.2725	14.3929	15.5108	15.8125	15.007	26.993	24.704	23.7436	29.2622	31.5514	32.5994	29.8358	27.8056	28.5972	30.4798	18.5265	23.2341	19.079	19.3041	19.0882	24.5596	22.0773	22.2386	23.6986	19.7649	24.139	26.5843	23.7354	26.8992	28.6694	17.7454	17.6243	24.7089	18.3445	23.8425	23.4865	29.9612	15.9219	19.0193	19.5108	16.9415	17.9197	18.0715	18.0215	19.7243	26.2608	25.3465	31.151	22.8646
679	15.1986	14.4065	15.5694	15.7985	14.969	26.9386	24.6998	23.655	29.2438	31.5409	32.5998	29.8805	27.828	28.6497	30.4496	18.4551	23.2682	19.1301	19.3932	19.0408	24.5648	22.0469	22.2491	23.6847	19.7641	24.1953	26.626	23.7986	27.0525	28.7399	17.7544	17.6146	24.7322	18.2784	23.9238	23.6406	30.1898	15.8348	18.9818	19.5182	16.9166	17.8351	18.1135	17.995	19.6332	26.3633	25.4424	31.2712	22.8358
680	15.2718	14.4295	15.5823	15.8982	15.098	27.0469	24.8146	23.6566	29.4166	31.6776	32.7127	29.9815	27.9322	28.7486	30.5423	18.491	23.4323	19.2864	19.4363	19.1657	24.7208	22.1347	22.3547	23.8651	19.8516	24.3535	26.7935	23.9134	27.3024	28.8038	17.8181	17.753	24.8532	18.3676	24.0922	23.889	30.5456	15.9224	19.0937	19.5813	16.9809	17.8334	18.2176	18.1257	19.6577	26.5119	25.5793	31.4791	22.9647
681	15.4031	14.604	15.6942	16.017	15.2415	27.1836	24.8634	23.7515	29.4861	31.811	32.8177	30.1304	28.0335	28.8923	30.7178	18.606	23.5708	19.47	19.5887	19.2673	24.8017	22.2676	22.5688	23.9864	20.105	24.6098	26.9694	24.062	27.4774	28.9698	17.9093	17.7677	24.9841	18.5504	24.2898	24.2266	30.8592	16.0945	19.2166	19.7815	17.0602	17.9872	18.1918	18.192	19.7788	26.7999	25.7582	31.6292	23.1614
682	15.4511	14.658	15.7646	16.1107	15.3369	27.3228	24.87	23.7841	29.4793	31.8927	32.8678	30.185	28.0603	28.9493	30.7686	18.6165	23.5957	19.5912	19.7304	19.3225	24.8696	22.3295	22.7226	24.1652	20.2679	24.6849	26.9996	24.2037	27.5379	29.0497	17.9719	17.8002	25.0246	18.6092	24.4219	24.5315	31.1024	16.1629	19.2754	19.8779	17.0941	18.0515	18.2714	18.2451	19.8542	26.9021	25.8835	31.8226	23.2629
683	15.6172	14.8286	15.879	16.2849	15.4717	27.5092	24.956	23.8698	29.5149	31.9956	32.9833	30.2705	28.2098	28.9796	30.8164	18.7305	23.7355	19.8176	19.9405	19.5077	24.9993	22.444	22.8862	24.4164	20.4495	24.8474	27.2019	24.3764	27.7382	29.269	18.0583	17.9214	25.221	18.6358	24.573	24.8073	31.3208	16.2823	19.3302	19.9585	17.2173	18.2064	18.3977	18.3509	19.9645	27.063	26.0004	32.047	23.4365
684	15.7249	14.9385	15.9731	16.4292	15.5567	27.5983	25.0424	23.9671	29.628	32.1224	33.0711	30.4265	28.3148	29.0658	30.8439	18.8049	23.8596	19.9545	20.0415	19.6763	25.0566	22.581	23.0123	24.5733	20.602	24.9841	27.3172	24.5146	27.9197	29.4706	18.1457	18.0867	25.4109	18.6749	24.6165	24.9607	31.6312	16.4002	19.3686	20.0953	17.3162	18.2873	18.4105	18.4185	20.0437	27.1984	26.1315	32.1237	23.645
685	15.7682	15.0532	16.1217	16.4744	15.6059	27.578	25.0271	24.0373	29.6176	32.0759	33.0952	30.3577	28.4006	29.143	30.9187	18.8267	23.9793	20.0514	20.0553	19.6572	25.1162	22.6971	23.0917	24.7202	20.7032	25.0068	27.3466	24.6506	28.0394	29.4934	18.146	18.1593	25.552	18.7166	24.7138	25.1484	31.8624	16.4809	19.3863	20.1665	17.3548	18.2965	18.4396	18.4169	20.1497	27.167	26.2728	32.1117	23.6613
686	15.7689	15.0819	16.1343	16.4917	15.6151	27.5312	24.936	23.9903	29.5786	32.0508	33.1396	30.3453	28.4364	29.1832	30.9792	18.7836	24.0634	19.9918	20.0037	19.6566	25.2092	22.7763	23.1883	24.7205	20.7858	25.028	27.381	24.6382	28.0635	29.5243	18.1752	18.219	25.6286	18.74	24.9023	25.3128	32.0553	16.5292	19.4563	20.2093	17.3496	18.2437	18.4767	18.3836	20.1023	27.233	26.3107	32.1426	23.6689
687	15.844	15.1092	16.1671	16.5378	15.6581	27.5497	24.9584	24.018	29.6838	32.1399	33.3471	30.5585	28.5048	29.3181	31.0749	18.8641	24.0746	19.9712	20.1173	19.8204	25.3489	22.9272	23.3217	24.8588	20.849	25.1552	27.4179	24.7302	28.163	29.6932	18.2152	18.338	25.7724	18.832	25.0996	25.5654	32.2718	16.6424	19.5963	20.3671	17.3819	18.3205	18.543	18.4226	20.0998	27.3604	26.3611	32.2292	23.7721
688	15.8728	15.1757	16.1806	16.6009	15.7263	27.5389	24.9139	24.0633	29.7874	32.1436	33.4605	30.5926	28.5868	29.4092	31.1536	18.9383	24.0705	20.054	20.1953	19.8978	25.4411	23.0658	23.4409	25.0555	20.9337	25.27	27.3858	24.8205	28.2015	29.7472	18.2781	18.4429	25.831	18.9551	25.1724	25.8121	32.4989	16.7598	19.6658	20.4325	17.4966	18.3294	18.6256	18.4675	20.1588	27.4557	26.4499	32.2857	23.8972
689	15.8329	15.1816	16.1198	16.504	15.7339	27.4819	24.9163	24.0138	29.6991	32.0696	33.3656	30.4935	28.635	29.3692	31.2167	18.9475	24.0869	20.1309	20.2155	19.8854	25.552	23.066	23.5363	25.1867	20.9696	25.294	27.4631	24.7749	28.1553	29.7939	18.3478	18.4621	25.7845	18.9266	25.2344	25.9642	32.7003	16.791	19.5937	20.4656	17.5031	18.3526	18.5693	18.5265	20.1669	27.6155	26.4633	32.2395	23.9051
690	15.9403	15.1187	16.1628	16.4388	15.6455	27.5089	24.9589	24.0012	29.6081	32.062	33.3464	30.5762	28.7032	29.3443	31.2628	18.9162	24.1223	20.2075	20.1665	19.9136	25.6296	23.0646	23.6343	25.2732	20.9593	25.3874	27.5923	24.7995	28.1989	29.932	18.4348	18.5199	25.8609	19.0011	25.3969	26.1068	32.8163	16.8404	19.5853	20.5582	17.5288	18.4476	18.6024	18.6645	20.1882	27.7388	26.4934	32.1423	23.987
691	16.0264	15.2225	16.2582	16.5571	15.6918	27.4945	24.9755	23.9795	29.6622	32.0144	33.3574	30.5542	28.6893	29.4333	31.2454	18.9874	24.3294	20.2732	20.1548	19.9506	25.7137	23.1596	23.7444	25.321	21.0477	25.4269	27.6613	24.8187	28.33	30.0371	18.4897	18.6212	25.9981	19.0643	25.4628	26.3529	32.996	16.927	19.6406	20.6293	17.6281	18.5047	18.7041	18.6591	20.2542	27.939	26.5451	32.1608	24.0575
692	16.1501	15.3749	16.346	16.6704	15.8766	27.5456	24.9986	24.0922	29.7802	32.1011	33.4371	30.6807	28.7402	29.5258	31.312	19.1197	24.458	20.3531	20.2256	20.0823	25.9326	23.304	23.9102	25.5607	21.2089	25.512	27.6774	24.8368	28.3758	30.1845	18.6073	18.6907	26.1148	19.177	25.5621	26.5201	33.2252	16.9753	19.7228	20.7923	17.7821	18.5952	18.7792	18.7554	20.4138	28.058	26.6542	32.3268	24.2664
693	16.1318	15.3751	16.3329	16.7415	15.9519	27.4251	24.9744	24.1298	29.7321	32.1006	33.4623	30.7133	28.8727	29.5936	31.3985	19.2247	24.4333	20.3355	20.301	20.2134	26.0987	23.3976	23.9743	25.695	21.2965	25.6248	27.7457	24.8844	28.4069	30.2023	18.6804	18.7435	26.1037	19.2244	25.6279	26.6723	33.4421	16.984	19.7368	20.8694	17.7918	18.572	18.8759	18.8573	20.4342	28.0989	26.7804	32.4847	24.3609
694	16.0661	15.3809	16.347	16.7494	15.8594	27.4148	24.985	24.0959	29.7228	32.0925	33.4754	30.7054	28.8348	29.5118	31.4409	19.2694	24.574	20.3896	20.2909	20.1899	26.2263	23.4058	24.0795	25.7687	21.3034	25.6737	27.7537	24.8766	28.4614	30.3373	18.7267	18.7905	26.2127	19.2335	25.6555	26.7982	33.5937	16.9751	19.7671	20.9288	17.7627	18.5173	18.8762	18.7955	20.3195	28.2444	26.7376	32.6028	24.3509
695	16.1525	15.3702	16.4472	16.7259	15.7678	27.3474	24.9666	24.1095	29.6622	32.0955	33.4836	30.6353	28.8041	29.3849	31.376	19.2927	24.6554	20.4301	20.279	20.0629	26.3607	23.4437	24.1571	25.8555	21.396	25.6669	27.6476	24.8497	28.4678	30.4599	18.6714	18.7881	26.3064	19.1744	25.6622	26.9282	33.6099	16.9364	19.7992	20.8052	17.7379	18.5043	18.8356	18.7185	20.3102	28.2571	26.8344	32.601	24.3826
696	16.1427	15.2813	16.4493	16.7538	15.7878	27.3035	24.9768	24.1225	29.6319	32.0944	33.5809	30.6235	28.8575	29.3902	31.3668	19.3181	24.6639	20.4028	20.3187	20.0238	26.571	23.4348	24.1739	25.9272	21.4992	25.6769	27.74	24.884	28.493	30.589	18.6235	18.7637	26.4711	19.2504	25.7348	27.1037	33.6866	16.9943	19.8584	20.7023	17.8244	18.5338	18.8875	18.8105	20.4035	28.2991	26.942	32.6303	24.387
697	16.0929	15.3457	16.3736	16.7348	15.8136	27.308	24.9655	24.038	29.6852	32.0157	33.6904	30.6336	28.8612	29.4733	31.4048	19.4253	24.6556	20.3426	20.4277	20.0756	26.6426	23.4725	24.2235	25.9924	21.602	25.8118	27.8797	24.9125	28.5523	30.6824	18.6706	18.748	26.5166	19.2965	25.8306	27.2446	33.8	17.0982	19.9283	20.7718	17.8775	18.626	18.9717	18.878	20.3687	28.332	27.0514	32.726	24.3666
698	16.1029	15.4163	16.4012	16.7233	15.7536	27.38	24.9901	24.0788	29.7498	32.1227	33.8081	30.7282	28.8962	29.5923	31.5127	19.5225	24.887	20.4654	20.5349	20.0511	26.6881	23.5667	24.2856	26.092	21.7539	25.9638	28.0228	24.9918	28.633	30.9092	18.7423	18.7594	26.5027	19.3516	25.9907	27.4648	34.0735	17.1756	20.07	20.9375	17.9347	18.6506	19.005	18.9503	20.4088	28.4609	27.1805	32.9606	24.4984
699	16.1591	15.4316	16.4518	16.7699	15.7878	27.5038	24.93	24.0606	29.7492	32.1319	33.8694	30.7374	28.9069	29.6589	31.4979	19.5587	24.9654	20.5365	20.5629	20.0514	26.74	23.7887	24.284	26.1457	21.856	26.0021	28.109	25.0935	28.7369	31.0018	18.7924	18.8194	26.5295	19.3974	26.0977	27.5838	34.1884	17.1738	20.1257	21.015	17.9147	18.6601	18.9415	18.9394	20.4448	28.5893	27.2328	33.0331	24.5924
700	16.1736	15.4284	16.5016	16.7836	15.8274	27.4749	24.9285	24.0041	29.6706	32.2246	33.8442	30.7411	28.9333	29.6568	31.5139	19.5635	24.9984	20.547	20.5861	20.0047	26.8057	23.8601	24.3834	26.2823	21.9399	25.9649	28.0816	25.148	28.7912	31.0529	18.7965	18.8376	26.5602	19.3761	26.0774	27.6503	34.2138	17.155	20.1715	20.9927	17.8935	18.7569	18.9452	18.909	20.4391	28.6099	27.2643	33.2446	24.6181
701	16.1258	15.435	16.4655	16.7777	15.8341	27.3904	24.8677	23.9337	29.5346	32.0219	33.7484	30.6216	28.9276	29.5774	31.5062	19.5587	24.911	20.575	20.4065	20.0067	26.7971	23.8084	24.3183	26.2968	21.9822	25.9886	28.0485	25.0508	28.6984	31.0316	18.7922	18.8326	26.5852	19.3658	26.0683	27.6504	34.2379	17.2385	20.1539	20.8504	17.9197	18.8417	19.0024	18.8603	20.4399	28.5031	27.3353	33.2383	24.5168
702	16.0893	15.4714	16.4818	16.823	15.8296	27.4035	24.8824	23.9824	29.5224	31.9915	33.7971	30.5789	28.8999	29.5651	31.5258	19.5219	25.0365	20.6746	20.4788	20.0939	26.8848	23.822	24.3396	26.3012	21.9985	26.1475	28.1196	25.1722	28.7172	31.1747	18.9281	18.997	26.6291	19.3685	26.1081	27.8134	34.4235	17.3095	20.24	20.8373	18.0328	18.9245	19.0413	18.9214	20.5309	28.5218	27.5507	33.276	24.4844
703	16.1803	15.4972	16.46	16.8438	15.8562	27.4019	24.9098	23.9773	29.5678	31.9488	33.7801	30.6194	28.853	29.5118	31.5433	19.5561	25.0083	20.7027	20.6082	20.0857	26.959	23.8948	24.3797	26.3562	22.1161	26.2407	28.3262	25.3289	28.8897	31.2562	19.0406	19.1982	26.6346	19.4715	26.1465	27.9314	34.5765	17.3804	20.3304	20.8155	18.1459	18.843	19.1768	18.9761	20.5546	28.5789	27.6597	33.2724	24.6429
704	16.2379	15.4609	16.5088	16.8785	15.8944	27.4466	24.9285	24.0122	29.4659	31.9592	33.823	30.7642	28.8948	29.5541	31.4773	19.7864	24.9749	20.7157	20.6851	20.0658	27.0127	23.9869	24.322	26.5332	22.3362	26.3192	28.5798	25.4708	28.9699	31.3285	19.1039	19.1318	26.6817	19.6121	26.2211	28.0128	34.6073	17.4848	20.4684	20.8645	18.2397	18.8872	19.2433	19.1344	20.6367	28.6465	27.6234	33.3067	24.7636
705	16.2255	15.3967	16.3438	16.8832	15.9373	27.5654	24.8907	24.0561	29.3577	31.8302	33.7888	30.8519	28.9598	29.557	31.3996	19.8116	25.0058	20.7248	20.6468	20.1197	26.9927	23.9684	24.4054	26.619	22.2914	26.3277	28.5963	25.3621	29.0825	31.3488	19.0755	19.0766	26.6993	19.6143	26.2493	28.1137	34.5306	17.4881	20.4881	20.8723	18.214	18.9044	19.2262	19.1954	20.7055	28.694	27.7056	33.3699	24.7817
706	16.2756	15.4206	16.4185	16.8287	15.9556	27.432	24.871	24.0475	29.4118	31.8231	33.7226	30.7683	29.0061	29.4735	31.4649	19.7383	25.0281	20.7781	20.7056	20.1576	27.0074	24.0144	24.5534	26.6485	22.3277	26.4148	28.7163	25.3385	29.2414	31.4172	19.1273	19.1101	26.6587	19.6938	26.3572	28.1315	34.5771	17.5779	20.499	20.8341	18.2434	18.9564	19.2636	19.217	20.6615	28.7544	27.8069	33.3392	24.7923
707	16.2227	15.5101	16.4679	16.8552	15.9703	27.3863	24.8065	24.0035	29.4434	31.7669	33.8194	30.7273	28.9264	29.5005	31.588	19.7617	24.965	20.8361	20.7285	20.1655	27.0852	24.1638	24.6262	26.727	22.4101	26.5475	28.7901	25.5128	29.2968	31.4123	19.128	19.1402	26.6313	19.7198	26.3302	28.0594	34.6943	17.6541	20.5562	20.8432	18.3451	18.9481	19.3035	19.2901	20.5951	28.8442	27.9121	33.3988	24.7095
708	16.3833	15.635	16.6131	16.9582	16.085	27.5452	24.9572	24.0953	29.5384	31.8082	33.8665	30.7777	29.0262	29.6105	31.6882	19.9133	25.106	20.9903	20.9048	20.3753	27.2004	24.2645	24.8383	26.8923	22.5236	26.6998	28.9507	25.6377	29.4341	31.521	19.2992	19.3548	26.7642	19.7828	26.4452	28.2913	34.8463	17.8168	20.6646	21.0531	18.541	19.0935	19.4317	19.4255	20.7361	29.004	28.1465	33.441	24.7801
709	16.4451	15.6863	16.6158	16.9499	16.0403	27.5883	24.9824	24.1163	29.486	31.7158	33.8925	30.8314	29.0827	29.5553	31.603	19.8953	25.2436	21.0537	20.9596	20.4932	27.2417	24.3647	24.8247	26.9844	22.613	26.7136	29.0059	25.6573	29.4384	31.6267	19.3179	19.4082	26.8866	19.8803	26.4162	28.4649	34.8509	17.942	20.6771	21.1711	18.5294	19.1176	19.5483	19.4977	20.8468	28.9553	28.1434	33.4002	24.9742
710	16.4855	15.7205	16.71	16.9697	16.1269	27.5509	24.9921	24.0707	29.4255	31.6658	33.9226	30.831	29.0617	29.6036	31.5916	19.8411	25.2905	21.1028	21.0979	20.5278	27.3075	24.4686	24.8664	27.0128	22.7044	26.8225	29.1345	25.6732	29.5164	31.7552	19.3749	19.4225	27.0346	19.9876	26.5482	28.4745	34.9042	18.0621	20.6648	21.1781	18.5346	19.1743	19.5972	19.5591	20.9614	28.9852	28.1001	33.384	25.0509
711	16.5267	15.7615	16.7325	17.0616	16.3322	27.7641	25.0267	24.1628	29.3933	31.656	33.8771	30.9292	28.9514	29.6466	31.6062	19.955	25.3012	21.1944	21.0883	20.5628	27.3122	24.5783	24.9754	26.937	22.7294	26.9135	29.2691	25.8004	29.6405	31.8196	19.4708	19.5239	27.1559	20.0392	26.7412	28.5642	34.9063	18.0032	20.7337	21.2206	18.542	19.2187	19.5417	19.5577	20.9848	29.0966	28.0862	33.533	25.0648
712	16.5773	15.7399	16.6625	17.1761	16.213	27.8675	24.9907	24.1433	29.3818	31.7569	33.8626	30.9909	28.9049	29.6772	31.569	20.0528	25.3208	21.3292	21.0903	20.5385	27.2447	24.6303	25.0539	27.0221	22.7936	26.9507	29.2651	25.9002	29.6969	31.7589	19.4664	19.6259	27.1596	20.2008	26.6725	28.4843	35.1598	18.0964	20.8313	21.234	18.5534	19.1852	19.6103	19.5934	20.9776	29.1101	28.1406	33.5282	25.139
713	16.5019	15.7331	16.6862	17.1916	16.1354	27.8279	25.0556	24.106	29.3656	31.7306	33.8913	31.0909	28.9968	29.6916	31.552	19.9923	25.3312	21.3271	21.1997	20.5916	27.2954	24.6625	25.1484	27.1452	22.7508	27.0055	29.1871	25.9377	29.7891	31.726	19.586	19.7193	27.1591	20.1582	26.6636	28.5372	35.2511	18.2483	20.8531	21.4405	18.6285	19.2513	19.7173	19.6949	20.9048	29.2219	28.0947	33.4532	25.268
714	16.5928	15.9361	16.865	17.2961	16.2345	28.0291	25.0575	24.2802	29.517	31.8512	34.121	31.2512	29.1489	29.7767	31.7086	20.197	25.5214	21.4543	21.432	20.8237	27.4111	24.9026	25.4138	27.3484	22.9148	27.1773	29.302	26	30.0229	31.8609	19.8476	19.8794	27.367	20.3294	26.8329	28.7816	35.2744	18.2932	20.9099	21.6322	18.778	19.4179	19.8598	19.7508	21.0833	29.4274	28.1307	33.7243	25.5092
715	16.7219	15.9594	16.9115	17.2237	16.3325	28.1471	25.0742	24.2984	29.6161	31.8782	34.2156	31.2844	29.239	29.7378	31.6918	20.1964	25.6059	21.524	21.5145	20.8985	27.4404	24.9584	25.5404	27.3894	23.1721	27.2988	29.464	26.0894	30.1208	32.0012	19.9253	19.9306	27.4608	20.4581	26.9247	28.991	35.2575	18.305	20.9838	21.6802	18.9464	19.5093	19.9219	19.7702	21.0894	29.4341	28.1814	33.8526	25.5447
716	16.7416	15.9834	16.797	17.2622	16.2902	28.117	25.056	24.2637	29.5386	31.7295	34.0669	31.1183	29.1884	29.719	31.6838	20.1109	25.5028	21.3897	21.4148	20.9342	27.3383	24.8612	25.4506	27.4215	23.2017	27.2486	29.5054	26.121	30.0691	31.9275	19.9094	19.8821	27.4706	20.4729	26.9029	28.9079	35.1142	18.4228	21.0533	21.6656	18.8473	19.4584	19.8491	19.8153	21.252	29.4283	28.2451	33.8147	25.3863
717	16.7667	15.8962	16.7847	17.303	16.3359	28.1529	24.9927	24.2401	29.3898	31.5218	34.0088	31.0603	29.2181	29.7481	31.6781	20.3279	25.5586	21.3951	21.4952	20.8571	27.2715	24.908	25.4656	27.591	23.0651	27.3263	29.4352	26.1896	30.0596	31.9632	19.9169	19.9461	27.4662	20.4771	26.8015	28.816	35.1083	18.5667	21.0139	21.8158	18.8984	19.4797	19.8931	19.8189	21.4791	29.5846	28.2776	33.8517	25.4485
718	16.7693	15.829	16.8652	17.2264	16.3665	28.0794	24.9867	24.0809	29.3702	31.4876	33.9427	31.0163	29.1345	29.7362	31.6164	20.375	25.5545	21.4174	21.4145	20.7782	27.4191	24.8597	25.4847	27.6362	22.9743	27.2398	29.457	26.2565	30.0298	31.9838	19.9872	19.9652	27.4662	20.4448	26.7478	28.6933	35.2235	18.5905	20.9872	21.8818	18.9567	19.6829	20.0737	19.8193	21.3862	29.5421	28.2192	33.7331	25.4661
719	16.7307	15.8885	16.8549	17.1963	16.388	27.9732	25.0851	24.0466	29.3547	31.399	33.9675	30.984	29.007	29.637	31.5793	20.3314	25.6222	21.4946	21.4785	20.7553	27.4701	24.8957	25.5152	27.5635	23.0029	27.1435	29.3984	26.2207	30.0918	31.9706	20.0483	19.905	27.5428	20.4057	26.6846	28.6864	35.2174	18.5992	21.0807	21.883	18.9238	19.6472	20.1617	19.9597	21.3864	29.46	28.14	33.6523	25.5012
720	16.8102	16.0099	16.9076	17.2441	16.4876	28.0162	25.04	24.1054	29.2196	31.5609	33.9078	30.9769	29.0038	29.5282	31.4628	20.2928	25.6666	21.5091	21.4797	20.8961	27.4902	25.0225	25.5796	27.5126	23.1218	27.1364	29.4829	26.2797	30.0364	32.0393	20.0387	20.0298	27.6027	20.4565	26.7997	28.6208	35.0313	18.7294	21.1973	21.9275	18.9458	19.6328	20.1755	20.0814	21.3531	29.462	28.154	33.7019	25.5767
721	16.8529	16.0054	16.954	17.2451	16.4573	27.9924	24.9692	24.1628	29.2201	31.5618	33.7994	30.7971	29.0662	29.5127	31.3992	20.3437	25.601	21.5611	21.4286	20.9257	27.4668	25.0248	25.7884	27.567	23.3135	27.1297	29.4111	26.395	30.2118	32.1836	20.2034	20.1569	27.6754	20.4656	26.8995	28.6922	34.8908	18.9405	21.2806	21.989	19.0346	19.6838	20.1291	20.1402	21.4359	29.7163	28.2637	33.8824	25.6639
722	16.8396	15.9128	16.9691	17.1683	16.3057	27.8368	24.88	24.1755	29.1473	31.4269	33.6715	30.8171	28.9986	29.5643	31.4205	20.2932	25.5051	21.4728	21.5552	20.9538	27.3844	25.0898	25.7576	27.5171	23.3569	27.2174	29.3437	26.3898	30.2025	32.2322	20.2497	20.2211	27.7787	20.5705	26.8811	28.7486	34.8327	18.9133	21.3983	22.0927	19.089	19.855	20.1269	20.1731	21.5632	29.6331	28.2171	34.0308	25.6368
723	16.9962	16.0707	17.1308	17.3418	16.479	27.9653	25.0689	24.1784	29.1247	31.4958	33.5553	30.8447	29.1172	29.6734	31.4326	20.4241	25.6144	21.4921	21.7168	21.0844	27.5195	25.0594	25.7484	27.66	23.4166	27.2891	29.2521	26.5342	30.1913	32.1944	20.3366	20.36	28.0478	20.7455	26.963	28.8809	34.8974	18.9617	21.5379	22.2247	19.2729	20.0271	20.2825	20.3247	21.8448	29.7481	28.3929	34.0318	25.8114
724	17.0132	16.2212	17.0715	17.4132	16.5467	27.9243	25.1028	24.1542	29.0993	31.3939	33.6031	30.7151	29.153	29.6955	31.431	20.3461	25.6807	21.4669	21.8371	21.096	27.6159	25.1003	25.7104	27.6609	23.3585	27.2289	29.2967	26.4713	30.2268	32.2533	20.364	20.4043	28.1885	20.8457	26.9616	28.8104	34.7432	19.1491	21.6571	22.3945	19.3648	20.0511	20.4347	20.5014	21.8546	29.882	28.562	33.9941	25.8895
725	16.863	16.2059	17.124	17.3969	16.5848	27.8774	25.0823	24.1051	29.112	31.2558	33.5998	30.8759	29.095	29.7188	31.3525	20.421	25.6735	21.448	21.8261	21.0736	27.6659	25.146	25.7455	27.7773	23.4814	27.3768	29.3792	26.3828	30.2179	32.4567	20.4463	20.5526	28.28	20.9311	26.9515	28.6707	34.6877	19.2856	21.7889	22.5032	19.5178	20.1054	20.6062	20.5024	21.8504	29.8989	28.6084	33.9902	26.0449
726	17.0393	16.3234	17.2588	17.687	16.7329	27.8867	25.0533	24.218	29.0819	31.3911	33.5568	30.9212	29.1131	29.67	31.2927	20.5925	25.8831	21.6129	21.8892	21.4036	27.8787	25.2716	25.9867	27.9829	23.6647	27.5625	29.4643	26.3584	30.335	32.4933	20.5829	20.6747	28.4334	21.1301	27.1834	28.7759	34.6554	19.4128	21.888	22.7572	19.712	20.2996	20.7705	20.525	21.9601	29.9222	28.7577	34.0804	26.0233
727	17.1162	16.3248	17.1909	17.6218	16.7275	27.7404	24.934	24.1331	29.0341	31.3008	33.5534	30.7227	28.7609	29.3801	31.1653	20.59	25.8856	21.5345	21.9676	21.3297	27.9615	25.3126	25.8996	27.8962	23.6384	27.524	29.3681	26.4151	30.2321	32.4033	20.6139	20.657	28.2434	21.0707	27.0566	28.7664	34.5198	19.4285	21.7069	22.6817	19.6534	20.2486	20.639	20.4087	21.8665	29.934	28.6727	33.9373	25.8807
728	17.0737	16.3362	17.1185	17.4761	16.7112	27.9505	25.0703	24.1741	29.1995	31.3878	33.5947	30.7475	28.7181	29.4688	31.1384	20.4622	25.9398	21.555	21.967	21.3209	28.1632	25.3333	25.8943	27.9404	23.7053	27.5106	29.3634	26.4663	30.3428	32.4075	20.5503	20.7808	28.5007	21.054	27.0612	28.8469	34.5404	19.4522	21.8206	22.7584	19.6459	20.2418	20.6037	20.524	21.9287	29.9358	28.7628	34.04	25.92
729	17.0121	16.4799	17.0786	17.5161	16.7375	28.0973	25.1371	24.2448	29.201	31.4501	33.4934	30.8394	28.7891	29.6241	31.1789	20.4864	25.8785	21.5358	22.0958	21.3321	28.1251	25.31	25.8837	28.0056	23.798	27.5167	29.2494	26.5503	30.4877	32.4655	20.6077	20.8781	28.7706	21.1737	26.9972	28.706	34.663	19.5196	21.9101	22.8161	19.7342	20.342	20.701	20.5428	22.0537	29.9268	28.8155	34.1852	26.027
730	16.992	16.5031	17.0594	17.5824	16.703	27.9369	25.0631	24.1847	28.9951	31.2671	33.3945	30.7345	28.9359	29.3335	31.1935	20.4952	25.8463	21.6011	22.1478	21.155	28.0818	25.1691	25.8958	27.9494	23.8385	27.4176	29.2742	26.5885	30.5058	32.3693	20.6739	20.818	28.7563	21.1627	26.9143	28.6685	34.6749	19.567	21.7663	22.7765	19.7616	20.2354	20.8839	20.4637	22.2042	30.0603	28.8316	34.0537	26.0621
731	16.9788	16.4804	17.0665	17.4396	16.7873	27.6617	24.8783	24.1068	28.8275	31.2646	33.3453	30.6605	29.002	29.1705	30.9366	20.6109	25.9545	21.6847	21.9916	21.1807	28.2104	25.2561	25.7616	27.8954	23.9794	27.3282	29.4002	26.5881	30.4256	32.2408	20.7247	20.955	28.6251	21.0408	26.9189	28.8302	34.5547	19.5359	21.8757	22.839	19.7569	20.1314	20.8749	20.5541	22.0826	30.0213	28.8006	33.8385	25.9783
732	17.1154	16.5393	17.1323	17.408	17.0046	27.6868	24.916	24.1665	28.8527	31.2352	33.3193	30.4779	28.9451	28.9523	30.9076	20.6827	25.9815	21.8609	21.9796	21.3863	28.29	25.4243	25.9236	27.9956	23.8975	27.3772	29.3597	26.5605	30.2505	32.3147	20.7691	20.9278	28.4129	21.0279	26.9833	28.6351	34.3268	19.667	22.1073	23.01	19.7521	20.2276	20.7385	20.5979	22.0186	29.8488	28.6452	33.935	25.907
733	17.3598	16.583	17.3079	17.6238	17.1171	27.8535	25.0102	24.3088	29.1065	31.1808	33.3882	30.457	28.8724	29.0858	31.0594	20.7474	26.0604	21.804	22.1771	21.5217	28.2263	25.5003	26.1695	28.0709	23.8601	27.5388	29.2723	26.6894	30.2042	32.5387	20.9618	20.8341	28.5377	21.2156	26.8924	28.5781	34.3113	19.7555	22.0799	23.0579	19.8336	20.3972	20.7611	20.8445	22.1201	29.8428	28.9316	34.0938	25.9302
734	17.367	16.6936	17.356	17.6246	16.9396	27.7544	24.9983	24.253	29.1651	30.9754	33.4776	30.4957	28.7516	29.2577	31.0747	20.793	26.1081	21.7212	22.2037	21.446	28.2222	25.4831	26.3972	27.9883	23.8214	27.5899	29.3273	26.6784	30.2982	32.4673	20.9545	20.9581	28.5013	21.296	26.9157	28.5391	34.2922	19.6008	22.0104	22.9354	19.9248	20.4254	20.848	20.7293	22.1151	29.7752	28.9688	34.0014	25.9287
735	17.3792	16.7309	17.253	17.623	16.8933	27.6741	24.8737	24.1686	28.9653	31.0254	33.4036	30.3512	28.798	29.1047	30.9454	20.7803	26.0613	21.7558	22.2359	21.4442	28.2414	25.3882	26.2404	27.9337	23.7917	27.6121	29.3964	26.595	30.2587	32.3265	20.8661	21.0258	28.4946	21.2685	26.8211	28.4974	34.1584	19.5215	22.038	22.9582	19.9708	20.5464	20.8889	20.641	22.0243	29.7379	28.8915	34.0659	25.9681
736	17.4472	16.7152	17.3977	17.7766	17.0243	27.7073	24.9011	24.3541	28.982	31.1474	33.3524	30.2953	28.8804	29.0284	30.8464	20.6608	26.0694	21.9706	22.2522	21.4854	28.4199	25.6108	26.1048	27.9	23.9545	27.7102	29.5486	26.623	30.3303	32.4178	20.9621	21.0508	28.3487	21.3314	26.7628	28.5128	34.1086	19.654	22.1148	22.9741	20.0802	20.6688	21.049	20.6607	22.143	29.6915	28.8294	33.9201	26.139
737	17.411	16.6559	17.7046	17.94	17.1198	27.6544	24.9984	24.2793	29.1069	31.2037	33.2736	30.481	28.9875	29.2239	31.0144	20.6591	26.0787	22.0451	22.2634	21.4107	28.6393	25.8025	26.1942	28.0186	24.1688	27.7731	29.8159	26.7666	30.5051	32.6127	21.1418	21.1909	28.4274	21.4053	26.7476	28.775	34.4051	19.9401	22.4428	23.1227	20.2049	20.8092	21.1921	20.8182	22.2531	29.776	29.0568	34.1574	26.2473
738	17.2333	16.6643	17.6388	17.8803	17.0469	27.6685	24.983	24.105	29.0941	31.0469	33.2813	30.5833	28.6826	29.2777	31.0969	20.6796	26.043	21.8869	22.1798	21.4687	28.629	25.8185	26.0996	28.0245	24.0403	27.7453	30.0013	26.828	30.4763	32.5885	21.2513	21.2174	28.794	21.3863	26.6745	28.7222	34.409	20.1635	22.5643	23.2841	20.2049	20.8289	21.1544	20.9673	22.3139	29.8592	28.8748	34.32	26.2361
739	16.9212	16.5862	17.3129	17.5747	16.7795	27.6376	24.7932	24.0845	28.9663	31.0101	33.1401	30.3306	28.585	29.0226	30.9456	20.4637	25.8411	21.6677	22.0236	21.1036	28.3076	25.6987	25.9978	27.8616	23.7705	27.6327	29.9801	26.6772	30.4116	32.4508	21.0516	21.1516	28.8028	21.264	26.5863	28.4777	34.1313	19.8906	22.4347	23.2416	20.1668	20.4861	20.9808	20.8292	22.1768	29.7248	28.5797	34.0898	26.1783
740	17.0397	16.6192	17.3192	17.5093	16.7151	27.7676	24.858	24.0709	28.8832	30.9564	33.1241	30.2943	28.7249	29.1813	30.9934	20.5196	25.7658	21.7106	21.8748	21.1296	28.183	25.7156	26.0618	27.9314	23.704	27.6906	29.9788	26.5413	30.6372	32.3946	21.1515	21.2721	28.7627	21.3077	26.6765	28.6191	34.1515	19.7913	22.2586	23.1685	20.1098	20.6105	20.9648	20.9798	22.2157	29.7293	28.6258	33.9338	26.2246
741	17.3662	16.7149	17.4783	17.7943	17.0409	28.11	24.9533	24.303	29.0832	31.2762	33.4425	30.3974	28.9181	29.4946	31.0877	20.7019	25.8358	21.9373	22.0746	21.3436	28.5759	25.9325	26.3043	28.1861	23.9991	28.0053	30.1608	26.8918	30.7162	32.7873	21.4542	21.5318	28.9389	21.5588	26.8807	28.8186	34.5036	20.1434	22.5796	23.4273	20.4498	20.9644	21.2285	21.3073	22.5043	29.9953	28.8385	34.0745	26.4307
742	17.5487	16.7145	17.462	17.8403	17.1188	27.9802	25.0303	24.4771	29.1002	31.284	33.3947	30.5113	28.6939	29.4308	31.1885	20.8367	25.8954	21.9835	22.1093	21.4444	28.5698	25.9915	26.4061	28.3551	24.2745	27.9287	30.2783	26.9562	30.6539	32.8106	21.4606	21.5114	29.18	21.6455	26.8512	28.6832	34.4482	20.3259	22.725	23.4361	20.4727	21.1415	21.6112	21.4507	22.6804	29.9172	28.7741	34.0624	26.4251
743	17.8215	16.7802	17.6059	18.0912	17.2928	27.8423	25.2753	24.4731	29.2804	31.4445	33.4892	30.5855	28.8288	29.2877	31.2546	21.0852	25.9156	22.182	22.2247	21.6653	28.7461	26.0891	26.4836	28.4966	24.3458	27.9769	30.3901	27.1868	30.5699	32.8493	21.61	21.7731	29.2036	21.8719	26.9287	28.8689	34.3391	20.3583	22.9146	23.5359	20.5397	21.461	21.8984	21.7739	22.8534	30.0639	28.7087	33.9692	26.3544
744	17.8317	16.9398	17.7657	17.9525	17.356	27.8422	25.1566	24.5213	29.3015	31.3835	33.6002	30.575	29.0194	29.2769	31.2691	21.1862	25.9731	22.2488	22.4299	21.7634	28.692	26.1733	26.4358	28.5251	24.3726	28.165	30.4219	27.1169	30.5178	32.9387	21.7744	21.7608	29.2021	21.8647	26.891	28.772	34.1331	20.424	22.9633	23.5429	20.5547	21.3981	21.6696	21.9311	22.9628	30.0983	28.7727	33.8521	26.2822
745	17.7846	17.0224	17.7856	18.1342	17.3231	27.7981	25.1427	24.535	29.4268	31.4451	33.7099	30.4832	29.1441	29.2914	31.374	21.1307	26.005	22.1538	22.4532	21.9096	28.6292	26.157	26.6222	28.4434	24.6389	28.3918	30.7241	27.3379	30.6466	32.8086	21.9087	21.8102	29.2824	21.9947	26.8911	28.6731	34.3224	20.4776	22.9686	23.5602	20.7637	21.3194	21.5829	21.8731	23.0993	30.2196	28.9292	34.138	26.5447
746	17.7289	16.8782	17.737	18.196	17.1995	27.6521	25.1618	24.4587	29.2287	31.4438	33.575	30.4027	29.0287	29.2451	31.175	20.8493	25.8999	22.0701	22.1467	21.6578	28.422	26.223	26.5421	28.1788	24.4037	28.4262	30.6968	27.3639	30.8562	32.5327	21.8196	21.8643	29.1958	21.843	26.9333	28.662	34.33	20.475	22.968	23.7945	20.7468	21.1807	21.6266	21.5302	22.9464	30.3488	29.044	34.0199	26.6023
747	17.7752	17.0447	17.9048	18.2124	17.3589	27.7486	25.1946	24.6027	29.2169	31.5666	33.4604	30.5816	29.2079	29.3748	31.2385	20.9716	26.0564	22.2824	22.2283	21.8043	28.536	26.4179	26.4914	28.2935	24.4267	28.44	30.827	27.6014	30.9802	32.7686	21.9278	21.961	29.2445	21.9678	27.0684	28.8027	34.2144	20.5988	23.068	23.9291	21.0633	21.295	21.8863	21.6868	22.9758	30.4544	29.3495	34.1307	26.808
748	17.7588	17.2111	18.0464	18.2931	17.4159	27.7906	25.2921	24.4817	29.3679	31.4748	33.348	30.4979	29.1594	29.2384	31.2045	21.1725	26.058	22.3389	22.356	21.9881	28.6385	26.3409	26.5949	28.3464	24.3948	28.4211	30.8827	27.6709	30.8197	32.9885	21.9949	21.9081	29.1813	21.984	27.0905	28.7483	34.3975	20.7417	23.0498	23.8374	21.2554	21.4142	21.9234	21.8732	23.1513	30.479	29.311	34.2131	26.8859
749	17.6578	16.9813	17.7779	18.3356	17.3085	27.9971	25.2409	24.4409	29.4068	31.4196	33.3612	30.5724	29.1128	29.3368	31.0812	21.0944	25.9125	22.0912	22.2054	21.9525	28.5083	26.3248	26.6558	28.5269	24.3876	28.3228	30.8315	27.35	30.7629	32.9535	21.8883	21.8172	29.2226	22.0187	26.9637	28.7206	34.3319	20.7933	23.0014	23.7342	21.1413	21.4355	21.8641	21.8607	23.2103	30.3573	29.1744	34.1769	26.8053
750	17.7512	17.1856	17.6454	18.2594	17.4659	28.0953	25.1949	24.4797	29.4078	31.5697	33.4868	30.6901	29.0719	29.5619	31.1259	21.1492	25.7916	22.03	22.1262	22.0317	28.7957	26.3939	26.4812	28.5741	24.457	28.1711	30.8222	27.4484	30.923	33.2388	21.7169	22.0194	29.2666	22.1789	26.9562	28.7743	34.2095	20.8316	23.0822	23.8617	21.1996	21.4377	21.9425	21.8082	23.1874	30.2309	29.3147	33.9531	26.8296
[truncated: 19 more columns]
