# Supplementary material for: Molecular basis of wax-based color change and UV reflection in dragonflies
Source: eLife. 2019 Jan 15;8:e43045. doi: 10.7554/eLife.43045 (PMC6353593; doi:10.7554/eLife.43045)
Supplement: Figure 7—source data 5. [file elife-43045-fig7-data5.xlsx]

## Sheet: Cservilia-OCEAN
	Male	Male	Male	Male	Male	Male	Male	Male	Female	Female	Female	Female	Female	Female	Female	Female
wavelength	M1D5	M2D5	M3D5	M4D5	M5D5	M1V5	M2V5	M3V5	F1D5	F2D5	F3D5	F4D5	F1V5	F2V5	F3V5	F4V5	male D	male V	female D	female V
300	0.882	1.565	1.103	1.01	1.02	3.638	3.412	1.659	1.026	1.807	2.422	1.381	1.001	3.355	7.029	7.06	1.116	2.903	1.659	4.61125	0.263143	1.08325	0.600568	2.96951
301	0.961	1.581	1.018	1.008	1.08	3.537	3.701	1.83	1.001	1.846	2.55	1.583	1.047	3.37	7.105	6.806	1.1296	3.02267	1.745	4.582	0.255876	1.03613	0.642393	2.90269
302	0.924	1.584	0.745	0.952	0.88	3.57	3.373	1.707	0.971	1.844	2.711	1.48	1.005	3.294	6.974	6.591	1.017	2.88333	1.7515	4.466	0.326771	1.02349	0.73305	2.83771
303	0.902	1.52	1.004	1.004	0.687	3.89	3.52	2.114	1.029	1.851	2.622	1.533	1.064	3.351	7.644	6.999	1.0234	3.17467	1.75875	4.7645	0.306295	0.937009	0.667635	3.10785
304	0.969	1.583	0.974	1.048	0.912	3.489	3.321	1.834	1.02	1.807	2.777	1.708	1.01	3.302	6.926	6.884	1.0972	2.88133	1.828	4.5305	0.275833	0.910899	0.723027	2.89715
305	0.895	1.524	0.791	0.886	0.917	3.595	3.342	1.887	1.042	1.805	2.467	1.529	1.034	3.325	7.085	6.537	1.0026	2.94133	1.71075	4.49525	0.295437	0.921801	0.594715	2.84167
306	0.87	1.483	1.259	1.131	1.216	3.755	3.819	2.027	0.944	1.817	2.592	1.728	1.008	3.357	7.637	6.773	1.1918	3.20033	1.77025	4.69375	0.222008	1.01664	0.673779	3.0745
307	0.944	1.535	0.836	0.825	0.792	3.397	3.321	1.824	0.988	1.777	2.464	1.27	1.023	3.314	6.99	6.502	0.9864	2.84733	1.62475	4.45725	0.311938	0.887047	0.64777	2.81051
308	0.907	1.519	1.41	1.171	0.998	3.981	3.298	2.072	1.03	1.816	2.896	1.638	1.041	3.332	7.43	6.877	1.201	3.117	1.845	4.67	0.261414	0.967285	0.777285	3.0248
309	0.95	1.531	1.025	0.848	0.959	3.349	3.305	1.741	0.946	1.754	2.556	1.443	1.014	3.299	7.294	6.335	1.0626	2.79833	1.67475	4.4855	0.269387	0.915942	0.675195	2.87329
310	0.935	1.529	0.926	0.816	0.827	3.989	3.571	1.664	0.941	1.759	2.513	1.697	0.995	3.296	7.351	6.513	1.0066	3.07467	1.7275	4.53875	0.297115	1.23942	0.642266	2.93876
311	0.914	1.469	0.93	1.029	0.941	3.48	3.228	1.838	1.021	1.822	2.692	1.412	1.098	3.31	6.993	6.522	1.0566	2.84867	1.73675	4.48075	0.23482	0.884286	0.715898	2.78638
312	0.943	1.538	1.24	1.05	0.983	3.753	3.462	1.832	0.946	1.717	2.77	1.552	1.015	3.255	7.014	6.612	1.1508	3.01567	1.74625	4.474	0.244632	1.03536	0.758739	2.85618
313	0.909	1.51	0.887	0.843	0.71	3.449	3.416	1.819	0.92	1.752	2.418	1.398	0.984	3.302	7.021	6.256	0.9718	2.89467	1.622	4.39075	0.310613	0.931701	0.630739	2.78021
314	0.929	1.496	0.959	0.881	1.014	3.444	3.477	2.04	0.932	1.736	2.474	1.505	1.025	3.313	7.356	6.253	1.0558	2.987	1.66175	4.48675	0.250762	0.820292	0.638323	2.87017
315	0.881	1.488	0.855	0.765	0.787	3.464	3.52	1.755	0.917	1.729	2.486	1.417	1.023	3.231	6.782	6.186	0.9552	2.913	1.63725	4.3055	0.301616	1.00325	0.657283	2.6832
316	0.906	1.469	1.492	1.282	1.183	3.991	3.305	2.156	0.955	1.699	2.786	1.979	1.07	3.264	7.462	6.489	1.2664	3.15067	1.85475	4.57125	0.239285	0.927184	0.756411	2.94403
317	0.945	1.484	0.823	0.79	0.612	3.437	3.092	1.59	0.925	1.689	2.38	1.157	0.982	3.218	6.573	5.984	0.9308	2.70633	1.53775	4.18925	0.331403	0.982042	0.646193	2.59057
318	0.845	1.418	0.818	0.864	1.114	3.854	3.331	1.796	0.905	1.694	2.535	1.705	0.995	3.291	7.309	6.4	1.0118	2.99367	1.70975	4.49875	0.256256	1.06967	0.665565	2.90099
319	0.877	1.463	0.978	0.978	1	3.581	3.445	1.694	0.902	1.723	2.387	1.774	1.019	3.242	6.992	6.526	1.0592	2.90667	1.6965	4.44475	0.230729	1.0524	0.609571	2.82857
320	0.885	1.467	0.731	0.697	0.983	3.599	3.336	1.702	0.837	1.63	2.091	1.508	0.995	3.201	6.558	6.455	0.9526	2.879	1.5165	4.30225	0.310056	1.02776	0.517921	2.70021
321	0.866	1.423	1.105	0.791	0.965	3.559	3.129	1.547	0.872	1.623	2.396	1.582	1.043	3.254	6.816	6.199	1.03	2.745	1.61825	4.328	0.249157	1.05954	0.622661	2.68548
322	0.899	1.472	0.975	0.81	0.928	3.312	3.429	1.715	0.891	1.676	2.49	1.585	1.008	3.224	7.023	6.048	1.0168	2.81867	1.6605	4.32575	0.261478	0.957592	0.654762	2.73634
323	0.907	1.466	0.733	0.768	0.863	3.651	3.226	1.572	0.888	1.639	2.162	1.442	1.004	3.205	6.794	6.546	0.9474	2.81633	1.53275	4.38725	0.298267	1.09838	0.526366	2.78668
324	0.916	1.43	1.036	1.095	0.954	3.486	3.415	1.896	0.898	1.663	2.791	1.861	1.06	3.241	6.583	6.312	1.0862	2.93233	1.80325	4.299	0.204475	0.898193	0.778488	2.63814
325	0.869	1.479	0.761	0.868	0.868	3.602	3.21	1.914	0.841	1.592	2.449	1.629	0.976	3.19	6.431	6.087	0.969	2.90867	1.62775	4.171	0.288862	0.883424	0.656939	2.5787
326	0.916	1.461	1.011	0.929	0.929	3.334	3.462	1.568	0.922	1.64	2.498	1.545	1.053	3.253	6.762	6.146	1.0492	2.788	1.65125	4.3035	0.233279	1.05849	0.648127	2.65257
327	0.892	1.397	1.065	1.065	1.123	3.289	3.497	1.899	0.858	1.643	2.385	1.61	0.997	3.255	7.156	6.102	1.1084	2.895	1.624	4.3775	0.183098	0.868808	0.623547	2.79176
328	0.895	1.443	0.976	0.735	0.678	3.009	3.354	1.436	0.835	1.614	2.354	1.424	1.02	3.198	6.604	5.834	0.9454	2.59967	1.55675	4.164	0.302842	1.02242	0.62648	2.55345
329	0.908	1.404	0.889	0.981	0.727	3.416	3.278	2.089	0.919	1.631	2.516	1.558	1.072	3.249	6.878	6.163	0.9818	2.92767	1.656	4.3405	0.253592	0.729577	0.656505	2.68545
330	0.89	1.461	0.931	0.757	0.931	3.307	3.213	1.63	0.872	1.58	2.247	1.409	1.035	3.173	6.986	5.88	0.994	2.71667	1.527	4.2685	0.270653	0.942254	0.566909	2.6856
331	0.902	1.387	0.933	0.793	0.875	3.383	3.36	1.808	0.843	1.609	2.24	1.528	1.025	3.264	6.218	5.856	0.978	2.85033	1.555	4.09075	0.234476	0.90276	0.571493	2.43061
332	0.855	1.42	1.021	0.986	1.093	3.61	3.112	1.663	0.882	1.626	2.565	1.746	1.046	3.252	7.102	5.903	1.075	2.795	1.70475	4.32575	0.211297	1.01147	0.689166	2.71447
333	0.86	1.416	0.779	0.886	0.52	3.094	2.976	1.642	0.803	1.602	2.15	1.181	1.002	3.17	6.413	5.716	0.8922	2.57067	1.434	4.07525	0.326645	0.80641	0.57823	2.478
334	0.858	1.407	1.024	0.835	0.882	3.389	3.2	1.836	0.834	1.593	2.306	1.483	1.041	3.213	6.989	6.471	1.0012	2.80833	1.554	4.4285	0.238501	0.847351	0.6029	2.80954
335	0.872	1.391	0.54	0.684	0.492	3.302	2.942	1.465	0.751	1.493	1.969	1.153	0.919	3.065	6.46	5.776	0.7958	2.56967	1.3415	4.055	0.364107	0.973456	0.516698	2.55346
336	0.849	1.347	0.751	0.921	0.703	3.355	3.488	1.696	0.821	1.548	2.059	1.381	0.991	3.181	6.516	6.008	0.9142	2.84633	1.45225	4.174	0.256346	0.998435	0.510185	2.5798
337	0.824	1.376	0.97	0.982	1.031	3.253	3.265	1.817	0.852	1.509	2.578	1.522	1.032	3.118	6.604	6.186	1.0366	2.77833	1.61525	4.235	0.204841	0.832561	0.714008	2.64105
338	0.849	1.379	0.701	0.776	0.501	3.354	2.903	1.339	0.829	1.519	2.403	1.389	0.993	3.113	6.395	5.631	0.8412	2.532	1.535	4.033	0.327465	1.05749	0.651519	2.46446
339	0.87	1.429	0.948	0.973	0.871	3.215	3.125	1.614	0.831	1.595	2.331	1.563	1.027	3.157	6.661	5.892	1.0182	2.65133	1.58	4.18425	0.234179	0.899483	0.612513	2.58677
340	0.89	1.394	1.072	0.968	0.889	3.596	3.439	1.451	0.782	1.497	2.314	1.647	0.957	3.041	6.721	6.106	1.0426	2.82867	1.56	4.20625	0.210233	1.19567	0.62858	2.69867
341	0.789	1.365	0.588	0.95	0.936	3.437	2.835	1.538	0.783	1.517	2.193	1.712	1.017	3.123	6.192	5.952	0.9256	2.60333	1.55125	4.071	0.285661	0.970465	0.58568	2.46728
342	0.863	1.425	0.906	1.143	0.906	3.291	3.388	2.022	0.764	1.492	2.468	1.617	1.024	3.07	6.553	5.745	1.0486	2.90033	1.58525	4.098	0.237542	0.762204	0.698427	2.53284
343	0.862	1.388	0.476	0.574	0.294	3.139	2.928	1.471	0.75	1.479	1.934	0.953	0.97	3.036	5.549	5.619	0.7188	2.51267	1.279	3.7935	0.426822	0.908258	0.533898	2.2331
344	0.826	1.395	0.823	0.621	0.765	3.06	2.959	1.458	0.763	1.479	2.194	1.27	0.946	2.988	6.424	5.659	0.886	2.49233	1.4265	4.00425	0.296444	0.897181	0.593447	2.51522
345	0.876	1.397	1.01	0.794	0.779	3.074	3.059	1.501	0.746	1.451	2.28	2.049	0.986	3.094	6.075	5.642	0.9712	2.54467	1.6315	3.94925	0.255056	0.903873	0.685942	2.37322
346	0.829	1.372	0.929	0.871	0.987	3.802	2.946	1.727	0.731	1.461	2.162	1.48	0.946	2.979	6.327	5.747	0.9976	2.825	1.4585	3.99975	0.217628	1.04278	0.584419	2.50575
347	0.876	1.389	1.086	0.881	0.749	3.42	3.039	1.718	0.763	1.45	2.466	1.424	0.971	3.055	6.812	5.843	0.9962	2.72567	1.52575	4.17025	0.250591	0.893216	0.702839	2.66182
348	0.834	1.41	0.66	0.836	0.528	2.685	3.258	1.482	0.734	1.428	2.157	1.159	0.904	2.936	6.119	5.473	0.8536	2.475	1.3695	3.858	0.336813	0.906432	0.597704	2.40115
349	0.816	1.352	0.831	0.86	0.816	3.516	3.204	1.602	0.773	1.552	2.27	1.647	0.971	3.069	6.245	5.949	0.935	2.774	1.5605	4.0585	0.233801	1.0269	0.614031	2.50776
350	0.852	1.422	0.963	0.859	0.948	3.408	3.037	1.674	0.773	1.456	2.223	1.763	0.967	3.022	5.971	5.601	1.0088	2.70633	1.55375	3.89025	0.236408	0.913069	0.608497	2.34914
351	0.823	1.387	0.791	0.933	0.949	3.258	2.894	1.613	0.736	1.48	2.42	1.803	0.927	2.99	6.2	5.393	0.9766	2.58833	1.60975	3.8775	0.239338	0.864049	0.700981	2.39331
352	0.787	1.284	0.889	0.715	0.651	3.303	2.906	1.588	0.794	1.481	1.889	1.461	1.024	3.099	6.446	5.414	0.8652	2.599	1.40625	3.99575	0.250258	0.897771	0.453315	2.4256
353	0.857	1.416	0.668	0.817	0.995	3.148	3.059	1.841	0.772	1.445	2.732	1.678	0.967	2.956	6.074	5.851	0.9506	2.68267	1.65675	3.962	0.285062	0.730262	0.813272	2.45023
354	0.82	1.376	0.857	0.769	0.739	3.636	3.119	1.567	0.728	1.506	2.173	1.404	0.959	3.043	6.09	5.765	0.9122	2.774	1.45275	3.96425	0.263231	1.07678	0.591392	2.42499
355	0.823	1.381	1.103	0.986	1.236	3.163	3.148	1.971	0.739	1.399	2.457	1.707	0.953	2.984	6.37	5.856	1.1058	2.76067	1.5755	4.04075	0.216231	0.683913	0.713026	2.54109
356	0.818	1.378	0.776	0.937	0.585	2.81	3.059	1.595	0.753	1.436	2.298	1.098	0.929	3.017	5.854	5.195	0.8988	2.488	1.39625	3.74875	0.296298	0.783318	0.662686	2.23683
357	0.793	1.308	0.729	0.715	0.418	2.564	2.767	1.282	0.768	1.479	1.93	1.201	0.969	3.062	6.006	5.277	0.7926	2.20433	1.3445	3.8285	0.322502	0.805187	0.487799	2.28064
358	0.839	1.39	0.727	0.727	1.049	3.146	3.048	1.552	0.738	1.414	2.223	1.608	0.957	3.049	5.942	6.04	0.9464	2.582	1.49575	3.997	0.280676	0.893351	0.611654	2.45609
359	0.82	1.354	0.898	1.129	1.075	3.483	3.537	1.741	0.745	1.459	2.476	1.66	0.972	2.995	6.013	5.564	1.0552	2.92033	1.585	3.886	0.209255	1.02169	0.712035	2.35408
360	0.85	1.316	0.986	0.709	1.056	3.695	3.32	1.959	0.717	1.406	2.251	1.945	0.997	3.042	6.488	5.502	0.9834	2.99133	1.57975	4.00725	0.228578	0.913477	0.672932	2.47533
361	0.807	1.396	0.556	0.612	0.835	2.782	2.935	1.433	0.712	1.459	2.281	1.28	0.994	3.037	6.19	5.439	0.8412	2.38333	1.433	3.915	0.332747	0.826561	0.648853	2.36653
362	0.779	1.32	0.791	0.958	0.86	3.497	3.289	1.304	0.699	1.435	2.068	1.443	0.995	3.041	6.203	5.565	0.9416	2.69667	1.41125	3.951	0.223178	1.21056	0.559819	2.3974
363	0.819	1.321	0.99	1.018	0.934	3.366	3.281	1.598	0.762	1.439	2.532	2.008	0.988	3.074	6.223	5.474	1.0164	2.74833	1.68525	3.93975	0.186573	0.997124	0.760303	2.38254
364	0.759	1.35	0.614	0.956	0.97	2.811	2.926	1.727	0.757	1.422	2.184	1.513	0.993	3.028	5.965	5.523	0.9298	2.488	1.469	3.87725	0.277386	0.661549	0.583756	2.31713
365	0.788	1.349	0.879	0.53	0.516	3.181	2.86	1.855	0.757	1.409	1.883	1.395	0.959	3.01	6.403	5.343	0.8124	2.632	1.361	3.92875	0.339328	0.691778	0.462154	2.43485
366	0.841	1.378	0.753	0.455	0.753	3.141	3.127	1.748	0.69	1.377	2.175	1.72	0.918	2.92	6.283	5.871	0.836	2.672	1.4905	3.998	0.336425	0.800238	0.625804	2.54151
367	0.834	1.366	0.853	0.674	0.757	3.069	3.165	1.583	0.718	1.453	1.982	1.693	1.016	3.017	5.78	5.753	0.8968	2.60567	1.4615	3.8915	0.271659	0.886955	0.540795	2.31408
368	0.835	1.36	0.764	0.566	0.863	2.885	2.956	1.683	0.763	1.432	2.263	1.443	0.983	3.011	6.294	5.205	0.8776	2.508	1.47525	3.87325	0.293572	0.715352	0.613938	2.36154
369	0.776	1.312	0.997	0.896	0.781	2.963	3.151	1.547	0.685	1.391	2.4	1.691	0.994	2.971	5.406	5.262	0.9524	2.55367	1.54175	3.65825	0.220781	0.876852	0.710778	2.09739
370	0.783	1.357	1.024	0.673	0.907	3.217	3.261	1.682	0.748	1.378	2.5	1.521	1.027	3.065	6.302	5.396	0.9488	2.72	1.53675	3.9475	0.263432	0.899204	0.724667	2.37697
371	0.856	1.375	0.967	0.678	0.952	2.77	3.332	1.471	0.74	1.393	1.861	1.76	0.988	2.968	5.915	5.626	0.9656	2.52433	1.4385	3.87425	0.256184	0.954513	0.507228	2.33702
372	0.836	1.383	0.588	0.72	0.867	2.718	2.806	1.249	0.741	1.423	1.939	1.704	1.019	3.012	5.818	5.333	0.8788	2.25767	1.45175	3.7955	0.302478	0.874638	0.518663	2.2194
373	0.864	1.428	0.857	0.738	0.945	3.072	3.249	1.565	0.706	1.348	2.333	1.433	1.017	2.95	6.188	5.479	0.9664	2.62867	1.455	3.9085	0.2684	0.925404	0.669283	2.37642
374	0.857	1.366	0.86	0.771	0.86	2.966	3.218	1.424	0.683	1.405	2.269	1.409	0.983	2.968	5.917	5.68	0.9428	2.536	1.4415	3.887	0.239628	0.971228	0.648708	2.35326
375	0.861	1.355	0.644	0.644	0.704	3.222	3.432	1.409	0.705	1.411	2.203	1.439	0.945	2.999	6.249	5.065	0.8416	2.68767	1.4395	3.8145	0.300409	1.11232	0.611892	2.33735
376	0.83	1.377	0.873	0.752	0.993	2.889	2.919	1.429	0.734	1.395	2.122	1.61	1.025	2.988	5.673	5.266	0.965	2.41233	1.46525	3.738	0.246265	0.851724	0.575017	2.16039
377	0.814	1.343	0.701	0.964	0.949	3.17	3.243	1.446	0.659	1.369	2.585	1.928	1.002	2.977	6.062	5.828	0.9542	2.61967	1.63525	3.96725	0.242412	1.01708	0.818877	2.42375
378	0.788	1.361	0.932	0.83	0.699	3.438	2.899	1.617	0.689	1.355	2.214	1.428	1.099	3.031	6.147	4.88	0.922	2.65133	1.4215	3.78925	0.259312	0.935422	0.624253	2.20311
379	0.852	1.44	0.929	1.101	0.786	3.217	2.845	1.444	0.687	1.359	2.216	1.687	1.016	2.991	5.991	5.405	1.0216	2.502	1.48725	3.85075	0.261825	0.934943	0.639746	2.29284
380	0.798	1.33	0.65	0.65	0.838	2.989	2.845	1.242	0.741	1.451	2.267	1.516	1.01	3.016	5.574	5.213	0.8532	2.35867	1.49375	3.70325	0.27982	0.969738	0.623664	2.12171
381	0.819	1.391	0.629	0.834	0.819	3.334	2.954	1.506	0.66	1.393	2.033	1.813	1.083	3.045	5.82	5.235	0.8984	2.598	1.47475	3.79575	0.288092	0.964597	0.604582	2.16731
382	0.816	1.395	0.862	0.416	0.732	2.743	3.001	1.536	0.66	1.342	2.211	1.436	1.05	2.993	5.816	5.5	0.8442	2.42667	1.41225	3.83975	0.353708	0.782053	0.634923	2.24809
383	0.813	1.383	0.855	0.599	1.055	3.164	3.278	1.34	0.751	1.408	2.109	1.924	1.144	3.113	6.099	4.959	0.941	2.594	1.548	3.82875	0.295425	1.08749	0.608524	2.17192
384	0.822	1.407	0.681	0.551	0.638	2.522	2.551	1.449	0.697	1.39	1.899	1.42	1.049	3.049	5.971	4.768	0.8198	2.174	1.3515	3.70925	0.342556	0.628036	0.494739	2.14082
385	0.824	1.353	0.902	0.759	0.73	3.237	3.266	1.547	0.703	1.392	2.134	1.561	1.083	3.063	6.23	5.228	0.9136	2.68333	1.4475	3.901	0.254384	0.9842	0.589216	2.29699
386	0.895	1.411	1.118	1.077	1.049	3.41	3.673	1.795	0.657	1.336	2.223	2.223	1.067	3.065	6.116	5.702	1.11	2.95933	1.60975	3.9875	0.188215	1.01688	0.760443	2.36998
387	0.779	1.358	0.811	1.007	0.769	3.006	3.173	1.789	0.687	1.329	2.181	1.887	1.058	3.018	6.473	5.271	0.9448	2.656	1.521	3.955	0.25045	0.755473	0.658781	2.40435
388	0.826	1.369	0.621	0.748	0.649	2.541	2.865	1.143	0.707	1.416	2.047	1.426	1.146	3.133	6.323	5.152	0.8426	2.183	1.399	3.9385	0.305331	0.91512	0.547657	2.28074
389	0.917	1.37	0.949	0.906	0.949	3.091	3.278	1.625	0.708	1.329	2.344	1.725	1.111	3.065	6.427	5.507	1.0182	2.66467	1.5265	4.0275	0.197592	0.905219	0.687182	2.40686
390	0.837	1.371	0.675	0.89	0.905	3.001	3.245	1.177	0.686	1.376	2.053	1.637	1.124	3.114	6.289	5.715	0.9356	2.47433	1.438	4.0605	0.259915	1.13013	0.573636	2.396
391	0.794	1.325	0.54	0.811	0.711	2.958	2.574	1.152	0.731	1.352	1.892	1.621	1.135	3.11	6.158	5.035	0.8362	2.228	1.399	3.8595	0.293577	0.951418	0.496912	2.20979
392	0.886	1.357	1.084	0.639	0.792	3.043	2.876	1.389	0.709	1.346	2.278	1.612	1.163	3.089	6.182	5.238	0.9516	2.436	1.48625	3.918	0.278107	0.910565	0.649736	2.24688
393	0.885	1.419	0.906	0.805	0.791	2.832	3.091	1.61	0.711	1.418	2.243	1.553	1.135	3.117	5.895	5.392	0.9612	2.511	1.48125	3.88475	0.260673	0.790962	0.627879	2.19571
394	0.908	1.39	0.579	0.42	0.681	2.983	3.099	1.303	0.69	1.305	2.056	1.796	1.177	3.114	6.068	5.083	0.7956	2.46167	1.46175	3.8605	0.37652	1.00511	0.601394	2.16995
395	0.938	1.411	0.983	0.924	1.027	3.022	3.301	1.907	0.685	1.354	2.23	1.907	1.136	3.099	6.147	4.944	1.0566	2.74333	1.544	3.8315	0.202201	0.737598	0.677334	2.191
396	0.845	1.394	1.072	0.872	0.672	2.773	2.802	1.458	0.712	1.328	2.359	1.53	1.27	3.159	6.119	4.489	0.971	2.34433	1.48225	3.75925	0.275775	0.767724	0.680208	2.05407
397	0.862	1.433	0.7	0.813	0.925	2.942	3.18	1.443	0.676	1.359	1.989	1.583	1.205	3.133	5.548	4.791	0.9466	2.52167	1.40175	3.66925	0.284108	0.941702	0.549623	1.9277
398	0.926	1.474	0.934	0.669	0.795	2.803	3.04	1.325	0.744	1.4	2.022	1.618	1.262	3.163	6.052	5.257	0.9596	2.38933	1.446	3.9335	0.307381	0.929326	0.534253	2.15795
399	0.839	1.393	0.929	0.985	0.943	3.026	3.223	1.52	0.699	1.4	1.801	1.506	1.272	3.26	6.262	5.263	1.0178	2.58967	1.3515	4.01425	0.216391	0.931581	0.466915	2.21364
400	0.916	1.431	1.225	0.86	1.269	3.368	3.252	1.837	0.728	1.375	2.333	1.881	1.271	3.141	6.095	4.958	1.1402	2.819	1.57925	3.86625	0.243476	0.852412	0.689332	2.11507
401	0.97	1.428	1.041	0.997	0.806	3.093	3.489	1.877	0.739	1.413	2.492	1.613	1.315	3.258	6.304	5.043	1.0484	2.81967	1.56425	3.98	0.230053	0.840041	0.722729	2.17213
402	0.922	1.438	1.087	0.759	1.087	3.291	3.335	1.474	0.731	1.39	2.248	2.219	1.314	3.134	6.269	5.003	1.0586	2.7	1.647	3.93	0.251981	1.06198	0.72881	2.1679
403	0.891	1.424	1.027	0.784	0.855	3.008	3.151	1.625	0.724	1.413	2.324	1.697	1.335	3.244	5.988	5.432	0.9962	2.59467	1.5395	3.99975	0.254948	0.842794	0.663649	2.13514
404	0.959	1.42	0.526	0.567	0.788	3.043	2.808	1.107	0.773	1.43	2.061	1.577	1.343	3.282	5.519	5.035	0.852	2.31933	1.46025	3.79475	0.362516	1.05647	0.531588	1.89607
405	0.97	1.445	0.952	0.91	0.938	2.979	3.255	1.669	0.737	1.394	2.179	1.697	1.39	3.203	6.014	5.2	1.043	2.63433	1.50175	3.95175	0.225792	0.847317	0.603667	2.07639
406	0.975	1.433	1.041	0.954	0.723	2.993	3.181	1.403	0.754	1.385	2.212	1.706	1.404	3.242	6.044	5.335	1.0252	2.52567	1.51425	4.00625	0.257616	0.976791	0.610549	2.10347
407	0.914	1.454	0.718	0.513	0.616	2.742	2.654	1.261	0.7	1.377	1.862	1.847	1.374	3.221	5.894	4.941	0.843	2.219	1.4465	3.8575	0.372296	0.830818	0.54624	1.99116
408	0.968	1.5	1.234	1.219	1.381	3.084	3.451	1.88	0.777	1.415	2.57	2.335	1.414	3.23	6.389	5.537	1.2604	2.805	1.77425	4.1425	0.199913	0.821822	0.830908	2.25601
409	1.02	1.49	0.838	0.985	0.956	3.131	3.308	1.602	0.759	1.387	2.44	1.691	1.481	3.284	5.337	5.395	1.0578	2.68033	1.56925	3.87425	0.251098	0.938048	0.698271	1.87335
410	0.953	1.491	1.268	1.344	1.525	3.246	3.412	1.812	0.664	1.336	2.582	2.084	1.37	3.222	6.266	5.481	1.3162	2.82333	1.6665	4.08475	0.228672	0.879764	0.841959	2.22273
411	0.96	1.453	0.768	0.722	0.798	2.901	3.07	1.566	0.815	1.428	2.303	1.858	1.52	3.287	6.018	5.266	0.9402	2.51233	1.601	4.02275	0.30035	0.823893	0.634187	2.02746
412	0.991	1.446	0.648	0.814	0.558	2.758	3.24	1.673	0.809	1.402	2.049	1.567	1.543	3.34	5.591	5.124	0.8914	2.557	1.45675	3.8995	0.351387	0.802604	0.511694	1.84632
413	1.055	1.518	1.025	0.826	0.995	3.137	3.305	1.699	0.752	1.419	2.372	1.974	1.555	3.305	6.381	5.065	1.0838	2.71367	1.62925	4.0765	0.258439	0.882733	0.703397	2.10087
414	0.984	1.5	0.957	1.02	0.861	2.918	3.412	1.499	0.753	1.405	2.184	1.706	1.571	3.449	5.899	5.15	1.0644	2.60967	1.512	4.01725	0.250544	0.993073	0.599097	1.92624
415	1.044	1.536	1.07	1.103	1.103	3.276	3.438	1.524	0.745	1.3	2.335	1.898	1.593	3.394	6.001	5.384	1.1712	2.746	1.5695	4.093	0.205428	1.06138	0.694342	2.00381
416	1.009	1.543	0.844	0.695	0.894	3.078	3.095	1.523	0.81	1.461	2.267	2.284	1.661	3.391	5.578	4.783	0.997	2.56533	1.7055	3.85325	0.325377	0.902727	0.709846	1.71841
417	1.042	1.449	0.85	1.02	0.986	3.094	3.026	1.173	0.824	1.485	2.312	1.989	1.681	3.51	5.746	5.457	1.0694	2.431	1.6525	4.0985	0.224933	1.08999	0.648753	1.89301
418	1.032	1.571	1.283	1.2	1.513	3.355	3.289	1.94	0.793	1.391	2.878	2.319	1.684	3.406	6.348	5.493	1.3198	2.86133	1.84525	4.23275	0.223026	0.79858	0.93177	2.10096
419	1.144	1.527	1.166	0.842	1.037	2.899	3.32	1.344	0.871	1.366	2.413	1.603	1.711	3.53	6.171	5.037	1.1432	2.521	1.56325	4.11225	0.249911	1.04082	0.643369	1.93207
420	1.089	1.53	1.135	1.179	1.015	3.329	3.703	1.821	0.823	1.388	2.956	2.18	1.705	3.502	6.076	5.211	1.1896	2.951	1.83675	4.1235	0.199732	0.996315	0.930879	1.9348
421	1.085	1.557	0.604	0.676	0.704	2.947	3.536	1.524	0.896	1.491	2.055	2.156	1.789	3.493	6.195	5.16	0.9252	2.669	1.6495	4.15925	0.399658	1.03441	0.581337	1.93285
422	1.051	1.569	0.913	1.044	1.116	3.074	3.697	1.334	0.832	1.461	2.291	2.276	1.837	3.533	5.93	5.321	1.1386	2.70167	1.715	4.15525	0.251631	1.22471	0.704912	1.85024
423	1.109	1.588	0.918	1.151	0.874	3.029	3.248	1.791	0.825	1.426	2.359	1.879	1.848	3.52	6.7	4.719	1.128	2.68933	1.62225	4.19675	0.283331	0.785648	0.653922	2.04235
424	1.097	1.631	0.642	1.03	1.328	2.746	3.522	1.373	0.848	1.424	2.432	1.91	1.858	3.479	6.163	5.148	1.1456	2.547	1.6535	4.162	0.366818	1.08823	0.676598	1.89307
425	1.107	1.597	0.891	0.845	1.122	3.027	3.688	1.706	0.844	1.451	2.259	2.351	1.854	3.618	6.454	5.486	1.1124	2.807	1.72625	4.353	0.29811	1.00915	0.713737	2.03986
426	1.097	1.594	0.864	0.725	0.956	3.008	3.393	1.373	0.86	1.445	2.53	2.19	1.927	3.491	6.216	5.291	1.0472	2.59133	1.75625	4.23125	0.334351	1.07252	0.749882	1.90786
427	1.057	1.641	0.889	1.07	0.95	2.668	3.377	1.794	0.889	1.539	2.789	2.05	2.023	3.688	6.014	5.261	1.1214	2.613	1.81675	4.2465	0.300067	0.792932	0.803646	1.77098
428	1.088	1.579	0.666	0.71	0.565	2.68	3.173	1.507	0.91	1.427	2.216	1.912	1.964	3.533	6.07	4.867	0.9216	2.45333	1.61625	4.1085	0.417473	0.855817	0.572064	1.76568
429	1.061	1.655	1.247	1.219	1.317	3.055	3.812	1.99	0.898	1.427	2.621	2.467	2.067	3.609	6.685	5.746	1.2998	2.95233	1.85325	4.52675	0.219548	0.915329	0.828718	2.08465
430	1.105	1.655	0.648	0.731	1.076	3.048	3.007	1.255	0.885	1.491	2.193	2.441	2.055	3.675	6.4	5.503	1.043	2.43667	1.7525	4.40825	0.397758	1.02356	0.704512	1.93572
431	1.091	1.659	0.839	1.01	1.274	3.124	3.559	1.818	0.912	1.489	2.704	2.471	2.045	3.635	6.263	5.532	1.1746	2.83367	1.894	4.36875	0.312743	0.906085	0.840115	1.90434
432	1.135	1.684	0.996	1.105	1.463	2.88	3.394	1.899	0.87	1.471	2.833	2.677	2.128	3.544	6.943	5.573	1.2766	2.72433	1.96275	4.547	0.286772	0.759559	0.949282	2.13316
433	1.151	1.704	1.204	1.096	1.096	3.241	3.951	1.883	0.896	1.428	2.933	2.593	2.151	3.607	6.884	6.236	1.2502	3.025	1.9625	4.7195	0.257616	1.05078	0.959603	2.22259
434	1.088	1.719	0.97	1.031	1.447	3.17	3.57	1.801	0.902	1.494	2.632	2.693	2.203	3.549	7.141	5.509	1.251	2.847	1.93025	4.6005	0.320691	0.927678	0.879745	2.1705
435	1.127	1.691	0.892	0.975	1.058	2.975	3.437	1.57	0.9	1.489	3.074	2.578	2.116	3.616	6.66	5.933	1.1486	2.66067	2.01025	4.58125	0.315774	0.972382	0.993019	2.09425
436	1.074	1.66	1.061	1.112	1.301	2.978	4.056	2.259	0.903	1.398	2.909	2.875	2.089	3.528	7.239	5.785	1.2416	3.09767	2.02125	4.66025	0.253026	0.904457	1.02566	2.29553
437	1.134	1.737	0.768	1.099	1.605	3.036	3.751	2.006	0.938	1.454	3.332	3.367	2.248	3.459	6.961	6.263	1.2686	2.931	2.27275	4.73275	0.396877	0.877226	1.26112	2.24375
438	1.14	1.636	0.95	1.344	1.111	2.921	4.05	1.703	0.906	1.361	3.154	2.921	2.21	3.483	6.846	6.595	1.2362	2.89133	2.0855	4.7835	0.263771	1.17378	1.11891	2.29852
439	1.136	1.752	0.7	0.516	1.198	2.599	3.281	1.604	0.969	1.357	2.912	3.115	2.163	3.437	7.134	5.751	1.0604	2.49467	2.08825	4.62125	0.48198	0.843354	1.08324	2.23873
440	1.021	1.691	0.749	0.974	1.443	2.829	3.897	1.743	1.006	1.488	3.26	2.848	2.244	3.488	7.214	6.033	1.1756	2.823	2.1505	4.74475	0.381992	1.07701	1.07491	2.27962
441	1.036	1.762	1.107	1.089	1.329	3.192	3.691	2.178	0.984	1.436	3.119	3.377	2.384	3.558	7.658	6.274	1.2646	3.02033	2.229	4.9685	0.299785	0.77097	1.19567	2.42259
442	1.121	1.794	1.019	1.164	1.455	2.911	3.747	2.11	1.029	1.466	3.747	3.638	2.279	3.461	7.822	6.149	1.3106	2.92267	2.47	4.92775	0.315039	0.818562	1.42355	2.51895
443	1.101	1.856	1.094	1.31	1.776	2.853	4.467	1.956	1.032	1.402	3.337	3.839	2.333	3.456	7.517	6.279	1.4274	3.092	2.4025	4.89625	0.366297	1.27245	1.39237	2.41004
444	1.086	1.81	0.886	0.661	1.234	2.764	4.12	1.512	0.948	1.495	3.233	3.685	2.329	3.48	7.405	6.223	1.1354	2.79867	2.34025	4.85925	0.434311	1.30435	1.3239	2.3555
445	1.139	1.804	1.358	1.293	1.865	2.864	4.255	2.471	0.985	1.52	3.666	3.584	2.426	3.357	8.362	6.971	1.4918	3.19667	2.43875	5.279	0.323512	0.937371	1.38747	2.84027
446	1.068	1.804	0.664	0.865	1.375	2.549	4.14	1.931	1.098	1.401	3.97	3.923	2.46	3.431	8.001	6.487	1.1552	2.87333	2.598	5.09475	0.44787	1.13966	1.56214	2.58809
447	1.114	1.887	0.854	1.128	1.57	3.11	4.711	2.15	1.091	1.393	3.873	4.132	2.562	3.388	7.974	7.074	1.3106	3.32367	2.62225	5.2495	0.412312	1.2938	1.60203	2.6733
448	1.174	1.947	0.656	0.901	1.496	2.519	4.122	1.755	1.138	1.55	3.145	4.259	2.447	3.476	7.922	6.472	1.2348	2.79867	2.523	5.07925	0.506355	1.20803	1.44517	2.55083
449	1.059	1.875	0.658	1.077	1.526	2.723	4.25	1.975	0.99	1.476	3.501	4.908	2.488	3.397	8.17	6.524	1.239	2.98267	2.71875	5.14475	0.469859	1.15952	1.82005	2.65628
450	1.158	2.057	0.923	1.307	1.799	2.783	4.583	2.46	1.112	1.511	4.183	4.813	2.566	3.379	9.257	7.766	1.4488	3.27533	2.90475	5.742	0.467356	1.14393	1.86475	3.27223
451	1.076	1.753	0.794	1.286	2.017	2.604	4.32	2.192	1.244	1.526	3.907	4.669	2.724	3.507	8.131	7.369	1.3852	3.03867	2.8365	5.43275	0.497346	1.12863	1.70856	2.71265
452	1.099	1.956	0.753	0.917	1.785	2.947	4.437	2.308	1.143	1.433	3.7	4.846	2.582	3.341	7.728	7.187	1.302	3.23067	2.7805	5.2095	0.536619	1.09248	1.78969	2.62351
453	1.164	2.014	0.893	1.471	2.413	3.289	4.876	2.595	1.289	1.629	4.231	5.421	2.717	3.445	8.975	7.603	1.591	3.58667	3.1425	5.685	0.620191	1.16927	2.00853	3.07297
454	0.955	1.818	0.91	1.397	1.917	2.909	5.054	2.291	1.129	1.54	4.387	4.826	2.705	3.474	8.596	7.15	1.3994	3.418	2.9705	5.48125	0.46908	1.45012	1.90498	2.84154
455	1.047	1.913	1.331	1.298	1.446	3.007	4.651	2.235	1.185	1.564	3.829	4.717	2.756	3.444	8.759	7.214	1.407	3.29767	2.82375	5.54325	0.318125	1.23395	1.71924	2.90448
456	1.024	1.953	0.68	0.81	1.652	2.154	4.389	1.765	1.231	1.411	3.595	5.457	2.823	3.442	8.308	7.336	1.2238	2.76933	2.9235	5.47725	0.552711	1.41609	2.00181	2.74805
457	1.063	1.907	0.766	1.111	1.502	2.748	4.835	2.162	1.242	1.415	3.739	4.73	2.863	3.474	8.589	7.252	1.2698	3.24833	2.7815	5.5445	0.44208	1.40498	1.72731	2.80844
458	0.903	1.845	0.926	1.099	1.837	3.008	4.585	2.083	1.246	1.558	3.891	5.279	2.868	3.48	8.36	7.434	1.322	3.22533	2.9935	5.5355	0.479807	1.26508	1.9273	2.76422
459	0.994	1.87	0.991	1.479	2.067	3.087	5.011	2.441	1.264	1.603	4.58	5.097	3.035	3.517	8.471	7.437	1.4802	3.513	3.136	5.615	0.492947	1.33691	1.98201	2.74071
460	1.029	1.859	0.457	1.053	1.344	2.702	4.49	1.912	1.262	1.506	3.728	5.114	3.071	3.454	8.37	7.47	1.1484	3.03467	2.9025	5.59125	0.511029	1.3208	1.84514	2.7185
461	0.983	1.896	0.799	1.012	1.891	2.757	4.555	2.104	1.421	1.552	3.676	5.221	3.131	3.552	8.657	7.632	1.3162	3.13867	2.9675	5.743	0.533296	1.26929	1.82351	2.80967
462	0.978	1.898	0.702	1.328	1.647	2.758	4.763	2.094	1.329	1.618	3.971	4.98	3.176	3.568	8.16	7.406	1.3106	3.205	2.9745	5.5775	0.484645	1.38951	1.78539	2.57021
463	0.966	1.895	0.943	1.003	1.719	2.507	4.895	2.125	1.397	1.626	4.047	5.54	3.194	3.521	8.62	7.283	1.3052	3.17567	3.1525	5.6545	0.462781	1.50119	1.99268	2.71122
464	0.984	1.942	0.995	1.271	1.894	2.937	5.143	2.409	1.396	1.656	4.435	5.61	3.318	3.619	8.967	7.792	1.4172	3.49633	3.27425	5.924	0.47171	1.45029	2.07763	2.87828
465	0.932	1.934	0.882	1.41	1.788	2.659	5.008	2.43	1.423	1.613	4.343	5.317	3.417	3.649	8.584	7.38	1.3892	3.36567	3.174	5.7575	0.480251	1.4269	1.95463	2.61695
466	0.935	1.817	0.665	0.802	1.937	2.945	5.007	2.12	1.489	1.707	4.068	5.42	3.462	3.716	8.972	7.162	1.2312	3.35733	3.171	5.828	0.598716	1.48701	1.90044	2.6909
467	0.894	1.771	0.59	1.066	1.838	2.541	4.787	2.178	1.44	1.692	4.265	5.422	3.452	3.737	8.292	7.146	1.2318	3.16867	3.20475	5.65675	0.550391	1.41322	1.95304	2.42959
468	0.983	1.866	0.675	1.029	1.881	2.832	4.768	2.323	1.511	1.716	3.839	5.852	3.573	3.721	8.198	7.545	1.2868	3.30767	3.2295	5.75925	0.55263	1.29004	2.04066	2.45429
469	0.905	1.886	0.874	1.301	1.858	3.038	4.579	2.317	1.575	1.771	4.153	5.913	3.695	3.802	8.721	7.41	1.3648	3.31133	3.353	5.907	0.492764	1.15551	2.07023	2.54961
470	0.908	1.821	0.785	1.102	1.745	2.748	4.984	2.301	1.614	1.667	4.123	5.344	3.695	3.789	8.463	7.242	1.2722	3.34433	3.187	5.79725	0.480545	1.43747	1.85414	2.42529
471	0.888	1.861	0.852	1.025	1.833	2.955	5.037	2.319	1.606	1.713	3.883	5.738	3.69	3.714	8.79	7.582	1.2918	3.437	3.235	5.944	0.511015	1.42166	1.97104	2.63541
472	0.906	1.867	0.828	1.222	1.719	2.785	4.825	2.381	1.581	1.738	4.39	5.788	3.762	3.797	8.625	7.641	1.3084	3.33033	3.37425	5.95625	0.469255	1.31009	2.06163	2.54543
473	0.901	1.848	0.685	1.193	1.838	2.895	4.792	2.19	1.581	1.77	4.185	5.623	3.856	3.851	8.488	7.315	1.293	3.29233	3.28975	5.8775	0.533474	1.34574	1.95576	2.38567
474	0.897	1.893	0.811	1.25	1.661	2.806	4.743	2.31	1.67	1.801	4.152	5.841	3.92	3.781	8.78	6.977	1.3024	3.28633	3.366	5.8645	0.47063	1.28566	2.00575	2.43994
475	0.87	1.892	0.792	1.037	1.983	2.766	4.777	2.393	1.68	1.786	4.149	5.787	3.961	3.886	8.625	7.333	1.3148	3.312	3.3505	5.95125	0.576192	1.28236	1.9843	2.40031
476	0.901	1.891	0.649	1.135	1.861	3.09	4.985	2.484	1.724	1.831	3.978	5.941	4.052	3.95	8.545	7.384	1.2874	3.51967	3.3685	5.98275	0.564233	1.30469	2.00479	2.33727
477	0.891	1.92	0.883	1.09	1.94	2.931	4.722	2.427	1.719	1.812	4.301	5.936	4.06	3.93	8.99	7.463	1.3448	3.36	3.442	6.11075	0.540656	1.20615	2.04805	2.5219
478	0.845	1.886	0.781	1.286	1.738	2.947	4.922	2.358	1.828	1.89	4.371	5.688	4.108	4.015	8.903	7.219	1.3072	3.409	3.44425	6.06125	0.502882	1.34298	1.90799	2.40958
479	0.897	1.952	0.968	1.138	1.751	2.889	4.951	2.254	1.874	1.892	4.227	5.801	4.229	4.016	8.705	7.426	1.3412	3.36467	3.4485	6.094	0.479295	1.41002	1.91851	2.33722
480	0.867	1.858	0.808	1.089	1.976	2.812	5.019	2.466	1.876	1.882	4.355	6.201	4.213	4.031	9.115	7.6	1.3196	3.43233	3.5785	6.23975	0.556887	1.38494	2.10215	2.52347
481	0.867	1.978	0.734	1.116	1.634	2.599	5.249	2.297	1.842	1.915	4.226	5.998	4.237	3.998	8.878	7.222	1.2658	3.38167	3.49525	6.08375	0.526092	1.62419	2.00235	2.37096
482	0.865	1.926	0.813	1.294	1.972	3.026	4.967	2.574	1.901	1.91	4.222	6.202	4.246	4.036	9.227	7.443	1.374	3.52233	3.55875	6.238	0.55734	1.27137	2.0731	2.53002
483	0.877	1.917	0.832	1.161	2.055	2.84	5.076	2.487	1.917	1.948	4.181	5.97	4.352	4.117	8.779	7.233	1.3684	3.46767	3.504	6.12025	0.579783	1.404	1.95612	2.26913
484	0.913	1.905	0.804	1.032	1.958	2.811	4.899	2.324	1.897	1.871	4.298	5.971	4.277	4.021	8.928	7.23	1.3224	3.34467	3.50925	6.114	0.562159	1.36794	1.99713	2.37482
485	0.889	1.943	0.892	0.986	1.861	2.744	4.639	2.375	1.965	1.938	4.313	6.268	4.375	4.084	8.969	7.452	1.3142	3.25267	3.621	6.22	0.538782	1.21469	2.08649	2.38337
486	0.883	1.993	0.863	1.258	2.121	2.948	5.151	2.22	1.9	1.883	4.216	6.139	4.318	4.037	8.737	7.371	1.4236	3.43967	3.5345	6.11575	0.600942	1.5261	2.0532	2.30938
487	0.901	1.978	0.773	1.291	1.96	3.072	4.816	2.281	1.969	1.922	4.316	6.248	4.464	4.005	8.962	7.294	1.3806	3.38967	3.61375	6.18125	0.570047	1.29701	2.08164	2.35625
488	0.9	1.872	0.935	1.24	1.791	2.676	4.979	2.312	1.973	1.905	4.467	6.199	4.427	3.991	8.885	7.222	1.3476	3.32233	3.636	6.13125	0.461996	1.44621	2.08338	2.32795
489	0.835	1.87	1.033	1.331	1.808	2.931	5.107	2.554	1.948	1.829	4.302	6.031	4.434	4.04	8.535	7.75	1.3754	3.53067	3.5275	6.18975	0.459079	1.3781	2.02049	2.28317
490	0.876	1.994	0.694	0.962	1.864	2.787	4.78	1.983	2.097	1.917	3.996	6.208	4.463	4.013	8.647	7.13	1.278	3.18333	3.5545	6.06325	0.603856	1.44	2.00347	2.20439
491	0.86	1.864	0.739	1.182	1.526	2.787	4.698	2.078	1.997	1.89	4.264	5.958	4.477	4.09	8.302	7.081	1.2342	3.18767	3.52725	5.9875	0.466307	1.35518	1.95564	2.03591
492	0.84	1.909	0.821	1.227	1.816	3.169	4.753	2.377	2.031	1.93	4.241	6.338	4.529	4.04	8.656	7.023	1.3226	3.433	3.635	6.062	0.519844	1.2098	2.0939	2.16725
493	0.884	1.921	0.64	0.85	1.491	2.934	4.797	2.265	2.095	1.963	4.023	6.116	4.536	4.069	8.524	6.899	1.1572	3.332	3.54925	6.007	0.531817	1.31208	1.95309	2.08572
494	0.835	1.939	0.766	1.182	1.736	2.973	4.597	2.373	2.092	1.925	4.062	6.241	4.587	4.096	8.364	6.933	1.2916	3.31433	3.58	5.995	0.527582	1.15062	2.02208	2.00671
495	0.925	1.944	0.715	1.037	1.779	3.049	4.891	2.2	2.106	1.978	4.113	6.099	4.573	4.088	8.71	7.261	1.28	3.38	3.574	6.158	0.546396	1.3757	1.94665	2.20049
496	0.869	1.949	0.675	1.097	1.851	2.763	4.79	2.298	2.136	1.996	4.307	6.264	4.595	4.142	8.51	6.974	1.2882	3.28367	3.67575	6.05525	0.579159	1.32508	2.02401	2.05449
497	0.906	1.968	0.787	1.032	1.591	2.961	4.645	2.394	2.145	1.995	4.391	6.473	4.634	4.198	8.596	6.87	1.2568	3.33333	3.751	6.0745	0.502942	1.17078	2.11988	2.04834
498	0.824	2.002	0.915	1.232	1.694	3.191	4.825	2.344	2.266	2.012	4.252	6.383	4.741	4.219	8.821	7.324	1.3334	3.45333	3.72825	6.27625	0.505442	1.26113	2.03353	2.17277
499	0.799	1.876	0.726	1.094	1.743	2.769	5.084	2.23	2.315	1.981	4.264	6.041	4.785	4.215	8.605	6.879	1.2476	3.361	3.65025	6.121	0.5332	1.5163	1.88518	2.0135
500	0.89	1.994	0.741	1.08	1.839	2.829	4.659	2.106	2.217	2.082	4.079	6.524	4.732	4.178	8.863	7.14	1.3088	3.198	3.7255	6.22825	0.570252	1.31589	2.07631	2.17681
501	0.851	1.927	0.728	0.94	1.788	2.663	4.479	2.249	2.274	2	4.23	6.709	4.763	4.206	9.087	7.197	1.2468	3.13033	3.80325	6.31325	0.564692	1.18618	2.17683	2.25968
502	0.847	1.976	0.826	1.143	1.882	2.794	4.705	2.506	2.243	1.973	4.139	6.29	4.724	4.15	9.122	7.202	1.3348	3.335	3.66125	6.2995	0.557714	1.19516	2.00002	2.30098
503	0.867	2.027	0.952	1.246	1.803	3.069	4.912	2.572	2.332	2.015	4.173	6.674	4.823	4.195	8.71	7.322	1.379	3.51767	3.7985	6.2625	0.515229	1.23283	2.14011	2.11814
504	0.93	1.993	0.953	1.087	2.092	2.869	4.64	2.423	2.421	2.023	4.277	6.379	4.845	4.199	8.596	7.425	1.411	3.31067	3.775	6.26625	0.580643	1.17264	1.99463	2.08678
505	0.853	1.908	0.66	1.125	1.525	2.78	4.447	2.229	2.369	2.026	4.057	6.686	4.778	4.266	8.59	6.697	1.2142	3.152	3.7845	6.08275	0.505845	1.15485	2.1283	1.97202
506	0.842	1.967	0.926	1.036	1.708	3.119	4.651	2.171	2.47	2.12	4.122	6.414	4.909	4.278	8.916	7.097	1.2958	3.31367	3.7815	6.3	0.507593	1.25141	1.96015	2.12148
507	0.856	2.002	0.964	1.232	1.546	3.003	4.874	2.532	2.435	2.037	4.146	6.611	4.918	4.243	9.031	6.88	1.32	3.46967	3.80725	6.268	0.465289	1.23878	2.08108	2.15498
508	0.892	2.026	0.626	1.32	1.718	2.618	4.575	2.014	2.491	1.996	4.017	6.305	4.939	4.226	8.615	6.726	1.3164	3.069	3.70225	6.1265	0.574803	1.33874	1.93665	1.96419
509	0.919	2.003	0.786	1.064	1.723	2.741	4.858	2.244	2.609	2.152	4.141	6.292	4.991	4.292	8.825	6.755	1.299	3.281	3.7985	6.21575	0.533429	1.38815	1.86733	2.02483
510	0.819	1.995	1.052	1.334	1.866	3.2	5.089	2.51	2.543	2.057	4.444	6.796	4.917	4.299	8.436	7.271	1.4132	3.59967	3.96	6.23075	0.508264	1.33514	2.15302	1.9496
511	0.96	2.067	0.743	1.228	1.723	2.827	4.809	2.343	2.57	2.148	4.618	6.656	5.002	4.292	8.492	6.634	1.3442	3.32633	3.998	6.105	0.545088	1.30663	2.07453	1.86915
512	0.891	1.978	0.889	0.99	1.643	2.903	4.624	2.486	2.615	2.166	4.174	6.694	5.01	4.354	9.237	6.874	1.2782	3.33767	3.91225	6.36875	0.501811	1.13334	2.04441	2.18994
513	0.899	1.992	0.558	0.669	1.651	2.789	4.518	1.863	2.678	2.044	3.904	6.403	5.048	4.332	8.221	7.161	1.1538	3.05667	3.75725	6.1905	0.633387	1.34759	1.9254	1.80962
514	0.903	2.049	1.004	1.004	1.964	2.869	4.768	1.998	2.671	2.215	4.061	6.511	5.032	4.418	8.619	6.831	1.3848	3.21167	3.8645	6.225	0.569821	1.41644	1.93114	1.89622
515	0.887	1.996	0.765	0.973	1.465	2.678	4.503	2.186	2.667	2.247	4.153	6.263	5.125	4.444	8.34	6.307	1.2172	3.12233	3.8325	6.054	0.510168	1.22074	1.81496	1.70733
516	0.896	2.058	0.733	1.127	1.839	2.987	4.741	2.498	2.797	2.223	4.401	7.112	5.155	4.415	8.643	7.005	1.3306	3.40867	4.13325	6.3045	0.58631	1.17946	2.18931	1.90183
517	0.913	2.079	0.894	1.206	2.141	3.16	5.176	2.339	2.857	2.283	4.74	7.213	5.143	4.495	8.669	7.026	1.4466	3.55833	4.27325	6.33325	0.618487	1.45984	2.22312	1.89134
518	0.851	2.021	0.582	0.868	1.909	2.93	4.655	2.236	2.911	2.252	4.145	6.931	5.207	4.516	8.8	6.88	1.2462	3.27367	4.05975	6.35075	0.667083	1.24558	2.06873	1.91079
519	0.891	2.137	0.775	1.098	1.892	3.206	4.853	2.245	2.919	2.344	4.343	6.941	5.192	4.496	8.363	7.098	1.3586	3.43467	4.13675	6.28725	0.615949	1.31895	2.04965	1.76769
520	0.869	2.097	1	1.075	2.01	3.048	4.973	2.374	2.964	2.263	4.534	7.095	5.213	4.498	8.853	6.955	1.4102	3.465	4.214	6.37975	0.592658	1.34875	2.14254	1.94509
521	0.869	2.062	0.515	0.914	1.828	3.043	4.578	2.28	3.07	2.392	4.285	6.875	5.323	4.586	8.517	6.663	1.2376	3.30033	4.1555	6.27225	0.66913	1.17041	1.9749	1.72589
522	0.897	2.126	0.653	1.17	1.73	3.028	4.885	2.578	3.126	2.349	4.504	7.04	5.362	4.591	9.075	6.641	1.3152	3.497	4.25475	6.41725	0.604967	1.22292	2.05959	1.9632
523	0.857	2.101	1.046	1.277	1.986	3.032	5.034	2.389	3.144	2.452	4.573	7.531	5.417	4.706	9.014	6.946	1.4534	3.485	4.425	6.52075	0.56032	1.37946	2.25114	1.90689
524	0.883	2.169	0.854	1.253	1.888	3.247	5.013	2.539	3.185	2.462	4.671	7.242	5.377	4.748	8.951	6.917	1.4094	3.59967	4.39	6.49825	0.594995	1.27415	2.11203	1.87189
525	0.894	2.099	0.769	0.943	1.604	3.126	4.615	2.258	3.245	2.426	4.416	7.253	5.41	4.763	8.841	6.748	1.2618	3.333	4.335	6.4405	0.569598	1.19206	2.10979	1.80119
526	0.845	2.194	0.897	1.061	1.876	3.385	4.822	2.461	3.252	2.544	4.602	7.896	5.488	4.79	9.132	7.027	1.3746	3.556	4.5735	6.60925	0.618414	1.18975	2.37382	1.92403
527	0.9	2.19	0.859	1.181	1.864	3.299	5.143	2.284	3.293	2.441	4.548	7.505	5.433	4.641	9.027	6.46	1.3988	3.57533	4.44675	6.39025	0.597919	1.44939	2.2149	1.90906
528	0.871	2.17	0.695	1.099	1.815	3.236	5.05	2.313	3.348	2.503	4.656	7.498	5.465	4.563	8.908	6.741	1.33	3.533	4.50125	6.41925	0.634053	1.39246	2.18536	1.88447
529	0.964	2.207	0.9	1.264	1.961	3.258	4.811	2.497	3.413	2.491	4.779	7.287	5.499	4.658	8.862	6.751	1.4592	3.522	4.4925	6.4425	0.593093	1.17937	2.08667	1.82791
530	0.934	2.235	0.795	1.104	1.778	3.158	5.124	2.363	3.366	2.49	4.495	7.101	5.424	4.637	9.232	6.792	1.3692	3.54833	4.363	6.52125	0.613629	1.42128	2.00135	2.0146
531	0.899	2.186	0.769	1.335	1.9	3.371	4.954	2.217	3.484	2.524	4.445	7.499	5.511	4.664	8.653	6.798	1.4178	3.514	4.488	6.4065	0.61636	1.37409	2.15509	1.73573
532	0.99	2.24	0.593	1.187	1.747	3.09	4.948	2.463	3.389	2.431	4.053	7.535	5.403	4.643	8.554	6.617	1.3514	3.50033	4.352	6.30425	0.647865	1.29232	2.224	1.70599
533	0.96	2.276	0.793	1.173	1.825	3.107	5.106	2.521	3.54	2.586	4.433	7.312	5.478	4.706	8.431	6.91	1.4054	3.578	4.46775	6.38125	0.624787	1.35534	2.04064	1.64351
534	0.921	2.227	0.903	1.247	1.892	3.247	4.838	2.559	3.546	2.65	4.387	7.494	5.566	4.692	9.225	6.838	1.438	3.548	4.51925	6.58025	0.595532	1.16894	2.10618	1.97107
535	0.892	2.259	0.764	1.062	1.845	3.194	4.792	2.262	3.677	2.67	4.573	7.381	5.563	4.815	8.849	6.696	1.3644	3.416	4.57525	6.48075	0.653141	1.27953	2.02559	1.75802
536	0.939	2.308	0.81	1.064	1.911	3.305	4.906	2.439	3.81	2.716	4.652	7.505	5.678	4.793	8.814	6.789	1.4064	3.55	4.67075	6.5185	0.663117	1.25162	2.049	1.73458
537	0.868	2.311	0.849	1.145	1.842	3.217	4.858	2.262	3.792	2.725	4.686	7.865	5.733	4.794	9.02	6.824	1.403	3.44567	4.767	6.59275	0.647474	1.31302	2.21544	1.8184
538	0.936	2.41	0.675	1.33	2.026	3.48	5.079	2.254	3.811	2.773	4.778	7.822	5.571	4.898	9.027	6.69	1.4754	3.60433	4.796	6.5465	0.729618	1.4166	2.17714	1.81132
539	0.954	2.355	1.018	0.961	1.671	3.399	5.023	2.483	3.775	2.686	4.497	7.587	5.494	4.861	9.418	6.534	1.3918	3.635	4.63625	6.57675	0.616987	1.28634	2.10329	2.01583
540	1.026	2.376	1.026	1.246	1.966	3.371	4.592	2.443	3.801	2.677	4.714	7.34	5.55	4.735	8.964	6.742	1.528	3.46867	4.633	6.49775	0.611245	1.07782	1.98768	1.83916
541	0.967	2.417	0.837	1.14	1.698	3.239	4.803	2.511	3.988	2.776	4.646	7.703	5.676	4.769	8.697	6.55	1.4118	3.51767	4.77825	6.423	0.650856	1.17114	2.09803	1.68136
542	1.007	2.475	0.58	1.098	1.703	3.159	4.492	2.32	3.966	2.712	4.332	8.083	5.627	4.811	8.713	6.602	1.3726	3.32367	4.77325	6.43825	0.735142	1.09532	2.31297	1.68398
543	1.043	2.519	0.859	1.246	1.948	3.569	4.815	2.202	4.027	2.895	4.682	7.743	5.642	4.859	8.977	6.376	1.523	3.52867	4.83675	6.4635	0.69294	1.30697	2.07335	1.78649
544	1.063	2.596	0.423	1.342	1.596	3.083	4.764	2.152	4.065	2.854	4.401	7.715	5.718	4.725	8.863	6.312	1.404	3.333	4.75875	6.4045	0.796902	1.32382	2.0798	1.76492
545	0.989	2.539	0.835	1.318	1.875	3.52	4.898	2.782	4.087	2.869	4.971	8.007	5.589	4.906	9.253	6.567	1.5112	3.73333	4.9835	6.57875	0.699283	1.07401	2.19215	1.9087
546	0.986	2.516	1.053	1.545	2.353	3.617	5.045	2.727	4.253	2.921	5.01	7.866	5.774	4.823	9.083	6.18	1.6906	3.79633	5.0125	6.465	0.714887	1.16936	2.08915	1.83565
547	1.028	2.606	0.787	0.93	2.004	3.495	4.76	2.219	4.268	2.856	5.082	7.861	5.742	4.81	9.531	6.12	1.471	3.49133	5.01675	6.55075	0.795157	1.2705	2.10741	2.06169
548	1.091	2.609	0.84	1.074	1.937	3.431	5.124	2.428	4.196	2.91	4.855	8.065	5.77	4.937	8.987	6.396	1.5102	3.661	5.0065	6.5225	0.742409	1.36264	2.19314	1.74832
549	1.054	2.681	0.906	1.159	1.916	3.579	5.105	2.547	4.326	2.951	5.174	8.26	5.804	4.849	8.982	6.505	1.5432	3.74367	5.17775	6.535	0.746076	1.28693	2.24975	1.76689
550	1.083	2.615	0.996	1.344	1.796	3.418	5.191	2.607	4.273	2.977	5.063	8.435	5.74	4.958	9.246	6.755	1.5668	3.73867	5.187	6.67475	0.66347	1.32151	2.32983	1.86536
551	1.094	2.773	0.479	0.969	1.904	3.033	5.074	2.394	4.421	3.019	4.583	8.118	5.841	5.041	8.859	6.453	1.4438	3.50033	5.03525	6.5485	0.902384	1.39979	2.17182	1.64526
552	1.115	2.714	0.768	0.98	1.804	3.385	4.343	2.004	4.443	3.029	4.822	7.94	5.797	4.964	8.63	6.236	1.4762	3.244	5.0585	6.40675	0.793383	1.17586	2.07016	1.57325
553	1.121	2.749	0.869	0.992	2.173	3.511	4.569	2.586	4.503	3.034	4.87	8.514	5.758	5.004	9.473	6.631	1.5808	3.55533	5.23025	6.7165	0.83369	0.992243	2.32846	1.95422
554	1.16	2.856	0.791	1.264	1.704	3.352	4.88	2.396	4.633	3.121	4.891	8.046	5.843	4.977	8.332	6.111	1.555	3.54267	5.17275	6.31575	0.796744	1.25293	2.06849	1.42863
555	1.128	2.807	0.981	1.429	1.876	3.566	5.082	2.694	4.63	3.173	5.202	8.212	5.876	5.042	9.215	6.51	1.6442	3.78067	5.30425	6.66075	0.734582	1.20839	2.11836	1.80583
556	1.23	2.924	0.84	1.211	2.225	3.141	5.137	2.4	4.672	3.156	5.116	7.832	5.951	5.146	9.151	6.468	1.686	3.55933	5.194	6.679	0.862039	1.41564	1.94859	1.73545
557	1.199	2.921	0.79	1.233	2.12	3.71	5.289	2.401	4.657	3.208	5.235	8.502	5.894	5.017	8.87	6.555	1.6526	3.8	5.4005	6.584	0.859243	1.4461	2.23656	1.64906
558	1.231	3.032	0.712	1.058	1.867	3.626	5.062	2.666	4.783	3.258	5.288	8.504	5.887	5.039	8.904	6.562	1.58	3.78467	5.45825	6.598	0.913562	1.20585	2.20625	1.65881
559	1.257	2.98	0.972	1.431	2.04	3.674	5.051	2.552	4.816	3.324	5.361	8.511	5.94	5.204	9.045	6.557	1.736	3.759	5.503	6.6865	0.797827	1.25167	2.18237	1.66677
560	1.327	3.119	0.843	1.201	1.833	3.749	5.182	2.401	4.859	3.354	5.14	8.088	5.986	5.147	9.1	6.003	1.6646	3.77733	5.36025	6.559	0.887069	1.39072	1.98036	1.74049
561	1.326	3.075	1.012	1.407	1.961	3.272	5.179	2.451	4.833	3.253	5.222	8.387	5.946	5.077	9.42	6.767	1.7562	3.634	5.42375	6.8025	0.812715	1.39956	2.15118	1.87648
562	1.362	3.164	0.869	1.282	1.893	3.247	4.995	2.679	5.008	3.453	5.171	8.512	6.017	5.153	9.174	6.433	1.714	3.64033	5.536	6.69425	0.888692	1.20706	2.12975	1.737
563	1.348	3.244	1.04	1.441	2.296	3.614	5.457	2.471	5.033	3.422	5.271	8.741	5.899	5.119	8.906	6.352	1.8738	3.84733	5.61675	6.569	0.89648	1.50661	2.23891	1.63911
564	1.366	3.179	1.112	1.277	1.977	3.635	5.149	2.595	5.049	3.453	5.469	8.465	6.003	5.205	9.258	6.148	1.7822	3.793	5.609	6.6535	0.846554	1.28431	2.09271	1.78515
565	1.508	3.376	1.246	1.716	2.308	3.891	5.433	2.665	5.099	3.448	5.617	8.977	6.062	5.181	8.967	6.771	2.0308	3.99633	5.78525	6.74525	0.847752	1.387	2.32015	1.61767
566	1.439	3.283	0.907	1.175	2.103	3.958	5.576	2.463	5.088	3.46	5.401	9.081	6.063	5.202	9.276	6.442	1.7814	3.999	5.7575	6.74575	0.949706	1.5569	2.37343	1.76482
567	1.469	3.455	0.822	1.303	2.175	3.418	5.171	2.425	5.187	3.506	5.262	8.328	6.077	5.145	9.02	6.404	1.8448	3.67133	5.57075	6.6615	1.02258	1.39042	2.009	1.66035
568	1.56	3.493	0.868	1.473	2.239	3.622	5.246	2.643	5.324	3.571	5.841	8.827	6.059	5.216	9.049	6.396	1.9266	3.837	5.89075	6.68	1.0015	1.31475	2.18529	1.65547
569	1.544	3.464	1.061	1.301	2.232	3.833	5.514	2.842	5.299	3.578	5.624	8.577	6.103	5.209	9.197	6.185	1.9204	4.063	5.7695	6.6735	0.967432	1.35077	2.07583	1.73944
570	1.576	3.583	1.004	1.476	2.439	3.774	5.541	2.801	5.329	3.627	5.842	8.934	6.047	5.211	9.476	6.585	2.0156	4.03867	5.933	6.82975	1.01781	1.38904	2.21335	1.85253
571	1.637	3.636	0.896	1.27	2.275	3.752	5.367	2.59	5.449	3.655	5.426	8.745	6.114	5.252	9.149	6.52	1.9428	3.903	5.81875	6.75875	1.07462	1.39464	2.12412	1.67892
572	1.637	3.627	0.842	1.03	2.298	3.626	5.587	2.546	5.385	3.706	5.785	8.876	6.119	5.248	9.718	6.201	1.8868	3.91967	5.938	6.8215	1.12755	1.54162	2.15584	1.97856
573	1.65	3.799	0.953	1.385	2.396	3.85	4.851	2.651	5.494	3.716	5.499	8.711	6.101	5.273	9.025	6.089	2.0366	3.784	5.855	6.622	1.11618	1.10148	2.08079	1.64821
574	1.735	3.799	1.135	1.438	2.005	3.903	5.42	2.72	5.446	3.714	5.86	8.805	6.104	5.3	9.685	6.046	2.0224	4.01433	5.95625	6.78375	1.04501	1.35344	2.11445	1.96851
575	1.7	3.898	1.088	1.293	2.195	3.596	5.301	2.773	5.465	3.711	5.585	8.975	6.124	5.304	9.445	6.114	2.0348	3.89	5.934	6.74675	1.12427	1.28939	2.20085	1.83941
576	1.798	3.98	1.029	1.447	2.641	3.884	5.477	2.583	5.561	3.808	5.749	8.778	6.253	5.336	9.39	6.166	2.179	3.98133	5.974	6.78625	1.16839	1.44945	2.06359	1.78436
577	1.789	3.924	1.112	1.561	2.575	3.97	5.384	2.604	5.702	3.706	6.086	9.266	6.192	5.33	9.324	6.242	2.1922	3.986	6.19	6.772	1.1038	1.39007	2.3008	1.75208
578	1.943	4.073	0.886	1.291	2.302	3.689	5.673	2.678	5.736	3.898	5.712	8.746	6.248	5.367	9.112	5.914	2.099	4.01333	6.023	6.66025	1.23354	1.52361	2.0091	1.67436
579	1.949	4.135	1.11	1.573	2.316	4.034	5.482	2.992	5.732	3.863	6.254	8.879	6.233	5.335	9.284	6.09	2.2166	4.16933	6.182	6.7355	1.16195	1.2505	2.07037	1.74408
580	2.01	4.231	1.127	1.657	2.573	3.931	5.377	2.871	5.789	3.876	6.254	9.058	6.288	5.365	9.433	5.887	2.3196	4.05967	6.24425	6.74325	1.1911	1.25794	2.13956	1.83255
581	2.092	4.295	1.13	1.494	2.633	3.696	5.495	2.738	5.77	3.926	6.204	9.153	6.274	5.411	9.67	6.022	2.3288	3.97633	6.26325	6.84425	1.23982	1.39972	2.16489	1.91836
582	2.081	4.489	0.986	1.828	2.919	3.885	5.751	2.488	5.845	3.885	6.249	8.986	6.231	5.434	9.531	6.316	2.4606	4.04133	6.24125	6.878	1.32696	1.63711	2.101	1.81273
583	2.168	4.534	1.329	1.743	2.813	3.757	5.442	2.707	5.956	4.008	6.348	9.401	6.283	5.486	9.642	6.328	2.5174	3.96867	6.42825	6.93475	1.25381	1.37973	2.23042	1.84581
584	2.328	4.707	1.281	1.859	3.121	3.738	5.711	2.874	5.887	4.052	6.043	9.325	6.279	5.504	9.43	6.489	2.6592	4.10767	6.32675	6.9255	1.32817	1.45418	2.19377	1.72256
585	2.438	4.792	1.213	1.941	3.135	4.028	5.891	2.989	5.957	3.984	6.619	9.326	6.208	5.458	9.753	6.163	2.7038	4.30267	6.4715	6.8955	1.36212	1.47037	2.20774	1.93571
586	2.455	4.911	1.289	1.896	2.838	3.81	5.715	2.858	6.015	3.992	6.783	9.42	6.308	5.549	9.911	6.245	2.6778	4.12767	6.5525	7.00325	1.37863	1.45475	2.24505	1.96877
587	2.616	5.061	1.343	2.034	3.435	4.087	6.062	3.065	6.041	4.079	6.811	9.409	6.33	5.509	9.906	6.14	2.8978	4.40467	6.585	6.97125	1.43274	1.52354	2.20621	1.98772
588	2.764	5.23	1.4	2.109	3.624	4.056	5.935	2.953	6.131	4.076	6.529	9.233	6.335	5.421	9.597	6.174	3.0254	4.31467	6.49225	6.88175	1.48059	1.50773	2.11989	1.85348
589	2.88	5.376	1.596	2.096	3.557	4.086	5.692	3.029	6.142	4.131	7.038	9.739	6.313	5.63	9.845	6.278	3.101	4.269	6.7625	7.0165	1.47542	1.3409	2.32703	1.91164
590	2.946	5.476	1.786	2.464	3.81	4.46	6.245	3.266	6.223	4.165	7.191	9.626	6.369	5.479	10.17	6.322	3.2964	4.657	6.80125	7.085	1.42403	1.49924	2.26681	2.09693
591	3.115	5.789	1.479	2.271	3.55	4.198	5.773	2.624	6.179	4.114	6.794	9.485	6.38	5.503	9.885	6.317	3.2408	4.19833	6.643	7.02125	1.63166	1.5745	2.21442	1.9505
592	3.346	5.948	1.715	2.341	3.612	3.892	5.655	2.938	6.325	4.133	6.849	9.855	6.427	5.561	9.585	6.396	3.3924	4.16167	6.7905	6.99225	1.62023	1.37843	2.35751	1.77443
593	3.558	6.249	1.676	2.688	4.277	4.306	6.088	2.977	6.265	4.245	6.926	9.633	6.329	5.491	9.566	6.56	3.6896	4.457	6.76725	6.9865	1.72993	1.56099	2.22499	1.77994
594	3.667	6.378	1.781	2.62	4.248	3.858	5.83	2.905	6.231	4.217	6.744	9.468	6.391	5.543	10.059	5.992	3.7388	4.19767	6.665	6.99625	1.7546	1.49179	2.16365	2.07101
595	3.905	6.582	1.871	2.854	4.296	4.2	6.301	3.16	6.275	4.269	7.036	9.766	6.412	5.485	9.928	6.119	3.9016	4.55367	6.8365	6.986	1.77207	1.60009	2.27516	1.99913
596	4.069	6.813	1.95	2.674	4.73	4.199	6.313	2.877	6.305	4.142	7.221	9.673	6.385	5.571	9.779	6.111	4.0472	4.463	6.83525	6.9615	1.89738	1.73315	2.2903	1.90853
597	4.47	7.223	2.118	2.776	4.737	4.129	5.983	2.707	6.393	4.254	7.228	9.651	6.393	5.603	9.818	5.787	4.2648	4.273	6.8815	6.90025	1.99006	1.64274	2.23104	1.97423
598	4.752	7.476	2.16	3.178	4.58	4.186	6.135	2.88	6.469	4.276	7.268	9.4	6.41	5.561	9.87	6.126	4.4292	4.40033	6.85325	6.99175	2.00778	1.63805	2.11722	1.95101
599	4.907	7.737	2.654	3.673	5.125	4.173	6.615	3.048	6.42	4.297	7.528	9.634	6.382	5.548	10.095	6.153	4.8192	4.612	6.96975	7.0445	1.91159	1.82357	2.22529	2.06388
600	5.281	8.107	2.076	3.428	5.262	4.21	6.382	2.974	6.401	4.214	7.28	9.675	6.397	5.542	10.08	6.025	4.8308	4.522	6.8925	7.011	2.2737	1.72529	2.25894	2.07573
601	5.696	8.594	2.604	3.756	5.466	4.333	6.783	3.093	6.536	4.336	7.474	9.78	6.483	5.573	9.924	6.11	5.2232	4.73633	7.0315	7.0225	2.27254	1.87777	2.25546	1.97007
602	6.053	8.944	2.785	4.125	5.886	4.173	6.863	2.91	6.526	4.325	7.801	10.031	6.433	5.592	10.232	6.202	5.5586	4.64867	7.17075	7.11475	2.32167	2.01897	2.38693	2.10823
603	6.34	9.279	3.14	4.414	5.965	4.222	6.568	3.14	6.524	4.365	7.65	9.957	6.384	5.62	10.139	5.965	5.8276	4.64333	7.124	7.027	2.31382	1.75241	2.32914	2.09805
604	6.704	9.665	3.298	4.658	5.97	4.373	6.654	3.099	6.54	4.353	7.376	9.924	6.462	5.544	9.781	6.169	6.059	4.70867	7.04825	6.989	2.3986	1.80111	2.30218	1.9003
605	7.252	10.238	3.61	4.971	6.371	4.276	6.571	3.21	6.589	4.375	7.714	9.99	6.391	5.58	10.19	5.886	6.4884	4.68567	7.167	7.01175	2.51217	1.71754	2.33794	2.14506
606	7.669	10.568	3.75	4.865	6.653	4.221	6.855	3.404	6.652	4.419	7.682	10.124	6.476	5.669	10.384	6.269	6.701	4.82667	7.21925	7.1995	2.64444	1.80346	2.36748	2.15041
607	8.144	11.09	4.073	5.507	7.036	4.283	6.845	3.27	6.676	4.348	7.725	10.076	6.396	5.609	10.019	6.08	7.17	4.79933	7.20625	7.026	2.67815	1.84258	2.37735	2.02137
608	8.568	11.434	4.297	5.091	7.414	4.401	7.131	3.098	6.694	4.44	7.83	9.813	6.429	5.629	10.247	6.016	7.3608	4.87667	7.19425	7.08025	2.85438	2.05815	2.24337	2.13629
609	9.283	12.272	4.783	5.958	7.823	4.461	7.151	3.362	6.684	4.526	7.814	9.831	6.476	5.637	10.21	6.242	8.0238	4.99133	7.21375	7.14125	2.93443	1.94938	2.21472	2.07615
610	9.692	12.738	4.937	6.233	7.831	4.389	7.103	3.14	6.667	4.548	7.879	9.78	6.451	5.691	10.13	6.271	8.2862	4.87733	7.2185	7.13575	3.0592	2.02613	2.19342	2.02233
611	10.144	13.157	5.106	6.045	7.969	4.214	7.162	2.844	6.744	4.471	7.8	10.212	6.513	5.731	10.071	6.167	8.4842	4.74	7.30675	7.1205	3.24874	2.20653	2.38341	1.99285
612	10.683	13.783	5.368	6.68	8.535	4.328	6.895	2.895	6.705	4.494	8.085	10.371	6.502	5.595	10.165	5.977	9.0098	4.706	7.41375	7.05975	3.33538	2.02661	2.46463	2.10329
613	11.409	14.474	5.539	7.228	8.927	4.256	6.87	3.048	6.823	4.513	7.719	10.314	6.495	5.685	10.107	5.926	9.5154	4.72467	7.34225	7.05325	3.52007	1.95363	2.39774	2.06396
614	11.94	14.938	6.325	7.177	8.862	4.507	7.233	3.229	6.828	4.587	7.82	10.235	6.535	5.7	10.074	6.192	9.8484	4.98967	7.3675	7.12525	3.56379	2.04517	2.34162	1.99548
615	12.433	15.547	6.439	7.836	9.479	4.302	7.636	3.305	6.76	4.52	8.814	10.01	6.471	5.61	10.523	6.097	10.3468	5.081	7.526	7.17525	3.66478	2.26815	2.41191	2.2595
616	13.025	16.029	6.771	7.484	9.395	4.374	7.018	3.138	6.8	4.531	8.292	10.232	6.583	5.767	9.994	6.333	10.5408	4.84333	7.46375	7.16925	3.91024	1.98212	2.40768	1.91385
617	13.762	16.957	7.18	8.126	9.558	4.325	7.18	3.141	6.872	4.565	8.087	10.465	6.546	5.686	10.398	5.958	11.1166	4.882	7.49725	7.147	4.12244	2.07631	2.45929	2.19685
618	14.458	17.5	7.55	8.691	10.169	4.451	7.703	3.166	6.858	4.566	8.164	10.485	6.512	5.724	10.217	6.12	11.6736	5.10667	7.51825	7.14325	4.17922	2.33849	2.47456	2.07427
619	15.025	18.036	8.22	8.824	10.414	4.656	7.559	3.459	6.939	4.57	8.68	10.596	6.578	5.748	10.625	6.112	12.1038	5.22467	7.69625	7.26575	4.25502	2.10833	2.56406	2.26512
620	15.485	18.492	8.629	9.427	10.605	4.694	7.659	3.45	6.889	4.582	8.572	10.007	6.565	5.68	10.615	6.491	12.5276	5.26767	7.5125	7.33775	4.26701	2.16235	2.3325	2.22131
621	16.344	19.293	8.938	9.512	11.237	4.608	7.711	3.458	6.94	4.63	8.602	10.384	6.552	5.71	10.432	6.15	13.0648	5.259	7.639	7.211	4.5425	2.19997	2.44984	2.17469
622	16.994	19.96	9.336	9.955	11.195	4.59	7.428	3.283	7.066	4.676	8.328	10.546	6.671	5.757	10.343	6.314	13.488	5.10033	7.654	7.27125	4.72117	2.1191	2.45168	2.08208
623	17.505	20.427	9.687	9.928	11.16	4.42	7.771	3.235	7.039	4.654	8.57	10.438	6.549	5.707	10.197	6.057	13.7414	5.142	7.67525	7.1275	4.91187	2.35261	2.44718	2.07527
624	17.938	21.036	9.796	10.796	11.748	4.592	8.058	3.262	7.089	4.743	8.612	10.165	6.593	5.838	10.33	6.233	14.2628	5.304	7.65225	7.2485	4.94162	2.47601	2.31056	2.07734
625	18.63	21.447	10.43	10.853	11.816	4.362	7.637	3.544	7.106	4.782	8.503	10.805	6.733	5.816	10.391	5.923	14.6352	5.181	7.799	7.21575	5.05707	2.16593	2.52416	2.15606
626	19.308	22.286	10.868	10.907	12.125	4.448	7.842	3.23	7.029	4.727	8.673	10.172	6.608	5.717	10.482	6.285	15.0988	5.17333	7.65025	7.273	5.33122	2.39002	2.33357	2.17081
627	19.827	22.733	11.01	10.961	12.367	4.691	7.889	3.654	7.23	4.728	8.383	10.69	6.66	5.796	10.283	6.038	15.3796	5.41133	7.75775	7.19425	5.51237	2.20748	2.47971	2.09108
628	20.344	23.137	11.506	11.829	12.447	4.846	8.014	3.59	7.213	4.759	8.749	10.888	6.619	5.767	10.476	5.915	15.8526	5.48333	7.90225	7.19425	5.4753	2.27982	2.58114	2.21918
629	20.911	23.735	11.519	11.984	12.419	4.575	8.086	3.53	7.154	4.699	8.618	10.659	6.693	5.789	10.378	5.919	16.1136	5.397	7.7825	7.19475	5.76443	2.38664	2.50834	2.15936
630	21.641	24.475	12.135	12.516	12.467	4.819	7.96	3.336	7.246	4.892	8.702	10.672	6.72	5.86	10.555	5.599	16.6468	5.37167	7.878	7.1835	5.93956	2.36102	2.43591	2.29813
631	22.243	25.045	12.534	12.25	13.171	4.577	8.075	3.371	7.383	4.947	8.771	10.917	6.793	5.819	10.241	5.694	17.0486	5.341	8.0045	7.13675	6.11081	2.44329	2.50365	2.12701
632	22.559	25.299	12.639	12.727	13.118	4.751	8.074	3.363	7.384	4.878	8.886	10.626	6.808	5.832	10.303	5.67	17.2684	5.396	7.9435	7.15325	6.1596	2.42083	2.43546	2.15916
633	23.09	25.666	12.845	12.914	13.073	4.79	8.006	3.553	7.47	4.952	8.738	10.717	6.772	5.921	10.599	6.027	17.5176	5.44967	7.96925	7.32975	6.32908	2.29862	2.41483	2.21215
634	23.925	26.43	13.574	13.27	13.476	5.228	8.386	3.59	7.473	4.985	8.768	10.592	6.787	5.932	10.553	6.267	18.135	5.73467	7.9545	7.38475	6.49054	2.43781	2.35711	2.14126
635	24.284	26.731	13.668	13.501	13.874	4.677	8.422	3.902	7.595	5.03	8.638	10.472	6.836	6.026	10.854	6.275	18.4116	5.667	7.93375	7.49775	6.53649	2.41716	2.27194	2.263
636	24.78	27.113	14.364	13.372	14.036	4.652	8.67	3.829	7.545	5.025	8.779	10.941	6.817	5.956	10.346	6.071	18.733	5.717	8.0725	7.2975	6.64607	2.59027	2.46934	2.06786
637	25.117	27.491	14.08	14.159	13.685	5.302	8.314	3.466	7.597	5.076	8.699	10.97	6.882	5.989	10.802	5.875	18.9064	5.694	8.0855	7.387	6.80738	2.44766	2.44898	2.32076
638	25.789	27.996	14.595	14.18	14.101	4.631	8.104	3.473	7.623	5.104	8.866	10.746	6.888	5.989	10.934	5.719	19.3322	5.40267	8.08475	7.3825	6.94808	2.41001	2.36578	2.41983
639	26.287	28.441	15.041	14.405	14.008	4.808	8.106	4.073	7.795	5.136	9.04	11.007	6.881	5.966	10.64	6.04	19.6364	5.66233	8.2445	7.38175	7.10485	2.14795	2.45825	2.21145
640	26.539	28.642	15.112	14.458	14.171	5.133	8.612	3.528	7.781	5.21	9.058	11.218	6.911	6.001	10.584	5.797	19.7844	5.75767	8.31675	7.32325	7.17276	2.59893	2.51035	2.22712
641	26.818	29.031	15.284	14.395	14.082	4.879	8.587	3.718	7.796	5.208	8.859	11.415	6.986	6.051	10.334	5.657	19.922	5.728	8.3195	7.257	7.36025	2.54311	2.57091	2.1257
642	27.414	29.409	15.274	14.148	14.606	4.945	8.694	3.679	7.868	5.264	9.133	11.196	7.074	6.107	10.658	6.132	20.1702	5.77267	8.36525	7.49275	7.56684	2.60794	2.4811	2.15763
643	27.843	29.853	15.978	15.495	14.439	5.38	8.678	3.791	7.96	5.298	8.989	11.041	6.968	6.048	10.82	6.164	20.7216	5.94967	8.322	7.5	7.47307	2.49281	2.38841	2.25082
644	28.048	30.043	16.348	15.096	14.76	5.568	8.744	4.061	8.044	5.405	9.192	10.841	7.102	6.243	11.055	6.169	20.859	6.12433	8.3705	7.64225	7.52972	2.39055	2.28612	2.31424
645	28.524	30.302	16.122	15.404	15.293	5.381	8.84	3.894	8.063	5.342	9.325	11.126	7.082	6.122	11.035	6.069	21.129	6.03833	8.464	7.577	7.59497	2.53767	2.43141	2.35187
646	28.938	30.761	16.116	15.42	14.674	5.09	8.254	3.82	8.124	5.455	9.282	11.369	7.063	6.124	11.298	5.956	21.1818	5.72133	8.5575	7.61025	7.95506	2.28342	2.46596	2.50629
647	29.314	30.912	15.946	15.722	14.869	5.099	8.531	3.626	8.275	5.487	8.877	11.162	7.121	6.159	10.715	5.749	21.3526	5.752	8.45025	7.436	8.02711	2.51686	2.33433	2.26037
648	29.587	31.154	16.511	16.142	15.28	5.254	9.102	3.869	8.292	5.486	9.502	11.483	7.158	6.142	11.011	5.757	21.7348	6.075	8.69075	7.517	7.91534	2.71138	2.50893	2.40313
649	30.017	31.466	16.798	16.102	15.417	5.483	8.808	3.98	8.307	5.56	9.494	11.355	7.184	6.208	10.997	6.087	21.96	6.09033	8.679	7.619	8.04755	2.47063	2.42843	2.30493
650	30.247	31.582	17.043	16.021	15.469	5.276	8.077	3.844	8.395	5.675	9.13	11.205	7.252	6.33	11.072	5.797	22.0724	5.73233	8.60125	7.61275	8.10518	2.15308	2.28507	2.3832
651	30.609	31.913	17.592	16.102	14.959	5.327	9.102	4.388	8.472	5.727	9.551	11.286	7.223	6.318	11.265	5.929	22.235	6.27233	8.759	7.68375	8.3051	2.49513	2.33012	2.44827
652	30.817	32.022	17.163	16.408	15.684	5.252	8.892	3.805	8.52	5.709	8.943	11.704	7.373	6.349	10.846	5.645	22.4188	5.983	8.719	7.55325	8.24412	2.6211	2.45358	2.30697
653	31.214	32.384	17.92	16.277	15.736	4.784	8.508	3.911	8.609	5.818	9.6	11.378	7.279	6.418	11.232	5.876	22.7062	5.73433	8.85125	7.70125	8.34968	2.4414	2.3241	2.42369
654	31.566	32.468	17.59	16.515	14.978	5.43	8.114	3.811	8.772	5.768	9.108	11.167	7.377	6.371	10.87	5.983	22.6234	5.785	8.70375	7.65025	8.63114	2.17335	2.22518	2.22543
655	31.564	32.499	17.52	16.88	15.157	5.446	8.204	3.762	8.791	5.895	9.277	11.168	7.358	6.472	11.138	5.909	22.724	5.804	8.78275	7.71925	8.54678	2.24254	2.1812	2.35591
656	31.913	32.759	17.977	16.904	15.377	5.716	8.771	4.542	8.819	5.901	9.165	11.573	7.43	6.386	11.462	5.989	22.986	6.343	8.8645	7.81675	8.59041	2.18311	2.32456	2.505
657	32.386	33.09	17.987	16.606	15.495	5.421	8.391	4.04	8.948	6.099	9.596	11.413	7.432	6.477	11.175	5.639	23.1128	5.95067	9.014	7.68075	8.83431	2.22333	2.20571	2.44195
658	32.501	33.196	17.833	16.94	15.931	5.433	8.522	4.161	8.998	6.052	9.657	11.402	7.503	6.574	11.591	5.58	23.2802	6.03867	9.02725	7.812	8.76395	2.2427	2.22778	2.63886
659	32.745	33.333	18.111	17.731	15.989	5.625	8.908	4.169	9.058	6.21	9.098	11.546	7.475	6.36	11.525	5.741	23.5818	6.234	8.978	7.77525	8.67269	2.42749	2.18153	2.60076
660	33.064	33.465	18.193	17.867	15.617	5.931	9.118	4.217	9.154	6.18	10.327	12.052	7.494	6.581	12.052	5.868	23.6412	6.422	9.42825	7.99875	8.84178	2.48712	2.47104	2.78291
661	33.383	33.759	18.269	17.405	15.152	5.686	8.971	4.296	9.316	6.352	9.54	11.551	7.602	6.701	11.488	5.675	23.5936	6.31767	9.18975	7.8665	9.17985	2.40066	2.14219	2.53944
662	33.616	33.774	18.324	17.538	16.295	5.439	8.87	4.207	9.35	6.298	9.38	11.77	7.518	6.543	11.462	5.959	23.9094	6.172	9.1995	7.8705	8.96241	2.41637	2.24213	2.47919
663	33.741	33.832	18.175	17.287	15.86	5.678	8.458	3.87	9.496	6.375	9.484	11.63	7.648	6.696	11.176	5.445	23.779	6.002	9.24625	7.74125	9.17286	2.3111	2.16373	2.46113
664	34	34.022	18.31	18.31	15.727	5.628	8.962	4.202	9.541	6.448	9.305	11.867	7.681	6.646	11.814	5.789	24.0738	6.264	9.29025	7.9825	9.13247	2.4429	2.21969	2.66889
665	34.443	34.229	18.226	17.658	16.235	6.207	8.647	4.441	9.681	6.523	9.632	11.612	7.687	6.72	11.569	6.047	24.1582	6.43167	9.362	8.00575	9.31959	2.11198	2.10532	2.46902
666	34.555	34.239	18.242	18.039	15.81	5.643	9.132	4.128	9.729	6.626	9.398	11.425	7.781	6.778	11.959	5.771	24.177	6.301	9.2945	8.07225	9.37887	2.56607	1.98825	2.71799
667	34.819	34.415	19.007	17.638	15.731	5.754	8.868	4.094	9.737	6.604	9.234	12.219	7.709	6.785	12.046	5.603	24.322	6.23867	9.4485	8.03575	9.47082	2.42362	2.30189	2.809
668	34.868	34.54	18.875	18.15	16.019	5.733	9.292	4.337	9.884	6.71	9.519	12.461	7.817	6.881	11.833	6.068	24.4904	6.454	9.6435	8.14975	9.38332	2.55497	2.35351	2.55737
669	35.274	34.726	18.619	17.716	16.096	5.612	8.842	4.557	9.979	6.754	9.614	11.746	7.843	6.865	11.441	5.721	24.4862	6.337	9.52325	7.9675	9.64216	2.2326	2.06763	2.47272
670	35.478	34.734	18.596	18.4	16.233	5.901	8.873	4.126	10.078	6.856	9.33	11.976	7.801	6.88	11.671	5.498	24.6882	6.3	9.56	7.9625	9.55883	2.39852	2.11895	2.6473
671	35.411	34.802	18.875	18.542	16.105	6.004	8.717	4.608	10.067	6.934	10.113	12.129	7.886	6.919	11.708	5.671	24.747	6.443	9.81075	8.046	9.51959	2.08938	2.1453	2.60427
672	35.844	34.768	18.474	17.751	16.005	5.328	8.864	4.026	10.298	7.007	9.643	11.968	7.926	6.893	11.678	5.483	24.5684	6.07267	9.729	7.995	9.8504	2.50349	2.06184	2.65165
673	36.042	34.878	18.695	18.2	15.823	6.008	8.902	4.544	10.394	7.187	9.551	12.324	7.99	6.989	11.719	5.81	24.7276	6.48467	9.864	8.127	9.86585	2.21776	2.12891	2.55505
674	36.179	35.226	18.876	18.472	16.416	6.292	9	4.157	10.377	7.079	10.022	11.854	8.004	6.99	11.596	5.798	25.0338	6.483	9.833	8.097	9.78952	2.42714	2.00005	2.50083
675	36.298	35.069	18.763	18.296	15.782	6.039	9.02	4.104	10.567	7.186	10.221	11.956	7.966	7.031	12.001	5.606	24.8416	6.38767	9.9825	8.151	9.97145	2.47648	2.00945	2.74397
676	36.776	35.223	19.306	18.4	16.34	5.607	8.394	4.096	10.639	7.259	9.368	11.998	8.049	7.041	11.438	5.529	25.209	6.03233	9.816	8.01425	9.924	2.18034	2.01473	2.50646
677	36.87	35.424	19.101	18.808	16.092	6.299	8.936	4.677	10.703	7.403	9.781	11.776	8.071	7.125	11.776	5.646	25.259	6.63733	9.91575	8.1545	10.0214	2.14956	1.863	2.61245
678	36.858	35.395	19.347	18.878	16.073	6.193	8.643	4.259	10.852	7.466	9.697	11.952	8.068	7.143	11.94	5.747	25.3102	6.365	9.99175	8.2245	9.96636	2.19706	1.91911	2.65437
679	36.911	35.429	19.225	18.903	16.586	6.206	9.165	4.921	10.88	7.392	9.956	12.48	8.147	7.18	12.124	5.575	25.4108	6.764	10.177	8.2565	9.88827	2.17633	2.1294	2.788
680	37.408	35.462	19.069	18.848	15.921	5.934	9.256	4.076	11.001	7.546	10.196	12.24	8.198	7.298	12.147	5.714	25.3416	6.422	10.2458	8.33925	10.226	2.62425	1.9865	2.73831
681	37.461	35.693	19.404	18.632	16.129	6.187	8.936	4.491	11.108	7.618	9.532	12.257	8.254	7.325	12.199	5.789	25.4638	6.538	10.1288	8.39175	10.236	2.24319	2.01232	2.73413
682	37.527	35.627	19.234	19.012	16.221	6.131	8.957	4.543	11.083	7.647	10.312	12.426	8.197	7.292	12.122	5.582	25.5242	6.54367	10.367	8.29825	10.1816	2.23575	2.01276	2.77019
683	37.725	35.618	19.525	18.383	16.206	6.343	8.768	4.319	11.282	7.755	9.698	11.428	8.307	7.35	11.922	5.767	25.4914	6.47667	10.0407	8.3365	10.3024	2.22751	1.71341	2.60974
684	38.143	35.936	19.75	18.987	16.176	6.42	9.172	4.455	11.27	7.815	9.875	12.627	8.253	7.311	12.472	5.73	25.7984	6.68233	10.3968	8.4415	10.377	2.36942	2.05542	2.88159
685	38.06	35.9	19.464	18.954	16.299	6.472	9.294	4.931	11.486	7.884	10.076	12.162	8.296	7.329	12.328	5.69	25.7354	6.899	10.402	8.41075	10.3631	2.21262	1.89026	2.82434
686	38.274	35.905	18.917	18.34	15.409	6.404	8.723	4.391	11.545	7.975	9.276	11.995	8.285	7.392	12.184	5.45	25.369	6.506	10.1977	8.32775	10.8141	2.1678	1.90048	2.83017
687	38.302	35.993	19.184	19.051	16.895	6.552	9.168	4.554	11.531	7.961	9.798	12.511	8.286	7.404	12.511	5.813	25.885	6.758	10.4503	8.5035	10.3535	2.31389	2.00304	2.86095
688	38.605	36.078	19.345	19.198	16.573	6.526	9.078	4.772	11.667	8.147	10.096	12.365	8.419	7.514	12.193	6.072	25.9598	6.792	10.5687	8.5495	10.4865	2.16529	1.8727	2.61422
689	38.439	35.845	19.712	19.105	16.179	6.211	8.926	4.947	11.773	8.039	9.534	12.485	8.448	7.427	12.261	5.852	25.856	6.69467	10.4577	8.497	10.4293	2.03312	2.04477	2.72709
690	38.84	36.052	19.873	18.814	15.961	6.305	8.697	4.934	11.708	8.127	9.718	12.559	8.476	7.448	12.173	5.619	25.908	6.64533	10.528	8.429	10.675	1.90445	1.99485	2.76153
691	38.876	36.174	19.415	18.902	16.387	6.292	9.119	4.441	11.948	8.173	10.008	12.609	8.53	7.594	12.509	5.642	25.9508	6.61733	10.6845	8.56875	10.6706	2.35591	2.00544	2.88924
692	38.766	36.088	19.107	18.858	16.059	6.381	9.093	4.789	11.883	8.346	9.84	11.929	8.482	7.51	11.904	5.623	25.7756	6.75433	10.4995	8.37975	10.7451	2.17615	1.73494	2.63229
693	38.978	36.089	19.334	18.871	15.552	6.336	8.928	4.733	11.909	8.265	9.429	11.883	8.494	7.573	11.996	5.272	25.7648	6.66567	10.3715	8.33375	10.8899	2.11684	1.82338	2.7923
694	38.995	36.25	19.341	19.444	16.329	6.55	9.075	4.653	12.029	8.353	9.869	12.51	8.592	7.651	11.92	5.793	26.0718	6.75933	10.6902	8.489	10.6625	2.21842	1.93571	2.566
695	39.079	36.145	19.435	18.722	15.973	6.444	8.531	4.538	12.157	8.366	9.892	12.291	8.588	7.632	12.343	5.679	25.8708	6.50433	10.6765	8.5605	10.8456	1.99718	1.89318	2.79721
696	39.032	36.225	19.901	19.693	15.775	6.443	9.306	4.946	12.111	8.427	9.762	13.016	8.46	7.625	12.742	5.792	26.1252	6.89833	10.829	8.65475	10.6751	2.21538	2.10828	2.94388
697	39.247	36.229	19.632	19.022	15.909	6.782	9.551	4.981	12.133	8.464	10.332	12.889	8.495	7.568	12.28	5.603	26.0078	7.10467	10.9545	8.4865	10.8534	2.30202	1.97663	2.80172
698	39.224	36.149	19.354	18.773	16.346	6.57	8.852	4.789	12.143	8.491	9.987	11.966	8.595	7.594	12.111	5.515	25.9692	6.737	10.6468	8.45375	10.8105	2.03664	1.73798	2.75505
699	39.547	36.243	18.675	18.901	16.22	6.491	9.012	4.845	12.215	8.448	10.406	12.49	8.598	7.682	11.773	6.026	25.9172	6.78267	10.8898	8.51975	11.0466	2.09876	1.87201	2.41595
700	39.253	36.194	19.06	18.526	16.217	6.754	8.836	4.485	12.376	8.536	10.211	12.36	8.597	7.678	12.547	5.219	25.85	6.69167	10.8707	8.51025	10.9451	2.17617	1.85921	3.04564
701	39.449	36.023	19.185	18.783	16.504	6.382	8.594	4.598	12.291	8.51	9.599	11.851	8.502	7.564	12.951	5.725	25.9888	6.52467	10.5628	8.6855	10.8402	2.00182	1.80638	3.06869
702	39.262	36.011	19.468	20.027	17.178	6.735	9.352	5.167	12.403	8.64	9.939	12.406	8.625	7.794	12.324	5.453	26.3892	7.08467	10.847	8.549	10.3865	2.1143	1.875	2.85258
703	39.304	36.041	19.408	19.055	16.504	6.935	8.754	5.157	12.526	8.674	9.84	12.31	8.687	7.773	12.554	5.619	26.0624	6.94867	10.8375	8.65825	10.7198	1.79854	1.88812	2.89818
704	39.464	35.863	19.562	19.369	16.093	6.814	9.045	4.694	12.303	8.564	10.284	12.61	8.596	7.613	12.087	5.892	26.0702	6.851	10.9403	8.547	10.7483	2.17574	1.89054	2.61122
705	39.348	35.893	18.996	19.369	16.962	6.862	9.131	4.856	12.458	8.534	9.864	12.908	8.647	7.681	12.535	5.603	26.1136	6.94967	10.941	8.6165	10.6147	2.13885	2.09157	2.9047
706	39.295	35.945	19.697	19.108	16.484	6.888	9.4	4.826	12.377	8.679	10.396	11.925	8.605	7.672	11.897	5.948	26.1058	7.038	10.8443	8.5305	10.6464	2.29069	1.67398	2.49968
707	39.44	36.063	18.781	18.712	15.763	7.043	8.985	5.059	12.371	8.501	9.712	12.214	8.481	7.627	12.144	6.009	25.7518	7.029	10.6995	8.56525	11.0862	1.96304	1.9058	2.59675
708	39.226	35.886	19.493	18.852	16.72	7.036	9.168	5.016	12.364	8.585	9.851	12.679	8.641	7.746	12.164	5.587	26.0354	7.07333	10.8698	8.5345	10.6326	2.07625	1.98024	2.73825
709	39.241	35.841	18.72	18.82	15.819	6.488	8.588	4.916	12.349	8.535	9.974	12.761	8.532	7.594	12.346	5.059	25.6882	6.664	10.9047	8.38275	10.9532	1.84232	2.00113	3.02209
710	39.207	35.709	18.944	18.716	15.792	6.576	8.944	5.064	12.28	8.569	9.886	12.354	8.557	7.553	12.496	5.621	25.6736	6.86133	10.7722	8.55675	10.8996	1.95567	1.86324	2.89504
711	39.146	35.592	19.496	19.067	16.347	6.699	8.717	5.368	12.323	8.546	10.335	12.182	8.653	7.722	12.196	5.754	25.9296	6.928	10.8465	8.58125	10.5871	1.6862	1.78116	2.69587
712	39.076	35.763	19.161	18.346	15.713	6.869	8.643	4.808	12.353	8.506	9.946	12.607	8.609	7.59	12.135	5.824	25.6118	6.77333	10.853	8.5395	10.917	1.91929	1.97126	2.65882
713	39.107	35.611	19.049	19.335	16.207	7.211	9.11	5.298	12.297	8.631	9.824	12.652	8.573	7.787	12.452	5.94	25.8618	7.20633	10.851	8.688	10.6385	1.906	1.9423	2.7413
714	38.988	35.584	20.009	19.11	16.05	6.858	9.584	5.263	12.281	8.631	10.367	12.701	8.564	7.759	12.223	5.8	25.9482	7.235	10.995	8.5865	10.5225	2.18503	1.87502	2.68787
715	39.026	35.674	19.164	18.579	15.596	6.521	8.69	4.666	12.164	8.433	9.418	12.172	8.493	7.598	12.628	5.451	25.6078	6.62567	10.5467	8.5425	10.869	2.01404	1.91476	3.00795
716	38.902	35.511	19.334	19.496	17.006	6.882	9.284	5.29	12.307	8.493	10.021	12.541	8.61	7.64	12.261	5.791	26.0498	7.152	10.8405	8.5755	10.3022	2.01064	1.93431	2.72107
717	38.874	35.39	19.575	19.471	15.328	6.804	8.674	4.935	12.327	8.499	9.975	12.098	8.453	7.676	12.651	5.563	25.7276	6.80433	10.7248	8.58575	10.6224	1.8695	1.82292	2.97257
718	38.902	35.602	18.828	18.722	15.632	6.725	8.558	5.12	12.183	8.476	9.8	11.784	8.501	7.608	11.981	5.741	25.5372	6.801	10.5608	8.45775	10.8339	1.72026	1.73714	2.61521
719	38.73	35.267	19.92	19.302	16.291	6.485	9.775	5.065	12.135	8.547	10.392	12.369	8.507	7.734	12.353	5.698	25.902	7.10833	10.8607	8.573	10.2953	2.41608	1.77686	2.78462
720	38.863	35.571	18.83	18.799	15.966	7.221	8.154	4.793	11.981	8.418	9.944	11.874	8.508	7.584	12.107	5.244	25.6058	6.72267	10.5543	8.36075	10.7265	1.73503	1.70424	2.85035
721	38.611	35.408	19.706	18.409	15.736	6.674	9.078	4.776	12.036	8.409	9.821	11.877	8.397	7.39	12.399	5.425	25.574	6.84267	10.5358	8.40275	10.5975	2.15595	1.74008	2.93614
722	38.506	35.299	18.753	19.337	15.88	7.056	8.982	5.414	11.977	8.377	9.613	12.565	8.496	7.574	12.391	5.604	25.555	7.15067	10.633	8.51625	10.5025	1.78588	1.97221	2.85091
723	38.652	35.107	18.702	18.606	15.408	6.92	8.836	5.194	12.05	8.366	9.612	12.431	8.461	7.506	12.067	5.653	25.295	6.98333	10.6147	8.42175	10.7314	1.82183	1.95116	2.6953
724	38.695	35.393	19.298	18.542	15.867	6.643	8.941	5.084	11.978	8.315	9.917	11.931	8.511	7.506	12.624	5.793	25.559	6.88933	10.5352	8.6085	10.6259	1.94026	1.7646	2.90266
725	38.207	35.174	18.904	18.401	16.512	6.406	9.004	5.21	12.006	8.328	9.429	11.711	8.454	7.621	12.309	5.478	25.4396	6.87333	10.3685	8.4655	10.3649	1.93969	1.78232	2.85254
726	38.286	34.992	19.365	19.461	15.967	7.102	8.993	4.905	11.93	8.22	9.41	12.616	8.347	7.391	12.28	5.45	25.6142	7	10.544	8.367	10.2286	2.04591	2.07373	2.87364
727	38.199	35.265	18.497	18.721	16.275	7.45	9.033	5.484	11.954	8.345	10.328	12.086	8.558	7.615	12.262	5.755	25.3914	7.32233	10.6783	8.5475	10.4482	1.77794	1.74891	2.7365
728	38.088	35.084	19.426	18.571	16.685	7.035	9.032	5.736	11.8	8.284	10.093	12.169	8.45	7.553	11.963	5.91	25.5708	7.26767	10.5865	8.469	10.1599	1.66027	1.78157	2.55577
729	38.092	35.073	18.514	18.498	16.16	6.792	8.732	4.915	11.827	8.173	9.846	11.802	8.404	7.458	12.438	5.297	25.2674	6.813	10.412	8.39925	10.4283	1.90859	1.75763	2.99006
730	38.167	35.195	19.051	18.862	15.986	6.727	9.352	5.108	11.705	8.195	9.368	12.449	8.448	7.438	12.276	5.596	25.4522	7.06233	10.4292	8.4395	10.3755	2.14178	1.98537	2.81705
731	37.866	34.878	19.392	18.389	15.953	6.782	9.155	5.079	11.676	8.123	9.569	12.164	8.365	7.497	11.606	5.477	25.2956	7.00533	10.383	8.23625	10.243	2.04716	1.88096	2.55158
732	37.839	34.923	18.871	18.362	16.121	6.932	8.951	5.278	11.664	8.07	9.444	11.94	8.298	7.395	12.607	5.835	25.2232	7.05367	10.2795	8.53375	10.2898	1.83952	1.84879	2.89982
733	37.917	34.836	19.245	17.965	16.006	6.731	9.338	5.672	11.751	8.117	10.191	11.645	8.457	7.438	12.166	5.641	25.1938	7.247	10.426	8.4255	10.3309	1.88669	1.69591	2.75203
734	38.061	34.887	19.118	18.72	16.348	7.195	8.994	5.667	11.632	8.2	10.538	11.923	8.315	7.389	12.846	5.158	25.4268	7.28533	10.5732	8.427	10.202	1.66534	1.69079	3.23027
735	37.746	34.938	18.862	18.668	16.205	6.466	8.815	5.493	11.548	8.024	10.096	11.894	8.245	7.373	12.624	5.461	25.2838	6.92467	10.3905	8.42575	10.1973	1.70784	1.75949	3.03073
736	37.683	34.869	18.591	18.093	16.082	6.706	8.958	5.307	11.594	7.965	9.971	12.126	8.459	7.415	12.625	5.372	25.0636	6.99033	10.414	8.46775	10.3265	1.84203	1.87236	3.05367
737	37.47	34.628	18.587	18.505	16.178	6.917	9.08	5.606	11.671	7.948	10.08	12.375	8.268	7.333	12.014	5.376	25.0736	7.201	10.5185	8.24775	10.1157	1.75433	1.96423	2.78501
738	37.557	34.672	18.774	18.171	16.085	7.366	8.605	5.508	11.527	8.043	9.974	12.223	8.282	7.29	12.451	5.623	25.0518	7.15967	10.4418	8.4115	10.1991	1.55878	1.85503	2.90791
739	37.66	34.718	18.802	18.295	15.758	7.642	8.82	5.318	11.489	7.911	10.489	11.586	8.334	7.489	12.404	5.956	25.0466	7.26	10.3688	8.54575	10.2894	1.78198	1.71189	2.75405
740	37.657	34.803	18.962	18.634	16.303	7.109	8.734	4.975	11.382	8.003	9.769	11.821	8.187	7.255	12.395	5.418	25.2718	6.93933	10.2437	8.31375	10.1063	1.88523	1.7349	2.95404
741	37.166	34.686	19.16	18.376	16.808	7.02	9.238	5.553	11.32	7.905	9.805	12.189	8.251	7.336	12.039	5.77	25.2392	7.27033	10.3048	8.349	9.83153	1.85521	1.8788	2.66478
742	37.038	34.581	18.974	18.29	16.619	7.316	9.37	5.662	11.438	7.793	10.139	11.709	8.24	7.322	12.226	5.646	25.1004	7.44933	10.2698	8.3585	9.85186	1.85759	1.7877	2.79306
743	37.083	34.742	18.248	18.281	15.737	6.605	8.913	5.527	11.224	7.695	10.682	11.07	8.277	7.076	12.182	5.038	24.8182	7.015	10.1677	8.14325	10.2137	1.72983	1.6642	3.00616
744	36.956	34.748	18.243	18.51	16.071	7.083	8.954	5.229	11.236	7.749	10.541	11.594	8.17	7.17	12.345	5.379	24.9056	7.08867	10.28	8.266	10.0676	1.86251	1.74304	2.95429
745	37.064	34.532	18.186	18.085	16.245	7.278	9.169	5.606	11.213	7.701	9.625	11.972	8.174	7.303	11.82	5.252	24.8224	7.351	10.1277	8.13725	10.0888	1.78262	1.89041	2.74376
746	36.985	34.758	18.673	17.535	15.77	6.977	9.065	5.415	11.222	7.739	9.93	11.271	8.211	7.231	12.12	5.432	24.7442	7.15233	10.0405	8.2485	10.2406	1.83131	1.65521	2.82595
747	36.947	34.604	18.48	17.916	15.674	7.204	9.189	5.202	11.234	7.706	10.113	12.235	8.185	7.296	11.756	5.493	24.7242	7.19833	10.322	8.1825	10.1766	1.99351	1.94752	2.63244
748	36.994	34.636	18.356	18.563	15.8	6.907	9.308	4.973	11.253	7.651	10.119	11.829	8.139	7.209	11.552	5.094	24.8698	7.06267	10.213	7.9985	10.0852	2.17169	1.84984	2.68989
749	36.889	34.526	18.857	18.238	15.62	7.465	9.358	5.148	11.087	7.679	10.048	10.95	8.072	7.205	11.799	5.502	24.826	7.32367	9.941	8.1445	10.0422	2.10856	1.57686	2.65996
750	36.626	34.46	17.58	18.403	15.601	6.671	8.983	4.763	11.129	7.601	9.806	11.312	8.207	7.295	11.487	5.043	24.534	6.80567	9.962	8.008	10.1302	2.11322	1.71105	2.67349
751	36.671	34.338	17.939	17.548	15.839	7.172	9.059	5.001	11.08	7.727	9.913	11.248	8.091	7.291	11.568	5.036	24.467	7.07733	9.992	7.9965	10.1403	2.03066	1.62252	2.70966
752	36.556	34.335	17.893	17.983	16.198	7.071	9.325	5.393	11.003	7.585	10.137	11.237	8.101	7.145	11.652	5.249	24.593	7.263	9.9905	8.03675	9.96341	1.97302	1.67201	2.68582
753	36.705	34.564	18.418	17.982	15.291	6.891	9.836	5.491	10.902	7.69	10.073	11.455	8.174	7.135	12.218	5.473	24.592	7.406	10.03	8.25	10.1794	2.21781	1.66017	2.86971
754	36.64	34.376	18.442	18.368	16.205	7.626	8.708	5.151	10.895	7.476	9.551	12.209	7.963	7.139	12.301	5.463	24.8062	7.16167	10.0328	8.2165	9.8432	1.82339	2.02061	2.91491
755	36.649	34.488	18.912	17.709	16.451	7.568	9.289	5.588	10.994	7.478	9.9	12.158	8.059	7.124	12.731	5.2	24.8418	7.48167	10.1325	8.2785	9.86032	1.85201	1.99543	3.19807
756	36.483	34.396	18.352	17.269	14.957	7.249	9.341	5.102	10.934	7.529	9.727	11.488	8.154	7.065	12.131	5.928	24.2914	7.23067	9.9195	8.3195	10.2769	2.11956	1.75508	2.69864
757	36.414	34.152	18.373	17.526	16.152	7.549	8.904	5.271	10.906	7.487	10.316	11.596	7.958	7.11	12.387	5.478	24.5234	7.24133	10.0763	8.23325	9.88645	1.83594	1.80368	2.95423
758	36.341	34.348	17.809	17.581	16.081	6.987	8.81	4.595	10.825	7.543	9.55	11.183	8.041	7.176	11.582	5.601	24.432	6.79733	9.77525	8.1	10.0086	2.11389	1.64493	2.53157
759	36.199	34.129	17.839	17.323	16.482	7.247	9.14	5.411	10.9	7.498	9.885	11.281	8.228	7.213	11.606	5.564	24.3944	7.266	9.891	8.15275	9.87035	1.86457	1.70065	2.55051
760	36.265	34.093	17.354	18.182	16.052	6.685	8.361	5.423	10.83	7.393	10.116	11.28	8.074	7.097	11.714	5.127	24.3892	6.823	9.90475	8.003	9.90872	1.47385	1.74173	2.76096
761	36.147	34.485	18.868	18.436	15.92	6.859	9.178	5.759	10.99	7.419	10.004	11.812	8.02	7.086	12.5	5.09	24.7712	7.26533	10.0562	8.174	9.70944	1.74534	1.90721	3.13224
762	36.234	34.512	19.211	17.681	15.699	7.3	8.87	5.357	10.677	7.459	9.988	11.421	7.986	7.19	11.735	4.67	24.6674	7.17567	9.88625	7.89525	9.87062	1.7598	1.72072	2.92413
763	36.049	34.358	18.193	17.711	17.289	8.032	9.618	5.663	10.604	7.377	10.482	12.068	7.838	6.907	12.169	5.341	24.72	7.771	10.1327	8.06375	9.59407	1.99038	1.97344	2.92435
764	36.015	34.049	17.889	18.366	15.623	7.156	8.746	5.685	10.716	7.585	9.879	11.29	7.98	7.109	12.284	5.725	24.3884	7.19567	9.8675	8.2745	9.79603	1.53089	1.62823	2.82967
765	35.827	34.377	18.417	18.195	15.948	7.691	8.946	5.485	10.614	7.214	10.018	11.354	8.073	7.016	11.536	5.505	24.5528	7.374	9.8	8.0325	9.69194	1.75214	1.80854	2.5624
766	35.915	34.153	18.456	18.087	16.403	7.124	9.669	5.728	10.454	7.223	10.799	11.456	8.016	6.854	11.661	5.42	24.6028	7.507	9.983	7.98775	9.57402	1.99822	1.88636	2.6691
767	36.134	34.548	17.004	17.893	14.84	6.915	8.815	6.025	10.707	7.797	9.543	11.241	8.563	7.088	12.01	5.297	24.0838	7.25167	9.822	8.2395	10.3514	1.42514	1.52482	2.84638
768	35.788	34.013	19.058	17.571	16.168	7.644	8.88	5.634	10.611	7.339	9.675	11.602	7.902	7.101	12.105	5.215	24.5196	7.386	9.80675	8.08075	9.552	1.63831	1.82363	2.90969
769	35.807	34.039	17.574	17.7	16.066	7.206	8.756	5.153	10.621	7.396	9.866	11.919	7.958	7.044	12.191	5.32	24.2372	7.03833	9.9505	8.12825	9.79588	1.80734	1.90238	2.921
770	35.562	33.95	17.669	17.799	16.236	7.445	9.616	5.492	10.534	7.409	10.289	11.461	8.036	6.963	12.459	5.969	24.2432	7.51767	9.92325	8.35675	9.63328	2.06296	1.75052	2.86212
771	35.611	33.936	18.192	17.74	15.953	7.212	8.913	5.727	10.5	7.261	10.291	11.389	7.947	7.013	12.013	5.339	24.2864	7.284	9.86025	8.078	9.62814	1.59422	1.79703	2.83653
772	35.339	34.052	17.689	17.28	16.118	7.661	8.436	5.466	10.424	7.364	9.985	11.943	7.947	6.964	12.417	5.573	24.0956	7.18767	9.929	8.22525	9.70416	1.54054	1.90469	2.95936
773	35.386	33.663	17.225	17.093	15.088	7.004	8.811	4.912	10.324	7.299	10.154	10.837	7.9	6.971	11.894	4.626	23.691	6.909	9.6535	7.84775	9.94445	1.95124	1.59629	3.02893
774	35.437	33.899	17.905	17.95	16.175	7.988	9.097	5.968	10.449	7.28	10.539	11.538	7.793	6.921	11.826	5.369	24.2732	7.68433	9.9515	7.97725	9.53158	1.58645	1.84811	2.75472
775	35.309	33.76	16.911	17.195	16.189	7.088	9.385	6.038	10.309	7.218	10.02	11.704	7.72	6.802	12.273	6.082	23.8728	7.50367	9.81275	8.21925	9.75505	1.71178	1.87961	2.7844
776	35.108	33.646	18.262	17.744	15.897	6.845	8.512	5.517	10.43	7.265	9.705	11.777	7.953	6.97	12.542	5.945	24.1314	6.958	9.79425	8.3525	9.40834	1.50069	1.89214	2.91083
777	35.051	33.588	17.968	17.336	15.598	7.698	8.758	5.463	10.282	7.149	10.158	10.564	7.857	6.762	11.038	5.214	23.9082	7.30633	9.53825	7.71775	9.55772	1.68205	1.60187	2.4648
778	35.26	33.901	18.449	17.879	16.1	7.708	9.259	5.724	10.182	7	9.897	11.015	7.808	6.746	12.087	5.542	24.3178	7.56367	9.5235	8.04575	9.42076	1.77191	1.74793	2.84876
779	35.056	33.806	18.298	17.456	16.454	7.965	9.467	5.599	10.346	7.112	10.537	11.721	7.683	6.913	11.743	5.667	24.214	7.677	9.929	8.0015	9.36006	1.95002	1.97402	2.629
780	34.913	33.523	18.734	17.83	16.601	7.651	8.834	5.611	10.115	7.135	10.109	11.199	7.769	6.922	12.196	5.727	24.3202	7.36533	9.6395	8.1535	9.08038	1.63038	1.74653	2.82218
781	34.681	33.324	17.006	17.592	15.648	7.145	8.292	4.872	10.211	7.092	9.838	11.829	7.958	6.771	11.408	5.388	23.6502	6.76967	9.7425	7.88125	9.48872	1.74062	1.967	2.57506
782	34.753	33.516	18.902	17.664	16.379	7.967	8.668	5.911	10.198	7.011	10.164	11.519	7.825	6.905	12.009	6.028	24.2428	7.51533	9.723	8.19175	9.08434	1.43292	1.91491	2.64849
783	34.583	33.208	17.79	18.29	15.48	7.907	8.883	6.025	10.122	6.905	9.455	11.431	7.769	6.809	11.241	5.454	23.8702	7.605	9.47825	7.81825	9.2258	1.45274	1.90174	2.47157
784	34.479	33.562	18.756	16.547	17.099	7.541	8.598	5.788	9.997	6.967	10.134	10.471	7.802	6.766	11.84	5.379	24.0886	7.309	9.39225	7.94675	9.10869	1.41929	1.62905	2.77884
785	34.29	33.164	18.712	17.646	16.296	7.982	9.427	6.158	10	6.958	10.327	11.322	7.542	6.734	11.795	5.685	24.0216	7.85567	9.65175	7.939	8.90995	1.63816	1.88178	2.68073
786	34.421	33.402	17.546	17.497	16.817	7.776	9.186	5.687	10.062	6.946	10.085	10.887	7.465	6.717	11.713	5.371	23.9366	7.54967	9.495	7.8165	9.11747	1.76045	1.74209	2.73835
787	34.023	33.126	16.748	17.259	15.531	7.132	8.252	5.453	9.941	6.996	9.932	11.392	7.753	6.842	11.66	5.331	23.3374	6.94567	9.56525	7.8965	9.37158	1.40877	1.84515	2.70051
788	34.055	33.254	18.369	17.561	16.189	7.568	8.915	6.245	10.005	6.929	9.748	10.654	7.774	6.735	10.972	5.805	23.8856	7.576	9.334	7.8215	8.95621	1.33502	1.64804	2.24905
789	34.019	33.08	17.399	16.886	15.276	7.491	8.394	5.612	9.767	6.777	10.469	11.03	7.542	6.704	11.42	5.368	23.332	7.16567	9.51075	7.7585	9.36598	1.41925	1.89433	2.59999
790	33.987	33.237	17.846	17.244	15.813	6.652	8.685	5.798	9.701	6.886	9.764	10.768	7.618	6.596	11.546	4.819	23.6254	7.045	9.27975	7.64475	9.15018	1.48308	1.66902	2.84635
791	34.069	33.109	18.048	17.374	15.776	8.238	9.086	5.492	9.847	6.821	8.962	11.333	7.554	6.873	11.907	5.467	23.6752	7.60533	9.24075	7.95025	9.09389	1.87867	1.88661	2.77728
792	33.884	32.85	17.543	16.624	14.837	7.201	9.168	5.388	9.764	6.807	9.704	11.236	7.604	6.743	10.981	5.439	23.1476	7.25233	9.37775	7.69175	9.38672	1.89052	1.8545	2.36656
793	33.544	33.133	17.56	17.126	16.08	7.044	8.908	5.436	9.522	6.865	9.775	11.46	7.499	6.666	11.792	5.513	23.4886	7.12933	9.4055	7.8675	9.00894	1.73757	1.89958	2.74012
794	33.734	32.83	18.25	16.74	15.595	7.498	8.565	6.743	9.699	6.692	10.102	11.559	7.62	6.635	11.664	5.545	23.4298	7.602	9.513	7.866	9.04859	0.915441	2.04334	2.67006
795	33.666	32.796	17.449	17.267	15.634	7.052	8.841	5.6	9.659	6.743	9.826	10.76	7.571	6.433	11.693	4.9	23.3624	7.16433	9.247	7.64925	9.04167	1.62342	1.73821	2.90951
796	33.558	32.641	18.009	16.71	16.554	7.302	9.018	5.743	9.542	6.543	10.239	10.785	7.514	6.677	11.668	5.405	23.4944	7.35433	9.27725	7.816	8.79237	1.63813	1.89248	2.71043
797	33.319	32.804	17.069	17.493	15.425	7.792	8.534	5.884	9.386	6.635	9.488	10.787	7.519	6.591	11.397	5.089	23.222	7.40333	9.074	7.649	9.01718	1.36708	1.7466	2.6918
798	33.459	32.639	16.367	15.873	14.104	7.156	7.832	5.1	9.342	6.633	9.394	9.862	7.478	6.485	10.851	5.178	22.4884	6.696	8.80775	7.498	9.68145	1.4229	1.46857	2.42567
799	33.187	32.451	17.338	16.338	15.312	7.814	9.576	6.472	9.394	6.622	9.392	11.26	7.522	6.735	11.208	5.104	22.9252	7.954	9.167	7.64225	9.06386	1.55673	1.91135	2.58166
800	33.042	32.514	17.898	16.73	15.589	8.148	9.153	6.6	9.359	6.552	10.538	10.646	7.397	6.53	11.977	5.378	23.1546	7.967	9.27375	7.8205	8.82475	1.28609	1.90583	2.89177
801	33.119	32.752	16.808	16.644	14.81	6.953	8.924	5.146	9.377	6.451	9.444	10.786	7.385	6.497	11.744	4.38	22.8266	7.00767	9.0145	7.5015	9.2623	1.88959	1.82808	3.09651
802	32.634	32.202	16.51	16.241	15.138	7.045	8.658	5.969	9.435	6.547	8.954	10.863	7.407	6.625	11.401	5.512	22.545	7.224	8.94975	7.73625	9.02872	1.35341	1.79529	2.56391
803	32.739	32.216	16.81	16.032	15.421	6.974	8.558	5.64	9.424	6.524	10.225	10.558	7.334	6.679	12.114	5.307	22.6436	7.05733	9.18275	7.8585	8.99247	1.46078	1.83528	2.96005
804	32.751	32.238	17.585	16.648	15.455	7.614	8.693	5.369	9.097	6.504	9.574	10.568	7.538	6.41	11.165	4.915	22.9354	7.22533	8.93575	7.507	8.76069	1.69574	1.73311	2.66482
805	32.718	32.196	17.607	16.952	16.011	7.179	8.547	6.04	9.287	6.377	9.858	11.14	7.429	6.699	12.023	5.071	23.0968	7.25533	9.1655	7.8055	8.56545	1.25524	2.01401	2.97942
806	32.805	32.253	17.565	16.891	15.853	7.576	8.838	6.145	9.008	6.244	9.456	10.718	7.342	6.518	11.279	6.173	23.0734	7.51967	8.8565	7.828	8.65546	1.34738	1.88615	2.35235
807	32.381	32.002	17.08	16.339	16.424	8.098	8.611	5.988	9.007	6.31	10.094	11.064	7.391	6.448	11.976	5.475	22.8452	7.56567	9.11875	7.8225	8.53783	1.39017	2.05237	2.87737
808	32.509	32.034	18.174	16.647	16.417	7.949	8.18	6.077	8.987	6.244	10.311	10.916	7.415	6.61	12.01	5.962	23.1562	7.402	9.1145	7.99925	8.35014	1.15328	2.0763	2.73909
809	32.019	31.958	16.994	16.676	15.926	8.627	9.435	5.684	8.911	6.427	9.377	10.906	7.394	6.322	10.848	5.453	22.7146	7.91533	8.90525	7.50425	8.47478	1.97417	1.85897	2.3663
810	31.918	32.021	16.306	15.515	14.959	6.557	8.05	5.679	9.135	6.307	10.129	10.744	7.424	6.321	10.422	4.977	22.1438	6.762	9.07875	7.286	8.98243	1.19872	1.96315	2.31778
811	32.104	31.894	16.888	15.737	14.497	6.938	9.064	6.732	8.627	6.144	9.507	10.629	7.32	6.172	11.101	4.665	22.224	7.578	8.72675	7.3145	8.96359	1.29103	1.90682	2.7485
812	31.926	31.827	16.073	16.672	16.941	6.914	9.009	6.016	8.846	6.253	10.416	10.207	7.303	6.361	10.865	4.969	22.6878	7.313	8.9305	7.3745	8.39405	1.53588	1.91593	2.51676
813	32.118	32.088	16.732	17.43	15.793	7.275	9.154	5.79	8.976	6.306	10.518	10.033	7.369	6.175	11.488	5.335	22.8322	7.40633	8.95825	7.59175	8.48296	1.68584	1.88172	2.72828
814	31.88	31.636	16.364	15.41	15.142	7.273	9.24	5.782	8.819	6.132	10.492	10.194	7.215	6.296	11.595	5.991	22.0864	7.43167	8.90925	7.77425	8.84102	1.73445	1.98972	2.59975
815	31.76	31.833	15.814	15.043	14.951	7.121	8.015	4.871	8.917	6.048	9.464	9.895	7.282	6.335	9.803	4.131	21.8802	6.669	8.581	6.88775	9.05854	1.62	1.73544	2.34942
816	31.567	31.432	16.957	15.497	16.056	6.739	8.509	5.87	8.862	6.133	10.093	10.435	7.045	6.261	10.745	5.497	22.3018	7.03933	8.88075	7.387	8.41259	1.34489	1.95241	2.32616
817	31.175	31.368	17.073	16.073	15.072	7.849	9.694	6.379	8.599	5.917	10.819	10.538	7.224	6.211	10.819	5.629	22.1522	7.974	8.96825	7.47075	8.35503	1.66103	2.26096	2.32742
818	31.282	31.358	17.112	16.452	16.2	7.109	8.808	5.19	8.684	5.972	8.934	10.223	7.192	6.198	10.506	5.316	22.4808	7.03567	8.45325	7.303	8.07596	1.81011	1.78634	2.26868
819	31.308	31.353	17.002	15.628	15.149	7.638	8.182	5.721	8.589	6.024	9.748	10.642	7.236	6.162	10.898	5.273	22.088	7.18033	8.75075	7.39225	8.46459	1.29276	2.00272	2.47113
820	31.168	31.402	16.259	15.474	15.003	7.094	8.192	5.681	8.358	5.938	9.134	9.071	7.137	6.25	10.609	5.838	21.8612	6.989	8.12525	7.4585	8.6148	1.25879	1.50003	2.16914
821	31.194	31.04	15.845	16.004	15.59	7.572	8.113	5.663	8.58	6.043	9.481	10.404	7.167	6.213	10.945	4.9	21.9346	7.116	8.627	7.30625	8.38382	1.28708	1.87673	2.59776
822	30.975	31.349	15.451	15.098	15.74	6.65	7.934	4.722	8.503	6.139	8.962	9.83	7.346	6.08	11.307	5.172	21.7226	6.43533	8.3585	7.47625	8.62097	1.61672	1.57867	2.70498
823	30.959	31.03	16.715	15.436	15.244	7.159	8.885	5.912	8.284	5.773	9.939	10.962	7.156	6.116	10.994	5.593	21.8768	7.31867	8.7395	7.46475	8.3425	1.49292	2.26465	2.44087
824	30.868	31.346	16.236	16.538	16.572	7.38	8.655	6.105	8.272	5.831	9.225	10.567	6.984	6.098	10.802	4.562	22.312	7.38	8.47375	7.1115	8.03154	1.275	1.99757	2.65601
825	30.799	31.026	15.862	14.883	14.98	6.658	8.322	5.809	8.32	5.73	9.53	9.399	7.012	6.189	10.411	5.614	21.51	6.92967	8.24475	7.3065	8.59211	1.27834	1.76199	2.14771
826	30.665	31.099	17.454	16.104	15.429	8.238	9.993	6.516	8.106	5.808	11.074	10.567	7.187	6.154	12.255	4.862	22.1502	8.249	8.88875	7.6145	8.00575	1.73853	2.42869	3.23658
827	30.268	30.691	16.077	15.807	15.335	6.437	8.426	5.932	8.106	5.756	9.1	9.943	7.119	5.977	9.774	4.685	21.6356	6.93167	8.22625	6.88875	8.07909	1.31853	1.8099	2.16529
828	30.359	30.939	17.259	15.765	15.234	7.003	8.629	6.406	8.325	5.597	9.193	10.256	7.081	6.057	10.953	5.709	21.9112	7.346	8.34275	7.45	8.01359	1.15051	1.99357	2.40684
829	30.348	30.697	16.373	14.953	16.204	6.867	8.322	6.157	8.029	5.47	9.371	9.844	6.919	6.026	10.622	5.142	21.715	7.11533	8.1785	7.17725	8.05974	1.10366	1.9625	2.40836
830	30.203	30.637	15.299	15.096	15.805	6.619	8.882	4.525	7.869	5.581	8.983	8.983	6.981	5.841	9.456	4.458	21.408	6.67533	7.854	6.684	8.23227	2.17905	1.60375	2.11644
831	30.538	30.956	17.494	15.67	15.535	7.869	9.017	7.362	8.058	5.58	11.111	11.348	6.917	6.18	12.023	6.18	22.0386	8.08267	9.02425	7.825	7.98857	0.847937	2.7417	2.82015
832	29.871	30.707	17.207	14.862	15.69	7.966	8.966	6.207	7.852	5.379	9.448	9.345	6.821	6.016	11.414	5.138	21.6674	7.713	8.006	7.34725	7.92072	1.39679	1.89711	2.79693
833	30.008	30.207	15.993	15.103	15.479	6.884	8.459	6.199	8.134	5.65	9.144	8.973	6.966	5.892	10.582	5.103	21.358	7.18067	7.97525	7.13575	7.99372	1.15884	1.61178	2.42105
834	29.668	30.516	15.818	15.173	15.139	7.434	7.536	6.449	7.855	5.369	8.826	9.844	6.901	5.816	10.794	5.092	21.2628	7.13967	7.9735	7.15075	8.07003	0.600305	1.91685	2.54006
835	29.685	30.361	17.097	14.41	15.701	7.92	9.037	6.629	7.805	5.53	8.932	9.037	7.021	5.863	11.165	5.024	21.4508	7.862	7.826	7.26825	7.88642	1.20505	1.62909	2.7238
836	29.473	30.358	16.746	15.288	15.356	7.458	8.169	7.051	7.703	5.332	10.102	9.695	6.781	5.763	11.186	4.542	21.4442	7.55933	8.208	7.068	7.76137	0.565847	2.18516	2.8939
837	29.283	30.302	15.862	14.828	16.379	7.621	8.69	6.276	7.687	5.417	10	9.897	6.742	5.865	10.241	5.138	21.3308	7.529	8.25025	6.9965	7.75297	1.20963	2.16933	2.26023
838	29.44	30.169	16.673	15.966	15.33	7.912	8.972	6.499	7.873	5.383	9.855	10.138	6.784	5.843	11.056	5.828	21.5156	7.79433	8.31225	7.37775	7.58597	1.24069	2.19749	2.49261
839	29.337	30.233	15.718	15.267	14.885	6.766	8.397	5.517	7.685	5.438	9.993	9.334	6.878	5.704	9.785	4.684	21.088	6.89333	8.1125	6.76275	7.95102	1.44422	2.03011	2.20525
840	29.264	30.349	15.784	15.131	14.924	7.428	8.322	5.399	7.777	5.334	9.388	10.11	7.015	5.947	10.729	4.574	21.0904	7.04967	8.15225	7.06625	7.97224	1.49778	2.11685	2.63833
841	29.271	29.996	16.319	16.247	15.744	7.836	7.98	6.326	7.694	5.401	10.065	10.029	6.995	5.761	11.215	5.823	21.5154	7.38067	8.29725	7.4485	7.41852	0.916202	2.22681	2.57437
842	28.728	29.908	16.696	15.415	15.094	7.44	8.01	5.838	7.865	5.566	9.256	8.9	6.787	5.803	10.182	4.13	21.1682	7.096	7.89675	6.7255	7.47547	1.12612	1.66207	2.55204
843	29.032	29.753	15.403	14.39	14.356	6.951	8.592	5.484	7.64	5.269	10.234	10.304	6.744	5.867	10.444	5.623	20.5868	7.009	8.36175	7.1695	8.0535	1.55481	2.4058	2.23544
844	29.249	29.979	16.642	14.938	16.099	7.179	8.339	5.91	7.535	5.48	10.007	9.065	6.664	5.762	10.769	6.309	21.3814	7.14267	8.02175	7.376	7.54488	1.21491	1.97712	2.29222
845	28.854	29.769	16.77	13.734	15.562	7.074	8.868	5.383	7.738	5.398	9.834	10.248	6.875	5.521	11.111	4.934	20.9378	7.10833	8.3045	7.11025	7.72691	1.74275	2.2275	2.78826
846	28.992	29.626	17.399	14.435	14.888	7.392	8.229	6.45	7.545	5.16	9.728	9.972	6.731	5.91	10.112	6.137	21.068	7.357	8.10125	7.2225	7.61052	0.890016	2.24398	1.95719
847	28.657	29.528	17.401	16.087	15.27	8.629	8.203	6.321	7.522	5.252	10.476	10.831	6.793	5.785	11.577	5.54	21.3886	7.71767	8.52025	7.42375	7.08034	1.22816	2.63581	2.82143
848	28.499	29.609	15.555	14.256	15.73	7.163	7.725	5.372	7.539	5.273	8.778	8.883	6.834	5.576	10.042	5.056	20.7298	6.75333	7.61825	6.877	7.63032	1.22883	1.6784	2.23813
849	28.337	29.611	16.26	13.887	14.096	7.048	8.932	5.548	7.301	5.198	9.351	9.805	6.731	5.758	10.468	5.443	20.4382	7.176	7.91375	7.1	7.86019	1.69563	2.11292	2.31129
850	28.323	29.567	15.425	14.725	14.306	6.751	8.045	5.561	7.613	5.414	8.744	9.094	6.897	5.665	9.654	4.582	20.4692	6.78567	7.71625	6.6995	7.76011	1.24236	1.65987	2.18495
851	28.193	29.402	15.492	14.826	14.301	7.431	8.062	5.573	7.217	5.141	9.674	8.833	6.742	5.447	9.639	5.012	20.4428	7.022	7.71625	6.71	7.65038	1.29392	1.99675	2.08634
852	28.321	29.297	14.936	14.588	14.936	7.746	8.684	5.801	7.231	5.08	9.969	9.726	6.838	5.583	11.393	6.148	20.4156	7.41033	8.0015	7.4905	7.67117	1.47052	2.30751	2.6518
853	27.949	29.567	15.7	14.993	15.7	7.249	8.239	6.011	7.66	5.104	9.76	9.76	6.781	5.593	11.033	5.021	20.7818	7.16633	8.071	7.107	7.30938	1.1163	2.2119	2.71805
854	27.758	29.336	15.199	14.03	14.718	7.153	8.081	5.812	7.347	5.138	9.319	9.56	6.628	5.651	9.629	4.711	20.2082	7.01533	7.841	6.65475	7.64396	1.14075	2.05667	2.13171
855	28.126	29.371	15.499	14.806	15.361	6.727	8.634	6.657	7.215	5.142	9.951	9.431	6.755	5.716	10.818	5.548	20.6326	7.33933	7.93475	7.20925	7.42636	1.12176	2.20768	2.46434
856	27.754	29.342	15.481	15.345	15.958	7.588	8.71	6.159	7.278	5.036	9.935	9.595	6.719	5.719	10.31	5.716	20.776	7.48567	7.961	7.116	7.12065	1.27858	2.27953	2.18104
857	27.801	29.095	15.915	15.175	15.646	7.705	9.388	5.485	7.299	5.201	9.354	9.758	6.887	5.644	10.027	5.35	20.7264	7.526	7.903	6.977	7.06862	1.95765	2.09857	2.13967
858	28.025	28.879	15.336	13.154	15.537	7.081	8.087	5.872	7.141	4.974	9.732	8.725	6.705	5.683	10.503	4.899	20.1862	7.01333	7.643	6.9475	7.60925	1.10905	2.07446	2.48299
859	27.745	28.674	16.464	14.3	15.382	7.201	8.621	5.781	7.204	4.987	9.669	10.311	6.753	5.689	10.311	5.443	20.513	7.201	8.04275	7.049	7.07507	1.42	2.43795	2.24775
860	27.526	28.977	15.202	14.523	15.439	8.008	8.551	5.667	7.189	4.928	10.417	9.535	6.768	5.561	10.825	4.717	20.3334	7.40867	8.01725	6.96775	7.25418	1.53257	2.46927	2.70574
861	27.517	28.672	15.823	14.724	15.29	7.095	8.761	5.963	7.056	4.928	9.294	9.36	6.638	5.526	10.626	5.097	20.4052	7.273	7.6595	6.97175	7.04194	1.40747	2.11255	2.52123
862	27.561	28.733	14.981	15.015	14.406	7.339	8.353	6.053	7.168	5.058	9.368	8.624	6.726	5.517	10.382	4.971	20.1392	7.24833	7.5545	6.899	7.32582	1.15268	1.89864	2.43504
863	27.11	28.622	15.433	14.2	14.833	7.2	7.9	5.333	7.029	5.329	9.167	9.833	6.844	5.732	9.067	5.133	20.0396	6.811	7.8395	6.694	7.17772	1.32698	2.05717	1.73357
864	27.237	28.734	15.44	14.323	15.145	7.622	9.231	6.34	7.093	4.789	9.625	9.823	6.621	5.676	11.432	6.045	20.1758	7.731	7.8325	7.4435	7.16058	1.44858	2.37942	2.68728
865	27.479	28.662	15.758	15.097	15.461	8.755	9.118	7.4	7.001	4.888	9.316	9.878	6.559	5.548	10.538	5.319	20.4914	8.42433	7.77075	6.991	6.93532	0.905476	2.28991	2.42526
866	27.126	28.774	15.849	13.803	16.174	7.048	8.867	6.301	7.136	4.768	10.361	9.191	6.866	5.645	10.945	5.034	20.3452	7.40533	7.864	7.1225	7.02565	1.31979	2.45704	2.65971
867	27.059	28.467	16.709	15.216	15.121	8.1	9.498	7.211	7.107	4.842	10.07	10.006	6.621	5.66	10.642	6.004	20.5144	8.26967	8.00625	7.23175	6.66556	1.1529	2.52185	2.308
868	26.895	28.305	15.347	14.076	15.054	7.201	8.472	6.028	7.092	4.981	9.221	9.482	6.605	5.405	9.677	5.116	19.9354	7.23367	7.694	6.70075	7.0303	1.22233	2.1017	2.08628
869	26.947	28.326	15.057	13.893	15.283	6.527	8.336	5.46	7.05	5.028	8.821	8.562	6.78	5.759	9.015	4.168	19.9012	6.77433	7.36525	6.4305	7.09776	1.45387	1.74294	2.03073
870	27.118	28.35	15.09	13.171	13.939	6.746	8.248	5.659	6.92	4.836	8.951	9.367	6.607	5.642	9.431	4.923	19.5336	6.88433	7.5185	6.65075	7.52961	1.30003	2.08351	1.97774
871	26.812	28.403	17.074	14.313	16.407	8.251	9.616	6.95	6.853	4.65	9.997	9.806	6.746	5.213	11.679	5.681	20.6018	8.27233	7.8265	7.32975	6.50031	1.33313	2.56043	2.96961
872	26.75	28.221	16.099	14.318	14.572	8.113	8.241	5.759	6.733	4.65	9.29	8.845	6.809	5.527	10.086	5.282	19.992	7.371	7.3795	6.926	6.89408	1.3975	2.13431	2.21052
873	26.745	28.254	14.29	13.54	15.416	7.442	8.724	5.91	6.903	4.971	9.631	9.694	6.544	5.623	10.225	5.66	19.649	7.35867	7.79975	7.013	7.21728	1.40885	2.29112	2.18324
874	26.699	28.212	14.345	13.995	14.631	6.87	7.952	5.852	6.857	4.87	9.097	8.302	6.604	5.528	9.669	4.771	19.5764	6.89133	7.2815	6.643	7.21598	1.05016	1.85589	2.15297
875	26.829	28.172	14.299	13.081	14.955	7.306	8.055	5.183	6.754	4.72	9.835	9.616	6.777	5.616	9.959	5.12	19.4672	6.848	7.73125	6.868	7.37942	1.48977	2.44954	2.17452
876	26.479	28.05	15.172	14.138	14.89	7.555	8.527	6.364	6.817	4.732	10.282	9.216	6.589	5.443	10.282	5.235	19.7458	7.482	7.76175	6.88725	6.8964	1.08335	2.48586	2.34016
877	26.31	28.126	16.174	13.997	16.734	7.963	8.46	5.661	6.938	4.536	9.3	9.176	6.576	5.497	10.295	5.537	20.2682	7.36133	7.4875	6.97625	6.45812	1.49335	2.24718	2.26818
878	26.296	28.002	15.509	14.107	14.686	6.764	8.44	6.703	6.78	4.589	9.537	9.324	6.585	5.434	10.207	4.784	19.72	7.30233	7.5575	6.7525	6.82669	0.98572	2.34204	2.4204
879	26.339	28.196	14.864	14.418	15.669	7.03	8.579	5.987	6.715	4.581	9.503	9.175	6.425	5.474	10.575	5.451	19.8972	7.19867	7.4935	6.98125	6.77494	1.30421	2.3061	2.43844
880	26.342	28.146	14.452	14.005	15.435	7.569	8.85	6.496	6.813	4.71	9.863	9.535	6.367	5.638	9.178	5.244	19.676	7.63833	7.73025	6.60675	6.95724	1.17853	2.43372	1.77617
881	26.16	27.662	14.908	14.502	15.751	7.73	8.631	6.277	6.683	4.707	9.619	9.329	6.586	5.532	9.852	4.679	19.7966	7.546	7.5845	6.66225	6.53176	1.18774	2.32918	2.26503
882	26.299	27.818	15.663	13.967	15.522	7.577	8.397	6.757	6.712	4.695	9.895	9.33	6.573	5.54	9.952	5.711	19.8538	7.577	7.658	6.944	6.63232	0.82	2.41344	2.05566
883	26.094	27.823	15.331	14.381	16.001	7.316	9.187	5.948	6.738	4.717	9.913	9.355	6.778	5.562	10.835	5.027	19.926	7.48367	7.68075	7.0505	6.47444	1.626	2.41237	2.62722
884	25.958	27.88	14.14	13.358	15.459	6.733	8.026	6.194	6.757	4.629	9.238	8.457	6.738	5.645	10.638	4.525	19.359	6.98433	7.27025	6.8865	6.97521	0.941505	2.04288	2.65919
885	25.987	27.532	15.25	14.181	15.485	7.508	8.446	6.595	6.897	4.806	9.88	8.968	6.781	5.686	10.48	5.865	19.687	7.51633	7.63775	7.203	6.49796	0.925528	2.26309	2.23669
886	25.844	27.434	15.268	13.549	14.799	7.452	9.562	6.357	6.725	4.711	9.693	9.38	6.618	5.425	10.109	5.341	19.3788	7.79033	7.62725	6.87325	6.68103	1.62907	2.35641	2.23461
887	25.665	27.482	14.208	13.542	15.146	7.178	8.609	5.969	6.741	4.836	10.286	9.003	6.673	5.557	10.212	5.155	19.2086	7.252	7.7165	6.89925	6.77782	1.32155	2.41566	2.29997
888	25.725	27.565	14.911	13.564	14.622	7.167	8.634	5.7	6.622	4.67	9.692	8.393	6.715	5.602	9.692	5.411	19.2774	7.167	7.34425	6.855	6.77564	1.467	2.18213	1.97681
889	25.668	27.558	14.691	13.681	15.797	7.838	8.584	6.348	6.742	4.83	9.642	8.993	6.819	5.503	10.147	5.819	19.479	7.59	7.55175	7.072	6.58925	1.13844	2.19924	2.12536
890	25.441	27.18	15.27	13.501	16.224	7.053	8.636	5.959	6.871	4.675	9.73	8.752	6.838	5.538	10.428	5.098	19.5232	7.216	7.507	6.9755	6.30254	1.34592	2.22983	2.4173
891	25.475	27.294	15.44	14.138	15.552	7.72	8.685	6.014	6.72	4.886	9.381	9.919	6.785	5.712	10.458	5.79	19.5798	7.473	7.7265	7.18625	6.2697	1.35252	2.35414	2.23519
892	25.492	27.337	15.357	14.081	15.133	7.477	8.753	5.753	6.793	4.741	9.76	8.373	6.808	5.616	10.499	5.328	19.48	7.32767	7.41675	7.06275	6.38203	1.50556	2.15669	2.37874
893	25.31	27.028	14.098	14.703	16.249	7.164	8.835	6.057	6.626	4.756	9.983	8.542	6.545	5.572	10.213	5.409	19.4776	7.352	7.47675	6.93475	6.18842	1.39851	2.27613	2.24231
894	25.354	27.231	15.669	13.924	15.752	7.357	9.393	6.484	6.72	4.854	9.643	10.017	6.786	5.754	10.91	5.902	19.586	7.74467	7.8085	7.338	6.20114	1.49274	2.46013	2.42453
895	25.41	27.161	15.348	13.324	15.748	7.473	8.135	6.291	6.727	4.61	9.537	8.636	6.918	5.665	9.497	5.109	19.3982	7.29967	7.3775	6.79725	6.3841	0.93414	2.18552	1.95238
896	25.336	27.145	15.718	14.021	15.893	7.41	8.21	6.903	6.785	4.695	9.692	9.36	6.876	5.742	9.906	5.363	19.6226	7.50767	7.633	6.97175	6.11889	0.658951	2.35039	2.05907
897	25.113	27.212	15.48	14.568	15.518	7.768	8.927	6.781	6.71	4.936	10.275	9.307	6.851	5.844	10.313	5.926	19.5782	7.82533	7.807	7.2335	6.06819	1.07415	2.43496	2.10316
898	25.075	27.039	14.969	13.682	14.933	7.249	8.953	6.289	6.65	4.939	9.877	9.496	6.898	5.676	10.076	5.745	19.1396	7.497	7.7405	7.09875	6.37386	1.3492	2.35825	2.06246
899	24.913	26.762	15.138	14.303	15.486	7.517	8.683	6.734	6.744	4.81	9.988	9.344	6.868	5.81	10.823	6.055	19.3204	7.64467	7.7215	7.389	6.0005	0.980752	2.39457	2.33357
900	24.799	26.736	15.104	13.818	15.549	7.389	8.778	6.343	6.614	4.805	9.361	9.566	6.912	5.83	10.115	5.657	19.2012	7.50333	7.5865	7.1285	6.06657	1.22152	2.29127	2.067
901	24.841	26.805	14.931	13.497	15.854	7.696	8.652	6.46	6.684	4.777	9.591	9.575	6.992	5.812	10.481	5.339	19.1856	7.60267	7.65675	7.156	6.1563	1.09898	2.35657	2.3231
902	24.639	26.805	15.404	14.65	16.399	7.863	9.114	6.755	6.685	4.816	9.547	9.564	6.98	5.756	10.254	5.664	19.5794	7.91067	7.653	7.1635	5.69335	1.18022	2.32556	2.14588
903	24.658	26.878	15.431	14.259	16.063	7.43	9.188	6.737	6.832	4.825	10.082	10.066	6.997	5.828	10.683	5.873	19.4578	7.785	7.95125	7.34525	5.84955	1.26347	2.58447	2.28994
904	24.668	26.771	15.28	14.203	16.295	7.822	9.201	7.124	6.63	4.9	10.202	10.293	7.001	5.731	10.762	5.609	19.4434	8.049	8.00625	7.27575	5.82448	1.05694	2.68287	2.40789
905	24.503	26.62	15.827	13.602	15.797	6.779	9.107	6.366	6.588	4.768	9.52	9.343	6.917	5.809	10.139	4.907	19.2698	7.41733	7.55475	6.943	5.86193	1.47779	2.29206	2.28374
906	24.377	26.356	15.816	14.033	15.859	8.167	9.216	7.232	6.719	4.814	10.611	10.108	7.032	5.796	11.114	5.852	19.2882	8.205	8.063	7.4485	5.64097	0.992546	2.77108	2.50924
907	24.346	26.54	15.585	14.402	16.204	7.743	9.531	7.293	6.555	4.781	10.249	9.813	7.013	5.807	10.883	5.674	19.4154	8.189	7.8495	7.34425	5.59442	1.18379	2.62706	2.43484
908	24.227	26.236	14.604	13.7	15.63	7.531	8.895	6.897	6.557	4.674	10.109	9.151	7.045	5.806	10.555	5.763	18.8794	7.77433	7.62275	7.29225	5.88176	1.02098	2.47305	2.25494
909	24.306	26.282	14.866	13.294	16.278	7.66	9.458	6.634	6.614	4.854	9.751	9.418	6.993	5.783	10.364	5.968	19.0052	7.91733	7.65925	7.277	5.87875	1.42948	2.34027	2.1257
910	24.26	25.984	15.044	14.243	16.016	7.266	9.184	7.266	6.513	4.772	9.841	9.854	7.024	5.737	10.564	5.886	19.1094	7.90533	7.745	7.30275	5.55804	1.10736	2.52967	2.24887
911	24.086	26.117	15.892	14.027	16.219	7.568	9.59	6.876	6.606	4.878	10.451	9.355	7.03	5.836	10.438	6.328	19.2682	8.01133	7.8225	7.408	5.43792	1.41027	2.54346	2.07857
912	24.2	26.155	15.802	13.758	15.943	7.856	9.3	7.282	6.591	4.869	10.258	10.092	7.085	5.817	11.076	6.311	19.1716	8.146	7.9525	7.57225	5.59325	1.03979	2.66173	2.39342
913	23.969	26.038	15.081	14.107	16.042	7.965	9.401	6.866	6.54	4.797	9.788	9.675	7.109	5.785	10.275	5.868	19.0474	8.07733	7.7	7.25925	5.52863	1.27123	2.45176	2.09971
914	23.976	26.038	14.433	13.775	16.356	7.322	9.481	6.875	6.51	4.79	10.387	9.593	7.023	5.795	10.102	5.845	18.9156	7.89267	7.82	7.19125	5.68787	1.39358	2.62234	2.02177
915	23.907	26.098	15.65	13.827	15.786	7.564	9.189	7.093	6.622	4.814	10.727	10.255	7.189	5.806	10.652	6.039	19.0536	7.94867	8.1045	7.4215	5.53981	1.09967	2.85933	2.23691
916	23.895	25.923	14.434	13.42	16.192	7.571	9.452	7.461	6.475	4.836	9.916	9.879	7.035	5.793	10.99	6.142	18.7728	8.16133	7.7765	7.49	5.73368	1.1191	2.53892	2.39123
917	23.803	25.96	15.173	13.782	16.192	7.195	9.407	6.847	6.476	4.807	10.252	9.867	7.082	5.866	10.724	5.878	18.982	7.81633	7.8505	7.3875	5.50607	1.3885	2.64485	2.29631
918	23.709	25.678	15.124	13.988	15.88	7.858	9.321	7.051	6.373	4.631	9.902	10.078	7.064	5.721	10.57	6.269	18.8758	8.07667	7.746	7.406	5.39841	1.15069	2.68793	2.1802
919	23.796	25.848	14.545	13.535	16.144	7.829	9.121	6.921	6.451	4.804	10.209	9.569	7.114	5.801	10.26	5.757	18.7736	7.957	7.75825	7.233	5.64603	1.10557	2.56395	2.11393
920	23.69	25.672	14.697	13.828	16.019	7.426	9.046	6.545	6.519	4.753	10.174	9.396	7.179	5.825	10.264	6.195	18.7812	7.67233	7.7105	7.36575	5.4869	1.26857	2.52165	2.01489
921	23.855	25.565	14.929	13.696	16.163	7.581	9.334	7.179	6.356	4.633	10.866	9.685	7.036	5.742	10.84	6.452	18.8416	8.03133	7.885	7.5175	5.4612	1.14591	2.88904	2.27732
922	23.566	25.659	14.674	13.486	15.703	7.627	9.132	6.611	6.332	4.701	10.438	9.857	7.028	5.721	10.9	6.334	18.6176	7.79	7.832	7.49575	5.57782	1.26838	2.76556	2.33146
923	23.627	25.593	14.376	13.835	15.698	7.651	8.946	6.541	6.344	4.621	10.65	9.633	6.968	5.791	10.756	6.224	18.6258	7.71267	7.812	7.43475	5.54839	1.20369	2.81116	2.26689
924	23.497	25.722	14.976	13.611	16.055	7.413	9.297	7.195	6.4	4.672	10.703	9.911	7.108	5.834	10.758	5.761	18.7722	7.96833	7.9215	7.36525	5.45563	1.15581	2.86176	2.34487
925	23.44	25.483	14.964	13.32	15.927	7.921	9.282	7.439	6.266	4.651	9.933	9.522	7.029	5.743	10.5	5.526	18.6268	8.214	7.593	7.1995	5.45531	0.955798	2.55688	2.29814
926	23.452	25.648	14.663	13.334	16.378	7.66	9.561	6.96	6.282	4.56	10.319	9.518	7.035	5.633	10.49	5.96	18.695	8.06033	7.66975	7.2795	5.5077	1.34592	2.70992	2.22255
927	23.509	25.551	14.928	13.716	16.068	7.683	9.889	7.055	6.354	4.657	10.678	9.334	6.984	5.731	10.576	6.164	18.7544	8.209	7.75575	7.36375	5.38618	1.48842	2.74454	2.20364
928	23.433	25.507	15.284	13.276	16.526	7.297	9.214	6.561	6.252	4.517	9.489	9.367	6.97	5.562	10.639	5.979	18.8052	7.69067	7.40625	7.2875	5.35015	1.36961	2.44011	2.31105
929	23.489	25.533	14.743	13.817	16.421	7.528	8.767	7.12	6.301	4.56	10.414	9.802	7.051	5.643	10.477	6.446	18.8006	7.805	7.76925	7.40425	5.34484	0.857729	2.80368	2.12813
930	23.335	25.535	15.056	13.942	15.378	7.568	9.408	6.971	6.183	4.536	10.408	9.601	6.927	5.619	10.198	6.035	18.6492	7.98233	7.682	7.19475	5.36518	1.27023	2.78436	2.07519
931	23.252	25.352	15.558	12.991	16.161	7.822	9.011	6.892	6.154	4.395	10.148	9.941	6.78	5.494	9.89	6.323	18.6628	7.90833	7.6595	7.12175	5.33559	1.06213	2.8473	1.92073
932	23.131	25.533	14.491	12.591	16.018	6.482	8.489	6.358	6.144	4.496	9.536	9.181	6.872	5.527	9.874	5.718	18.3528	7.10967	7.33925	6.99775	5.65574	1.19615	2.43108	2.00744
933	23.222	25.339	15.15	13.712	16.215	7.323	8.911	6.482	6.182	4.485	10.032	10.013	6.89	5.523	10.499	6.426	18.7276	7.572	7.678	7.3345	5.20045	1.2335	2.79445	2.18468
934	23.267	25.349	13.923	12.936	16.275	7.917	9.471	6.741	5.956	4.289	10.038	10.08	6.875	5.3	10.29	6.069	18.35	8.043	7.59075	7.1335	5.6209	1.36935	2.93026	2.20039
935	23.314	25.467	14.71	13.582	15.47	7.205	9.645	6.354	6.113	4.272	9.438	9.853	6.732	5.379	10.75	5.594	18.5086	7.73467	7.419	7.11375	5.46455	1.70824	2.6839	2.4958
936	23.265	25.369	14.485	13.198	15.225	6.928	9.036	6.599	6.005	4.28	10.46	10.214	6.815	5.273	10.652	5.559	18.3084	7.521	7.73975	7.07475	5.5826	1.3223	3.08226	2.47709
937	23.109	25.221	14.938	13.289	15.287	7.739	9.039	6.755	5.834	4.111	9.578	9.737	6.593	5.012	9.261	5.201	18.3688	7.84433	7.315	6.51675	5.39663	1.14564	2.79561	1.96063
938	22.891	25.199	14	12.596	15.614	7.158	8.351	6.316	5.702	3.935	9.053	8.737	6.692	5.163	9.474	4.982	18.06	7.275	6.85675	6.57775	5.6264	1.02253	2.46502	2.0776
939	22.895	24.76	13.704	12.463	15.546	6.724	6.724	5.31	5.402	3.891	8.994	7.88	6.342	4.906	9.165	4.797	17.8736	6.25267	6.54175	6.3025	5.58379	0.816373	2.31876	2.03406
940	22.262	24.825	14.266	11.549	15.308	6.612	9.103	7.292	5.494	3.706	8.696	8.197	6.099	4.605	9.466	5.48	17.642	7.669	6.52325	6.4125	5.63271	1.28758	2.34652	2.12593
941	22.358	24.636	14.749	12.684	15.339	6.637	8.555	6.588	5.423	3.626	9.931	8.8	5.873	4.697	10.374	6.195	17.9532	7.26	6.945	6.78475	5.21842	1.12177	2.92629	2.47794
942	22.392	24.523	12.84	12.35	13.819	6.148	7.617	5.114	5.605	3.757	8.868	8.705	6.085	4.348	9.14	5.005	17.1848	6.293	6.73375	6.1445	5.79968	1.25778	2.48837	2.12151
943	22.126	24.364	13.286	13.286	13.013	6.616	7.108	7.764	5.535	3.541	8.256	9.295	6.046	4.198	9.24	5.03	17.215	7.16267	6.65675	6.1285	5.56231	0.575949	2.61306	2.2077
944	22.499	24.534	12.179	11.415	13.981	6.718	8.083	4.369	5.274	3.574	7.865	8.793	6.177	4.724	9.94	4.697	16.9216	6.39	6.3765	6.3845	6.13429	1.8786	2.38919	2.46911
945	22.268	24.236	12.995	12.086	14.171	6.096	7.38	5.989	5.091	3.514	8.556	7.059	5.951	4.433	8.984	5.08	17.1512	6.48833	6.055	6.112	5.661	0.774057	2.20975	2.01315
946	21.961	24.241	13.181	11.209	14.167	7.006	8.822	6.175	5.28	3.36	8.199	7.732	6.018	4.231	8.614	5.449	16.9518	7.33433	6.14275	6.078	5.77015	1.3537	2.25403	1.8477
947	22.171	24.399	13.091	11.05	13.987	6.371	8.561	5.077	5.467	3.592	8.313	9.059	5.896	4.754	9.258	4.828	16.9396	6.66967	6.60775	6.184	5.94195	1.7611	2.53723	2.11471
948	22.039	24.366	13.191	12.624	16.265	6.95	7.707	5.579	5.574	3.666	8.7	10.165	6.301	4.878	10.071	6.95	17.697	6.74533	7.02625	7.05	5.27775	1.07866	2.94695	2.19203
949	22.156	24.36	13.643	11.943	14.378	6.431	8.819	5.834	5.339	3.466	7.901	8.268	6.018	4.626	8.774	5.191	17.296	7.028	6.2435	6.15225	5.56852	1.57951	2.26411	1.83893
950	22.183	24.143	13.419	11.752	14.274	6.368	7.564	5.855	5.537	3.703	8.077	7.692	6.117	4.635	8.205	4.915	17.1542	6.59567	6.25225	5.968	5.60275	0.876952	2.03411	1.62399
951	22.151	24.167	13.382	12.696	15.276	7.094	8.505	6.731	5.56	3.592	9.633	9.109	6.179	4.783	9.835	4.877	17.5344	7.44333	6.9735	6.4185	5.26919	0.937174	2.89055	2.36509
952	22.172	24.444	14.425	12.236	15.207	7.349	8.952	7.154	5.338	3.692	10.477	9.695	6.485	4.72	10.047	6.255	17.6968	7.81833	7.3005	6.87675	5.29802	0.986614	3.30134	2.25404
953	22.48	24.32	13.423	11.699	14.998	7.087	9.111	7.049	5.433	3.693	9.186	9.111	6.557	4.615	10.011	5.999	17.384	7.749	6.85575	6.7955	5.65197	1.17968	2.74125	2.29386
954	22.261	24.55	13.202	12.801	15.354	6.419	7.732	6.492	5.705	4.053	9.409	9.81	6.475	4.955	9.519	6.127	17.6336	6.881	7.24425	6.769	5.41847	0.737891	2.81795	1.94522
955	22.211	24.379	13.951	12.221	14.492	6.777	8.363	6.597	5.219	3.762	8.904	7.967	6.211	4.659	9.589	5.479	17.4508	7.24567	6.463	6.4845	5.45466	0.971815	2.38491	2.16458
956	22.141	24.548	13.725	12.238	14.773	7.606	8.959	6.525	5.486	3.718	8.553	8.621	6.29	4.827	10.007	5.409	17.485	7.69667	6.5945	6.63325	5.49063	1.21953	2.41146	2.32819
957	22.103	24.449	13.629	12.651	15.879	6.978	8.51	6.032	5.452	3.906	9.521	8.347	6.614	5.017	10.401	5.152	17.7422	7.17333	6.8065	6.796	5.25138	1.25049	2.58129	2.50976
958	22.038	24.33	14.882	12.844	16.888	7.538	9.9	6.988	5.391	3.864	9.673	9.641	6.618	4.848	10.903	6.729	18.1964	8.142	7.14225	7.2745	4.84057	1.54711	2.96997	2.56791
959	22.075	24.255	13.551	11.869	15.582	6.125	9.076	5.998	5.519	3.8	9.426	9.553	6.571	4.839	9.553	5.141	17.4664	7.06633	7.0745	6.526	5.42071	1.74158	2.87602	2.15476
960	22.291	24.288	13.678	11.922	14.972	7.024	8.256	6.593	5.409	3.986	9.612	9.304	6.44	5.078	9.242	6.685	17.4302	7.291	7.07775	6.86125	5.5027	0.863052	2.81201	1.73748
961	22.267	24.277	13.808	12.857	15.864	6.904	7.794	7.027	5.312	3.945	9.972	9.113	6.515	4.925	10.064	5.707	17.8146	7.24167	7.0855	6.80275	5.14835	0.482272	2.91266	2.26901
962	21.891	24.311	13.649	13.072	16.075	6.642	9.13	6.521	5.274	3.801	8.796	8.644	6.449	4.939	9.251	5.945	17.7996	7.431	6.62875	6.646	5.04207	1.47262	2.48929	1.84663
963	22.117	24.369	13.233	12.084	15.296	6.985	7.368	6.337	5.439	3.936	8.989	8.635	6.442	4.974	9.343	5.099	17.4198	6.89667	6.74975	6.4645	5.49695	0.521145	2.46331	2.0308
964	21.947	24.009	14.524	12.619	15.655	6.875	8.929	7.143	5.584	3.971	9.494	9.583	6.51	4.959	10.208	6.19	17.7508	7.649	7.158	6.96675	4.94755	1.11658	2.82677	2.26191
965	21.825	24.101	14.638	12.842	15.855	7.03	8.825	6.512	5.416	3.701	9.89	9.343	6.69	5.076	9.921	5.204	17.8522	7.45567	7.0875	6.72275	4.85419	1.21383	3.01129	2.2545
966	22.146	24.046	13.723	12.542	15.723	7.604	9.088	6.574	5.413	3.845	10.27	9.118	6.424	4.987	9.876	5.483	17.636	7.75533	7.1615	6.6925	5.15626	1.26381	3.03024	2.20442
967	21.759	23.675	14.015	11.733	16.148	6.578	9.57	6.578	5.295	3.895	10.044	9.215	6.532	4.771	9.274	5.63	17.466	7.57533	7.11225	6.55175	5.08663	1.72743	2.9816	1.95207
968	21.78	24.021	13.732	11.328	15.805	7.121	7.602	6.46	5.372	4.05	9.495	8.624	6.635	5.019	8.444	5.559	17.3332	7.061	6.88525	6.41425	5.38208	0.573359	2.59246	1.51072
969	21.941	24.086	14.367	11.972	16.073	7.094	8.441	7.213	5.315	3.993	10.087	9.967	6.533	5.019	10.416	5.627	17.6878	7.58267	7.3405	6.89875	5.13158	0.745716	3.14908	2.42595
970	21.706	23.868	12.817	11.813	15.623	6.97	8.299	6.497	5.367	3.919	9.333	8.653	6.66	4.978	9.51	5.523	17.1654	7.25533	6.818	6.66775	5.37303	0.934271	2.595	2.02024
971	21.719	24.096	14.169	11.994	15.982	7.462	8.55	6.707	5.345	3.769	9.426	8.369	6.576	5.026	8.943	6.224	17.592	7.573	6.72725	6.69225	5.12301	0.9265	2.623	1.64063
972	21.745	23.902	13.611	11.965	15.615	7.299	8.615	6.611	5.46	3.901	9.752	9.153	6.549	5.035	10.021	6.401	17.3676	7.50833	7.0665	7.0015	5.20172	1.01827	2.83823	2.12523
973	21.497	23.495	13.654	12.474	16.107	7.417	8.598	6.963	5.222	3.685	10.566	10.384	6.488	4.768	9.87	6.328	17.4454	7.65933	7.46425	6.8635	4.84495	0.844008	3.53347	2.14926
974	21.692	23.981	13.085	11.036	15.347	7.154	8.193	6.726	5.387	3.75	8.896	8.621	6.564	4.91	8.958	5.319	17.0282	7.35767	6.6635	6.43775	5.57616	0.754409	2.51222	1.82147
975	21.555	23.898	13.892	12.453	15.207	6.758	8.417	6.79	5.346	3.839	9.793	9.981	6.553	4.987	10.294	5.444	17.401	7.32167	7.23975	6.8195	5.02683	0.948721	3.11902	2.40785
976	21.61	23.677	13.986	12.203	16.02	7.416	8.949	7.76	5.124	3.67	10.106	9.199	6.379	4.695	10.075	6.289	17.4992	8.04167	7.02475	6.8595	4.94075	0.804378	3.11388	2.27895
977	21.487	23.851	14.146	11.72	15.186	6.963	8.255	6.112	5.162	3.681	9.389	7.971	6.513	4.955	9.389	5.419	17.278	7.11	6.55075	6.569	5.14775	1.07904	2.59723	1.99023
978	21.448	23.687	13.684	12.121	15.215	6.794	7.751	6.411	5.418	3.8	9.888	8.517	6.639	4.948	9.314	4.817	17.231	6.98533	6.90575	6.4295	5.05521	0.690186	2.7898	2.09438
979	21.545	23.962	13.211	12.093	16.365	7.427	9.629	7.033	5.311	3.754	11.042	9.037	6.487	4.805	10.516	6.145	17.4352	8.02967	7.286	6.98825	5.17247	1.399	3.34411	2.4613
980	21.572	23.603	14.116	11.736	14.479	7.24	8.099	6.116	5.173	3.905	8.893	9.223	6.616	4.985	8.231	4.76	17.1012	7.15167	6.7985	6.148	5.16803	0.994447	2.66331	1.61627
981	21.739	23.473	13.629	12.085	15.744	7.486	7.687	7.049	5.257	3.902	9.836	9.198	6.42	4.962	8.929	5.874	17.334	7.40733	7.04825	6.54625	5.02241	0.326194	2.9155	1.69855
982	21.148	23.617	12.989	12.719	15.891	7.355	8.907	6.579	4.985	3.553	9.548	9.953	6.192	4.626	9.109	6.849	17.2728	7.61367	7.00975	6.694	4.9057	1.18536	3.22253	1.86054
983	21.07	23.457	14.34	11.875	14.479	7.187	8.229	6.181	5.331	3.654	9.479	8.542	6.43	4.816	9.479	6.181	17.0442	7.199	6.7515	6.7265	4.94835	1.02405	2.72381	1.96738
984	21.392	23.404	14.574	12.348	15.339	6.713	8.939	6.33	5.285	3.668	8.765	8.313	6.656	4.923	9.496	5.843	17.4114	7.32733	6.50775	6.7295	4.73656	1.40882	2.44359	1.97554
985	21.231	23.582	13.289	12.09	16.955	7.79	9.27	7.684	5.121	3.619	9.975	9.059	6.344	4.824	10.751	6.591	17.4294	8.248	6.9435	7.1275	4.95439	0.886663	3.05718	2.53887
986	21.187	23.114	14.275	11.653	16.06	7.793	9.65	6.336	4.952	3.497	9.723	9.031	6.556	4.504	9.359	7.32	17.2578	7.92633	6.80075	6.93475	4.78224	1.66102	3.04665	2.00644
987	21.118	23.354	12.991	11.963	15.523	6.679	8.11	6.055	5.099	3.733	9.505	8.954	6.406	4.918	9.394	5.578	16.9898	6.948	6.82275	6.574	5.02384	1.05358	2.84339	1.97611
988	21.132	22.818	12.778	11.815	15.741	7.556	9	7.111	4.929	3.689	8.852	8.667	6.372	4.607	9.926	6.148	16.8568	7.889	6.53425	6.76325	4.92734	0.987546	2.61998	2.24974
989	21.037	23.207	13.524	12.472	14.951	6.499	8.077	7.438	5.295	3.548	9.842	8.302	6.598	4.698	9.128	5.334	17.0382	7.338	6.74675	6.4395	4.78541	0.793739	2.84833	1.95858
990	21.066	22.99	12.471	11.48	15.179	7.246	7.399	6.751	5.062	3.586	8.696	8.963	6.406	4.537	9.115	5.225	16.6372	7.132	6.57675	6.32075	5.14909	0.338708	2.67236	2.01639
991	21.112	23.27	13.129	11.851	15.298	6.313	8.792	6.352	4.927	3.474	9.876	8.443	6.368	4.591	9.179	5.655	16.932	7.15233	6.68	6.44825	5.01478	1.42013	2.98184	1.96147
992	20.773	22.875	13.929	11.429	15.675	7.183	9.841	6.389	4.936	3.482	9.841	9.246	6.414	4.444	9.881	6.151	16.9362	7.80433	6.87625	6.7225	4.76848	1.80793	3.14595	2.27958
993	21.124	22.991	13.616	12.67	15.631	7.24	9.585	6.705	4.96	3.773	9.914	9.214	6.305	4.811	9.297	6.17	17.2064	7.84333	6.96525	6.64575	4.60329	1.53186	3.05306	1.8919
994	20.878	22.912	13.282	11.034	16.183	6.906	8.418	5.558	4.805	3.464	9.685	9.481	6.389	4.678	8.909	5.966	16.8578	6.96067	6.85875	6.4855	4.99934	1.43078	3.19406	1.77197
995	20.586	23.125	13.834	10.713	14.298	7.17	7.507	5.272	4.929	3.49	8.393	8.351	6.458	4.471	9.743	5.146	16.5112	6.64967	6.29075	6.4545	5.14857	1.20493	2.47404	2.34241
996	20.752	22.663	12.12	11.529	15.034	5.617	7.939	6.926	5.094	3.451	9.333	8.066	6.439	4.879	8.615	6.461	16.4196	6.82733	6.486	6.5985	5.05159	1.16414	2.69263	1.53485
997	20.565	22.794	12.714	11.923	14.914	7.523	8.051	6.731	4.715	3.396	10.251	10.427	6.205	4.745	9.239	5.895	16.582	7.435	7.19725	6.521	4.84518	0.664385	3.66823	1.91776
998	20.723	22.781	14.528	10.907	15.333	7.018	9.79	7.242	4.943	3.293	10.192	9.209	6.286	4.436	9.611	6.035	16.8544	8.01667	6.90925	6.592	4.82672	1.53983	3.31706	2.17306
999	20.516	22.779	12.54	11.484	14.194	6.155	9.049	6.431	4.911	3.302	9.141	7.35	6.283	4.61	8.222	4.502	16.3026	7.21167	6.176	5.90425	5.03783	1.59715	2.5839	1.74707
1000	20.667	22.82	13.249	12.032	15.232	7.165	8.653	6.985	4.839	3.211	9.869	10.23	6.216	4.353	10.635	7.03	16.8	7.601	7.03725	7.0585	4.71689	0.915493	3.54424	2.6345
