# Supplementary material for: Molecular basis of wax-based color change and UV reflection in dragonflies
Source: eLife. 2019 Jan 15;8:e43045. doi: 10.7554/eLife.43045 (PMC6353593; doi:10.7554/eLife.43045)
Supplement: Figure 7—source data 6. [file elife-43045-fig7-data6.xlsx]

## Sheet: Cservilia-CRAIC
	Male	Male	Male	Male	Male	Male	Male	Male	Male	Male	Male	Male	Male	Male	Male	Male	Male	Male	Male	Male	Male	Male	Male	Male	Male	Male	Male	Male	Male	Male	Male	Male	Male	Female	Female	Female	Female	Female	Female	Female	Female	Female	Female	Female	Female	Female	Female	Female	Female
wavelength	M5D1-1	M5D1-2	M5D1-3	M5D1-4	M5D1-5	M5D2-1	M5D2-2	M5D2-3	M5D2-4	M5D2-5	M5D2-6	M5D2-7	M5D3-1	M5D3-2	M5D3-3	M5D3-4	M5D3-5	M5D3-6	M5V1-1	M5V1-2	M5V1-3	M5V1-4	M5V1-5	M5V2-1	M5V2-2	M5V2-3	M5V2-4	M5V2-5	M5V3-1	M5V3-2	M5V3-3	M5V3-4	M5V3-5	F5D1-1	F5D1-2	F5D1-3	F5D1-4	F5D1-5	F5D2-1	F5D2-2	F5D2-3	F5D2-4	F5D2-5	F5V1-1	F5V1-2	F5V1-3	F5V1-4	F5V1-5	F5V2-1
380	15.3564	15.7413	15.2519	15.2501	15.4624	15.9287	15.8225	15.2597	16.6549	16.2898	16.4986	16.1688	15.9577	15.9139	17.1303	15.8002	15.6629	15.7555	18.0175	21.3875	18.0199	17.8428	17.1343	13.6984	13.5612	13.4435	13.3022	13.2558	16.9934	16.8123	18.3986	19.0005	21.1985	17.0639	17.4081	18.3697	18.384	18.3993	19.4049	17.8282	21.4379	21.9186	22.3195	23.2697	22.2787	24.9669	25.6521	21.6891	23.4096
381	15.2518	15.6006	15.0087	15.2676	15.4924	15.7771	15.7894	15.0255	16.3664	16.1178	16.1238	15.9461	15.6703	15.6449	16.9697	15.5407	15.5154	15.586	17.899	21.3878	17.9581	17.8258	17.0104	13.7079	13.6488	13.4667	13.2892	13.1335	16.7638	16.6264	18.1291	18.7696	20.9856	17.042	17.1865	18.196	18.1989	18.3049	19.0616	17.6161	21.0905	21.5976	22.0814	22.9673	22.1092	24.9019	25.4179	21.37	23.2341
382	14.9325	15.2899	14.9665	15.0589	15.1891	15.5103	15.3021	14.7643	16.0599	15.8537	15.7836	15.5725	15.1719	15.3362	16.4855	15.2054	15.1767	15.1972	17.5701	21.2927	17.6968	17.684	16.8623	13.3885	13.3488	13.1941	12.9909	12.763	16.4604	16.3239	17.8477	18.3762	20.7214	16.7142	16.6384	17.6752	17.6321	17.6996	18.5612	17.3221	20.693	21.2646	21.5034	22.703	22.0303	24.5702	25.0429	20.9932	22.9675
383	14.6021	15.0028	14.6999	14.5898	14.8656	15.1005	14.9072	14.4838	15.564	15.4838	15.4898	15.0628	14.7333	14.8391	16.0366	14.8168	14.8219	14.8453	17.3101	20.8889	17.3185	17.4141	16.5586	13.1687	13.0067	13.0155	12.7998	12.7006	16.082	15.9161	17.5298	18.0208	20.3984	16.3965	16.2206	17.1617	17.2351	17.3174	18.1913	16.9294	20.2999	20.8474	21.0593	22.3783	21.7835	24.2414	24.594	20.5133	22.5529
384	14.3598	14.8301	14.6165	14.3235	14.5077	14.8265	14.7418	14.202	15.3596	15.1358	15.1164	14.6086	14.4738	14.594	15.609	14.5448	14.401	14.5503	17.1058	20.6248	17.1528	17.2207	16.2718	13.0227	12.8623	12.8459	12.6541	12.5495	15.6835	15.5756	17.0624	17.6106	20.1407	15.9225	15.8885	16.8907	16.9871	16.9503	17.7416	16.5554	19.9347	20.412	20.7942	21.9885	21.3591	23.9579	24.1011	20.1881	22.1633
385	14.1545	14.6613	14.3304	14.1764	14.2304	14.653	14.4744	14.0425	15.0442	14.8752	14.7463	14.2765	14.1861	14.2431	15.2337	14.2257	14.071	14.1822	16.915	20.5552	16.9142	16.956	16.1319	12.8861	12.7142	12.6104	12.6449	12.382	15.2994	15.1934	16.591	17.1141	19.7215	15.5396	15.5311	16.6074	16.6217	16.6755	17.3251	16.1225	19.4367	20.1346	20.4735	21.4279	21.1603	23.3968	23.758	19.8989	21.7678
386	13.9619	14.2921	13.8913	13.8651	13.9631	14.286	14.0087	13.6083	14.7333	14.5166	14.3888	13.9902	13.6745	13.7691	14.9152	13.789	13.6825	13.6762	16.5685	20.3552	16.5911	16.6221	15.7699	12.6844	12.4472	12.3512	12.4817	12.1891	15.0814	14.8	16.1871	16.7475	19.3192	15.0945	15.098	16.2912	16.1945	16.1892	16.7935	15.6397	19.066	19.5594	20.1428	21.0274	20.8613	22.9488	23.4371	19.3855	21.3571
387	13.5772	13.9703	13.6676	13.5145	13.6754	13.9129	13.5515	13.1354	14.4185	14.1483	14.0499	13.7105	13.4095	13.3822	14.6048	13.3877	13.3316	13.3904	16.2663	20.1075	16.257	16.29	15.3792	12.5127	12.2636	12.2908	12.2566	12.0905	14.6415	14.4344	15.7661	16.4416	19.1082	14.7091	14.6516	15.8762	15.8396	15.8854	16.4854	15.2318	18.9543	19.1772	19.86	20.7485	20.7428	22.6042	23.1941	19.0839	21.1185
388	13.4697	13.8677	13.4521	13.3539	13.4504	13.7865	13.2556	12.874	14.2023	13.8405	13.8673	13.4473	13.134	13.2112	14.3796	13.1663	13.1729	13.1995	16.0278	19.8334	15.9873	16.1672	15.0289	12.3889	12.2913	12.2069	12.053	12.0076	14.3476	14.2546	15.5556	16.127	18.9539	14.502	14.3716	15.7033	15.583	15.6701	16.3097	15.0387	18.7812	18.9103	19.6875	20.4608	20.5492	22.3986	23.0941	18.9156	20.9031
389	13.3716	13.6857	13.3743	13.235	13.2719	13.7487	13.1053	12.715	14.0002	13.651	13.7879	13.3545	12.8891	12.9909	14.1908	12.9323	12.9741	12.9762	15.8658	19.8116	15.8564	15.9337	15.018	12.2841	12.2595	12.1641	12.0626	11.9434	14.1335	14.1161	15.4384	15.9017	18.8166	14.3415	14.1878	15.5279	15.3894	15.5427	16.083	14.8343	18.5833	18.7299	19.5109	20.238	20.3686	22.1441	22.944	18.734	20.7266
390	13.2708	13.5984	13.3006	13.1204	13.2588	13.6041	13.1555	12.6871	13.8764	13.5823	13.7052	13.1985	12.7367	12.8926	14.0988	12.8062	12.7838	12.857	15.8132	19.7901	15.8248	15.8258	15.0753	12.4625	12.3364	12.2354	12.2454	12.0222	14.0898	13.9758	15.3309	15.8803	18.7612	14.2557	14.1176	15.3889	15.1697	15.3699	15.9509	14.7298	18.4873	18.6236	19.451	20.1226	20.3381	22.0493	22.7834	18.6653	20.7362
391	13.0787	13.3292	13.0773	12.9548	12.9452	13.3969	12.9306	12.5598	13.6772	13.3322	13.5185	12.9591	12.4985	12.6835	13.903	12.7591	12.6144	12.6558	15.5339	19.7738	15.7186	15.6668	14.9021	12.3767	12.2813	12.1691	12.0995	12.0392	13.8489	13.7265	15.0385	15.6579	18.6448	14.1229	14.006	15.1966	14.9941	15.1124	15.7595	14.514	18.4855	18.4083	19.3027	20.004	20.2123	21.942	22.443	18.5705	20.6288
392	12.9033	13.2034	12.9751	12.9469	12.7817	13.2856	12.8052	12.5058	13.6345	13.247	13.4318	12.9048	12.3956	12.5406	13.7521	12.6671	12.58	12.4936	15.365	19.7059	15.6905	15.5898	14.655	12.2852	12.2965	12.1339	12.0851	12.0316	13.7011	13.6404	14.9854	15.5649	18.6086	14.0463	13.891	15.2218	14.8947	15.0224	15.5725	14.5589	18.4318	18.3732	19.177	19.9635	20.217	21.9337	22.333	18.5021	20.4823
393	12.7025	13.0881	12.8157	12.8641	12.7181	13.1593	12.6946	12.4077	13.4789	13.0654	13.2831	12.8219	12.4315	12.4123	13.6717	12.5153	12.5114	12.3559	15.2108	19.7041	15.7089	15.5702	14.4912	12.1937	12.2592	12.1095	12.1134	11.9877	13.5885	13.4845	14.9783	15.3679	18.5496	13.9031	13.8056	15.1772	14.7497	14.8917	15.3872	14.5557	18.3274	18.2506	19.0317	19.7538	20.1297	21.8418	22.2692	18.3702	20.3755
394	12.5615	12.9554	12.6517	12.7386	12.6991	13.1463	12.5736	12.356	13.3179	12.8833	13.2542	12.6988	12.4484	12.328	13.5746	12.5158	12.3576	12.2894	14.9687	19.6311	15.562	15.4844	14.3785	12.1732	12.2595	12.148	12.0207	11.8972	13.47	13.3383	14.8132	15.2696	18.4986	13.854	13.7447	15.0625	14.6251	14.8393	15.3258	14.4339	18.308	18.1616	19.0088	19.5885	20.0406	21.6855	22.0936	18.308	20.4144
395	12.4239	12.7815	12.3665	12.3887	12.4407	12.9435	12.3926	12.1035	13.1567	12.6095	13.0272	12.4643	12.1601	12.1161	13.3526	12.3275	12.1874	12.0476	14.7053	19.5402	15.3275	15.3252	14.1523	12.1532	12.3078	11.9984	11.8837	11.6801	13.2764	13.1008	14.6728	15.1377	18.339	13.7337	13.5892	14.8368	14.4072	14.6981	15.0633	14.0973	18.1137	17.9559	18.9481	19.4803	19.8928	21.5132	21.9309	18.0879	20.2764
396	12.3461	12.6884	12.2287	12.1259	12.2779	12.7332	12.2402	11.8987	13.0173	12.5648	12.8086	12.3036	11.9314	11.9948	13.1564	12.1029	12.034	11.8869	14.5541	19.4286	15.1258	15.1524	14.02	12.1087	12.1904	11.8295	11.8765	11.6629	13.2172	12.96	14.4886	15.0102	18.2381	13.6045	13.3706	14.6688	14.2882	14.4461	14.8963	13.9646	17.9215	17.7857	18.835	19.3285	19.7909	21.3168	21.795	17.9366	20.0809
397	12.142	12.4937	12.1013	12.0176	12.1652	12.5894	12.0422	11.7153	12.9145	12.4496	12.6161	12.1179	11.7586	11.7482	13.0485	11.9508	11.9348	11.7691	14.4346	19.3227	14.9653	14.9856	13.9525	11.9748	12.1041	11.8	11.7721	11.5938	13.0098	12.7471	14.2907	14.8798	18.076	13.4259	13.1594	14.4806	14.0637	14.3017	14.6789	13.8532	17.7897	17.6179	18.7336	19.1561	19.7302	21.0752	21.5943	17.8358	19.99
398	11.94	12.3111	11.9723	12.0196	12.0471	12.5526	11.9254	11.6266	12.8301	12.2912	12.5505	12.0472	11.6923	11.6695	12.8787	11.8371	11.8127	11.6208	14.248	19.3015	14.8884	14.9234	13.8419	11.9334	11.9855	11.7986	11.6912	11.5849	12.8205	12.6559	14.1574	14.7169	18.0044	13.2329	13.0943	14.3493	13.9017	14.1139	14.5781	13.722	17.6542	17.4902	18.5724	19.0332	19.7167	21.0159	21.3814	17.8061	19.9298
399	11.8786	12.2172	11.9432	11.8856	11.8938	12.5195	11.8065	11.4982	12.6847	12.1771	12.4779	11.9685	11.5322	11.6359	12.7941	11.702	11.6857	11.5087	14.1589	19.3595	14.7925	14.8753	13.7255	11.9857	12.0075	11.7774	11.6559	11.5721	12.736	12.5284	14.0028	14.5234	17.9747	13.1002	13.0143	14.2411	13.7801	14.0328	14.4837	13.6109	17.5678	17.4582	18.4473	18.9638	19.6942	20.8977	21.2446	17.7454	19.8409
400	11.7606	12.1293	11.9352	11.7382	11.8698	12.4518	11.7171	11.4002	12.5436	12.0428	12.3213	11.893	11.3925	11.5207	12.7144	11.6671	11.565	11.3937	14.1632	19.2582	14.7269	14.8503	13.6133	11.9521	11.9907	11.6818	11.7265	11.5485	12.6428	12.4179	13.9884	14.4077	17.9734	13.0155	12.9068	14.0929	13.7096	14.0683	14.2882	13.5123	17.5416	17.3004	18.3882	18.8497	19.6147	20.8396	21.0889	17.5865	19.7749
401	11.6656	11.9516	11.7345	11.663	11.7368	12.4251	11.6036	11.3121	12.4477	11.9394	12.2143	11.6941	11.2839	11.3371	12.576	11.5147	11.4059	11.3263	14.1143	19.1162	14.6916	14.7294	13.5186	11.963	11.9466	11.6515	11.7166	11.5116	12.5369	12.3364	13.8696	14.2661	17.9783	12.9394	12.6728	14.0051	13.5056	13.9294	14.0913	13.4046	17.5347	17.147	18.3239	18.8261	19.4649	20.7185	20.9499	17.2981	19.6689
402	11.6183	11.8561	11.6052	11.6256	11.5921	12.3594	11.4683	11.2411	12.3292	11.8164	12.0924	11.6581	11.226	11.2486	12.414	11.4023	11.3228	11.2572	14.0575	18.9678	14.6329	14.6664	13.3899	11.8844	11.9535	11.7157	11.6769	11.5157	12.4165	12.2271	13.7661	14.1787	17.9373	12.8581	12.594	13.9411	13.4074	13.7827	14.0093	13.3109	17.4293	17.0853	18.2769	18.7659	19.3922	20.6555	20.8743	17.2664	19.5482
403	11.4599	11.6606	11.3959	11.3947	11.35	12.0278	11.3147	11.0296	12.0736	11.6206	11.8703	11.477	10.9962	11.0207	12.1576	11.1724	11.0346	11.0452	13.736	18.8053	14.507	14.5415	13.2776	11.7382	11.8872	11.6293	11.5707	11.2998	12.1182	11.9252	13.481	13.8935	17.6253	12.6339	12.3916	13.7939	13.1677	13.5117	13.7005	13.0085	17.1666	16.8923	18.0737	18.5357	19.288	20.3466	20.6805	17.1051	19.4124
404	11.2846	11.4959	11.2999	11.2224	11.2296	11.9161	11.2286	10.8844	11.9638	11.5074	11.6907	11.2556	10.8369	10.8334	12.0416	11.0794	10.8331	10.8632	13.4862	18.6887	14.4062	14.4053	13.1804	11.6965	11.8183	11.5488	11.4716	11.2204	11.9667	11.6655	13.2762	13.7783	17.5482	12.4428	12.1775	13.6443	12.9986	13.2025	13.5205	12.7608	17.0583	16.72	17.9453	18.3933	19.1469	20.1388	20.4906	16.855	19.3893
405	11.2446	11.4628	11.2338	11.15	11.1892	11.8636	11.1666	10.8642	11.8623	11.4924	11.5503	11.1053	10.727	10.7445	11.9878	11.0443	10.783	10.7539	13.4622	18.6972	14.2732	14.3314	13.0879	11.6553	11.8988	11.5538	11.517	11.2157	11.8267	11.6017	13.2024	13.7572	17.5395	12.3415	12.1113	13.5188	12.8879	13.1962	13.503	12.7362	17.0042	16.6892	17.9391	18.3995	19.0544	20.0538	20.2423	16.7622	19.3045
406	11.2328	11.431	11.2411	11.1382	11.1351	11.852	11.0992	10.8081	11.7929	11.4266	11.4913	11.0857	10.6887	10.7335	11.9473	10.9231	10.7722	10.6953	13.4625	18.5768	14.2016	14.2765	13.0705	11.668	11.9753	11.6349	11.545	11.3121	11.8084	11.4998	13.1279	13.6782	17.5062	12.2997	12.0813	13.4265	12.8157	13.1464	13.3882	12.6881	16.8885	16.6195	17.9905	18.3116	19.0864	19.9895	20.1108	16.7684	19.2123
407	11.1127	11.3964	11.166	11.0882	11.002	11.7292	10.9312	10.6079	11.6812	11.276	11.365	10.9915	10.5367	10.5779	11.7633	10.7932	10.6406	10.5703	13.3393	18.4452	14.113	14.161	12.9434	11.6519	11.8346	11.5951	11.5221	11.3377	11.7394	11.3484	13.0146	13.4889	17.4303	12.1872	11.9387	13.2505	12.6275	12.9384	13.1751	12.5193	16.7192	16.4951	17.8409	18.1568	18.937	19.8518	19.9572	16.6346	19.0364
408	11.0328	11.3352	11.0949	11.0569	10.9434	11.6237	10.8377	10.4992	11.5953	11.1659	11.2888	10.9342	10.4014	10.4655	11.6383	10.7568	10.5093	10.4097	13.2036	18.3937	14.0397	14.1354	12.8555	11.7345	11.83	11.6299	11.5365	11.353	11.6212	11.2444	12.9478	13.3633	17.3311	12.0916	11.8352	13.1874	12.501	12.8857	13.05	12.3568	16.596	16.4013	17.7291	18.1014	18.8816	19.7144	19.8887	16.4245	18.943
409	10.9666	11.2293	11.0312	10.9295	10.8954	11.5426	10.7326	10.4187	11.5451	11.0008	11.2005	10.841	10.2578	10.3805	11.5454	10.5901	10.3617	10.2596	13.0951	18.2621	13.9501	14.0956	12.7807	11.7136	11.8642	11.609	11.4749	11.3616	11.4931	11.1014	12.8684	13.2304	17.2574	11.9764	11.6416	13.0423	12.3444	12.787	12.9599	12.242	16.4538	16.291	17.6486	17.9323	18.8566	19.566	19.7089	16.2686	18.8209
410	10.8912	11.091	10.8784	10.7751	10.7157	11.4496	10.6421	10.3001	11.4146	10.8501	11.0843	10.7249	10.1212	10.2425	11.389	10.416	10.2328	10.2175	12.9746	18.1675	13.8774	13.9964	12.6631	11.6273	11.8345	11.5508	11.4561	11.2912	11.3316	10.9147	12.7442	13.1315	17.1698	11.8732	11.5302	12.9198	12.1857	12.6211	12.879	12.1616	16.3583	16.2079	17.545	17.7728	18.728	19.4841	19.536	16.1631	18.7109
411	10.829	11.0095	10.7167	10.7017	10.6135	11.3316	10.5756	10.1843	11.3064	10.7764	10.9445	10.6049	10.0199	10.1697	11.2798	10.3478	10.1359	10.1225	12.841	18.0972	13.8061	13.8649	12.5444	11.5773	11.8092	11.5133	11.4038	11.2489	11.2506	10.7977	12.6129	13.0325	17.0624	11.7308	11.424	12.7947	12.0907	12.4895	12.7677	12.0388	16.2627	16.1132	17.4692	17.6858	18.6077	19.4004	19.3951	16.0421	18.612
412	10.6798	10.8751	10.5926	10.5962	10.5395	11.2187	10.4114	10.0648	11.1724	10.659	10.7746	10.5008	9.936	10.0295	11.18	10.2799	10.0609	9.962	12.731	17.9889	13.6493	13.7508	12.4365	11.5297	11.7517	11.4573	11.3196	11.2325	11.1122	10.6522	12.4799	12.8941	16.9523	11.6005	11.3111	12.641	11.9014	12.3825	12.5937	11.9155	16.128	16.0435	17.3695	17.6348	18.5032	19.2586	19.3074	15.8877	18.4614
413	10.6152	10.8055	10.5584	10.5713	10.5316	11.1974	10.3188	10.0205	11.0955	10.5844	10.7077	10.4163	9.8649	9.9589	11.0788	10.1874	10.0538	9.8834	12.6654	18.0346	13.6023	13.7709	12.3934	11.6024	11.7954	11.4842	11.3672	11.2713	11.0206	10.5712	12.3842	12.7995	16.854	11.5598	11.2071	12.5586	11.8557	12.2632	12.5566	11.8567	16.1017	15.988	17.2507	17.5495	18.4139	19.1576	19.2464	15.8575	18.3712
414	10.566	10.8057	10.5764	10.5246	10.4207	11.1495	10.2726	9.9954	11.0902	10.5453	10.6766	10.3734	9.7724	9.9075	11.0944	10.1621	9.9828	9.8628	12.5981	17.9998	13.5999	13.7461	12.378	11.6858	11.8873	11.5478	11.494	11.3247	10.9847	10.5363	12.3943	12.7503	16.8412	11.5365	11.1502	12.5292	11.789	12.1934	12.5278	11.8143	16.0603	16.0055	17.1879	17.4866	18.367	19.1514	19.1993	15.7601	18.353
415	10.4762	10.7335	10.5122	10.4308	10.3723	11.0845	10.2108	9.9142	11.0406	10.4909	10.652	10.3017	9.7103	9.8139	11.0502	10.0959	9.9082	9.8135	12.4876	17.8961	13.5549	13.6804	12.3185	11.8027	11.9538	11.5723	11.5609	11.3862	10.9826	10.4877	12.3586	12.7079	16.8167	11.5161	11.1364	12.4989	11.7422	12.1397	12.4689	11.761	16.0055	15.9883	17.1561	17.4411	18.3915	19.0858	19.0965	15.6524	18.3383
416	10.3827	10.5962	10.3982	10.3426	10.2935	11.0432	10.1473	9.8338	10.9212	10.3961	10.5528	10.2054	9.5884	9.7529	10.9521	10.0219	9.8607	9.744	12.3891	17.779	13.4466	13.5472	12.2257	11.779	11.9532	11.4996	11.5228	11.3566	10.883	10.3641	12.2488	12.6605	16.6692	11.4121	11.0602	12.432	11.6655	12.0506	12.3913	11.724	15.8972	15.8977	17.0936	17.3628	18.3161	19.0028	18.9582	15.5695	18.2745
417	10.2698	10.4898	10.2632	10.2205	10.1518	10.9566	10.0324	9.715	10.7621	10.272	10.4363	10.0683	9.5038	9.6383	10.8028	9.8998	9.7658	9.603	12.2122	17.6731	13.3354	13.4352	12.0948	11.7031	11.9281	11.4493	11.4308	11.2322	10.7428	10.2534	12.1317	12.5327	16.574	11.2926	10.9112	12.3105	11.5672	11.9541	12.2624	11.5848	15.7729	15.7805	16.9318	17.2092	18.2401	18.8694	18.8104	15.426	18.1383
418	10.1481	10.4017	10.1532	10.157	10.0636	10.8622	9.9326	9.6218	10.6885	10.196	10.3493	10.0041	9.3955	9.5233	10.7181	9.8213	9.703	9.4958	12.1239	17.5522	13.2063	13.3821	12.0206	11.6077	11.8518	11.38	11.3958	11.1596	10.6208	10.1283	12.0464	12.4176	16.4655	11.207	10.7973	12.2597	11.4189	11.8531	12.1252	11.4944	15.6636	15.7339	16.8113	17.0911	18.12	18.7058	18.7168	15.2961	18.0168
419	9.9817	10.2284	9.9982	9.9771	9.9007	10.6556	9.7629	9.433	10.5296	10.0159	10.1522	9.8137	9.2537	9.3676	10.5913	9.6959	9.5287	9.3383	11.9385	17.3933	13.0751	13.2194	11.859	11.4635	11.7129	11.2498	11.2694	11.0522	10.4518	9.9841	11.912	12.2945	16.3124	11.0181	10.6545	12.0596	11.2271	11.7365	12.0127	11.3293	15.5041	15.5788	16.6487	16.8783	17.9131	18.5438	18.5627	15.1372	17.768
420	9.8436	10.1021	9.8699	9.8413	9.769	10.5887	9.6614	9.3546	10.4157	9.9059	10.0359	9.7007	9.1994	9.2915	10.448	9.5642	9.4362	9.2731	11.8396	17.2973	12.9977	13.109	11.7652	11.4183	11.6232	11.1793	11.1796	11.0182	10.348	9.8834	11.8152	12.2511	16.1661	10.8895	10.5916	11.9486	11.1229	11.6157	11.9212	11.28	15.4223	15.4955	16.5815	16.7783	17.8245	18.4775	18.4395	15.0633	17.6801
421	9.8051	10.0598	9.8088	9.7444	9.646	10.5963	9.5869	9.309	10.3327	9.8762	9.9828	9.6706	9.1693	9.2587	10.3637	9.513	9.4569	9.2168	11.7799	17.2183	12.922	13.0194	11.6985	11.4335	11.6349	11.1916	11.1642	11.0257	10.3037	9.8166	11.7113	12.1694	16.1108	10.7998	10.5874	11.8663	11.1353	11.5354	11.8507	11.2762	15.3546	15.4827	16.4832	16.7624	17.7513	18.4504	18.3965	14.9849	17.6868
422	9.7083	9.9566	9.6793	9.6453	9.566	10.5153	9.4767	9.2331	10.2539	9.8205	9.9528	9.5789	9.0941	9.1288	10.3444	9.4798	9.3631	9.1737	11.6935	17.1354	12.8064	12.9463	11.5799	11.3817	11.5961	11.1596	11.1388	11.0196	10.2294	9.7218	11.6154	12.0923	15.9875	10.796	10.5289	11.7808	11.1052	11.4829	11.7776	11.1979	15.2363	15.4293	16.4325	16.7011	17.7096	18.382	18.2997	14.8966	17.6038
423	9.5858	9.8089	9.5651	9.5181	9.4697	10.3987	9.414	9.1301	10.1324	9.7265	9.8324	9.5122	8.9715	9.0257	10.2361	9.3901	9.2444	9.0783	11.5346	17.0106	12.6713	12.8115	11.465	11.3467	11.5225	11.1272	11.1058	10.9113	10.1334	9.656	11.519	11.9961	15.8911	10.7551	10.4038	11.6816	10.9782	11.3655	11.7189	11.103	15.1699	15.3095	16.3861	16.6383	17.6728	18.2866	18.1978	14.8177	17.4847
424	9.434	9.6401	9.3882	9.3811	9.3192	10.2643	9.2662	8.9979	10.0195	9.5443	9.6755	9.3757	8.8404	8.9083	10.1013	9.2662	9.1328	8.9624	11.389	16.8802	12.5479	12.6643	11.3261	11.2017	11.4588	10.9857	10.9749	10.7798	9.9978	9.498	11.4168	11.851	15.7444	10.5737	10.2481	11.5525	10.8028	11.1978	11.5791	10.9864	15.0356	15.1895	16.199	16.4538	17.5292	18.0817	18.1138	14.6769	17.3808
425	9.2418	9.5117	9.2279	9.2404	9.1547	10.069	9.0902	8.8115	9.9076	9.3716	9.5094	9.242	8.6719	8.7689	9.956	9.0898	9.0069	8.7732	11.1695	16.7122	12.3461	12.5391	11.1255	11.0424	11.3563	10.8517	10.8343	10.6945	9.797	9.3543	11.3122	11.6781	15.6132	10.3603	10.0475	11.3851	10.6468	10.9781	11.3891	10.8468	14.8253	15.0586	15.9701	16.2524	17.3514	17.8716	17.9028	14.5273	17.1577
426	9.0779	9.3522	9.1222	9.0843	9.0016	9.9538	8.9755	8.6635	9.7741	9.2862	9.3733	9.1105	8.5414	8.6655	9.7989	8.9245	8.8429	8.6019	11.0166	16.5515	12.2404	12.4323	10.9867	10.894	11.219	10.7521	10.7142	10.5833	9.6206	9.1974	11.1681	11.5569	15.4663	10.2322	9.893	11.2318	10.5032	10.8287	11.2298	10.7151	14.6656	14.9235	15.8271	16.099	17.2069	17.6579	17.7118	14.3321	16.9555
427	8.9088	9.1461	8.9493	8.8776	8.7922	9.7752	8.7954	8.482	9.563	9.1426	9.2182	8.9325	8.3461	8.4432	9.6093	8.7356	8.6747	8.4698	10.8118	16.313	12.147	12.2657	10.7985	10.7099	10.9856	10.5725	10.5101	10.376	9.4567	9.0144	10.9944	11.3803	15.206	10.1144	9.796	11.0367	10.3266	10.664	11.0183	10.5867	14.3827	14.7375	15.6622	15.8623	17.0402	17.4437	17.4834	14.1317	16.7169
428	8.723	8.9846	8.7399	8.6918	8.6122	9.6151	8.6582	8.3425	9.4513	8.9929	9.0718	8.7955	8.176	8.3033	9.4722	8.5831	8.5446	8.3569	10.6545	16.0994	11.9359	12.0835	10.6527	10.5852	10.8332	10.4342	10.3829	10.2038	9.2981	8.8576	10.8073	11.2364	14.9912	9.9516	9.6753	10.87	10.2065	10.5148	10.8403	10.4037	14.2166	14.5249	15.4423	15.6943	16.8401	17.2758	17.2713	13.9647	16.546
429	8.5883	8.8307	8.5979	8.577	8.5144	9.5018	8.5294	8.223	9.3326	8.8442	8.9306	8.6239	8.0709	8.1924	9.3309	8.4948	8.4249	8.2499	10.535	15.9871	11.8298	11.9237	10.4912	10.4546	10.7191	10.3065	10.3256	10.1007	9.188	8.7297	10.6788	11.1332	14.8549	9.8141	9.5599	10.7542	10.1161	10.3797	10.743	10.2792	14.1005	14.355	15.3023	15.574	16.7274	17.123	17.1468	13.8429	16.3969
430	8.472	8.7064	8.4673	8.4436	8.3812	9.3697	8.3911	8.0965	9.1463	8.7035	8.754	8.4705	7.8984	7.9951	9.1384	8.3446	8.2666	8.0709	10.4078	15.8645	11.7084	11.8056	10.317	10.2885	10.5831	10.1665	10.1101	9.9518	9.0375	8.5504	10.5724	11.0367	14.7144	9.6303	9.3748	10.6212	9.9429	10.2388	10.5862	10.1199	13.9014	14.2176	15.1173	15.3816	16.5809	16.9011	17.0047	13.6782	16.2079
431	8.3407	8.517	8.3387	8.2859	8.1969	9.2083	8.1986	8.0054	8.9757	8.553	8.6024	8.3117	7.7165	7.8207	8.9695	8.1366	8.1094	7.9004	10.2237	15.6856	11.5254	11.6377	10.1665	10.1147	10.4281	10.0037	9.91	9.7771	8.8892	8.4223	10.4208	10.8408	14.4859	9.4385	9.1786	10.4102	9.7714	10.0759	10.4392	9.9227	13.6498	14.0135	14.8946	15.1278	16.3404	16.6669	16.7878	13.4809	15.9766
432	8.2003	8.3836	8.1438	8.1484	8.103	9.0457	8.0471	7.869	8.8638	8.3767	8.4866	8.1762	7.5545	7.7352	8.803	8.0028	7.9672	7.7543	10.0724	15.4627	11.3738	11.5085	10.0044	9.9785	10.3028	9.8751	9.8227	9.6274	8.7512	8.2302	10.2162	10.645	14.281	9.3089	9.0189	10.226	9.5997	9.8913	10.2897	9.7906	13.4454	13.8407	14.6599	14.9732	16.1597	16.4261	16.5991	13.2591	15.7407
433	8.0585	8.3101	8.0519	8.0624	8.0208	8.9613	7.9693	7.7884	8.7299	8.2865	8.393	8.0775	7.4729	7.6261	8.7005	7.9381	7.8851	7.6616	9.975	15.401	11.2586	11.4165	9.9311	9.8946	10.2123	9.7796	9.7467	9.5379	8.6322	8.1435	10.1648	10.5379	14.2137	9.2368	8.9343	10.1318	9.516	9.7509	10.1759	9.6821	13.3373	13.7233	14.564	14.8562	16.0881	16.3354	16.47	13.1313	15.6058
434	7.9336	8.1668	7.9165	7.9189	7.8758	8.8532	7.8908	7.6177	8.5887	8.1685	8.2883	7.9452	7.3415	7.4611	8.5399	7.793	7.7486	7.5006	9.8259	15.3085	11.1325	11.2763	9.8032	9.7402	10.1128	9.6302	9.6021	9.4378	8.4713	8.0167	10.079	10.4518	14.0675	9.0877	8.787	10.0027	9.3983	9.6101	10.0427	9.5355	13.1537	13.5815	14.4182	14.6626	15.9543	16.1924	16.3138	12.9957	15.4546
435	7.846	8.0613	7.8492	7.7973	7.7545	8.7495	7.7569	7.5161	8.4932	8.0304	8.193	7.841	7.2184	7.3486	8.3965	7.6951	7.6667	7.4069	9.6974	15.1841	11.0124	11.1822	9.6712	9.638	10.0092	9.5139	9.4469	9.3736	8.3318	7.8975	9.9378	10.3668	13.9412	8.9558	8.6843	9.9072	9.3129	9.5211	9.9061	9.4147	12.9833	13.4453	14.3247	14.5155	15.8153	16.0191	16.1703	12.8573	15.3328
436	7.7701	7.9823	7.7619	7.7119	7.6459	8.6456	7.6141	7.4476	8.4084	7.9291	8.0834	7.7346	7.1351	7.2441	8.2999	7.6264	7.5702	7.2889	9.5993	15.0988	10.8959	11.1217	9.5879	9.539	9.9298	9.4218	9.3768	9.3045	8.2163	7.7866	9.8371	10.2375	13.829	8.8734	8.6067	9.7834	9.2188	9.4442	9.7936	9.3422	12.8644	13.3365	14.2174	14.3899	15.7032	15.8659	16.0413	12.7166	15.2361
437	7.7003	7.9039	7.6587	7.6306	7.5632	8.5573	7.547	7.3198	8.3641	7.8388	7.9788	7.6473	7.065	7.1636	8.2119	7.5254	7.4793	7.1843	9.5045	14.9616	10.8356	11.0549	9.5026	9.4828	9.8494	9.3469	9.3542	9.2205	8.134	7.7086	9.7399	10.0955	13.7214	8.7891	8.4979	9.6799	9.1284	9.3234	9.7009	9.2504	12.7519	13.2716	14.1319	14.2895	15.589	15.7239	15.9034	12.574	15.116
438	7.6306	7.8249	7.6259	7.5618	7.5448	8.4879	7.5076	7.2433	8.287	7.7849	7.8979	7.6043	6.9882	7.0886	8.1264	7.4469	7.3875	7.1349	9.4476	14.8509	10.7925	10.9703	9.4388	9.4933	9.8457	9.3244	9.3358	9.21	8.0753	7.6345	9.703	10.0353	13.6169	8.7249	8.4362	9.6377	9.0486	9.2686	9.6457	9.19	12.6661	13.2135	14.0464	14.2259	15.5298	15.6247	15.8203	12.5093	15.0426
439	7.5467	7.7433	7.5415	7.5053	7.4788	8.4086	7.4588	7.2234	8.1919	7.7514	7.8593	7.5498	6.9205	7.0099	8.0487	7.3998	7.329	7.0567	9.3785	14.7901	10.7175	10.955	9.3759	9.4866	9.833	9.3133	9.2916	9.1831	8.0159	7.5542	9.6496	9.9869	13.5455	8.6524	8.3938	9.5906	8.9683	9.1988	9.5821	9.101	12.5416	13.1468	13.9228	14.1266	15.4531	15.5674	15.7477	12.4089	14.9774
440	7.4739	7.68	7.4644	7.4392	7.3851	8.3734	7.378	7.1668	8.1387	7.653	7.7726	7.4747	6.8576	6.9636	7.9764	7.3034	7.2438	6.9671	9.2934	14.7081	10.6494	10.9015	9.2925	9.4367	9.7699	9.2714	9.2361	9.1425	7.9284	7.4691	9.5689	9.9186	13.4468	8.5746	8.2993	9.5264	8.9034	9.1214	9.5266	9.028	12.4362	13.071	13.8492	14.0047	15.3455	15.4433	15.6552	12.2962	14.9122
441	7.4304	7.6121	7.4026	7.3761	7.3298	8.3196	7.2882	7.1067	8.0495	7.5723	7.7132	7.4049	6.7874	6.8901	7.9061	7.2219	7.1721	6.895	9.2199	14.6158	10.5891	10.8196	9.2098	9.3698	9.7022	9.193	9.1805	9.0777	7.8289	7.3748	9.492	9.8168	13.3907	8.5318	8.2174	9.4498	8.8603	9.039	9.4462	8.9988	12.3625	13.0039	13.7718	13.9085	15.2571	15.2915	15.5809	12.225	14.8204
442	7.396	7.5359	7.3577	7.3375	7.2638	8.2344	7.2128	7.0614	7.9764	7.5232	7.6664	7.3233	6.7179	6.8331	7.8153	7.1725	7.0797	6.834	9.1675	14.6037	10.5306	10.7352	9.152	9.2972	9.6394	9.1067	9.1221	9.0081	7.7756	7.31	9.4505	9.7749	13.3195	8.4942	8.1574	9.3547	8.8133	8.96	9.365	8.9399	12.3029	12.9527	13.6856	13.8292	15.1854	15.1629	15.5114	12.1387	14.6942
443	7.3016	7.4602	7.2458	7.2623	7.1716	8.1519	7.1248	6.9729	7.9091	7.4549	7.5836	7.2554	6.6495	6.7511	7.7029	7.0681	7.0336	6.7481	9.0918	14.5567	10.4347	10.6656	9.0707	9.1932	9.5499	9.0425	9.0214	8.9335	7.7086	7.2238	9.36	9.719	13.2527	8.3958	8.0764	9.2938	8.7331	8.8845	9.2981	8.8578	12.1881	12.9123	13.608	13.7479	15.1369	15.0872	15.4552	12.0415	14.6047
444	7.2191	7.4065	7.179	7.1836	7.1097	8.0696	7.0763	6.8983	7.862	7.3822	7.5033	7.2033	6.5823	6.6645	7.6323	6.9838	6.9522	6.685	9.0284	14.478	10.3579	10.6215	8.9949	9.1187	9.4809	8.9464	8.9425	8.8601	7.6457	7.1659	9.3128	9.6728	13.185	8.3289	8.0294	9.2577	8.6873	8.8281	9.2487	8.7986	12.1039	12.9143	13.5397	13.6988	15.1137	15.0252	15.3862	11.9698	14.5251
445	7.1388	7.3624	7.1208	7.1003	7.0552	8.0311	7.035	6.8441	7.8067	7.3238	7.472	7.1386	6.5146	6.5782	7.5689	6.9274	6.8842	6.6314	8.9711	14.3698	10.3026	10.5681	8.9177	9.0553	9.4272	8.8767	8.8674	8.7872	7.5981	7.1204	9.2739	9.6386	13.0924	8.2912	7.994	9.1708	8.6439	8.7788	9.2172	8.7575	12.0505	12.9087	13.4524	13.6651	15.0692	14.969	15.3164	11.9329	14.4506
446	7.0616	7.2945	7.0329	7.0165	6.9866	7.9918	6.9714	6.7951	7.7385	7.2591	7.4291	7.0917	6.4512	6.5275	7.5175	6.8882	6.8712	6.5697	8.8573	14.2063	10.1665	10.4399	8.89	9.0149	9.3939	8.8239	8.8221	8.7208	7.5662	7.0818	9.2331	9.6229	13.0541	8.2549	7.9301	9.1135	8.6147	8.7018	9.1779	8.7165	12.0258	12.8933	13.4099	13.6024	14.996	14.9425	15.2839	11.8848	14.399
447	6.9944	7.1909	6.9447	6.9289	6.9334	7.922	6.8949	6.753	7.6856	7.1933	7.3594	7.0032	6.3985	6.4989	7.4657	6.8071	6.7763	6.4885	8.7921	14.0988	10.0997	10.3864	8.8095	8.9485	9.3245	8.7575	8.7545	8.6556	7.5141	6.9947	9.1785	9.5488	13.0229	8.2142	7.8726	9.0627	8.5223	8.6417	9.1198	8.6459	11.97	12.8423	13.3298	13.5001	14.9219	14.8576	15.165	11.7851	14.3477
448	6.9688	7.1574	6.918	6.9043	6.8891	7.9003	6.8499	6.7283	7.6605	7.16	7.3537	6.9385	6.3563	6.441	7.4234	6.7468	6.7317	6.4424	8.8145	14.1222	10.1352	10.4143	8.7586	8.8902	9.2985	8.7142	8.7144	8.6215	7.447	6.9321	9.1424	9.49	12.9704	8.1675	7.83	9.0161	8.4865	8.5982	9.0675	8.5998	11.9186	12.82	13.2894	13.4176	14.8533	14.7902	15.1058	11.7271	14.33
449	6.9324	7.1337	6.8937	6.8918	6.8847	7.8757	6.8153	6.6985	7.6363	7.1293	7.3133	6.9215	6.3092	6.4024	7.3724	6.7421	6.709	6.4065	8.7504	14.1379	10.1066	10.4113	8.7496	8.8484	9.2693	8.6934	8.6882	8.6041	7.3989	6.9093	9.0895	9.4374	12.9346	8.1267	7.8032	8.996	8.4663	8.5976	9.0625	8.5517	11.8658	12.7867	13.2424	13.3722	14.8052	14.7404	15.0202	11.6992	14.2775
450	6.9077	7.1063	6.881	6.8547	6.8459	7.8235	6.7977	6.6724	7.6083	7.0869	7.2749	6.9204	6.3172	6.3836	7.3432	6.7141	6.6961	6.3854	8.7044	14.1594	10.0839	10.3861	8.7418	8.8227	9.2167	8.6722	8.6594	8.5704	7.3831	6.9211	9.0348	9.4209	12.915	8.1201	7.7721	9.0042	8.4573	8.5699	9.0644	8.5437	11.8574	12.7704	13.2128	13.3152	14.7752	14.7253	15.0215	11.6869	14.2547
451	6.9024	7.0963	6.8699	6.8573	6.8221	7.811	6.7847	6.6315	7.5731	7.0767	7.2544	6.8939	6.2907	6.362	7.3308	6.6912	6.6485	6.3779	8.6912	14.1583	10.0759	10.3614	8.7131	8.8389	9.2112	8.6944	8.6864	8.5918	7.3816	6.8956	9.0627	9.4626	12.9339	8.1209	7.7738	8.9824	8.4147	8.5235	9.0362	8.5328	11.8655	12.7974	13.215	13.2588	14.7602	14.6866	14.9601	11.6618	14.2502
452	6.9128	7.0827	6.8807	6.8721	6.8418	7.8511	6.7944	6.6512	7.6097	7.1387	7.2774	6.9013	6.2989	6.3441	7.3555	6.7265	6.6631	6.4054	8.7219	14.2218	10.0974	10.3747	8.7377	8.9148	9.3039	8.7643	8.7416	8.6589	7.3685	6.9073	9.1014	9.5049	12.9819	8.1584	7.8173	9.0049	8.459	8.5289	9.0861	8.5833	11.91	12.8599	13.2791	13.2656	14.77	14.6868	14.9707	11.6767	14.3269
453	6.891	7.0495	6.8423	6.8456	6.8172	7.834	6.7818	6.6541	7.6212	7.1379	7.2847	6.8968	6.2752	6.3173	7.3653	6.7186	6.6823	6.3923	8.7198	14.2296	10.1034	10.3949	8.7486	8.8939	9.3133	8.7621	8.7394	8.6694	7.3605	6.9313	9.1001	9.4931	13.0071	8.1535	7.8434	9.009	8.4794	8.5296	9.1241	8.6097	11.9384	12.905	13.2973	13.2546	14.7611	14.7024	14.9912	11.7408	14.3427
454	6.8529	7.017	6.7864	6.8053	6.7628	7.783	6.7436	6.5993	7.5766	7.0846	7.2463	6.8419	6.2496	6.2789	7.3048	6.6576	6.6434	6.3178	8.6604	14.1519	10.0295	10.354	8.6968	8.831	9.2626	8.7206	8.6764	8.5973	7.3259	6.881	9.0413	9.4444	12.9453	8.1207	7.788	8.9614	8.4413	8.502	9.095	8.5644	11.9075	12.9195	13.2691	13.1768	14.7148	14.6738	14.9414	11.7157	14.2647
455	6.8115	7.0039	6.7686	6.7814	6.7336	7.7247	6.7055	6.5526	7.5145	7.062	7.2263	6.8018	6.1999	6.2451	7.2579	6.6229	6.5932	6.2901	8.6161	14.1019	10.0009	10.3395	8.6792	8.8235	9.239	8.7108	8.7049	8.5683	7.3135	6.8301	9.0001	9.4436	12.8944	8.0887	7.7543	8.949	8.4305	8.4767	9.0548	8.5165	11.863	12.9342	13.2779	13.1487	14.7051	14.6251	14.9526	11.6639	14.2075
456	6.7751	6.974	6.745	6.745	6.7042	7.6851	6.6873	6.5441	7.4498	7.0129	7.2057	6.7698	6.1704	6.2147	7.2243	6.5986	6.5359	6.2461	8.5943	14.0426	9.9653	10.2899	8.647	8.7776	9.2267	8.6812	8.6662	8.5377	7.282	6.8055	8.9833	9.4171	12.8806	8.0749	7.7069	8.9257	8.3987	8.4256	9.0276	8.5279	11.8268	12.9622	13.2221	13.0898	14.6382	14.5521	14.8889	11.6163	14.1559
457	6.7448	6.9101	6.6935	6.7051	6.6689	7.6651	6.6256	6.4954	7.4202	6.9717	7.1408	6.7215	6.1299	6.1734	7.1849	6.5472	6.4686	6.1822	8.552	14.0269	9.9311	10.2611	8.6047	8.7178	9.1853	8.5878	8.5905	8.471	7.2204	6.7638	8.9689	9.3803	12.8403	8.0486	7.6523	8.893	8.3499	8.3853	9.022	8.4732	11.8148	12.9699	13.1628	13.0324	14.5723	14.4979	14.8428	11.5732	14.1394
458	6.7039	6.8671	6.6457	6.6812	6.6206	7.6165	6.5735	6.4529	7.3847	6.9163	7.1141	6.6892	6.0848	6.1319	7.1343	6.5073	6.4348	6.1463	8.5185	13.9649	9.8966	10.2379	8.584	8.6608	9.1305	8.5072	8.5208	8.3915	7.1858	6.6849	8.9467	9.3623	12.7871	8.0208	7.6422	8.8653	8.3304	8.3553	8.9867	8.4352	11.7937	12.9795	13.1303	13.0061	14.5359	14.4555	14.7755	11.5602	14.0732
459	6.6759	6.8554	6.6526	6.6835	6.6232	7.6107	6.5614	6.4367	7.385	6.9109	7.1138	6.6819	6.0656	6.1001	7.1055	6.5124	6.4488	6.1283	8.5372	13.9467	9.921	10.2417	8.5878	8.6718	9.1099	8.5156	8.5145	8.3922	7.1723	6.6707	8.9402	9.3655	12.8039	8.0407	7.6516	8.8789	8.3165	8.3451	8.9815	8.424	11.8353	12.988	13.1379	12.9954	14.5295	14.4371	14.7405	11.5613	14.0675
460	6.6538	6.8428	6.6401	6.6337	6.6166	7.6059	6.5441	6.3982	7.3492	6.8988	7.1069	6.6535	6.0291	6.055	7.0788	6.4788	6.4149	6.0868	8.5316	13.9588	9.9134	10.2345	8.566	8.6669	9.084	8.497	8.4832	8.3894	7.1594	6.666	8.9119	9.3612	12.7746	8.0288	7.6329	8.904	8.3003	8.3287	8.9827	8.4229	11.8613	12.9584	13.1224	12.9686	14.5194	14.4073	14.6735	11.5145	14.0755
461	6.6464	6.8251	6.6114	6.6209	6.5936	7.5781	6.5241	6.3754	7.3168	6.8764	7.0925	6.6427	6.0109	6.047	7.0466	6.4464	6.3815	6.0442	8.5052	13.9471	9.9052	10.2259	8.538	8.605	9.0569	8.4565	8.4465	8.358	7.1439	6.6569	8.8767	9.3629	12.7429	8.0224	7.5895	8.875	8.2954	8.3045	8.9719	8.4131	11.8361	12.938	13.1131	12.9107	14.4651	14.3523	14.6277	11.4779	14.0455
462	6.631	6.7965	6.5891	6.6038	6.5592	7.5505	6.5111	6.3614	7.293	6.8424	7.0443	6.6145	5.9894	6.0134	7.0246	6.4225	6.3763	6.0146	8.485	13.913	9.8719	10.2113	8.5395	8.5683	9.0083	8.3942	8.3948	8.3392	7.124	6.6233	8.8577	9.3498	12.7399	7.9997	7.5845	8.8497	8.2835	8.2612	8.9448	8.4213	11.806	12.9503	13.1028	12.8556	14.4412	14.309	14.6163	11.4495	14.0216
463	6.6669	6.8038	6.6215	6.614	6.5766	7.5764	6.5361	6.4011	7.3406	6.8639	7.0637	6.6488	6.0134	6.0411	7.0563	6.4489	6.3975	6.0442	8.5166	13.9241	9.8974	10.2417	8.6043	8.5985	9.0606	8.4365	8.4517	8.3666	7.1445	6.6366	8.8923	9.3699	12.77	8.0194	7.6351	8.8889	8.3008	8.2847	8.9938	8.4631	11.8169	13.0048	13.1383	12.8467	14.4552	14.3247	14.6471	11.4605	14.0666
464	6.7068	6.8591	6.6763	6.6738	6.6438	7.6269	6.5908	6.4288	7.3687	6.9283	7.1155	6.68	6.0535	6.0928	7.1062	6.4974	6.4222	6.1058	8.5636	13.9758	9.9576	10.2669	8.6769	8.6739	9.1303	8.5004	8.5078	8.4167	7.1959	6.6737	8.9316	9.4231	12.8063	8.0736	7.681	8.9337	8.3574	8.3199	9.0696	8.5149	11.8941	13.0401	13.1851	12.8771	14.4829	14.3251	14.6744	11.5168	14.1116
465	6.7023	6.87	6.6879	6.7036	6.6368	7.637	6.5971	6.4446	7.3673	6.93	7.1207	6.6855	6.0296	6.0923	7.1011	6.4793	6.4196	6.1053	8.5775	14.0145	9.9782	10.2924	8.6892	8.6783	9.1366	8.5142	8.4924	8.4175	7.1915	6.6547	8.92	9.4325	12.8038	8.076	7.6698	8.9083	8.3627	8.3096	9.0811	8.5182	11.9154	13.0461	13.1914	12.8701	14.4883	14.2905	14.6635	11.518	14.1031
466	6.6924	6.8537	6.6485	6.6839	6.6386	7.6024	6.5841	6.4488	7.3549	6.9272	7.1037	6.6608	6.0022	6.0622	7.0791	6.4518	6.4086	6.0916	8.5748	14.0058	9.9776	10.2868	8.6787	8.6551	9.1202	8.5077	8.4613	8.3935	7.1541	6.6247	8.8861	9.42	12.7711	8.077	7.6565	8.8848	8.3494	8.2784	9.0676	8.4984	11.9179	13.0658	13.1865	12.8357	14.4442	14.2638	14.6256	11.4818	14.0789
467	6.6774	6.8624	6.6427	6.6606	6.6581	7.6096	6.5758	6.4331	7.3407	6.9078	7.095	6.6454	5.9936	6.0425	7.0419	6.4272	6.3751	6.0447	8.5716	14.0508	9.9555	10.2843	8.6687	8.647	9.1208	8.5001	8.4397	8.3775	7.1294	6.6074	8.8639	9.4047	12.7476	8.0655	7.6293	8.8792	8.3249	8.2703	9.0623	8.4721	11.9008	13.0981	13.1523	12.7963	14.3969	14.2085	14.5764	11.4583	14.0708
468	6.704	6.865	6.6754	6.6824	6.6844	7.6352	6.5792	6.4338	7.34	6.9199	7.1027	6.667	5.9968	6.0435	7.0518	6.4377	6.3904	6.0254	8.5847	14.1482	9.9639	10.3193	8.6792	8.6734	9.1395	8.5086	8.4726	8.4059	7.1416	6.6312	8.8872	9.4389	12.766	8.0771	7.6247	8.8851	8.3289	8.2814	9.0669	8.488	11.934	13.1376	13.1627	12.8037	14.3923	14.1917	14.5756	11.4609	14.0964
469	6.7386	6.9023	6.6988	6.7212	6.6979	7.656	6.604	6.4531	7.3612	6.9576	7.1461	6.6974	6.0182	6.0656	7.0876	6.4647	6.421	6.0378	8.6333	14.2194	9.9977	10.3533	8.7259	8.7044	9.1575	8.5328	8.5095	8.4417	7.1768	6.6582	8.9015	9.4639	12.7751	8.1303	7.6637	8.9094	8.3665	8.3073	9.1092	8.5335	11.9704	13.1884	13.2036	12.8574	14.428	14.1997	14.5999	11.4653	14.1257
470	6.7726	6.949	6.7331	6.7508	6.7336	7.6914	6.6318	6.4782	7.3813	6.9862	7.1813	6.7149	6.0377	6.1013	7.1042	6.4822	6.4436	6.0584	8.6754	14.2828	10.0401	10.3709	8.7628	8.7147	9.1819	8.5641	8.5257	8.4673	7.2015	6.6692	8.906	9.495	12.7739	8.1656	7.7136	8.9472	8.4029	8.3274	9.1552	8.5612	11.9852	13.2422	13.2557	12.8587	14.4594	14.198	14.596	11.454	14.1749
471	6.8144	6.9761	6.7513	6.7767	6.7523	7.715	6.6347	6.4911	7.3899	6.9891	7.1845	6.7207	6.0331	6.1033	7.1144	6.478	6.4445	6.0607	8.6933	14.3131	10.0827	10.3863	8.7939	8.7372	9.2141	8.5851	8.5458	8.4935	7.2157	6.6826	8.9196	9.5145	12.7745	8.1661	7.7264	8.9648	8.3976	8.3273	9.1821	8.5953	11.9665	13.2935	13.259	12.8082	14.4809	14.1808	14.5736	11.4438	14.2159
472	6.8461	6.9948	6.7957	6.8108	6.7843	7.7084	6.6331	6.5125	7.4017	6.9881	7.1924	6.7331	6.0485	6.1017	7.1355	6.5087	6.4604	6.0754	8.7013	14.3225	10.1013	10.4062	8.8176	8.7852	9.2555	8.6117	8.5887	8.5333	7.2282	6.6975	8.9415	9.5479	12.7948	8.1949	7.7469	9.0125	8.4361	8.3572	9.2152	8.6184	11.9942	13.3456	13.2721	12.7871	14.4893	14.2008	14.5844	11.4719	14.2608
473	6.8633	6.9981	6.8098	6.8081	6.8139	7.7058	6.656	6.5185	7.4158	7.0062	7.2124	6.7476	6.0585	6.111	7.164	6.5219	6.4772	6.1054	8.719	14.3739	10.1049	10.415	8.8167	8.8386	9.3238	8.6783	8.6654	8.5869	7.2454	6.706	8.9758	9.5639	12.8041	8.2321	7.779	9.0535	8.4808	8.3899	9.2243	8.638	12.055	13.3931	13.3052	12.7987	14.5289	14.2211	14.6273	11.4887	14.2821
474	6.8617	7.009	6.7971	6.8104	6.8143	7.7013	6.6593	6.5161	7.428	7.0164	7.2293	6.7589	6.0476	6.1076	7.1533	6.5304	6.4795	6.0991	8.7273	14.3996	10.1028	10.4011	8.8207	8.8686	9.3644	8.7043	8.6937	8.6113	7.2595	6.7086	8.9853	9.5608	12.8025	8.2438	7.7999	9.0591	8.5062	8.4048	9.2614	8.6534	12.0758	13.4068	13.3251	12.829	14.549	14.2249	14.6541	11.4971	14.3064
475	6.8414	7.0067	6.8039	6.8115	6.8156	7.7043	6.6519	6.5137	7.423	7.0189	7.2386	6.7596	6.0486	6.1033	7.1446	6.5328	6.4676	6.0992	8.7106	14.3802	10.0963	10.3878	8.8392	8.8601	9.3567	8.6991	8.6935	8.6057	7.2558	6.7071	8.9835	9.5747	12.7859	8.2646	7.7921	9.0584	8.5104	8.3951	9.2868	8.6534	12.0892	13.4445	13.3212	12.8312	14.5441	14.2139	14.6512	11.4673	14.2977
476	6.8106	6.9777	6.789	6.7777	6.7905	7.6941	6.6501	6.4967	7.4011	7.007	7.2191	6.7331	6.0438	6.0875	7.1379	6.502	6.4443	6.0829	8.706	14.3677	10.0713	10.3862	8.8207	8.8465	9.3187	8.6642	8.6621	8.5753	7.2225	6.6907	8.9592	9.5956	12.7686	8.2682	7.7786	9.0552	8.4977	8.3763	9.2887	8.6571	12.0846	13.4263	13.3139	12.7915	14.5243	14.1754	14.6105	11.4152	14.2868
477	6.78	6.9565	6.7493	6.7517	6.7516	7.6804	6.6516	6.4773	7.3798	6.9969	7.1947	6.7008	6.0282	6.0764	7.1058	6.486	6.4341	6.0806	8.6942	14.3413	10.046	10.3748	8.7871	8.8125	9.2767	8.6206	8.6264	8.5203	7.1885	6.6787	8.931	9.6168	12.7567	8.2548	7.7884	9.04	8.4965	8.3649	9.2746	8.6686	12.0774	13.4218	13.324	12.7694	14.5094	14.142	14.5655	11.379	14.2617
478	6.7499	6.9178	6.7185	6.7182	6.7317	7.6535	6.6226	6.451	7.3686	6.9691	7.1785	6.6773	6.0057	6.0597	7.0802	6.4489	6.4259	6.0624	8.6543	14.3176	10.0267	10.3314	8.7573	8.7725	9.2317	8.5754	8.5684	8.4625	7.1795	6.6677	8.9302	9.5672	12.7397	8.2353	7.759	9.0313	8.5009	8.3469	9.2757	8.6684	12.072	13.4078	13.3137	12.7597	14.4852	14.0968	14.5445	11.3503	14.2552
479	6.697	6.8606	6.6714	6.6498	6.6897	7.5849	6.5773	6.4056	7.3188	6.9071	7.1508	6.6239	5.9569	6.0101	7.0236	6.4083	6.3844	6.0121	8.583	14.2518	9.9721	10.2381	8.7079	8.675	9.1273	8.4828	8.4652	8.3814	7.1548	6.6188	8.8735	9.5023	12.6557	8.192	7.6923	8.9767	8.4368	8.2967	9.236	8.6325	12.0115	13.3532	13.2266	12.7024	14.4248	14.0171	14.4756	11.2948	14.1814
480	6.6242	6.7778	6.6073	6.5813	6.6214	7.524	6.511	6.3506	7.245	6.8357	7.077	6.5459	5.8837	5.946	6.9401	6.36	6.3051	5.9311	8.5102	14.1781	9.8954	10.1545	8.6535	8.5604	8.9938	8.3684	8.3355	8.2753	7.0815	6.5378	8.792	9.4417	12.5656	8.1404	7.621	8.8995	8.3943	8.2221	9.1907	8.5735	11.9084	13.2574	13.1224	12.6215	14.3242	13.9006	14.3559	11.2035	14.0963
481	6.603	6.7462	6.5725	6.5506	6.5647	7.5017	6.4762	6.3046	7.2027	6.8062	7.0277	6.5163	5.8455	5.9087	6.9067	6.3195	6.2595	5.8955	8.4704	14.1372	9.864	10.1337	8.6171	8.4881	8.9359	8.3022	8.2889	8.2249	7.0393	6.4887	8.7455	9.4512	12.5319	8.1098	7.5971	8.8709	8.3787	8.1928	9.1431	8.5413	11.8534	13.2108	13.0754	12.5667	14.2419	13.8018	14.2787	11.1672	14.0745
482	6.5965	6.7212	6.535	6.5172	6.5243	7.4701	6.4584	6.2876	7.1845	6.7803	7.0233	6.5002	5.8206	5.884	6.8881	6.2965	6.2371	5.8692	8.4434	14.0607	9.8562	10.1124	8.5803	8.4521	8.893	8.2843	8.2666	8.1983	7.0239	6.4676	8.7327	9.4407	12.5301	8.1056	7.6	8.8679	8.3759	8.1717	9.148	8.524	11.8443	13.2174	13.0879	12.5061	14.2266	13.7706	14.2557	11.1465	14.0687
483	6.5589	6.6914	6.4825	6.4879	6.5042	7.4479	6.4394	6.2625	7.1545	6.754	6.9906	6.4899	5.8009	5.867	6.8573	6.2802	6.2144	5.8424	8.4144	13.9763	9.8304	10.0816	8.552	8.3866	8.8624	8.2609	8.2106	8.1503	7.0026	6.4379	8.7108	9.4072	12.4961	8.0947	7.5895	8.86	8.3427	8.146	9.1206	8.4813	11.8059	13.2159	13.0585	12.4644	14.2357	13.7308	14.2218	11.1231	14.0322
484	6.5048	6.6201	6.4217	6.4344	6.4595	7.4045	6.3879	6.2066	7.1135	6.7113	6.9438	6.4463	5.7629	5.8317	6.8101	6.2262	6.1705	5.8155	8.3825	13.9021	9.7788	10.0417	8.5113	8.3224	8.801	8.1955	8.1404	8.0717	6.9385	6.401	8.647	9.3847	12.4422	8.0693	7.5497	8.8109	8.2911	8.0796	9.0862	8.4167	11.7698	13.1696	12.9903	12.4056	14.2181	13.6694	14.1819	11.0883	13.967
485	6.472	6.5714	6.3873	6.3893	6.4094	7.3669	6.3494	6.1657	7.0889	6.6756	6.9131	6.3815	5.731	5.7908	6.782	6.1931	6.1476	5.773	8.3339	13.9066	9.7482	9.9791	8.4664	8.2688	8.7429	8.1255	8.0729	8.0169	6.8954	6.3751	8.6076	9.3673	12.421	8.0322	7.5054	8.759	8.257	8.05	9.0682	8.3987	11.7456	13.1087	12.9677	12.3768	14.1884	13.6295	14.17	11.0421	13.9421
486	6.4485	6.5526	6.3784	6.3787	6.3932	7.3349	6.3409	6.1626	7.071	6.6557	6.9139	6.3754	5.7204	5.7885	6.7742	6.1856	6.1337	5.7518	8.2922	13.9152	9.7107	9.9621	8.4486	8.2389	8.7063	8.0927	8.0463	7.9604	6.8836	6.3423	8.598	9.3492	12.4234	8.0084	7.4845	8.7511	8.2651	8.054	9.0726	8.4116	11.757	13.0903	12.9547	12.3635	14.1767	13.606	14.1674	11.0445	13.9076
487	6.4347	6.5612	6.3982	6.4103	6.4215	7.3455	6.3717	6.1857	7.0711	6.6812	6.9517	6.4082	5.7548	5.7977	6.8022	6.1872	6.1575	5.7749	8.319	13.9067	9.7226	9.9794	8.4725	8.2456	8.7127	8.0993	8.0567	7.9754	6.9125	6.3582	8.618	9.3667	12.4353	8.0482	7.5031	8.7806	8.2954	8.0786	9.1164	8.4496	11.7645	13.0966	12.9915	12.3672	14.1681	13.6065	14.1581	11.0774	13.9026
488	6.425	6.5518	6.4102	6.4013	6.4289	7.3419	6.3658	6.1724	7.0534	6.659	6.9335	6.4028	5.7383	5.7862	6.8061	6.1847	6.1584	5.7625	8.3119	13.8975	9.7076	9.9549	8.4533	8.2344	8.6946	8.0909	8.0582	7.9972	6.9171	6.3484	8.6094	9.3661	12.4359	8.0596	7.5165	8.7957	8.3117	8.0837	9.1137	8.4577	11.7388	13.0669	12.9947	12.333	14.1662	13.5985	14.1326	11.0667	13.9077
489	6.4238	6.5531	6.3756	6.365	6.4049	7.3293	6.3442	6.1391	7.0467	6.6309	6.9126	6.384	5.7207	5.7913	6.7787	6.1837	6.1475	5.7303	8.2808	13.8837	9.695	9.9506	8.4363	8.2084	8.6579	8.062	8.0336	7.9765	6.8861	6.3526	8.5779	9.3427	12.4032	8.0584	7.5093	8.7776	8.2973	8.0571	9.118	8.4367	11.7064	12.9978	12.9634	12.28	14.1296	13.5746	14.0708	11.0173	13.904
490	6.3819	6.5262	6.3311	6.3181	6.3739	7.3112	6.2894	6.1159	7.0237	6.597	6.8749	6.3602	5.6988	5.7614	6.7419	6.162	6.1086	5.7039	8.2361	13.8284	9.6487	9.9196	8.398	8.1303	8.5968	7.9712	7.969	7.9153	6.8306	6.3127	8.516	9.3003	12.3443	8.0206	7.4729	8.732	8.2568	8.0081	9.0791	8.4136	11.6729	12.9171	12.893	12.2269	14.0694	13.5157	14.0088	10.9485	13.8548
491	6.3412	6.5002	6.298	6.301	6.3682	7.2626	6.2641	6.1046	6.9777	6.5763	6.8516	6.3243	5.6616	5.7356	6.7124	6.1275	6.0865	5.6872	8.2272	13.7491	9.6021	9.8639	8.364	8.0687	8.5404	7.9058	7.8929	7.8343	6.7968	6.2678	8.4562	9.2538	12.2754	8.0142	7.4329	8.7046	8.2061	7.9794	9.0329	8.4038	11.6091	12.8372	12.8302	12.1351	14.0058	13.4157	13.9369	10.9042	13.7936
492	6.3296	6.4898	6.2932	6.3127	6.3725	7.2504	6.2653	6.1129	6.9522	6.577	6.8346	6.3061	5.6393	5.7258	6.7067	6.1207	6.068	5.6665	8.242	13.6996	9.5879	9.8395	8.3647	8.0357	8.4844	7.8877	7.8488	7.7849	6.794	6.2556	8.4467	9.2464	12.2311	8.0143	7.3999	8.6971	8.1715	7.9778	8.997	8.3813	11.5892	12.7983	12.7723	12.0552	13.9613	13.3476	13.8906	10.8815	13.7561
493	6.342	6.482	6.2951	6.308	6.3503	7.2467	6.2743	6.1127	6.9507	6.5604	6.8235	6.2915	5.6448	5.7158	6.708	6.1176	6.0623	5.6736	8.2353	13.6515	9.5823	9.8384	8.3685	7.9883	8.4418	7.8609	7.8305	7.7471	6.7733	6.243	8.4344	9.2312	12.2155	8.0208	7.4189	8.6878	8.1638	7.9723	8.9955	8.3576	11.5697	12.7479	12.7462	12.0309	13.9517	13.3362	13.8569	10.8904	13.7423
494	6.3007	6.4331	6.2767	6.2637	6.308	7.2107	6.2402	6.0854	6.9052	6.5311	6.7862	6.2527	5.6293	5.6886	6.6874	6.0764	6.0603	5.6563	8.1879	13.6023	9.5433	9.8025	8.3318	7.9288	8.3906	7.7742	7.7577	7.6949	6.7365	6.2225	8.4045	9.2002	12.1823	8.0227	7.4174	8.675	8.1456	7.9502	9.0022	8.3682	11.5598	12.7153	12.7479	12.0035	13.949	13.3169	13.7947	10.8624	13.7191
495	6.2753	6.4027	6.2441	6.2409	6.2798	7.1865	6.2206	6.0684	6.8822	6.5059	6.7815	6.2428	5.6256	5.6723	6.6665	6.0563	6.0447	5.6431	8.1735	13.5668	9.5008	9.7412	8.2811	7.8828	8.3493	7.7236	7.7008	7.6557	6.7285	6.2066	8.4017	9.1799	12.1674	8.0205	7.4171	8.6671	8.1417	7.9365	9.0003	8.3835	11.5517	12.7084	12.7632	12.0058	13.9417	13.3145	13.7644	10.8324	13.6996
496	6.2426	6.3906	6.2196	6.2331	6.282	7.1687	6.1982	6.0455	6.8665	6.4835	6.7472	6.227	5.6044	5.6476	6.6327	6.0364	6.0182	5.6251	8.1593	13.5318	9.488	9.7278	8.269	7.8443	8.3177	7.7056	7.6796	7.6296	6.7188	6.2075	8.3603	9.1229	12.1269	8.0221	7.3909	8.6506	8.1227	7.9207	8.9925	8.3582	11.5022	12.6888	12.7544	11.9924	13.8844	13.2898	13.7284	10.7919	13.632
497	6.217	6.3606	6.2017	6.2219	6.2659	7.143	6.1638	6.015	6.8485	6.4549	6.7292	6.2146	5.5818	5.6277	6.6058	5.9995	6.0037	5.5944	8.117	13.4866	9.4773	9.7077	8.2301	7.8172	8.2886	7.6677	7.6475	7.6039	6.6701	6.1909	8.3151	9.0766	12.061	7.996	7.3369	8.6004	8.1061	7.8849	8.9586	8.3254	11.4114	12.6098	12.6935	11.9186	13.8311	13.2167	13.6533	10.7406	13.5332
498	6.1522	6.2809	6.127	6.1427	6.1924	7.0927	6.1088	5.9649	6.805	6.4118	6.6969	6.1572	5.5239	5.5764	6.5624	5.9387	5.9419	5.536	8.074	13.427	9.4351	9.6473	8.1521	7.7233	8.201	7.5581	7.5579	7.5033	6.6009	6.1343	8.2472	9.009	11.982	7.9403	7.289	8.5378	8.0442	7.8092	8.9074	8.2638	11.2837	12.4498	12.609	11.8431	13.7578	13.1074	13.5491	10.6397	13.4509
499	6.0932	6.197	6.0591	6.0715	6.131	7.0164	6.0741	5.9177	6.7402	6.3483	6.6312	6.0889	5.4633	5.5159	6.4924	5.874	5.8641	5.4829	8.0024	13.3669	9.3626	9.5722	8.0869	7.5745	8.0793	7.4401	7.4201	7.3717	6.5513	6.0624	8.1896	8.921	11.9003	7.8643	7.2514	8.4871	7.9859	7.7291	8.8675	8.2028	11.2059	12.3256	12.5246	11.7835	13.6467	13.04	13.4548	10.5455	13.3853
500	6.0648	6.1748	6.0124	6.0263	6.0995	6.9768	6.0583	5.8681	6.7083	6.2955	6.594	6.0514	5.4278	5.4825	6.4534	5.8286	5.8291	5.449	7.9837	13.3207	9.305	9.5469	8.0519	7.5023	8.0045	7.3766	7.3351	7.2972	6.5178	6.0244	8.1543	8.8764	11.8443	7.8242	7.2187	8.4522	7.9509	7.7015	8.8557	8.1703	11.2023	12.2609	12.5053	11.7503	13.6133	12.9872	13.4146	10.4871	13.329
501	6.0771	6.1988	6.024	6.0413	6.0757	6.9702	6.0464	5.8623	6.7061	6.2793	6.5706	6.0384	5.4329	5.4744	6.439	5.8222	5.8177	5.45	7.996	13.3177	9.291	9.546	8.0814	7.5024	7.9675	7.3392	7.3026	7.2938	6.5233	6.0207	8.1336	8.8567	11.8061	7.8145	7.2095	8.4245	7.9349	7.6854	8.8556	8.1834	11.1898	12.2338	12.4972	11.6918	13.5734	12.9411	13.3837	10.4622	13.2837
502	6.07	6.1883	6.0199	6.0363	6.0434	6.9377	6.0142	5.8473	6.6713	6.2481	6.5598	6.023	5.4071	5.4526	6.4077	5.8139	5.7979	5.4278	7.9823	13.3002	9.2822	9.5558	8.0788	7.4881	7.9131	7.3254	7.2929	7.2732	6.4904	5.9992	8.0817	8.834	11.762	7.8098	7.1906	8.4008	7.9291	7.6663	8.8183	8.1825	11.1346	12.2022	12.4673	11.6432	13.5243	12.9159	13.3465	10.4363	13.2603
503	5.9927	6.1381	5.9547	5.9763	6.0029	6.8842	5.9615	5.8125	6.5942	6.2009	6.52	5.9714	5.3481	5.4025	6.3429	5.7501	5.7414	5.3798	7.9113	13.2317	9.2294	9.4842	8.0386	7.4211	7.8295	7.2522	7.2154	7.178	6.4255	5.9533	8.0173	8.7685	11.7141	7.7672	7.1399	8.3561	7.8657	7.5924	8.7723	8.1298	11.0788	12.1059	12.3839	11.5717	13.4587	12.8515	13.2641	10.3807	13.2283
504	5.938	6.0808	5.9162	5.9292	5.977	6.8432	5.9214	5.7614	6.556	6.1589	6.4843	5.9159	5.3031	5.3623	6.2971	5.6884	5.6968	5.336	7.8504	13.1505	9.1726	9.4019	7.98	7.3262	7.7377	7.1462	7.0963	7.0635	6.3651	5.8935	7.9656	8.7164	11.6396	7.7096	7.1074	8.2858	7.8009	7.5399	8.736	8.085	11.0227	12.0061	12.3232	11.5293	13.3639	12.775	13.1945	10.3105	13.1589
505	5.9214	6.0521	5.8794	5.9079	5.9512	6.8137	5.8895	5.7274	6.539	6.1423	6.446	5.8837	5.2735	5.3243	6.2747	5.6743	5.6535	5.2973	7.8139	13.0755	9.1408	9.37	7.9333	7.2414	7.6782	7.0856	7.0198	7.0019	6.3177	5.8615	7.9181	8.6779	11.5753	7.6918	7.0664	8.2599	7.7711	7.5118	8.7098	8.0528	10.9917	11.9245	12.2837	11.4946	13.3143	12.7319	13.1413	10.2532	13.0912
506	5.929	6.0469	5.8847	5.8841	5.9453	6.7933	5.8832	5.7096	6.5228	6.1293	6.4283	5.8964	5.2673	5.3208	6.2741	5.6722	5.6482	5.2843	7.8073	13.0521	9.1333	9.3482	7.9053	7.2392	7.6616	7.0656	7.0306	6.9982	6.3053	5.8532	7.8992	8.6507	11.5878	7.7212	7.0599	8.2822	7.7763	7.5298	8.709	8.0607	11.0047	11.9109	12.3203	11.4631	13.311	12.7355	13.1458	10.2606	13.0834
507	5.9226	6.0432	5.8808	5.8632	5.915	6.7642	5.8572	5.6932	6.4977	6.1045	6.4172	5.8686	5.2486	5.3023	6.2567	5.6493	5.6292	5.2686	7.8027	12.9925	9.116	9.3141	7.9019	7.2332	7.6527	7.0518	7.011	7.0096	6.3128	5.8487	7.8943	8.6359	11.6021	7.716	7.0651	8.2977	7.7653	7.5256	8.7319	8.0799	10.9926	11.9007	12.3315	11.4358	13.3197	12.7288	13.1208	10.244	13.0798
508	5.9146	6.0217	5.8524	5.8453	5.9074	6.7547	5.8533	5.6841	6.4857	6.1018	6.3948	5.8593	5.232	5.286	6.2086	5.6336	5.6139	5.2654	7.7699	12.9464	9.1086	9.3164	7.8903	7.1941	7.6286	7.0261	6.9948	6.9908	6.2971	5.8119	7.885	8.6153	11.5818	7.7283	7.0635	8.2961	7.7595	7.4931	8.7437	8.0938	10.9729	11.8635	12.3143	11.4042	13.2906	12.7142	13.0925	10.2164	13.0719
509	5.8997	6.0124	5.8511	5.8306	5.8828	6.7385	5.8387	5.672	6.4793	6.0954	6.3854	5.8521	5.222	5.282	6.179	5.6113	5.5821	5.2434	7.7402	12.8988	9.0844	9.3265	7.8642	7.1614	7.5896	6.9801	6.9487	6.9158	6.2708	5.7967	7.8604	8.5732	11.5395	7.7215	7.0385	8.2822	7.7552	7.4668	8.7398	8.0716	10.919	11.8328	12.2995	11.373	13.2593	12.6776	13.0702	10.1874	13.0107
510	5.8794	5.9955	5.8287	5.8165	5.8696	6.7182	5.8238	5.6738	6.4646	6.0784	6.3828	5.8228	5.2021	5.2645	6.164	5.5856	5.5637	5.2175	7.7352	12.8639	9.0776	9.3186	7.8568	7.1022	7.5411	6.9252	6.9135	6.8521	6.2429	5.7741	7.8243	8.537	11.4659	7.7066	7.0106	8.2358	7.7177	7.4202	8.7271	8.0515	10.8652	11.7766	12.2439	11.3401	13.1997	12.618	13.0212	10.1477	12.9356
511	5.8729	5.9849	5.8211	5.8175	5.8776	6.7116	5.8149	5.6596	6.457	6.0584	6.3565	5.8041	5.1803	5.2438	6.1703	5.5854	5.5608	5.2134	7.7377	12.8531	9.0661	9.3103	7.8607	7.0768	7.504	6.8932	6.8923	6.8267	6.2449	5.7435	7.7918	8.5174	11.3923	7.6941	6.9965	8.2035	7.7131	7.4119	8.7116	8.0606	10.8367	11.7368	12.2266	11.3104	13.1704	12.605	12.9979	10.1377	12.9264
512	5.8591	5.9607	5.8024	5.8016	5.8627	6.7022	5.7988	5.6512	6.442	6.0536	6.3464	5.791	5.1885	5.231	6.1586	5.583	5.561	5.217	7.7425	12.8375	9.0575	9.3092	7.8571	7.0703	7.4826	6.8688	6.8818	6.803	6.2285	5.7376	7.78	8.5007	11.3889	7.6799	6.9982	8.2049	7.7151	7.4075	8.7258	8.0745	10.8608	11.72	12.2455	11.3067	13.1793	12.6222	13.0092	10.1395	12.945
513	5.8092	5.9191	5.7631	5.7654	5.8298	6.6788	5.7861	5.6317	6.4333	6.0426	6.316	5.7709	5.1618	5.2232	6.1559	5.564	5.5611	5.21	7.7451	12.7526	9.0433	9.2747	7.8379	7.0278	7.4445	6.825	6.8146	6.7594	6.2106	5.7446	7.7708	8.4919	11.4143	7.685	7.0065	8.2142	7.7282	7.4056	8.7423	8.0859	10.8933	11.7222	12.2623	11.2672	13.1654	12.6179	13.0095	10.1184	12.9394
514	5.7656	5.88	5.7218	5.7252	5.7875	6.6263	5.7595	5.6035	6.3899	5.9898	6.2796	5.7374	5.1555	5.2008	6.1253	5.5153	5.5199	5.1874	7.7043	12.6639	9.0015	9.2484	7.7779	6.9423	7.3746	6.7415	6.7102	6.6772	6.1809	5.7087	7.7454	8.4434	11.3762	7.6652	6.9898	8.2047	7.7072	7.3801	8.74	8.0629	10.849	11.7157	12.22	11.2313	13.0993	12.5676	12.9453	10.0412	12.8902
515	5.7495	5.8611	5.6985	5.716	5.7564	6.5909	5.7376	5.57	6.358	5.9366	6.2585	5.7178	5.111	5.1651	6.092	5.4774	5.4667	5.1488	7.6811	12.6113	8.9797	9.2273	7.7525	6.8817	7.3056	6.6734	6.6526	6.6101	6.1227	5.6589	7.6997	8.393	11.3489	7.6209	6.9583	8.1748	7.6724	7.3436	8.7139	8.0578	10.8135	11.674	12.1916	11.1734	13.0386	12.4897	12.8943	9.9744	12.8603
516	5.7714	5.9229	5.7355	5.7512	5.787	6.6193	5.7607	5.6028	6.3928	5.9755	6.302	5.741	5.1359	5.1843	6.1178	5.5145	5.5039	5.1704	7.7137	12.6389	9.0007	9.2645	7.7755	6.8933	7.3157	6.7087	6.6754	6.6345	6.146	5.6715	7.7098	8.3992	11.3643	7.6305	6.9802	8.2146	7.7085	7.3506	8.7438	8.1145	10.8469	11.6794	12.238	11.1886	13.0583	12.4847	12.9136	9.9947	12.8892
517	5.8123	5.9417	5.7699	5.7754	5.8024	6.6577	5.7768	5.6341	6.4154	6.0181	6.3406	5.7713	5.1584	5.2307	6.1495	5.5575	5.5466	5.1993	7.7363	12.6608	9.039	9.2965	7.8033	6.9356	7.3241	6.7348	6.7136	6.6536	6.1639	5.7111	7.7413	8.4148	11.3867	7.6931	7.0066	8.2549	7.7553	7.384	8.8101	8.1754	10.8934	11.6902	12.2957	11.2347	13.0782	12.5107	12.9359	10.0115	12.9006
518	5.8413	5.9384	5.7702	5.782	5.8195	6.6622	5.7867	5.645	6.4275	6.0318	6.346	5.7846	5.1712	5.2494	6.1742	5.5732	5.5574	5.2061	7.7341	12.6788	9.0428	9.2851	7.817	6.9355	7.3052	6.7228	6.7034	6.6331	6.1777	5.7432	7.734	8.4155	11.4229	7.7371	7.0303	8.2576	7.78	7.4077	8.8615	8.1991	10.8997	11.6911	12.3157	11.2518	13.0977	12.5126	12.9362	10.0198	12.9226
519	5.8007	5.902	5.7246	5.767	5.8115	6.6393	5.7683	5.6094	6.4081	5.9856	6.302	5.7499	5.1462	5.2222	6.1527	5.5282	5.5271	5.1816	7.6808	12.5995	9.0014	9.2484	7.7858	6.8752	7.2465	6.6775	6.6394	6.5818	6.1446	5.7057	7.6952	8.37	11.4033	7.7218	7.006	8.2297	7.7524	7.3713	8.845	8.185	10.8738	11.6554	12.3133	11.212	13.0557	12.4582	12.8927	9.9866	12.8908
520	5.7438	5.8521	5.6768	5.7211	5.7646	6.5756	5.7282	5.5601	6.3746	5.931	6.2447	5.6903	5.1031	5.1789	6.098	5.4734	5.4824	5.149	7.6206	12.5051	8.94	9.1925	7.7366	6.8249	7.2096	6.6364	6.5996	6.5346	6.0876	5.6552	7.6448	8.3185	11.3471	7.6941	6.9713	8.211	7.7162	7.3167	8.8117	8.1519	10.8201	11.6166	12.2776	11.1476	12.9572	12.3718	12.8114	9.9291	12.8257
521	5.7259	5.8484	5.6754	5.7001	5.7387	6.5612	5.7076	5.5507	6.3674	5.921	6.2254	5.6903	5.0756	5.1655	6.0811	5.4568	5.4625	5.1355	7.6111	12.4946	8.9295	9.1618	7.7066	6.8007	7.2135	6.6288	6.5849	6.5377	6.0844	5.6381	7.6361	8.301	11.3436	7.7004	6.9658	8.2139	7.7072	7.3122	8.8346	8.1663	10.801	11.6499	12.2571	11.1409	12.9259	12.3439	12.7701	9.9142	12.8239
522	5.7405	5.8603	5.6936	5.6988	5.7396	6.5859	5.7088	5.5684	6.3757	5.9353	6.2462	5.7068	5.0869	5.1524	6.0818	5.4681	5.4863	5.15	7.6309	12.5289	8.9475	9.173	7.7021	6.7771	7.1876	6.5958	6.5655	6.5302	6.0785	5.6513	7.6618	8.3012	11.3752	7.7265	6.9869	8.2264	7.7535	7.338	8.9037	8.2284	10.8209	11.7019	12.2912	11.1343	12.9227	12.3505	12.785	9.907	12.8472
523	5.7609	5.8497	5.7083	5.7229	5.7536	6.6068	5.7248	5.6019	6.3931	5.9524	6.2592	5.7218	5.1161	5.1599	6.0842	5.4966	5.5035	5.1594	7.6383	12.5817	8.9728	9.1721	7.7345	6.7422	7.1557	6.5625	6.5324	6.4972	6.0817	5.6604	7.6847	8.3112	11.4153	7.7401	7.0099	8.2238	7.7926	7.3594	8.9606	8.2678	10.8585	11.7324	12.3209	11.1224	12.9073	12.3478	12.7825	9.9045	12.8464
524	5.7481	5.842	5.6978	5.7161	5.7296	6.5602	5.7294	5.5892	6.3877	5.9313	6.2472	5.705	5.1174	5.147	6.0723	5.5048	5.4817	5.1578	7.6215	12.6085	8.9629	9.159	7.7237	6.6895	7.1077	6.5297	6.4761	6.4468	6.0761	5.6485	7.6516	8.3	11.3983	7.7235	7.0125	8.2142	7.7846	7.3348	8.9816	8.2869	10.8333	11.7541	12.3302	11.0857	12.8567	12.2826	12.7495	9.8542	12.8122
525	5.708	5.8244	5.6742	5.6975	5.7124	6.5381	5.7186	5.5616	6.3758	5.9111	6.2309	5.6812	5.1005	5.147	6.0424	5.4749	5.4573	5.1401	7.6036	12.5807	8.9375	9.1316	7.7028	6.6376	7.0666	6.4853	6.4177	6.4093	6.074	5.6364	7.6232	8.2614	11.3712	7.7188	6.9995	8.2209	7.7758	7.3086	8.9819	8.3155	10.8223	11.742	12.321	11.0728	12.8271	12.2152	12.7274	9.8308	12.7696
526	5.6734	5.8015	5.649	5.664	5.6925	6.5305	5.7024	5.539	6.3521	5.8946	6.2004	5.6611	5.0724	5.1369	6.0171	5.4478	5.4468	5.1076	7.5888	12.5064	8.9108	9.1003	7.6649	6.5901	7.0102	6.4449	6.3658	6.3547	6.0366	5.6124	7.5943	8.2279	11.3425	7.7247	6.9829	8.2151	7.7592	7.2894	8.988	8.3282	10.8172	11.7551	12.2986	11.0545	12.7811	12.1784	12.667	9.7945	12.7745
527	5.7184	5.831	5.679	5.6923	5.7443	6.5896	5.7425	5.5819	6.3934	5.9583	6.2428	5.6959	5.113	5.1782	6.0641	5.48	5.4876	5.1427	7.6441	12.5169	8.9507	9.1466	7.7056	6.625	7.0514	6.4776	6.4242	6.3834	6.0845	5.64	7.6413	8.2541	11.3821	7.7833	7.0303	8.2568	7.8194	7.3444	9.054	8.3925	10.8493	11.8475	12.3412	11.0789	12.8041	12.2039	12.6844	9.8154	12.8485
528	5.7568	5.8929	5.7096	5.7299	5.7839	6.6495	5.7999	5.6241	6.453	6.008	6.3119	5.7335	5.1463	5.2302	6.1244	5.5326	5.5304	5.2039	7.6997	12.5435	9.0076	9.2343	7.7608	6.6845	7.1074	6.5079	6.464	6.4204	6.1519	5.6905	7.6929	8.301	11.444	7.8442	7.1006	8.3171	7.8793	7.3991	9.1356	8.4706	10.9012	11.9386	12.4002	11.1079	12.8623	12.2017	12.735	9.8505	12.8823
529	5.7499	5.8934	5.732	5.7412	5.7809	6.6467	5.8054	5.6221	6.4651	6.0232	6.3368	5.7536	5.1433	5.2443	6.1396	5.5623	5.5636	5.2171	7.7231	12.5108	8.992	9.2247	7.7608	6.6546	7.0978	6.499	6.4439	6.4163	6.1524	5.6882	7.7115	8.3133	11.469	7.872	7.125	8.3373	7.9163	7.3972	9.1837	8.5286	10.9249	11.983	12.4359	11.1167	12.8339	12.181	12.7259	9.8697	12.8755
530	5.744	5.8721	5.7288	5.7339	5.7836	6.6364	5.8124	5.6369	6.4483	6.0108	6.3401	5.7543	5.1472	5.251	6.1319	5.554	5.5568	5.209	7.7318	12.4699	8.9844	9.2136	7.7452	6.6038	7.0486	6.4468	6.385	6.3896	6.1192	5.6943	7.6987	8.2916	11.4773	7.9064	7.1314	8.3497	7.9389	7.3978	9.2303	8.5714	10.9279	11.9941	12.4583	11.0778	12.8255	12.1726	12.7133	9.8559	12.8826
531	5.7578	5.8884	5.7289	5.7534	5.792	6.6448	5.8292	5.6527	6.4533	6.0222	6.3214	5.7494	5.1621	5.2523	6.1403	5.5498	5.5535	5.2068	7.7378	12.4461	9.0074	9.2195	7.7511	6.5698	7.0033	6.4015	6.3422	6.3276	6.1066	5.6919	7.6796	8.2923	11.4774	7.9493	7.1301	8.355	7.9666	7.4217	9.2872	8.6223	10.9479	12.0201	12.4796	11.0732	12.807	12.1318	12.6869	9.8511	12.8756
532	5.8124	5.9124	5.7709	5.7804	5.8431	6.7034	5.8675	5.6876	6.495	6.0543	6.3277	5.8051	5.2132	5.2876	6.1752	5.598	5.6067	5.259	7.7828	12.4667	9.0377	9.26	7.7829	6.5928	7.004	6.4129	6.3599	6.333	6.1462	5.6986	7.7126	8.3261	11.5287	7.9844	7.1799	8.3931	8.0205	7.4759	9.3659	8.7123	11.0012	12.112	12.5201	11.0917	12.7869	12.1385	12.6888	9.8769	12.9076
533	5.8494	5.9413	5.815	5.8281	5.8809	6.7313	5.8947	5.7339	6.5412	6.0988	6.3461	5.8569	5.2519	5.3352	6.2086	5.6496	5.6478	5.3251	7.8257	12.4829	9.0692	9.3007	7.8328	6.6675	7.0516	6.4585	6.4021	6.3853	6.2034	5.7421	7.7468	8.3654	11.5689	8.0411	7.2429	8.4359	8.0784	7.5175	9.4599	8.8171	11.0821	12.2271	12.5844	11.0795	12.7969	12.1463	12.6909	9.9037	12.9539
534	5.8649	5.9615	5.84	5.8435	5.8935	6.7529	5.8919	5.7679	6.5595	6.1262	6.3833	5.8743	5.2695	5.3592	6.2309	5.6686	5.6764	5.3568	7.8438	12.4725	9.0763	9.3187	7.8727	6.687	7.0835	6.5058	6.4343	6.4254	6.2205	5.792	7.7723	8.3931	11.6194	8.0957	7.2825	8.4993	8.1362	7.5426	9.5233	8.9004	11.1467	12.292	12.6263	11.0781	12.8401	12.1616	12.6678	9.8881	12.9788
535	5.8675	5.9629	5.8229	5.8441	5.8825	6.7721	5.9118	5.7642	6.5641	6.1372	6.4102	5.8445	5.2649	5.3828	6.2279	5.6734	5.7016	5.3398	7.8407	12.4363	9.0471	9.3155	7.8511	6.6582	7.0442	6.4836	6.4238	6.3955	6.1974	5.7791	7.7743	8.3868	11.631	8.147	7.2973	8.5239	8.1564	7.5896	9.5638	8.9573	11.1876	12.3099	12.6583	11.0939	12.8233	12.1805	12.6564	9.8537	12.9764
536	5.8468	5.9543	5.8052	5.8205	5.88	6.7557	5.8933	5.7701	6.5593	6.1207	6.3983	5.8139	5.2535	5.3674	6.2374	5.6764	5.688	5.3313	7.828	12.3977	9.0368	9.296	7.8325	6.5994	6.9917	6.4028	6.3754	6.3313	6.1808	5.754	7.7591	8.3714	11.6085	8.1636	7.3094	8.5276	8.1526	7.6078	9.6058	8.9955	11.1925	12.3198	12.6684	11.0784	12.815	12.1511	12.6189	9.8347	12.968
537	5.844	5.9675	5.8014	5.8253	5.8974	6.7476	5.8974	5.7834	6.573	6.0988	6.3975	5.8151	5.2477	5.3666	6.236	5.6854	5.6985	5.371	7.8462	12.3891	9.0534	9.3008	7.851	6.5703	6.9659	6.3723	6.3498	6.3114	6.1564	5.7433	7.7595	8.3669	11.5968	8.1626	7.3218	8.5388	8.1645	7.6152	9.6502	9.0301	11.1965	12.3576	12.682	11.0558	12.8	12.1317	12.5931	9.8147	12.9593
538	5.8899	6.0287	5.8498	5.8836	5.9508	6.8012	5.9229	5.8148	6.6102	6.1404	6.4451	5.8775	5.287	5.4002	6.2893	5.7161	5.7377	5.4071	7.89	12.3855	9.0969	9.3422	7.8897	6.6056	7.0199	6.403	6.3761	6.346	6.1958	5.7665	7.7957	8.4303	11.6358	8.2212	7.3632	8.5582	8.2177	7.6426	9.7225	9.1078	11.2052	12.4164	12.726	11.0568	12.8088	12.1236	12.5853	9.8278	12.9729
539	5.9222	6.0592	5.8787	5.9151	5.9846	6.8459	5.9478	5.8473	6.6382	6.1767	6.454	5.908	5.3152	5.4148	6.3231	5.7361	5.7714	5.417	7.9426	12.3998	9.1274	9.3639	7.9173	6.6242	7.0609	6.4377	6.3915	6.3753	6.2128	5.7781	7.8053	8.4407	11.6819	8.2939	7.3778	8.5818	8.2542	7.6634	9.8388	9.1851	11.2221	12.4441	12.7647	11.0846	12.8236	12.0944	12.6041	9.8529	13.0137
540	5.9222	6.0636	5.8853	5.9023	5.9608	6.8426	5.9799	5.8403	6.6675	6.2022	6.469	5.9017	5.3152	5.4228	6.3371	5.7645	5.773	5.4488	7.9755	12.4358	9.1393	9.3795	7.9362	6.6037	7.0403	6.4183	6.3782	6.3534	6.2312	5.7919	7.8165	8.4232	11.6837	8.3356	7.4081	8.6004	8.3001	7.6925	9.9187	9.2391	11.2757	12.4672	12.792	11.0999	12.812	12.0708	12.6023	9.8495	13.0469
541	5.9218	6.0789	5.9206	5.9137	5.9487	6.8535	6.0038	5.8371	6.6781	6.2129	6.4751	5.898	5.3222	5.4338	6.3324	5.7821	5.7788	5.4597	7.9864	12.4496	9.1544	9.3895	7.959	6.551	7.0307	6.4013	6.3494	6.3208	6.2281	5.7999	7.8204	8.4235	11.6875	8.3448	7.4246	8.6345	8.3347	7.7027	9.9878	9.2951	11.2912	12.5162	12.8413	11.0867	12.7778	12.0681	12.5667	9.822	13.0944
542	5.9551	6.0952	5.9545	5.9734	5.9807	6.8664	6.0229	5.8858	6.7145	6.2168	6.4991	5.9372	5.3641	5.4688	6.3589	5.8083	5.8135	5.4784	8.0205	12.4478	9.1901	9.4292	7.9984	6.5463	7.0485	6.4093	6.3413	6.3041	6.2594	5.8191	7.8569	8.4359	11.6936	8.37	7.4546	8.6624	8.3722	7.7542	10.0816	9.381	11.3248	12.5665	12.8924	11.058	12.8026	12.0463	12.5671	9.8173	13.1348
543	6.0045	6.1189	5.9783	5.9936	6.0359	6.9032	6.0472	5.9268	6.7536	6.2569	6.5409	5.9838	5.386	5.5172	6.3991	5.8508	5.8561	5.5196	8.0608	12.4493	9.2134	9.4647	8.0317	6.5626	7.0395	6.4012	6.3388	6.3137	6.2766	5.8453	7.8735	8.4572	11.7194	8.4404	7.5103	8.7028	8.4198	7.7869	10.1673	9.4646	11.3885	12.6375	12.9401	11.0828	12.8282	12.0493	12.588	9.8217	13.1634
544	6.0568	6.1586	6.0158	6.0047	6.0731	6.9524	6.0986	5.9695	6.8034	6.2914	6.5896	6.0317	5.4351	5.5556	6.4533	5.8868	5.9161	5.5833	8.1205	12.4881	9.2525	9.4902	8.0751	6.5841	7.0343	6.4278	6.3755	6.3415	6.3232	5.8969	7.8993	8.4999	11.7765	8.5302	7.5807	8.7615	8.4923	7.838	10.2681	9.5783	11.4705	12.7703	13.021	11.1547	12.8562	12.0735	12.6211	9.8411	13.2172
545	6.0914	6.1803	6.0539	6.0471	6.1043	6.9991	6.1503	6.0066	6.8519	6.3385	6.6405	6.0662	5.4604	5.6003	6.4957	5.9262	5.9794	5.641	8.1804	12.5428	9.2885	9.5236	8.1124	6.6175	7.0668	6.4569	6.4301	6.3839	6.3727	5.9212	7.9454	8.5655	11.8456	8.6016	7.65	8.8392	8.5814	7.9184	10.3784	9.6894	11.5504	12.9218	13.1147	11.1864	12.8867	12.0953	12.6709	9.8719	13.2723
546	6.0888	6.1956	6.0762	6.0699	6.1166	7.0183	6.1875	6.0337	6.8858	6.3699	6.6602	6.0831	5.482	5.6155	6.5068	5.9529	6.0123	5.6683	8.198	12.5672	9.3138	9.5339	8.142	6.6308	7.0699	6.4484	6.4181	6.4035	6.3751	5.9304	7.9765	8.6112	11.8854	8.6343	7.6971	8.9055	8.615	7.9624	10.4489	9.7676	11.6044	12.9931	13.1528	11.2013	12.9168	12.1116	12.695	9.8951	13.2908
547	6.117	6.2124	6.0844	6.0714	6.127	7.0321	6.2177	6.0563	6.9058	6.3996	6.6539	6.1064	5.5117	5.6223	6.5379	5.9659	6.0358	5.7024	8.2512	12.5558	9.3114	9.54	8.1691	6.6112	7.0408	6.4298	6.388	6.3764	6.3857	5.9413	7.9913	8.6421	11.8864	8.6663	7.7226	8.9502	8.6432	8.0105	10.5407	9.8389	11.6659	13.0446	13.2019	11.2177	12.9392	12.1247	12.7412	9.9233	13.3123
548	6.1399	6.2554	6.0937	6.1058	6.1715	7.0628	6.2268	6.0797	6.9228	6.4172	6.6727	6.1161	5.5138	5.6493	6.5587	5.982	6.0852	5.7327	8.2798	12.5562	9.3526	9.5929	8.1872	6.6218	7.0335	6.4454	6.3956	6.3674	6.3836	5.9353	7.9983	8.664	11.8841	8.7235	7.7361	9.0036	8.6708	8.0404	10.6402	9.912	11.6847	13.1081	13.2515	11.2118	12.949	12.141	12.7702	9.9368	13.3616
549	6.1693	6.2988	6.145	6.1304	6.1955	7.1067	6.2504	6.1141	6.9722	6.4299	6.7079	6.1221	5.5386	5.6868	6.5907	6.0213	6.1092	5.7717	8.3013	12.5606	9.3872	9.6089	8.2099	6.6471	7.0688	6.4862	6.4264	6.3923	6.3821	5.9366	8.0176	8.6862	11.895	8.7839	7.7737	9.0384	8.7236	8.0609	10.7115	9.964	11.7065	13.1384	13.2969	11.1917	12.9533	12.161	12.7933	9.9324	13.3947
550	6.2151	6.3536	6.2196	6.1905	6.2476	7.1362	6.3114	6.1741	7.0248	6.468	6.7456	6.1805	5.5823	5.7517	6.6528	6.0887	6.1686	5.8245	8.3647	12.6082	9.4316	9.6615	8.2705	6.6983	7.1466	6.5512	6.4886	6.464	6.4276	5.9888	8.049	8.7215	11.9404	8.8629	7.8227	9.0857	8.7981	8.1194	10.8633	10.0458	11.8031	13.1947	13.4037	11.2264	12.991	12.1682	12.7959	9.9326	13.4485
551	6.2873	6.4242	6.2911	6.2776	6.3067	7.1912	6.3751	6.2411	7.0833	6.5331	6.7975	6.2316	5.6441	5.8111	6.7511	6.1524	6.253	5.9077	8.4544	12.6885	9.5001	9.7174	8.3562	6.7323	7.2263	6.6167	6.5561	6.5095	6.5001	6.0472	8.1181	8.7588	11.9712	8.9426	7.8985	9.1653	8.8773	8.2009	10.9963	10.147	11.8944	13.2874	13.4811	11.2655	13.039	12.1816	12.8603	9.9541	13.54
552	6.3229	6.4807	6.3276	6.3293	6.3546	7.2505	6.4255	6.2876	7.148	6.5745	6.8659	6.2703	5.6759	5.8605	6.8151	6.1843	6.3003	5.952	8.5052	12.77	9.5522	9.7549	8.4081	6.7456	7.2547	6.6324	6.5713	6.5187	6.529	6.0867	8.1557	8.7944	12.0051	9.0104	7.9725	9.2286	8.9446	8.2606	11.0856	10.2509	11.9613	13.3911	13.537	11.2713	13.068	12.2084	12.9038	9.9743	13.5951
553	6.3297	6.497	6.3217	6.3145	6.3699	7.303	6.4544	6.3044	7.2007	6.5797	6.8869	6.2806	5.6976	5.877	6.8217	6.2101	6.3289	5.9782	8.5302	12.8022	9.5638	9.7335	8.4099	6.7501	7.2488	6.637	6.5772	6.5206	6.5122	6.0875	8.1656	8.8071	12.0388	9.0511	7.9913	9.2439	8.9892	8.3116	11.1357	10.3111	12.0078	13.4948	13.5902	11.2744	13.0822	12.1969	12.9011	9.9599	13.6011
554	6.354	6.5118	6.3327	6.325	6.3916	7.321	6.4845	6.3285	7.2204	6.5971	6.9137	6.3115	5.694	5.902	6.8399	6.2227	6.3771	6.0117	8.5657	12.8195	9.5746	9.7452	8.4157	6.7817	7.2465	6.6543	6.5998	6.5354	6.5042	6.0771	8.1811	8.7905	12.0285	9.0839	8.034	9.2854	9.0227	8.3625	11.1959	10.3895	12.0522	13.5461	13.6091	11.2772	13.0295	12.1665	12.8997	9.9658	13.6167
555	6.38	6.5323	6.3469	6.3448	6.3955	7.3274	6.5065	6.3499	7.2265	6.6331	6.9197	6.3275	5.7072	5.9064	6.8477	6.2504	6.4106	6.0458	8.5762	12.8872	9.573	9.7626	8.4337	6.7769	7.2405	6.648	6.6023	6.5438	6.5019	6.0638	8.1681	8.7576	12.0172	9.0921	8.064	9.3166	9.0618	8.3648	11.2798	10.4773	12.0848	13.5539	13.637	11.2414	13.0072	12.1425	12.8979	9.9545	13.6261
556	6.417	6.5641	6.3809	6.3681	6.4303	7.3598	6.5252	6.3953	7.2556	6.6742	6.9295	6.3576	5.7357	5.9292	6.8743	6.2781	6.4505	6.099	8.6134	12.9503	9.6055	9.8125	8.4475	6.7797	7.2467	6.6401	6.5991	6.5643	6.5433	6.0812	8.1871	8.7753	12.0327	9.172	8.1286	9.3335	9.1257	8.4036	11.4041	10.5774	12.1177	13.6329	13.6898	11.2217	13.0242	12.1873	12.8849	9.9891	13.6633
557	6.444	6.5785	6.4159	6.3828	6.4441	7.4007	6.5377	6.4122	7.2641	6.7105	6.9586	6.3906	5.768	5.949	6.8997	6.316	6.4973	6.1562	8.6417	12.9749	9.6508	9.8448	8.4818	6.7771	7.2318	6.6447	6.5984	6.5522	6.5605	6.0839	8.2069	8.8237	12.0402	9.2388	8.1578	9.3774	9.175	8.4507	11.5193	10.6529	12.1594	13.7609	13.7525	11.2477	13.0379	12.1985	12.8943	9.9943	13.7219
558	6.4633	6.6017	6.4463	6.431	6.4549	7.4458	6.5615	6.422	7.2896	6.7045	6.9799	6.4137	5.7751	5.9686	6.9325	6.3521	6.5547	6.2091	8.6946	12.9825	9.6898	9.8505	8.5206	6.7885	7.2455	6.6575	6.613	6.5653	6.5492	6.0799	8.226	8.8405	12.0563	9.2993	8.1736	9.4153	9.2191	8.4855	11.6035	10.7173	12.2006	13.8479	13.8346	11.2734	13.0378	12.1788	12.8849	9.9881	13.7479
559	6.5235	6.662	6.5139	6.5011	6.516	7.4986	6.6301	6.4874	7.3643	6.7523	7.0381	6.4611	5.8178	6.0446	6.9923	6.4167	6.6335	6.2838	8.7705	13.0454	9.7472	9.8804	8.5732	6.8449	7.2842	6.6985	6.6629	6.5851	6.5786	6.1135	8.2677	8.8945	12.1255	9.356	8.244	9.4823	9.2815	8.5655	11.7301	10.8144	12.2792	13.9468	13.9428	11.3003	13.0796	12.1809	12.9213	10.0008	13.812
560	6.5639	6.688	6.57	6.5348	6.5649	7.5341	6.6743	6.5282	7.4174	6.8074	7.0938	6.5062	5.8684	6.0996	7.0514	6.4856	6.713	6.368	8.8029	13.1049	9.7822	9.9037	8.596	6.8736	7.2923	6.7062	6.6688	6.5963	6.6197	6.1734	8.3004	8.9512	12.1659	9.4145	8.3111	9.5478	9.3649	8.6372	11.848	10.9342	12.3585	14.0706	14.022	11.3154	13.1132	12.221	12.9786	10.0161	13.8851
561	6.5538	6.7042	6.5752	6.5229	6.5606	7.5549	6.6835	6.5269	7.4342	6.8067	7.1209	6.517	5.8808	6.1184	7.0853	6.4955	6.7359	6.3837	8.8166	13.1147	9.7746	9.8945	8.6194	6.8454	7.2652	6.655	6.6352	6.5728	6.6321	6.1863	8.2957	8.9428	12.1814	9.4314	8.3649	9.5736	9.4104	8.6767	11.9306	10.9739	12.4146	14.09	14.0538	11.3211	13.105	12.2195	13.0071	10.0141	13.9161
562	6.5458	6.7041	6.5934	6.539	6.5629	7.5692	6.7139	6.5541	7.4384	6.8052	7.1188	6.5216	5.884	6.1341	7.1238	6.4998	6.7801	6.4148	8.8321	13.1638	9.7753	9.9024	8.667	6.7983	7.2288	6.6414	6.6074	6.5441	6.6095	6.1625	8.2834	8.9464	12.1494	9.4578	8.3823	9.5776	9.444	8.6863	12.0154	11.0085	12.4591	14.1066	14.0689	11.319	13.0728	12.2273	12.9663	10.0472	13.9196
563	6.5895	6.7507	6.633	6.5822	6.6051	7.5947	6.7748	6.5892	7.4822	6.8415	7.1533	6.5522	5.9044	6.1783	7.1595	6.5396	6.8436	6.4617	8.8835	13.2235	9.7939	9.9332	8.7164	6.8089	7.2559	6.6666	6.6372	6.5578	6.6256	6.186	8.2818	8.9654	12.1162	9.5037	8.4106	9.6133	9.4906	8.7465	12.0915	11.0796	12.5311	14.1641	14.1098	11.3437	13.0432	12.2291	12.944	10.0632	13.9265
564	6.6424	6.8022	6.6632	6.6348	6.6449	7.6337	6.8269	6.6338	7.522	6.8996	7.2037	6.5873	5.9458	6.2595	7.2077	6.6253	6.9159	6.5706	8.9406	13.2867	9.8242	9.9895	8.7259	6.8497	7.2873	6.6971	6.6652	6.5957	6.6632	6.2368	8.3286	8.9866	12.1664	9.5594	8.4624	9.6771	9.5727	8.8224	12.1927	11.1853	12.5874	14.2429	14.2001	11.3794	13.0563	12.2439	12.9879	10.0847	14.0149
565	6.6694	6.832	6.6877	6.6397	6.6595	7.6753	6.8695	6.6661	7.5511	6.9408	7.2283	6.6125	5.9849	6.2902	7.2481	6.6679	6.9955	6.6563	8.9512	13.2995	9.8558	10.0092	8.749	6.856	7.2891	6.7127	6.6619	6.5868	6.6881	6.2611	8.3567	9.032	12.2147	9.6079	8.5146	9.7379	9.6369	8.9051	12.2892	11.2741	12.6369	14.3515	14.3127	11.4018	13.0865	12.2522	13.0144	10.1013	14.0834
566	6.6939	6.8615	6.7404	6.6807	6.6898	7.7232	6.9214	6.7068	7.5853	6.9902	7.267	6.6663	6.0387	6.336	7.3054	6.7091	7.0987	6.7216	8.9836	13.3145	9.8963	10.045	8.7963	6.8379	7.2714	6.7193	6.6605	6.5779	6.7146	6.2676	8.3814	9.0595	12.281	9.6697	8.5804	9.8082	9.7076	8.9879	12.4024	11.3815	12.699	14.4472	14.3764	11.4096	13.1254	12.2501	13.0271	10.1319	14.0991
567	6.7369	6.9012	6.834	6.7503	6.7529	7.802	7.0026	6.7741	7.6426	7.0337	7.3311	6.7315	6.1	6.4037	7.3704	6.7819	7.2245	6.8301	9.0846	13.3869	9.9469	10.0847	8.86	6.8558	7.3103	6.7409	6.6869	6.6051	6.765	6.3003	8.4297	9.1142	12.3381	9.7525	8.637	9.8929	9.7895	9.0625	12.5613	11.4774	12.7666	14.5701	14.462	11.4756	13.1736	12.288	13.0527	10.1714	14.1417
568	6.7914	6.9597	6.8925	6.7767	6.8032	7.8668	7.0702	6.8405	7.7025	7.0784	7.4016	6.7644	6.1419	6.4637	7.4485	6.8632	7.3369	6.9657	9.1499	13.4315	10.012	10.1211	8.9327	6.8889	7.3218	6.7748	6.7313	6.6469	6.8235	6.3537	8.4829	9.165	12.3841	9.8398	8.7214	9.9635	9.8694	9.1396	12.7077	11.5837	12.8416	14.6996	14.5733	11.5389	13.2026	12.3407	13.1	10.2246	14.1871
569	6.8093	6.9936	6.8861	6.787	6.8237	7.9069	7.1283	6.8607	7.7408	7.126	7.4429	6.7864	6.1911	6.5265	7.5186	6.9106	7.407	7.0573	9.1798	13.4434	10.0214	10.1501	8.9423	6.8786	7.2985	6.762	6.7365	6.6506	6.8339	6.3806	8.5181	9.1898	12.3831	9.912	8.7827	10.0115	9.9167	9.2075	12.8163	11.6571	12.9061	14.8116	14.624	11.5553	13.2017	12.3599	13.1323	10.238	14.2279
570	6.8289	7.0233	6.914	6.8318	6.86	7.9678	7.1706	6.8959	7.7699	7.1821	7.4926	6.8101	6.2341	6.5932	7.5955	6.9614	7.5027	7.1198	9.2237	13.4629	10.025	10.1611	8.9504	6.8752	7.323	6.7351	6.7266	6.6566	6.8389	6.3816	8.5192	9.1978	12.3991	9.9757	8.8338	10.0711	9.9754	9.2764	12.9404	11.7335	12.9926	14.9227	14.6745	11.581	13.2317	12.3678	13.1716	10.2422	14.2509
571	6.9003	7.0746	6.9911	6.9021	6.9135	8.0186	7.2534	6.9713	7.8438	7.2318	7.5642	6.8782	6.2931	6.6691	7.6607	7.069	7.6229	7.2225	9.2763	13.5393	10.0898	10.1897	9.0087	6.9142	7.3676	6.7687	6.7611	6.671	6.8874	6.437	8.5659	9.2375	12.446	10.0391	8.9173	10.1419	10.0646	9.3714	13.0702	11.8268	13.0715	15.024	14.755	11.6287	13.3084	12.4015	13.226	10.2874	14.2865
572	6.974	7.1447	7.0627	6.9829	6.9965	8.0841	7.3502	7.0505	7.9369	7.3055	7.6265	6.9427	6.3573	6.7619	7.749	7.1783	7.7477	7.3711	9.3439	13.6309	10.1671	10.2268	9.0627	6.966	7.4033	6.8286	6.8221	6.7359	6.9346	6.491	8.6194	9.2923	12.4977	10.1297	8.9856	10.2037	10.1483	9.4568	13.1778	11.8952	13.1626	15.094	14.8574	11.6684	13.3671	12.4325	13.2806	10.3329	14.3518
573	7.0621	7.2433	7.1648	7.0697	7.0907	8.186	7.4519	7.1424	8.0231	7.4048	7.7192	7.0223	6.4369	6.8711	7.846	7.2621	7.9003	7.5248	9.4488	13.6986	10.2171	10.2851	9.1565	7.0272	7.4514	6.8857	6.8838	6.8077	6.9849	6.5502	8.6621	9.3452	12.5715	10.2292	9.0669	10.2904	10.2523	9.5614	13.2782	11.9989	13.1992	15.1842	14.9264	11.6907	13.4051	12.467	13.293	10.3417	14.4378
574	7.1123	7.3109	7.2274	7.1233	7.154	8.2588	7.5335	7.1926	8.0804	7.4486	7.7751	7.0743	6.4897	6.9466	7.9307	7.3227	8.0198	7.6384	9.5159	13.7451	10.2604	10.3304	9.1908	7.0706	7.5213	6.9408	6.9073	6.8387	7.0238	6.5751	8.7002	9.3812	12.6044	10.3012	9.1451	10.3589	10.3191	9.6436	13.3542	12.078	13.2218	15.3132	14.9982	11.7192	13.4265	12.515	13.3427	10.3788	14.4817
575	7.1619	7.3634	7.2832	7.172	7.1904	8.308	7.5954	7.2224	8.1353	7.4876	7.842	7.1069	6.5564	7.0018	8.0146	7.3714	8.1261	7.7366	9.553	13.7471	10.2825	10.378	9.2273	7.0959	7.5599	6.9783	6.9071	6.8689	7.0387	6.5954	8.7226	9.4026	12.649	10.3543	9.221	10.4089	10.3941	9.72	13.4731	12.1567	13.268	15.4543	15.0456	11.7453	13.4566	12.5494	13.3631	10.431	14.488
576	7.22	7.412	7.3383	7.2178	7.2199	8.3802	7.6814	7.2723	8.1942	7.5529	7.8929	7.1405	6.6257	7.0723	8.0928	7.4796	8.2523	7.8636	9.5847	13.7766	10.3235	10.4037	9.2878	7.1042	7.6052	7.0022	6.9503	6.93	7.0977	6.6385	8.7668	9.4506	12.7205	10.4434	9.2992	10.5	10.4731	9.8208	13.5858	12.2405	13.327	15.6009	15.1062	11.7577	13.4594	12.5494	13.3779	10.4707	14.5328
577	7.2787	7.4806	7.3915	7.2721	7.2787	8.4524	7.7755	7.3475	8.2115	7.587	7.9349	7.1723	6.677	7.1568	8.1631	7.5736	8.4017	7.9884	9.613	13.8288	10.3719	10.4229	9.3121	7.1481	7.6079	7.0362	7.0098	6.9664	7.1113	6.6688	8.789	9.5052	12.7635	10.5143	9.3451	10.5603	10.5408	9.8873	13.7089	12.3108	13.3555	15.681	15.189	11.7852	13.4711	12.5422	13.3786	10.5052	14.5591
578	7.3277	7.5438	7.4575	7.3222	7.3417	8.5115	7.8569	7.3959	8.2786	7.6599	7.9859	7.2326	6.7292	7.2365	8.2486	7.655	8.5611	8.1252	9.677	13.8784	10.3978	10.4583	9.3642	7.19	7.632	7.08	7.0458	7.002	7.1318	6.6896	8.8187	9.5439	12.794	10.5778	9.4135	10.6348	10.6085	9.9559	13.8326	12.3892	13.4229	15.7363	15.2906	11.8242	13.4974	12.572	13.4013	10.5465	14.6046
579	7.3365	7.5573	7.5017	7.3719	7.3626	8.5669	7.9295	7.441	8.3237	7.7125	8.0509	7.2905	6.759	7.2989	8.3186	7.742	8.7169	8.2669	9.7378	13.8917	10.4025	10.4867	9.3837	7.1856	7.6392	7.0972	7.0375	7.0221	7.1632	6.7027	8.8344	9.5484	12.8638	10.653	9.4739	10.6744	10.66	10.0398	13.9324	12.465	13.4911	15.7428	15.3821	11.8277	13.4971	12.5878	13.4276	10.5693	14.6442
580	7.3491	7.5708	7.5404	7.3997	7.3811	8.5949	8.022	7.4793	8.3554	7.7542	8.0963	7.327	6.8007	7.3714	8.4012	7.7989	8.844	8.4074	9.7807	13.8766	10.4011	10.4836	9.4074	7.1448	7.5898	7.0665	7.01	6.9792	7.1659	6.7035	8.8152	9.5623	12.8857	10.697	9.4875	10.7236	10.7155	10.1134	14.019	12.5467	13.5175	15.7398	15.44	11.8129	13.4918	12.5933	13.4454	10.5485	14.6773
581	7.3812	7.5944	7.5973	7.434	7.4093	8.6298	8.0819	7.5026	8.3936	7.8055	8.1523	7.3613	6.8502	7.4565	8.4857	7.8559	8.9919	8.5352	9.8196	13.8687	10.4181	10.4924	9.42	7.1224	7.5583	7.0602	6.98	6.9293	7.1518	6.7138	8.8263	9.558	12.9054	10.7274	9.5512	10.7827	10.8058	10.1684	14.0893	12.5952	13.537	15.7868	15.4853	11.787	13.474	12.5749	13.4705	10.5186	14.704
582	7.4205	7.6809	7.6618	7.4886	7.4483	8.7031	8.1928	7.5395	8.4583	7.884	8.2097	7.4014	6.8972	7.5686	8.5627	7.9624	9.1591	8.677	9.8728	13.8826	10.4289	10.5423	9.4517	7.1523	7.5637	7.0856	6.9762	6.9592	7.1689	6.7391	8.8588	9.5729	12.95	10.8145	9.6307	10.8351	10.8997	10.2208	14.2349	12.6499	13.5708	15.8673	15.5147	11.8187	13.5209	12.5821	13.4835	10.5269	14.7629
583	7.4603	7.7469	7.7229	7.5628	7.5003	8.7805	8.2995	7.6212	8.5424	7.9334	8.2825	7.4564	6.9704	7.6672	8.6586	8.0512	9.3441	8.8215	9.9197	13.9004	10.4676	10.5997	9.5006	7.1566	7.5973	7.0905	6.993	6.9999	7.2131	6.7599	8.8795	9.6171	12.9807	10.8819	9.698	10.902	10.9482	10.3046	14.2895	12.6983	13.6265	15.9982	15.5838	11.868	13.5542	12.5842	13.4721	10.5306	14.8048
584	7.5505	7.8183	7.8208	7.6535	7.5693	8.8837	8.45	7.7277	8.6186	8.0312	8.3751	7.5367	7.0851	7.7947	8.7896	8.1614	9.5493	9.0325	9.997	13.9203	10.5541	10.6657	9.5627	7.1715	7.6533	7.1342	7.0486	7.04	7.2725	6.8075	8.9105	9.651	13.0129	10.9733	9.7834	10.9922	11.0236	10.42	14.3515	12.7572	13.6803	16.18	15.6685	11.8996	13.5522	12.5992	13.4578	10.5462	14.8596
585	7.6631	7.8976	7.9141	7.7402	7.6499	9.0049	8.5976	7.7979	8.6949	8.1311	8.5	7.6359	7.2113	7.9215	8.9147	8.292	9.7971	9.2791	10.0704	13.9511	10.6085	10.7487	9.6345	7.2168	7.7151	7.2035	7.104	7.0698	7.3061	6.8609	8.9596	9.7044	13.0614	11.0339	9.857	11.092	11.1207	10.5123	14.4714	12.8074	13.7169	16.2964	15.7456	11.9392	13.5851	12.6278	13.4864	10.5889	14.9092
586	7.7195	7.9646	7.981	7.7984	7.6925	9.0896	8.7104	7.8499	8.7543	8.1948	8.5928	7.715	7.2749	8.0109	9.0069	8.3897	9.9657	9.4628	10.1052	13.9607	10.6651	10.7841	9.6719	7.2392	7.7439	7.2172	7.1253	7.1021	7.3193	6.8968	8.9926	9.7535	13.1265	11.0996	9.9143	11.1536	11.1849	10.5904	14.5367	12.8843	13.7751	16.386	15.8034	11.9914	13.6055	12.6462	13.5401	10.6179	14.9346
587	7.7507	8.0489	8.0693	7.8391	7.7268	9.1864	8.8359	7.8655	8.8036	8.26	8.6632	7.7566	7.3388	8.0787	9.0825	8.4788	10.2227	9.664	10.1122	13.9699	10.7061	10.7956	9.6933	7.23	7.7203	7.1887	7.1321	7.1126	7.3164	6.9102	8.9915	9.7559	13.1604	11.1206	9.9465	11.1779	11.2332	10.6876	14.6136	12.9431	13.7706	16.4515	15.866	11.9835	13.5981	12.6333	13.5422	10.6327	14.9312
588	7.7722	8.0877	8.1334	7.8796	7.7618	9.246	8.9271	7.8901	8.8631	8.3143	8.7017	7.7887	7.374	8.1936	9.1532	8.5941	10.4421	9.8539	10.1	13.9769	10.7166	10.7543	9.6716	7.2258	7.7204	7.1686	7.1249	7.0906	7.3181	6.9075	8.9867	9.7439	13.1485	11.1649	10.0012	11.1931	11.2737	10.7368	14.7245	12.9975	13.7611	16.5095	15.9483	11.983	13.5793	12.5952	13.5142	10.6104	14.9471
589	7.8312	8.1379	8.205	7.9279	7.8243	9.312	9.083	7.9337	8.919	8.3856	8.7806	7.8555	7.4443	8.3263	9.2454	8.7008	10.6782	10.0581	10.1173	13.9776	10.6976	10.7755	9.6688	7.2324	7.7394	7.1885	7.1405	7.1188	7.321	6.9328	9.0067	9.7542	13.1955	11.2518	10.0481	11.2351	11.3238	10.802	14.813	13.0328	13.7862	16.5477	16.0187	12.0027	13.5664	12.5869	13.5308	10.6468	14.9614
590	7.9228	8.2024	8.3056	8.0228	7.8832	9.4115	9.2461	8.0271	8.9808	8.4772	8.8754	7.9148	7.5483	8.4735	9.3577	8.8319	10.9655	10.2809	10.1844	13.9811	10.7272	10.8355	9.7324	7.2677	7.7367	7.2444	7.1825	7.1441	7.3649	6.9388	9.0458	9.7835	13.2275	11.3303	10.1	11.3409	11.4141	10.8926	14.8788	13.0816	13.8267	16.6158	16.0742	12.0346	13.5592	12.6237	13.4964	10.6819	15.0173
591	8.0536	8.3491	8.4576	8.1598	7.9933	9.5741	9.4169	8.134	9.1153	8.6103	9.0269	8.0071	7.6801	8.644	9.5026	9.0138	11.2246	10.5757	10.2899	14.0544	10.8113	10.8904	9.7869	7.359	7.8237	7.3352	7.2621	7.2116	7.432	6.9894	9.0853	9.8499	13.2818	11.4173	10.195	11.4576	11.5376	11.0282	15.0053	13.1383	13.9323	16.7525	16.2132	12.0815	13.5893	12.6545	13.5289	10.7383	15.1097
592	8.1943	8.5084	8.6154	8.3356	8.1478	9.7266	9.6271	8.2247	9.2367	8.7106	9.183	8.1376	7.8162	8.8126	9.6673	9.1836	11.5553	10.8744	10.3865	14.1214	10.8989	10.9263	9.8774	7.4306	7.9033	7.4073	7.3626	7.3333	7.4887	7.0445	9.1467	9.911	13.3431	11.4942	10.2825	11.5264	11.6218	11.1369	15.1397	13.2408	13.9883	16.8683	16.2993	12.1288	13.6426	12.687	13.5961	10.7768	15.1613
593	8.3057	8.6616	8.7638	8.469	8.2755	9.849	9.8679	8.3166	9.332	8.8485	9.3117	8.2464	7.9624	8.9647	9.8378	9.3196	11.8899	11.1772	10.4545	14.2051	10.9178	10.9811	9.9317	7.5025	7.9667	7.4678	7.4499	7.4163	7.5515	7.0979	9.1849	9.9728	13.3685	11.5583	10.3743	11.5944	11.708	11.2159	15.2426	13.3388	14.0334	17.0051	16.3334	12.178	13.6685	12.7229	13.5995	10.8009	15.1867
594	8.3613	8.7461	8.8839	8.5594	8.3409	9.9606	10.0717	8.397	9.4362	8.9789	9.4175	8.3266	8.0744	9.1311	9.9804	9.4472	12.1715	11.4399	10.4886	14.2526	10.9317	11.0182	9.9385	7.518	7.9683	7.5092	7.4729	7.3907	7.5527	7.1301	9.1835	10.0069	13.4303	11.6287	10.4352	11.6288	11.7634	11.2748	15.2921	13.4046	14.052	17.084	16.3875	12.2103	13.647	12.734	13.5987	10.7801	15.1964
595	8.4328	8.8463	8.9795	8.6552	8.3956	10.0946	10.2665	8.4462	9.525	9.0753	9.5213	8.4165	8.1534	9.2424	10.1224	9.5954	12.4831	11.7343	10.5323	14.2872	10.9745	11.0481	9.9431	7.4879	7.96	7.4948	7.4466	7.3932	7.5386	7.1168	9.1847	9.9745	13.4666	11.68	10.4559	11.678	11.8128	11.354	15.345	13.4222	14.0968	17.1164	16.4479	12.2388	13.6126	12.7295	13.6002	10.7555	15.2133
596	8.5569	8.9786	9.1392	8.7874	8.496	10.2173	10.4902	8.5196	9.6345	9.189	9.6676	8.5084	8.2609	9.3894	10.2794	9.7559	12.8097	12.0528	10.5809	14.3709	11.0031	11.0698	9.9801	7.5158	7.9928	7.5145	7.4927	7.4225	7.5772	7.1231	9.2134	9.9641	13.5191	11.7355	10.514	11.756	11.9145	11.4663	15.4667	13.4467	14.1538	17.1785	16.5133	12.2806	13.6159	12.7767	13.6173	10.77	15.2879
597	8.697	9.1383	9.2943	8.9429	8.6383	10.2985	10.7214	8.5898	9.7185	9.3063	9.8038	8.589	8.3568	9.545	10.4508	9.9029	13.1429	12.387	10.6126	14.3899	10.9963	11.0447	9.9989	7.5378	8.0278	7.5497	7.52	7.4618	7.5784	7.125	9.2363	9.9773	13.5218	11.7888	10.5743	11.8323	11.9704	11.5475	15.5426	13.487	14.1917	17.2238	16.5561	12.2921	13.5957	12.7691	13.6007	10.7718	15.3323
598	8.851	9.324	9.4768	9.1095	8.769	10.4392	10.9603	8.6595	9.8217	9.4547	9.9377	8.674	8.5002	9.7041	10.5874	10.0468	13.4934	12.7095	10.6199	14.4126	11.0141	11.0963	10.0207	7.5896	8.0923	7.6096	7.5604	7.5308	7.6076	7.1563	9.2392	10.0116	13.5083	11.8503	10.6215	11.8894	12.0116	11.6401	15.5859	13.5475	14.2178	17.239	16.6319	12.2639	13.5986	12.7457	13.6066	10.8031	15.321
599	8.9917	9.4893	9.6247	9.2343	8.8776	10.59	11.1958	8.7472	9.8877	9.5599	10.0573	8.7669	8.6008	9.8508	10.6997	10.1749	13.7734	12.9588	10.6652	14.4454	11.0295	11.1591	10.072	7.6349	8.1376	7.6759	7.593	7.597	7.6328	7.1778	9.2478	10.0086	13.4904	11.8861	10.6757	11.9389	12.0564	11.681	15.6474	13.585	14.2348	17.2464	16.6891	12.2469	13.5927	12.7364	13.5991	10.8268	15.322
600	9.1663	9.756	9.8537	9.4598	9.0328	10.8143	11.504	8.8588	10.0559	9.7551	10.2617	8.9302	8.7706	10.0797	10.8996	10.4028	14.2412	13.35	10.7526	14.534	11.1241	11.2247	10.1575	7.7329	8.2153	7.7682	7.6684	7.6784	7.7002	7.2274	9.2901	10.0396	13.5615	11.9378	10.7842	12.0392	12.1683	11.8157	15.7696	13.7107	14.2694	17.335	16.8331	12.2854	13.6657	12.7868	13.6332	10.9235	15.4156
601	9.3211	9.9701	10.0071	9.6259	9.1762	10.9874	11.7601	8.944	10.1795	9.9262	10.4564	9.069	8.8962	10.2792	11.0854	10.5707	14.6207	13.7551	10.8383	14.5736	11.182	11.2168	10.2157	7.7166	8.2503	7.7694	7.6813	7.6884	7.7013	7.2258	9.2883	10.041	13.5384	11.9812	10.8116	12.0686	12.2368	11.8554	15.856	13.7755	14.3063	17.399	16.8835	12.3238	13.6603	12.805	13.6369	10.8897	15.4071
602	9.4691	10.1728	10.1917	9.8007	9.3004	11.1267	11.9798	9.0149	10.262	10.0871	10.6043	9.1971	9.0372	10.4485	11.2639	10.7513	14.9815	14.0991	10.8415	14.5788	11.1938	11.2328	10.2332	7.6815	8.2288	7.7501	7.6687	7.6791	7.7349	7.2287	9.3047	10.0589	13.537	12.0407	10.822	12.1073	12.3143	11.9029	15.9419	13.8255	14.3492	17.4843	16.8871	12.337	13.6217	12.7995	13.6233	10.8506	15.3684
603	9.651	10.4129	10.4038	10.0084	9.4513	11.3164	12.2492	9.1039	10.3839	10.2643	10.7739	9.3034	9.1905	10.6675	11.4655	10.954	15.3717	14.4636	10.8666	14.6054	11.2351	11.3041	10.2254	7.714	8.2367	7.7824	7.6817	7.7174	7.7423	7.2627	9.3368	10.076	13.5671	12.1136	10.8861	12.1966	12.4236	12.0372	16.0325	13.8879	14.446	17.5741	16.9326	12.3799	13.6175	12.8755	13.6543	10.8748	15.4558
604	9.7952	10.6354	10.6001	10.1644	9.5653	11.4694	12.5194	9.158	10.4706	10.3659	10.918	9.3602	9.2771	10.7647	11.6228	11.0663	15.733	14.7696	10.8591	14.551	11.251	11.2732	10.2171	7.6618	8.1829	7.7361	7.6195	7.6496	7.7138	7.2465	9.3011	10.0631	13.5637	12.0882	10.8884	12.2158	12.4214	12.0634	16.0522	13.8843	14.4295	17.5699	16.9482	12.3565	13.5425	12.882	13.5998	10.846	15.4688
605	9.9805	10.8772	10.8373	10.3839	9.7502	11.6387	12.8077	9.2188	10.6058	10.5145	11.1084	9.4804	9.4302	10.9235	11.7562	11.2167	16.1485	15.1301	10.9013	14.5643	11.2881	11.2339	10.2382	7.6552	8.1402	7.7106	7.5838	7.6102	7.7247	7.2424	9.2786	10.0487	13.5887	12.0813	10.8947	12.2451	12.4603	12.0983	16.0713	13.8737	14.4005	17.576	17.0055	12.3525	13.4797	12.8345	13.5633	10.8175	15.4426
606	10.2638	11.2359	11.1339	10.6877	10.001	11.8904	13.1791	9.3769	10.7955	10.7656	11.3495	9.6605	9.6399	11.1458	11.9644	11.3952	16.6054	15.5417	11.0448	14.6305	11.3723	11.3588	10.3148	7.7481	8.2386	7.7868	7.6777	7.6855	7.7783	7.3128	9.3392	10.1181	13.6413	12.1644	10.9456	12.3316	12.5362	12.1892	16.0927	13.9113	14.4524	17.6238	17.1068	12.3849	13.5328	12.8357	13.6036	10.881	15.561
607	10.561	11.5598	11.471	11.0023	10.2658	12.1911	13.5345	9.5295	11.0093	11.0101	11.5868	9.9014	9.8507	11.3872	12.1609	11.6402	17.0712	15.9988	11.1471	14.6608	11.4585	11.4329	10.3911	7.8509	8.3229	7.9059	7.8097	7.8066	7.8497	7.3687	9.412	10.1482	13.6538	12.279	11.0513	12.4217	12.6473	12.2777	16.2113	13.9859	14.5471	17.6885	17.1928	12.3844	13.6067	12.8698	13.6517	10.9394	15.6395
608	10.8662	11.8702	11.7763	11.2833	10.4703	12.3824	13.8823	9.6028	11.1247	11.186	11.7521	10.0559	10.0078	11.5737	12.308	11.8165	17.4963	16.4158	11.1672	14.6976	11.4622	11.4466	10.4228	7.8929	8.4133	7.9983	7.902	7.8784	7.8574	7.3655	9.4254	10.138	13.651	12.3059	11.0904	12.4447	12.6889	12.3228	16.2502	13.9967	14.5769	17.7204	17.2314	12.3765	13.5933	12.8538	13.6459	10.947	15.6802
609	11.1124	12.2265	12.0153	11.5651	10.6431	12.5556	14.2538	9.6888	11.2389	11.4031	11.9116	10.1997	10.1467	11.7377	12.4557	11.9863	17.9211	16.7971	11.1866	14.7315	11.4726	11.4106	10.4323	7.9492	8.4501	8.0363	7.9278	7.9222	7.8441	7.3671	9.4207	10.1445	13.6552	12.3584	11.1196	12.5008	12.7441	12.3665	16.2929	14.0042	14.6234	17.7481	17.2693	12.4008	13.5388	12.816	13.6118	10.9522	15.6944
610	11.3902	12.5927	12.2952	11.8494	10.8643	12.7607	14.6025	9.794	11.3821	11.6153	12.1313	10.3791	10.3106	11.9479	12.6716	12.2012	18.3411	17.1466	11.2234	14.7719	11.4869	11.4089	10.4509	7.9873	8.4382	8.0677	7.9456	7.931	7.878	7.3963	9.4222	10.2004	13.6805	12.4061	11.1525	12.5817	12.7971	12.4169	16.3559	14.059	14.6274	17.888	17.321	12.4305	13.533	12.8559	13.6179	11.0256	15.7335
611	11.6232	12.9288	12.5575	12.1102	11.0658	12.9719	14.8826	9.8617	11.5046	11.7914	12.3256	10.5347	10.444	12.135	12.8305	12.353	18.7199	17.5014	11.219	14.7846	11.4994	11.4447	10.4467	7.9608	8.4383	8.0236	7.9285	7.9156	7.8658	7.3885	9.4155	10.2132	13.6421	12.429	11.1744	12.5952	12.8215	12.4115	16.417	14.059	14.5791	17.9852	17.3422	12.3967	13.5244	12.8329	13.5883	11.0147	15.7689
612	11.8865	13.2765	12.8374	12.3946	11.2748	13.1824	15.188	9.9075	11.6295	11.96	12.5175	10.6656	10.6142	12.319	12.996	12.5047	19.1009	17.9081	11.226	14.8091	11.5082	11.4518	10.4696	7.9353	8.4254	8.0218	7.9298	7.9542	7.8531	7.3966	9.453	10.2096	13.6502	12.4339	11.2032	12.6323	12.8454	12.4771	16.4795	14.0807	14.5711	17.9967	17.4094	12.4189	13.5117	12.8087	13.5523	11.0102	15.7814
613	12.1287	13.5805	13.08	12.6355	11.4755	13.3816	15.4537	10.0108	11.7998	12.1402	12.701	10.8225	10.7598	12.4711	13.1351	12.648	19.4097	18.2081	11.221	14.84	11.515	11.4907	10.5098	7.966	8.4281	8.0417	7.942	7.9741	7.878	7.422	9.474	10.239	13.6747	12.4919	11.2512	12.6725	12.9063	12.555	16.5267	14.144	14.5912	18.0531	17.4679	12.4543	13.5678	12.8283	13.5954	11.0074	15.801
614	12.5059	14.0595	13.4522	13.0023	11.7851	13.6751	15.8207	10.1738	12.0073	12.4007	13.0104	11.0406	10.9739	12.7028	13.3602	12.891	19.8278	18.6294	11.3197	14.979	11.6091	11.5549	10.5575	8.0175	8.5258	8.1377	8.029	8.0708	7.9575	7.4982	9.5544	10.3034	13.79	12.5678	11.3666	12.7973	13.0119	12.6768	16.6283	14.2847	14.6549	18.1082	17.5562	12.5008	13.6449	12.8923	13.672	11.0679	15.852
615	12.8391	14.5324	13.7933	13.3429	12.0651	13.9397	16.1924	10.3075	12.1912	12.6953	13.2811	11.2352	11.1386	12.9427	13.5909	13.0932	20.2466	19.0234	11.4183	15.0502	11.6439	11.5817	10.6019	8.067	8.5764	8.2176	8.0524	8.1152	7.9965	7.519	9.5738	10.3278	13.8028	12.6465	11.478	12.9274	13.0969	12.7683	16.7042	14.3783	14.7163	18.0974	17.6357	12.556	13.702	12.9866	13.7379	11.0935	15.913
616	13.1396	14.936	14.1301	13.6691	12.3316	14.2318	16.5474	10.4314	12.388	12.9301	13.5017	11.4226	11.3212	13.1625	13.7536	13.2963	20.7039	19.4163	11.4677	15.0509	11.6581	11.6029	10.6504	8.1127	8.5701	8.2444	8.0663	8.1322	8.0098	7.5581	9.5916	10.3661	13.8222	12.7209	11.5181	12.978	13.1916	12.834	16.7422	14.4372	14.7613	18.0993	17.7477	12.5669	13.6863	12.9967	13.7823	11.1192	15.9635
617	13.4974	15.3761	14.4539	14.0362	12.625	14.4943	16.8835	10.5163	12.5775	13.1291	13.6764	11.5971	11.4768	13.3075	13.8865	13.4594	21.0761	19.7802	11.4681	15.0574	11.6983	11.6498	10.6945	8.133	8.5912	8.2362	8.1122	8.1619	8.0428	7.5782	9.6384	10.42	13.8698	12.7659	11.5263	12.9882	13.2374	12.8871	16.8053	14.4617	14.8317	18.1085	17.7866	12.5617	13.6594	12.9917	13.7605	11.0979	16.0174
618	13.8543	15.8041	14.7683	14.4014	12.8902	14.7231	17.2277	10.6012	12.7727	13.3337	13.8959	11.7711	11.6332	13.4792	14.0587	13.6176	21.4778	20.1758	11.5089	15.0199	11.7669	11.682	10.7378	8.1692	8.6468	8.2799	8.1203	8.2094	8.0602	7.5839	9.6364	10.4394	13.9206	12.8121	11.5824	13.053	13.2982	12.9523	16.8745	14.4633	14.8545	18.1516	17.7885	12.5818	13.6469	12.9835	13.7648	11.0724	16.0896
619	14.2147	16.2553	15.1185	14.7481	13.1893	14.9766	17.5474	10.7315	12.9595	13.5698	14.1776	11.966	11.8488	13.6821	14.237	13.7957	21.893	20.5927	11.5992	14.9927	11.7829	11.714	10.7529	8.204	8.6889	8.3636	8.1887	8.2581	8.0809	7.6177	9.6392	10.4781	13.946	12.8683	11.6667	13.1055	13.3143	13.0266	16.9328	14.4974	14.8617	18.1871	17.8186	12.6089	13.6739	13.0478	13.7758	11.0724	16.1213
620	14.5823	16.7365	15.4988	15.1094	13.5094	15.2038	17.8835	10.8527	13.1579	13.8015	14.4163	12.1828	12.0671	13.8792	14.4343	14.0169	22.2735	20.9877	11.687	15.0219	11.7723	11.7587	10.8337	8.2667	8.7663	8.4328	8.2565	8.3437	8.1127	7.6545	9.6743	10.5116	13.9863	12.9508	11.7229	13.1636	13.3882	13.0854	17.0034	14.5322	14.896	18.2474	17.897	12.643	13.7107	13.0706	13.792	11.1299	16.151
621	14.966	17.3008	15.9311	15.5082	13.8778	15.5393	18.3178	11.0165	13.4068	14.1082	14.7066	12.4475	12.2943	14.1214	14.6627	14.2666	22.7919	21.3952	11.7943	15.1561	11.8724	11.8586	10.9765	8.3914	8.8981	8.5194	8.3663	8.4307	8.2249	7.7527	9.7553	10.6059	14.0699	13.0685	11.7916	13.3089	13.5067	13.2014	17.1205	14.6489	14.9978	18.4314	17.9973	12.742	13.7767	13.1581	13.8705	11.243	16.2992
622	15.3324	17.8341	16.2944	15.878	14.2087	15.8237	18.7858	11.1415	13.6408	14.399	14.9822	12.6454	12.5057	14.3234	14.8817	14.4919	23.2168	21.7869	11.8822	15.2545	11.9368	11.9566	11.0648	8.4616	8.9601	8.5824	8.4805	8.511	8.3026	7.8358	9.8459	10.6938	14.0991	13.1424	11.8283	13.4399	13.6077	13.2889	17.2145	14.749	15.0772	18.5278	18.0646	12.8207	13.819	13.1841	13.8841	11.2702	16.4156
623	15.6927	18.3016	16.6486	16.2783	14.498	16.0687	19.1266	11.2724	13.8253	14.6174	15.1913	12.8214	12.6879	14.5014	15.0397	14.6807	23.5685	22.0828	11.9545	15.3107	11.9933	12.0251	11.1033	8.5124	9.0002	8.653	8.5649	8.5647	8.3434	7.888	9.9261	10.7259	14.1227	13.2038	11.9005	13.4793	13.713	13.3702	17.2304	14.7948	15.1367	18.5574	18.1116	12.8639	13.838	13.188	13.8786	11.3142	16.5044
624	16.0732	18.7343	16.9558	16.6917	14.7515	16.3284	19.4359	11.367	13.9541	14.8465	15.4489	13.0227	12.8275	14.6865	15.1802	14.8372	23.8685	22.3316	11.9935	15.3302	12.0017	12.0785	11.1162	8.5346	9.0359	8.683	8.5754	8.6063	8.3706	7.9109	9.9586	10.7088	14.1525	13.2694	11.9851	13.5424	13.8028	13.4107	17.2591	14.8455	15.1642	18.518	18.2012	12.8807	13.8388	13.2098	13.9144	11.3718	16.5469
625	16.3917	19.2223	17.2808	17.0187	15.0282	16.5862	19.7596	11.4737	14.1275	15.0775	15.6775	13.2353	13.0296	14.8218	15.3409	14.9633	24.2024	22.6408	12.005	15.3707	12.0083	12.0947	11.1303	8.5973	9.0954	8.7189	8.5899	8.6209	8.424	7.9313	9.9845	10.7218	14.2011	13.3458	12.0384	13.6384	13.8564	13.5029	17.333	14.9043	15.2084	18.5229	18.3177	12.9313	13.8847	13.2646	13.9558	11.4114	16.5702
626	16.7103	19.7119	17.6295	17.3377	15.2879	16.8184	20.0429	11.598	14.3167	15.2857	15.8451	13.4029	13.1295	14.9466	15.4659	15.1079	24.4774	22.9403	12.0384	15.38	12.0313	12.0845	11.1356	8.6272	9.1546	8.747	8.6293	8.6717	8.4016	7.926	9.9475	10.7176	14.2078	13.3848	12.0426	13.6567	13.8864	13.5414	17.3432	14.9403	15.1957	18.5521	18.3744	12.9573	13.8718	13.2693	13.9164	11.3969	16.5344
627	16.925	20.0044	17.8923	17.6023	15.4897	17.0255	20.305	11.694	14.4464	15.4687	15.985	13.4925	13.248	15.0776	15.5598	15.2283	24.7716	23.1654	12.0789	15.4158	12.0614	12.1075	11.1714	8.6461	9.2029	8.8243	8.6778	8.7174	8.3961	7.9435	9.948	10.7269	14.2251	13.3938	12.0598	13.6532	13.9108	13.5529	17.3531	14.9853	15.2363	18.54	18.4219	12.9056	13.8603	13.2758	13.9122	11.4044	16.5552
628	17.2961	20.4311	18.2254	17.9201	15.7338	17.2653	20.5393	11.7484	14.5672	15.6613	16.2087	13.6444	13.3609	15.2389	15.6554	15.3737	25.1043	23.415	12.1358	15.4533	12.0802	12.1302	11.19	8.679	9.248	8.8859	8.7172	8.791	8.4025	7.9576	9.9579	10.7207	14.2321	13.4164	12.0813	13.6625	13.9176	13.5628	17.3841	15.0348	15.284	18.5522	18.3898	12.8734	13.8626	13.25	13.9134	11.3839	16.5631
629	17.665	20.8539	18.537	18.2848	16.0101	17.488	20.832	11.856	14.7574	15.8686	16.4283	13.8082	13.4965	15.3585	15.8189	15.527	25.4073	23.7059	12.2014	15.477	12.1027	12.1625	11.202	8.7479	9.3036	8.961	8.7942	8.87	8.4573	7.9995	9.9948	10.7684	14.2689	13.4494	12.1234	13.7344	13.9592	13.6092	17.4778	15.1326	15.3237	18.6585	18.4609	12.9664	13.9057	13.2488	13.9548	11.4315	16.6316
630	17.9552	21.2584	18.8204	18.5788	16.2562	17.7038	21.1362	11.9353	14.9337	16.0885	16.6377	13.9658	13.6431	15.4791	15.9414	15.6684	25.7311	24.001	12.2329	15.4795	12.1145	12.1913	11.2267	8.7721	9.3222	9.0164	8.82	8.9013	8.5021	8.0569	10.0154	10.803	14.3144	13.5343	12.2074	13.8021	14.0396	13.7079	17.5804	15.236	15.3643	18.8143	18.6053	13.0198	13.9607	13.2824	13.9805	11.4411	16.6674
631	18.2405	21.6604	19.0747	18.8338	16.4647	17.8511	21.3574	11.9648	15.0195	16.2328	16.7532	14.0987	13.7601	15.5691	15.9976	15.7717	25.9964	24.3035	12.2467	15.4464	12.0731	12.1731	11.1811	8.7281	9.2729	8.9806	8.8009	8.8647	8.496	8.0496	10.0066	10.8099	14.3276	13.5553	12.2306	13.8422	14.0569	13.7442	17.6252	15.2313	15.4142	18.8752	18.6336	13.0281	13.9215	13.2583	13.9878	11.4299	16.6942
632	18.5038	22.0748	19.4064	19.1013	16.6854	18.0539	21.5833	12.0749	15.1676	16.3998	16.925	14.2899	13.897	15.7027	16.109	15.9216	26.314	24.6102	12.3056	15.43	12.095	12.1605	11.1541	8.739	9.3035	8.982	8.813	8.8953	8.5122	8.0645	10.0142	10.8448	14.3584	13.6197	12.2828	13.91	14.139	13.7858	17.7189	15.2552	15.4866	18.9483	18.6778	13.0837	13.9638	13.2919	13.9899	11.4429	16.7939
633	18.7967	22.4452	19.7022	19.4346	16.9108	18.2718	21.8332	12.1775	15.3783	16.6022	17.1528	14.4641	14.0043	15.8535	16.2571	16.0433	26.6402	24.8539	12.3353	15.4396	12.1278	12.2376	11.2384	8.8347	9.4095	9.0391	8.8466	8.9917	8.5699	8.1112	10.0538	10.9006	14.4181	13.6942	12.3722	13.9384	14.22	13.8901	17.819	15.3163	15.5729	18.9818	18.7317	13.1577	14.0041	13.3476	14.0036	11.4951	16.8703
634	19.1486	22.8552	19.9858	19.8105	17.1532	18.5364	22.0988	12.2895	15.5647	16.8532	17.3513	14.6069	14.1795	15.9954	16.4188	16.1652	26.9522	25.0775	12.42	15.4973	12.1631	12.2867	11.3507	8.9021	9.4851	9.15	8.9261	9.052	8.6666	8.2129	10.1252	10.9721	14.4499	13.7791	12.4602	14.0434	14.2806	13.9758	17.8755	15.3579	15.6475	19.0549	18.8506	13.2051	14.0128	13.3875	14.0196	11.5769	16.9774
635	19.5013	23.2979	20.2957	20.1455	17.4167	18.8042	22.3987	12.402	15.7628	17.0525	17.5558	14.7893	14.3312	16.1152	16.556	16.3093	27.2834	25.3576	12.5276	15.5073	12.2262	12.318	11.4141	8.9813	9.5577	9.2246	8.993	9.0984	8.7144	8.2292	10.2022	11.0208	14.4931	13.8341	12.5038	14.1244	14.3462	13.9754	17.9316	15.4762	15.6798	19.1085	18.9578	13.2345	14.0436	13.4218	14.0815	11.6332	17.0915
636	19.8337	23.7491	20.6233	20.4487	17.6404	18.963	22.6758	12.4756	15.929	17.2353	17.7377	14.9779	14.4425	16.2348	16.66	16.4191	27.5925	25.5945	12.5896	15.499	12.3269	12.3838	11.4783	9.0421	9.6425	9.3021	9.0814	9.2149	8.7403	8.3025	10.25	11.0784	14.5567	13.8598	12.5181	14.1724	14.4279	14.0663	17.9888	15.5904	15.7209	19.1204	18.99	13.2269	14.0873	13.4841	14.0939	11.6533	17.1597
637	20.1144	24.1107	20.9309	20.7281	17.8879	19.1512	22.9447	12.635	16.0889	17.4597	17.9498	15.1453	14.5857	16.4035	16.8202	16.6004	27.945	25.8748	12.6899	15.5335	12.362	12.4525	11.5572	9.1461	9.7042	9.3648	9.19	9.3104	8.7841	8.3375	10.31	11.1395	14.6152	13.9371	12.6368	14.2428	14.531	14.1982	18.1078	15.7423	15.8161	19.2012	19.0544	13.3173	14.1731	13.5197	14.1509	11.7117	17.3107
638	20.3531	24.4518	21.22	21.0341	18.0602	19.2982	23.2018	12.7351	16.2376	17.6285	18.1001	15.2681	14.7293	16.5572	16.9827	16.7614	28.2101	26.1292	12.7632	15.6069	12.3738	12.4445	11.5863	9.2446	9.7612	9.4021	9.223	9.3332	8.8352	8.3418	10.3452	11.199	14.6793	14.0739	12.7231	14.3258	14.6559	14.2708	18.1896	15.8374	15.8553	19.2755	19.1051	13.435	14.2014	13.5506	14.1959	11.74	17.4398
639	20.6081	24.8065	21.4798	21.3202	18.227	19.5029	23.4287	12.7314	16.3789	17.8107	18.2749	15.4144	14.8336	16.6401	17.103	16.8817	28.4458	26.3081	12.8045	15.6555	12.434	12.4852	11.6183	9.2351	9.7961	9.4243	9.248	9.3411	8.8644	8.3324	10.3746	11.2344	14.7378	14.1664	12.8019	14.3894	14.7268	14.3087	18.248	15.9141	15.9038	19.3888	19.1669	13.4167	14.2393	13.5536	14.2277	11.7789	17.481
640	20.8511	25.163	21.7347	21.5564	18.4687	19.7098	23.679	12.8289	16.5219	18.0379	18.4856	15.5563	14.9708	16.7664	17.1757	16.9812	28.7502	26.5649	12.8573	15.748	12.5053	12.5429	11.7182	9.2661	9.8493	9.4554	9.3157	9.3651	8.8958	8.4228	10.4606	11.2582	14.7826	14.2654	12.8661	14.451	14.7898	14.372	18.3241	15.9586	15.9641	19.4581	19.272	13.432	14.331	13.5688	14.3153	11.8547	17.563
641	21.1088	25.5227	21.9266	21.8174	18.6286	19.8366	23.9152	12.9565	16.6183	18.193	18.6164	15.6985	15.0432	16.8761	17.2407	17.107	28.9892	26.7619	12.9369	15.7999	12.5032	12.6107	11.7655	9.319	9.9008	9.5365	9.3482	9.4223	8.9518	8.4858	10.5	11.2979	14.8347	14.3071	12.8726	14.4984	14.7844	14.4329	18.4165	16.0361	16.052	19.5087	19.2934	13.5087	14.361	13.611	14.3559	11.895	17.6472
642	21.2889	25.7758	22.1063	21.9854	18.7808	19.9594	24.1822	13.0287	16.6944	18.2574	18.7303	15.8291	15.1252	16.9714	17.3635	17.2328	29.1571	26.9244	13.0191	15.8436	12.5463	12.6758	11.8281	9.3867	9.9613	9.636	9.4146	9.5253	9.0363	8.5402	10.5376	11.3509	14.8682	14.3679	12.9432	14.5696	14.8361	14.4717	18.4431	16.1273	16.1395	19.5864	19.3078	13.5434	14.3913	13.6882	14.4187	11.9531	17.7017
643	21.5906	26.0724	22.2967	22.2212	18.9757	20.1329	24.5469	13.1271	16.8706	18.4435	18.8661	15.9799	15.2484	17.0546	17.4603	17.4294	29.363	27.1234	13.1401	15.8835	12.6337	12.7766	11.8664	9.4876	10.0697	9.737	9.5501	9.6259	9.1074	8.6114	10.5657	11.394	14.9246	14.4039	13.0408	14.6521	14.9241	14.5075	18.5014	16.2039	16.2326	19.6503	19.3461	13.6132	14.4695	13.7067	14.4633	12.0445	17.8016
644	21.8481	26.3521	22.5782	22.4769	19.1679	20.347	24.8236	13.2143	17.0097	18.5991	19.0848	16.1619	15.4516	17.185	17.5872	17.5695	29.5707	27.3577	13.2312	15.9593	12.7241	12.8632	11.8941	9.5898	10.173	9.8733	9.6451	9.7385	9.1427	8.6945	10.6083	11.5103	15.0374	14.5054	13.1473	14.7744	15.0132	14.5753	18.5874	16.2664	16.3313	19.6907	19.4672	13.6759	14.5163	13.8109	14.5016	12.1468	17.901
645	22.0223	26.5901	22.7707	22.7001	19.3992	20.5028	25.0121	13.3305	17.1538	18.7545	19.2558	16.2562	15.5677	17.3052	17.7529	17.681	29.8448	27.5827	13.2491	16.0839	12.7689	12.9193	11.9607	9.65	10.258	9.9623	9.7525	9.8323	9.1774	8.7829	10.675	11.5694	15.1559	14.5864	13.2337	14.8363	15.0636	14.6648	18.6358	16.2959	16.348	19.7153	19.4735	13.7205	14.5635	13.8445	14.5565	12.2281	17.9853
646	22.1258	26.7191	22.8662	22.806	19.4803	20.5313	25.0519	13.2879	17.1363	18.8396	19.2657	16.26	15.5532	17.2851	17.7291	17.6417	30.0006	27.6672	13.2683	16.0802	12.7129	12.9053	11.9226	9.6723	10.2251	9.9242	9.7597	9.8421	9.1672	8.735	10.6375	11.5008	15.0728	14.6016	13.2056	14.8288	15.0038	14.6478	18.5687	16.213	16.2699	19.6187	19.4131	13.6882	14.491	13.7923	14.4711	12.1704	17.9499
647	22.3247	26.8767	22.9665	22.9881	19.5289	20.6284	25.0934	13.3126	17.21	18.8915	19.4114	16.3652	15.6079	17.341	17.7477	17.662	30.1622	27.7372	13.3385	16.08	12.6749	12.9127	11.9203	9.6824	10.234	9.8917	9.7637	9.8348	9.1939	8.7052	10.6753	11.499	15.0455	14.6861	13.2039	14.8511	15.079	14.6516	18.6308	16.2018	16.3142	19.6264	19.4698	13.684	14.4873	13.7543	14.4871	12.1987	18.0172
648	22.5084	27.0583	23.0726	23.107	19.558	20.6887	25.2234	13.3951	17.2972	18.8992	19.4509	16.4529	15.6789	17.3357	17.7954	17.7338	30.3339	27.8577	13.3571	16.0051	12.6499	12.8832	11.8952	9.7157	10.2473	9.8437	9.7156	9.8077	9.1249	8.6743	10.6574	11.4753	15.0113	14.6917	13.2142	14.8693	15.1158	14.7089	18.6528	16.1617	16.3312	19.6471	19.4679	13.6544	14.4522	13.7209	14.4663	12.1709	17.9931
649	22.7016	27.3318	23.2146	23.2693	19.7099	20.764	25.4222	13.41	17.4098	19.0352	19.557	16.4892	15.7721	17.397	17.8492	17.8197	30.6154	27.9732	13.3911	15.9692	12.6904	12.9048	11.9204	9.8047	10.2808	9.9266	9.7341	9.8227	9.19	8.733	10.6692	11.5425	15.0292	14.6816	13.2613	14.8816	15.1858	14.7663	18.7179	16.1768	16.3238	19.6578	19.4799	13.6695	14.4709	13.7972	14.4844	12.2068	18.1195
650	22.783	27.5054	23.3713	23.3849	19.8946	20.8877	25.5879	13.4658	17.5071	19.1443	19.6425	16.5691	15.871	17.4394	17.9077	17.9398	30.91	28.1035	13.4461	15.9539	12.6845	12.9391	11.9408	9.8224	10.2994	10.027	9.7709	9.8826	9.2637	8.7525	10.7026	11.6028	15.0799	14.7378	13.2658	14.9061	15.274	14.7739	18.7591	16.2281	16.3621	19.6498	19.4768	13.6856	14.5596	13.8035	14.5047	12.2369	18.2231
651	22.8075	27.5744	23.4307	23.4529	19.9466	20.8913	25.6236	13.4774	17.5102	19.1757	19.6213	16.6026	15.8372	17.4478	17.8584	17.9142	31.0928	28.2315	13.4581	15.8439	12.6468	12.7968	11.8449	9.7688	10.2248	9.9966	9.7388	9.829	9.189	8.6812	10.6206	11.5622	15.046	14.7452	13.249	14.8693	15.2328	14.7644	18.7318	16.2419	16.3878	19.6337	19.4718	13.6086	14.5226	13.6968	14.4407	12.1235	18.1779
652	23.0008	27.8999	23.6492	23.6771	20.0268	21.0207	25.8223	13.6115	17.5816	19.3501	19.7899	16.7141	15.9107	17.5702	17.9485	18.033	31.3713	28.523	13.5262	15.8803	12.6915	12.8022	11.9083	9.8076	10.3036	10.0615	9.8524	9.9388	9.2057	8.7615	10.7055	11.6168	15.1438	14.8661	13.392	14.9589	15.3056	14.849	18.9301	16.349	16.5212	19.7587	19.605	13.72	14.5686	13.8206	14.4944	12.1814	18.284
653	23.2159	28.098	23.8042	23.8211	20.1551	21.1235	26.0254	13.6653	17.6505	19.5198	19.9032	16.8379	15.975	17.6342	18.035	18.0784	31.5921	28.6831	13.6503	15.9417	12.7319	12.8649	11.9974	9.8746	10.4126	10.0878	9.9623	10.0463	9.267	8.8165	10.8118	11.7375	15.2413	14.9643	13.5132	15.0589	15.4481	14.9251	19.0941	16.4025	16.5584	19.9037	19.657	13.8168	14.6294	13.8833	14.5312	12.278	18.3961
654	23.3544	28.2645	23.9552	23.947	20.3313	21.1959	26.1717	13.7077	17.7828	19.6112	19.9909	16.9485	16.1006	17.7485	18.1108	18.1731	31.8654	28.8003	13.7101	15.9532	12.7951	12.9319	12.013	9.9451	10.4719	10.1714	10.0268	10.0661	9.2928	8.8479	10.8367	11.7922	15.3357	15.0095	13.4893	15.1617	15.4129	14.9702	19.1761	16.4942	16.5743	19.9429	19.695	13.829	14.6712	13.8604	14.5662	12.2988	18.4191
655	23.5065	28.4281	24.1126	24.1073	20.4684	21.3672	26.2584	13.7735	17.9056	19.6904	20.0881	17.049	16.2859	17.8944	18.2318	18.3142	32.0937	29.0548	13.8227	16.0336	12.8732	13.0698	12.0877	10.0918	10.6263	10.3316	10.1047	10.1347	9.3631	8.937	10.9059	11.8382	15.3928	15.1	13.5953	15.2897	15.5121	15.1051	19.2833	16.6709	16.7092	19.9511	19.7708	13.8881	14.723	13.9061	14.6232	12.3937	18.4898
656	23.6007	28.5297	24.2015	24.2407	20.5316	21.4786	26.3444	13.8184	18.0171	19.7436	20.1576	17.0662	16.3291	17.9198	18.3056	18.3575	32.2546	29.2281	13.8945	16.0535	12.904	13.0369	12.1365	10.1497	10.7244	10.3694	10.173	10.1369	9.3893	8.9389	10.9355	11.8347	15.3818	15.13	13.6402	15.3139	15.5708	15.165	19.2404	16.7285	16.6852	19.8709	19.7933	13.8915	14.7348	13.9238	14.6797	12.4178	18.5864
657	23.8087	28.7651	24.3289	24.4367	20.7319	21.5585	26.489	13.9027	18.0806	19.7989	20.2711	17.1271	16.3711	18.0043	18.4636	18.4283	32.4282	29.4114	14.0409	16.0614	13.069	13.1095	12.2567	10.222	10.8265	10.4338	10.2033	10.2847	9.5217	9.0254	11.0009	11.8883	15.437	15.2517	13.7606	15.3385	15.6181	15.2681	19.3664	16.817	16.7284	19.911	19.8206	13.9364	14.773	13.9551	14.7814	12.5052	18.7301
658	23.9849	28.9646	24.5005	24.5538	20.9052	21.6527	26.6001	14.0095	18.1672	19.8881	20.4573	17.2731	16.5144	18.1496	18.576	18.5585	32.5988	29.6108	14.2121	16.1038	13.2239	13.2174	12.3805	10.3172	10.9188	10.5468	10.3039	10.4103	9.6568	9.1624	11.0994	12.0233	15.4402	15.3664	13.8573	15.4919	15.7284	15.3232	19.4918	16.8997	16.9009	19.9632	19.9769	13.9902	14.812	14.0261	14.8523	12.6209	18.8027
659	24.0842	29.0687	24.6447	24.6856	21.0796	21.7423	26.7191	14.0838	18.2997	20.0174	20.5593	17.417	16.6832	18.2678	18.6958	18.6602	32.7611	29.7931	14.3208	16.1843	13.3405	13.2627	12.4608	10.377	10.9977	10.6478	10.3995	10.5591	9.7601	9.2452	11.1543	12.115	15.5002	15.4626	13.8576	15.5962	15.8357	15.4056	19.5937	16.9874	16.984	20.0726	20.0728	14.0931	14.8352	14.11	14.9236	12.7232	18.8705
660	24.1364	29.1936	24.7865	24.7867	21.1306	21.7942	26.8843	14.0779	18.409	20.0315	20.5569	17.4954	16.7138	18.2827	18.6774	18.7193	32.9189	29.9142	14.4108	16.2447	13.4012	13.2539	12.4275	10.3987	11.0232	10.6652	10.4184	10.6049	9.7379	9.2629	11.1429	12.086	15.5462	15.4488	13.9075	15.6601	15.8481	15.4531	19.5595	17.0129	16.9668	20.0331	20.1164	14.0795	14.9211	14.0897	14.9203	12.7575	18.9995
661	24.2149	29.2792	24.8598	24.8943	21.2003	21.7866	27.0605	14.1388	18.3994	20.0893	20.5371	17.5156	16.6544	18.2563	18.6672	18.7064	33.0598	29.9835	14.3973	16.2572	13.3889	13.2237	12.4034	10.4406	11.0015	10.6592	10.408	10.6039	9.6882	9.28	11.1681	11.9992	15.603	15.4733	13.9221	15.6227	15.8693	15.5002	19.5187	17.0112	16.9264	20.1046	20.0292	14.0555	14.9233	14.1408	14.871	12.7083	19.0357
662	24.3716	29.4433	24.9108	24.9852	21.2357	21.7674	27.201	14.1946	18.393	20.122	20.5492	17.5524	16.7253	18.2395	18.68	18.7733	33.1343	30.0046	14.4336	16.271	13.4042	13.3207	12.4338	10.5007	11.0335	10.7464	10.4657	10.6538	9.7014	9.2956	11.1778	12.0274	15.6268	15.4757	13.9093	15.6487	15.9482	15.5564	19.601	17.0401	16.9395	20.234	19.9422	14.1688	14.9051	14.1842	14.8743	12.7031	19.0818
663	24.4931	29.5978	24.9293	25.1162	21.2857	21.8811	27.3885	14.2498	18.5109	20.2439	20.7228	17.6494	16.8083	18.3037	18.7473	18.8778	33.3547	30.2035	14.5736	16.2914	13.5084	13.4117	12.5349	10.5603	11.1654	10.8814	10.5932	10.7772	9.8057	9.2905	11.2361	12.1063	15.699	15.5662	14.0463	15.7131	16.0017	15.5287	19.7609	17.1156	17.0969	20.3623	20.0043	14.2449	14.9315	14.2179	14.8971	12.7412	19.2346
664	24.598	29.6469	24.982	25.2105	21.3614	21.9027	27.5267	14.2641	18.6138	20.3484	20.8561	17.7673	16.9242	18.4134	18.8167	18.9712	33.5269	30.4384	14.6797	16.3444	13.5599	13.4761	12.6126	10.5607	11.243	10.9833	10.6857	10.8604	9.8548	9.3587	11.3338	12.2116	15.7531	15.6477	14.1438	15.838	16.0303	15.5981	19.8282	17.1867	17.1563	20.4078	20.175	14.2694	15.0254	14.2258	14.9159	12.8054	19.3705
665	24.662	29.7181	25.1891	25.3183	21.4373	22.0168	27.6464	14.3355	18.6969	20.4788	20.993	17.8551	17.015	18.5593	18.9068	19.0951	33.7828	30.6465	14.8192	16.4675	13.5863	13.544	12.6526	10.6997	11.2984	11.0638	10.7779	10.9189	9.9133	9.4849	11.3698	12.3219	15.7941	15.7431	14.3088	15.948	16.1212	15.7347	19.9161	17.2805	17.2221	20.4741	20.3143	14.4108	15.0861	14.2981	15.0291	12.8499	19.5056
666	24.8431	29.7821	25.3295	25.4572	21.5425	22.1018	27.7994	14.4211	18.7426	20.5386	21.072	17.866	17.0797	18.6065	19.0523	19.1444	33.9589	30.799	14.9018	16.5564	13.6563	13.5984	12.6178	10.8288	11.4098	11.1347	10.8209	10.9903	9.9741	9.5292	11.4048	12.3923	15.8331	15.892	14.3976	16.0362	16.1934	15.8709	20.0001	17.4005	17.2745	20.5	20.3141	14.4264	15.0935	14.3757	15.0686	12.9064	19.5423
667	24.9817	29.9144	25.4093	25.4922	21.5767	22.1485	27.9706	14.4367	18.7334	20.565	21.0964	17.8516	17.119	18.6419	19.1401	19.1608	33.9924	30.9585	14.9056	16.6247	13.6323	13.5911	12.5836	10.9017	11.4297	11.1418	10.8394	11.0497	9.9804	9.5422	11.3782	12.4053	15.8735	15.9704	14.3779	16.0912	16.264	15.8779	20.0554	17.4057	17.2815	20.492	20.3821	14.4001	15.0577	14.4545	15.0626	12.8906	19.5207
668	24.9699	30.0192	25.4051	25.408	21.6162	22.1371	28.0007	14.3782	18.6814	20.5402	21.0628	17.8532	17.1435	18.635	19.1671	19.128	34.0621	31.0155	14.8874	16.6437	13.5623	13.5821	12.5989	10.8856	11.3776	11.1189	10.8052	11.0199	9.9087	9.4893	11.3617	12.3667	15.8561	15.9606	14.3285	16.0603	16.2915	15.8944	20.0606	17.3519	17.264	20.3945	20.3815	14.3229	15.0235	14.4028	15.0834	12.8974	19.5099
669	25.0652	30.1733	25.5285	25.4907	21.7298	22.1643	28.0615	14.4537	18.7583	20.6225	21.1506	17.949	17.2383	18.63	19.2066	19.1958	34.2623	31.1257	15.0188	16.6665	13.6199	13.6413	12.6743	10.9401	11.4574	11.1942	10.8917	11.1031	9.9301	9.5043	11.3703	12.3781	15.8954	15.9319	14.3753	16.0777	16.3806	15.9163	20.1064	17.4219	17.3381	20.3282	20.4145	14.3851	15.1045	14.4013	15.1211	12.9037	19.6229
670	25.1648	30.3286	25.6767	25.7156	21.8594	22.3001	28.2377	14.6051	18.8836	20.778	21.3233	18.0877	17.3462	18.733	19.3216	19.3771	34.4598	31.3093	15.1637	16.8032	13.7373	13.7542	12.8247	11.0581	11.6838	11.3387	11.0477	11.2815	10.0346	9.5409	11.4909	12.5048	15.9968	16.0075	14.4816	16.2328	16.534	16.0621	20.2653	17.5589	17.4182	20.4177	20.5128	14.5082	15.1578	14.5024	15.196	13.0321	19.8396
671	25.238	30.3191	25.7194	25.8079	21.848	22.3234	28.3007	14.6736	18.9321	20.7997	21.402	18.1549	17.4209	18.798	19.2634	19.4281	34.4125	31.4375	15.1912	16.8926	13.8094	13.818	12.9112	11.11	11.8212	11.4298	11.1435	11.325	10.0535	9.6337	11.5555	12.5381	16.0338	16.088	14.5659	16.2596	16.5456	16.1177	20.3098	17.6535	17.4328	20.5301	20.5378	14.5767	15.1128	14.5084	15.1538	13.0633	20.0006
672	25.2839	30.3642	25.7318	25.8891	21.8363	22.3362	28.39	14.6479	18.9382	20.7963	21.4229	18.124	17.437	18.8141	19.2537	19.4851	34.4548	31.5609	15.2057	16.8591	13.8472	13.775	12.8941	11.0811	11.8552	11.4643	11.1199	11.3461	10.1058	9.7346	11.5645	12.4815	16.0398	16.0777	14.6382	16.2795	16.5321	16.0771	20.3215	17.7068	17.4655	20.5421	20.5945	14.627	15.1243	14.5304	15.1891	13.1407	20.0811
673	25.3219	30.4798	25.7367	25.9245	21.8695	22.4022	28.483	14.6677	19.0235	20.835	21.4846	18.1123	17.4908	18.8325	19.3107	19.5319	34.5442	31.6267	15.3379	16.7886	13.8385	13.8344	12.9139	11.1642	11.8951	11.5511	11.2025	11.3737	10.2415	9.7566	11.5694	12.5234	16.0773	16.1076	14.6818	16.3278	16.5851	16.1344	20.3562	17.7455	17.5064	20.6585	20.6206	14.6843	15.2169	14.6218	15.2544	13.183	20.1381
674	25.3768	30.5038	25.7092	25.9658	21.9598	22.4533	28.5881	14.7335	19.0889	20.9507	21.4815	18.2201	17.5164	18.8668	19.4127	19.5201	34.6779	31.7859	15.526	16.7814	13.8967	13.8524	12.9096	11.2282	11.9416	11.6816	11.2564	11.4886	10.3038	9.6957	11.6328	12.605	16.1469	16.1648	14.7103	16.4042	16.6198	16.1998	20.4559	17.7574	17.5629	20.7781	20.7	14.7073	15.3255	14.6628	15.3247	13.192	20.2626
675	25.5448	30.6315	25.8451	26.105	22.1295	22.5717	28.7485	14.8087	19.1391	21.0506	21.5522	18.336	17.5574	19.0441	19.5177	19.5859	34.7904	31.9845	15.6565	16.9009	13.9829	13.8656	13.008	11.3304	11.9166	11.7204	11.4148	11.5276	10.3258	9.7955	11.7204	12.6459	16.1738	16.2763	14.7788	16.514	16.7269	16.2834	20.4955	17.8301	17.6498	20.8563	20.8169	14.8081	15.4103	14.642	15.4382	13.2413	20.3689
676	25.5706	30.7267	25.9234	26.1422	22.1456	22.6119	28.9239	14.7689	19.1713	21.0602	21.6372	18.3854	17.6536	19.1525	19.5667	19.7198	34.8334	32.0229	15.73	16.9156	14.0559	13.9033	13.0767	11.3552	11.9624	11.7531	11.4549	11.532	10.2737	9.9241	11.7277	12.6981	16.2015	16.4191	14.7961	16.5165	16.7771	16.3731	20.6271	17.8598	17.697	20.9372	20.8458	14.7874	15.4428	14.6978	15.4289	13.2517	20.3575
677	25.5314	30.7303	25.9474	26.0551	22.0894	22.5893	28.9605	14.7396	19.1507	21.0444	21.6269	18.3755	17.657	19.0817	19.5531	19.7228	34.8295	32.0746	15.6993	16.9405	14.0647	13.9025	13.0297	11.3901	11.9853	11.7406	11.4407	11.5636	10.2897	9.8743	11.7091	12.6902	16.1265	16.4458	14.77	16.466	16.7868	16.3737	20.6233	17.838	17.7123	20.8801	20.8251	14.7328	15.4002	14.7105	15.428	13.2167	20.3425
678	25.5322	30.8931	26.037	26.1164	22.1583	22.6139	29.0849	14.8275	19.2256	21.1242	21.6483	18.5082	17.7525	19.0938	19.5991	19.7344	35.0348	32.2594	15.777	16.9877	14.129	13.9822	13.0314	11.5288	12.0656	11.8446	11.4824	11.6554	10.3971	9.9345	11.8002	12.7723	16.1605	16.4751	14.8164	16.5154	16.7441	16.3691	20.6529	17.8783	17.7772	20.8543	20.8624	14.836	15.4297	14.7662	15.4321	13.3202	20.4563
679	25.6223	30.9342	26.203	26.2736	22.2261	22.6507	29.2435	14.853	19.1885	21.2051	21.751	18.5443	17.8327	19.1286	19.578	19.807	35.2212	32.4215	15.8792	17.005	14.2163	14.088	13.0875	11.581	12.1367	11.9421	11.5691	11.74	10.4085	9.9521	11.8099	12.7705	16.2265	16.4425	14.8778	16.5829	16.7141	16.438	20.6844	17.9669	17.8323	20.8347	20.9109	14.855	15.5266	14.7866	15.4774	13.3895	20.5142
680	25.8091	30.9738	26.3143	26.3924	22.3401	22.7952	29.3551	14.9686	19.3186	21.2903	21.9172	18.5866	17.9401	19.2437	19.6733	19.9651	35.3653	32.6089	15.9839	17.109	14.3438	14.1905	13.2075	11.7065	12.2825	12.0517	11.7041	11.8822	10.4738	10.0363	11.8818	12.8179	16.3501	16.5628	15.0643	16.7089	16.8892	16.531	20.8278	18.1756	17.9257	20.9195	21.0411	14.9172	15.6184	14.8802	15.4883	13.4431	20.642
681	25.8645	30.9334	26.2889	26.3706	22.3769	22.7862	29.3655	14.988	19.3247	21.3347	21.9397	18.5958	17.9816	19.3203	19.6817	19.9868	35.3828	32.6827	16.1023	17.1397	14.3032	14.2159	13.2559	11.7165	12.3325	12.0798	11.809	11.8695	10.4535	10.0626	11.9055	12.85	16.3661	16.5339	15.045	16.8174	17.0033	16.5483	20.8524	18.1892	17.9919	20.8114	21.1003	14.9142	15.5631	14.8572	15.4733	13.4447	20.7238
682	25.9042	31.1064	26.3226	26.4041	22.4569	22.7974	29.5067	15.0908	19.4492	21.4744	22.005	18.6679	18.0266	19.4498	19.7748	19.9697	35.5038	32.7724	16.2725	17.168	14.4322	14.3016	13.3362	11.8037	12.4919	12.2206	11.8683	11.9476	10.5112	10.1974	11.9567	12.9212	16.4749	16.6722	15.1422	16.9028	17.0382	16.6292	20.9936	18.2942	18.0943	20.9063	21.1838	14.9859	15.6479	14.964	15.5628	13.5589	20.8614
683	25.9995	31.2569	26.4527	26.5981	22.5572	22.857	29.6675	15.1988	19.5826	21.5242	22.1696	18.7613	18.1136	19.5679	19.8826	20.1283	35.6958	32.9246	16.3774	17.337	14.6341	14.4708	13.4941	11.9101	12.5728	12.3467	11.9425	12.0398	10.5723	10.2657	12.0806	13.0177	16.5938	16.8307	15.2602	16.9886	17.1579	16.7435	21.1098	18.4269	18.2775	20.9737	21.3053	15.0895	15.7146	15.0333	15.7089	13.6881	21.0152
684	26.1077	31.3576	26.6548	26.7321	22.6594	23.0091	29.8356	15.3048	19.707	21.6384	22.3243	18.8368	18.2585	19.6406	19.9824	20.3113	35.8086	33.146	16.6143	17.5376	14.7333	14.5641	13.6933	12.1137	12.6147	12.4515	12.0699	12.1994	10.7413	10.3394	12.1865	13.1446	16.7617	16.924	15.3465	17.0983	17.2244	16.8526	21.1752	18.5668	18.3472	21.0335	21.3944	15.2039	15.805	15.1663	15.8498	13.7511	21.1847
685	26.2399	31.3937	26.687	26.7872	22.736	23.1229	29.9541	15.4051	19.8183	21.7018	22.3727	18.9163	18.3598	19.6494	20.0283	20.3581	35.8303	33.1951	16.7569	17.5711	14.7647	14.633	13.7655	12.1927	12.6938	12.5299	12.158	12.3535	10.874	10.371	12.2144	13.2772	16.8188	17.0408	15.4442	17.2541	17.3424	16.9277	21.2487	18.5759	18.402	21.1319	21.444	15.2647	15.8356	15.2371	15.8532	13.7968	21.3032
686	26.3236	31.4864	26.8554	26.9118	22.8251	23.2187	30.0831	15.442	19.9946	21.7157	22.4734	19.0401	18.4458	19.7362	20.1107	20.4118	35.8445	33.2892	16.8049	17.6606	14.8592	14.7694	13.8474	12.2732	12.775	12.6338	12.2993	12.4337	10.877	10.4533	12.2569	13.3319	16.8659	17.1531	15.6295	17.3295	17.4514	17.0339	21.3404	18.5811	18.4722	21.2997	21.5016	15.3075	15.8934	15.3008	15.9407	13.9139	21.3402
687	26.3174	31.5439	26.8636	26.9557	22.8633	23.2077	30.146	15.4156	19.979	21.698	22.5146	19.1343	18.4828	19.7651	20.1657	20.3983	35.784	33.3152	16.8348	17.6634	14.8493	14.7716	13.837	12.2913	12.846	12.6776	12.3449	12.4205	10.9371	10.5195	12.3163	13.3237	16.8891	17.1918	15.6922	17.2799	17.4624	17.1004	21.4147	18.614	18.4683	21.3671	21.5162	15.2505	15.9092	15.3105	16.0683	13.8804	21.4802
688	26.3461	31.6227	26.8327	26.9072	22.9297	23.1318	30.1876	15.4304	19.9019	21.7237	22.4723	19.1072	18.4969	19.8299	20.1822	20.4366	35.8364	33.4108	16.8863	17.6996	14.8444	14.7461	13.833	12.3437	12.9025	12.721	12.36	12.4665	10.9622	10.5302	12.3886	13.3431	16.9247	17.2166	15.7107	17.2798	17.4829	17.13	21.4139	18.6307	18.5729	21.3777	21.5635	15.2928	15.9542	15.2995	16.0476	13.8933	21.6079
689	26.2311	31.5584	26.827	26.903	22.882	23.0539	30.1085	15.4444	19.8148	21.7412	22.4413	19.0593	18.4777	19.7815	20.1936	20.4639	35.7742	33.3969	16.9235	17.7629	14.8027	14.7404	13.8575	12.3311	12.9429	12.7411	12.368	12.4386	10.9857	10.5404	12.3978	13.4198	16.9233	17.2131	15.6456	17.3305	17.4988	17.1192	21.3722	18.6997	18.6068	21.3452	21.574	15.3275	15.997	15.3056	16.0644	13.9179	21.6377
690	26.2456	31.4495	26.822	26.8594	22.8361	22.9848	29.9677	15.4607	19.8072	21.7961	22.453	19.0474	18.5024	19.823	20.2017	20.447	35.8537	33.3825	16.976	17.7745	14.7847	14.7499	13.8316	12.4177	12.9974	12.8125	12.367	12.466	11.0819	10.6587	12.4232	13.4699	16.9546	17.2199	15.6956	17.3227	17.5385	17.2194	21.4378	18.757	18.5863	21.3371	21.5871	15.361	16.0811	15.4445	16.0759	13.9661	21.6638
691	26.2279	31.4688	26.8339	26.8727	22.8802	23.0601	29.9684	15.5295	19.8569	21.8405	22.4519	19.1219	18.4765	19.8371	20.2039	20.5036	35.8905	33.3904	17.0291	17.857	14.8665	14.7368	13.9077	12.4409	13.0382	12.8653	12.3552	12.5686	11.1513	10.7338	12.4391	13.4385	17.0304	17.1806	15.7428	17.3139	17.5053	17.2212	21.535	18.777	18.6284	21.2398	21.6576	15.3786	16.1148	15.4857	16.1204	14.0072	21.7513
692	26.2157	31.5404	26.9044	26.9376	22.9668	23.0869	30.0275	15.5691	19.8818	21.8599	22.459	19.1833	18.6114	19.9754	20.2856	20.5996	35.8603	33.4391	17.1473	17.9421	14.9611	14.8132	14.0017	12.4934	13.1333	12.9222	12.4799	12.6879	11.1514	10.7806	12.5048	13.5196	17.092	17.2442	15.7662	17.3722	17.5822	17.2581	21.59	18.7981	18.6607	21.2095	21.7066	15.4962	16.171	15.5002	16.123	14.0373	21.8481
693	26.2551	31.5558	26.9202	26.9909	23.0017	23.1249	30.1198	15.6042	19.9319	21.8532	22.5365	19.1777	18.6802	19.93	20.3603	20.6459	35.8866	33.4336	17.251	18.0853	15.0139	14.8348	14.0474	12.6068	13.2103	12.9649	12.5763	12.7573	11.1725	10.7697	12.5225	13.5803	17.1523	17.2878	15.8315	17.4281	17.6841	17.3451	21.6143	18.7965	18.663	21.2664	21.8154	15.5544	16.2001	15.5782	16.219	14.1384	21.8415
694	26.3189	31.6144	26.8485	27.0067	22.9921	23.0831	30.2546	15.6027	19.9163	21.8391	22.6493	19.1487	18.6339	19.932	20.353	20.6248	35.9669	33.5055	17.2311	18.1445	14.9579	14.8519	14.065	12.6375	13.208	13.023	12.6363	12.7478	11.1747	10.7242	12.5172	13.5917	17.183	17.3619	15.8432	17.4852	17.7811	17.3307	21.6772	18.7733	18.6081	21.288	21.8351	15.552	16.1578	15.5641	16.2168	14.1527	21.855
695	26.3667	31.684	26.8645	26.9641	22.9262	23.0618	30.3841	15.5844	19.8697	21.8605	22.7423	19.209	18.618	19.9302	20.2912	20.6133	35.9627	33.5506	17.2381	18.21	14.9779	14.7519	13.9863	12.6767	13.2454	13.0996	12.6068	12.7677	11.1768	10.7654	12.5191	13.5781	17.2248	17.4546	15.8344	17.4799	17.7701	17.3477	21.6583	18.8388	18.6492	21.3864	21.8881	15.6091	16.1366	15.5478	16.2359	14.1479	21.9389
696	26.362	31.6334	26.9262	26.9623	22.9238	23.035	30.5602	15.6385	19.9187	21.8847	22.786	19.2457	18.6743	19.9803	20.3387	20.6553	36.0786	33.5564	17.2621	18.2255	14.9718	14.799	14.0599	12.743	13.2769	13.21	12.6499	12.8572	11.222	10.8395	12.5873	13.5987	17.2075	17.4584	15.9336	17.5206	17.7713	17.4256	21.7074	18.8774	18.7851	21.5679	21.8573	15.5962	16.2141	15.6308	16.2821	14.1624	22.002
697	26.4345	31.6331	26.9418	27.0697	22.9263	23.137	30.6603	15.7325	19.9742	21.9857	22.791	19.2511	18.7519	20.0348	20.4411	20.6493	36.1772	33.6275	17.336	18.2952	14.9836	14.8781	14.1322	12.8864	13.42	13.2211	12.8129	12.948	11.3217	10.8878	12.7099	13.6481	17.2824	17.5212	16.0127	17.6473	17.8419	17.4882	21.7997	18.9629	18.8144	21.6732	21.981	15.621	16.2685	15.7256	16.4066	14.3015	22.0444
698	26.5198	31.6728	26.9584	27.0822	22.8938	23.1677	30.6939	15.7508	19.9996	22.0009	22.8153	19.324	18.7308	20.0144	20.5165	20.719	36.1075	33.7531	17.4496	18.3202	15.0251	14.91	14.1904	12.9809	13.5551	13.3311	12.9544	13.0584	11.4517	10.8983	12.7362	13.7008	17.4203	17.554	16.1394	17.7226	17.9232	17.4636	21.9278	19.0578	18.8123	21.7786	22.0223	15.7125	16.3038	15.8047	16.5096	14.3291	22.0709
699	26.5145	31.7361	26.975	27.113	22.9459	23.1902	30.7064	15.7397	20.0611	22.1262	22.8598	19.3768	18.8474	20.118	20.5396	20.7408	36.1096	33.7991	17.5271	18.3444	15.2161	14.9841	14.2231	13.1072	13.7081	13.4651	13.0626	13.1615	11.5277	11.0295	12.8261	13.8188	17.4873	17.6276	16.1918	17.7932	18.0157	17.5859	22.048	19.1035	18.8969	21.8782	21.9999	15.7921	16.418	15.8845	16.5381	14.4372	22.2284
700	26.5398	31.8331	27.0358	27.2308	23.0408	23.2434	30.8516	15.8466	20.1104	22.2331	22.8661	19.4671	18.9216	20.2008	20.599	20.8433	36.2262	33.8434	17.5805	18.46	15.3228	15.0737	14.3131	13.206	13.8872	13.5235	13.1676	13.2852	11.5827	11.0861	12.8956	13.9472	17.5004	17.6794	16.2848	17.8764	18.1614	17.6822	22.1448	19.1076	18.9626	21.9581	22.0588	15.9179	16.5224	15.9006	16.5995	14.562	22.3134
701	26.3434	31.6735	26.9499	27.0866	22.9301	23.247	30.9649	15.8656	20.0238	22.1572	22.9219	19.3835	18.8272	20.0756	20.5507	20.7798	36.142	33.6431	17.6155	18.4469	15.215	15.0883	14.2861	13.1694	13.8757	13.5388	13.1152	13.2071	11.5544	11.0949	12.9568	13.9683	17.4807	17.6731	16.2621	17.854	18.0199	17.7052	22.1809	19.0741	18.9303	21.8471	22.0238	15.8984	16.5012	15.8559	16.6212	14.5201	22.2577
702	26.2401	31.5547	26.9684	26.9873	22.837	23.2039	31.1659	15.8038	20.0146	22.0682	22.9214	19.3132	18.8866	20.0096	20.5554	20.7971	36.0689	33.6159	17.6075	18.4124	15.1764	15.0598	14.2595	13.1481	13.8054	13.5138	13.0938	13.2084	11.5917	11.0812	12.9551	13.853	17.5447	17.7336	16.3092	17.772	18.043	17.7247	22.2177	19.1651	18.8862	21.822	22.1101	15.8641	16.5292	15.873	16.5982	14.4665	22.2322
703	26.32	31.5674	26.8939	26.9495	22.7789	23.1602	31.043	15.9009	20.0605	22.151	22.8424	19.2947	18.8977	20.1402	20.4925	20.9005	36.1364	33.6061	17.6797	18.4211	15.2516	15.1363	14.2854	13.2145	13.7785	13.5546	13.1705	13.2703	11.6724	11.1081	12.9288	13.8962	17.5027	17.7913	16.3402	17.8357	18.0726	17.7995	22.2436	19.2321	18.9768	21.8143	22.1596	15.9265	16.5289	15.9015	16.6006	14.5196	22.3525
704	26.39	31.5795	26.8789	26.9797	22.8089	23.1759	30.9831	15.9302	20.1774	22.1802	22.9645	19.2843	18.9971	20.261	20.5944	21.0542	36.2281	33.4796	17.6943	18.5454	15.3182	15.2997	14.3154	13.3122	13.8617	13.6043	13.2917	13.4187	11.81	11.2773	13.0173	13.9821	17.57	17.7835	16.3089	17.9221	18.16	17.831	22.1866	19.2584	19.1523	21.8424	22.1346	16.0162	16.6071	15.9431	16.6764	14.6311	22.515
705	26.3858	31.5743	26.963	27.0177	22.8152	23.2403	31.0946	15.964	20.1705	22.1679	22.9529	19.401	19.1479	20.4022	20.6355	21.0786	36.303	33.5188	17.7581	18.5613	15.4062	15.3556	14.4834	13.3179	13.9303	13.6948	13.3833	13.4976	11.8859	11.3276	13.025	14.0318	17.5498	17.7444	16.4771	18.0558	18.2367	17.8983	22.276	19.3374	19.1974	22.0278	22.2386	16.0777	16.7105	16.0214	16.756	14.7051	22.618
706	26.4471	31.6194	26.9701	26.9578	22.7212	23.3127	31.043	15.9886	20.1828	22.1916	22.9685	19.5631	19.2149	20.3913	20.6566	21.0589	36.2501	33.5662	17.8114	18.5881	15.4515	15.3376	14.5445	13.4357	13.9989	13.7819	13.3836	13.6549	11.9201	11.336	13.0591	14.1167	17.6374	17.8846	16.5675	18.0926	18.2735	17.955	22.4254	19.3557	19.2807	22.1618	22.4446	16.1516	16.7491	16.1632	16.8963	14.7176	22.8022
707	26.3213	31.505	26.8151	26.8656	22.6401	23.2089	30.9597	15.8919	20.1152	22.1334	22.9208	19.4457	19.2105	20.264	20.6223	21.0157	36.1593	33.3907	17.8416	18.5807	15.4132	15.3087	14.4069	13.4137	13.9453	13.744	13.2851	13.594	11.9085	11.3128	13.0859	14.1707	17.7236	17.9991	16.5405	18.0493	18.3036	18.0014	22.4186	19.3354	19.1888	22.0965	22.4379	16.0697	16.6678	16.1901	16.781	14.7035	22.7306
708	26.3586	31.4787	26.9149	26.9923	22.8323	23.2525	31.0129	16.0386	20.1862	22.173	23.0651	19.5231	19.3052	20.3058	20.8183	21.1781	36.3439	33.4743	17.9313	18.7901	15.5007	15.4345	14.5173	13.5687	14.0316	13.8992	13.3926	13.62	12.013	11.5033	13.3246	14.3027	17.8447	18.1283	16.7193	18.2072	18.4866	18.1161	22.4649	19.4714	19.2456	22.2219	22.6028	16.2783	16.8185	16.3289	16.8761	14.8597	22.7333
709	26.369	31.3866	26.8186	26.8751	22.833	23.337	30.9452	16.1273	20.1781	22.2231	23.1362	19.5574	19.2934	20.3316	20.8543	21.1359	36.303	33.4317	17.9054	18.7575	15.5178	15.4174	14.5712	13.5293	13.987	13.9797	13.4754	13.6188	11.9821	11.5487	13.3129	14.2481	17.7754	18.1401	16.7266	18.2521	18.4595	18.1036	22.4394	19.4446	19.3296	22.18	22.6597	16.3129	16.8687	16.3122	16.9679	14.855	22.7381
710	26.4188	31.4791	26.7832	26.9597	22.8648	23.4931	31.1079	16.238	20.3407	22.417	23.2694	19.6833	19.3253	20.5713	20.9053	21.2328	36.3959	33.5115	18.0505	18.7716	15.6531	15.5104	14.7718	13.6037	14.2079	14.1164	13.5753	13.7677	12.1849	11.7088	13.4217	14.3249	17.8891	18.3003	16.9462	18.3662	18.5375	18.2527	22.5107	19.5419	19.5284	22.3758	22.7242	16.4269	17.0169	16.391	17.1171	14.9609	23.004
711	26.4787	31.5804	26.9011	27.0102	22.967	23.4122	31.2905	16.2504	20.4591	22.4973	23.3127	19.8721	19.4167	20.6382	20.9562	21.2916	36.4949	33.5234	18.1884	18.7393	15.8032	15.7126	14.8814	13.7631	14.3362	14.217	13.7555	13.9138	12.3839	11.8127	13.5422	14.5321	18.0685	18.3606	16.9777	18.4173	18.682	18.3917	22.5535	19.6266	19.6112	22.4429	22.7896	16.4748	17.1018	16.5599	17.229	15.1	23.0952
712	26.5437	31.6105	26.9521	27.0438	22.9769	23.4855	31.3605	16.2933	20.4862	22.5003	23.2633	19.8909	19.4111	20.629	20.9692	21.4082	36.6282	33.5351	18.3476	18.8022	15.8412	15.817	14.866	13.7612	14.3447	14.3197	13.7533	14.0064	12.4101	11.8615	13.5846	14.6399	18.161	18.4015	16.9928	18.4748	18.7201	18.5038	22.7927	19.7227	19.6215	22.5318	22.8779	16.5242	17.0396	16.7155	17.4157	15.1592	23.1133
713	26.4739	31.5351	26.9493	27.0398	22.9954	23.5708	31.3897	16.4095	20.4733	22.5136	23.3416	19.9114	19.4199	20.7936	21.0721	21.482	36.7758	33.46	18.4482	18.8935	15.9032	15.7778	14.9707	13.7898	14.4481	14.3219	13.8112	14.0202	12.4623	11.9489	13.7434	14.8203	18.3471	18.4739	17.0109	18.5511	18.8468	18.5309	23.0686	19.8949	19.7331	22.5147	23.0229	16.6509	17.0895	16.8955	17.4553	15.2642	23.2054
714	26.5106	31.5021	27.0088	27.0176	23.0182	23.6023	31.4332	16.5264	20.4641	22.6697	23.4256	19.9398	19.5564	20.852	21.1796	21.5212	36.7578	33.442	18.4554	19.0271	16.0325	15.8237	15.059	13.9492	14.5705	14.4581	13.9972	14.0713	12.5476	12.0842	13.8452	15.0382	18.4668	18.5997	17.1162	18.6258	18.9724	18.7408	23.2274	20.0262	19.8806	22.6387	23.0104	16.8003	17.2504	16.9494	17.5466	15.3414	23.3905
715	26.4772	31.5969	27.0361	27.0631	22.9834	23.6428	31.4764	16.5588	20.5115	22.6176	23.477	19.9552	19.7586	20.8276	21.2295	21.5751	36.5927	33.445	18.5117	19.089	16.0453	15.8654	15.0769	14.1038	14.668	14.6609	14.0811	14.169	12.6222	12.2044	13.9172	15.1013	18.4453	18.5921	17.1757	18.677	19.0265	18.8601	23.1933	20.1089	19.9684	22.7349	23.1179	16.8511	17.3759	16.9131	17.6913	15.433	23.5674
716	26.4718	31.527	27.0302	27.0047	22.9771	23.6352	31.4529	16.5991	20.5476	22.5062	23.4878	20.0122	19.8434	20.8925	21.256	21.6373	36.6115	33.5574	18.529	19.0704	16.0973	15.8747	15.1366	14.1746	14.8218	14.6247	14.1842	14.2313	12.7142	12.278	13.9821	15.0557	18.5116	18.6965	17.3287	18.8087	19.1485	18.8367	23.2032	20.1511	20.0437	22.7712	23.2028	16.882	17.4916	17.0337	17.7725	15.5677	23.602
717	26.3593	31.3915	26.8376	26.862	23.0734	23.5618	31.5242	16.6067	20.5721	22.6007	23.5016	19.9929	19.697	20.9264	21.2392	21.7157	36.6773	33.4785	18.4321	19.0914	16.138	15.8162	15.1264	14.1622	14.9309	14.6423	14.2348	14.258	12.8172	12.3724	14.1069	15.1918	18.5736	18.8267	17.4928	18.8634	19.2183	18.8344	23.3604	20.1737	20.068	22.7208	23.4053	16.929	17.6356	17.2907	17.767	15.6762	23.6208
718	26.2751	31.3445	26.8566	26.7754	23.1121	23.6903	31.6344	16.6703	20.6106	22.6517	23.5495	20.0434	19.7193	20.8815	21.2782	21.6574	36.753	33.4106	18.4388	19.29	16.1842	15.8109	15.2693	14.2624	14.9231	14.696	14.2804	14.3375	12.9135	12.491	14.2374	15.2758	18.6747	18.8737	17.6389	18.9894	19.2568	18.94	23.2859	20.2316	20.0956	22.7189	23.5097	17.1132	17.756	17.3935	17.7801	15.7243	23.6529
719	26.1976	31.1084	26.7951	26.6815	22.9234	23.5784	31.5306	16.5956	20.5619	22.5523	23.3999	19.9903	19.7376	20.843	21.2825	21.5926	36.6083	33.4286	18.511	19.2435	16.2136	15.8513	15.3515	14.3532	14.8813	14.6706	14.3432	14.4103	12.8891	12.5247	14.2751	15.1888	18.6815	18.7125	17.6188	19.0738	19.2628	18.9709	23.1416	20.2468	20.1261	22.7041	23.4919	17.1708	17.7201	17.3761	17.8239	15.7322	23.5971
720	26.3907	31.0966	26.7677	26.7521	22.9201	23.5481	31.3145	16.6137	20.4973	22.4978	23.4866	20.0826	19.8147	20.9419	21.3791	21.6654	36.5961	33.358	18.6859	19.3506	16.3052	15.9603	15.4709	14.4835	14.8994	14.7486	14.2699	14.4759	12.9534	12.619	14.2735	15.1841	18.7174	18.8057	17.6247	19.1152	19.3956	18.9783	23.1339	20.3153	20.2917	22.9165	23.5679	17.2495	17.649	17.4134	17.8886	15.7944	23.6591
721	26.3895	31.0732	26.6368	26.7964	22.9764	23.4996	31.3748	16.7687	20.569	22.522	23.5881	20.11	19.9372	21.0419	21.4291	21.6256	36.701	33.3251	18.7202	19.3353	16.2994	16.0167	15.4673	14.5192	15.0741	14.8157	14.3598	14.5369	13.0435	12.7675	14.2638	15.2814	18.7908	19.0035	17.791	19.208	19.4043	19.13	23.3801	20.4335	20.3599	23.1142	23.7398	17.3872	17.7584	17.5331	17.9966	15.8566	23.6468
722	26.3051	31.0276	26.6693	26.7052	23.0765	23.5731	31.6269	16.8938	20.7648	22.6475	23.6449	20.1127	20.037	21.0333	21.4211	21.6922	36.5952	33.38	18.8244	19.4284	16.3058	16.1374	15.5537	14.6027	15.1815	15.0671	14.5219	14.5983	13.2435	12.8621	14.4325	15.5083	18.9702	19.1037	17.8549	19.2826	19.5009	19.2188	23.6275	20.4308	20.5272	23.1365	23.9115	17.5119	18.007	17.7081	18.0958	15.9801	23.7258
723	26.399	31.101	26.7447	26.7876	23.1433	23.7148	31.7126	17.0469	20.8856	22.8464	23.6179	20.2842	20.0232	21.2192	21.5191	21.8447	36.5504	33.4354	18.986	19.4966	16.5973	16.3208	15.7201	14.8106	15.3865	15.3181	14.7394	14.829	13.5879	13.0708	14.817	15.7744	19.1654	19.1569	17.9519	19.4023	19.7157	19.3606	23.8383	20.5494	20.7369	23.47	24.0554	17.6625	18.2401	17.9323	18.3746	16.3244	23.9495
724	26.3417	31.0728	26.8092	26.8004	23.0643	23.724	31.5971	17.0672	20.8488	22.8549	23.5921	20.3317	20.0547	21.2581	21.5849	21.971	36.4873	33.3613	18.9405	19.6383	16.8291	16.4314	15.7639	14.9267	15.3987	15.3598	14.8337	14.8651	13.6179	13.1216	14.8852	15.9351	19.1358	19.3081	18.0106	19.6094	19.7556	19.4191	23.6896	20.6189	20.9114	23.6865	24.0154	17.7914	18.1886	18.1251	18.4975	16.4938	24.0085
725	26.2125	30.9134	26.6492	26.6492	22.8303	23.7164	31.3882	17.0999	20.7189	22.797	23.7043	20.1865	19.9142	21.2825	21.5581	22.02	36.473	33.1583	18.969	19.716	16.7924	16.4106	15.8655	14.7523	15.3765	15.2594	14.918	14.9532	13.6155	13.1317	14.8563	15.9238	19.1402	19.4384	17.9631	19.6733	19.8584	19.453	23.6791	20.6348	20.9282	23.7075	24.0442	17.9351	18.2199	18.1661	18.4579	16.5474	24.0595
726	26.1254	30.8649	26.4739	26.5583	22.8242	23.7383	31.3871	16.9729	20.6984	22.8153	23.6948	20.1758	20.0956	21.239	21.4427	22.0083	36.4145	33.0758	19.1692	19.7187	16.8894	16.4607	15.8621	14.7867	15.5359	15.3748	14.9484	14.9955	13.7748	13.2948	14.8574	15.875	19.2209	19.3349	18.0598	19.625	19.968	19.5464	23.7842	20.7233	20.8882	23.6442	24.0586	17.9874	18.3578	18.3369	18.53	16.7994	24.1957
727	26.0428	30.9343	26.566	26.5685	22.9086	23.6553	31.5202	16.9761	20.705	22.8203	23.6988	20.2507	20.2196	21.1777	21.5144	21.8511	36.3993	33.1371	19.2144	19.7741	17.0161	16.4751	15.8161	14.9364	15.5484	15.4897	14.9734	14.9896	13.7959	13.4168	14.9728	15.9138	19.3287	19.2532	18.2284	19.5575	19.9693	19.4928	23.7211	20.7628	20.8686	23.6669	24.0784	17.9557	18.4797	18.3074	18.7301	16.8112	24.2441
728	26.0823	30.7773	26.6462	26.5647	22.9663	23.5982	31.6659	17.1143	20.7569	22.8654	23.6806	20.2572	20.2401	21.4005	21.6283	21.93	36.2557	33.1561	19.1691	19.84	17.0374	16.53	15.9519	15.0418	15.6837	15.4333	15.1041	15.1319	13.8997	13.4627	15.2721	15.9895	19.3341	19.3832	18.4667	19.7513	20.0972	19.7398	23.7397	20.9337	20.9301	23.8055	24.2041	18.1988	18.5486	18.437	18.8984	16.8283	24.3289
729	26.0826	30.7586	26.6376	26.5177	22.9553	23.6215	31.8946	17.1951	20.8588	22.87	23.7393	20.2954	20.425	21.4898	21.7832	22.0075	36.361	33.2193	19.2401	19.8941	17.062	16.5915	16.0348	15.0378	15.5992	15.5565	14.9676	15.25	14.0723	13.6497	15.3349	16.1406	19.504	19.6239	18.5147	19.9836	20.2652	19.8302	23.8094	20.9291	21.0014	23.603	24.3566	18.5178	18.6376	18.5881	19.1028	16.9689	24.5639
730	26.139	30.6446	26.3935	26.3919	22.8392	23.6106	31.7144	17.1321	20.9978	22.8094	23.7096	20.3316	20.5468	21.4198	21.7583	21.8764	36.339	33.0703	19.2215	19.8418	17.0556	16.6965	15.9983	14.8824	15.5472	15.6599	15.0859	15.2266	14.1222	13.6243	15.4032	16.2629	19.6417	19.4786	18.4098	19.9242	20.1746	19.7431	23.7992	20.7991	21.0266	23.4838	24.3241	18.5163	18.6671	18.5985	19.0599	16.9329	24.438
731	26.1393	30.5507	26.3129	26.3266	22.7451	23.4795	31.6659	17.3182	20.8838	22.9743	23.7896	20.4328	20.5452	21.4243	21.6857	21.7276	36.1484	33.0867	19.355	19.9136	17.1473	16.8869	15.9392	14.8644	15.5429	15.649	15.0131	15.0051	14.1416	13.5632	15.3778	16.3424	19.7463	19.4399	18.5432	19.9443	20.0743	19.7926	23.8057	20.8532	20.9621	23.4732	24.4248	18.2845	18.6594	18.6888	19.0643	17.0988	24.2695
732	26.066	30.5056	26.27	26.2478	22.7581	23.4331	31.727	17.3254	20.6179	23.0217	23.6091	20.2839	20.3497	21.4542	21.7061	21.6938	36.0612	33.0441	19.3329	19.8685	17.2687	16.9114	16.0064	14.9134	15.4236	15.5107	15.0166	14.9264	13.9827	13.598	15.3424	16.3951	19.7101	19.4572	18.4571	19.9939	20.0843	19.8417	23.8391	20.8311	20.8895	23.3841	24.4614	18.2924	18.6727	18.7977	19.0047	17.227	24.2614
733	26.0101	30.5148	26.4794	26.3694	22.8828	23.5405	31.6695	17.3548	20.7455	23.0889	23.7113	20.3916	20.4129	21.4074	21.8237	21.8668	36.1586	33.1919	19.4432	20.0052	17.3653	17.0153	16.2833	15.0836	15.6524	15.559	15.2065	15.1807	14.1802	13.7403	15.4607	16.4844	19.892	19.6106	18.5374	20.0294	20.2659	19.8878	23.9635	20.8153	20.964	23.4933	24.5895	18.4036	18.8525	18.8965	19.2115	17.3465	24.3064
734	26.0335	30.6438	26.5007	26.3007	22.8975	23.721	31.551	17.3332	20.9925	22.9715	23.6977	20.5283	20.4715	21.5009	21.8947	22.0278	36.3228	33.2657	19.5381	20.1355	17.4006	17.0808	16.3988	15.3032	15.8648	15.6855	15.3716	15.384	14.4708	13.931	15.5312	16.6503	20.0438	19.6511	18.7549	20.1552	20.3836	19.9354	24.0376	20.9499	21.1768	23.6675	24.648	18.5221	18.9472	18.9655	19.3397	17.4028	24.4834
735	26.1513	30.637	26.4751	26.3825	23.0148	23.8007	31.4117	17.4295	21.0392	23.0163	23.8535	20.5846	20.486	21.5548	22.0329	22.2597	36.4127	33.2953	19.5238	20.289	17.4468	17.1394	16.441	15.4153	15.9035	15.8181	15.4092	15.4773	14.46	13.9819	15.6392	16.7525	20.102	19.7284	18.7297	20.2424	20.5157	20.0362	23.9422	21.0524	21.1172	23.8081	24.6171	18.5773	19.0123	18.9672	19.3389	17.3827	24.5807
736	26.2935	30.7606	26.4601	26.689	23.142	23.8448	31.5889	17.4848	21.139	22.924	24.0158	20.6064	20.6022	21.6685	22.2377	22.306	36.5054	33.3529	19.5881	20.4058	17.657	17.184	16.5455	15.6319	16.1459	16.0468	15.5576	15.6562	14.5555	14.0628	15.8672	16.8385	20.0539	19.8696	18.846	20.4041	20.577	20.255	23.9927	21.2441	21.1957	24.072	24.7453	18.6982	19.0831	19.1675	19.4768	17.5527	24.7923
737	26.3481	30.8173	26.4968	26.8658	23.1613	23.8705	31.9356	17.6936	21.1637	23.1696	24.1674	20.9068	20.8041	21.8934	22.4847	22.5282	36.6585	33.5262	19.6459	20.478	17.6888	17.427	16.6063	15.7772	16.406	16.2253	15.7871	15.9317	14.8069	14.222	15.9285	17.0706	20.2391	20.0328	18.9856	20.5618	20.7435	20.4406	24.2797	21.6247	21.5106	24.2976	25.1664	18.8706	19.3466	19.3345	19.8502	17.8661	25.1288
738	26.0873	30.6017	26.3799	26.6342	23.106	23.8672	31.8884	17.697	21.0573	23.0699	24.0371	20.817	20.8868	21.8102	22.2207	22.535	36.5324	33.4802	19.6676	20.4687	17.5301	17.2789	16.5379	15.7686	16.3836	16.1919	15.9174	15.9421	14.8437	14.2524	15.855	17.0649	20.2803	20.0363	19.0609	20.4986	20.7491	20.5292	24.1734	21.7156	21.6437	24.2804	25.0777	18.9817	19.2633	19.3776	19.8318	17.8424	25.0975
739	25.9005	30.5412	26.1337	26.3303	22.8559	23.8043	31.8515	17.719	20.9945	22.9383	24.0402	20.696	21.0281	21.7464	22.1235	22.4025	36.3158	33.3171	19.6333	20.3708	17.4581	17.0832	16.4072	15.7851	16.3326	16.136	15.7093	15.8467	14.6874	14.211	15.9926	17.1253	20.2258	20.0585	19.0144	20.2956	20.8837	20.5512	24.0054	21.6848	21.706	24.3648	24.8848	19.0453	19.3159	19.3387	19.922	17.8651	24.9199
740	25.6175	30.5123	25.9786	26.187	22.6929	23.7854	31.8551	17.7116	21.1407	22.9857	24.022	20.6775	20.9562	21.7574	22.1027	22.2837	36.2254	33.2956	19.5818	20.1471	17.4251	17.1046	16.3034	15.7866	16.2622	16.1099	15.7736	15.8179	14.6536	14.2953	16.0788	17.1075	20.1211	20.0866	18.922	20.426	20.8957	20.4547	23.8617	21.5144	21.5297	24.2231	24.8005	19.2339	19.0993	19.4089	19.9623	17.8243	24.8764
741	25.6243	30.5071	25.9092	26.1057	22.6789	23.7945	31.9766	17.7885	21.1728	23.0387	24.1332	20.7931	21.0299	21.6202	22.0557	22.177	36.0612	33.4384	19.6297	20.0927	17.4467	17.1955	16.1989	15.7303	16.2761	16.3221	15.8377	15.8061	14.6774	14.3299	16.2235	17.1158	20.2543	20.0995	19.0491	20.6557	20.8351	20.5302	24.0128	21.5103	21.7145	24.2815	24.902	19.3554	19.396	19.5168	20.0532	17.9813	24.9725
742	25.7571	30.3556	25.9093	26.0183	22.6773	23.7189	31.797	17.6454	21.0573	22.8261	24.055	20.708	21.0644	21.588	22.0855	22.0882	35.9952	33.4816	19.4404	20.2319	17.3564	17.0396	16.322	15.6872	16.2549	16.2833	15.831	15.7716	14.7288	14.293	16.2241	17.0264	20.3998	20.0371	18.9808	20.5783	20.6987	20.4567	24.1756	21.6789	21.786	24.1314	25.0784	19.3864	19.5081	19.4031	20.0998	18.0198	25.0167
743	26.0012	30.431	25.9676	26.3395	23.0865	23.9082	31.8142	17.7758	21.2473	23.1459	24.155	20.9352	21.281	21.892	22.3432	22.5447	36.2691	33.7343	19.6915	20.4585	17.5243	17.2354	16.5423	16.0206	16.6728	16.3103	16.0582	16.194	15.1962	14.5167	16.394	17.2525	20.6159	20.3483	19.3795	20.8581	21.0407	20.6311	24.6544	21.7383	21.8738	24.4075	25.391	19.65	19.7604	19.6905	20.332	18.2855	25.2198
744	26.1199	30.6179	26.0756	26.4582	23.1797	24.0956	31.9985	18.0111	21.2972	23.3376	24.2633	21.084	21.2787	22.0136	22.4448	22.9138	36.342	33.7729	19.8522	20.5917	17.6177	17.3587	16.5971	16.23	16.8306	16.5311	16.3069	16.2356	15.1933	14.6573	16.4333	17.3263	20.7619	20.6024	19.533	21.1766	21.1653	20.8122	24.709	21.7242	21.9269	24.6306	25.3724	19.7422	19.8446	19.9503	20.4121	18.4782	25.2358
745	26.1434	30.8654	26.3911	26.5842	23.1223	24.3793	32.0936	18.3027	21.4953	23.6055	24.4663	21.3191	21.4617	22.057	22.7723	23.0472	36.4555	34.0571	19.8312	20.6501	17.8461	17.5766	16.9152	16.5627	17.159	16.7464	16.5032	16.4127	15.3443	14.9161	16.5326	17.7462	20.9218	20.9287	19.7184	21.3445	21.4775	20.9731	24.7144	21.9633	22.1121	24.7067	25.4704	19.9272	20.0231	20.1214	20.6604	18.6546	25.4921
746	26.0797	30.6633	26.5719	26.3898	23.1694	24.2359	32.0676	18.2294	21.5615	23.5211	24.4957	21.2571	21.5522	21.9955	22.8546	23.0235	36.3443	33.8829	20.0472	20.6125	17.9805	17.4768	16.9581	16.5612	17.2155	16.8765	16.6282	16.5568	15.383	14.8958	16.525	17.8193	20.9104	21.0949	19.8347	21.2421	21.5222	21.0791	24.802	22.0202	22.0654	24.5797	25.5196	19.8146	20.1321	20.0426	20.6812	18.5351	25.4686
747	26.0541	30.486	26.4122	26.4686	23.1794	23.9437	32.0091	18.0389	21.3872	23.5064	24.2915	21.2159	21.5526	22.1759	22.7267	23.0287	36.2549	33.9816	20.1181	20.8578	17.9449	17.4128	16.8403	16.5969	17.1832	16.945	16.672	16.8143	15.3716	15.0683	16.5787	17.5795	21.0002	20.9729	19.9275	21.1922	21.4933	21.1744	24.9624	21.8979	22.0836	24.6134	25.5634	19.8196	20.2204	20.1131	20.8352	18.6497	25.454
748	25.8665	30.2039	26.0718	26.3691	23.0619	23.8299	31.8238	17.8624	21.429	23.3384	24.1558	20.9722	21.3977	22.2081	22.6168	22.7306	36.2734	33.7357	19.8975	20.7596	17.7388	17.306	16.6975	16.5908	17.0328	17.0936	16.4945	16.6026	15.286	14.9211	16.5912	17.4398	20.8846	20.7537	19.744	20.9371	21.4411	21.0134	24.9385	21.956	22.1844	24.4222	25.5191	19.752	19.9312	20.0506	20.8369	18.7125	25.3549
749	25.8927	30.3314	25.9557	26.4636	23.0992	23.9386	31.7479	17.9063	21.45	23.2566	24.3953	21.0783	21.4814	22.0888	22.7284	22.8611	36.4236	33.9297	19.8865	20.8428	17.7233	17.371	16.9697	16.695	17.2486	17.1244	16.5685	16.669	15.361	15.0015	16.6855	17.8489	20.9007	20.7894	19.8699	20.9145	21.7498	21.0874	24.829	22.0667	22.1664	24.5558	25.7131	19.8968	20.0109	20.1259	20.7785	18.6502	25.4844
750	25.9768	30.2992	26.0613	26.4581	23.1854	23.9265	31.9989	18.0373	21.4479	23.3488	24.3753	21.2441	21.6181	22.2551	22.6858	22.9227	36.5214	34.2605	20.0281	20.7205	17.8882	17.6092	17.0084	16.7864	17.2425	17.1191	16.677	16.8341	15.4491	15.2189	16.7333	17.9882	21.004	20.9231	19.9958	21.0009	21.7145	21.1618	24.8776	22.0106	22.1467	24.7648	25.652	19.9627	20.0964	20.0931	20.841	18.9013	25.7608
[truncated: 12 more columns]
